# Supplementary material
Source: PubMed Central journal article supplement (PMC5936649)

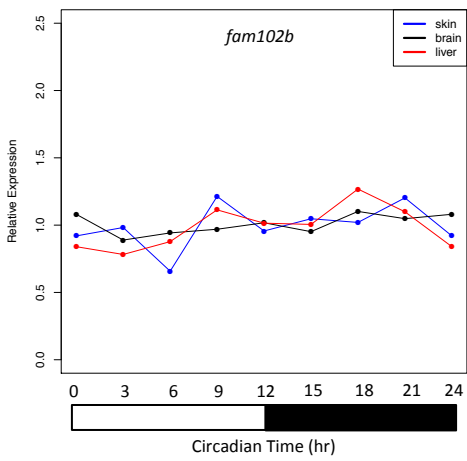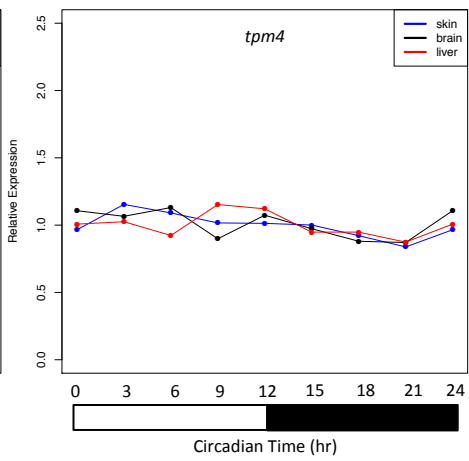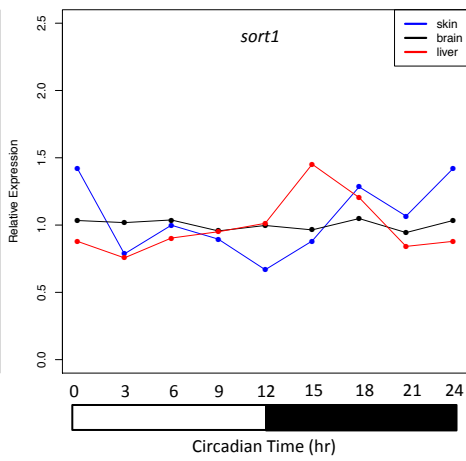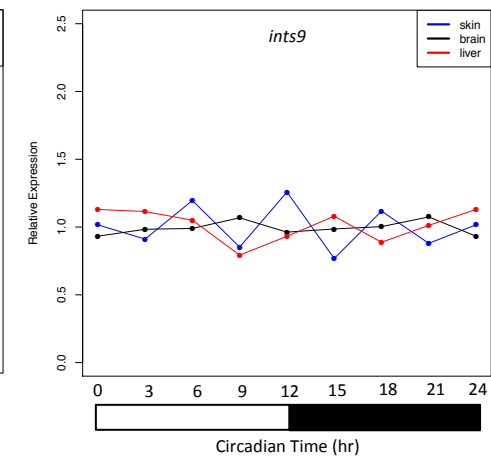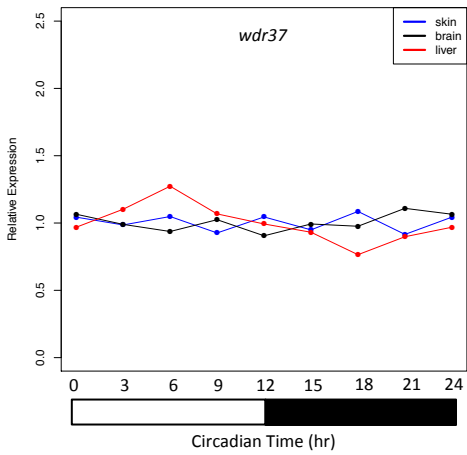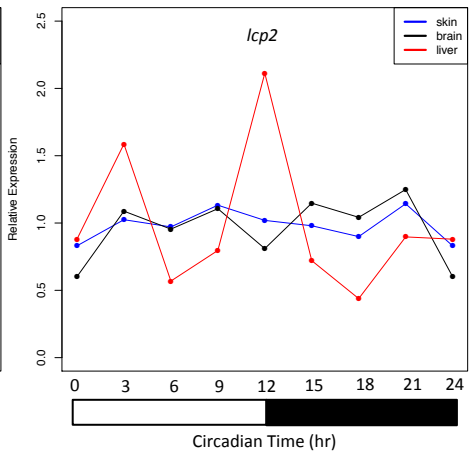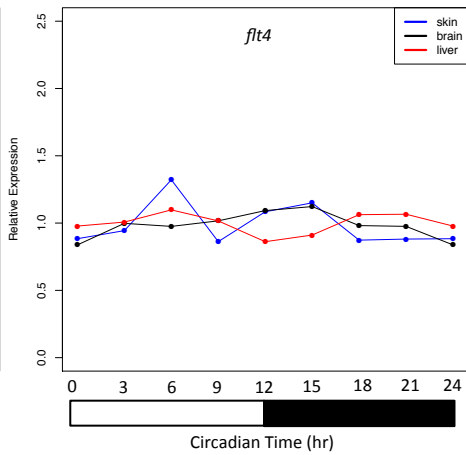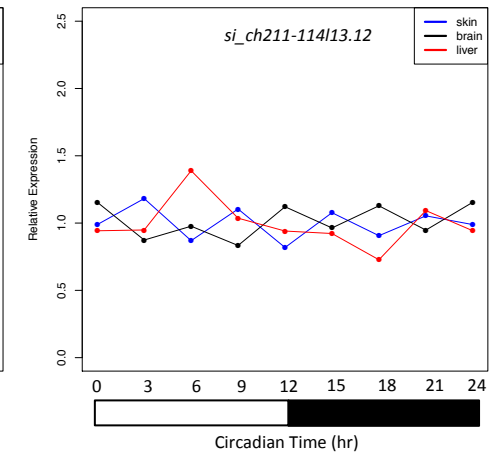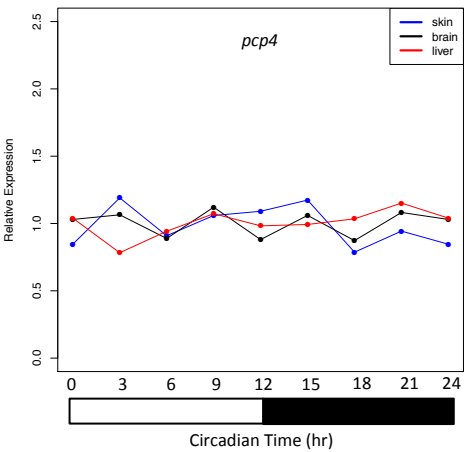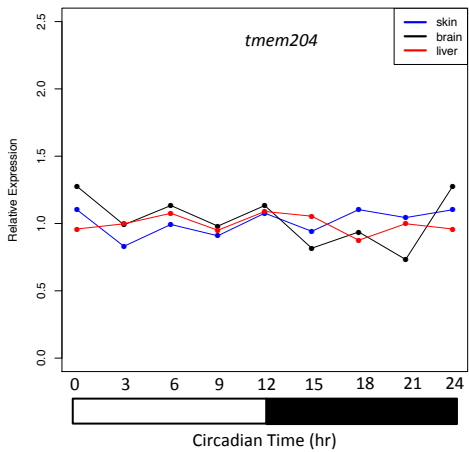

Supplement Figure 1

(a)

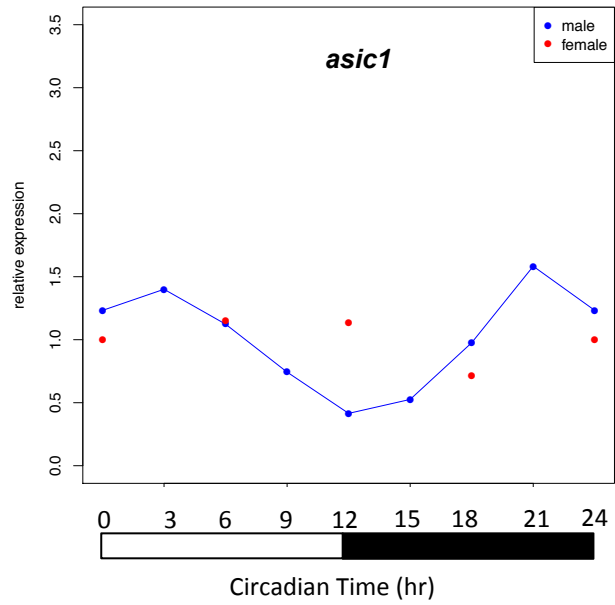

(b)

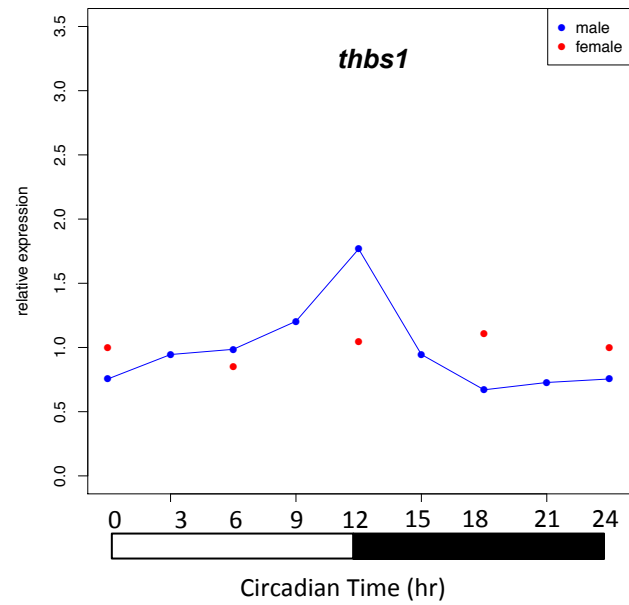

### Supplement Figure 3 6-4 photolyase

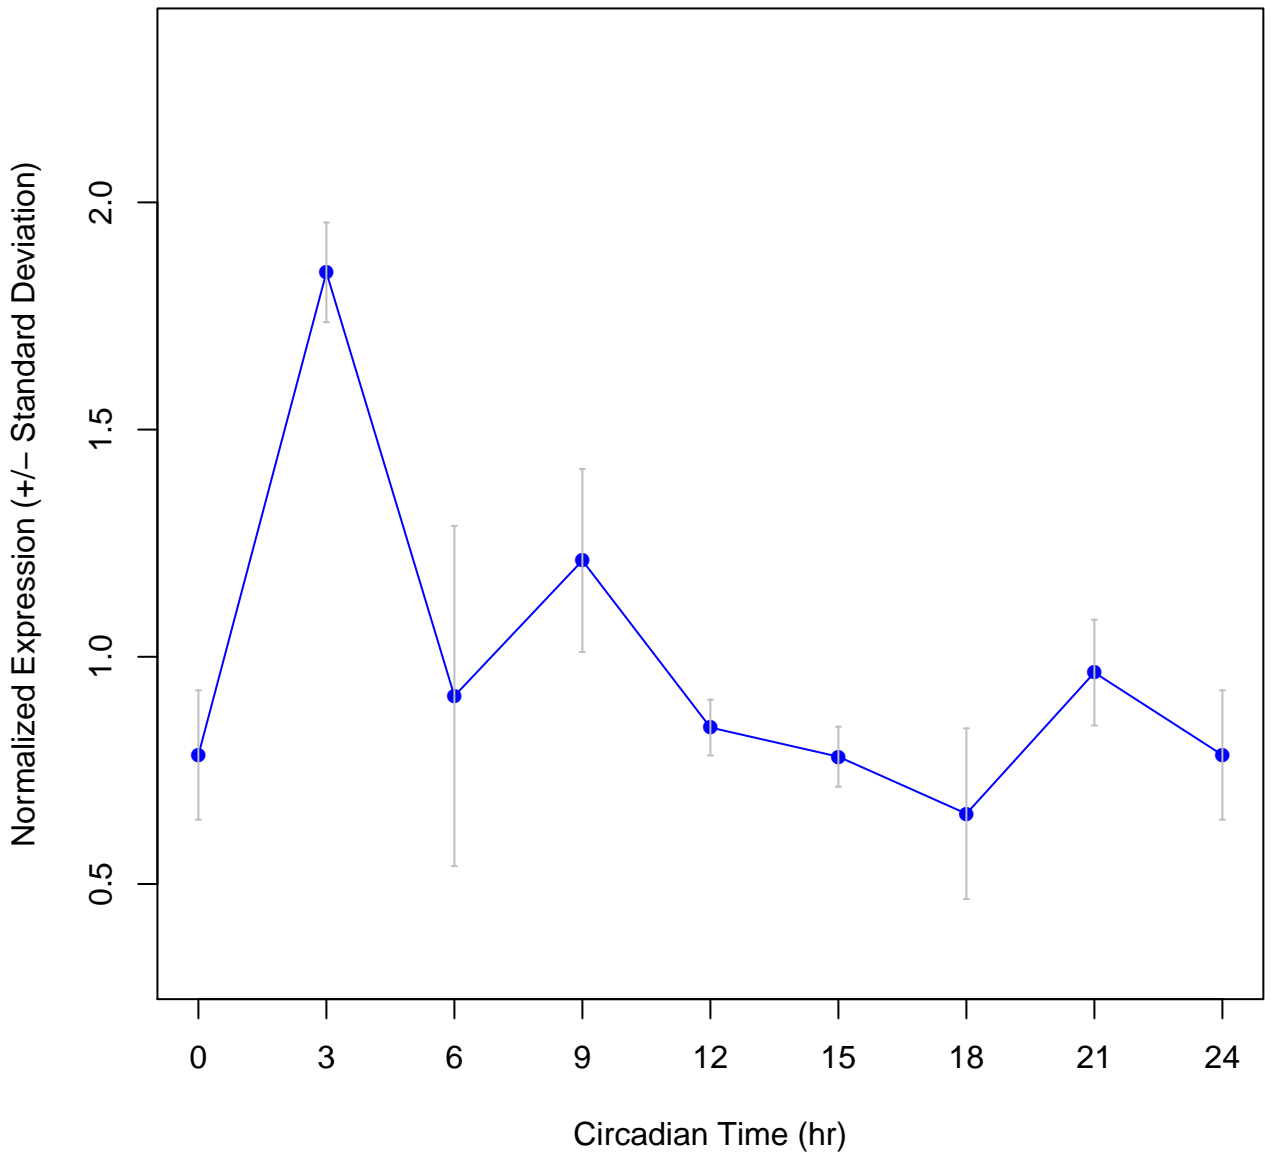

Supplement Figure 3 a2ml1

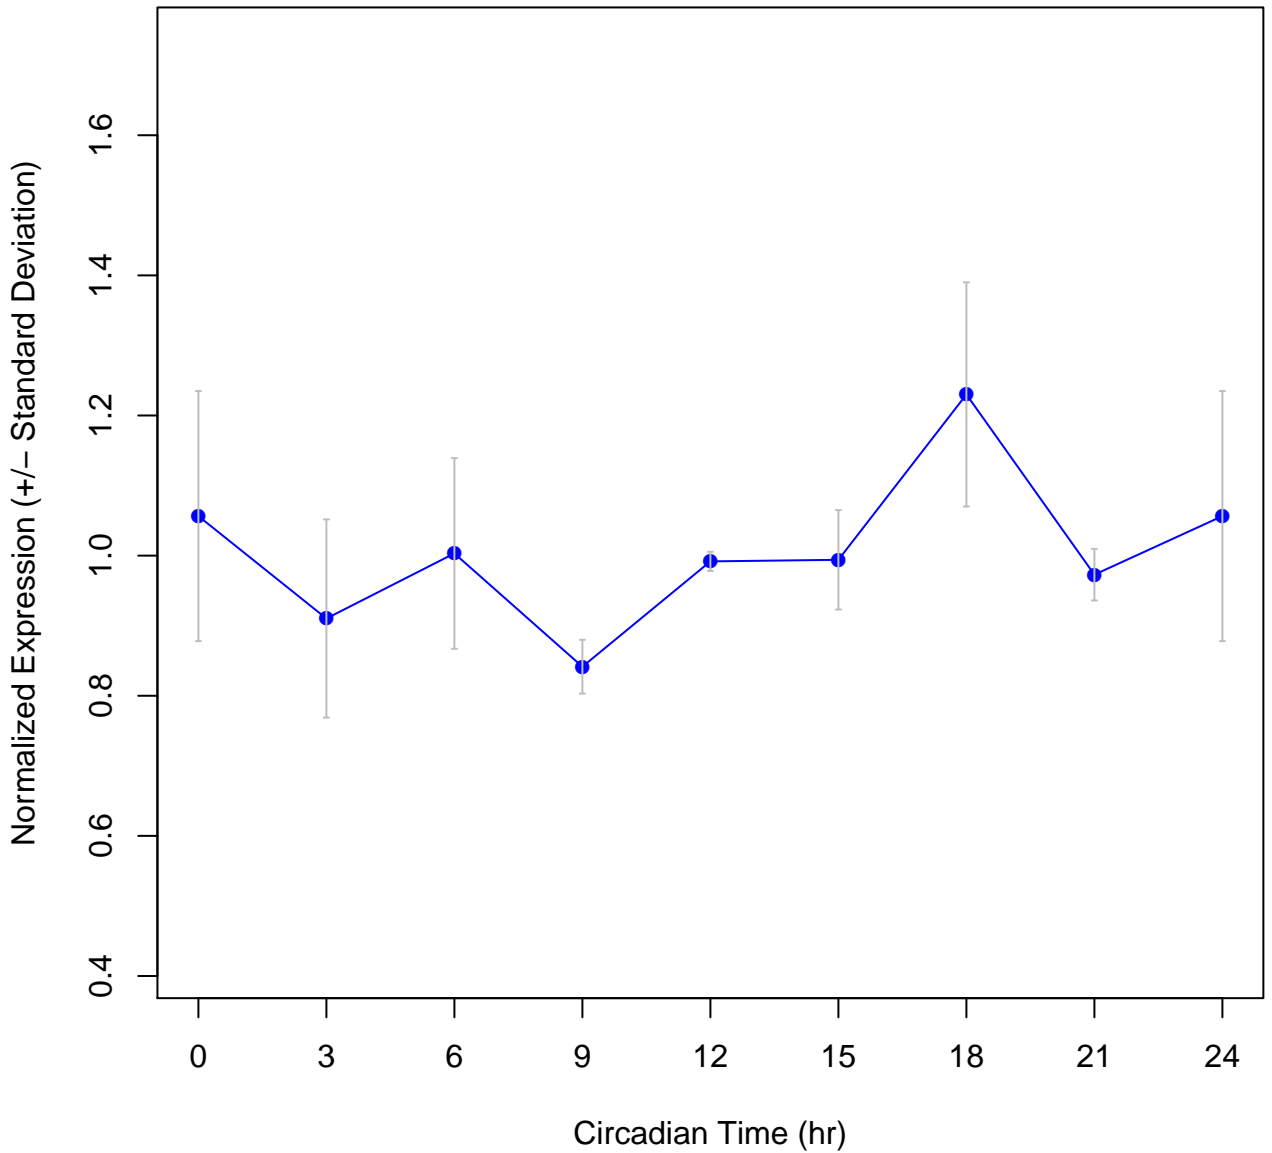

**Supplement Figure 3 adamts2**

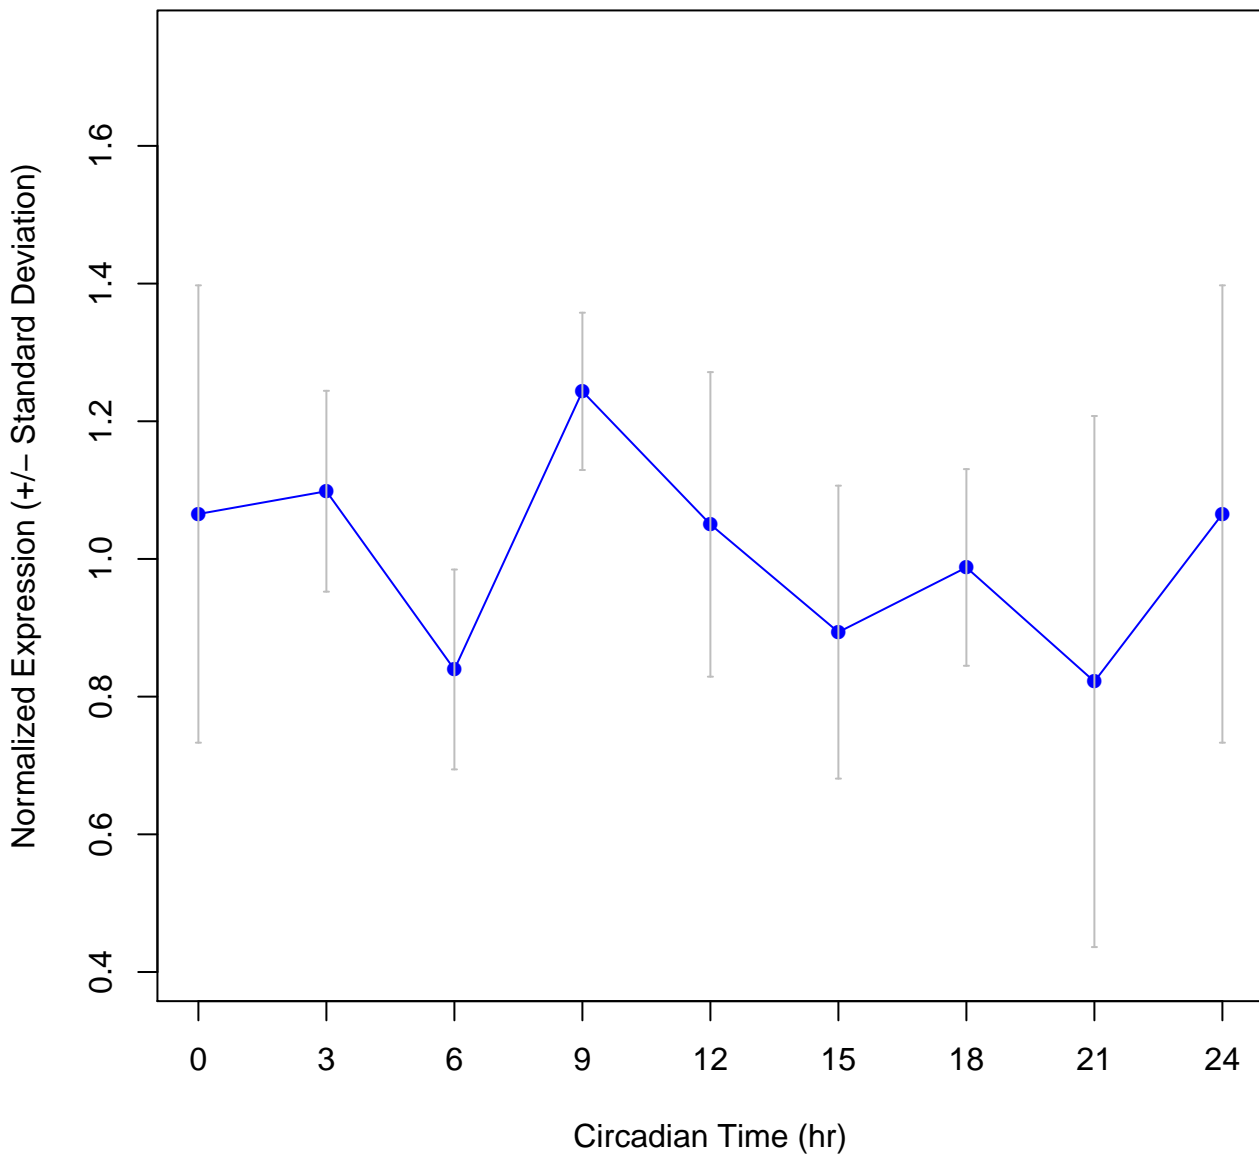

Supplement Figure 3 adcy2

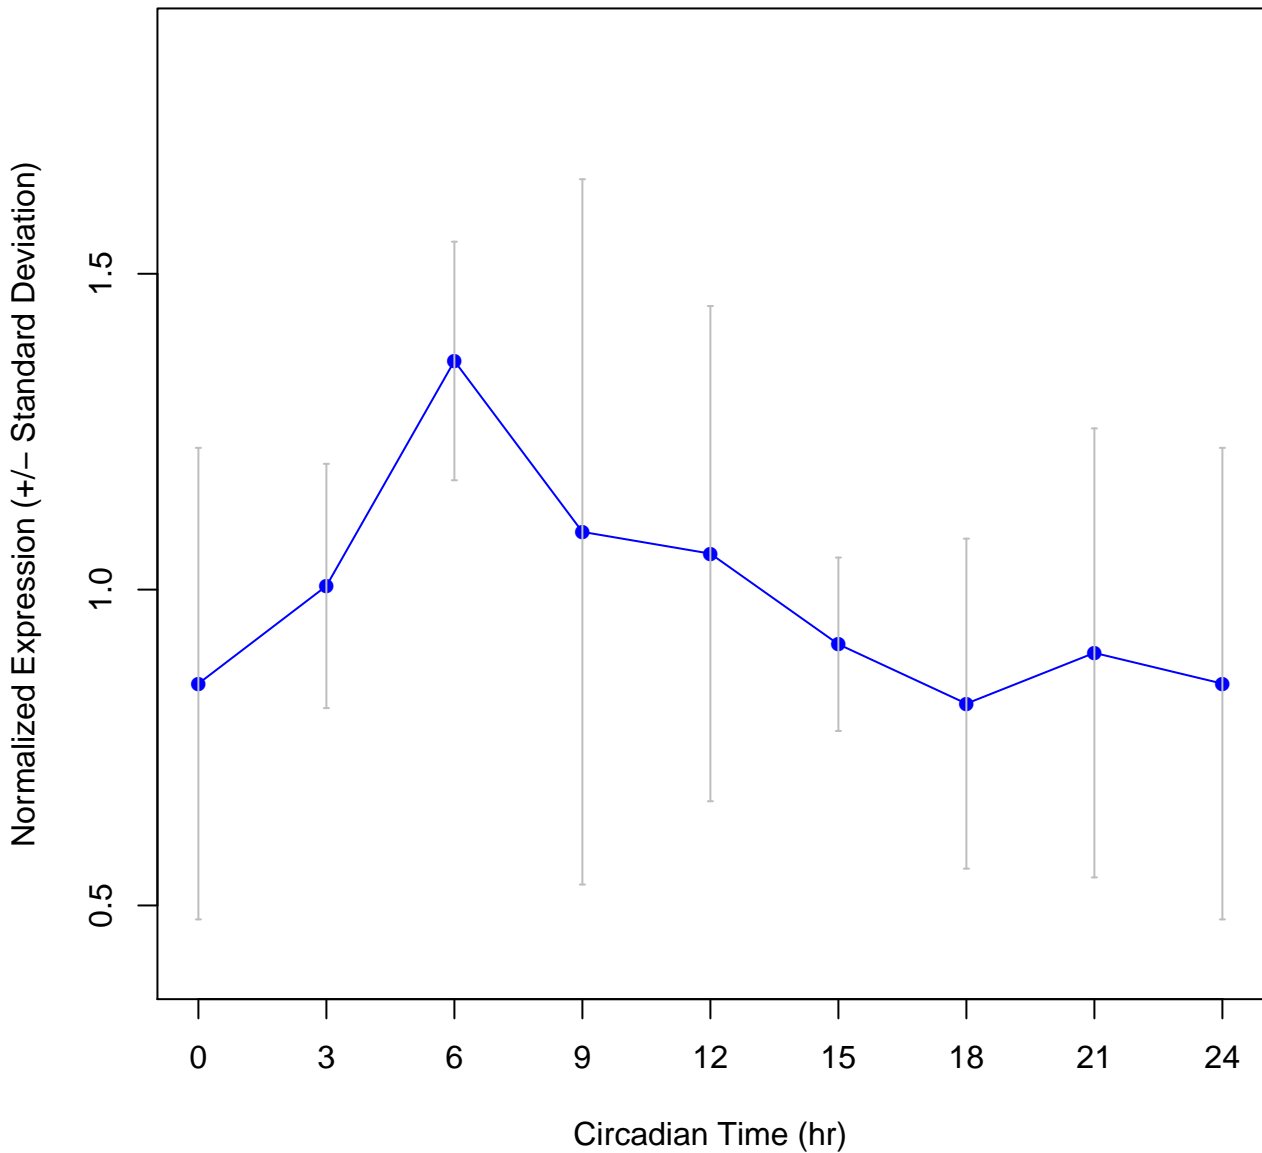

Supplement Figure 3 adrb2

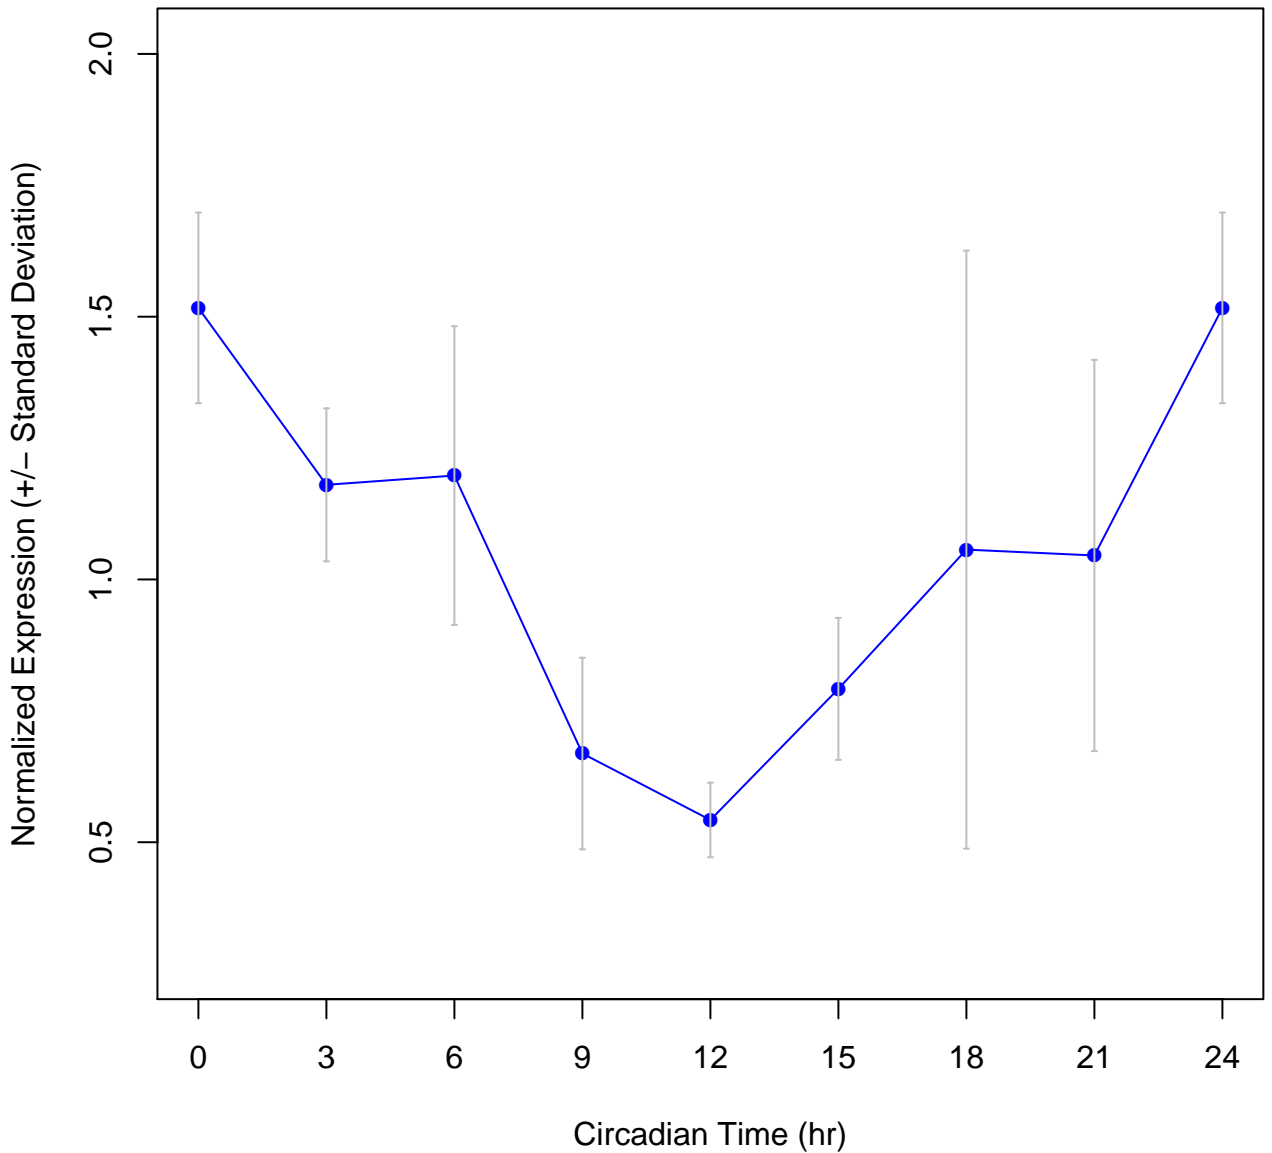

**Supplement Figure 3 akt1**

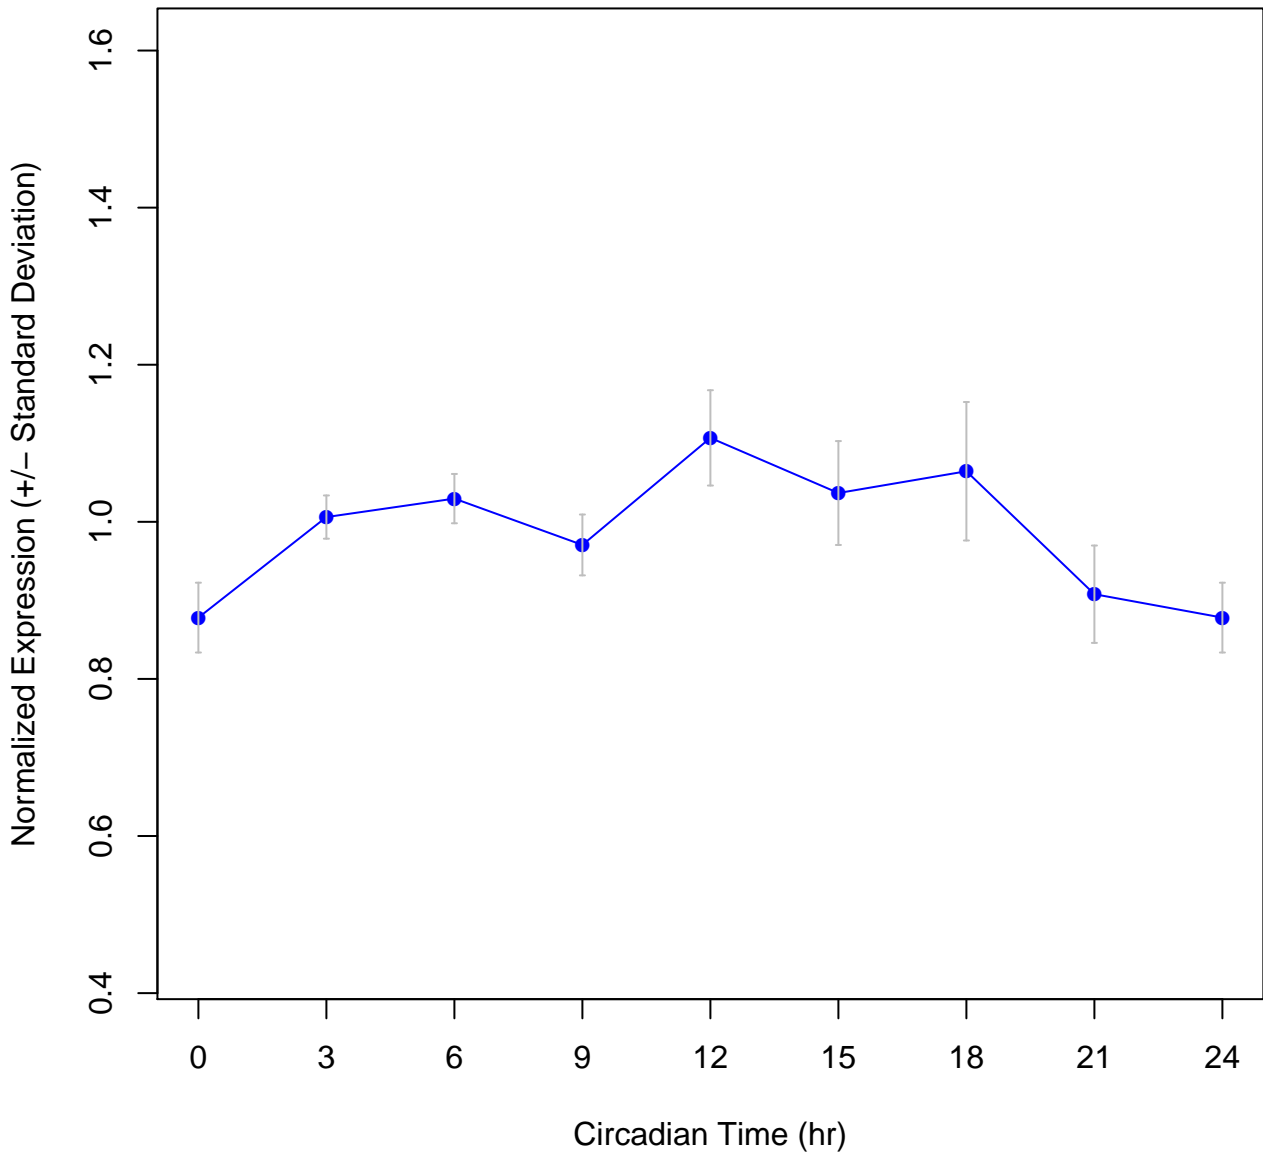



**Supplement Figure 3 akt2**

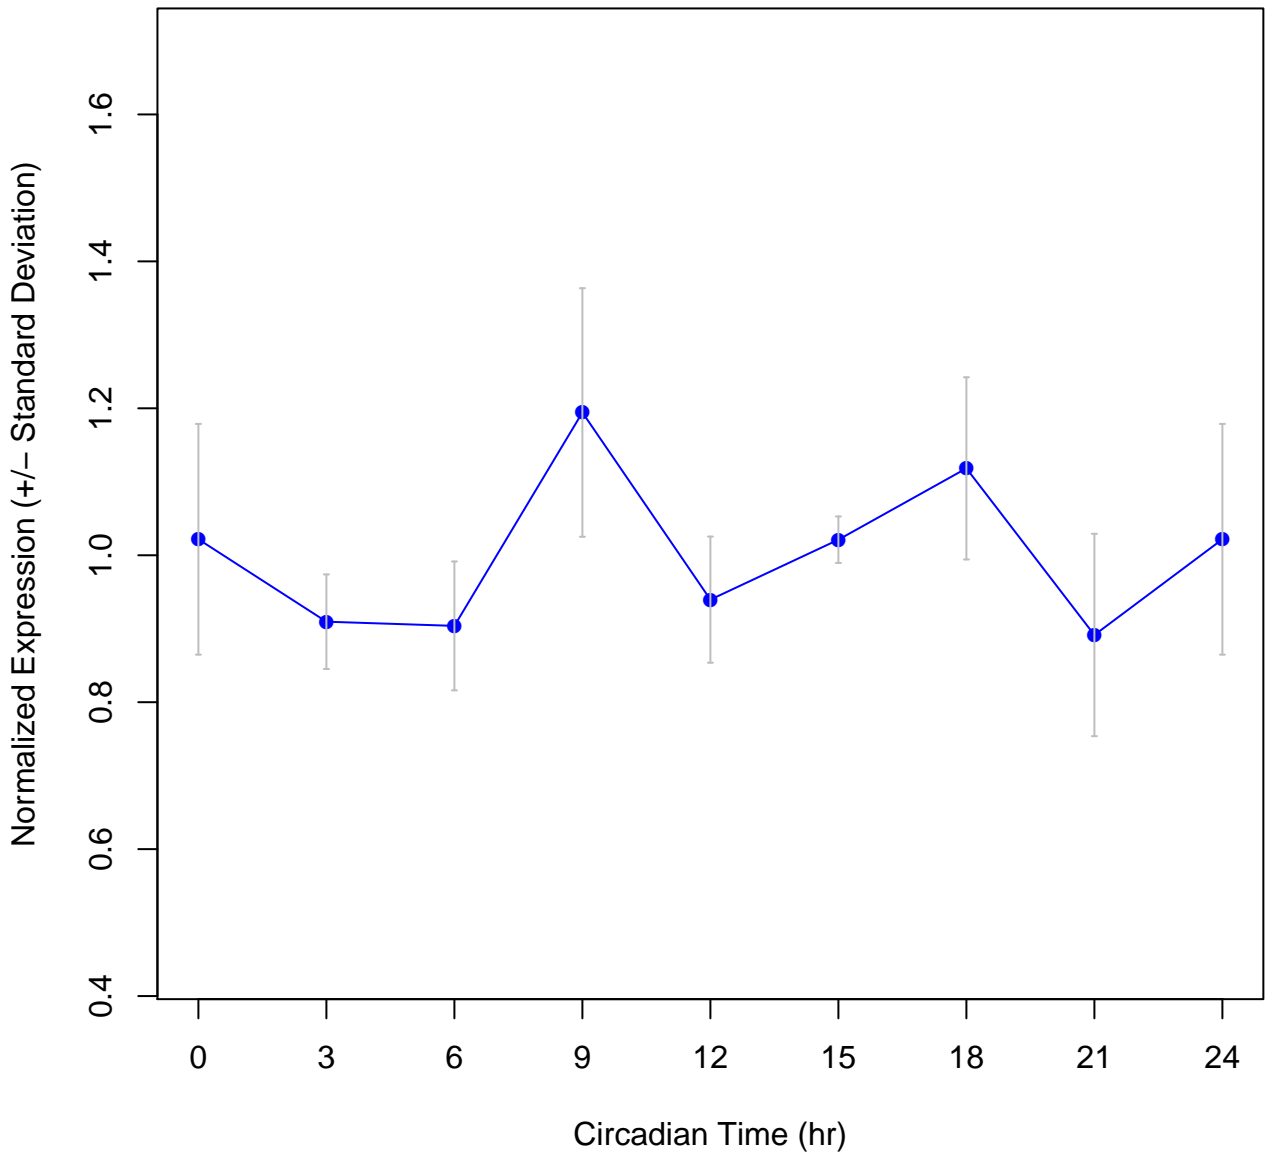

Supplement Figure 3 akt3

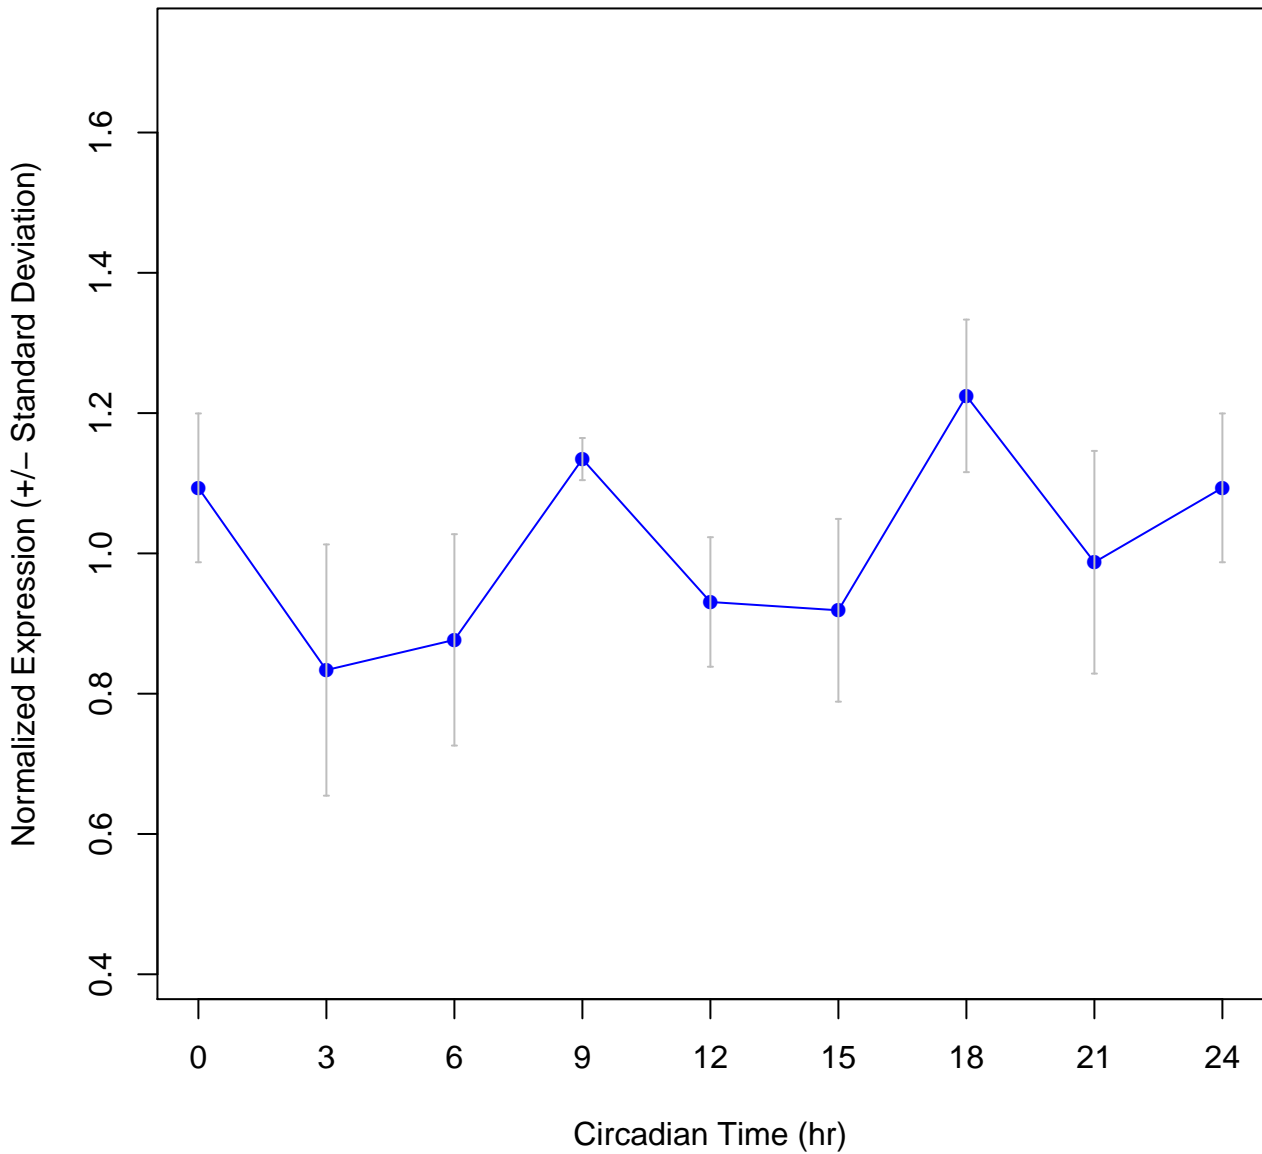

**Supplement Figure 3 apex2**

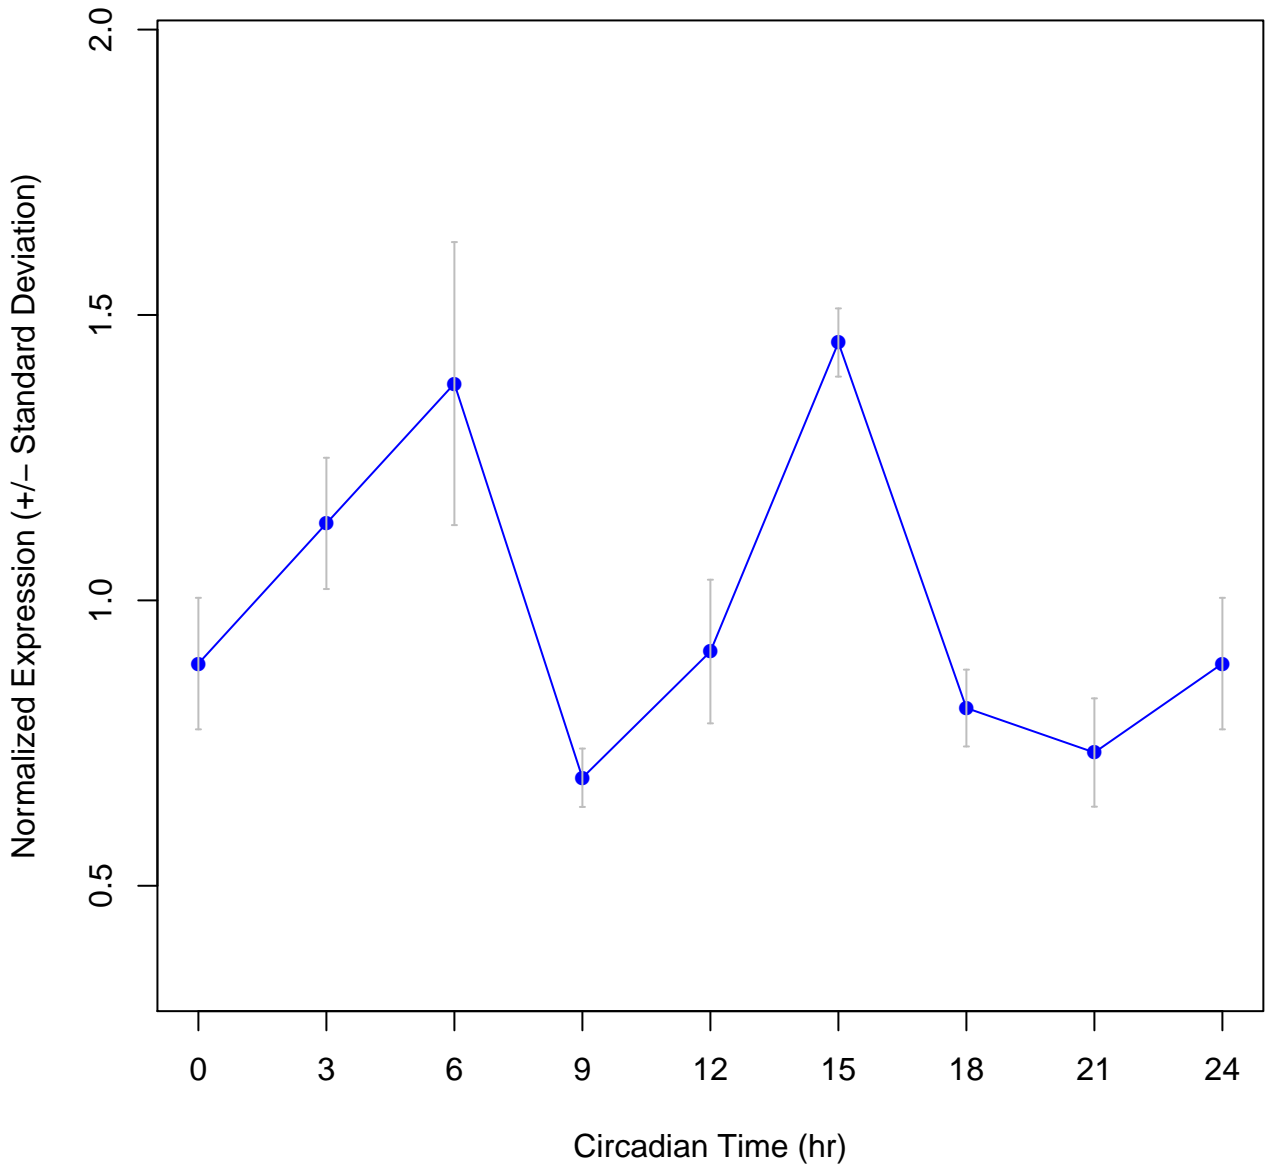

**Supplement Figure 3 arhgap19**

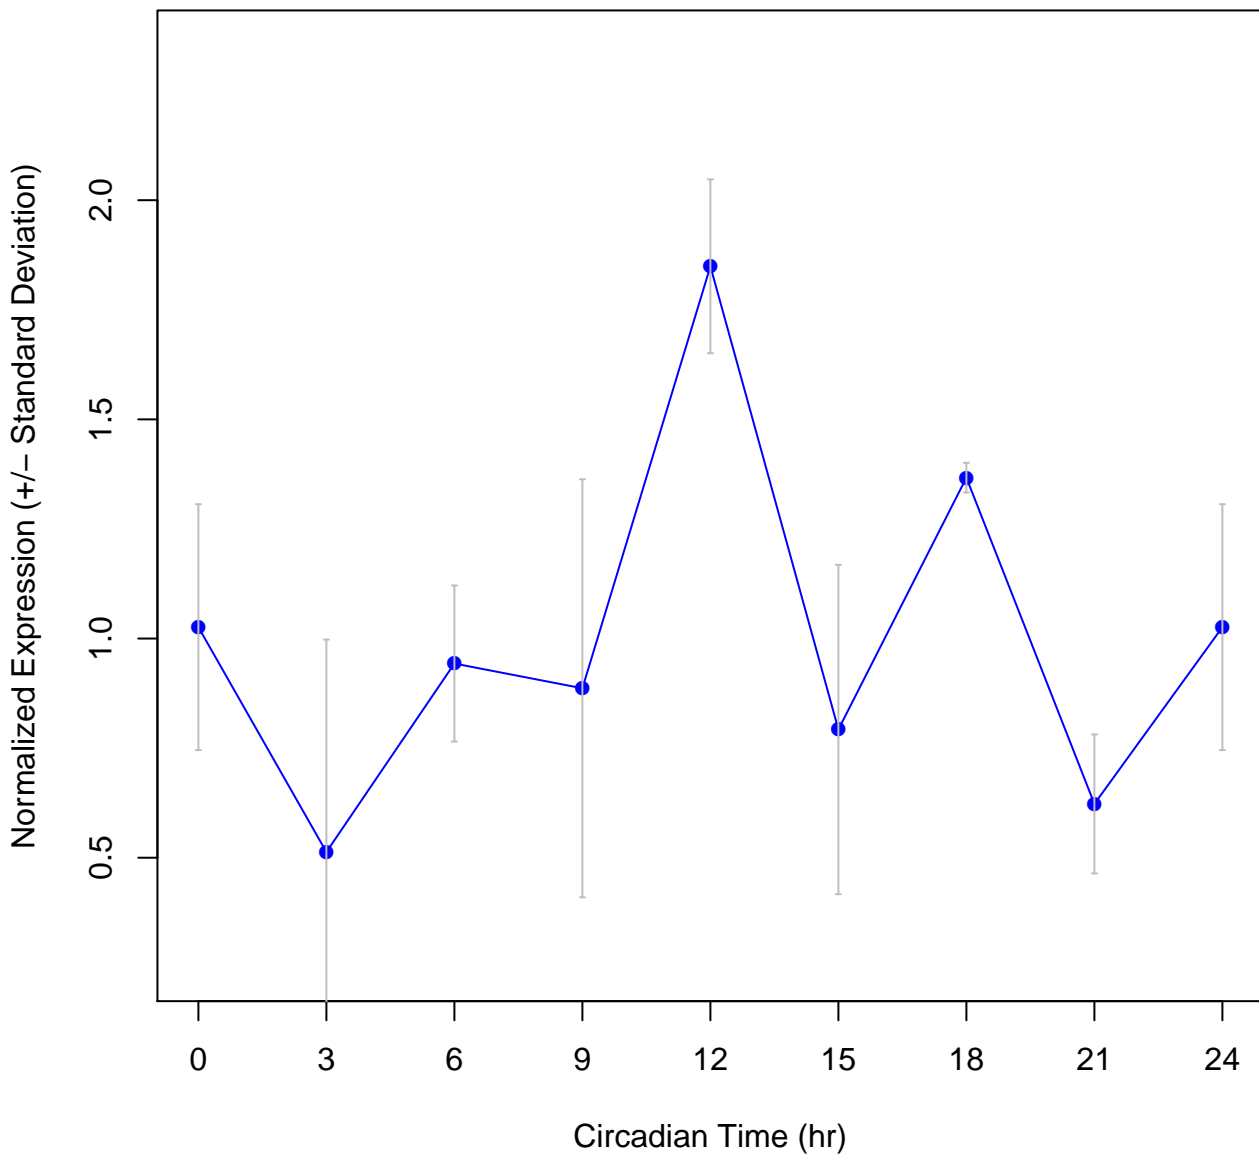

Supplement Figure 3 arid1a

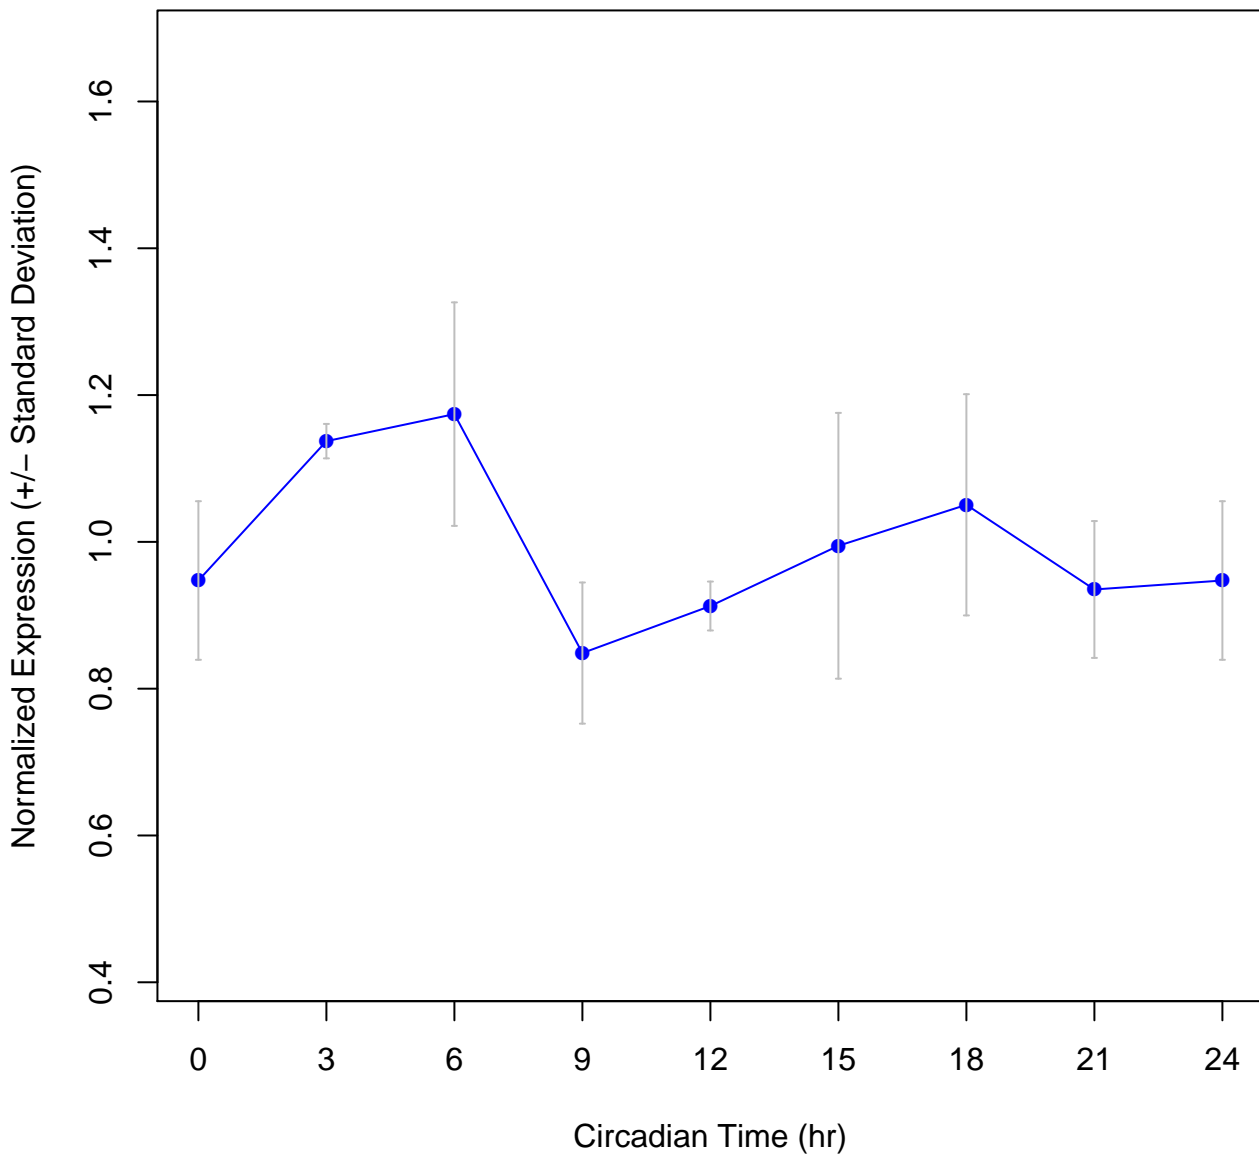

**Supplement Figure 3 ash2l**

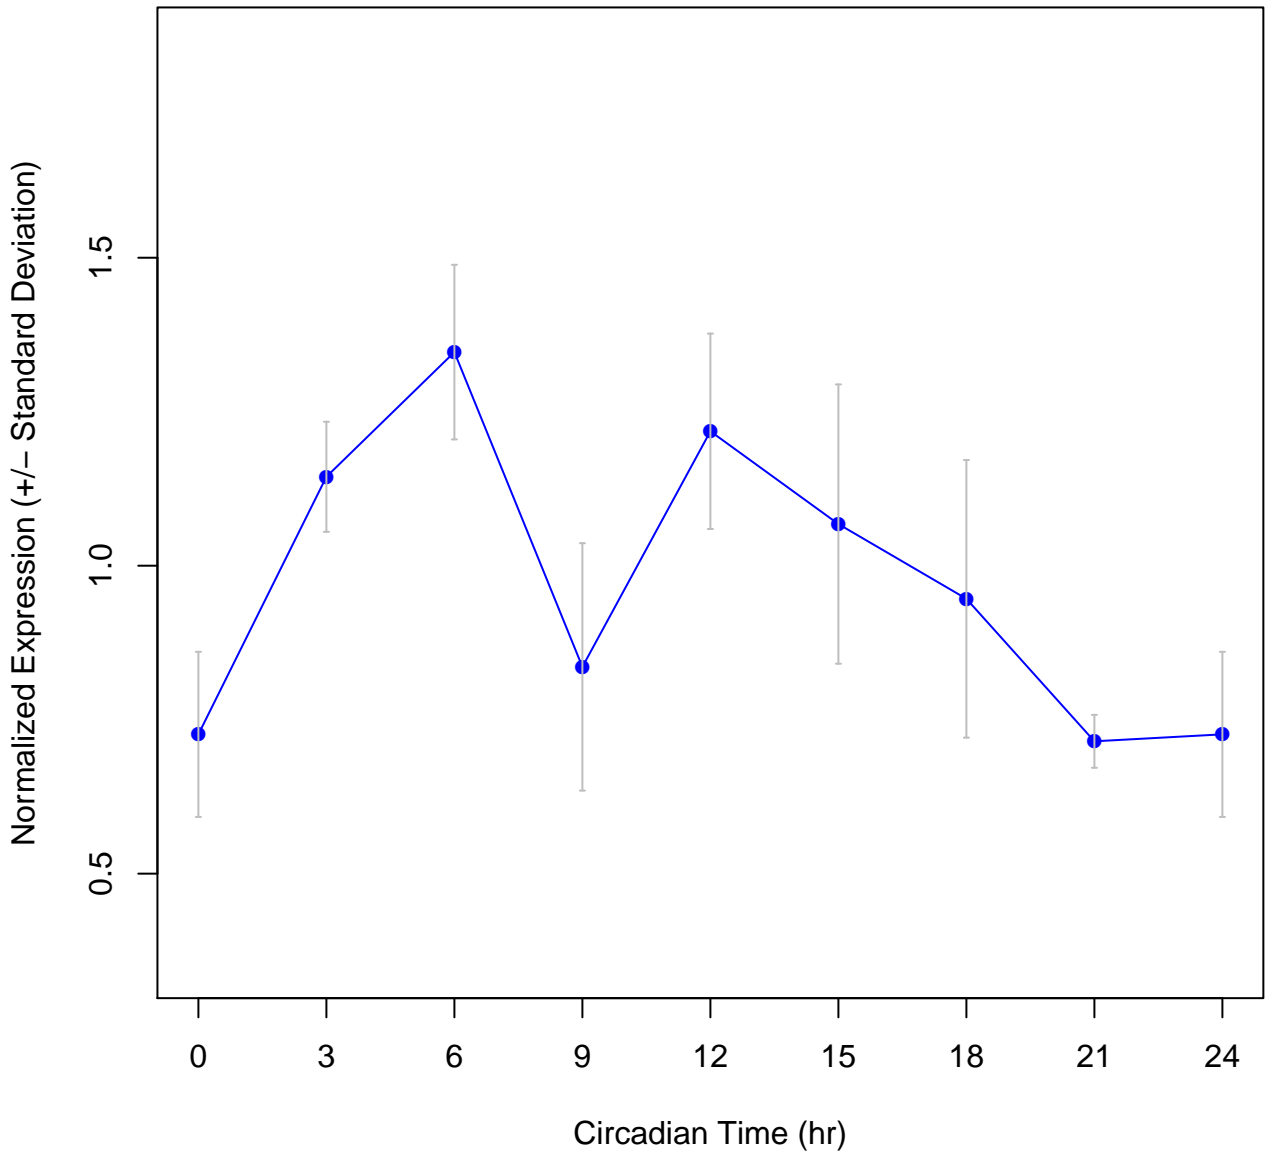

### Supplement Figure 3 asic1

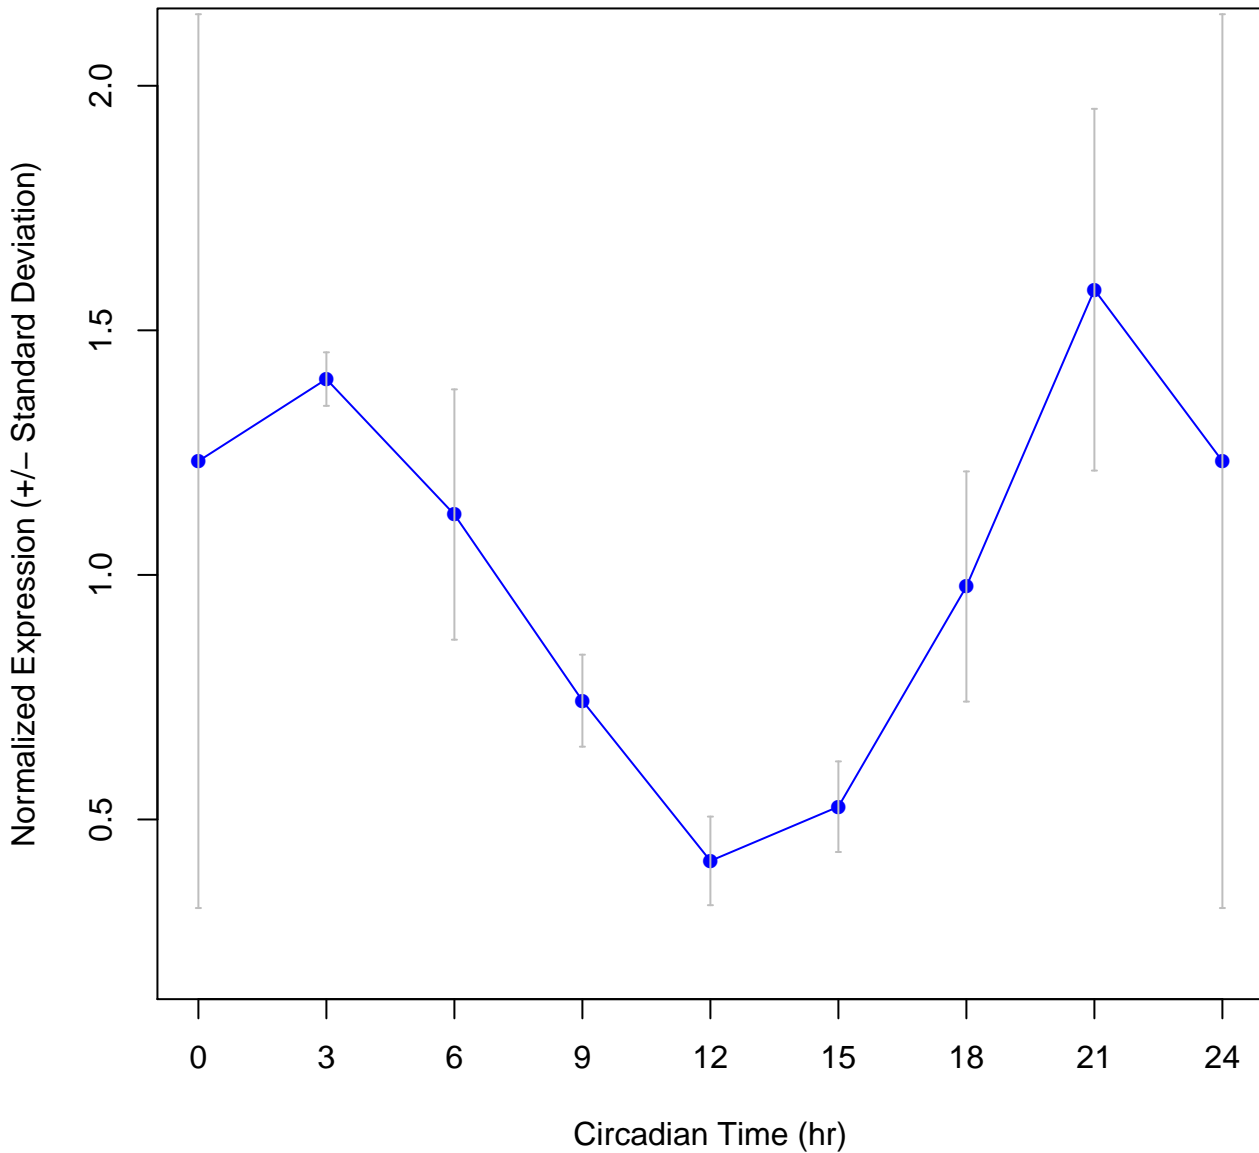

Supplement Figure 3 atm

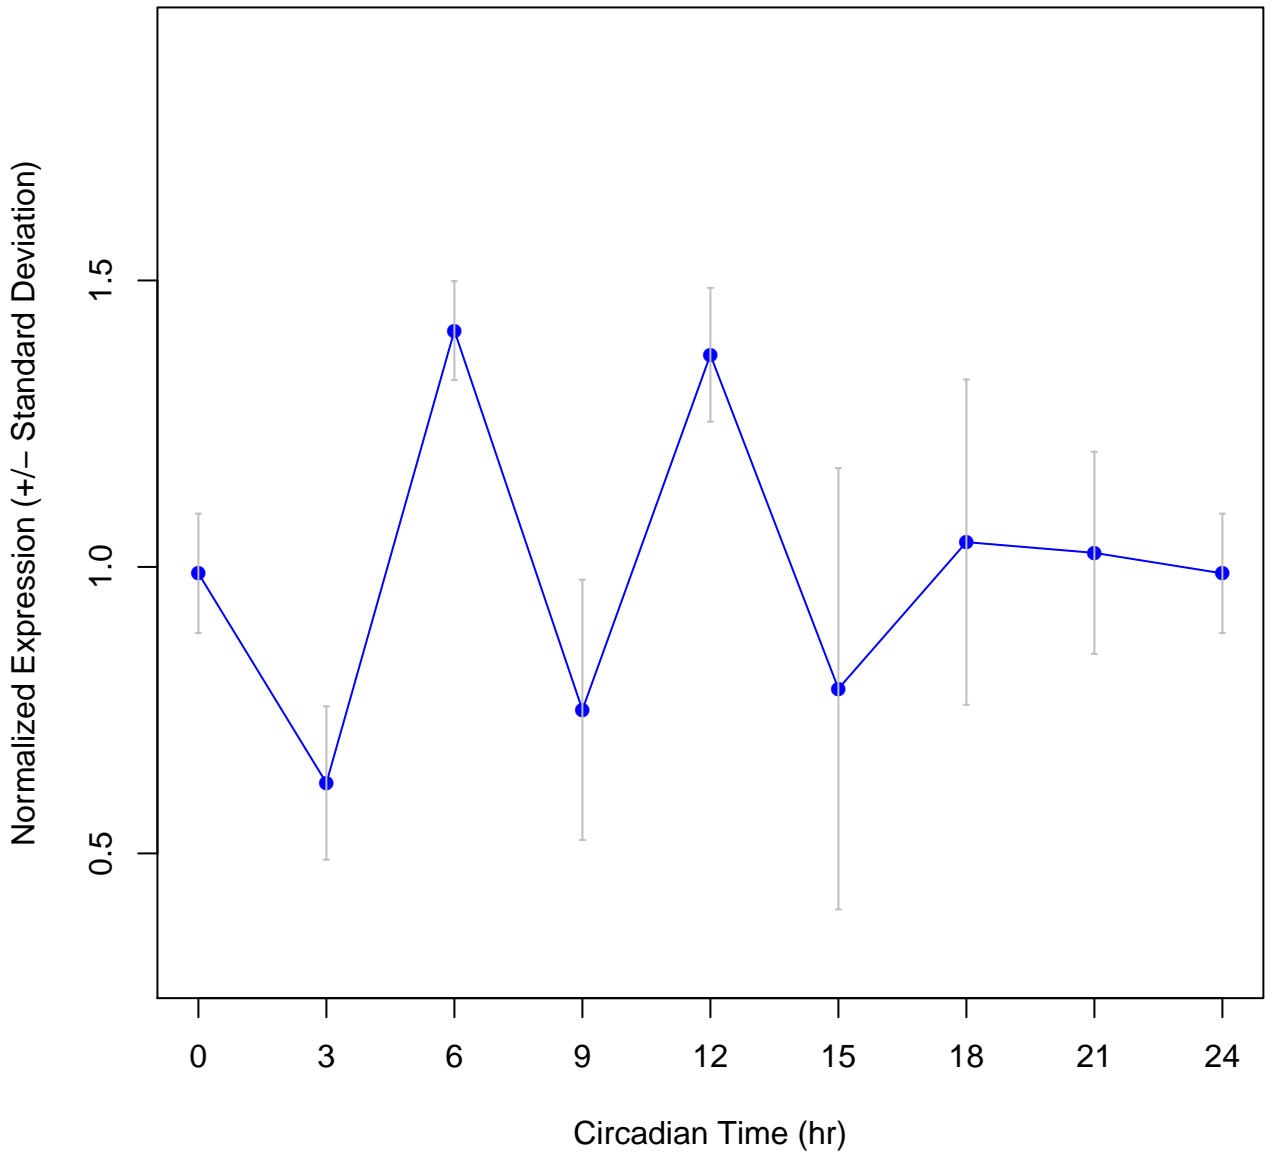



Supplement Figure 3 atp2a1

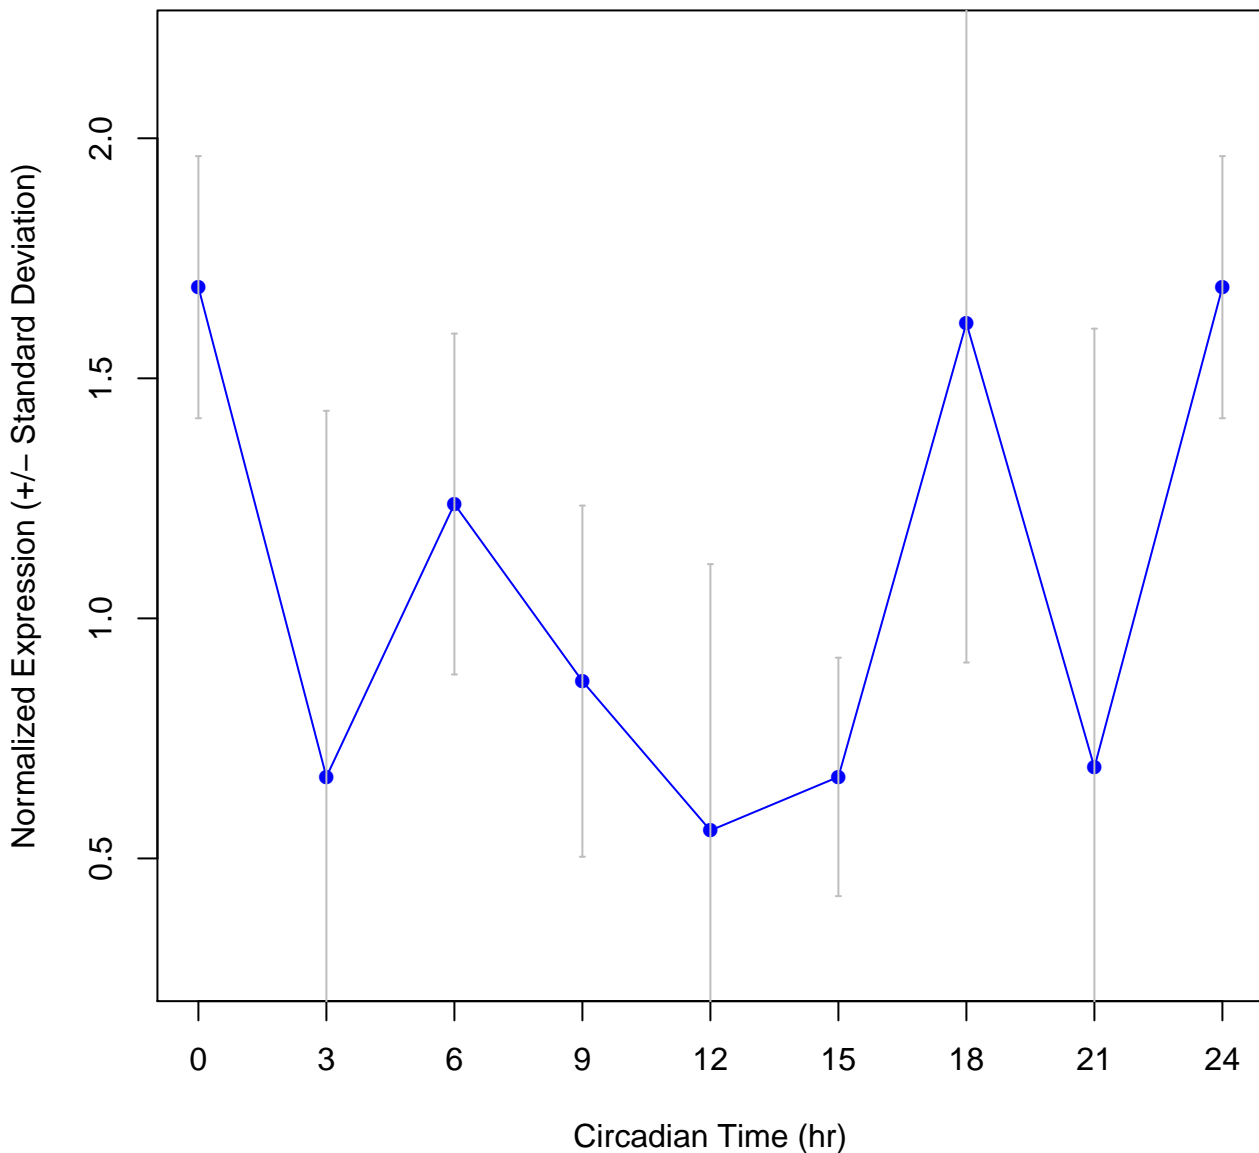

**Supplement Figure 3 aurka**

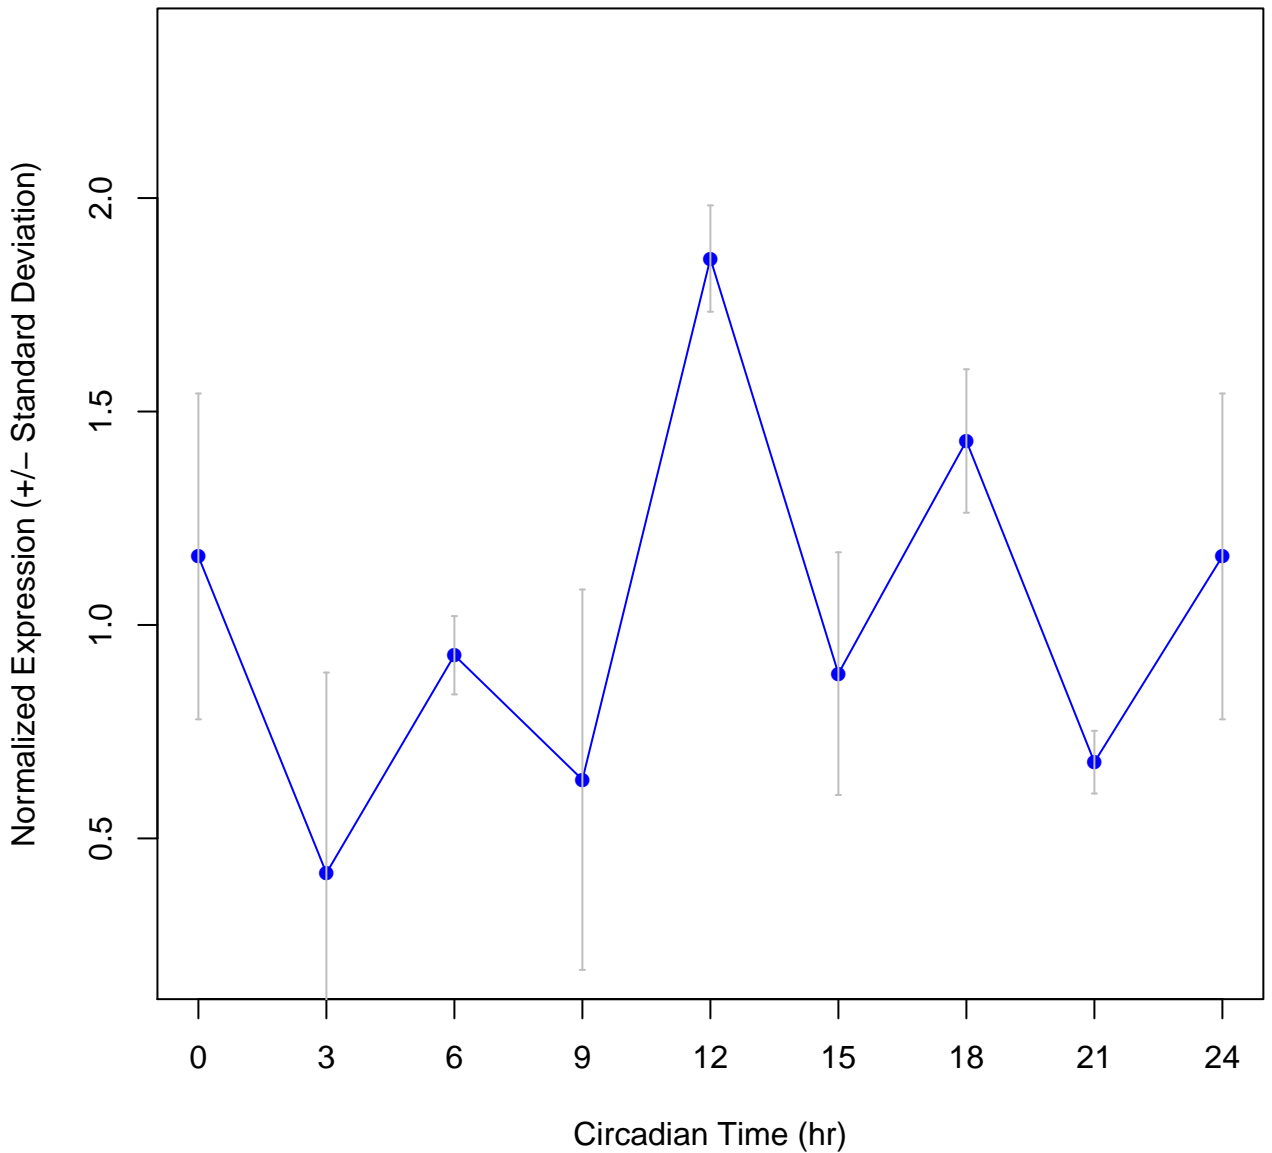

Supplement Figure 3 bcl1

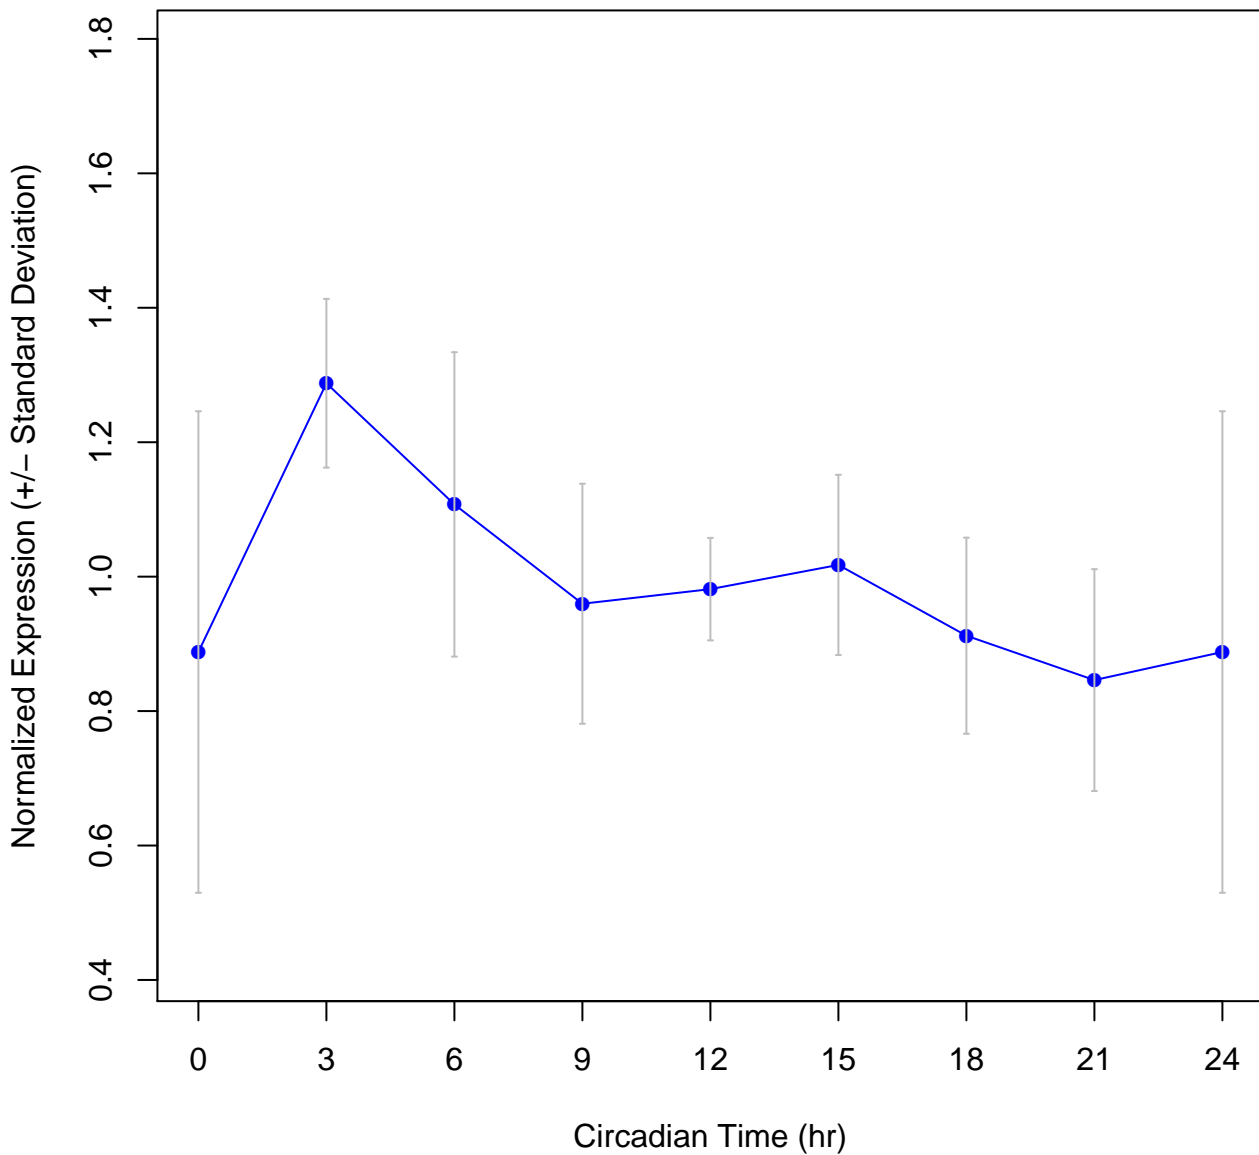

Supplement Figure 3 bcl2

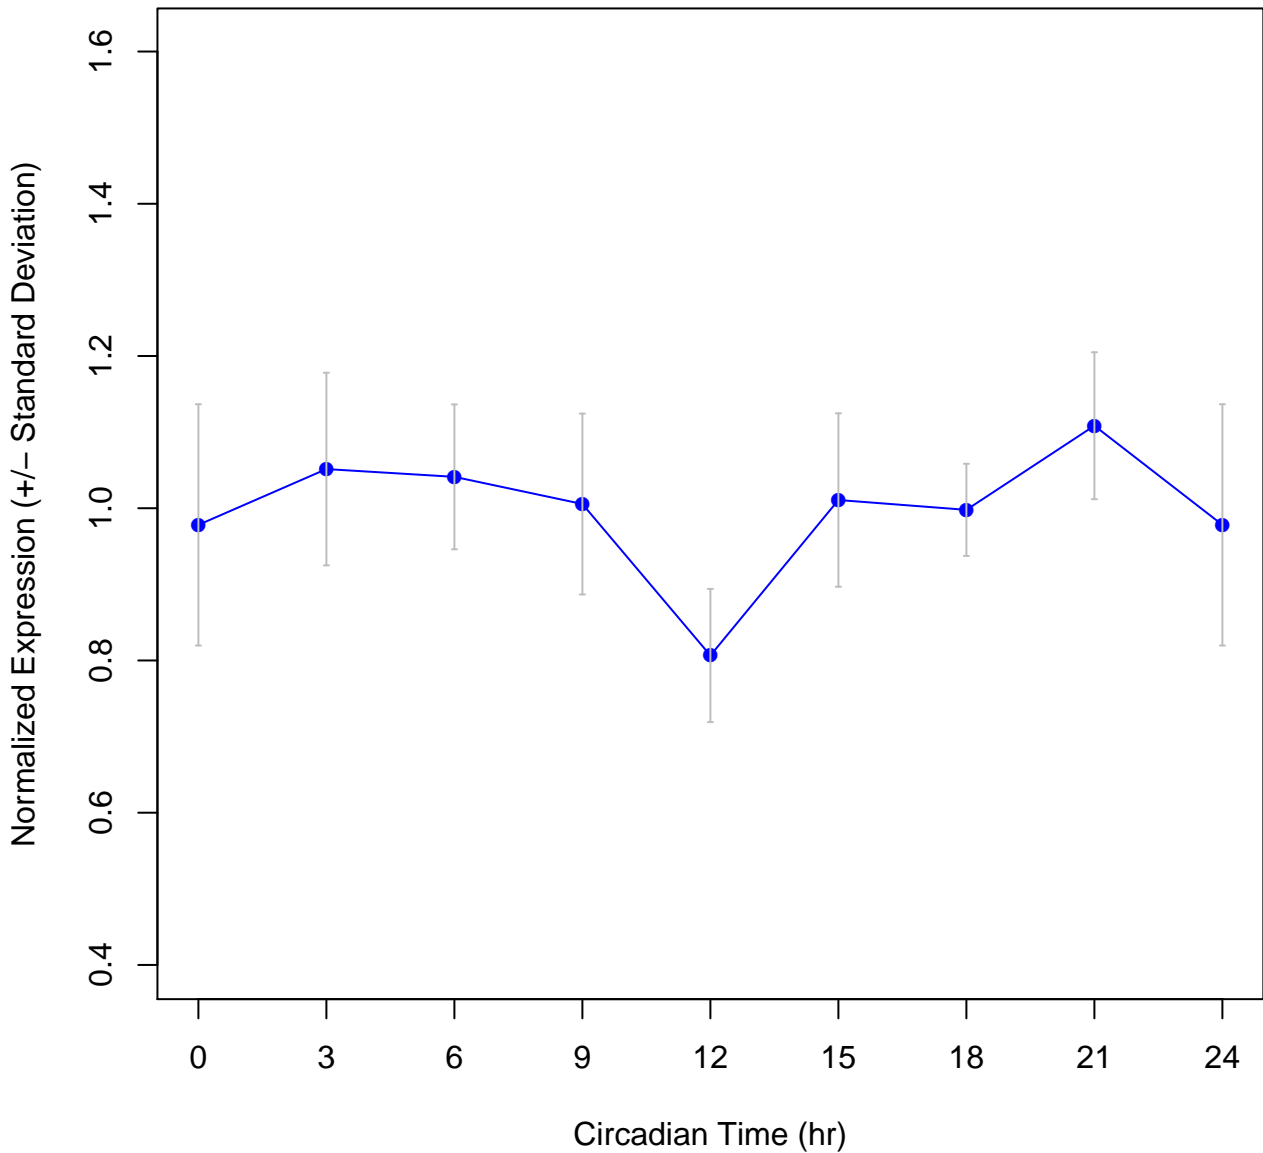

Supplement Figure 3 bhlhe40

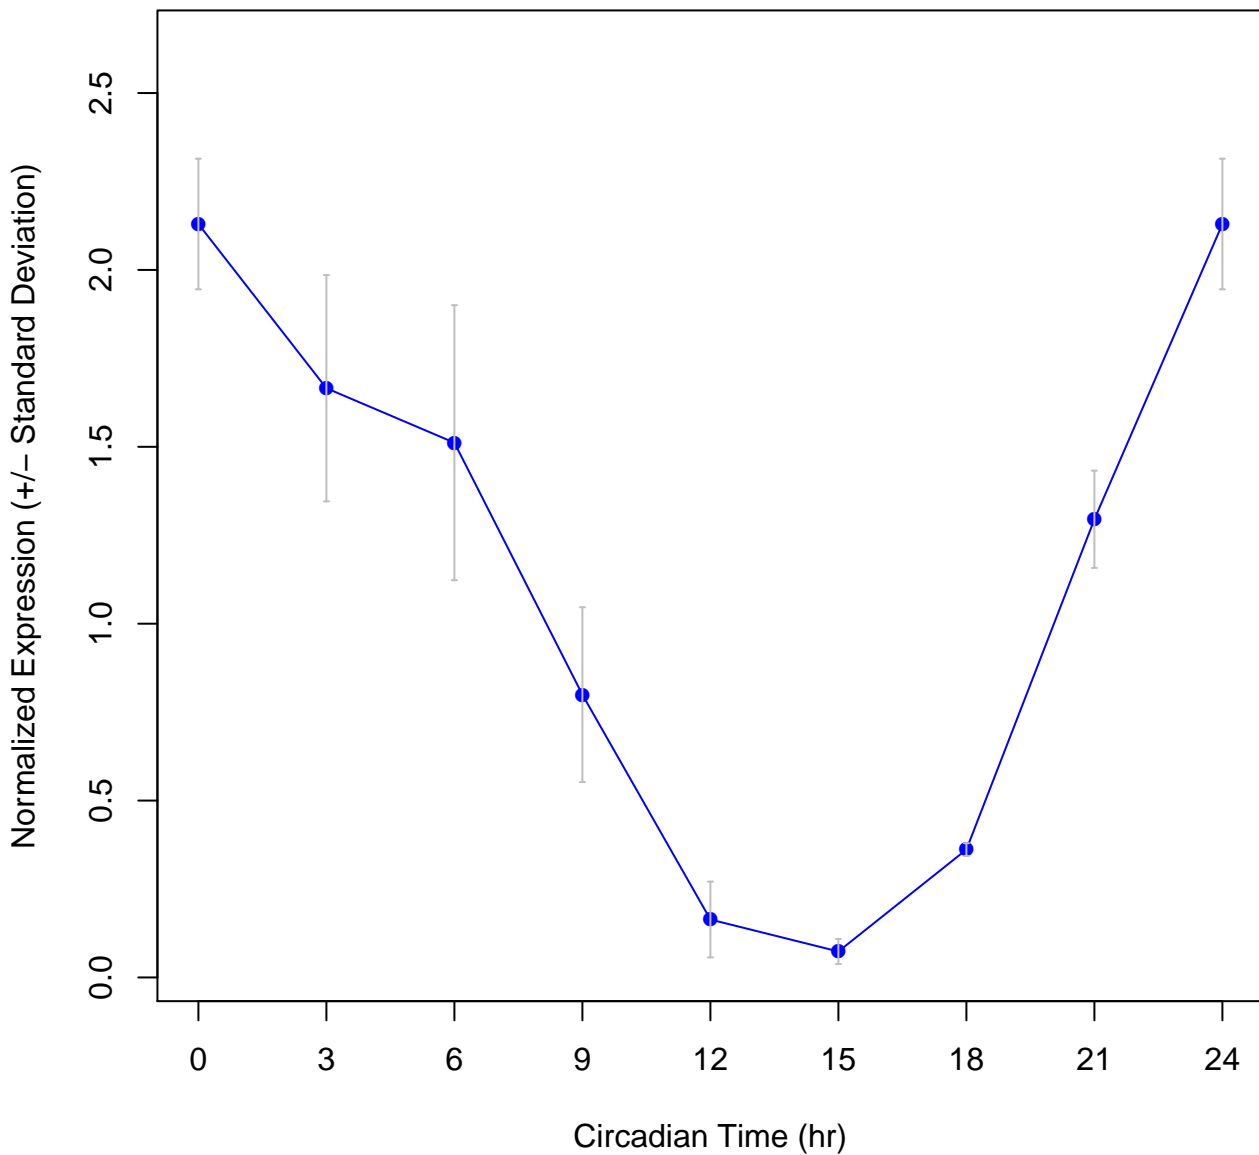

**Supplement Figure 3 bmal1**

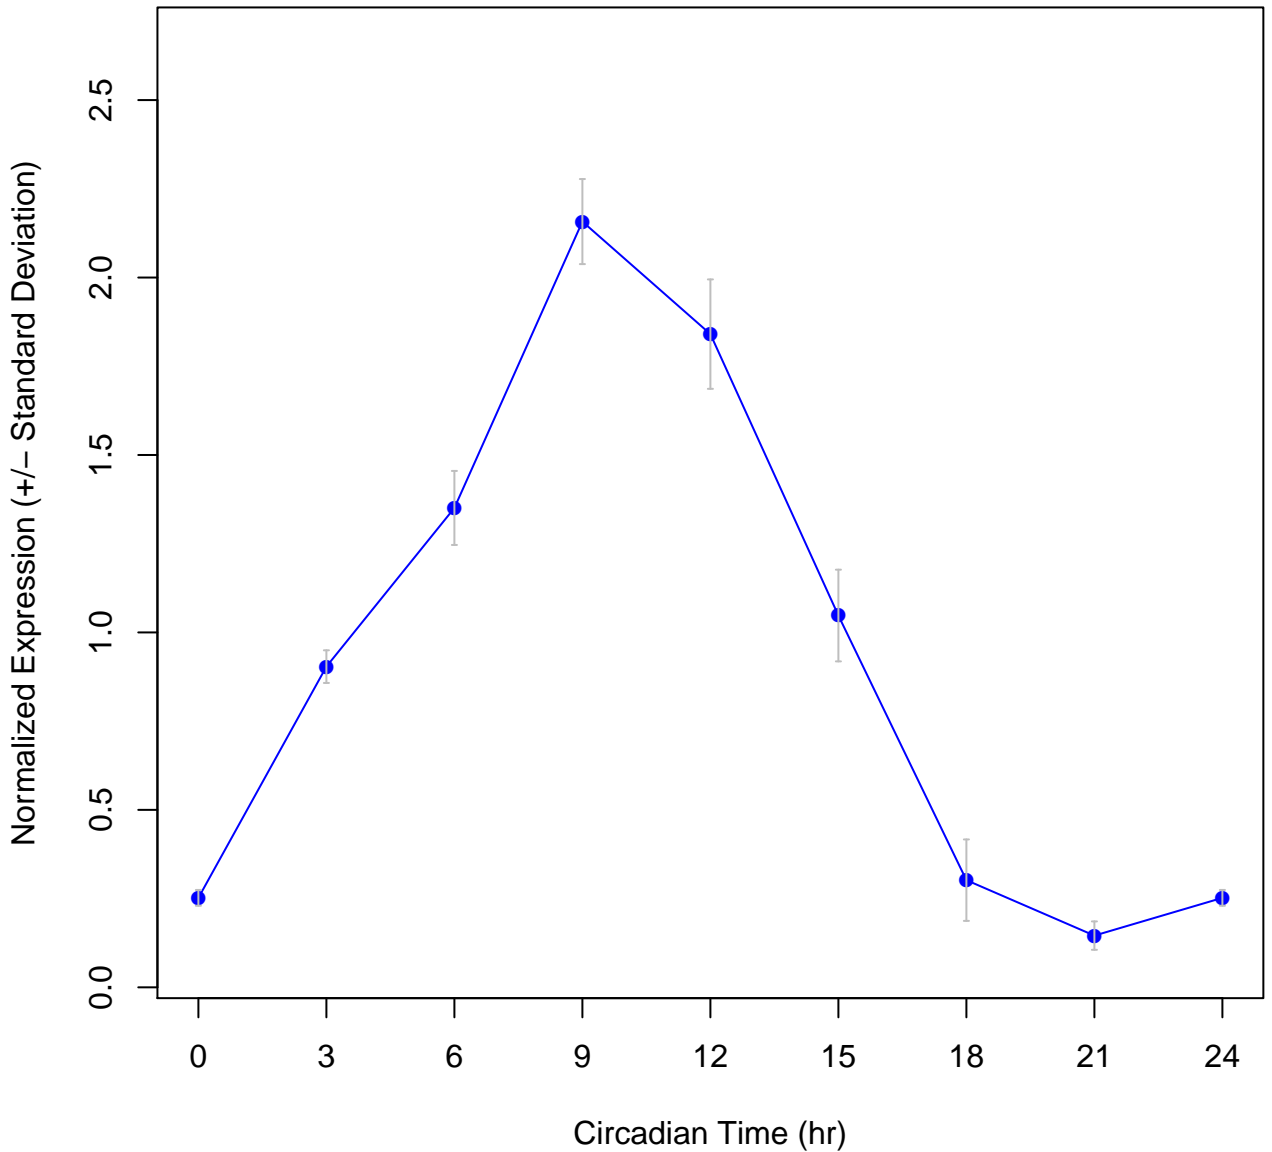

**Supplement Figure 3 bmp7**

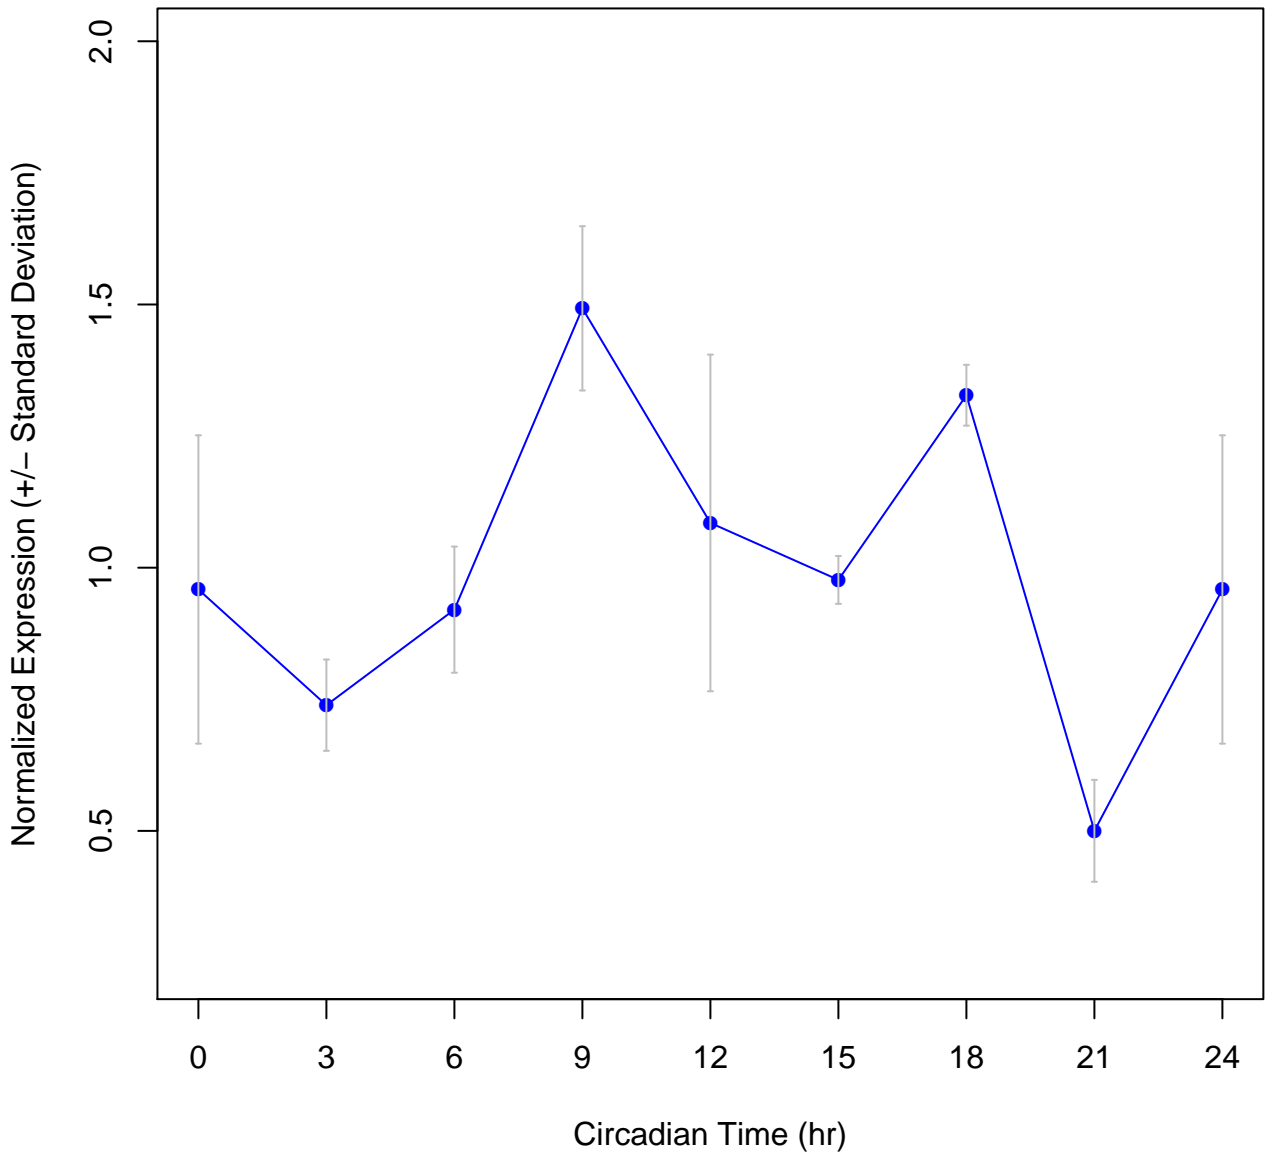

Supplement Figure 3 bmpr1b

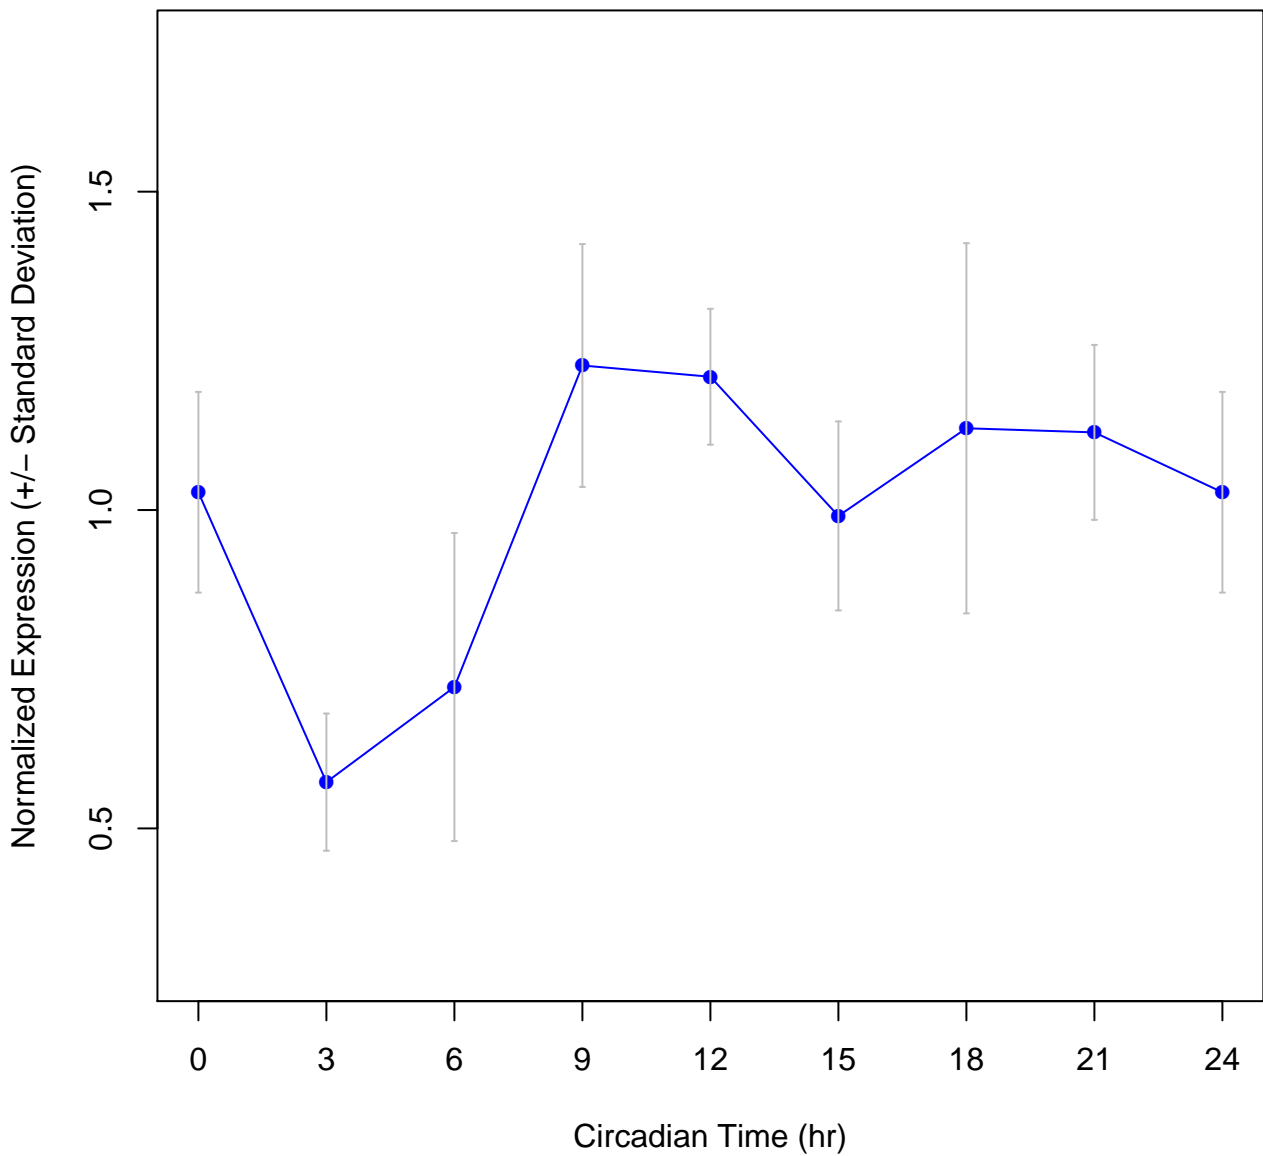



**Supplement Figure 3 bora**

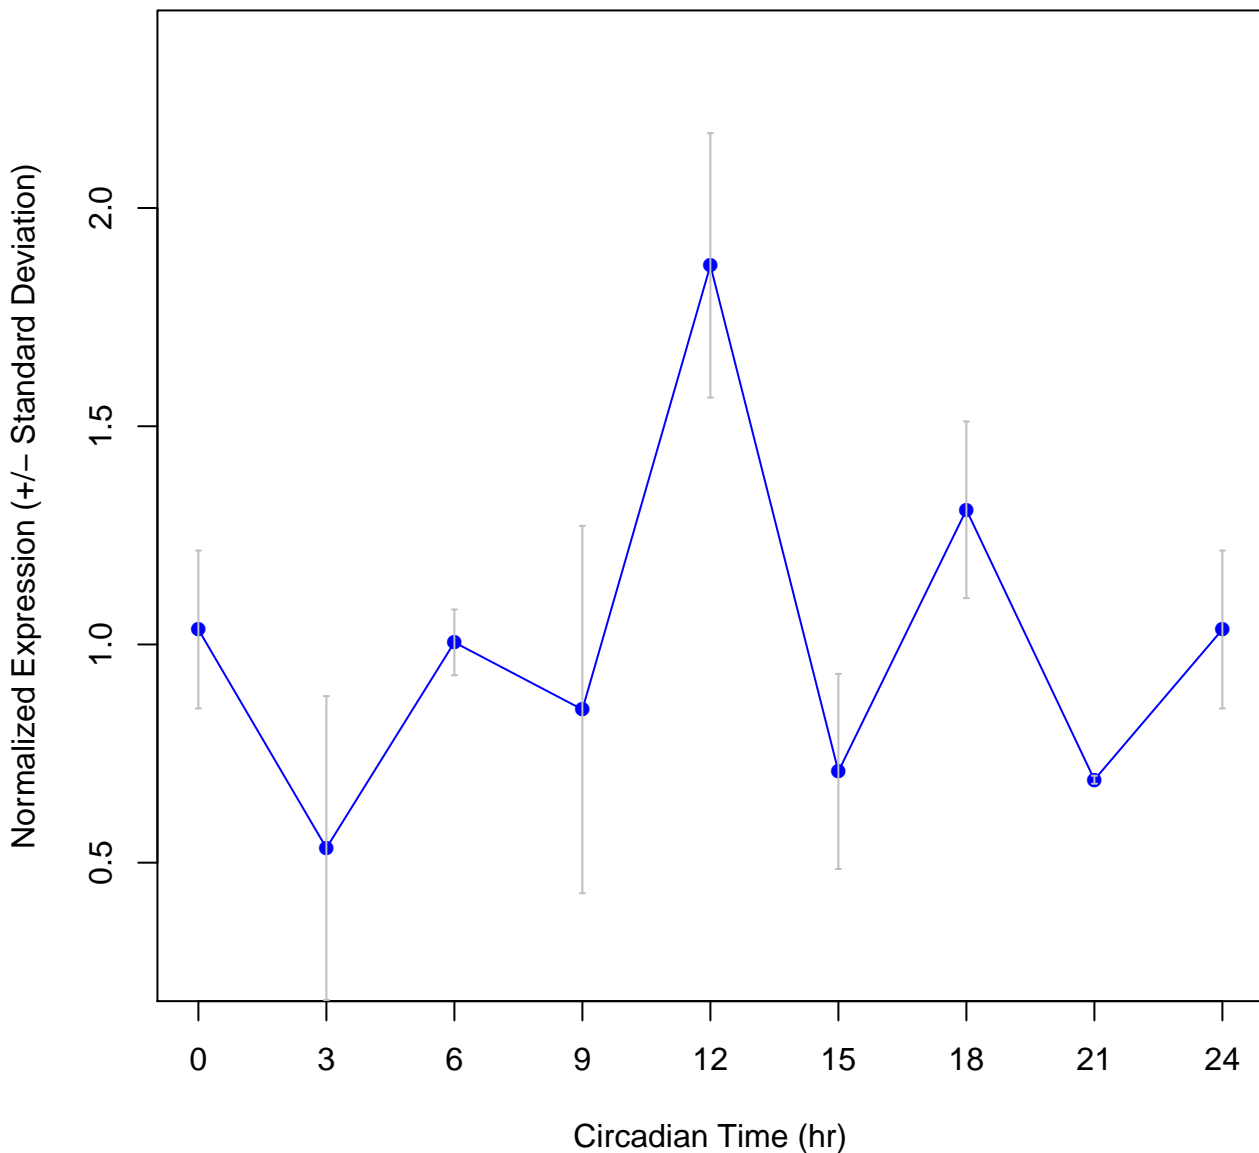

**Supplement Figure 3 brca2**

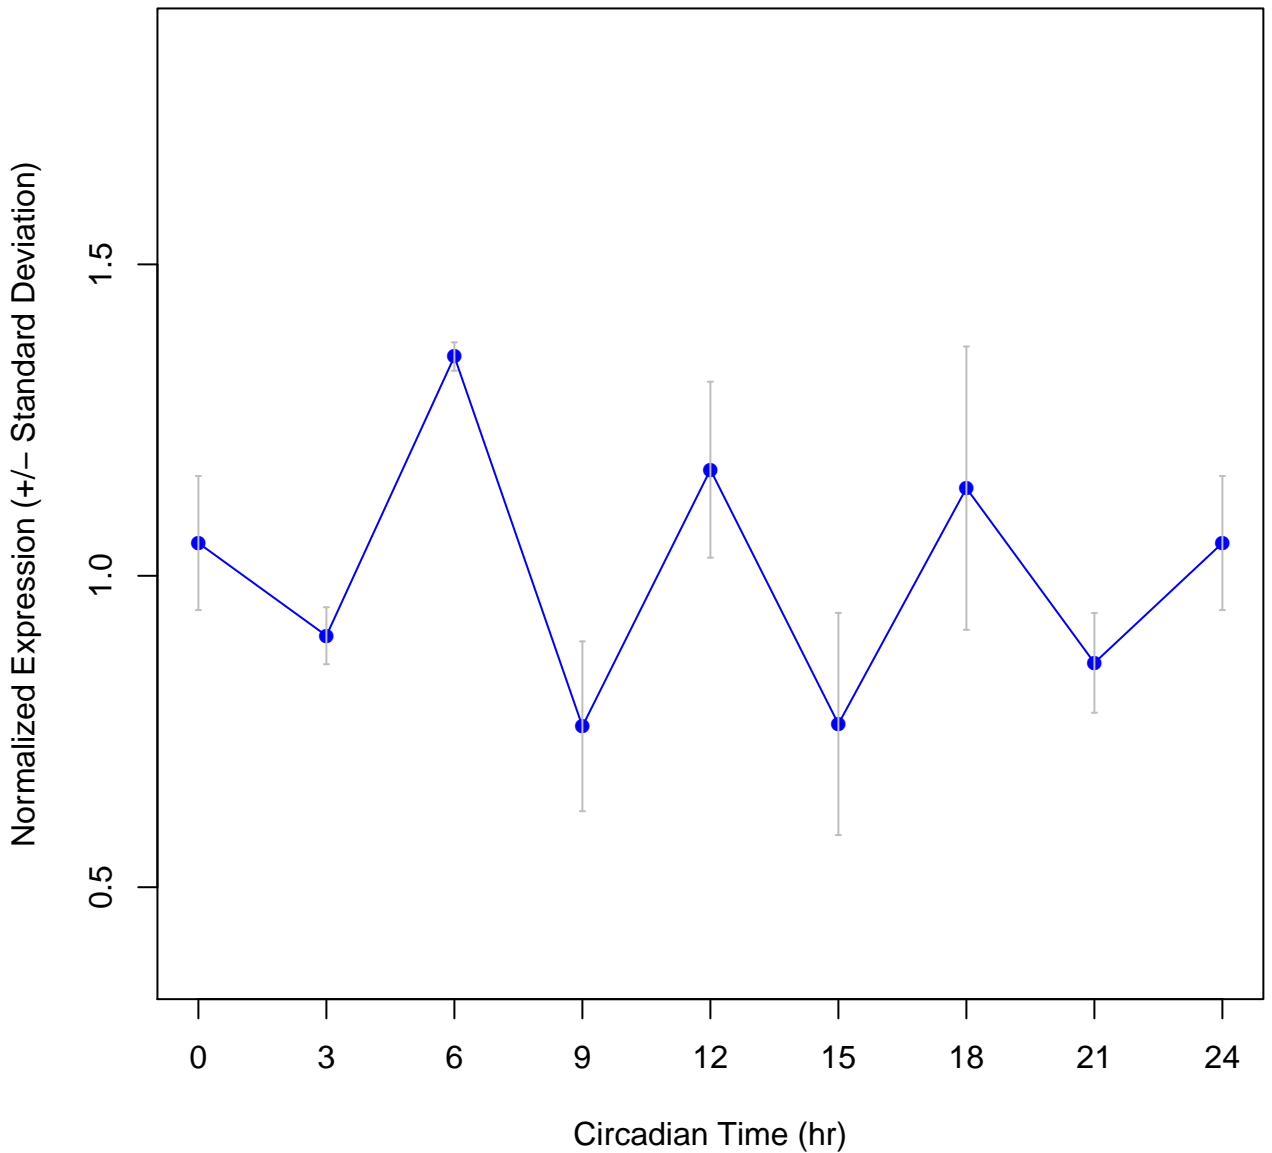

Supplement Figure 3 camk1g

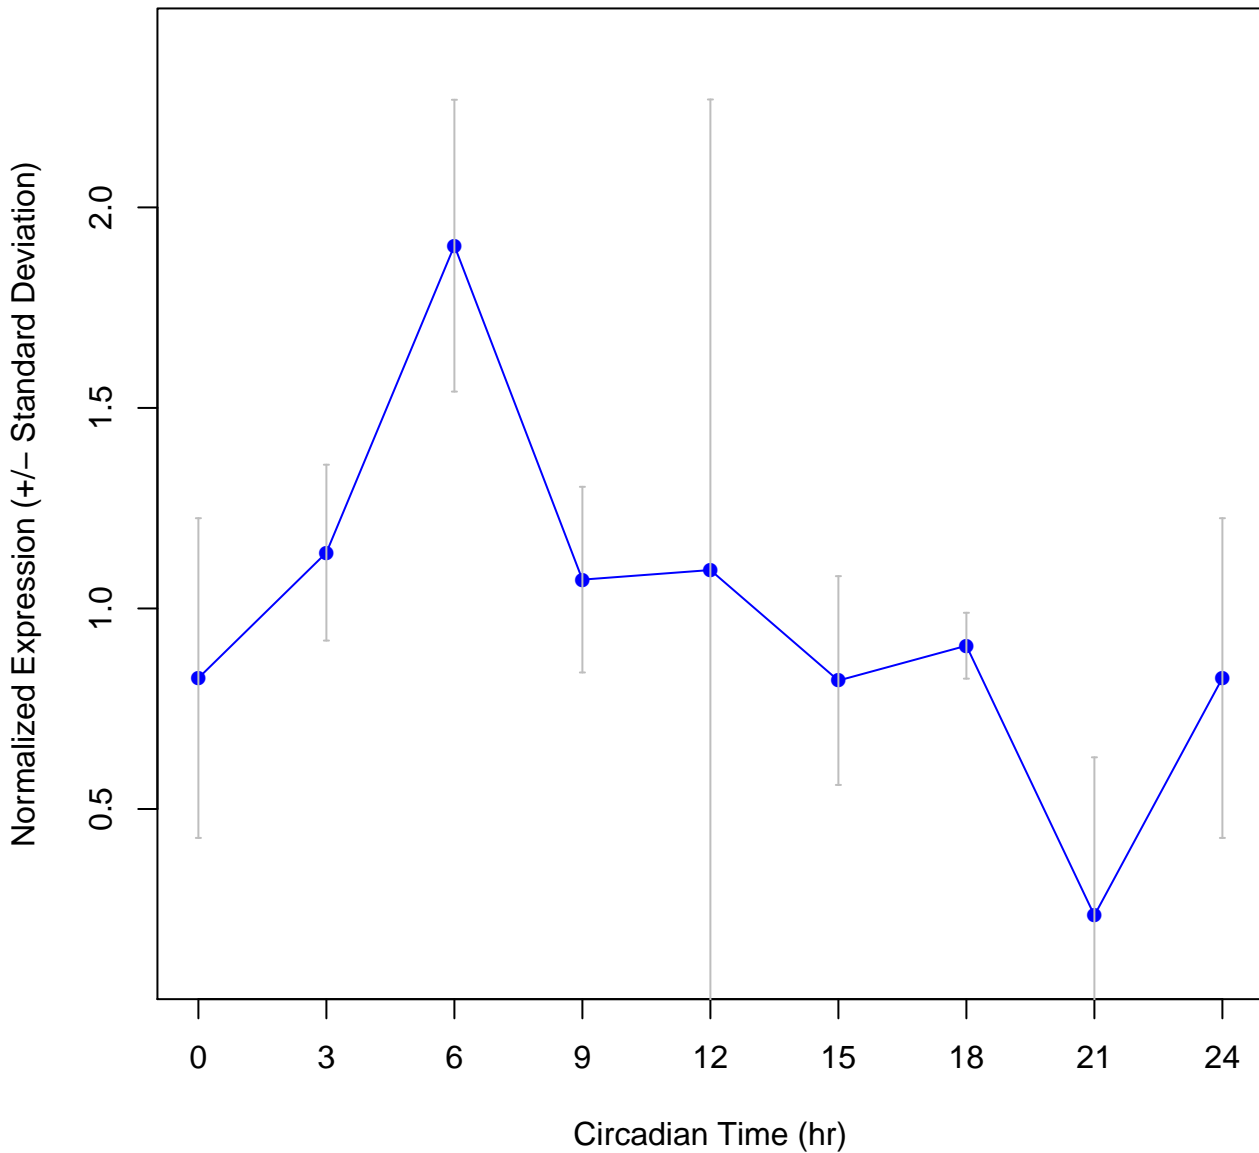

Supplement Figure 3 camk2a

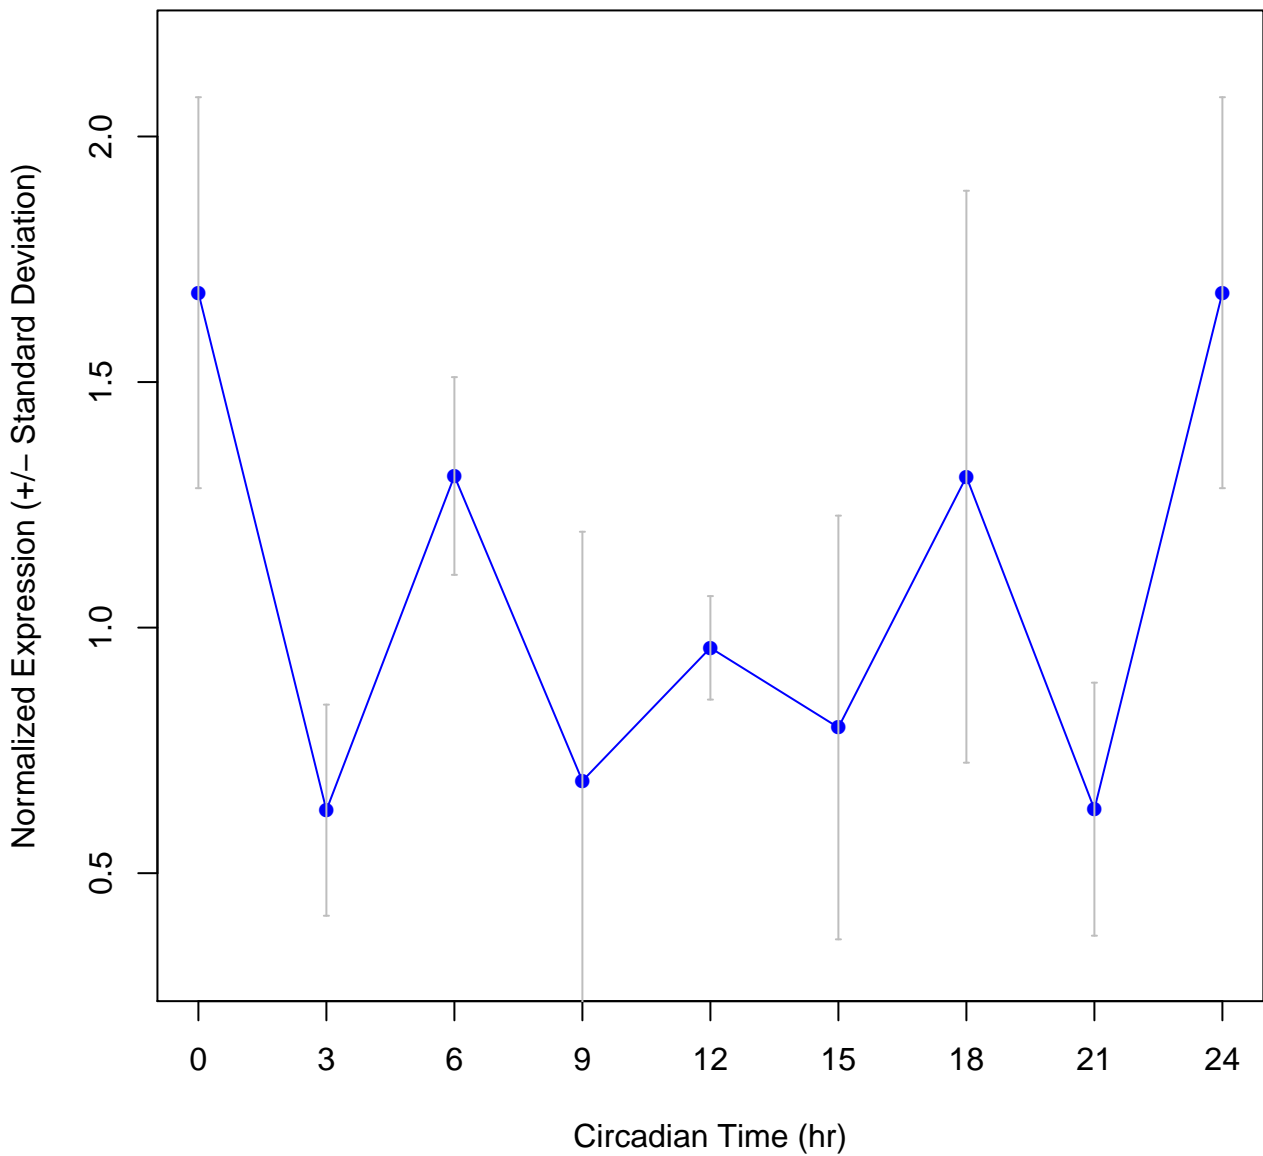

**Supplement Figure 3 ccnb1**

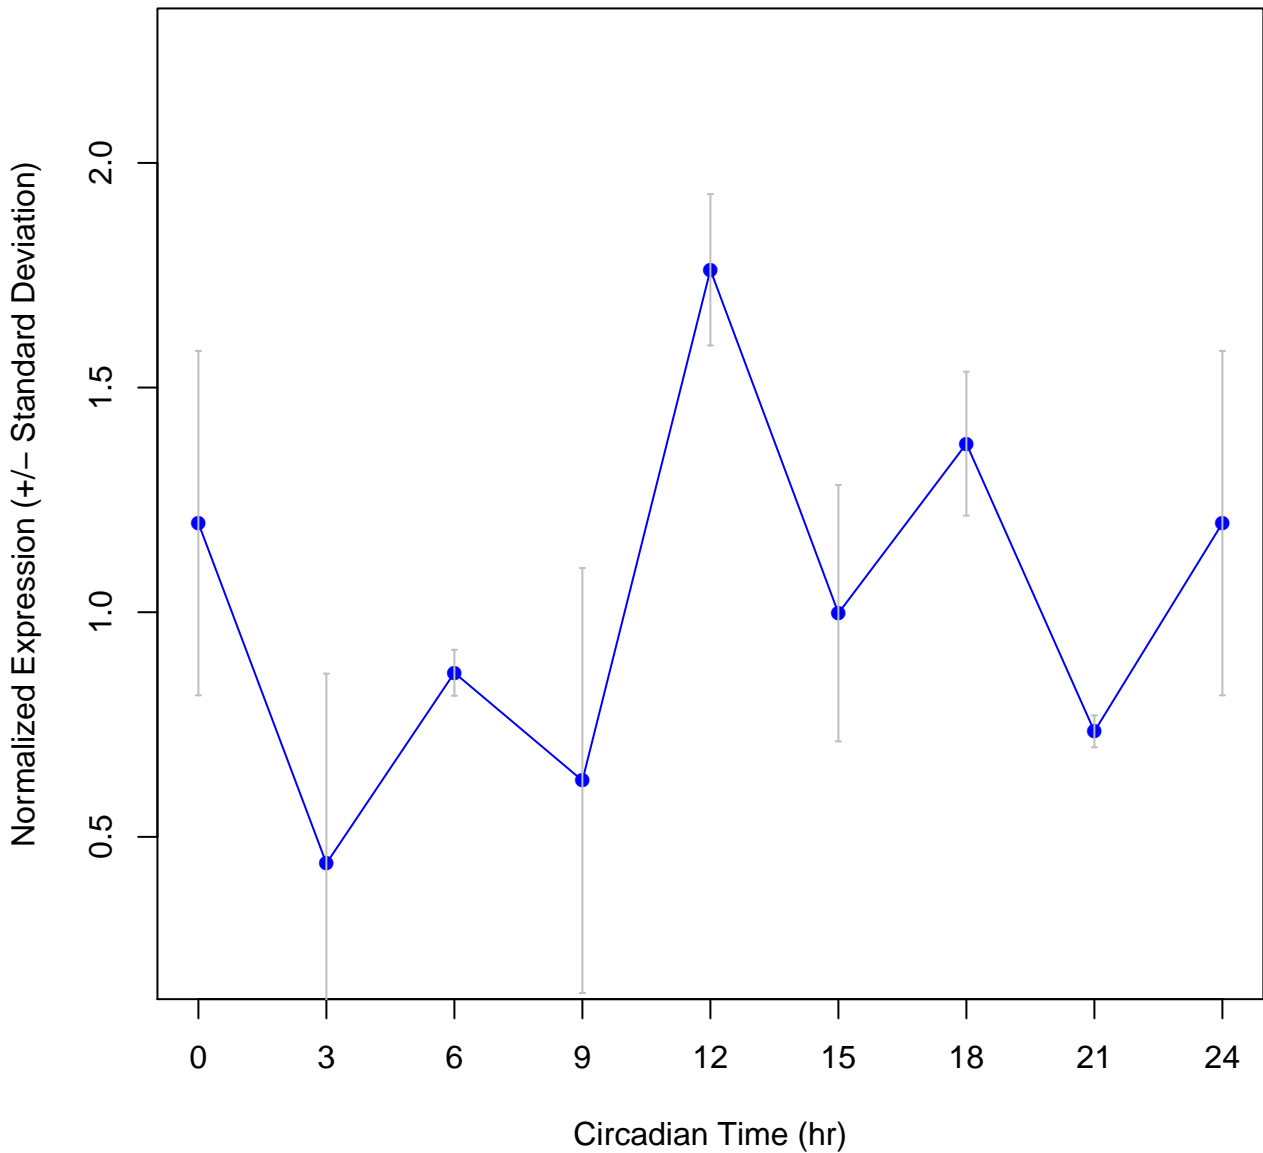

**Supplement Figure 3 ccnb2**

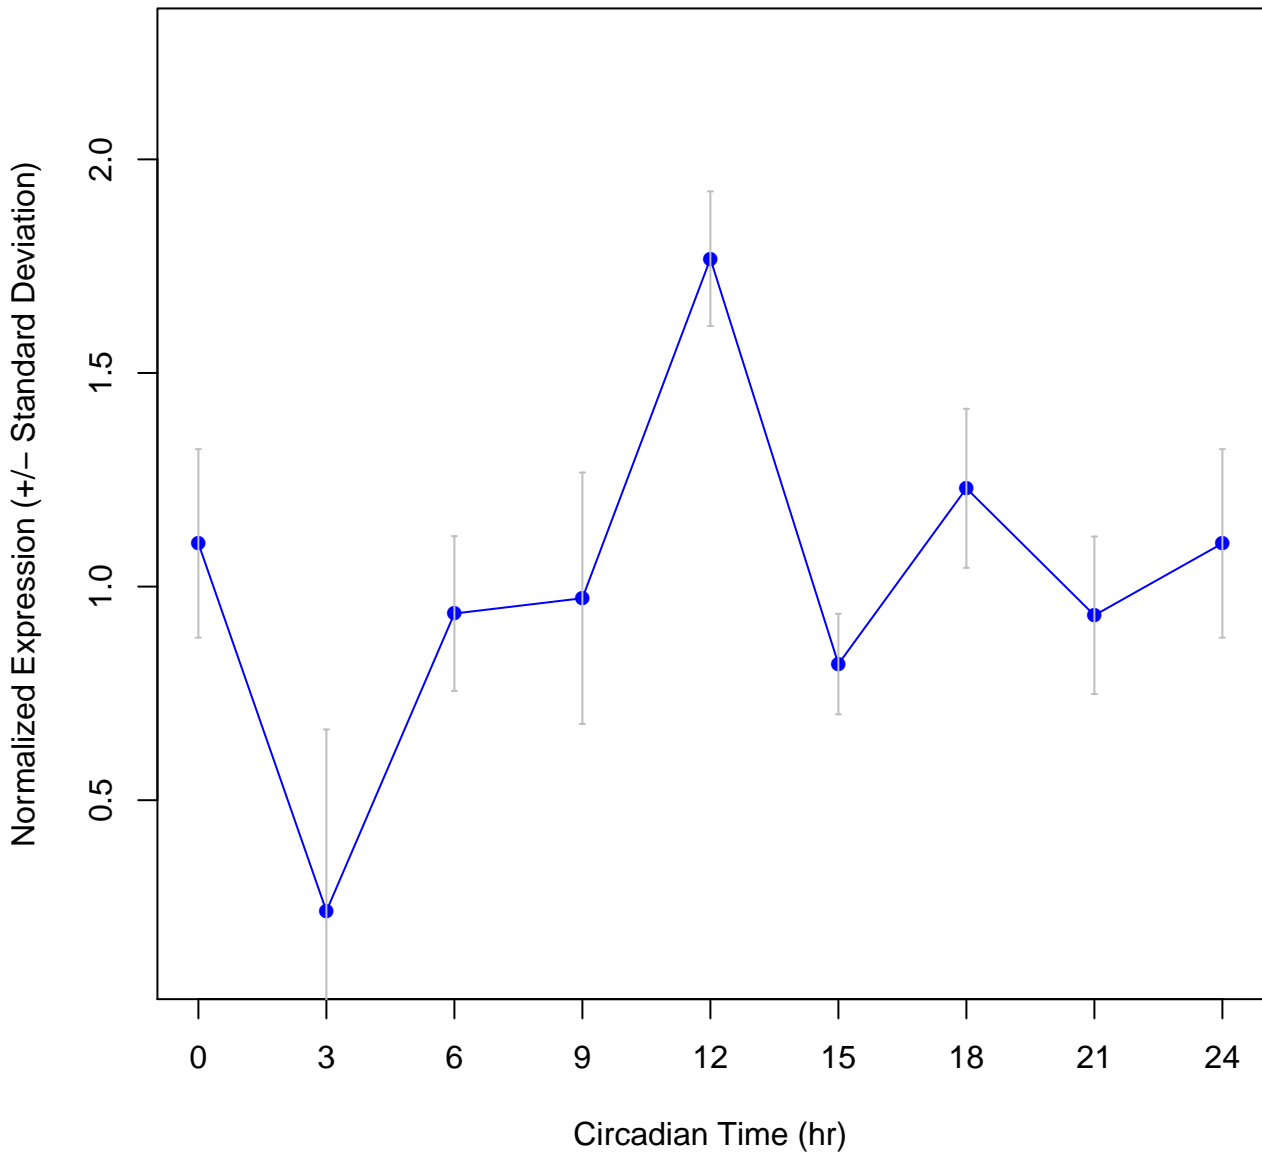

**Supplement Figure 3 ccnb3**

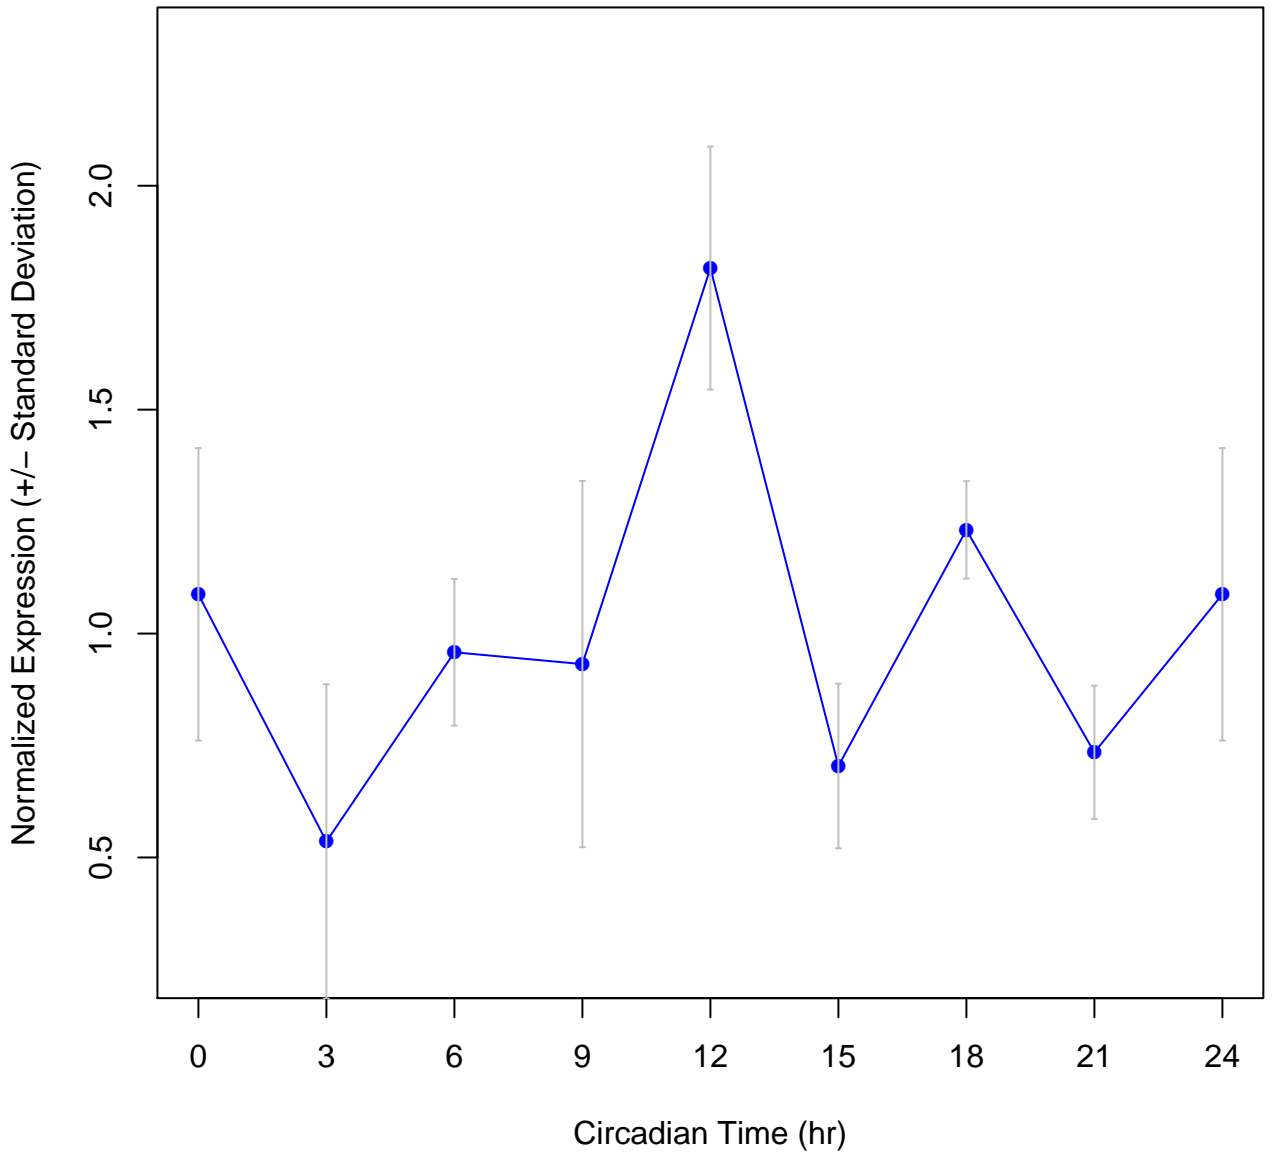

**Supplement Figure 3 ccnf**

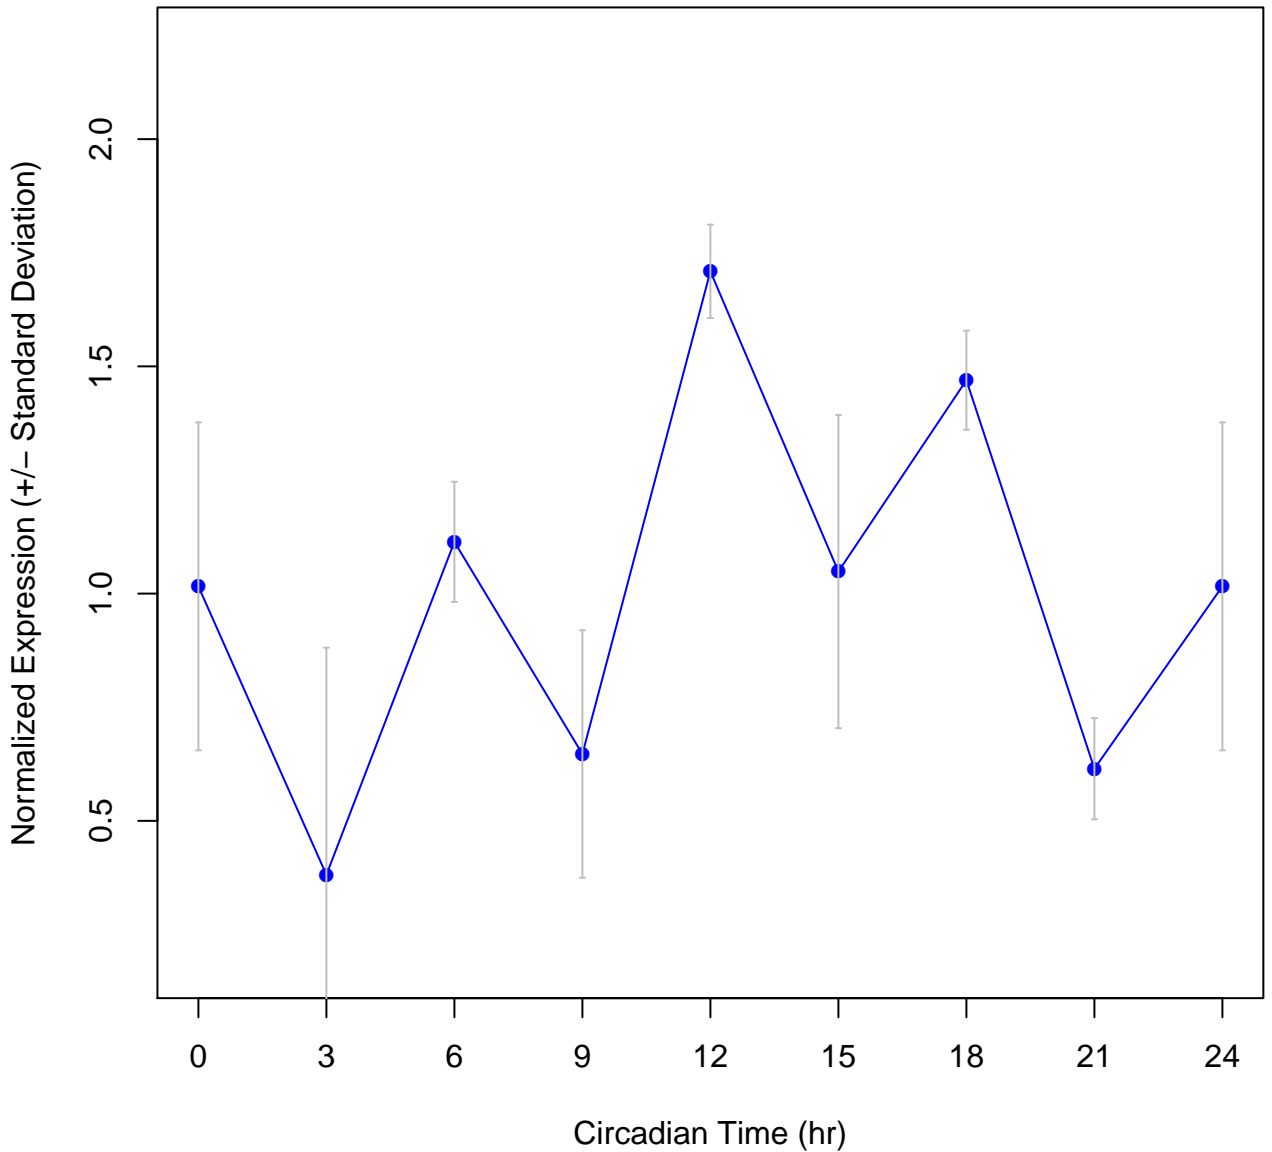



### Supplement Figure 3 cd44

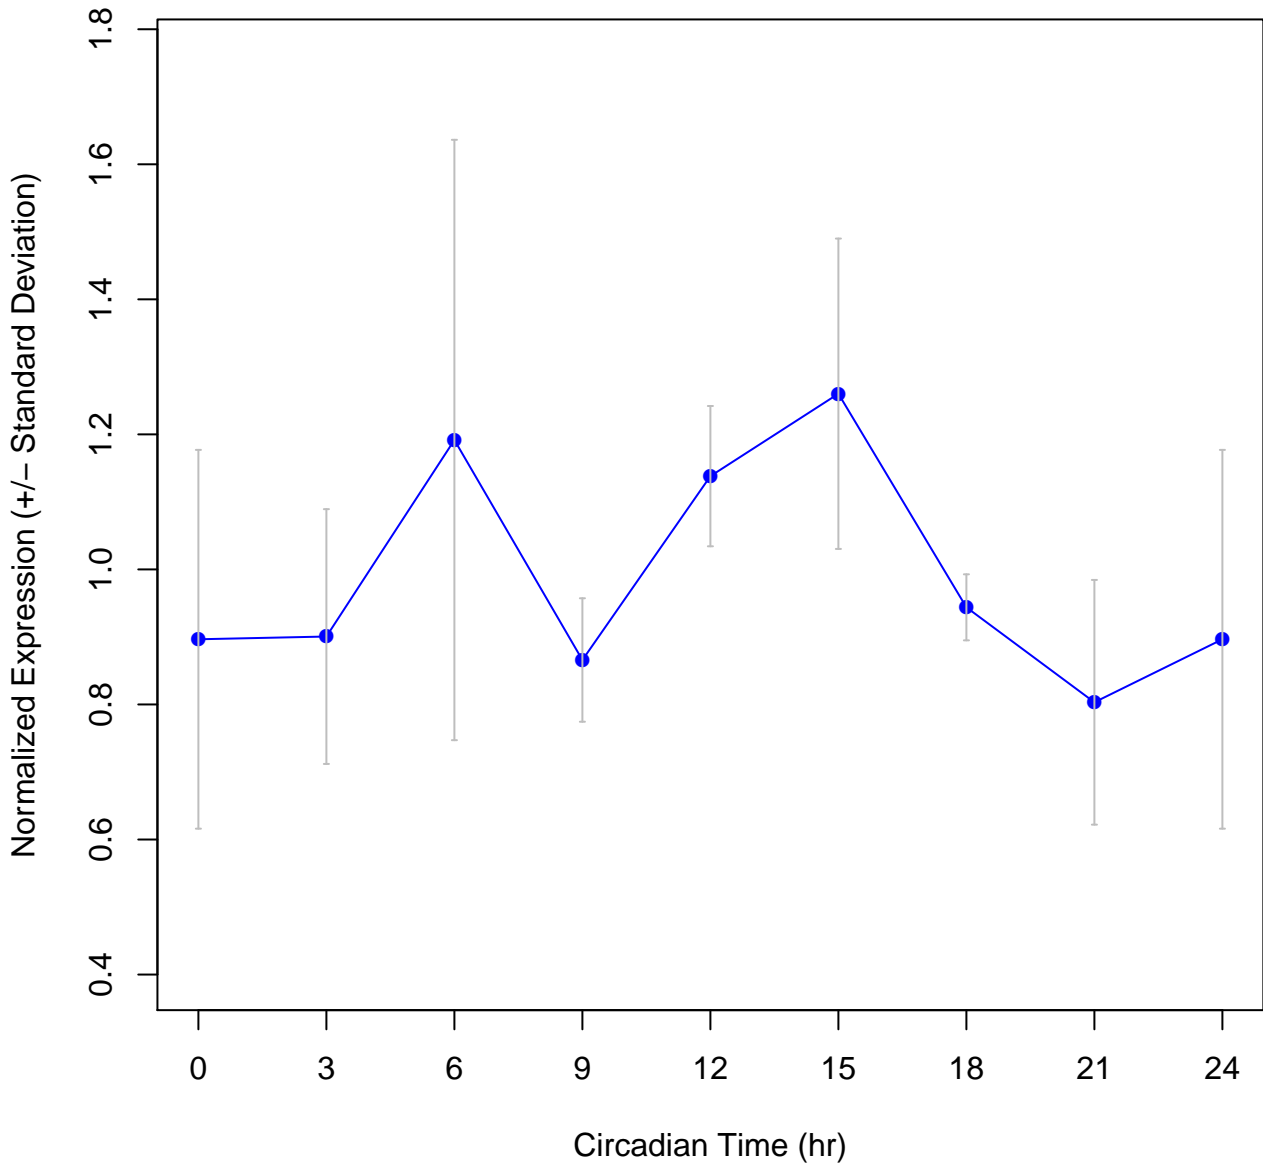

**Supplement Figure 3 cdc20**

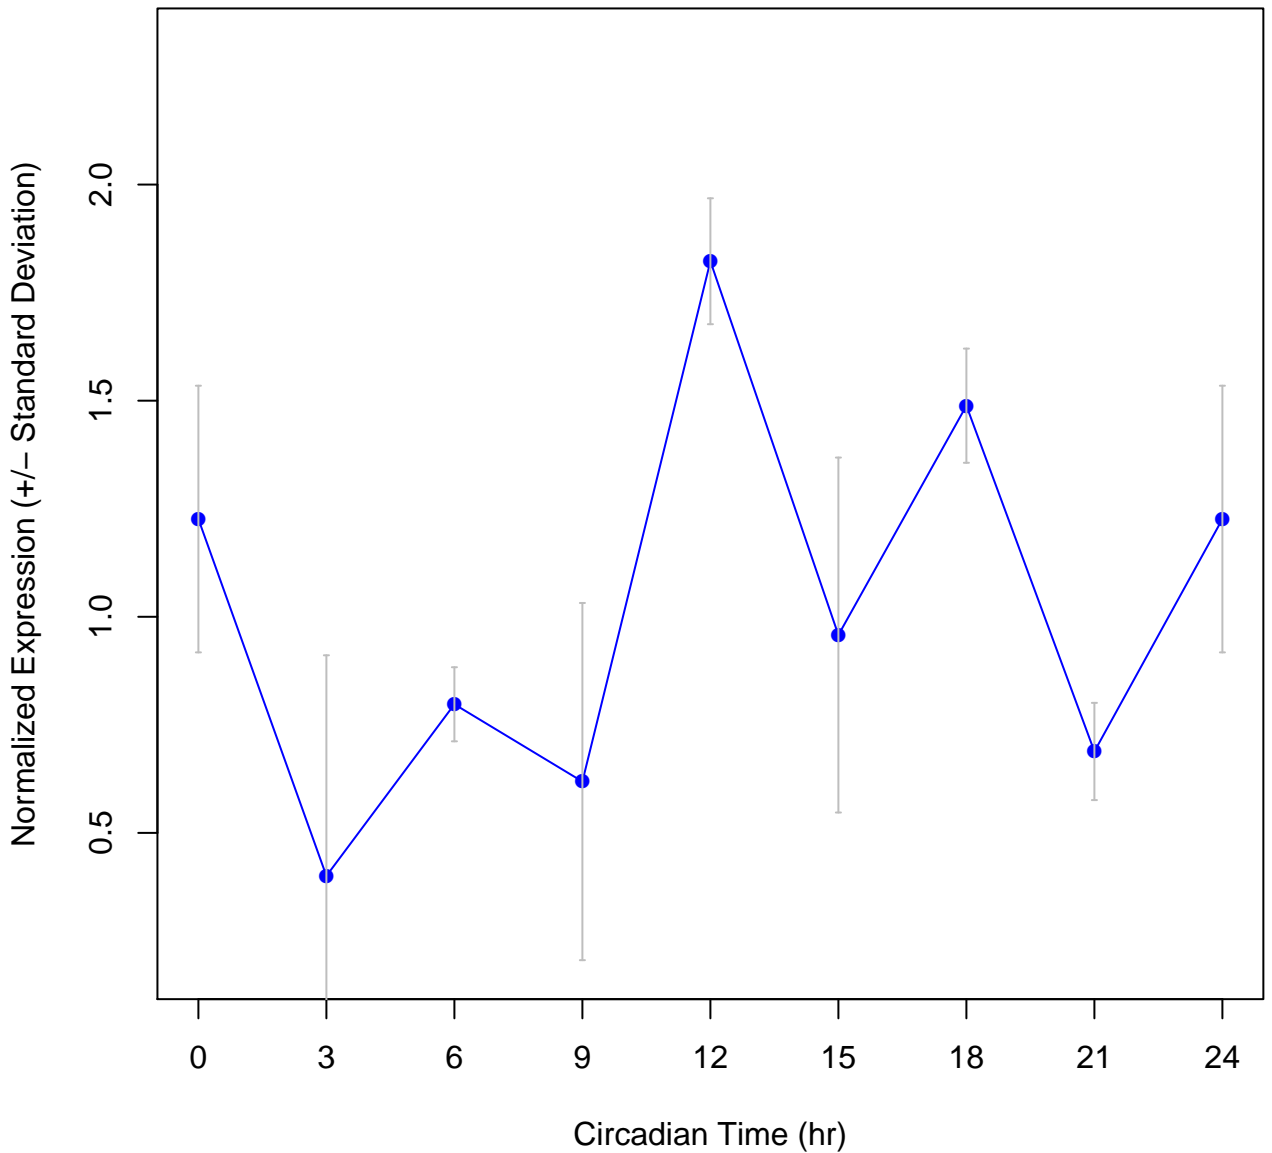

**Supplement Figure 3 *cdc25b***

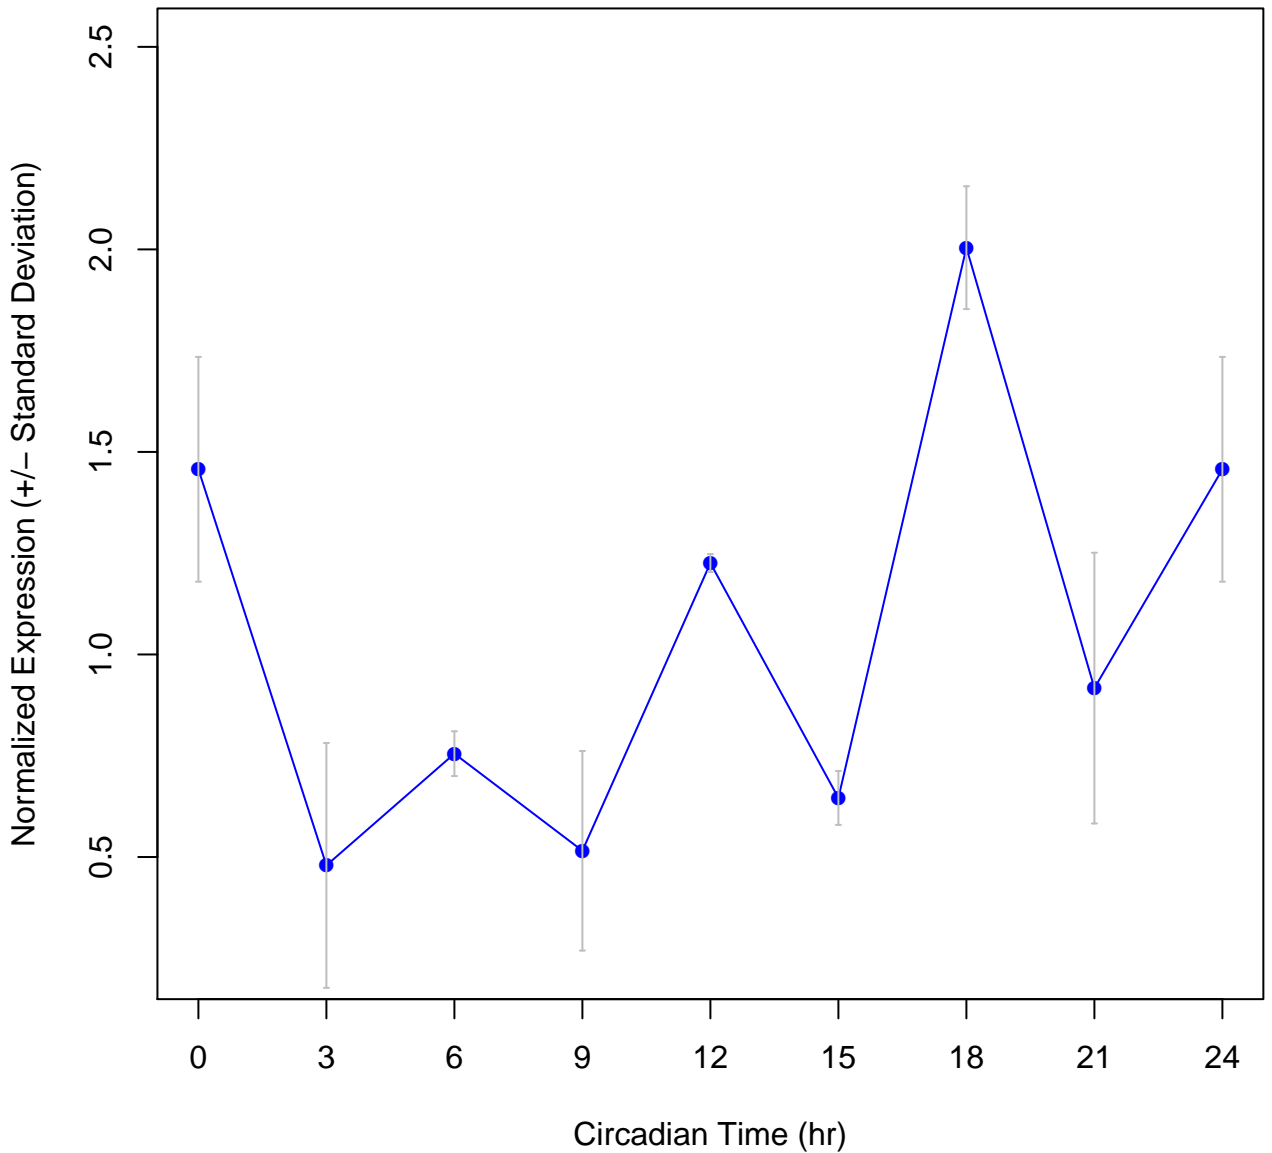

**Supplement Figure 3 cdca7**

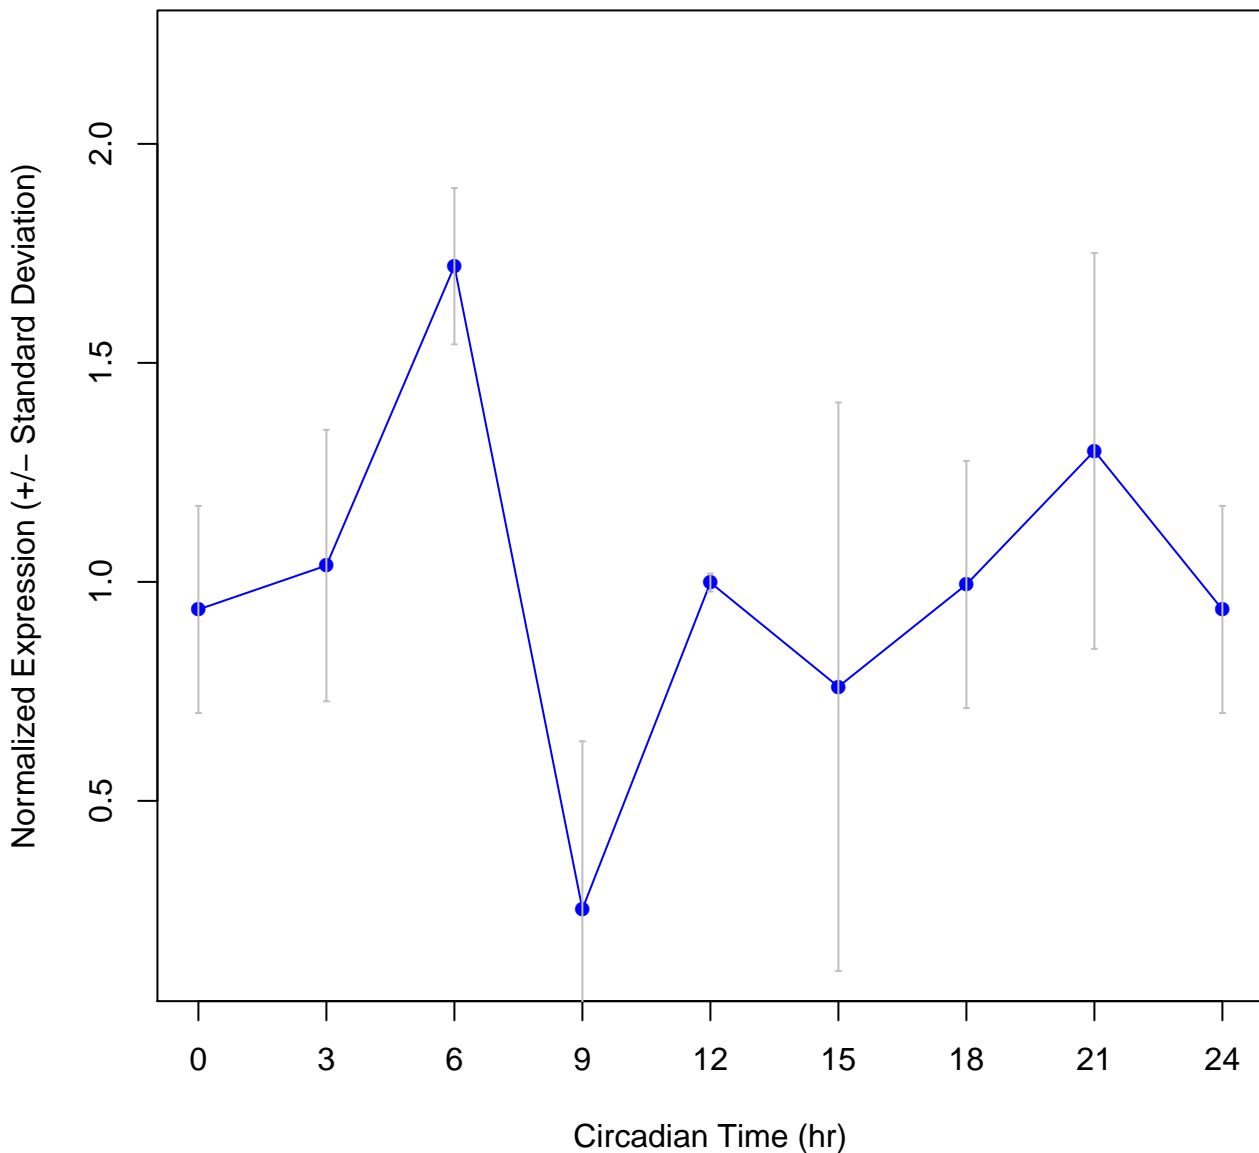

**Supplement Figure 3 cdh15**

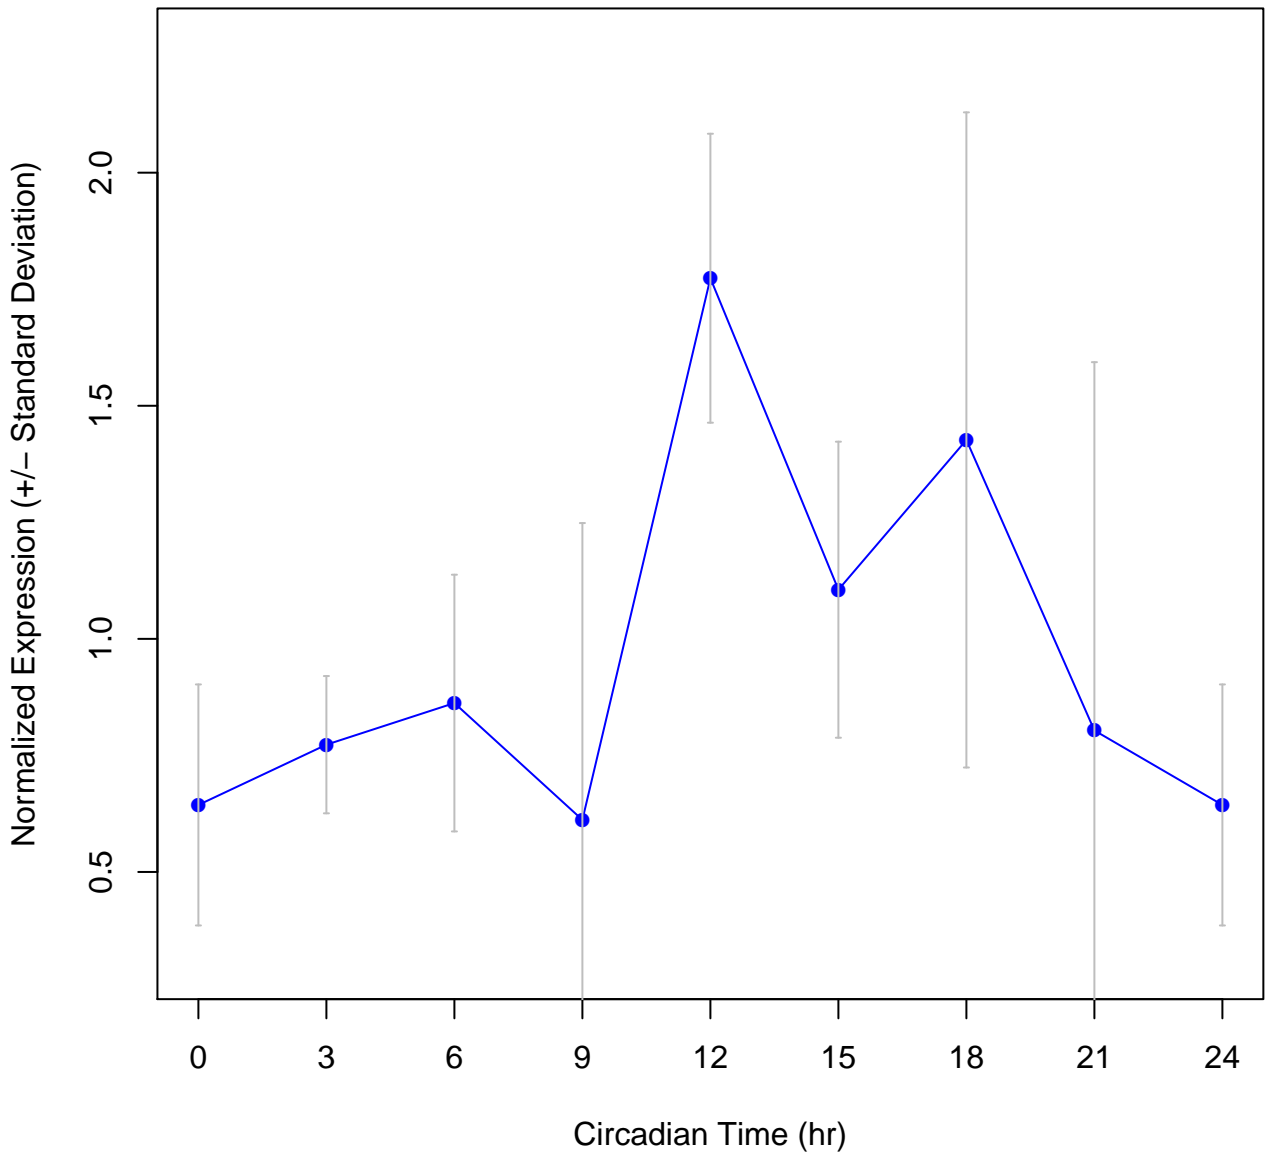

### Supplement Figure 3 cdk1

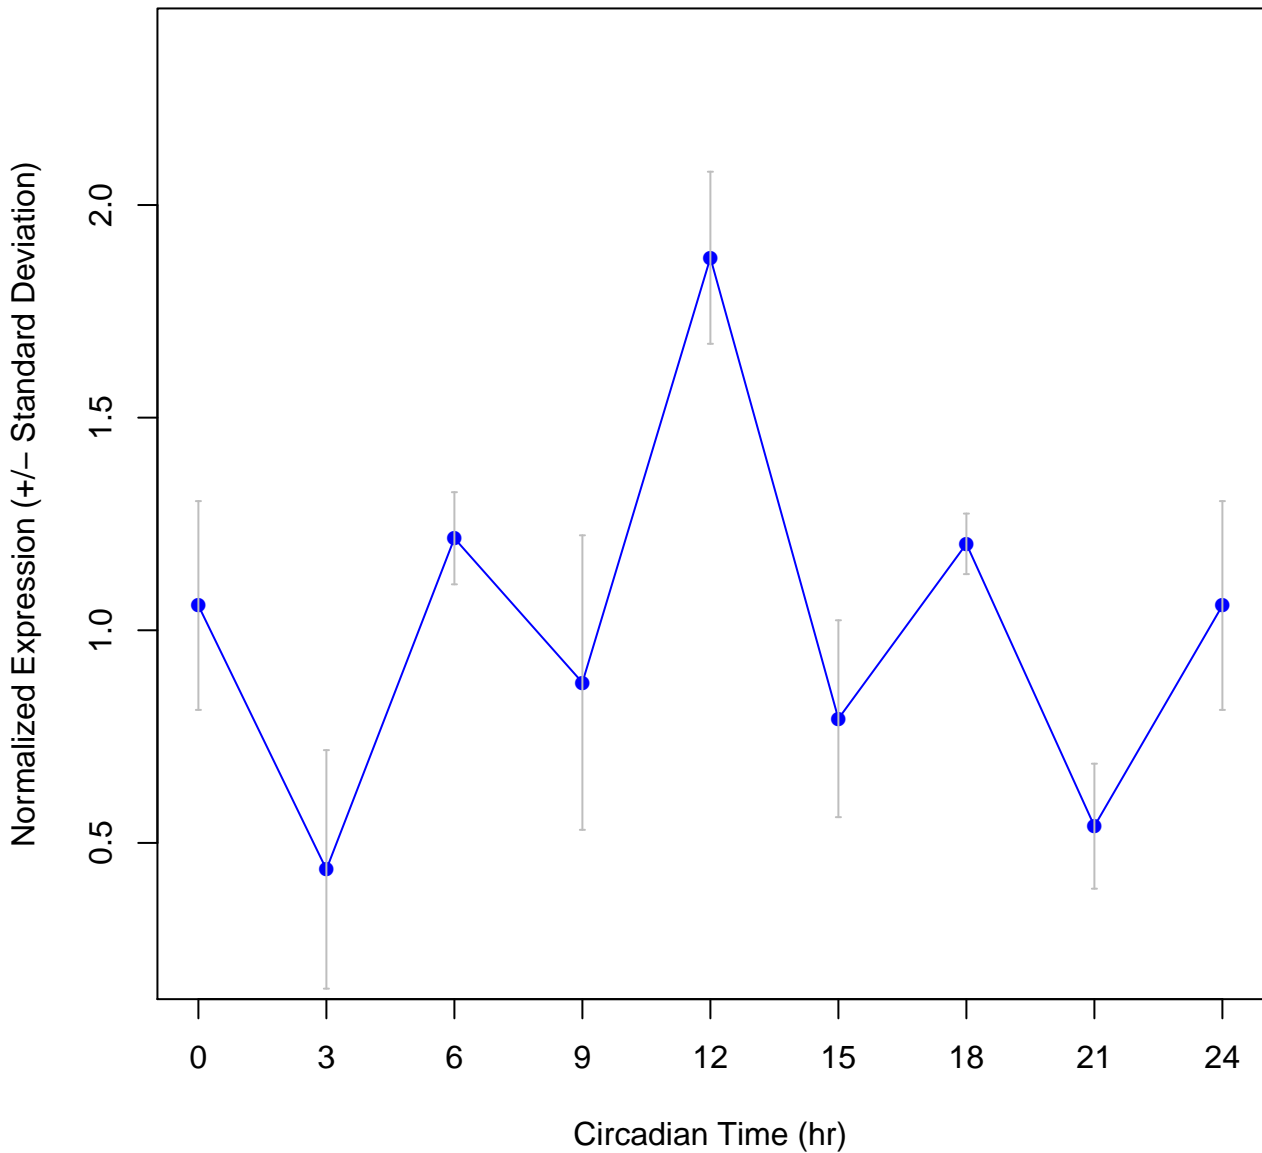

**Supplement Figure 3 cdk7**

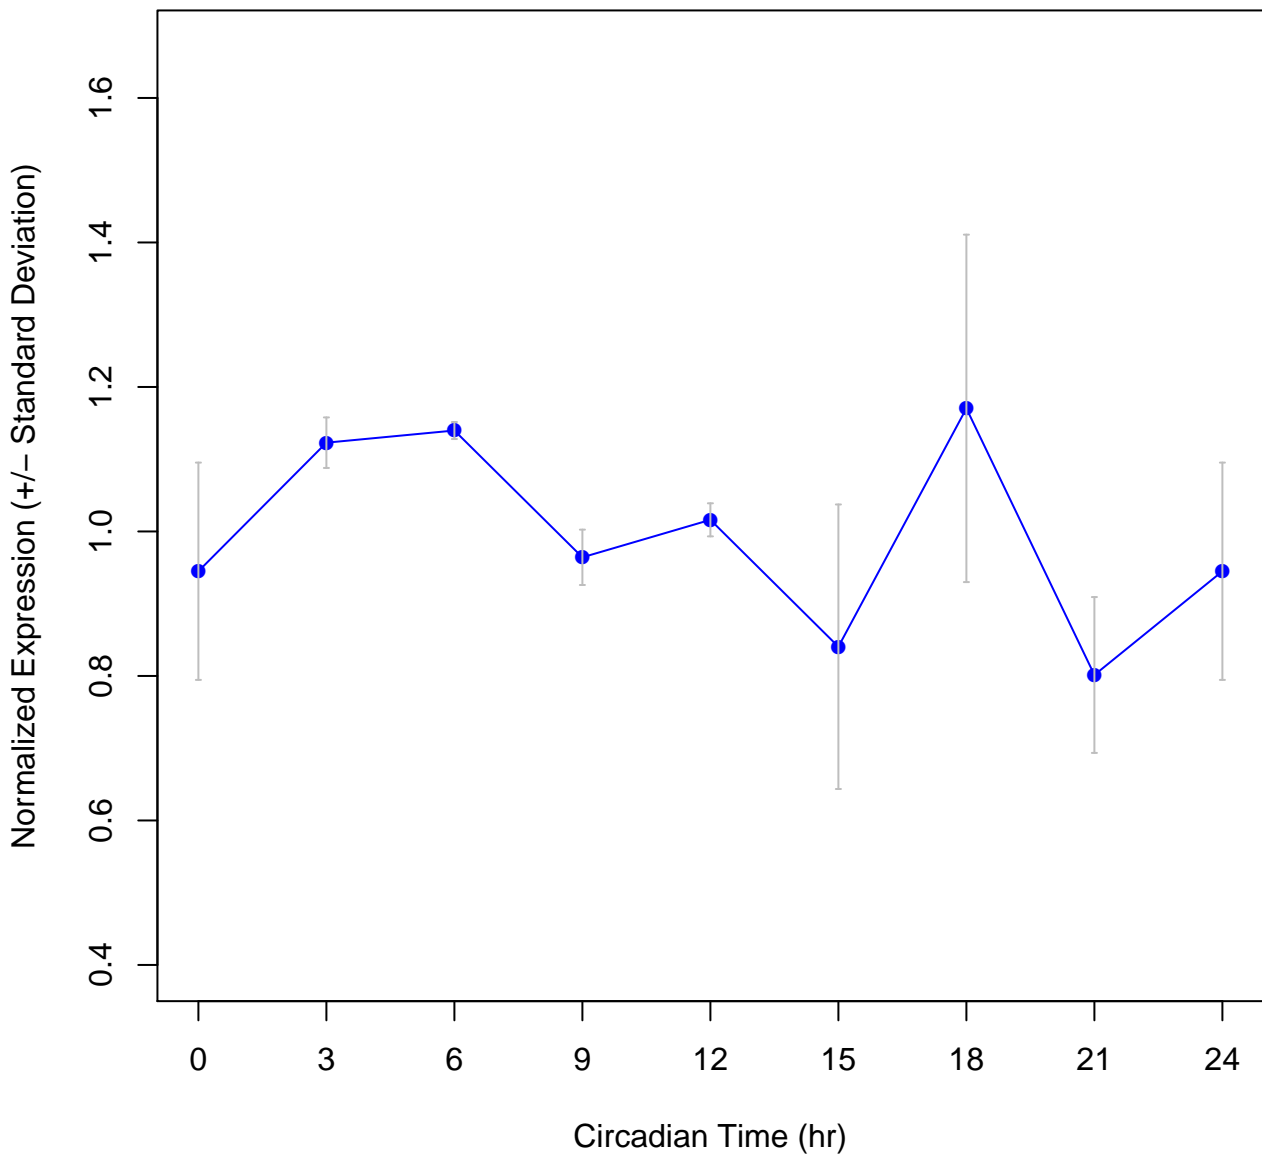

Supplement Figure 3 cdkn1a

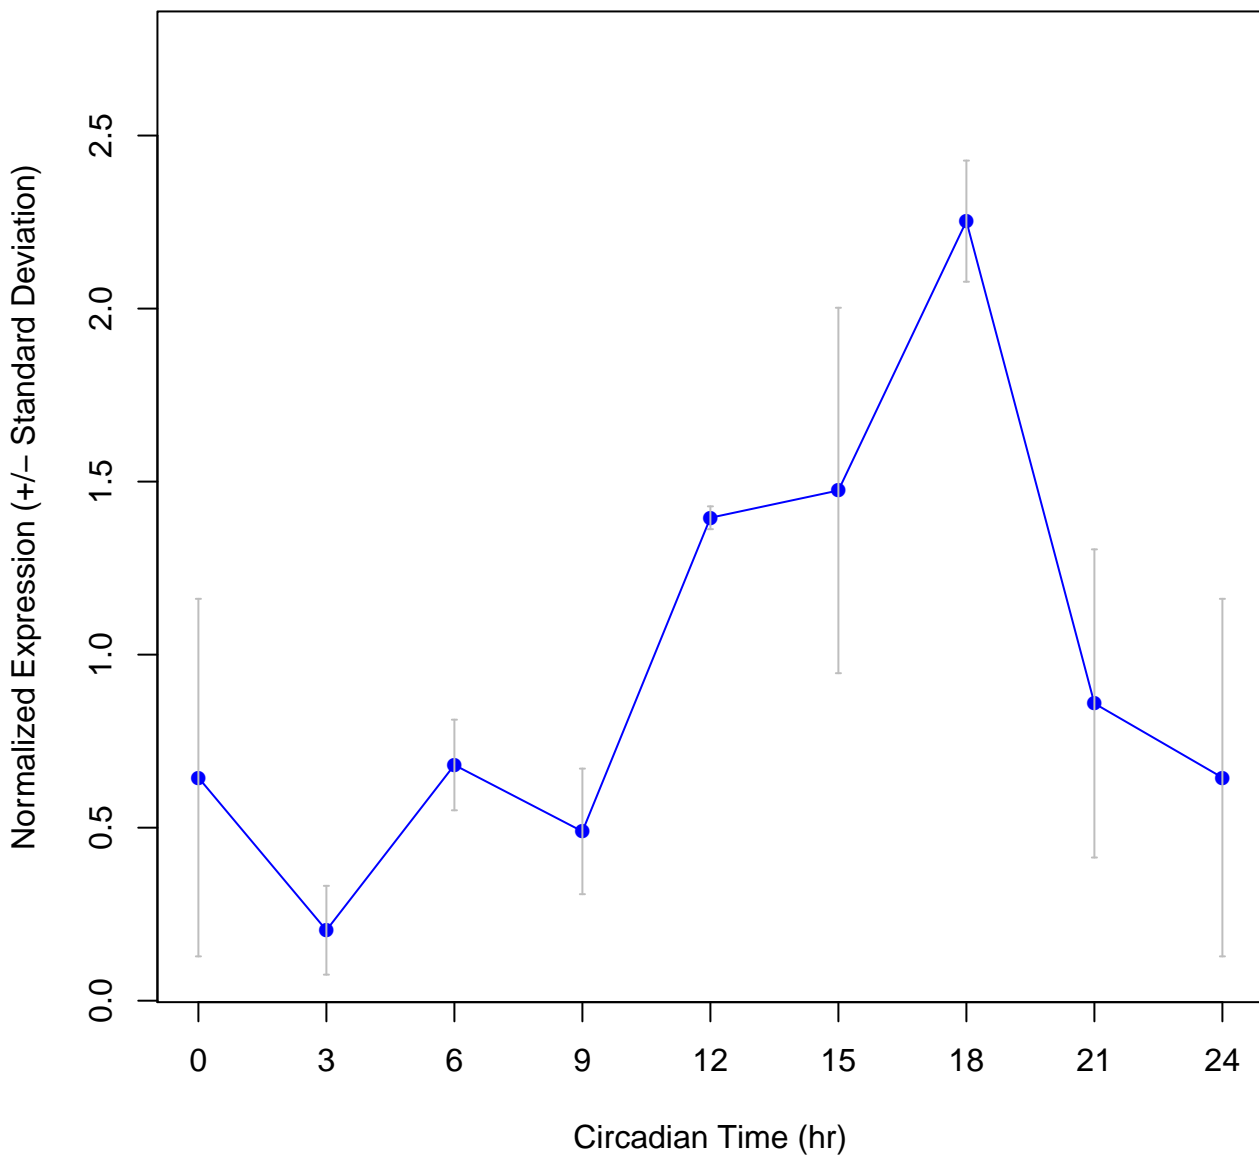



### Supplement Figure 3 chk1

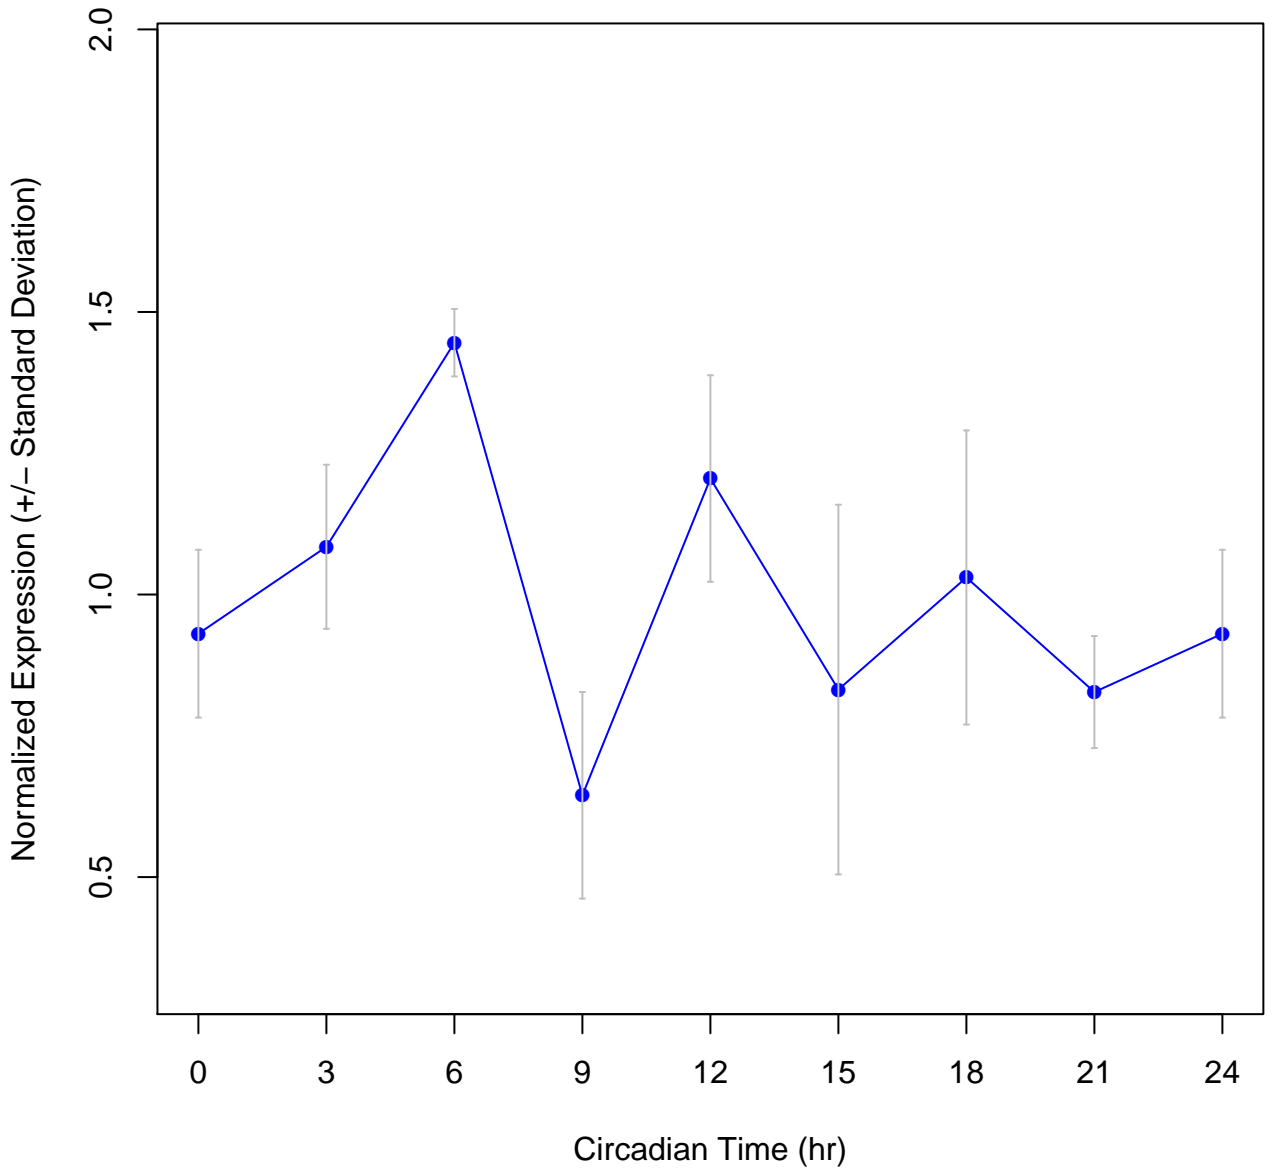

Supplement Figure 3 chrnb1

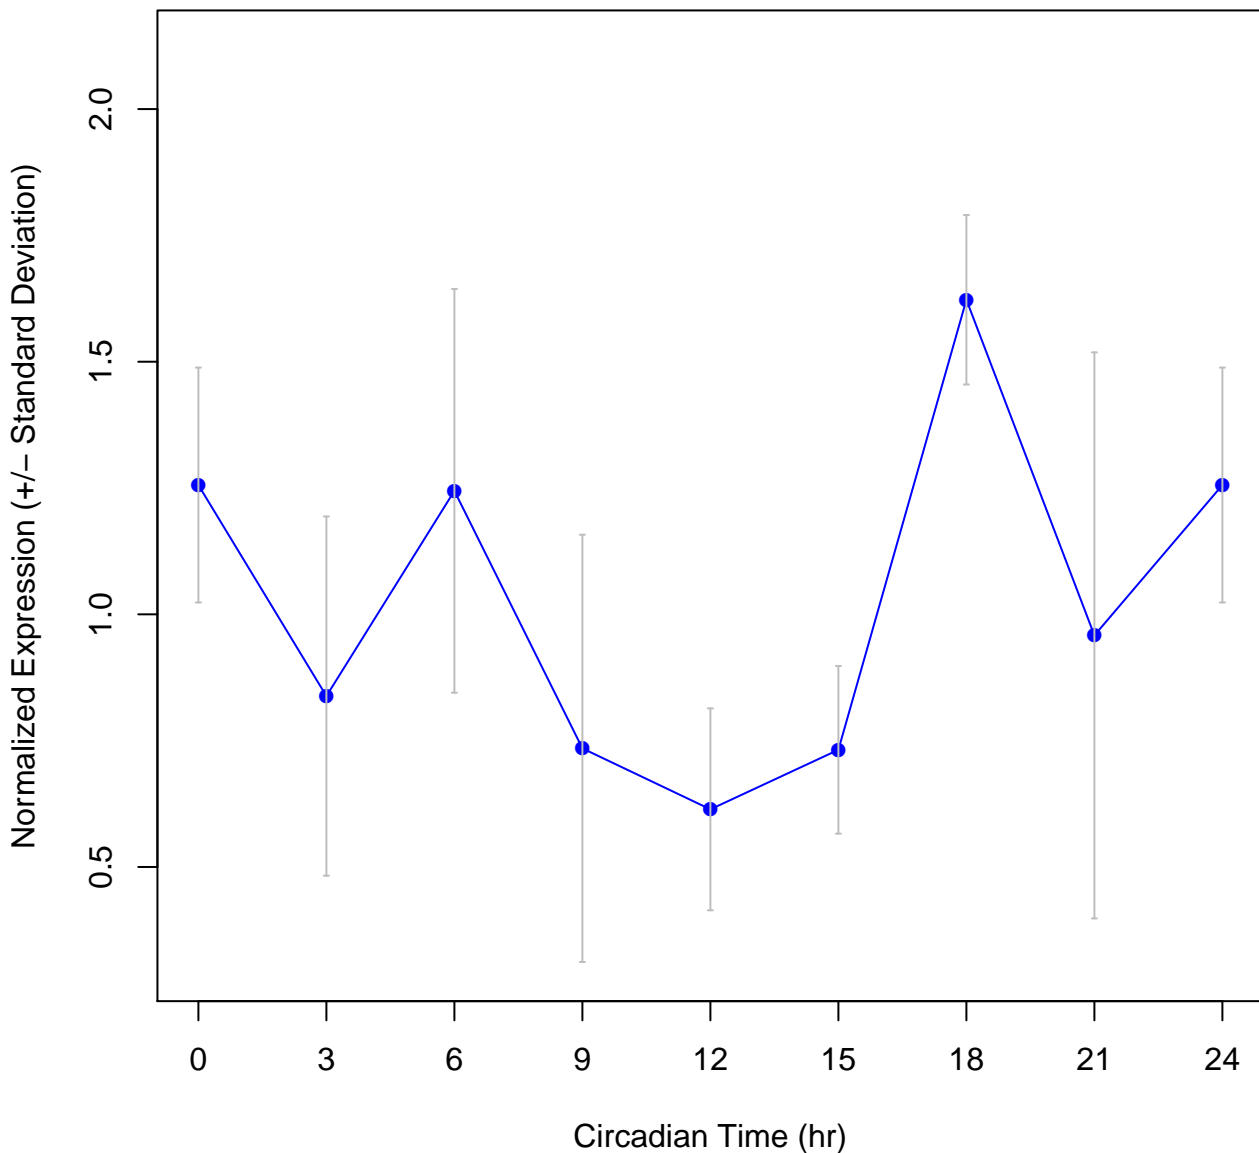

**Supplement Figure 3 ck1e**

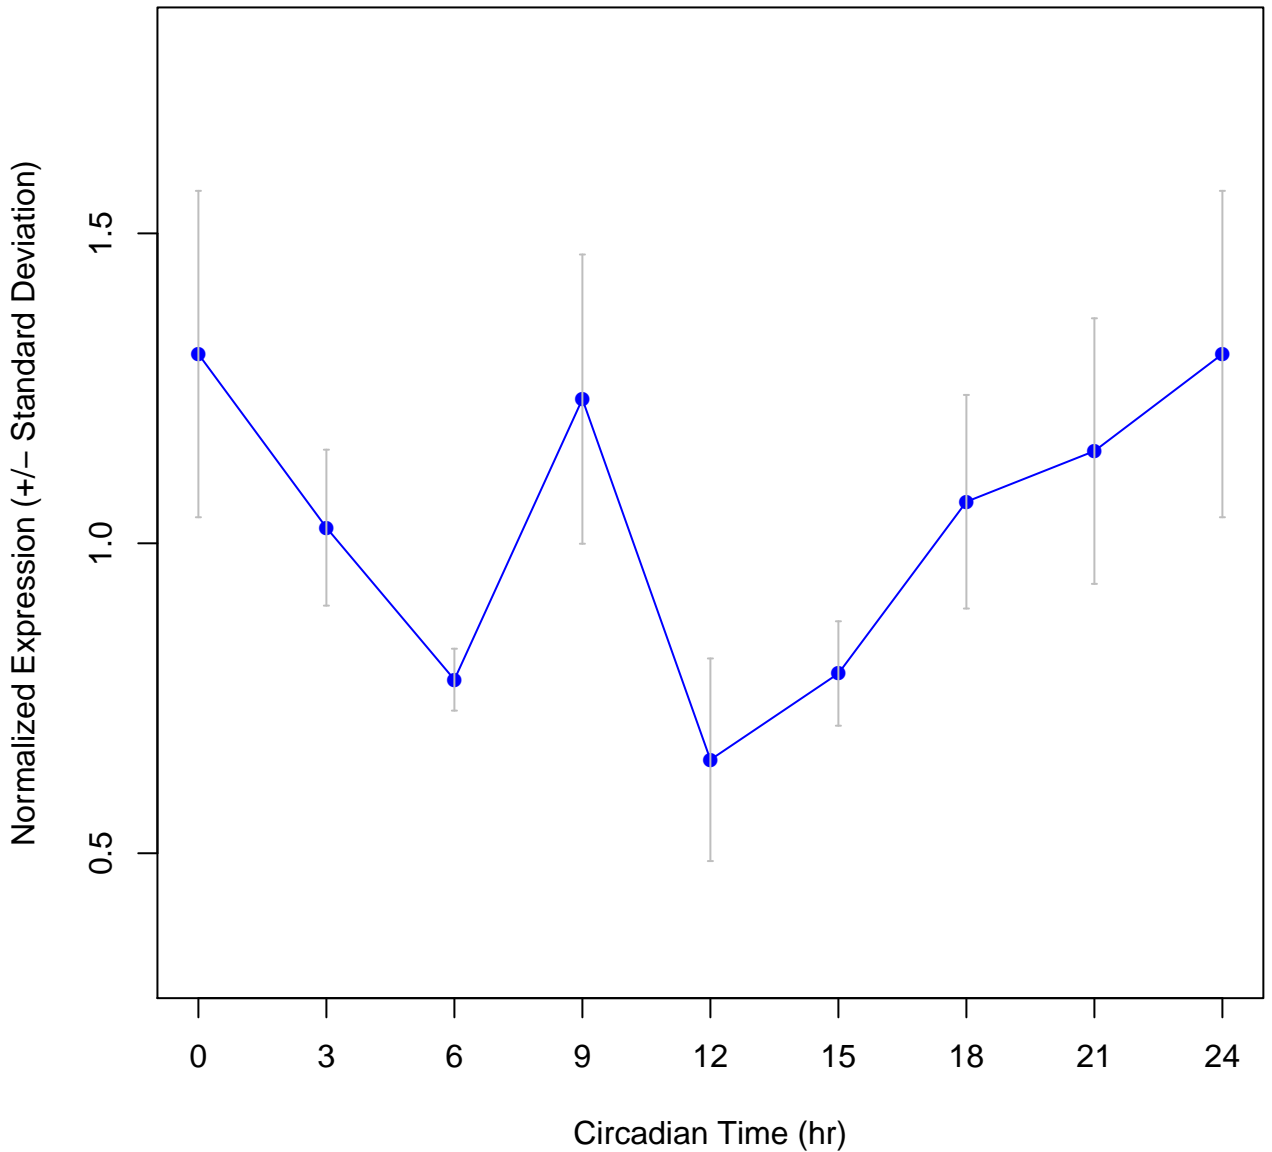

Supplement Figure 3 ckm

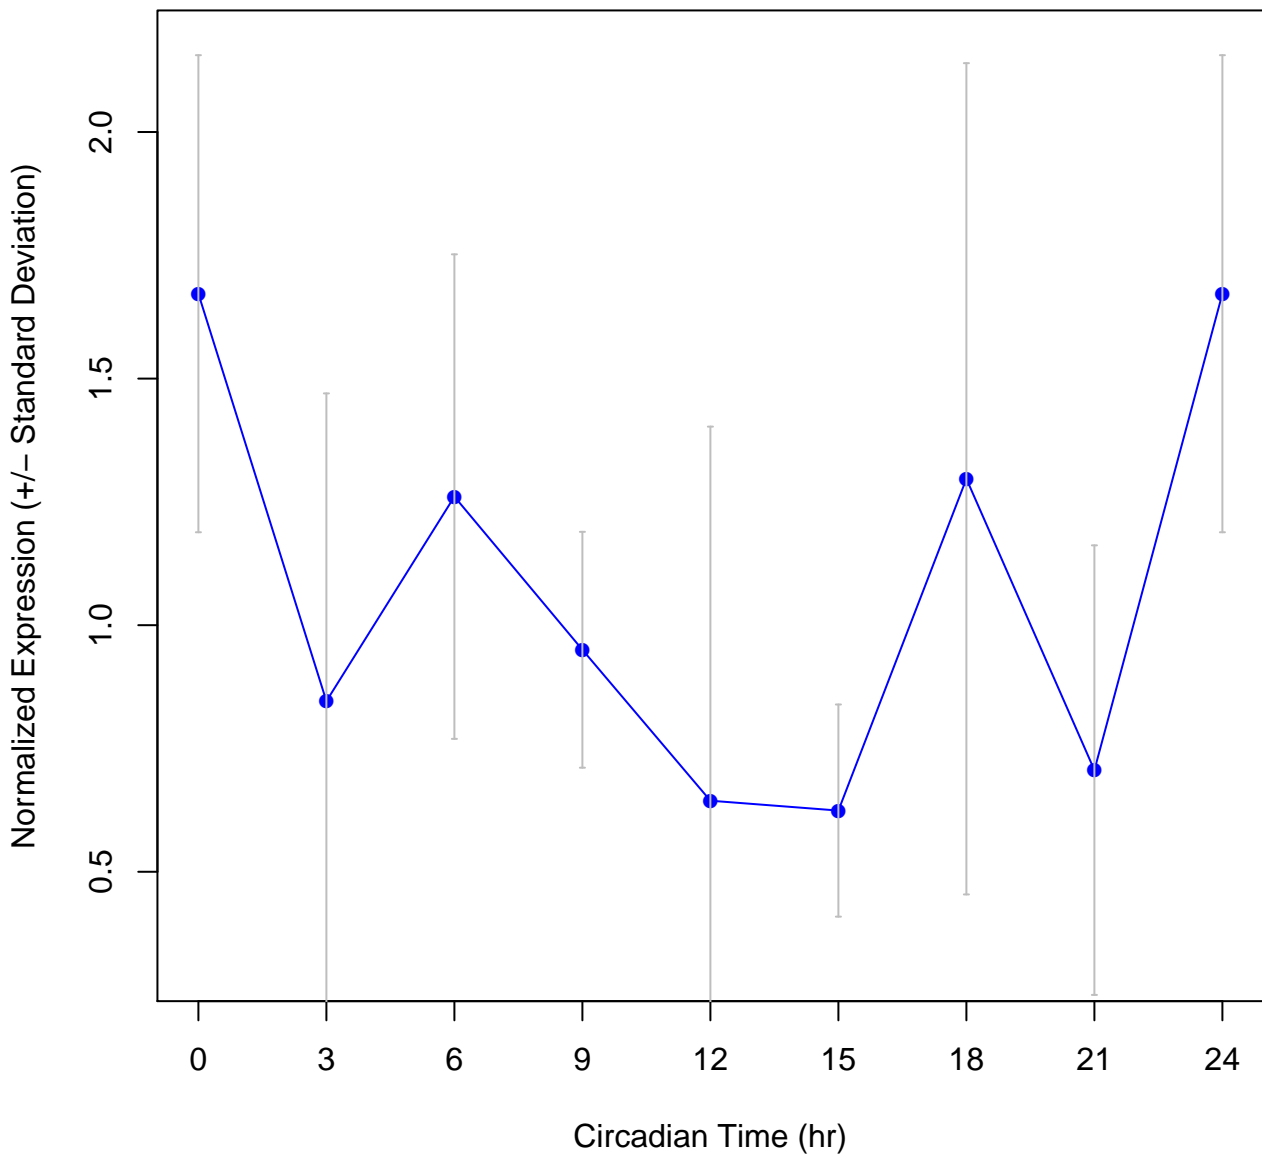

### Supplement Figure 3 cks2

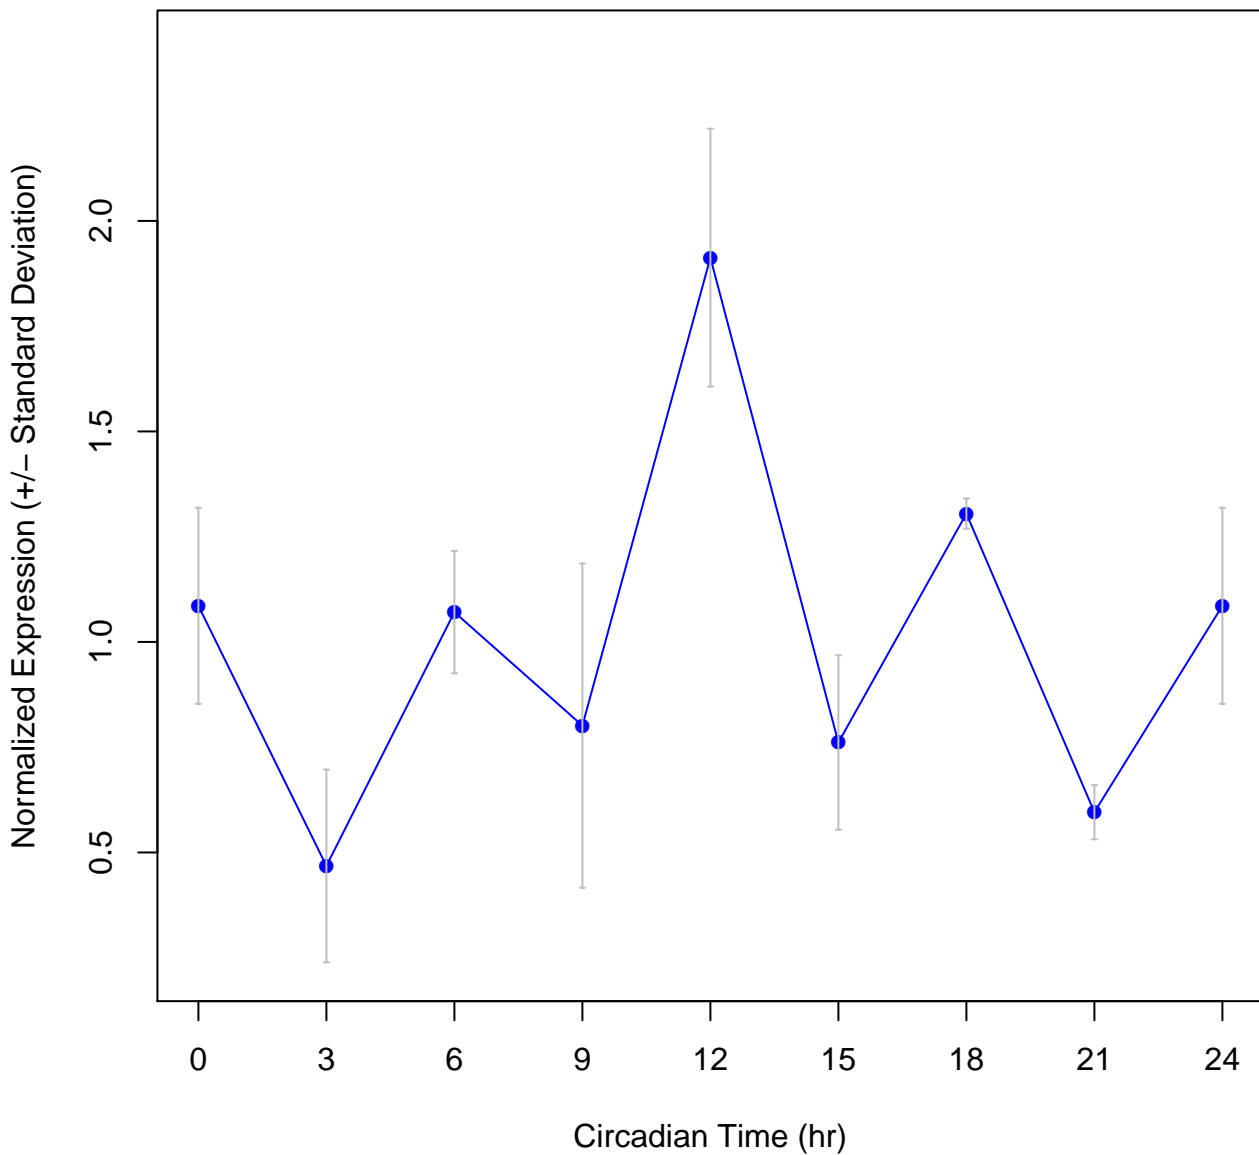

### Supplement Figure 3 clocka

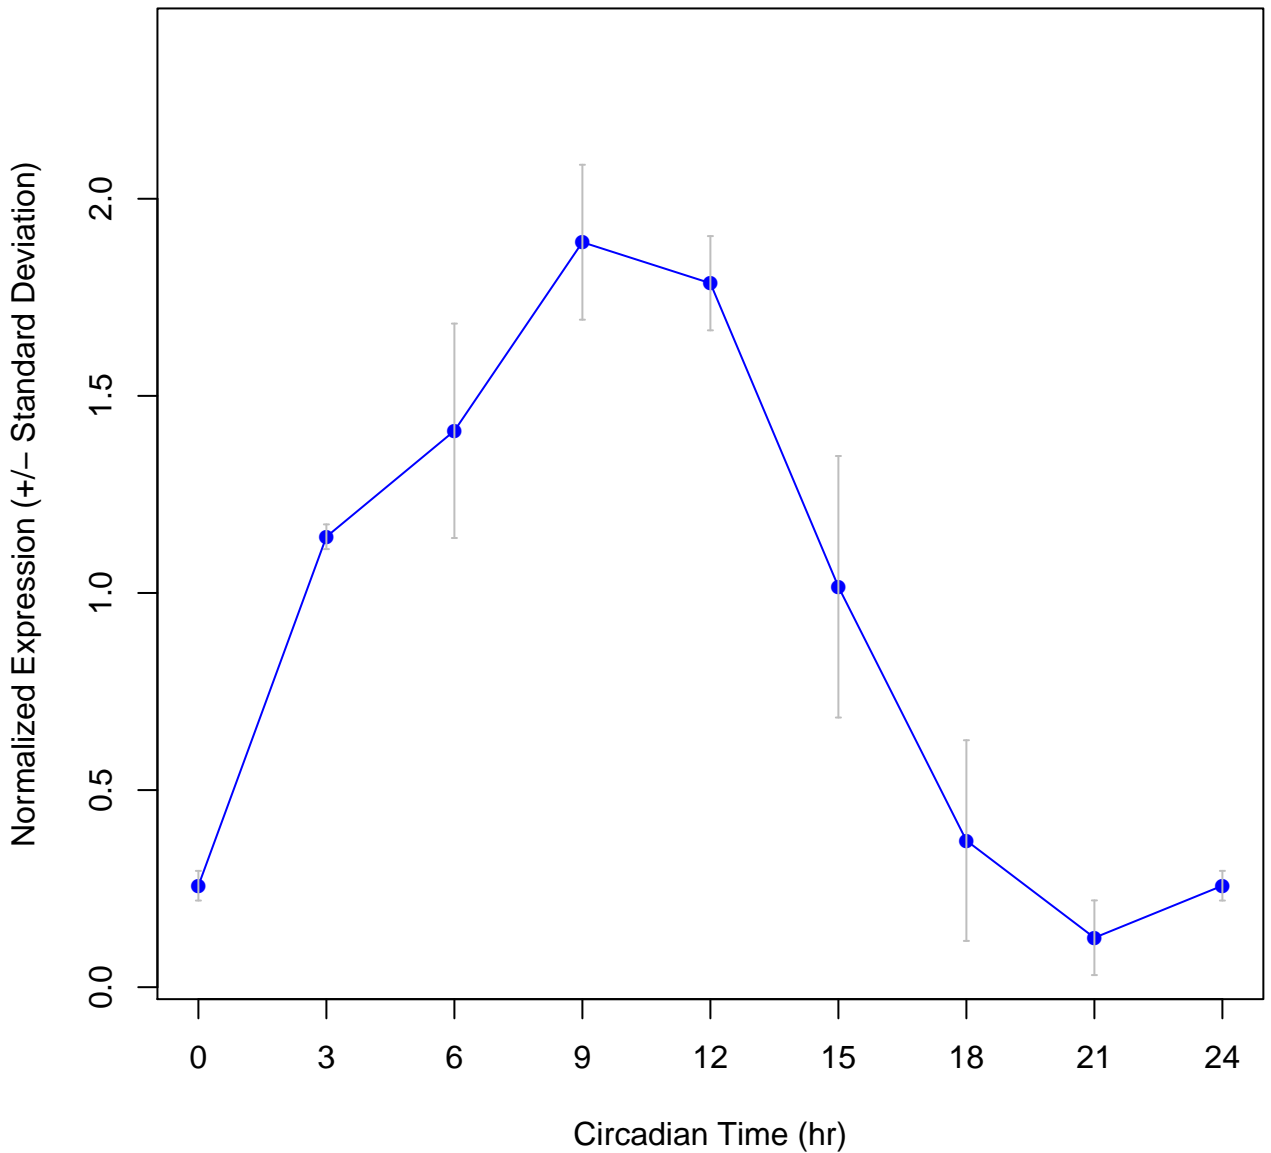

**Supplement Figure 3 clockb**

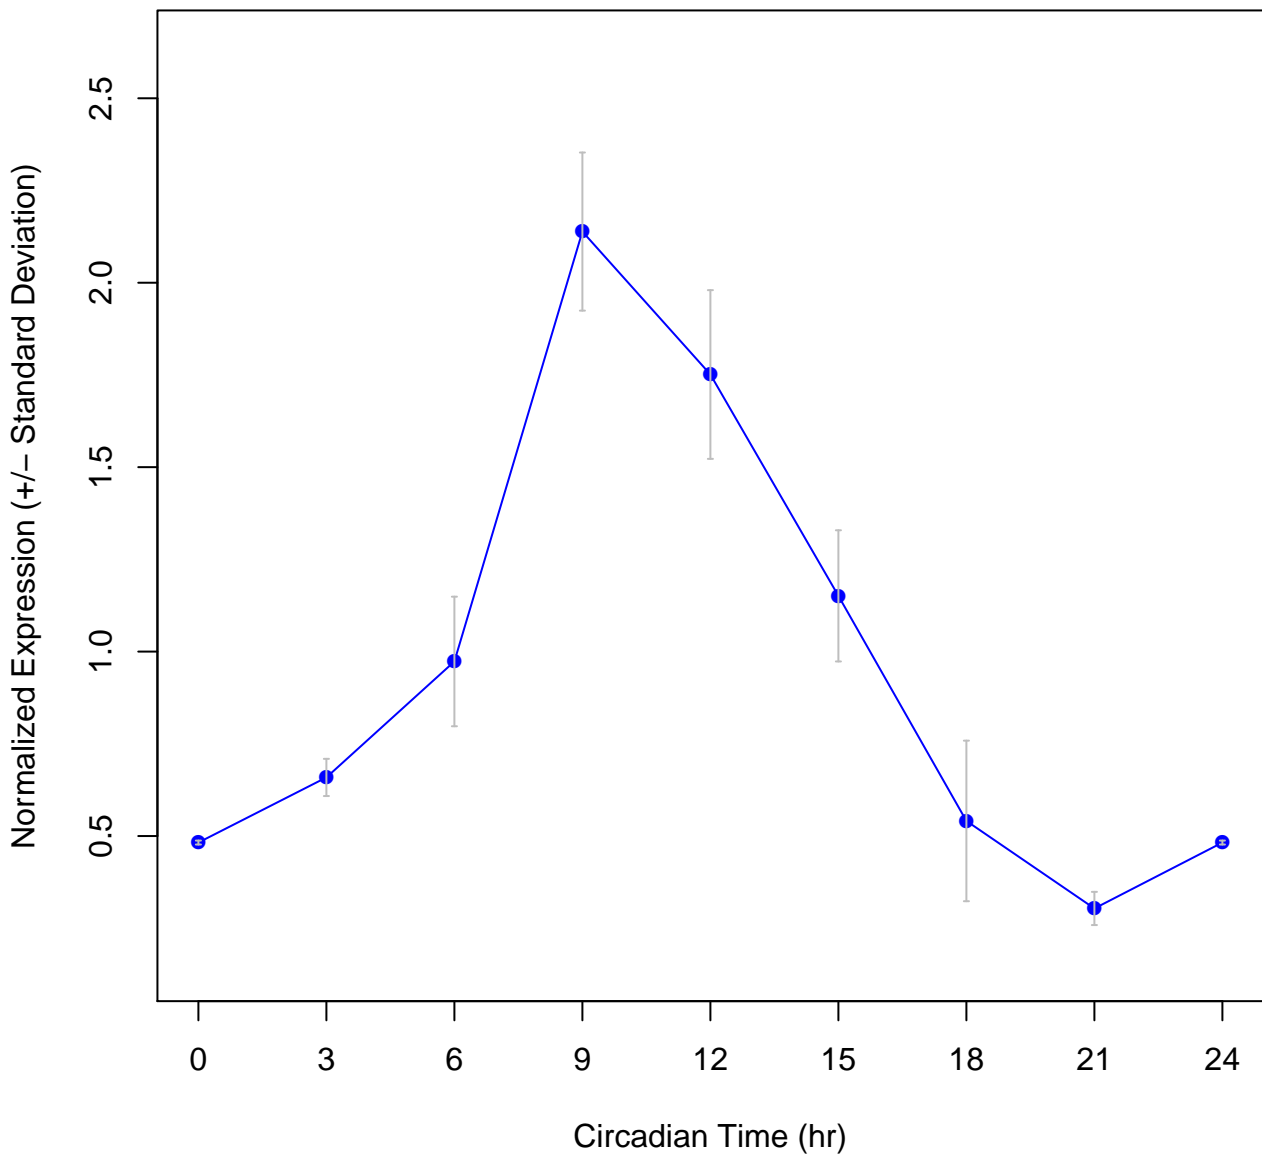

### Supplement Figure 3 col9a1

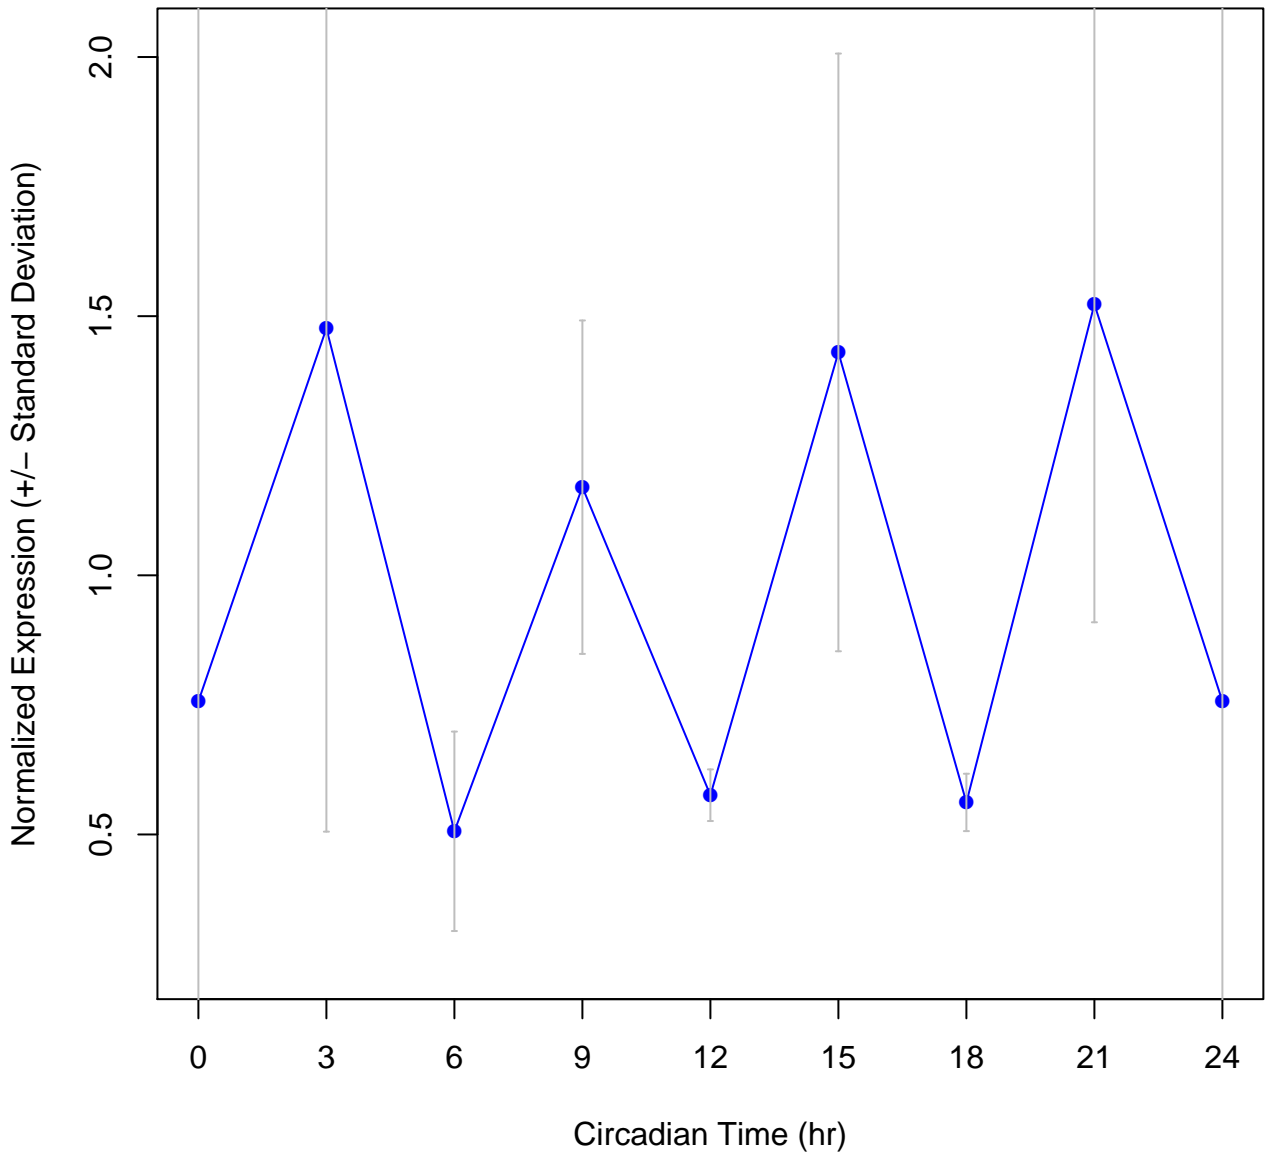



### Supplement Figure 3 cpd photolyase

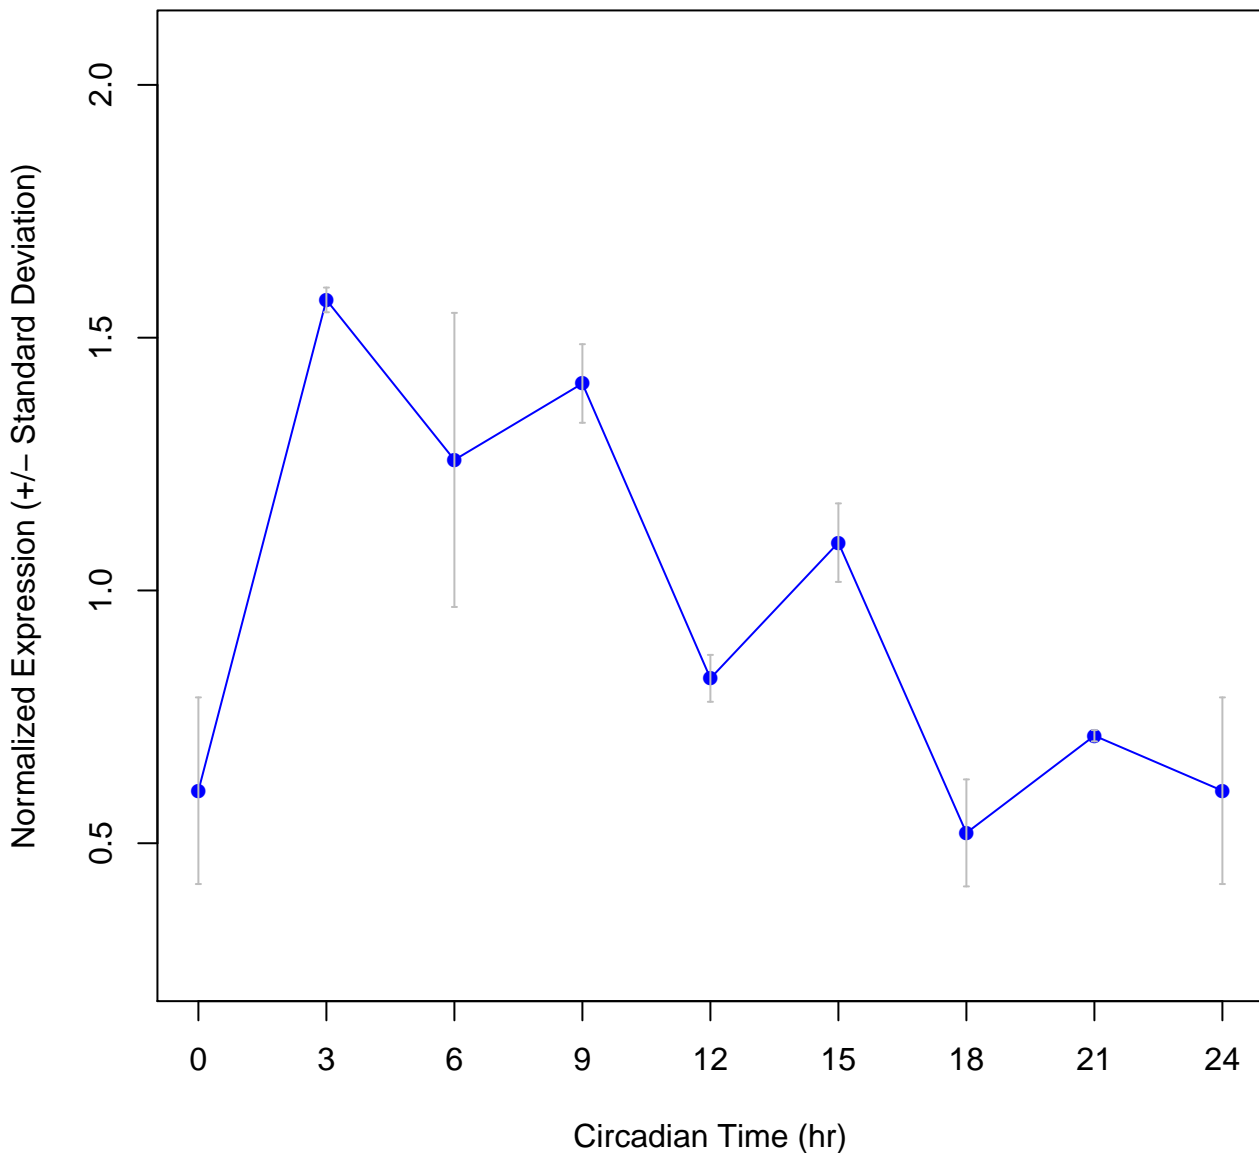

### Supplement Figure 3 creb5

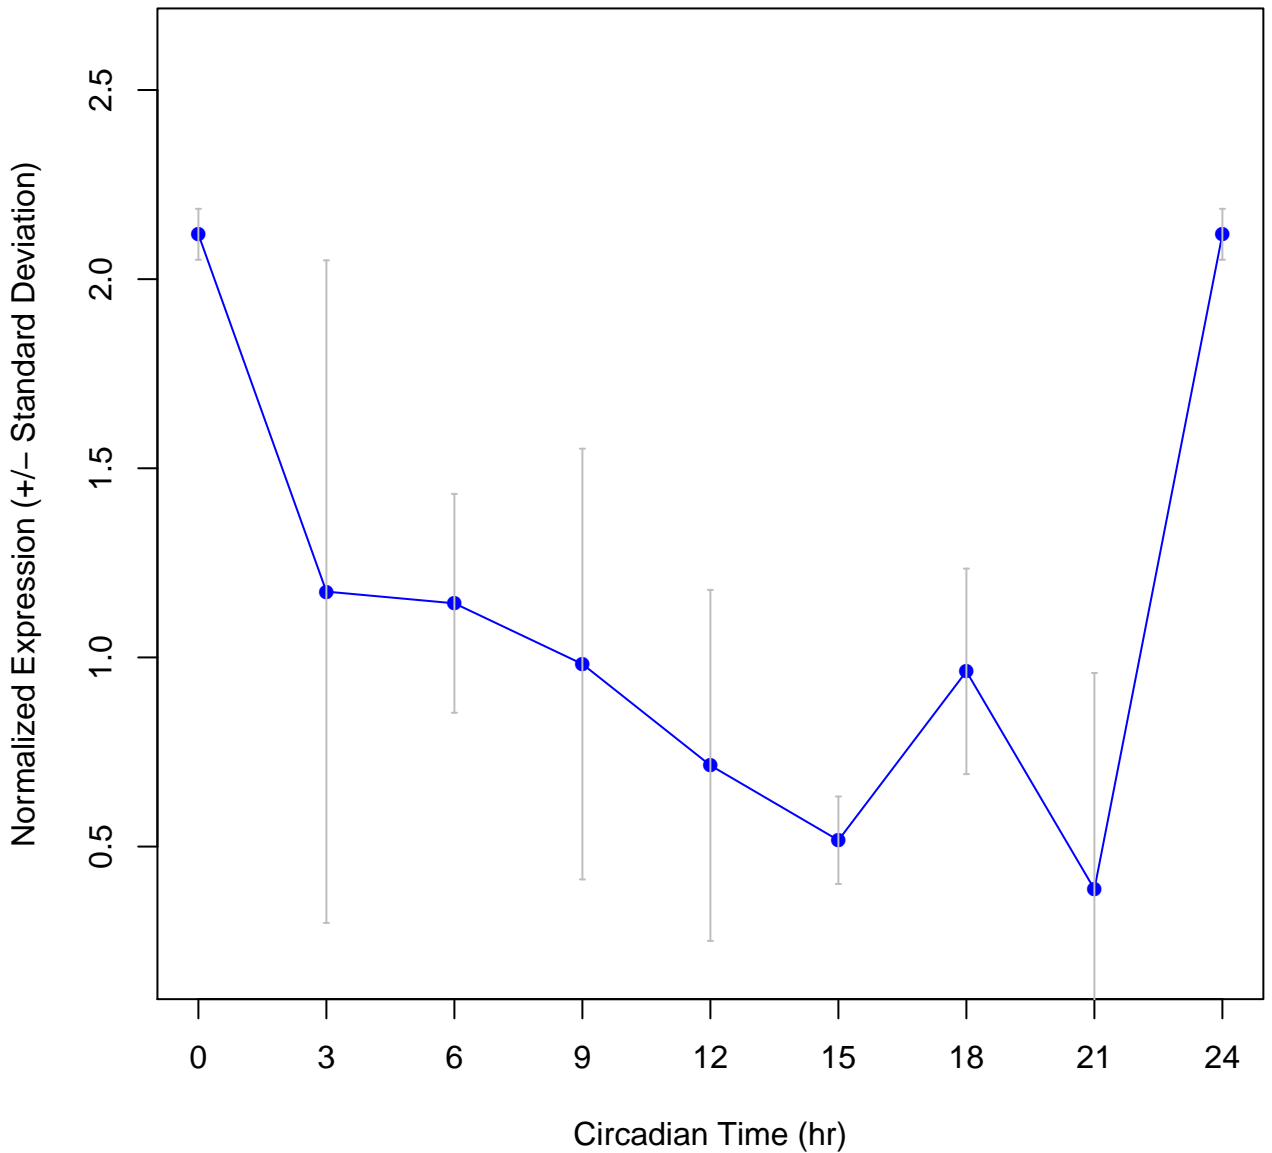

Supplement Figure 3 crtc2

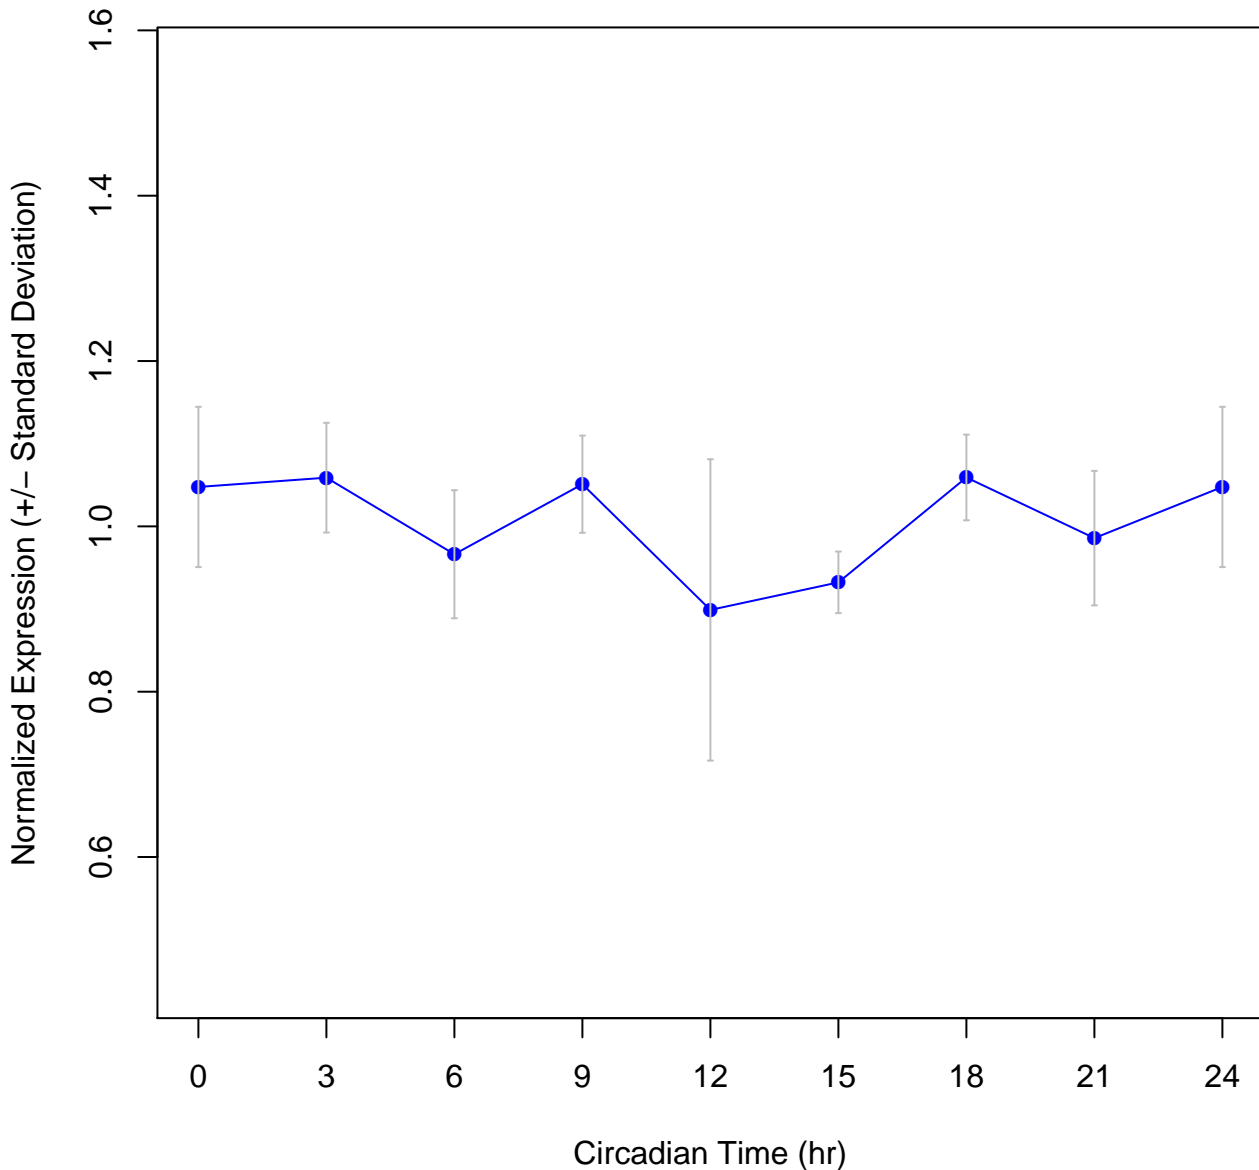

Supplement Figure 3 cry1

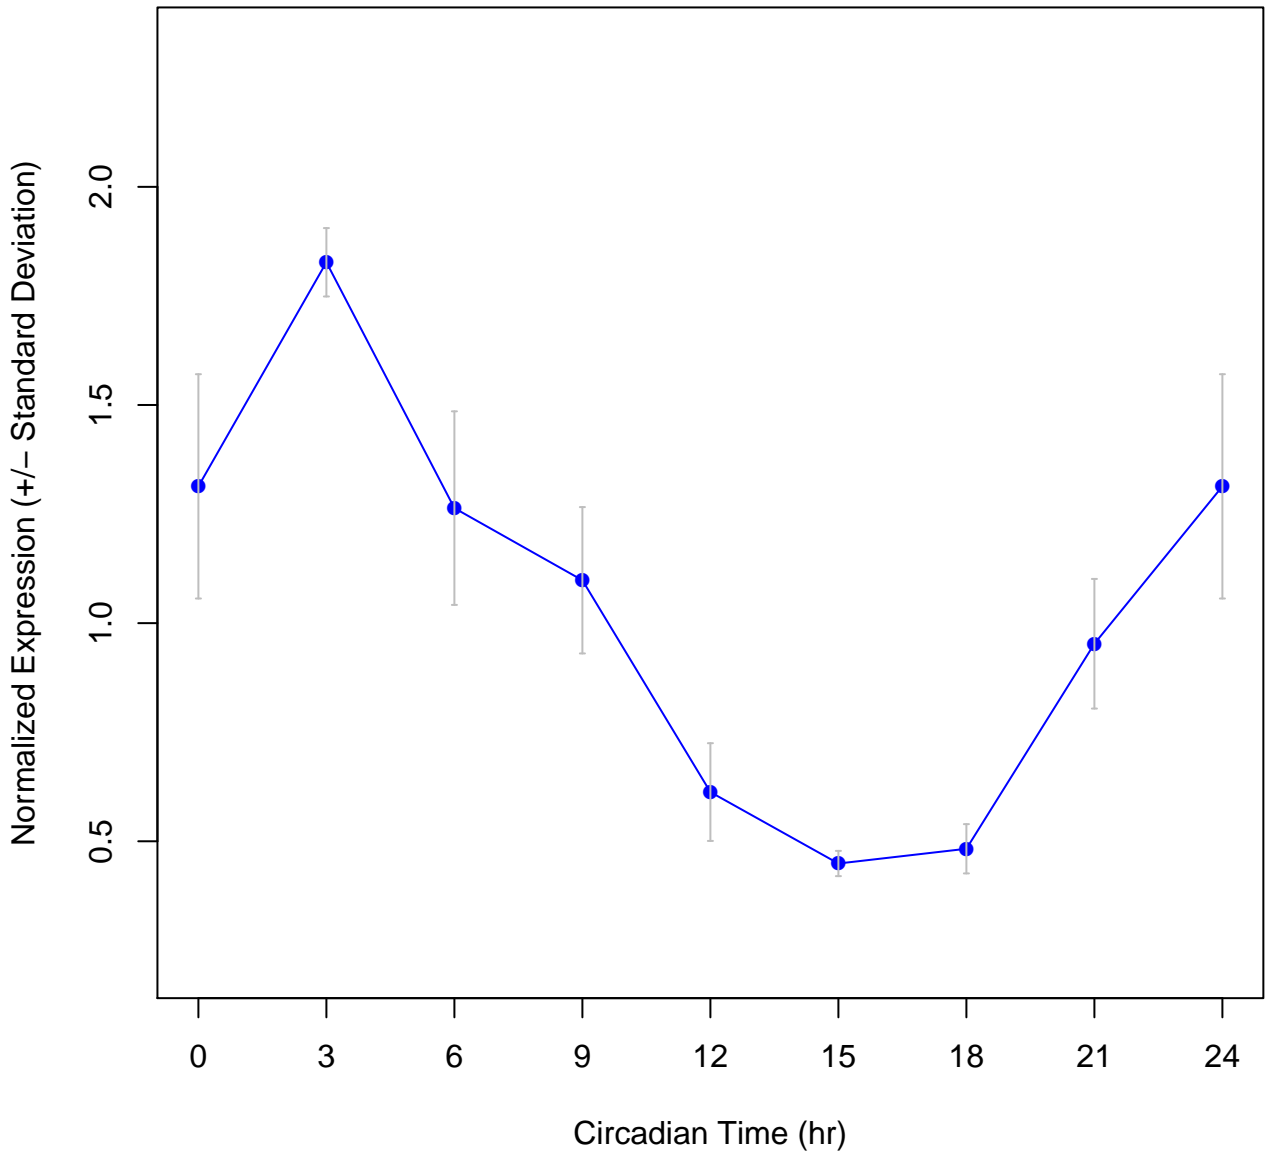

**Supplement Figure 3 cry2**

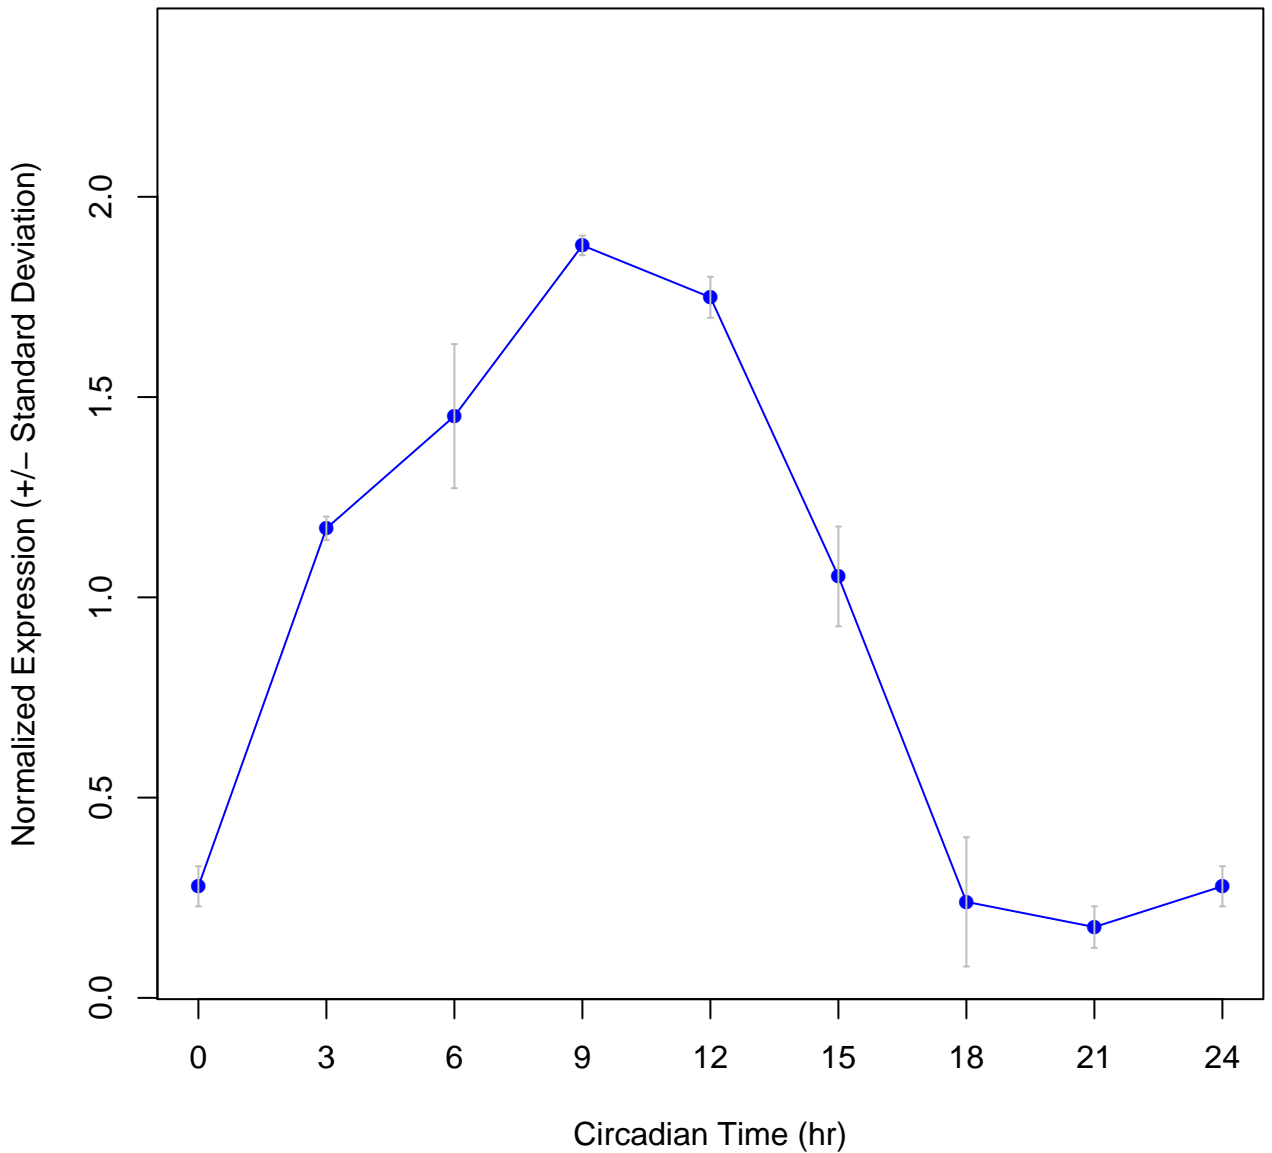

Supplement Figure 3 cry3

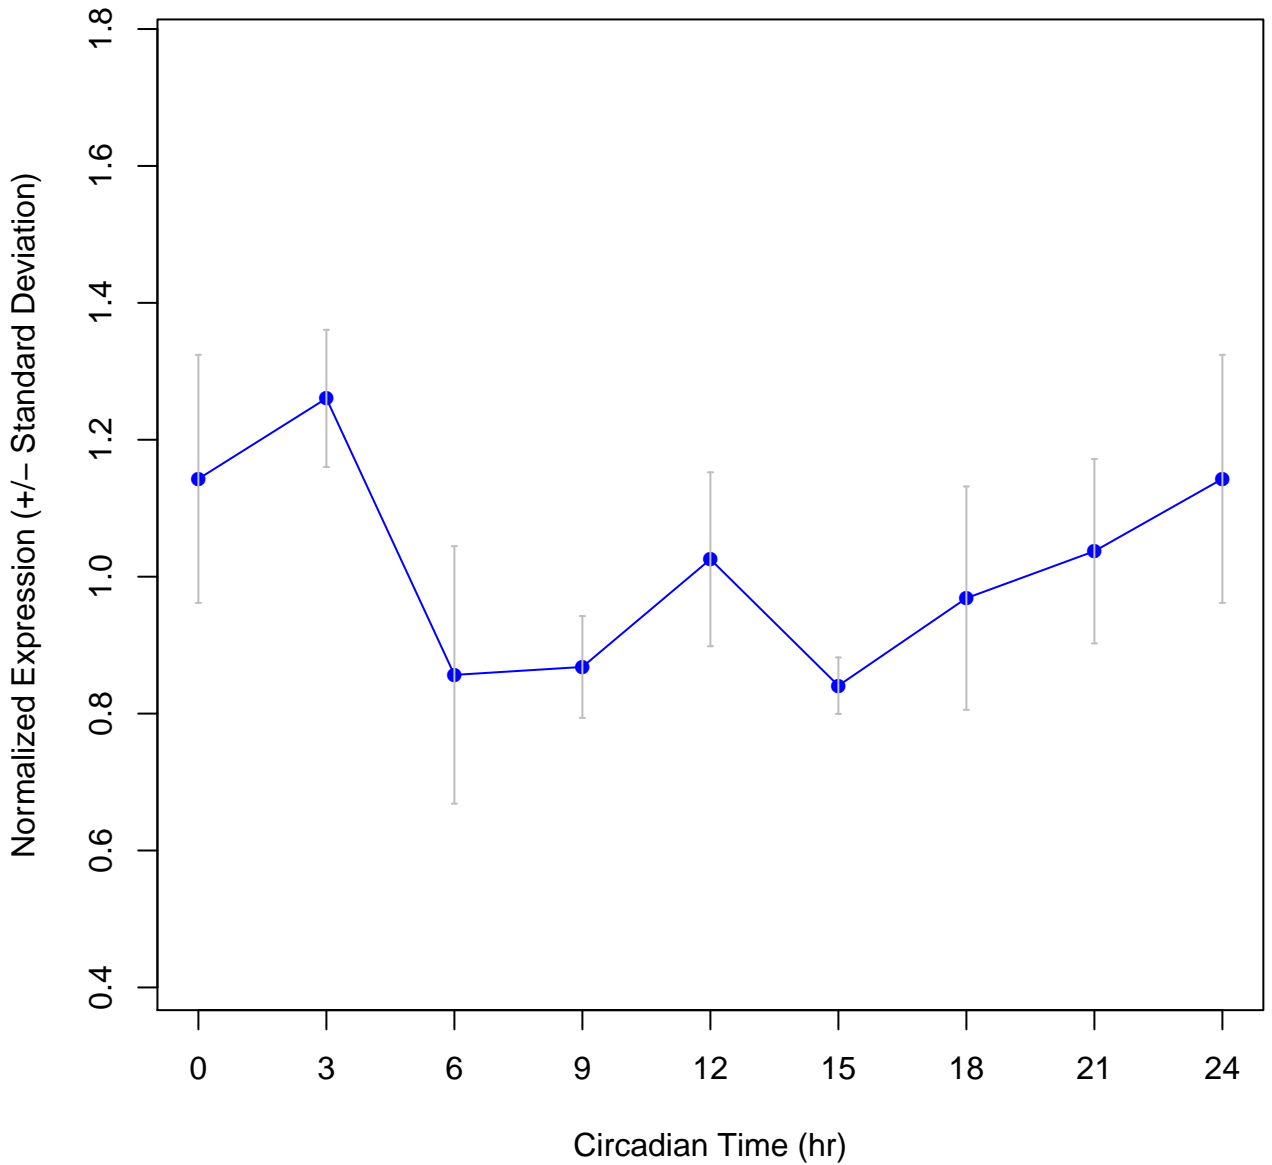

Supplement Figure 3 ctbp2

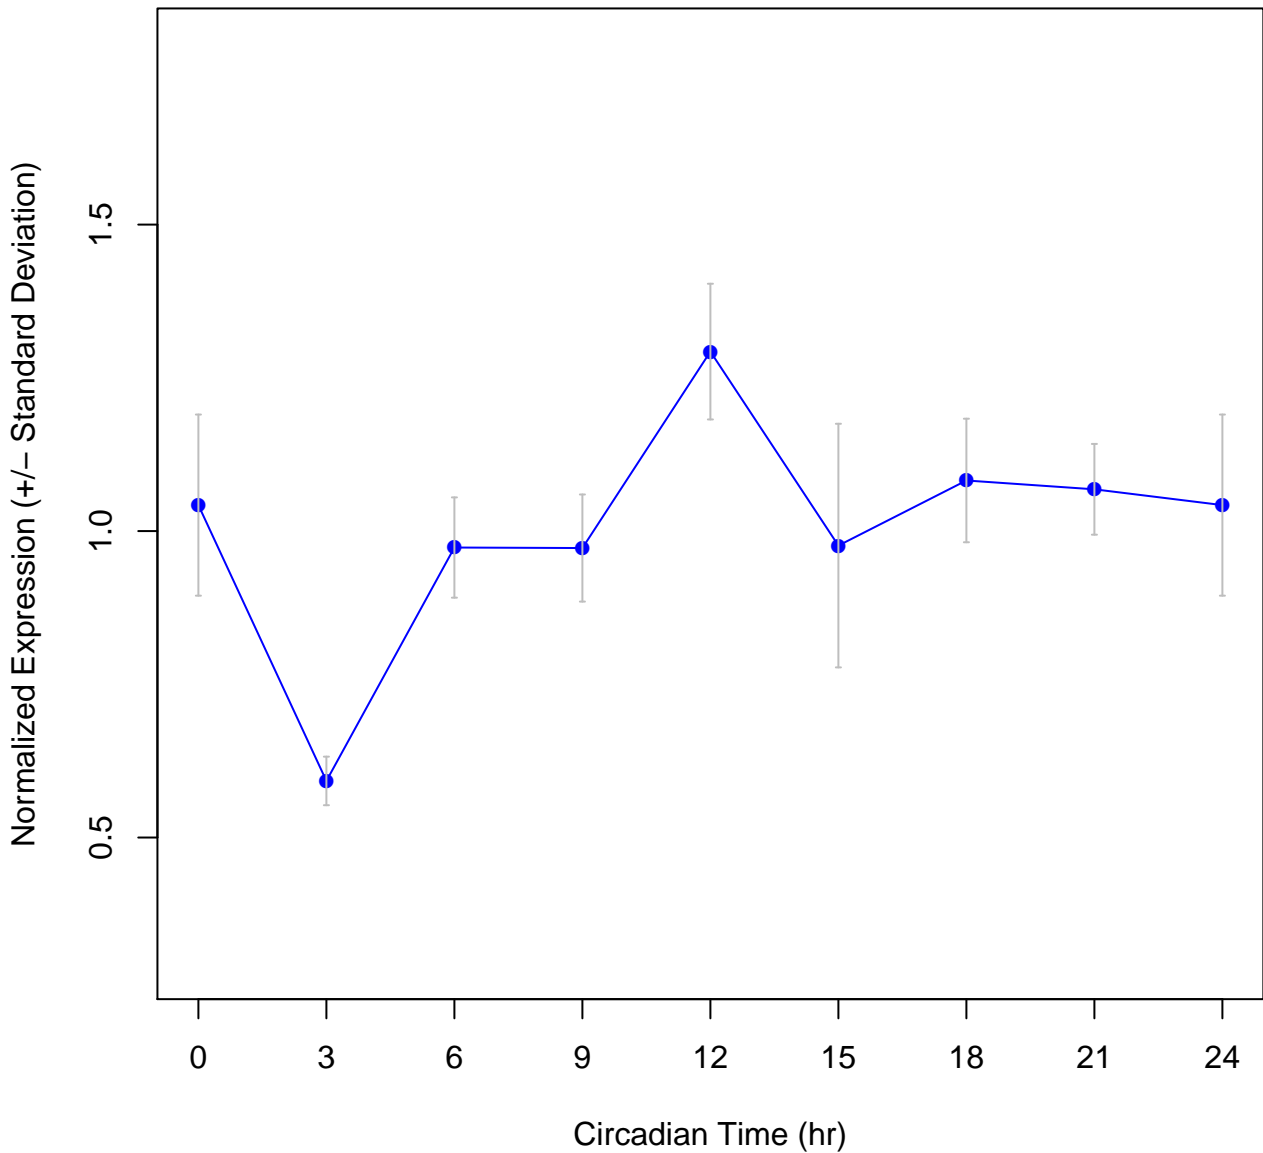

Supplement Figure 3 cul1

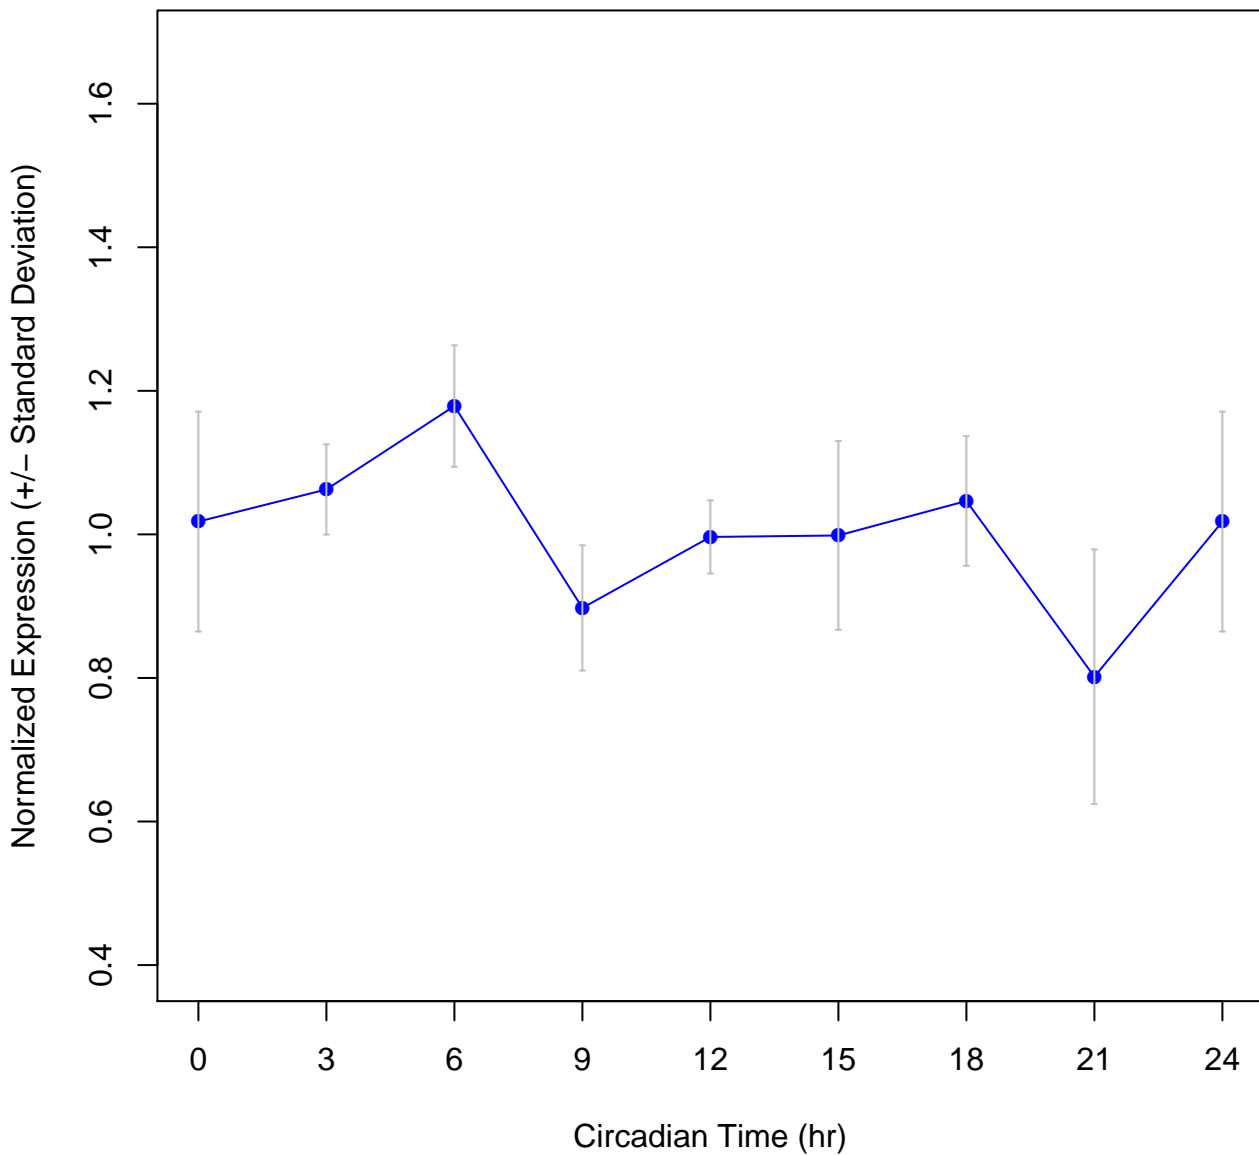



Supplement Figure 3 cyp1

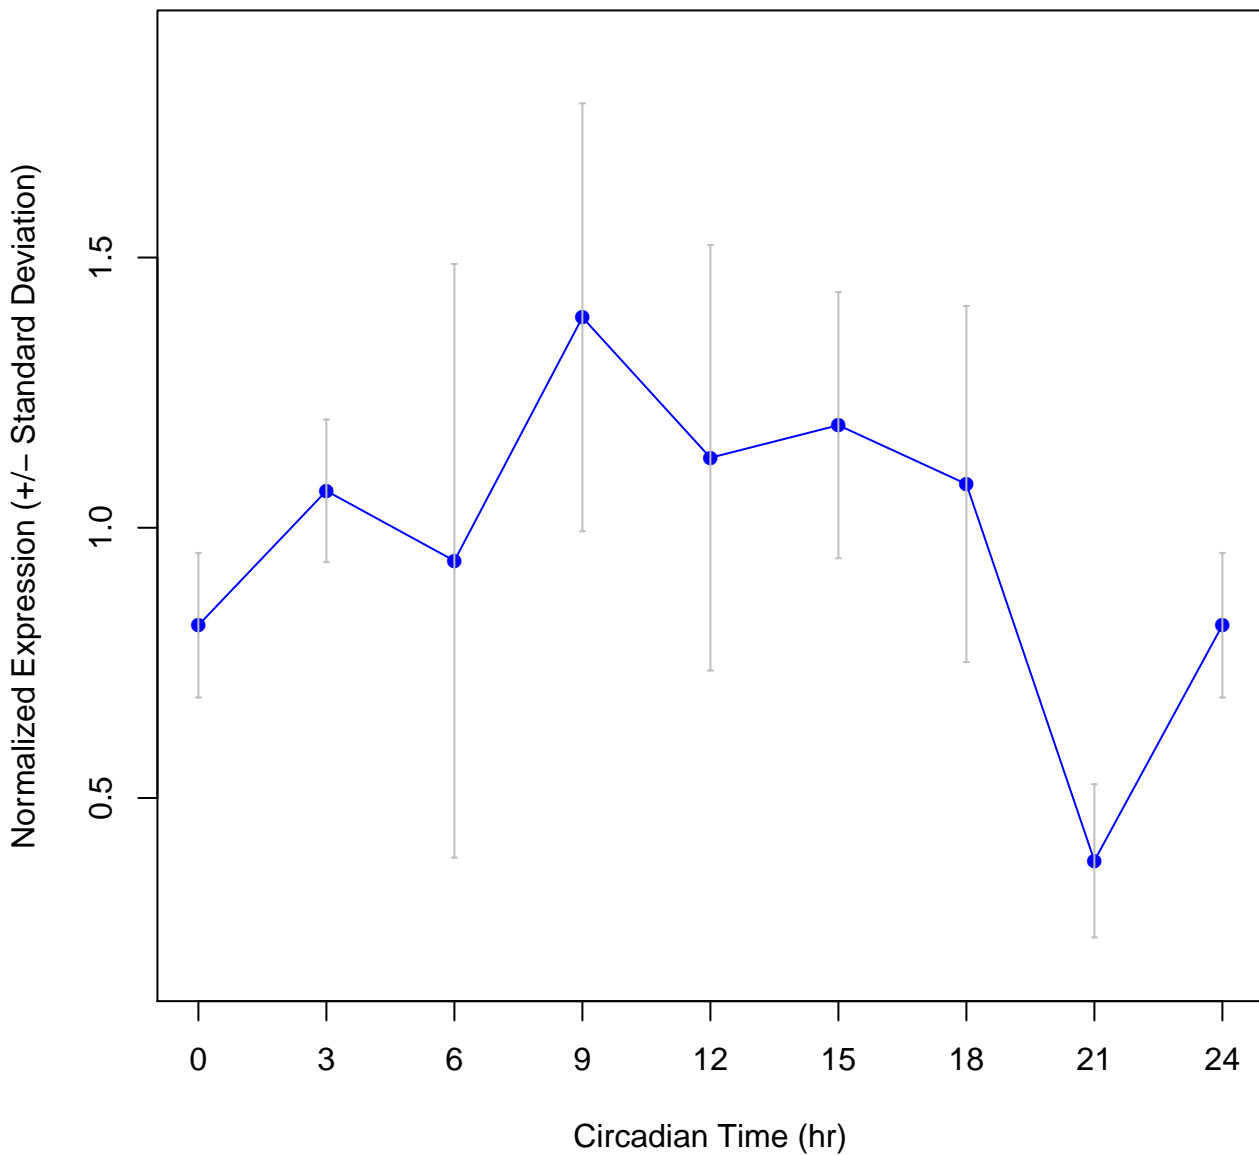

Supplement Figure 3 dct

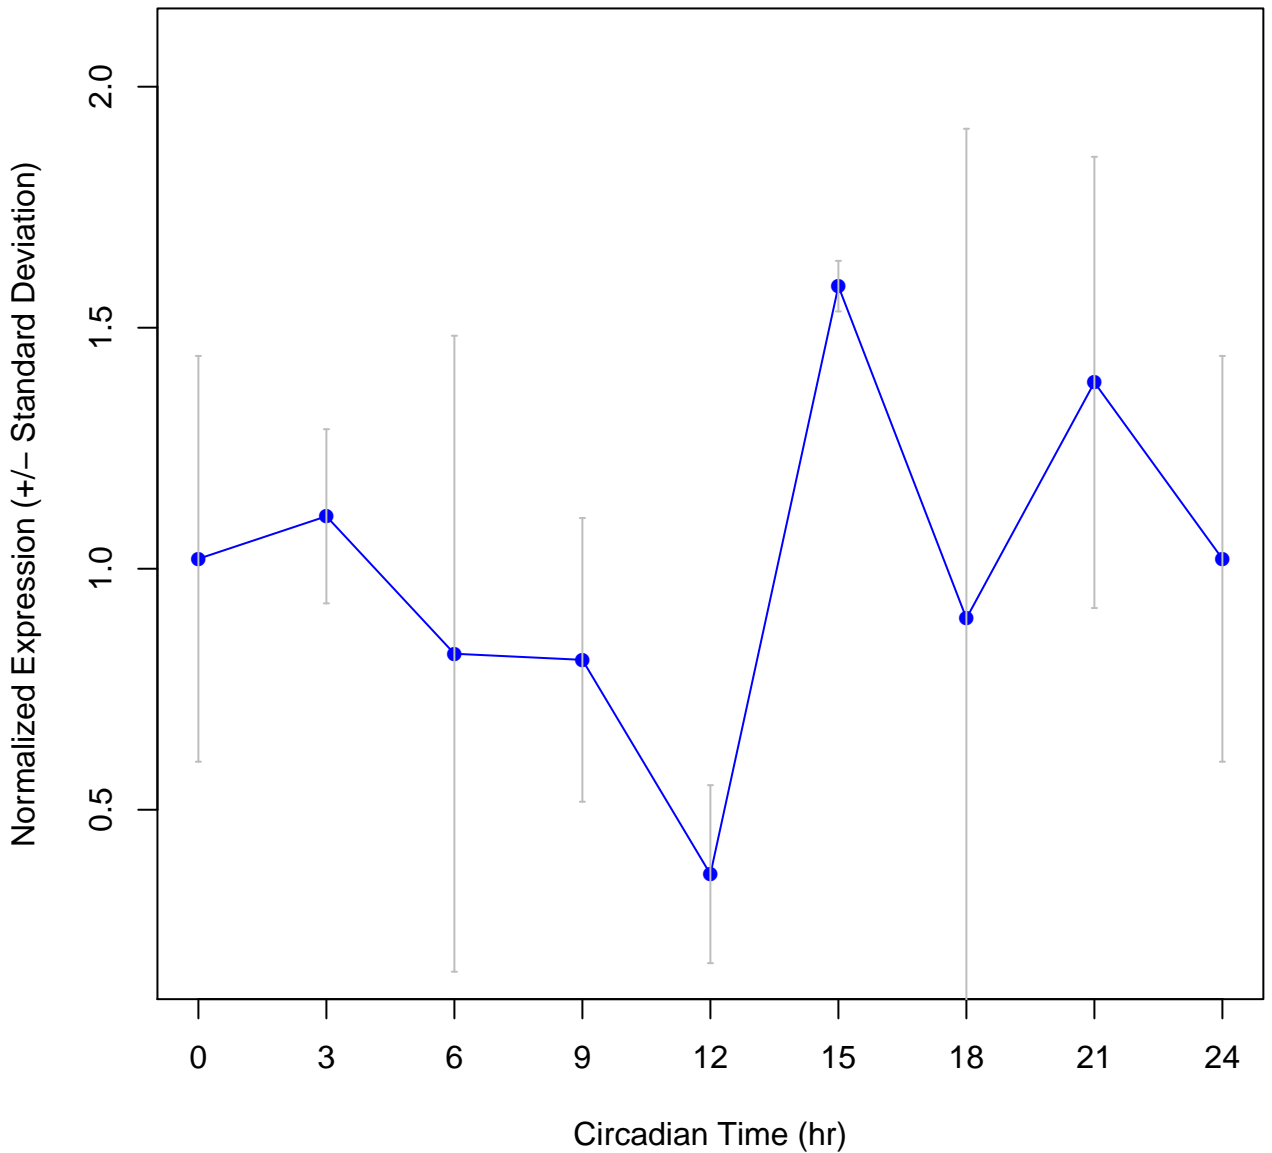

Supplement Figure 3 ddb1

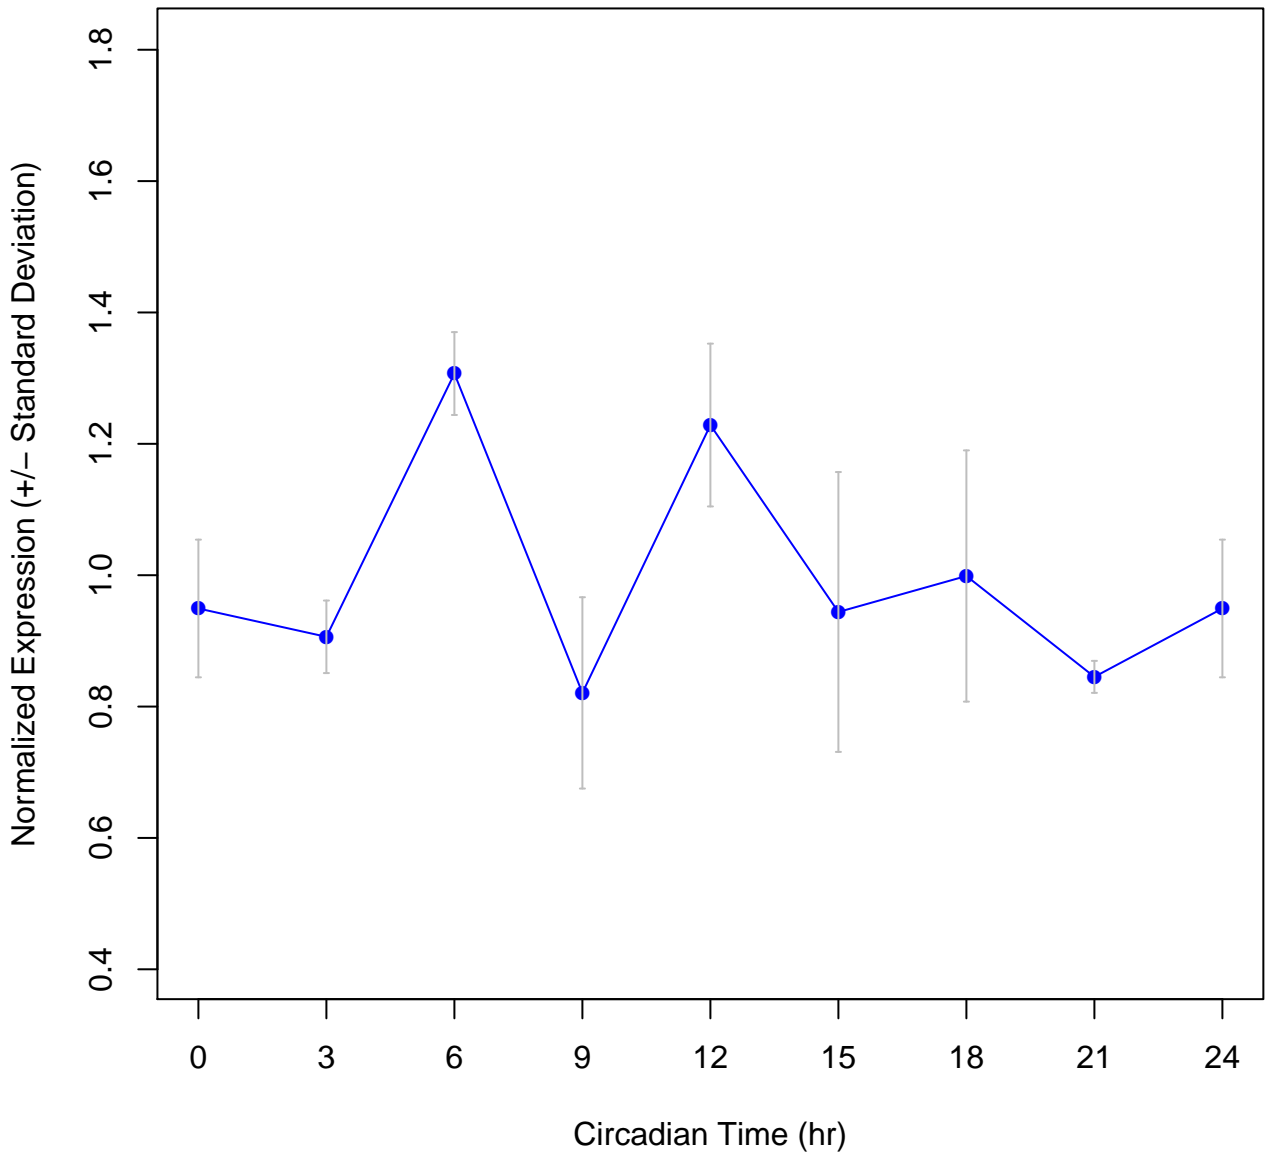

### Supplement Figure 3 ddb2

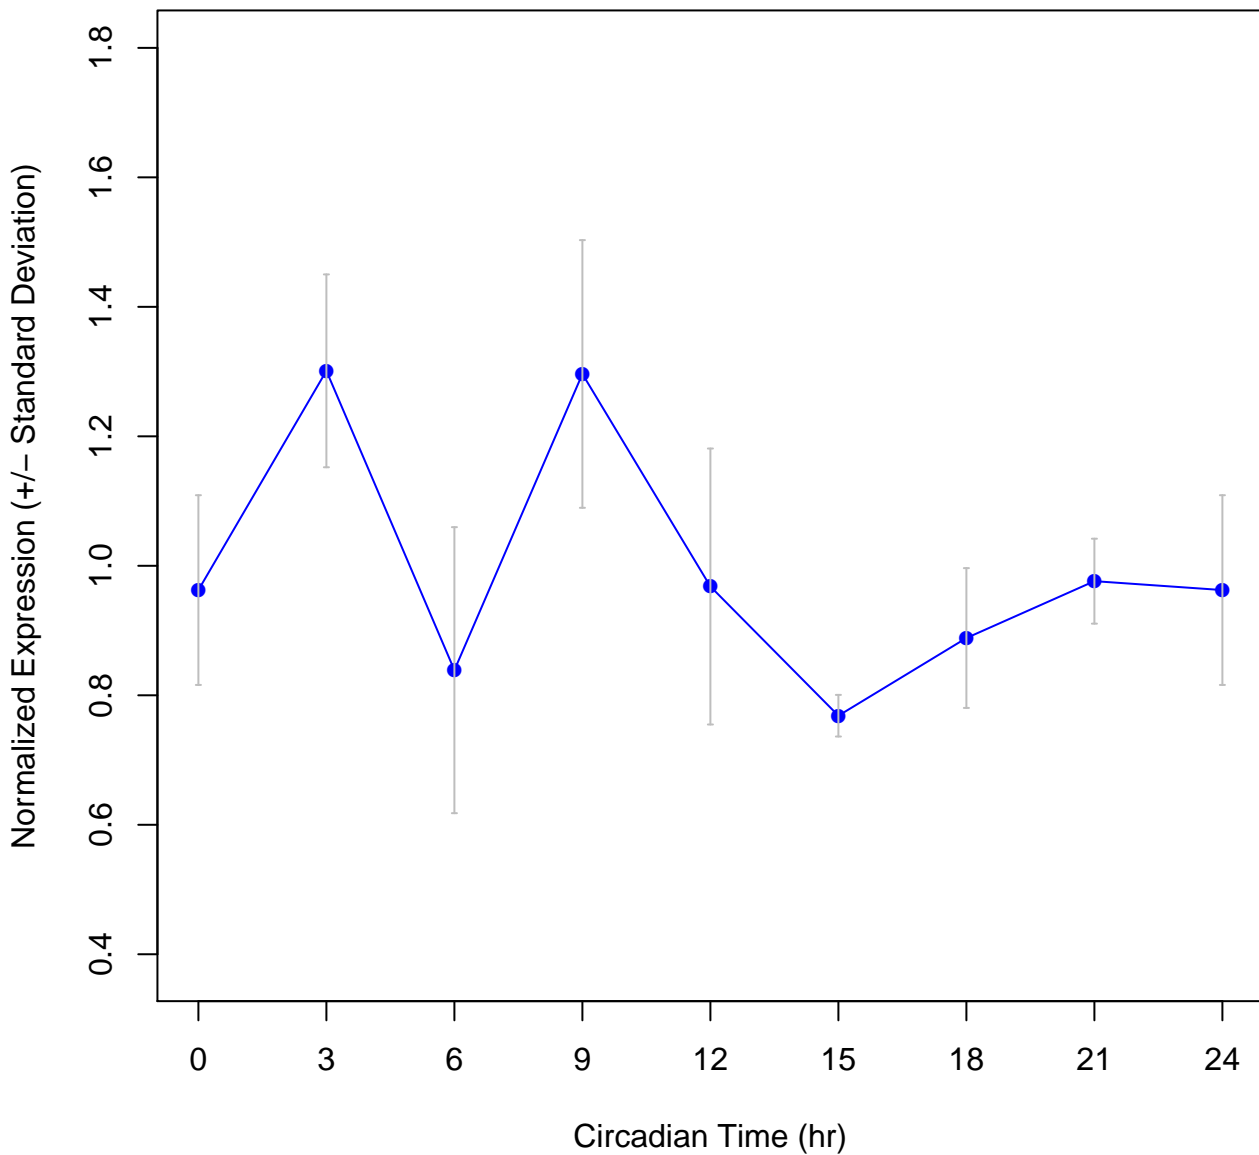

### Supplement Figure 3 dio3

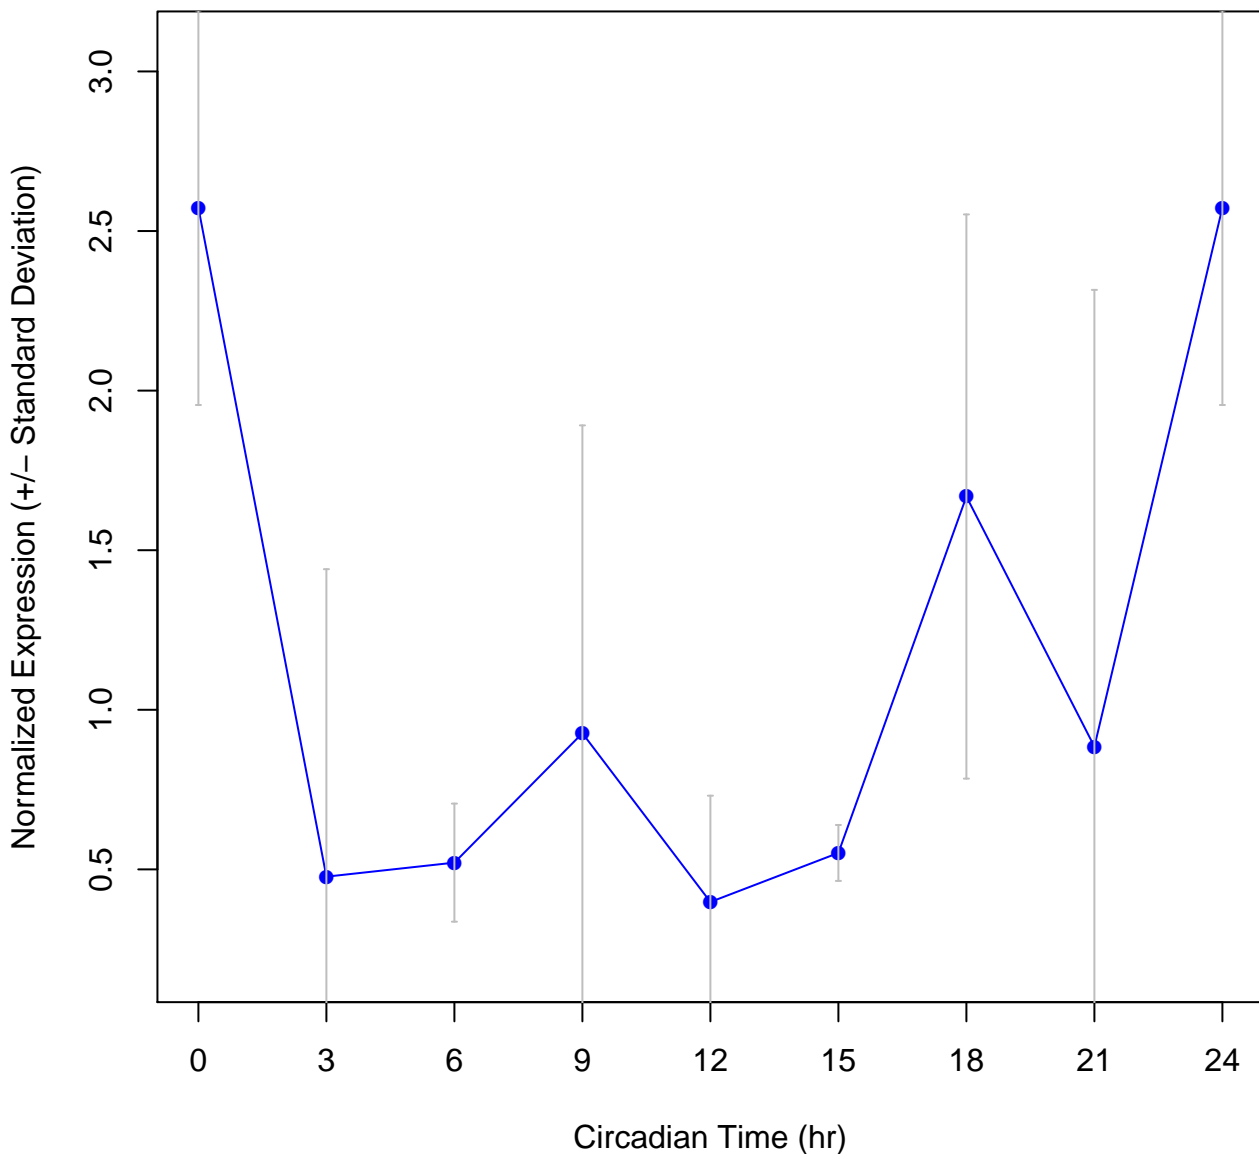

Supplement Figure 3 dnah7

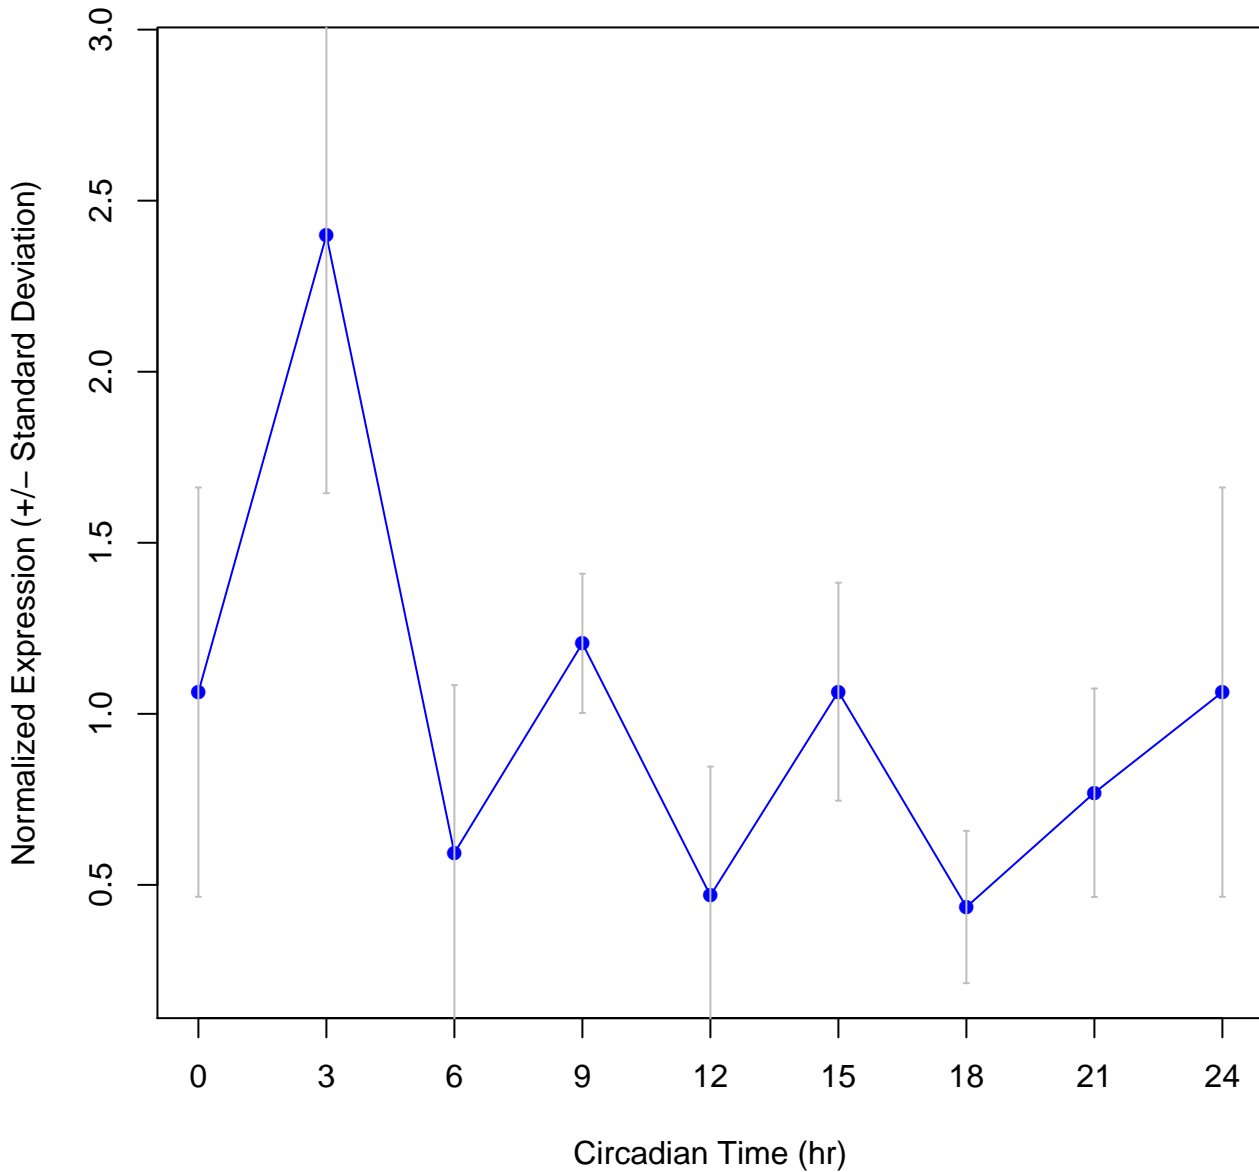

### Supplement Figure 3 dnajb4

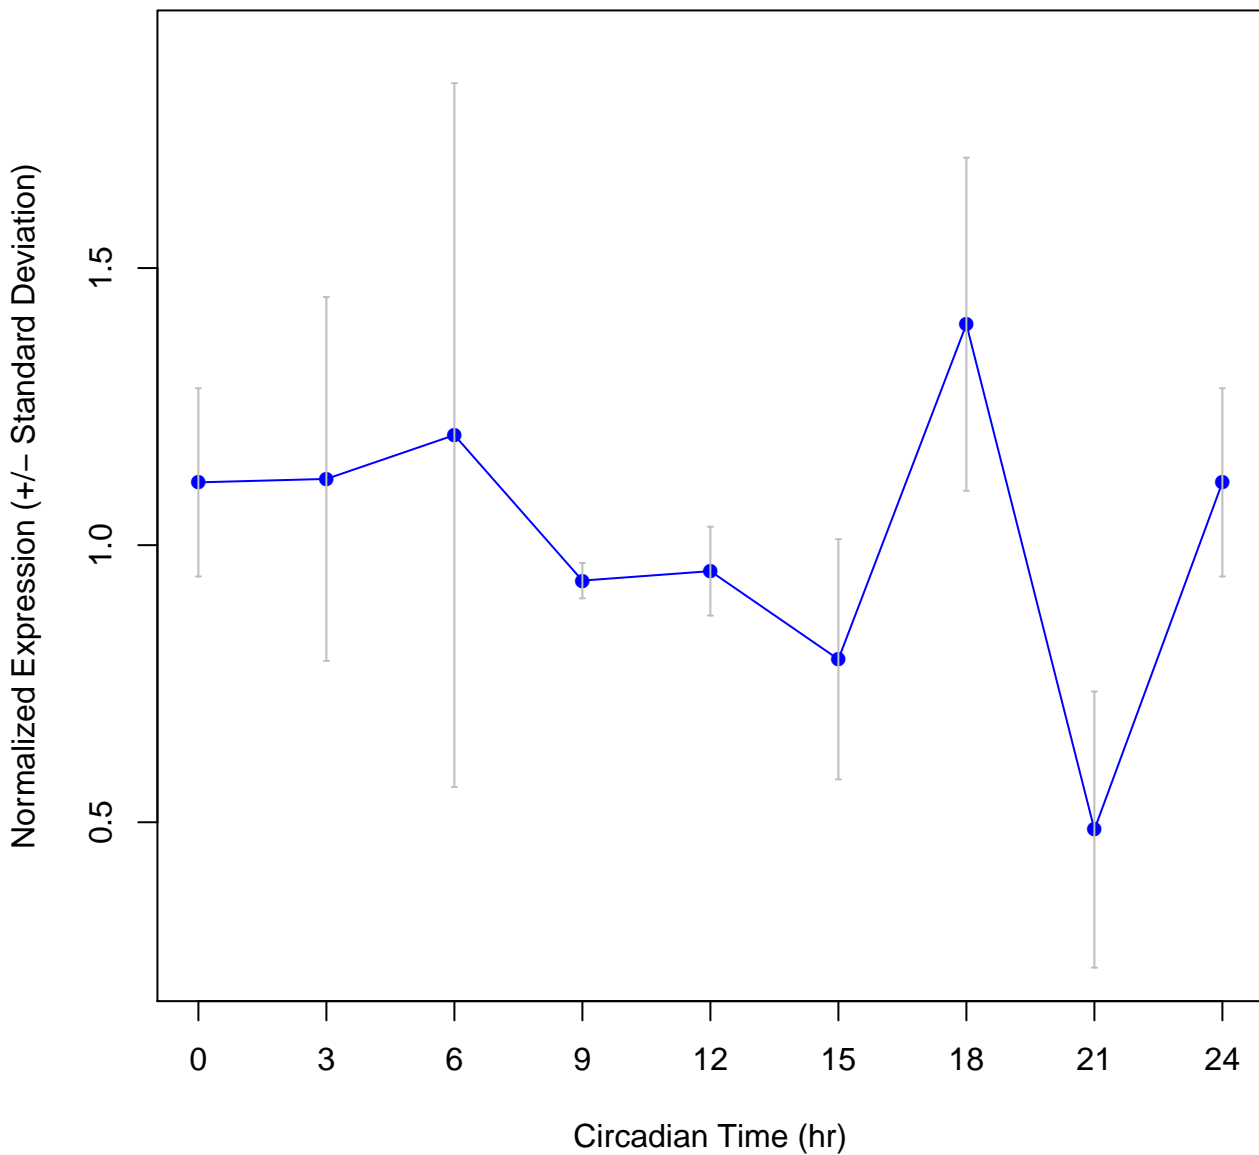

Supplement Figure 3 dscam1

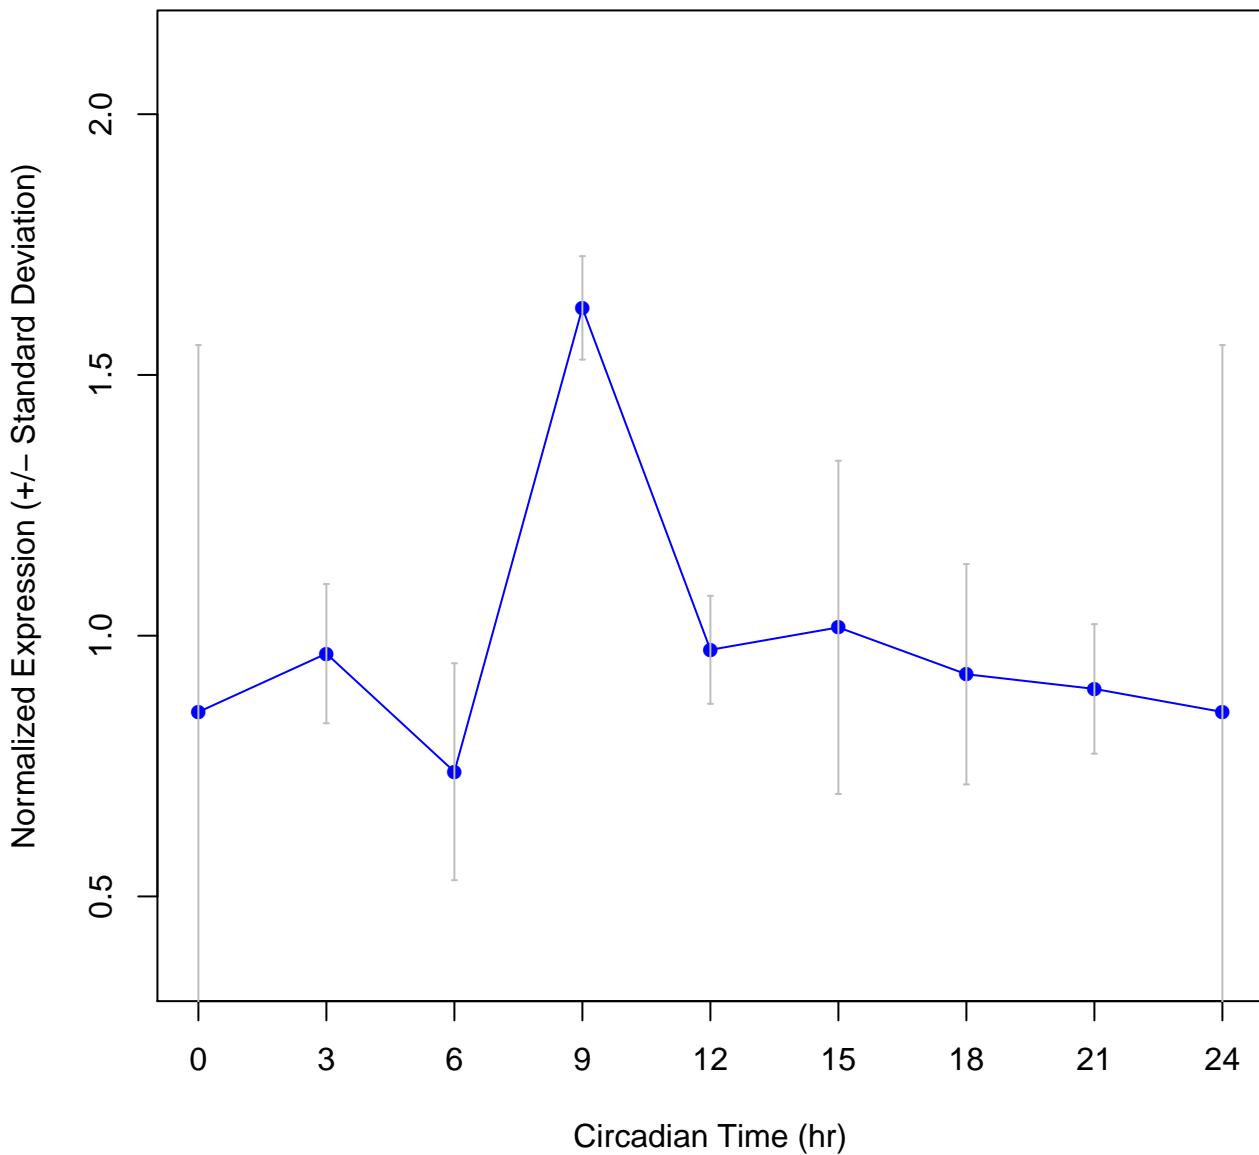



Supplement Figure 3 e2f

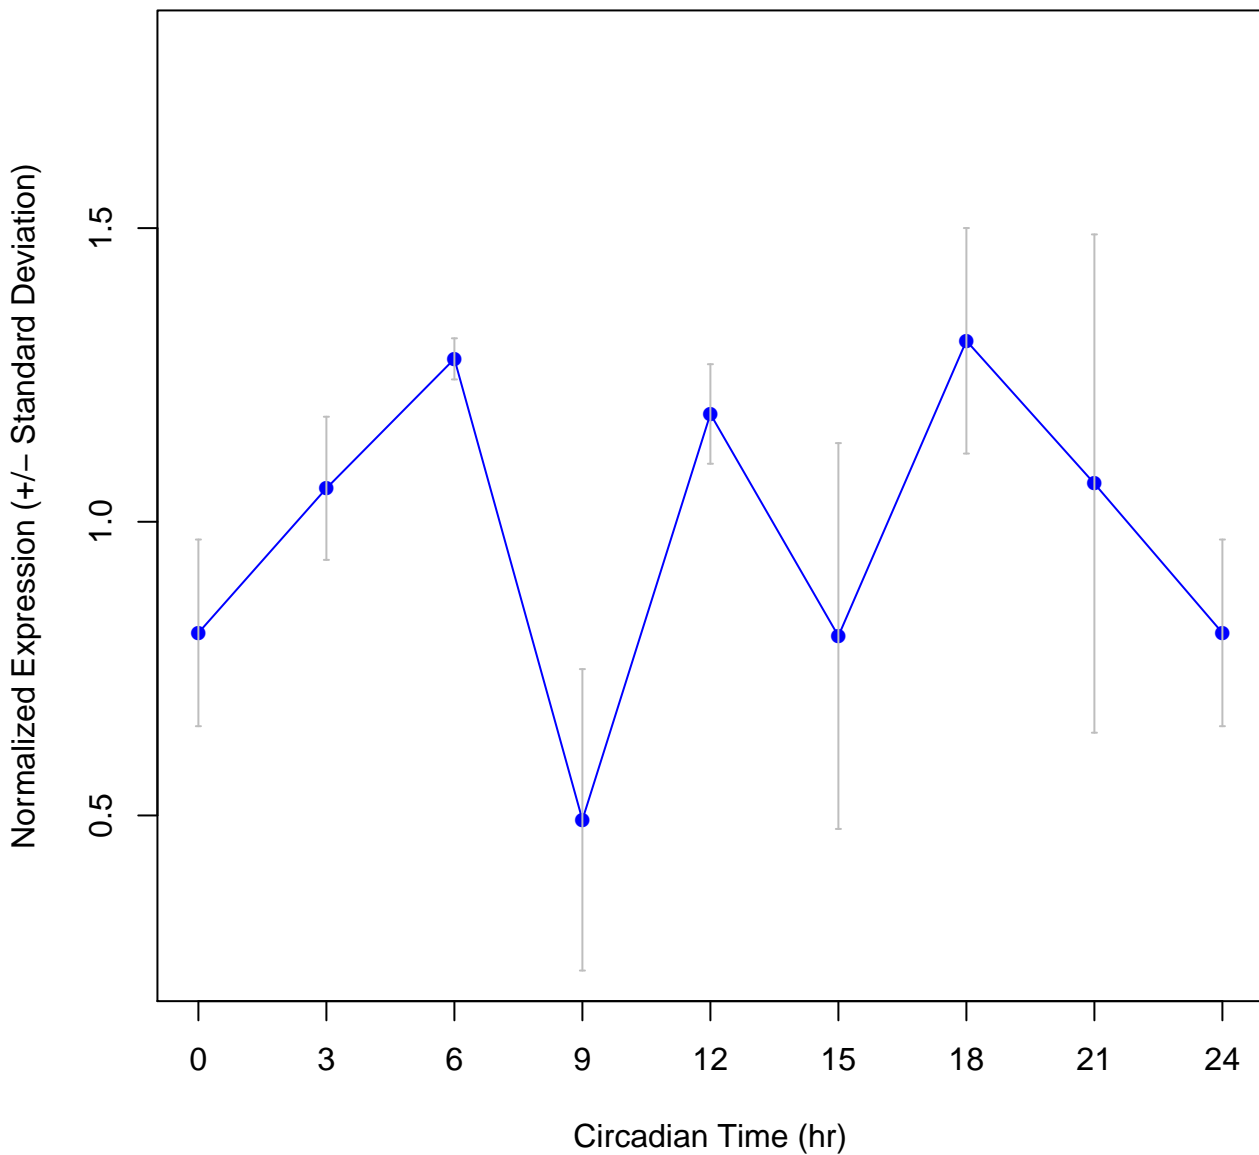

**Supplement Figure 3 ect2**

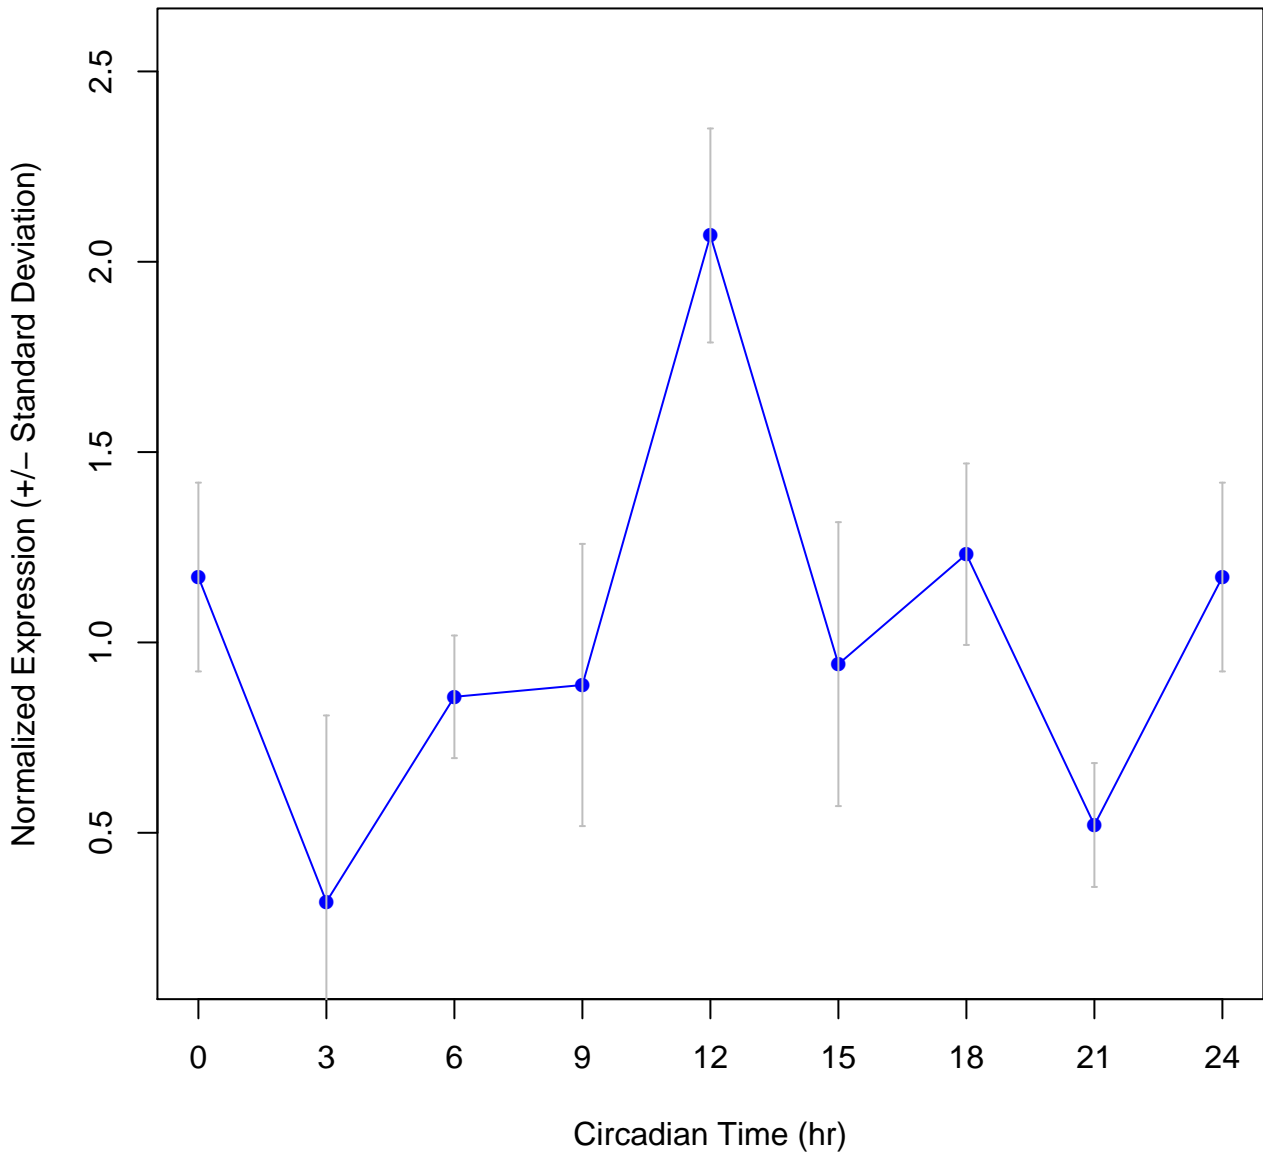

Supplement Figure 3 enox1

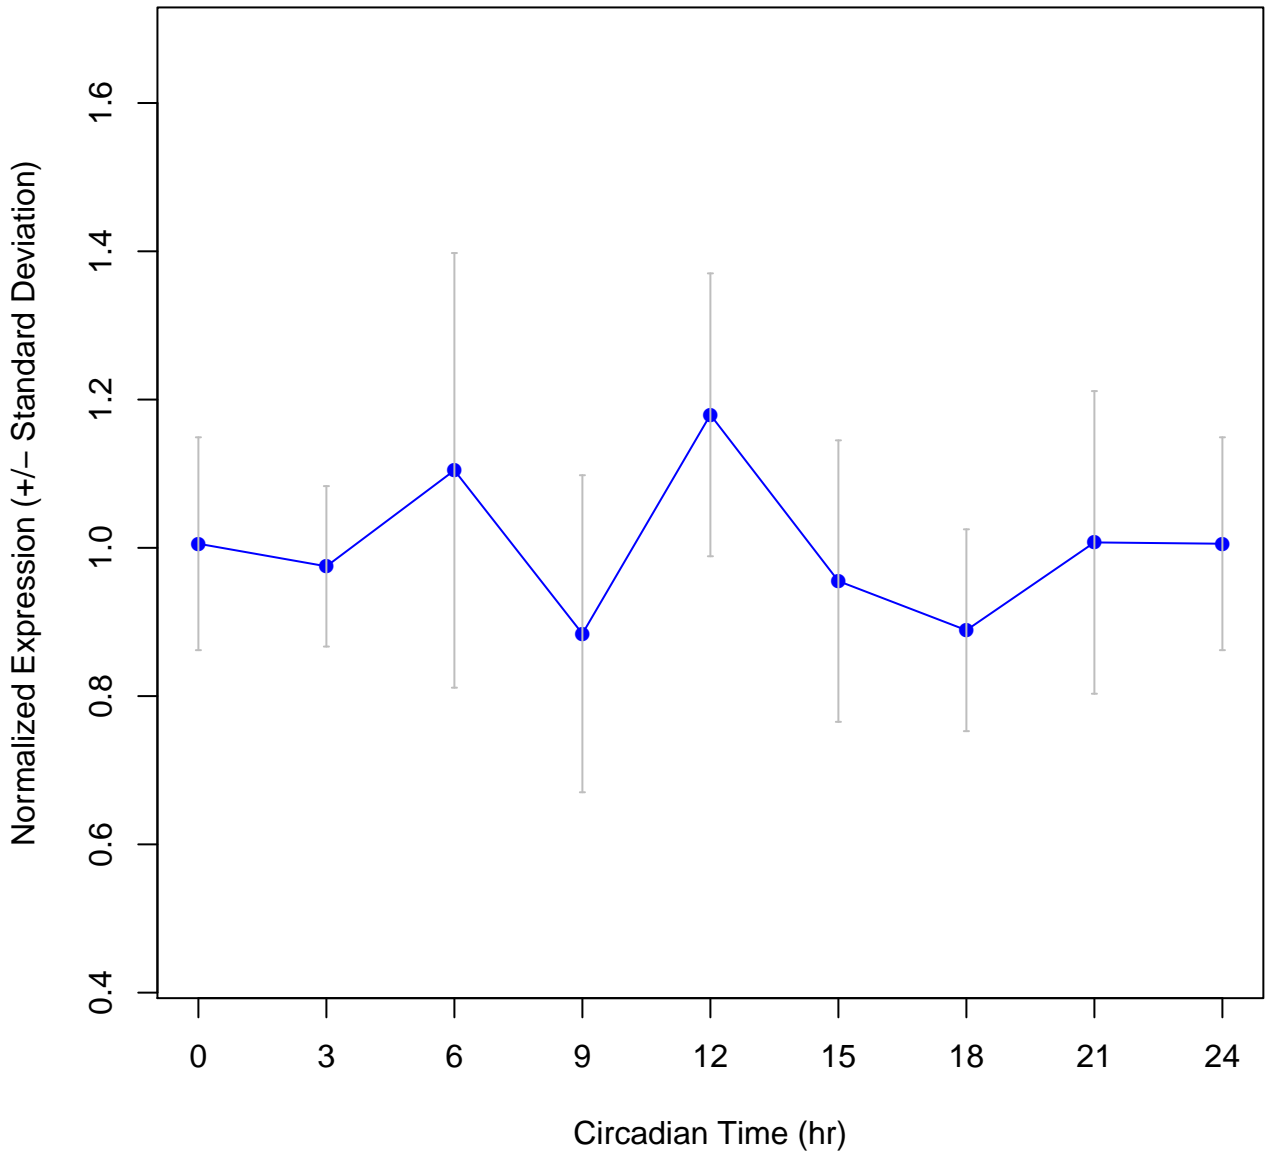

**Supplement Figure 3 enox2**

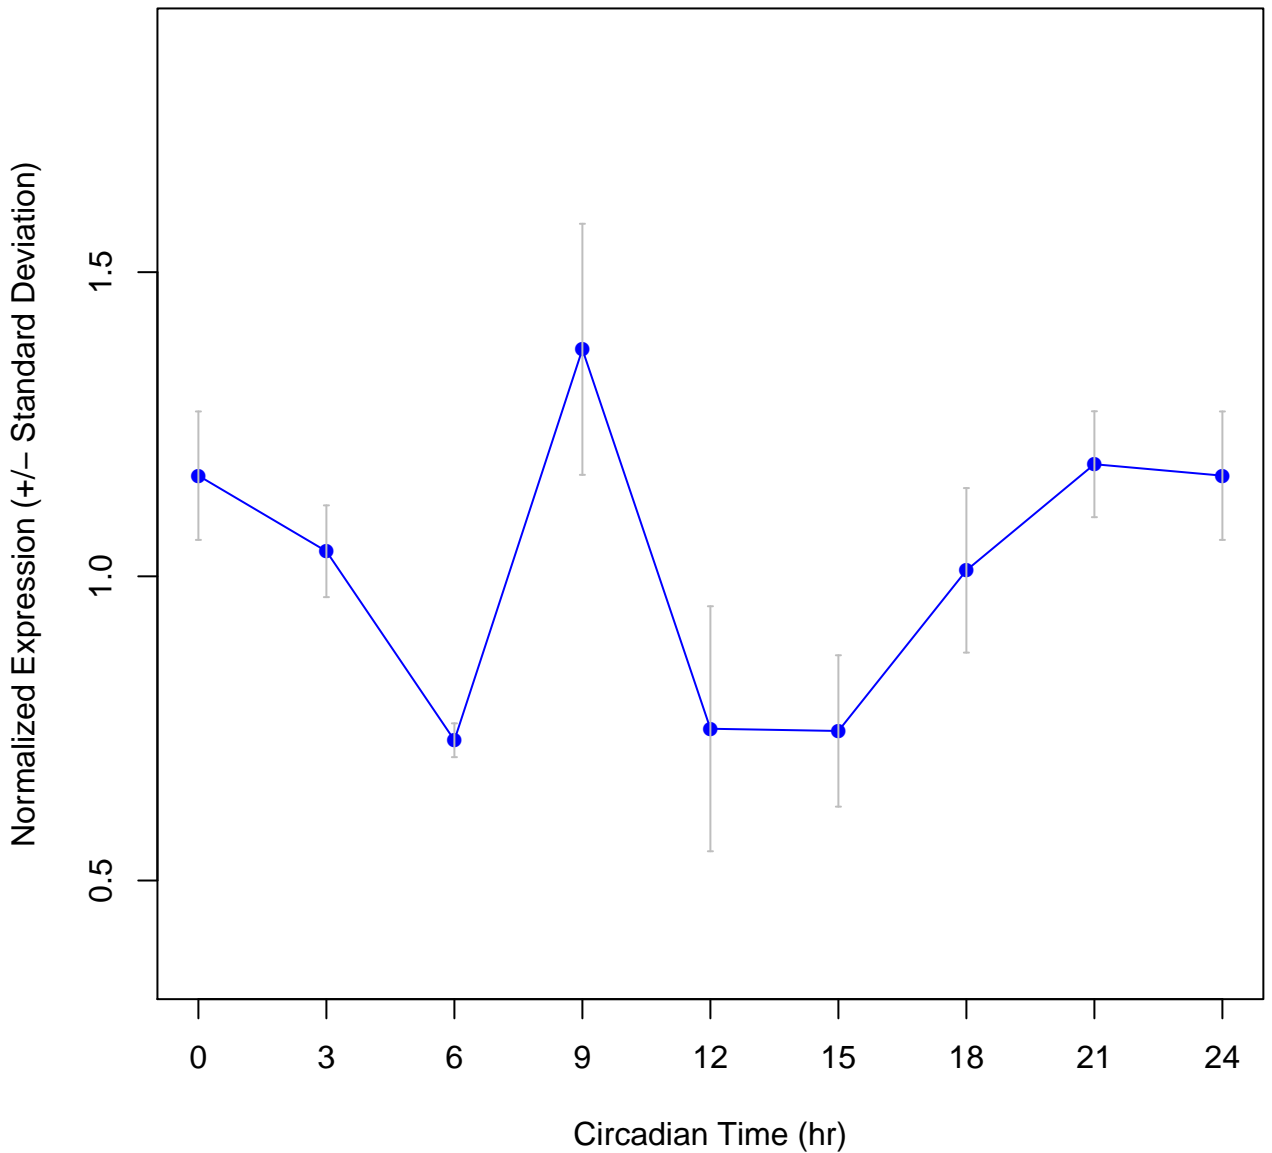

**Supplement Figure 3 ensxmag00000013922**

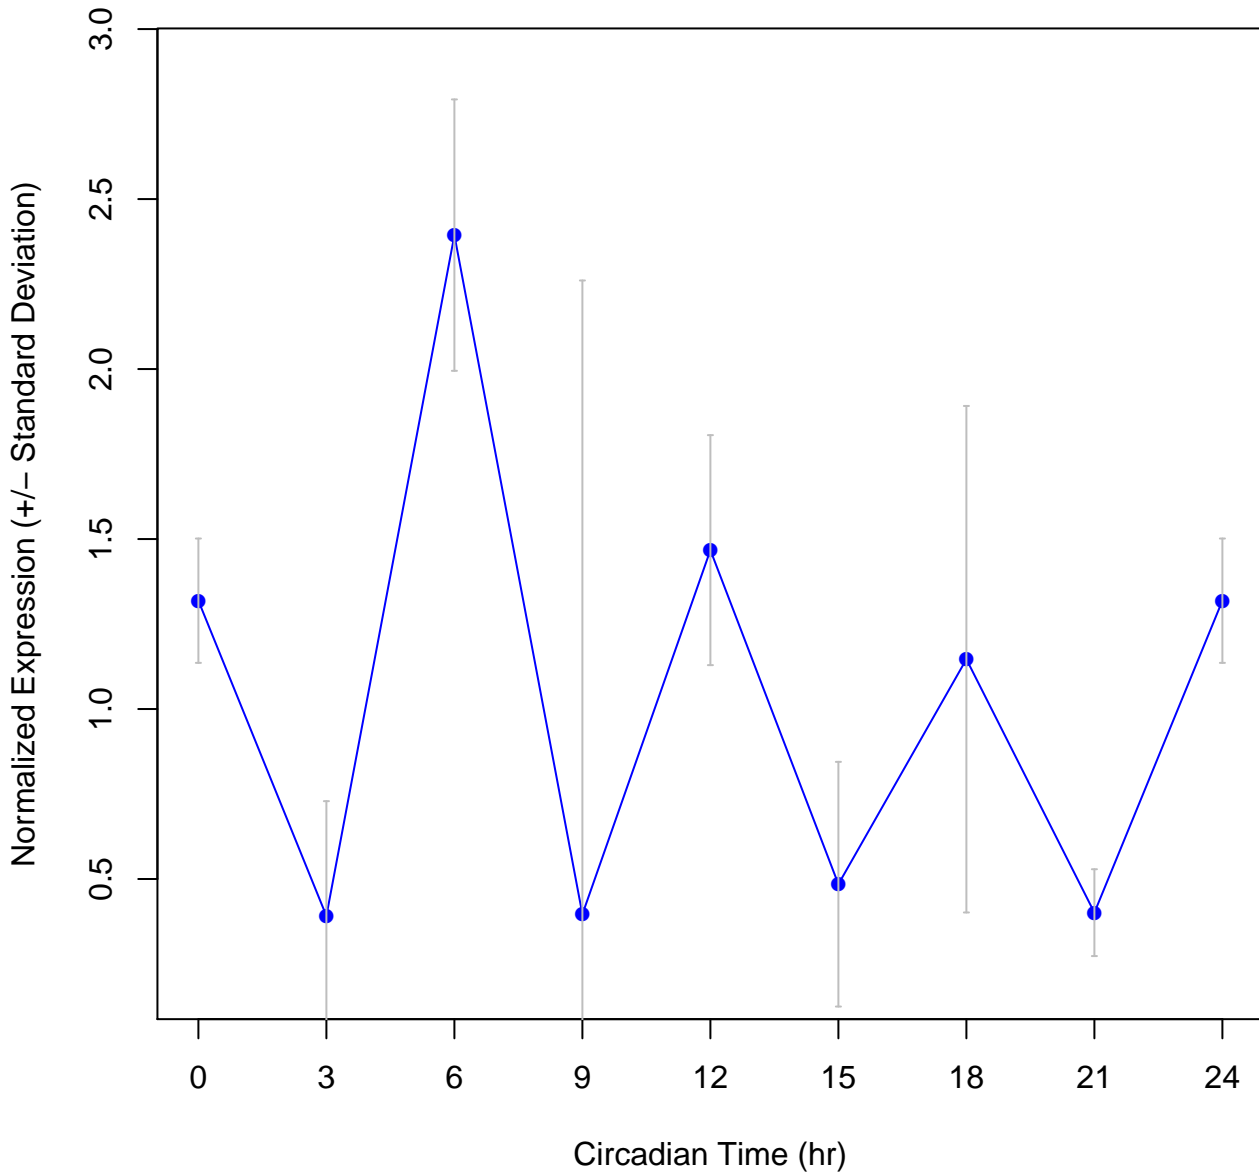

**Supplement Figure 3 ensxmag00000017815**

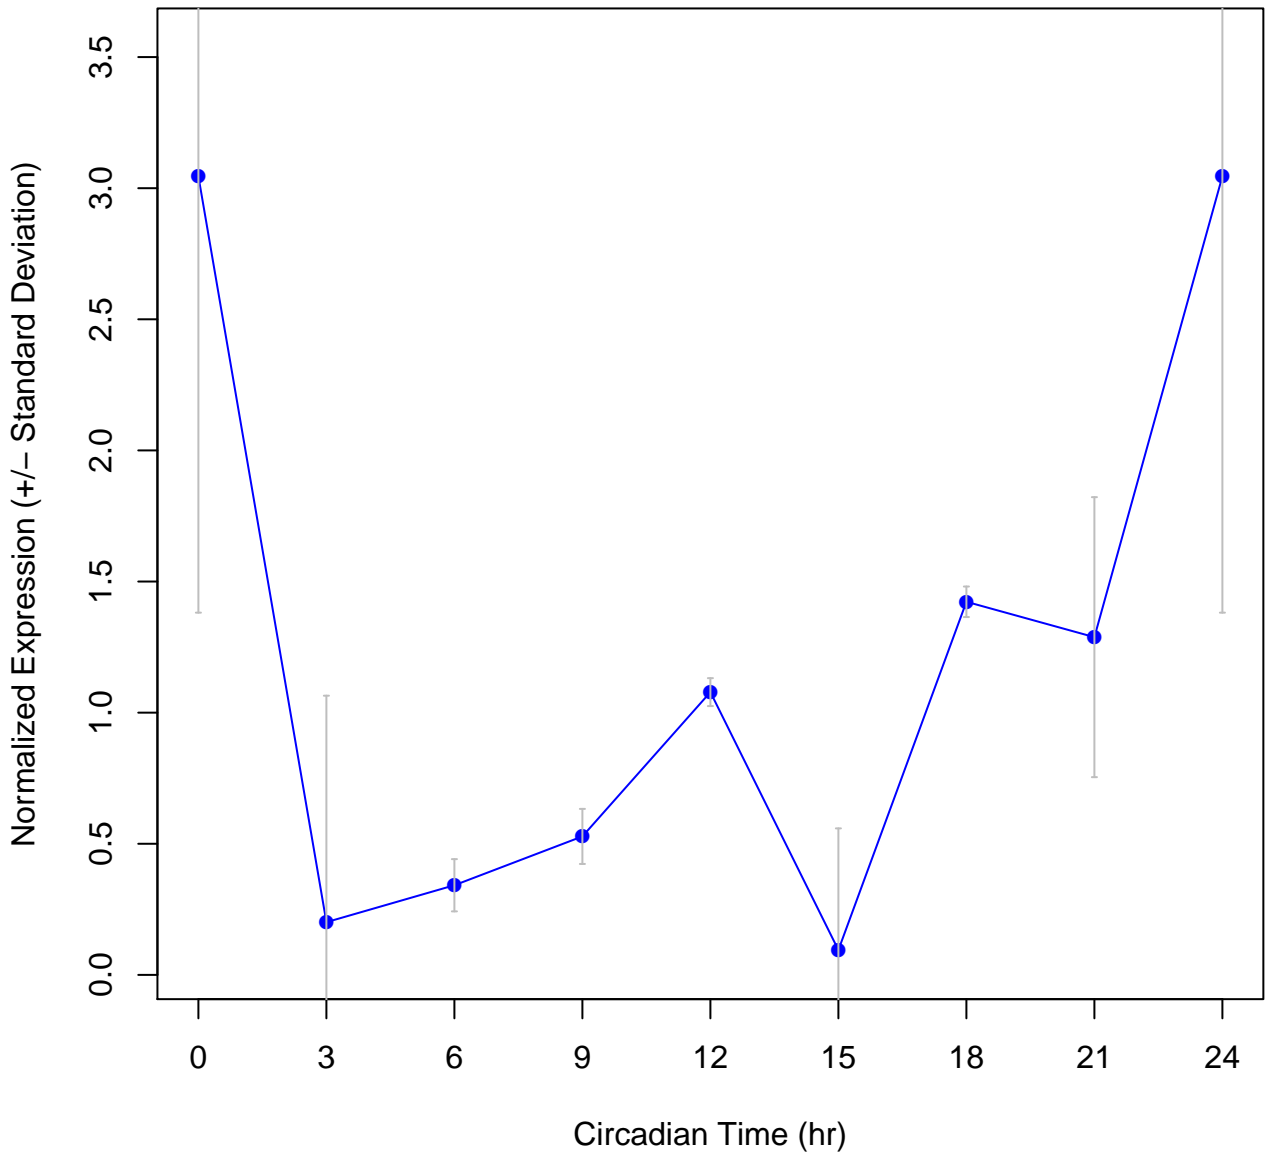

### Supplement Figure 3 ercc3

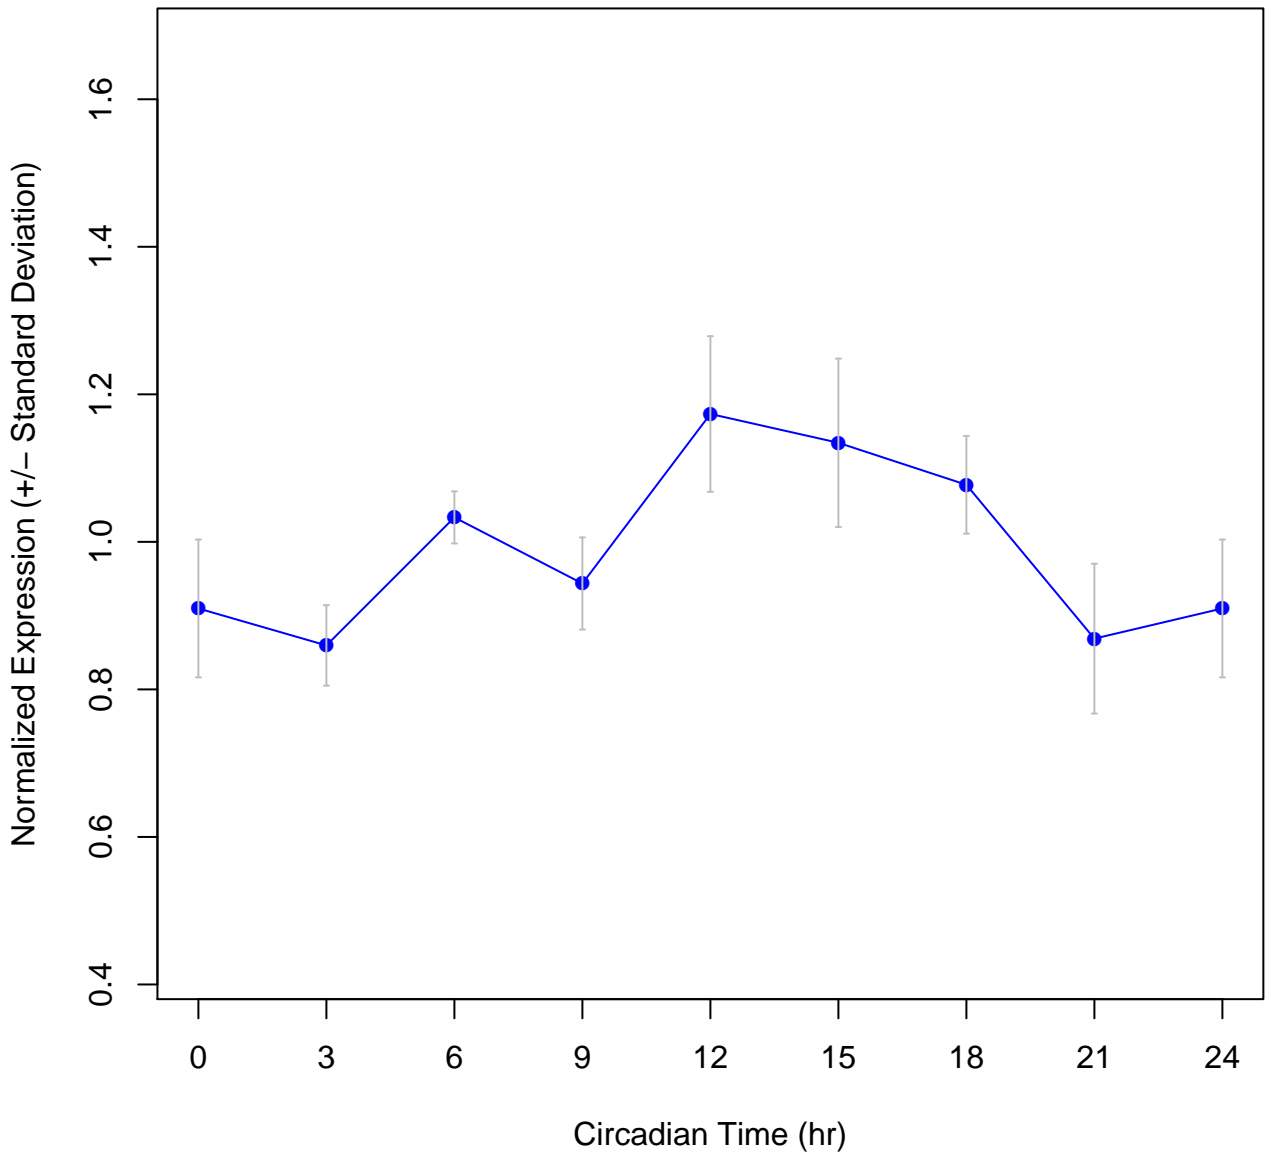

Supplement Figure 3 esp11

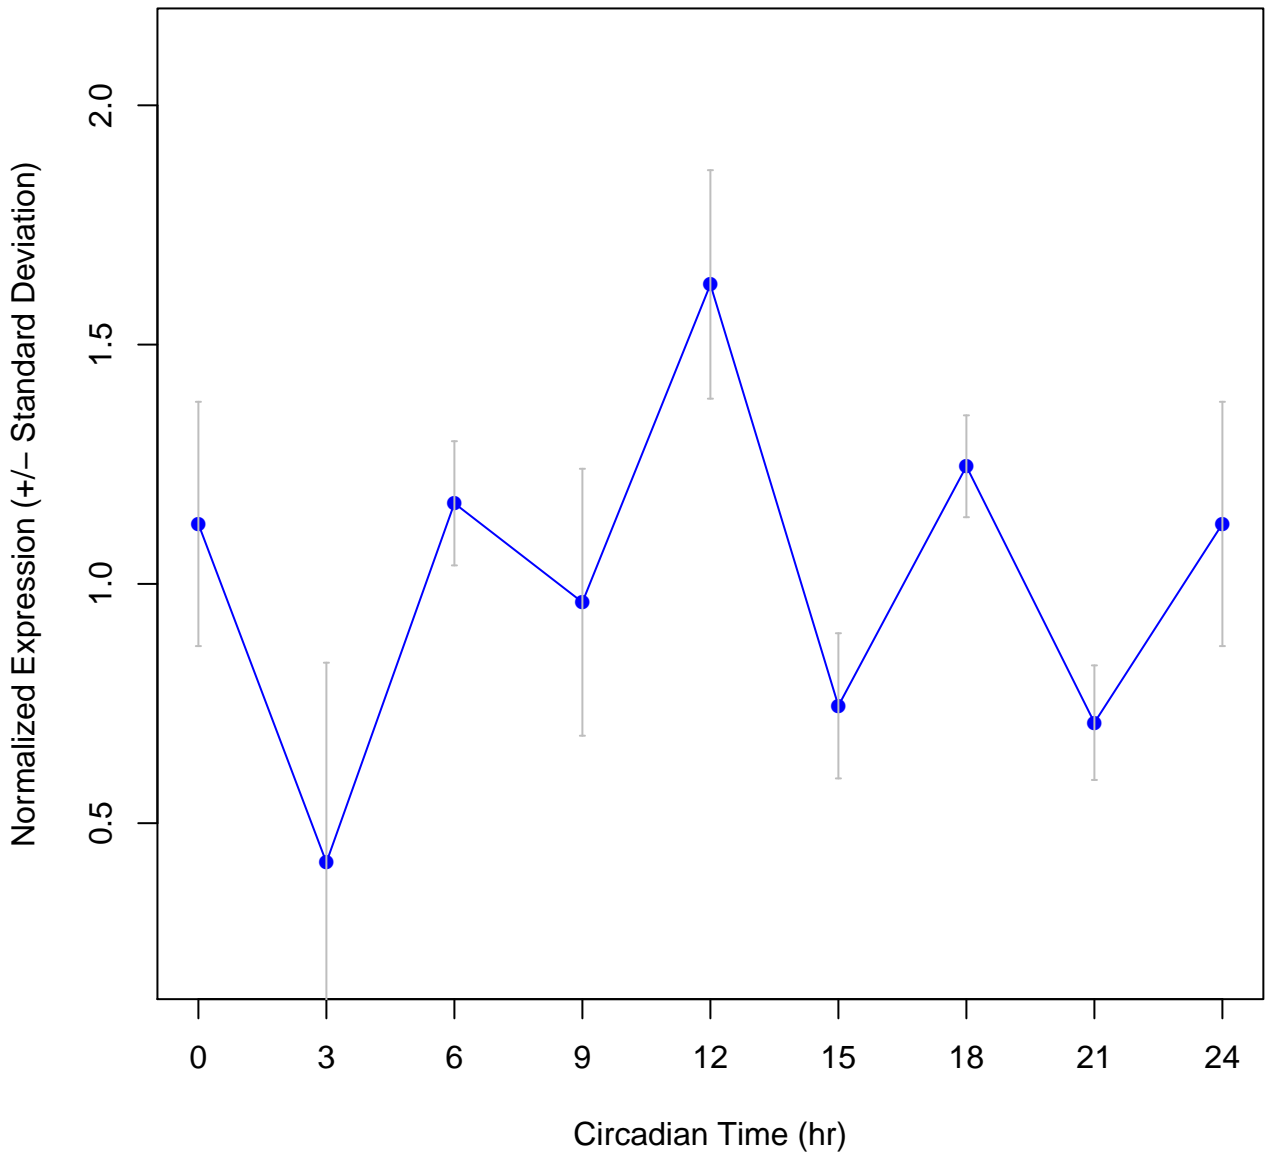



Supplement Figure 3 e2r

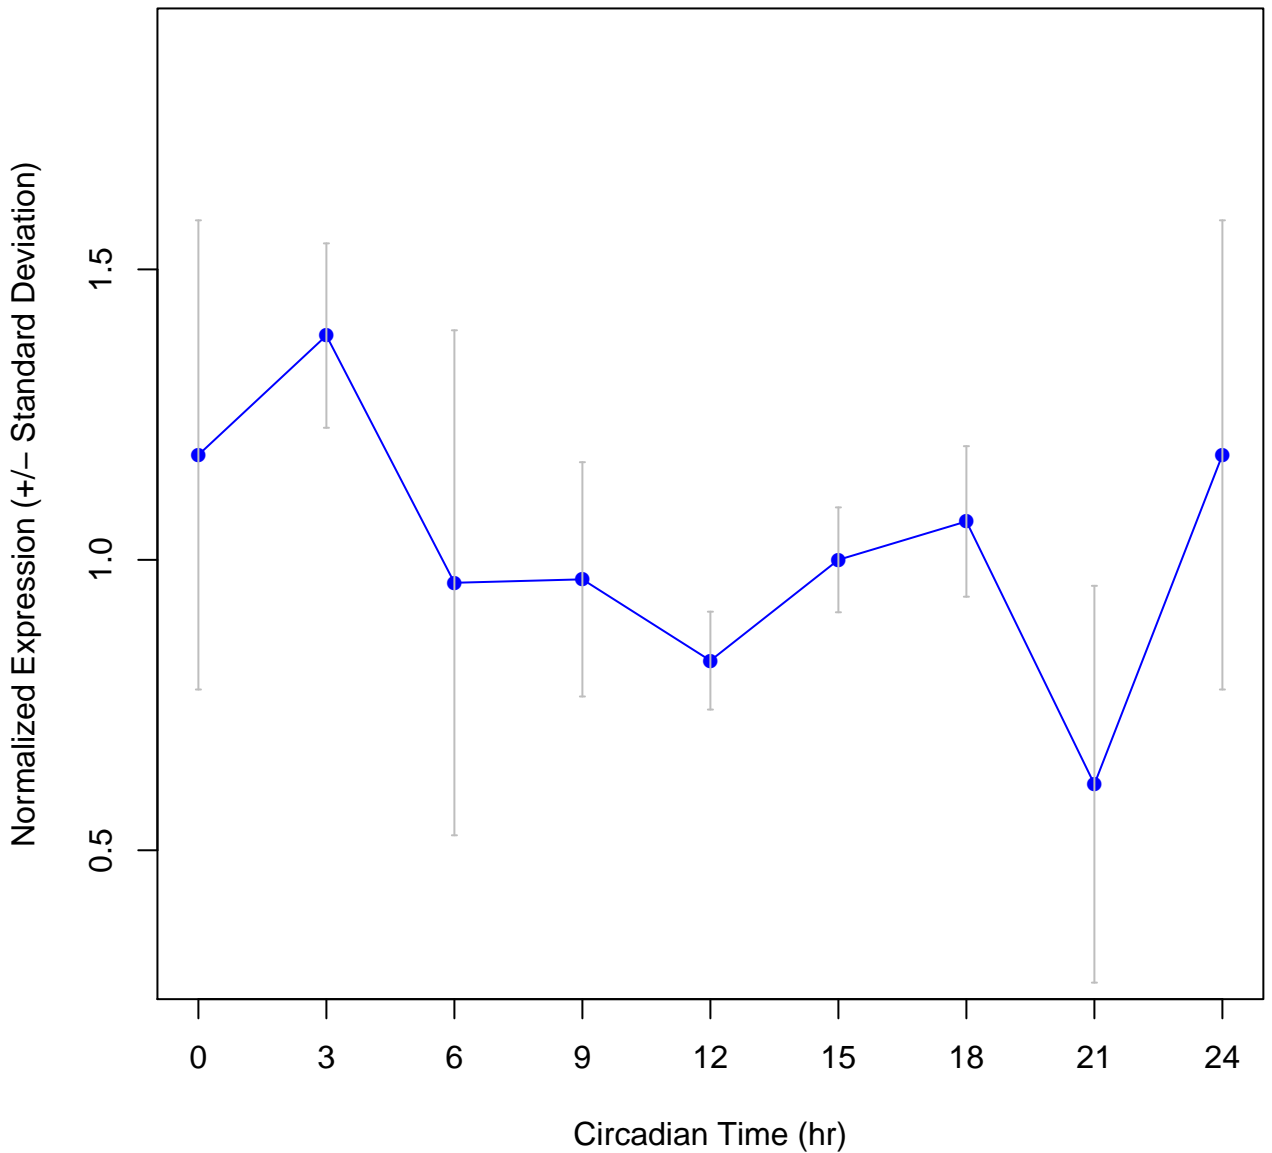

**Supplement Figure 3 fam102b**

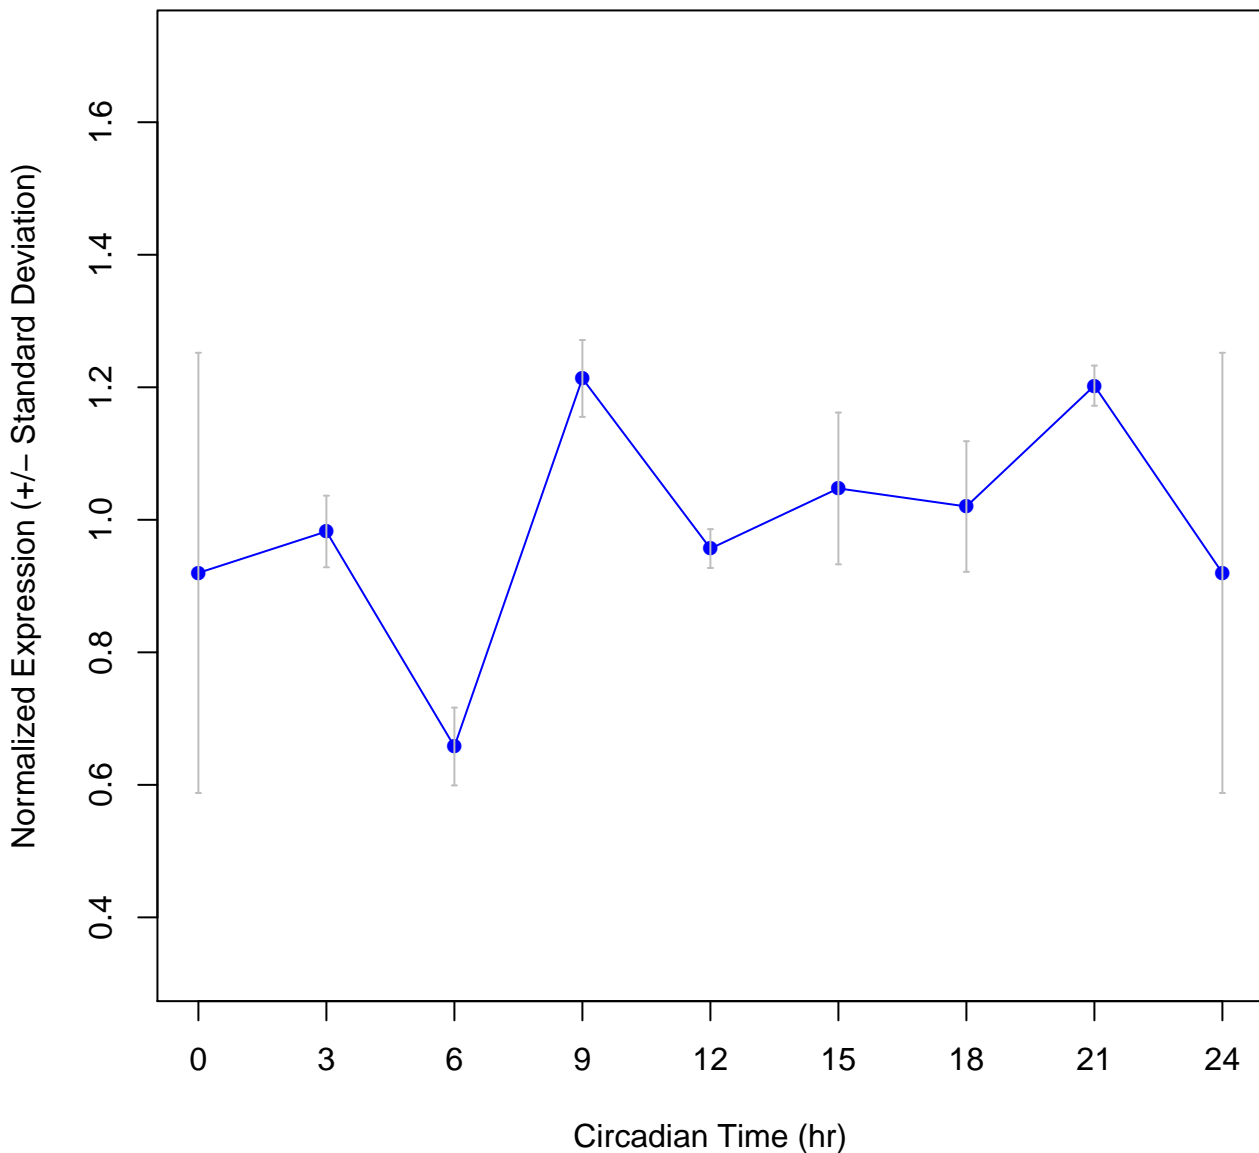

Supplement Figure 3 fasn

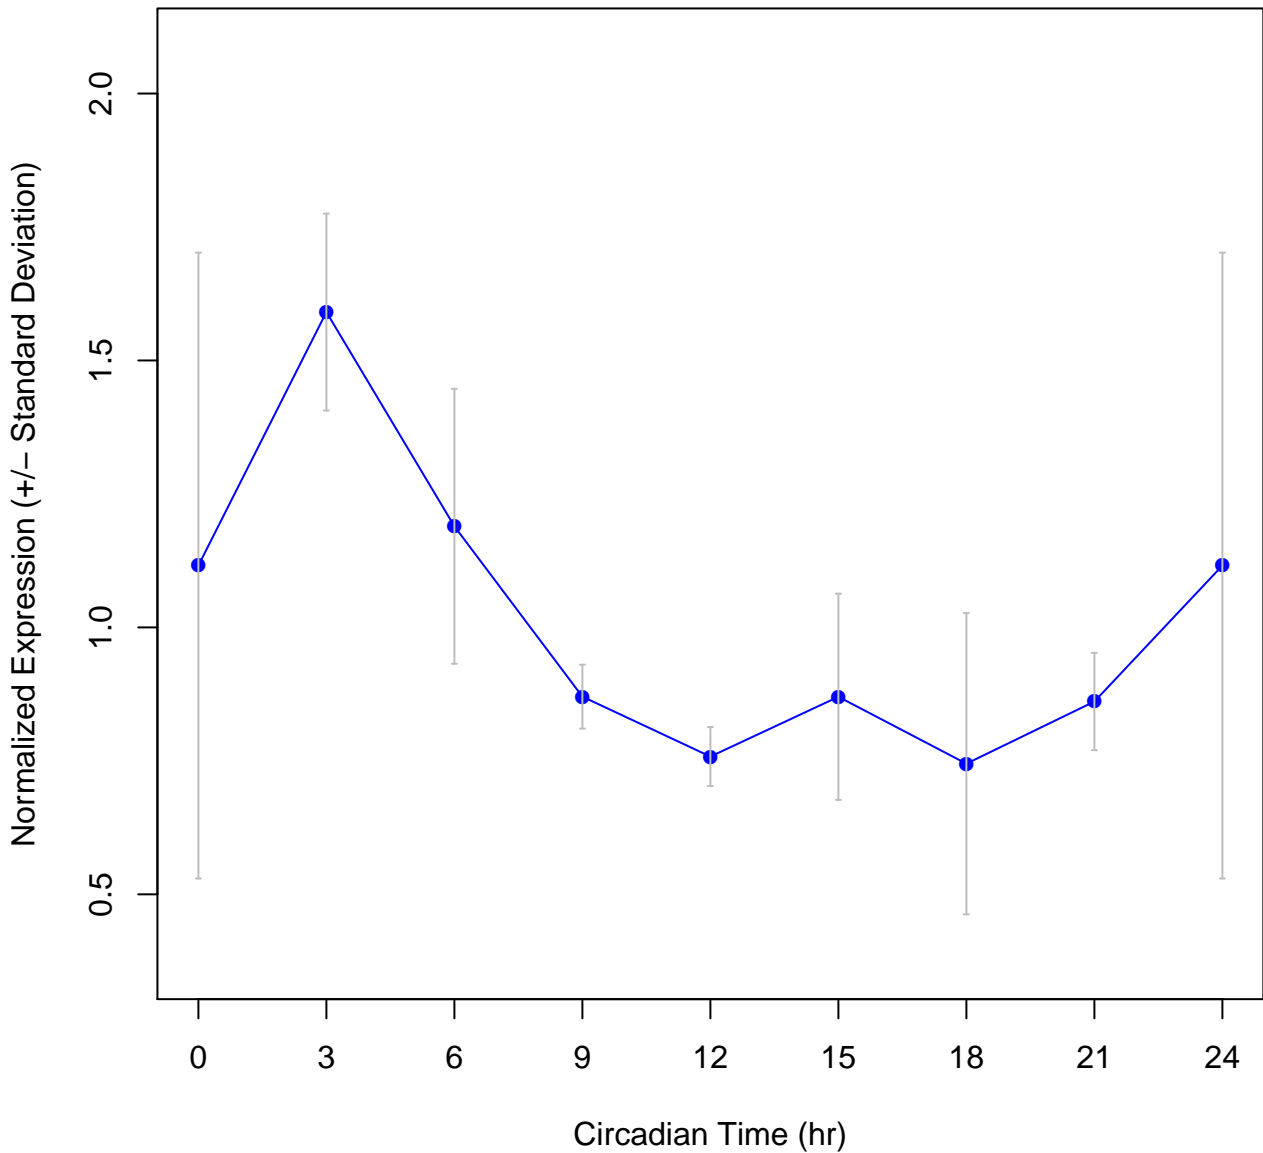

Supplement Figure 3 fbxw11

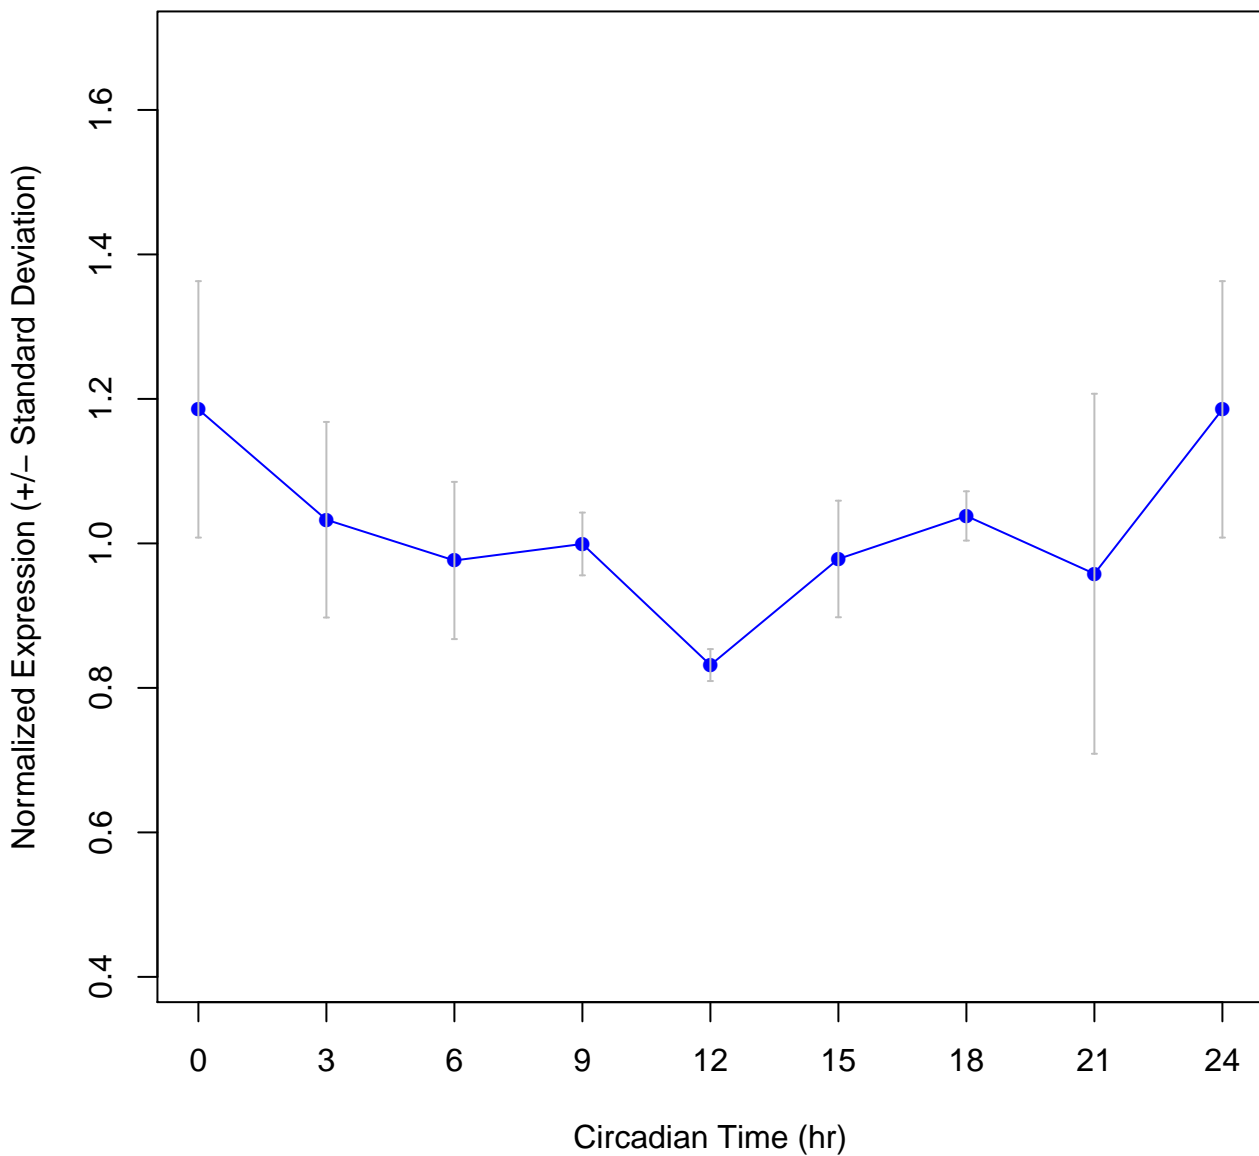

**Supplement Figure 3 fggy**

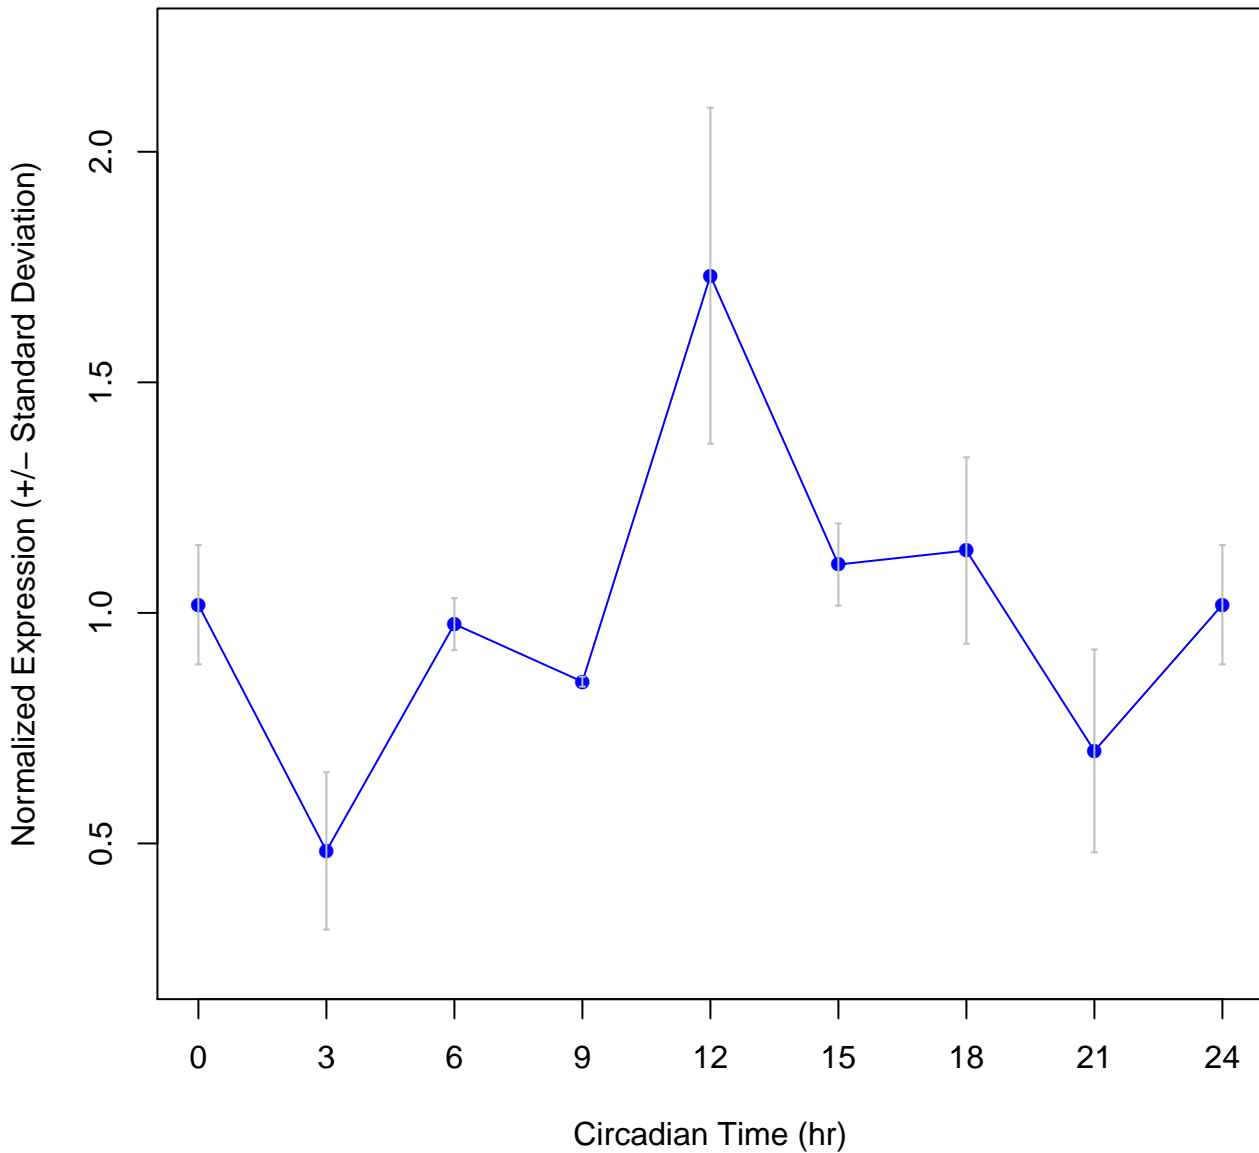

Supplement Figure 3 flt4

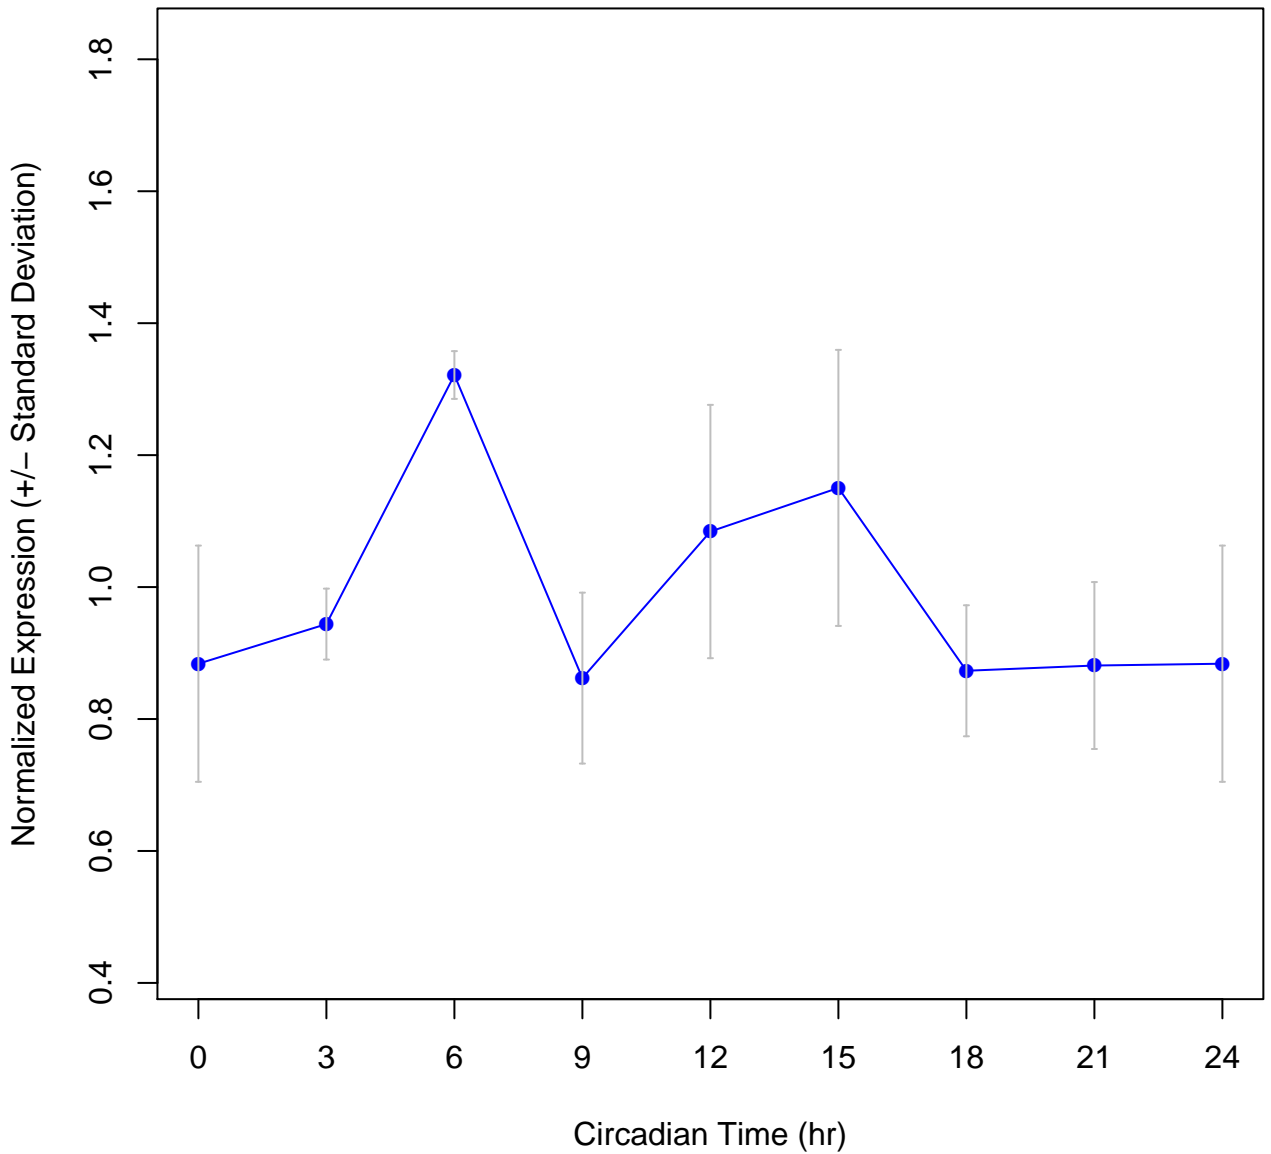

**Supplement Figure 3 foxn1**

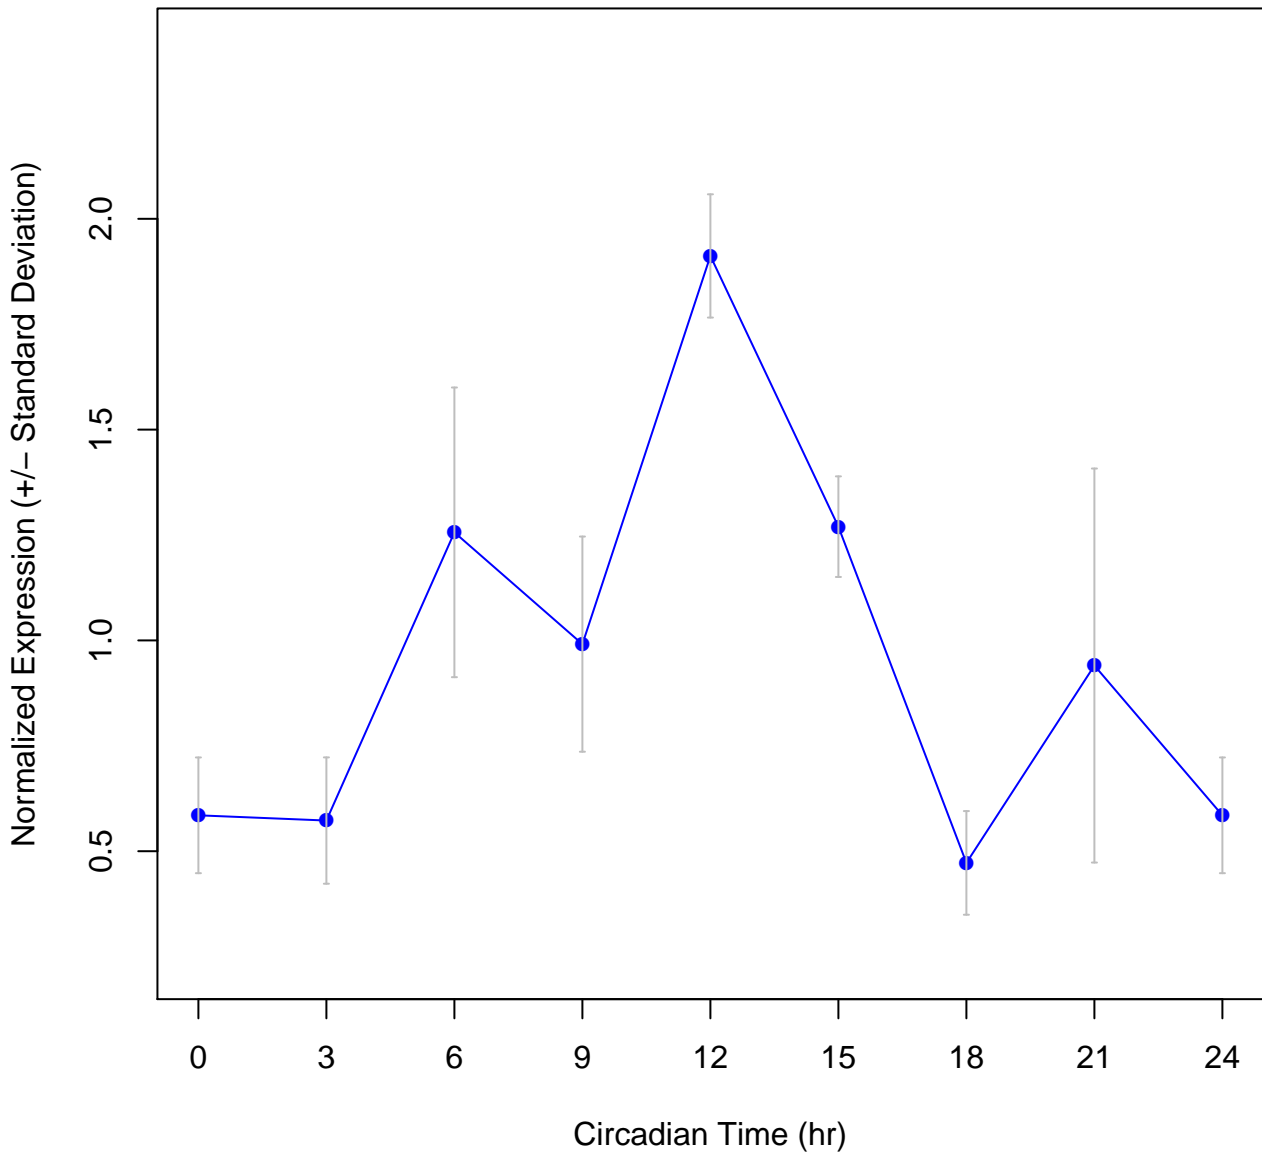

**Supplement Figure 3 foxo4**

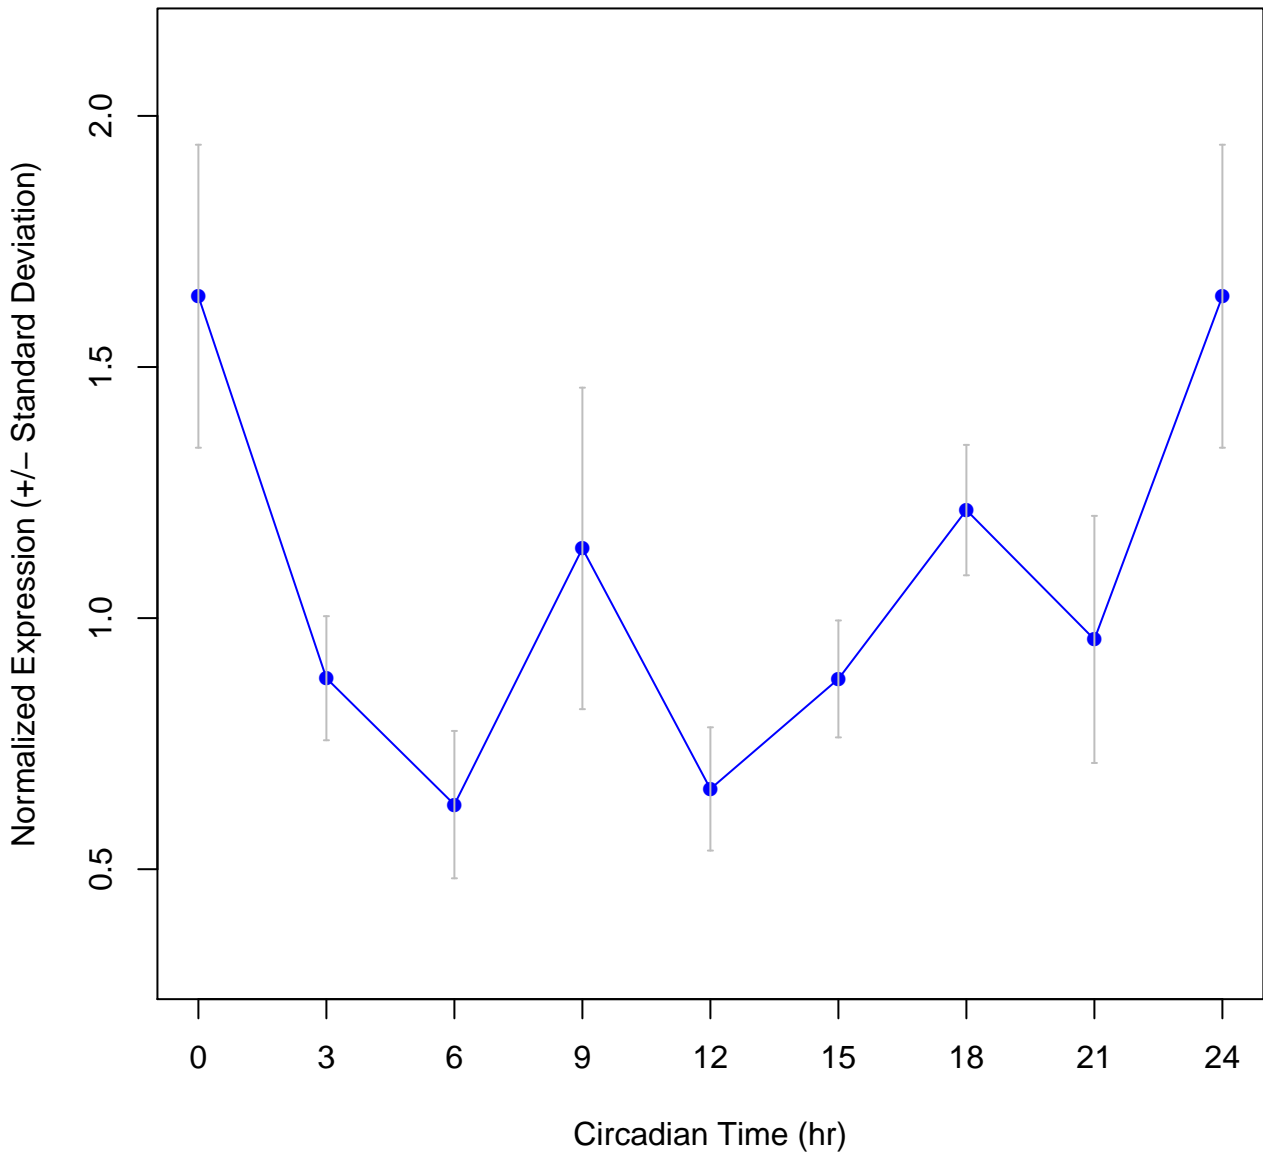



**Supplement Figure 3 g2e3**

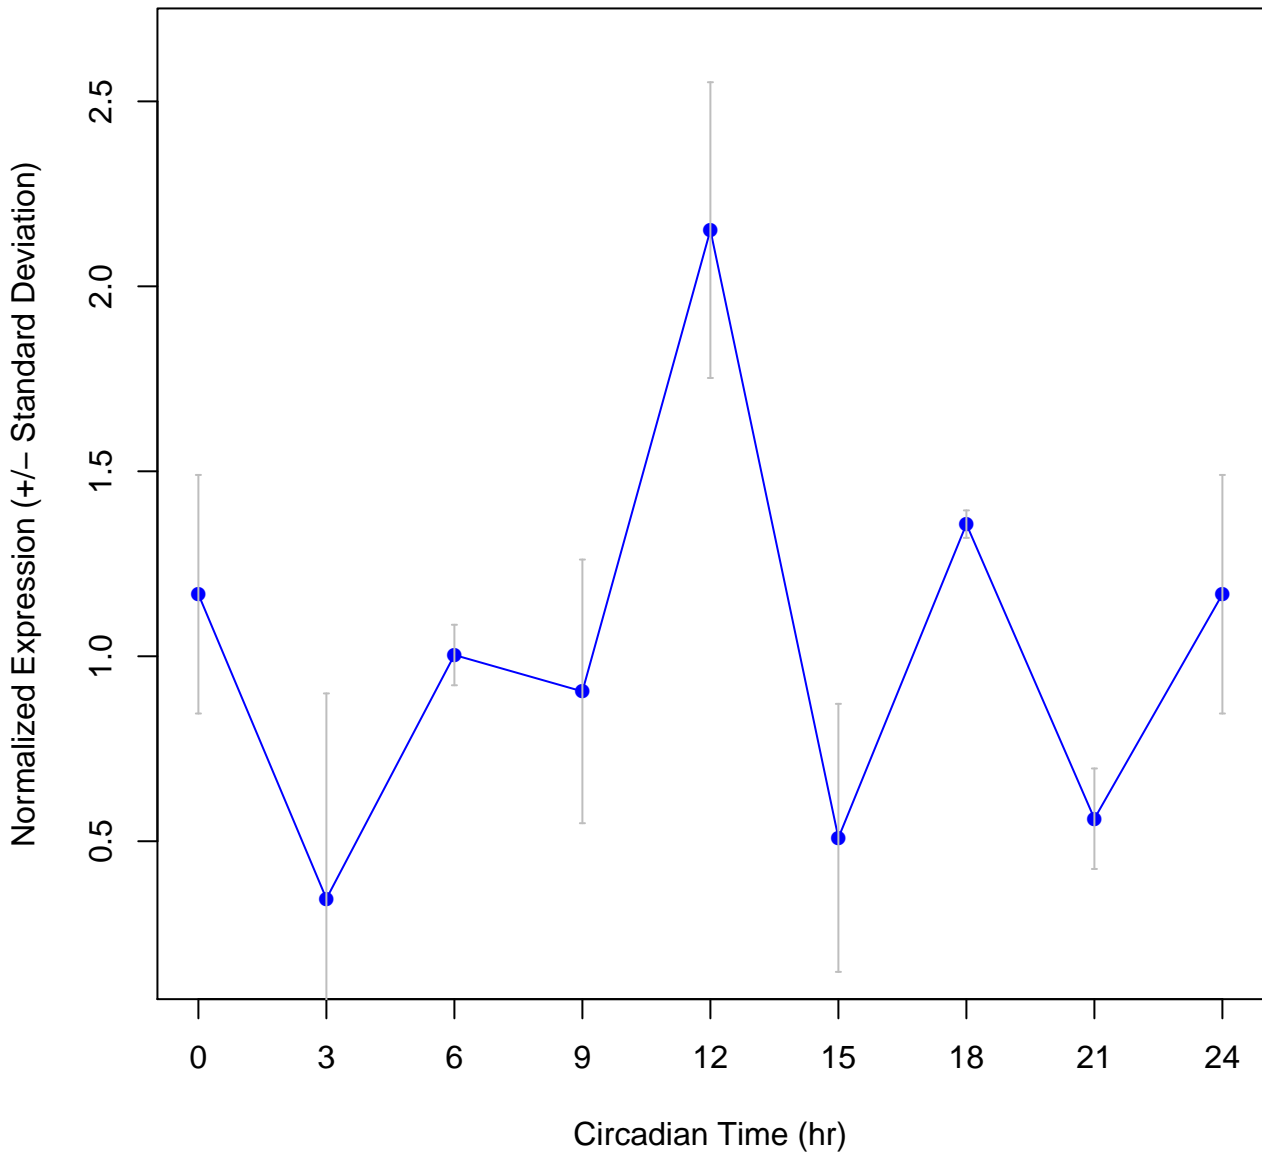

**Supplement Figure 3 gadd45aa**

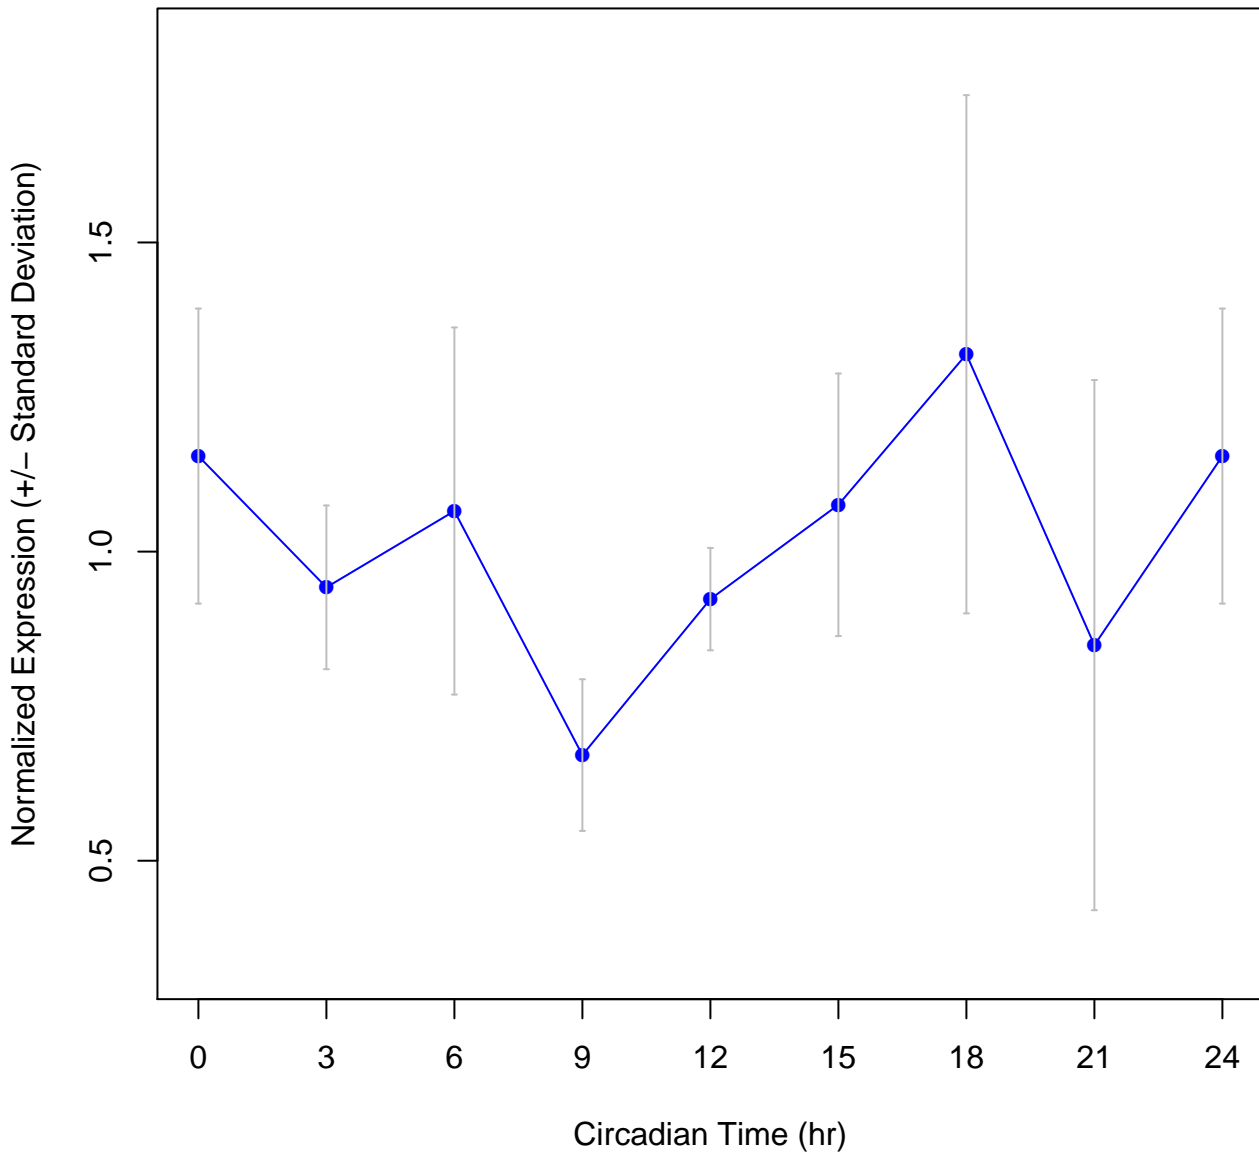

**Supplement Figure 3 gadd45ab**

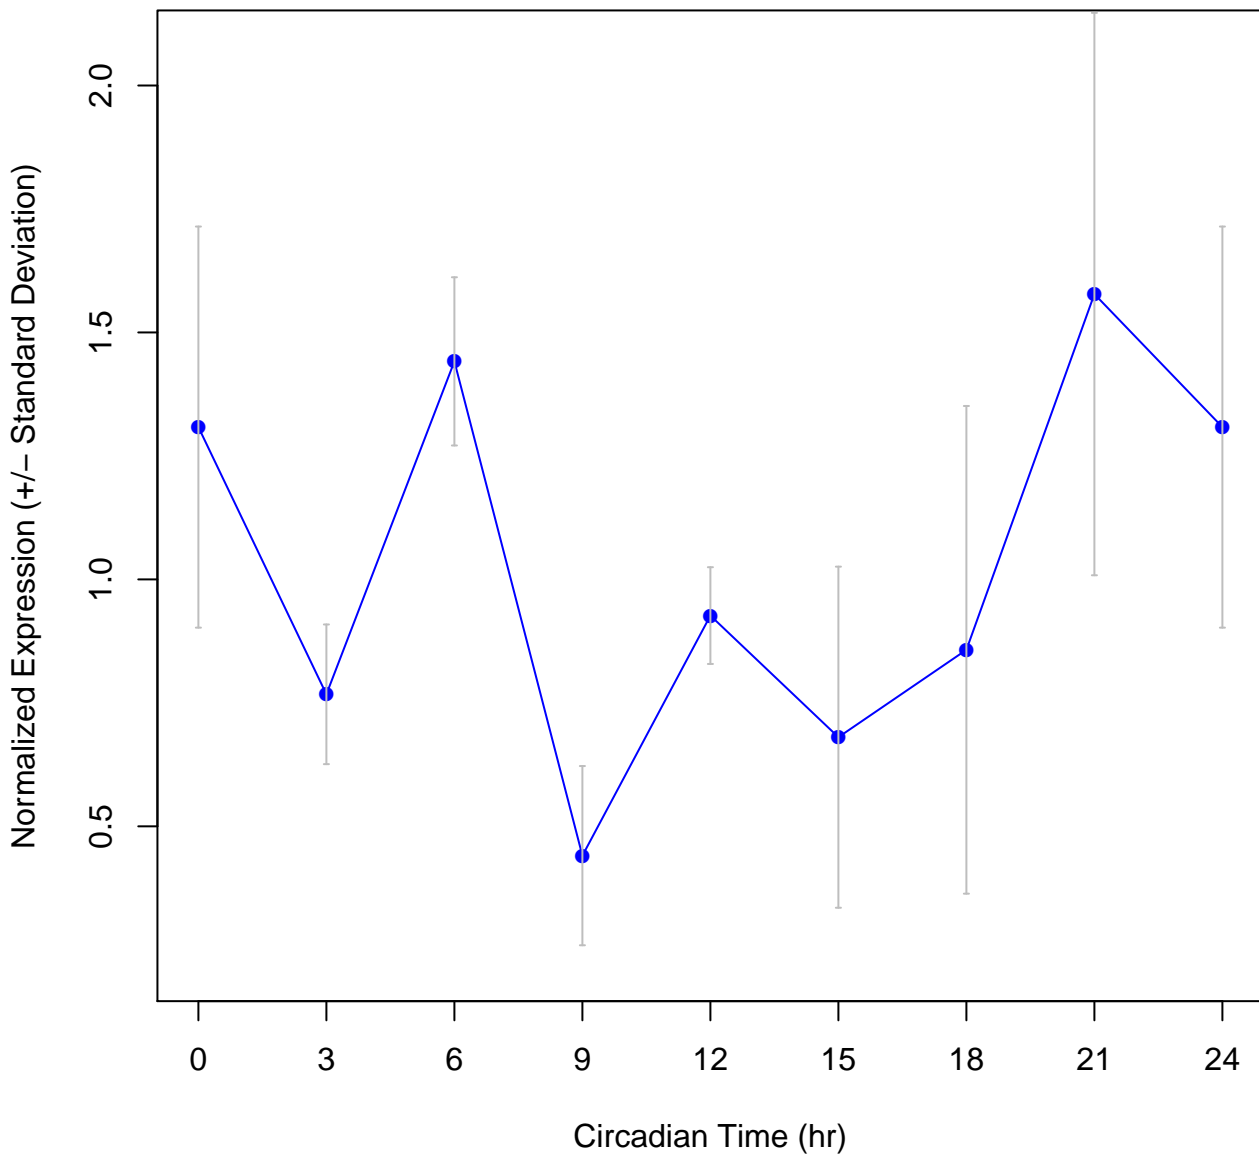

### Supplement Figure 3 gadd45b

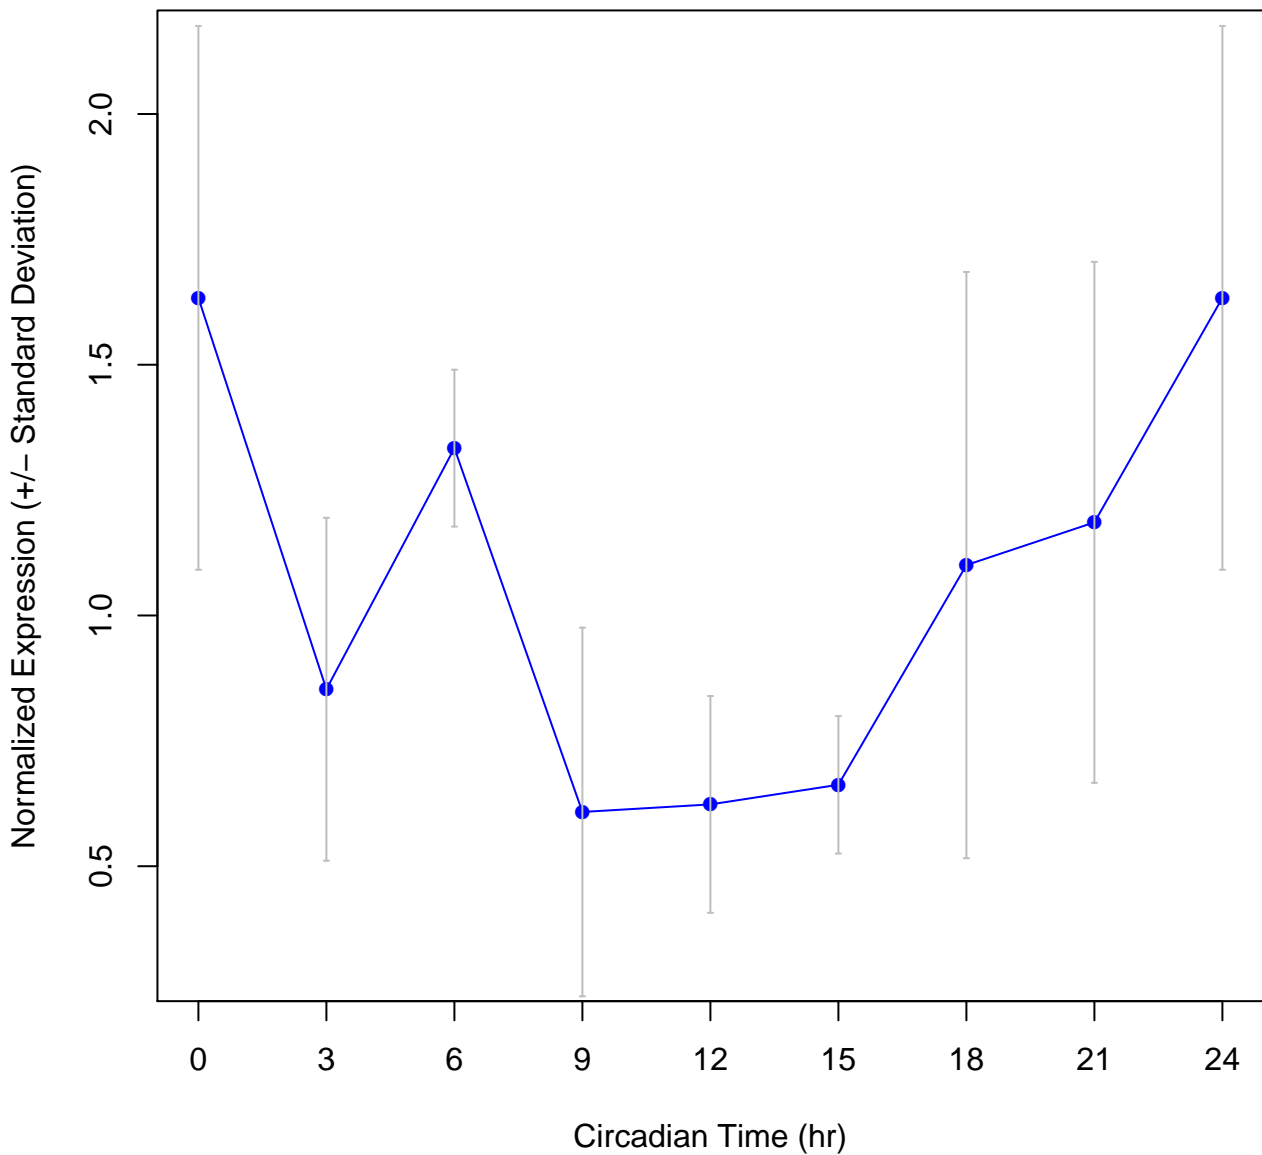

Supplement Figure 3 gna15

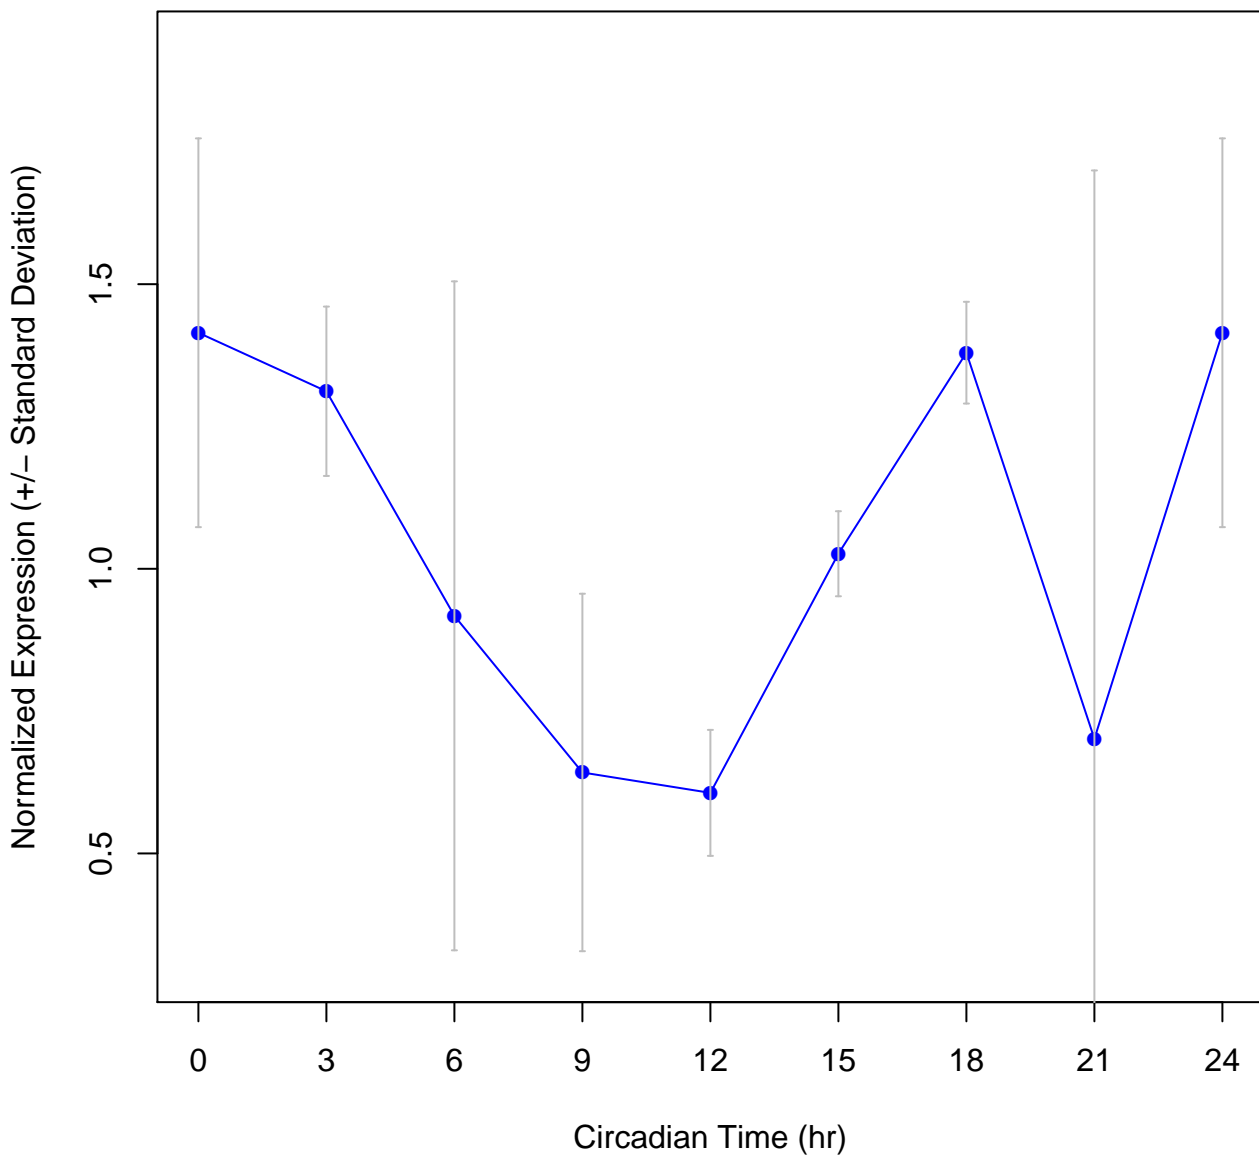

Supplement Figure 3 grin1

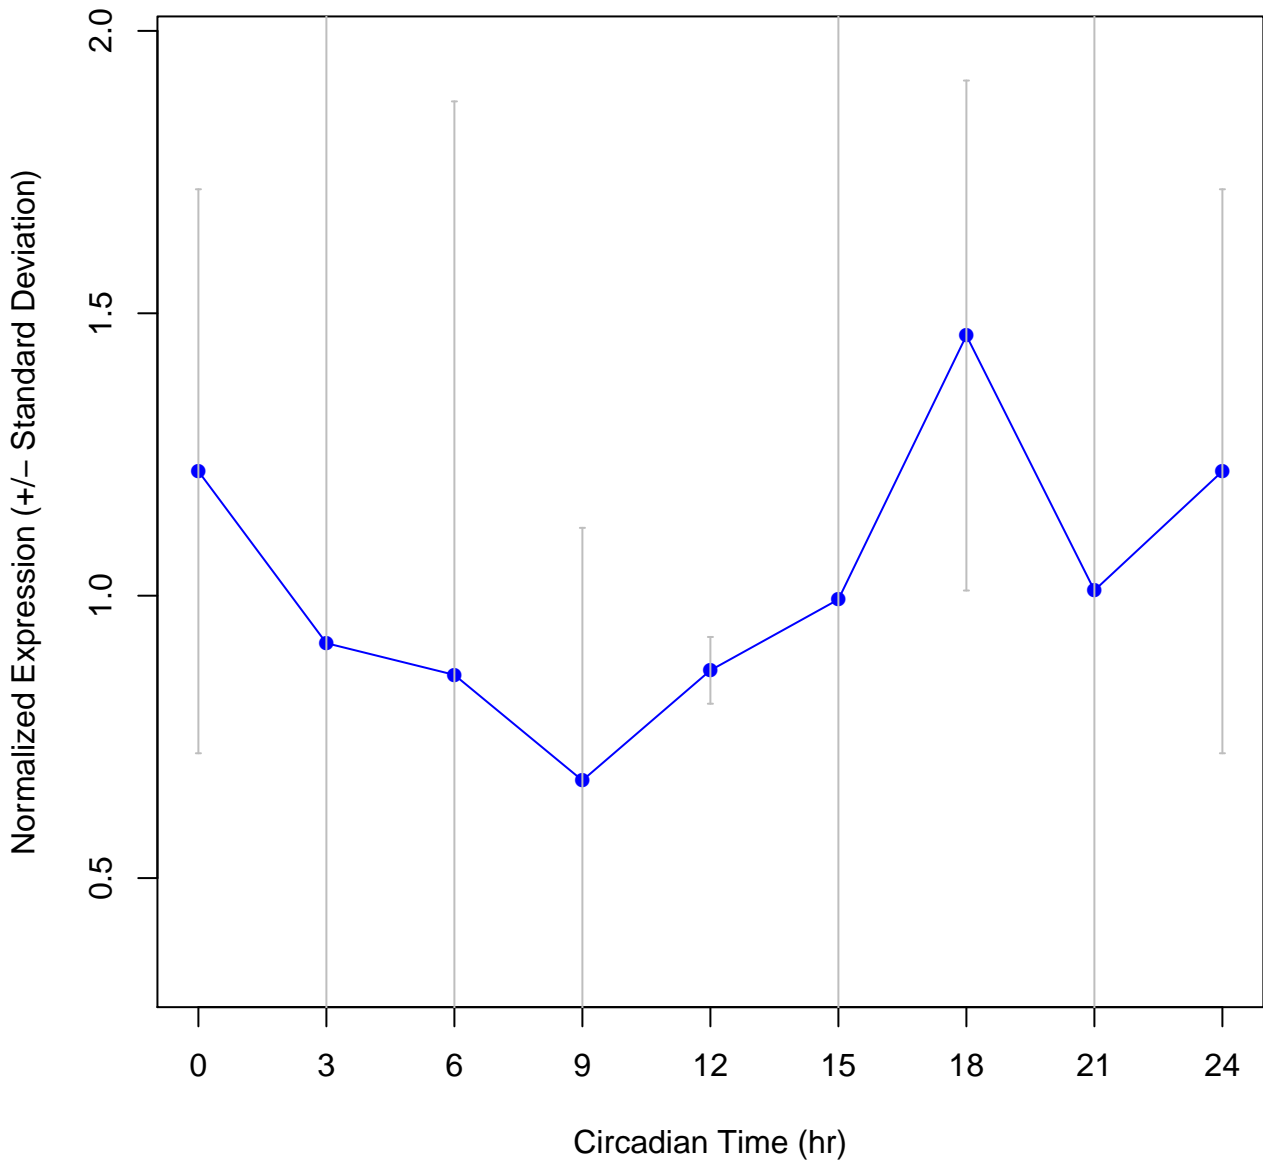

### Supplement Figure 3 grin2a

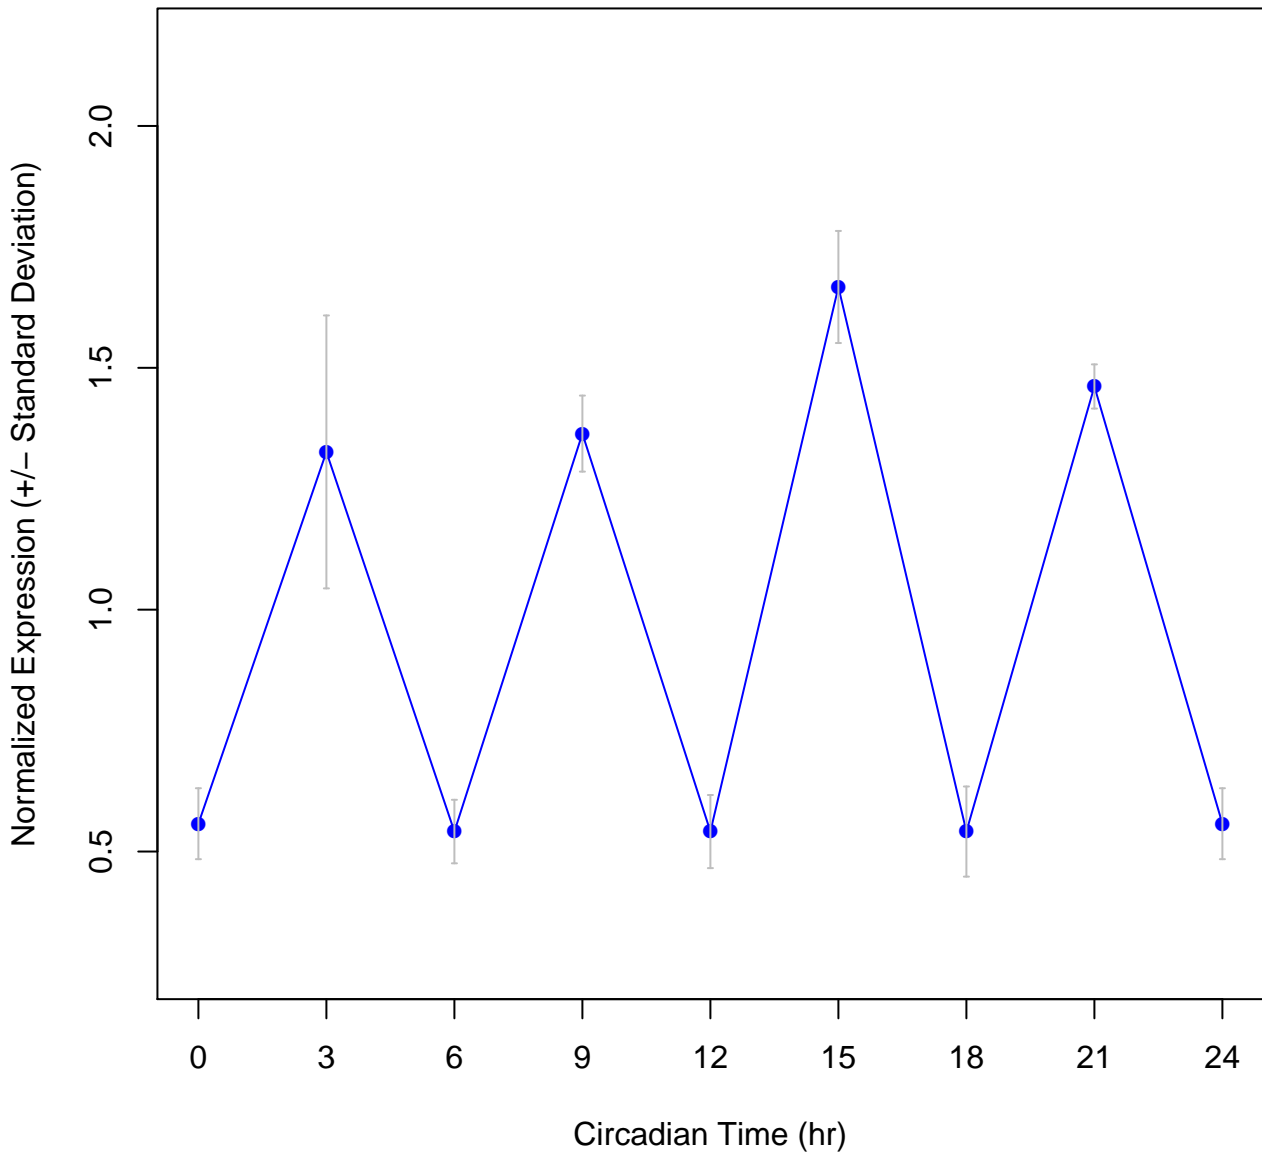

### Supplement Figure 3 hdac3

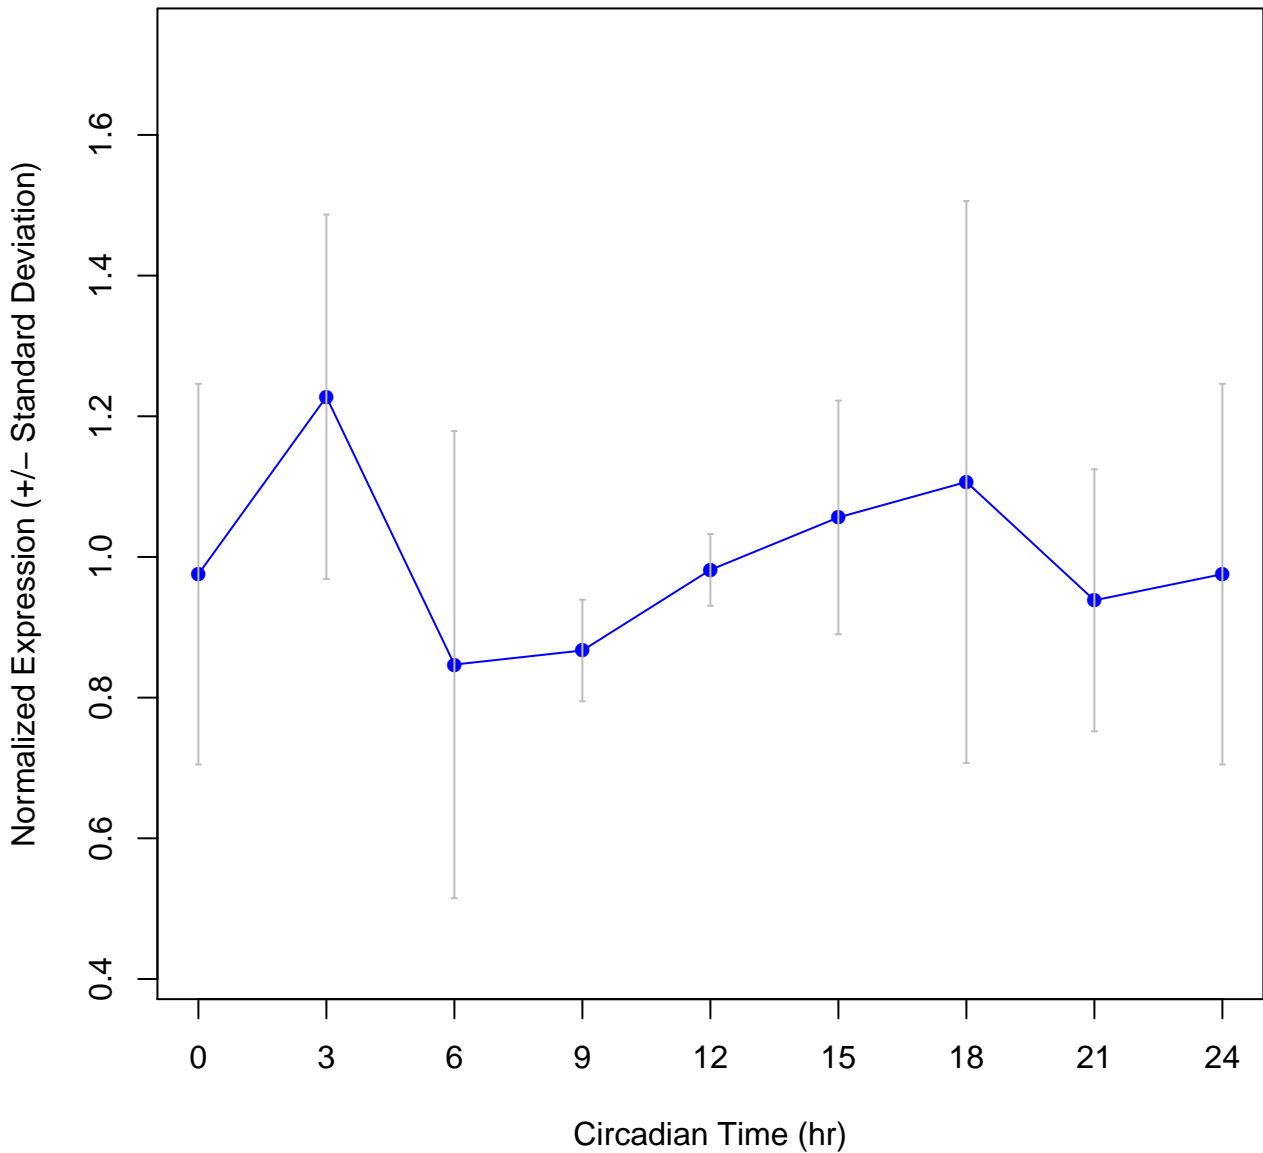



Supplement Figure 3 hmox1

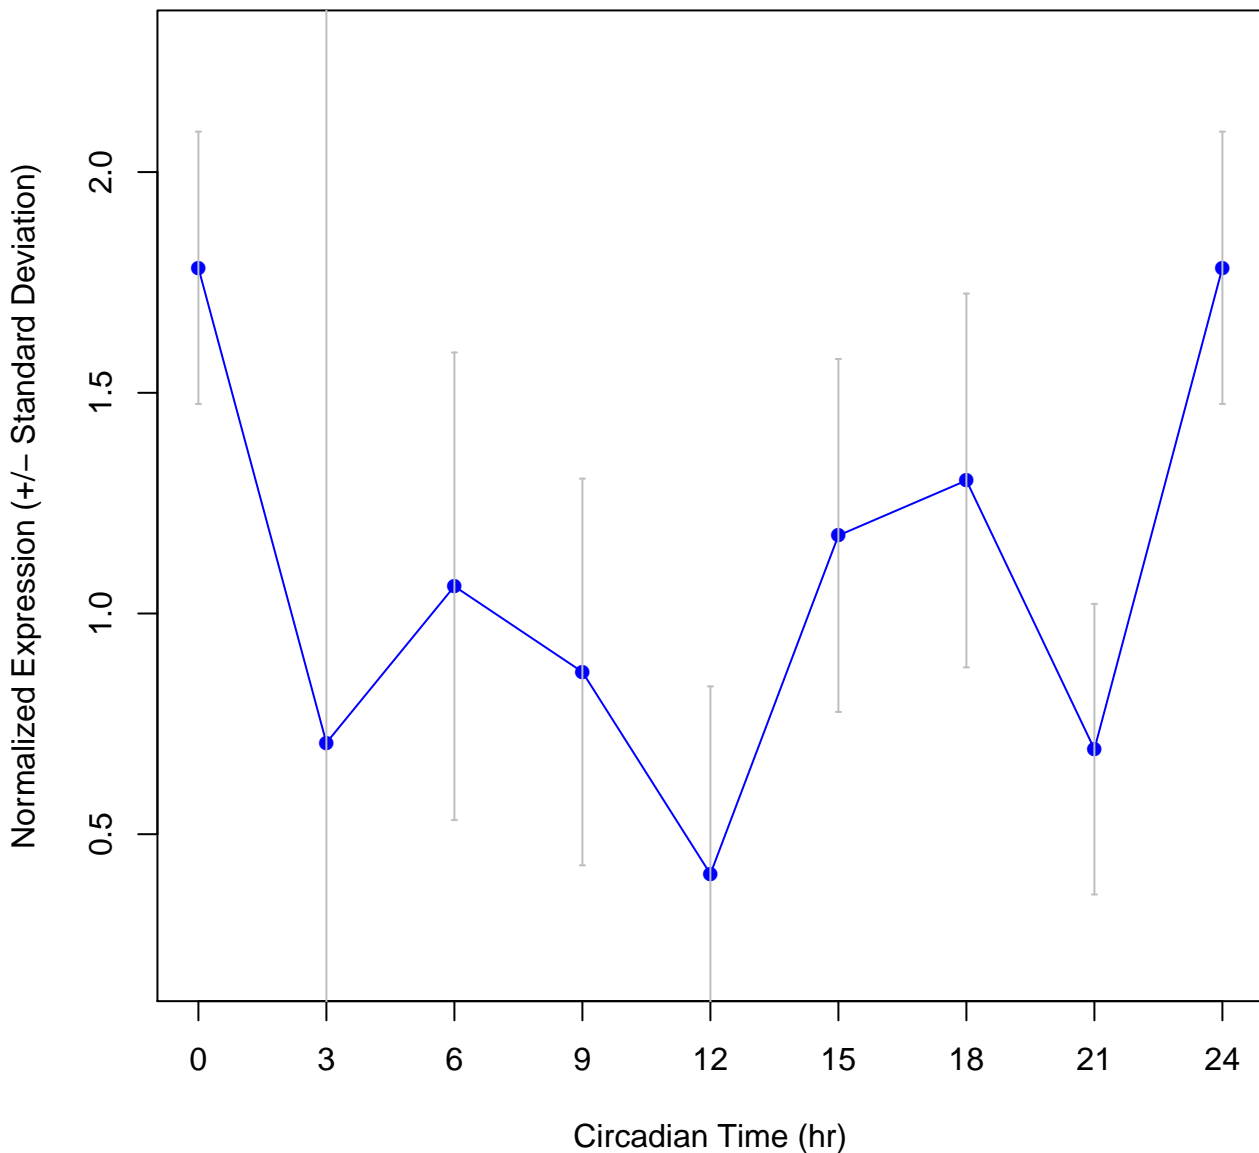

### Supplement Figure 3 hp

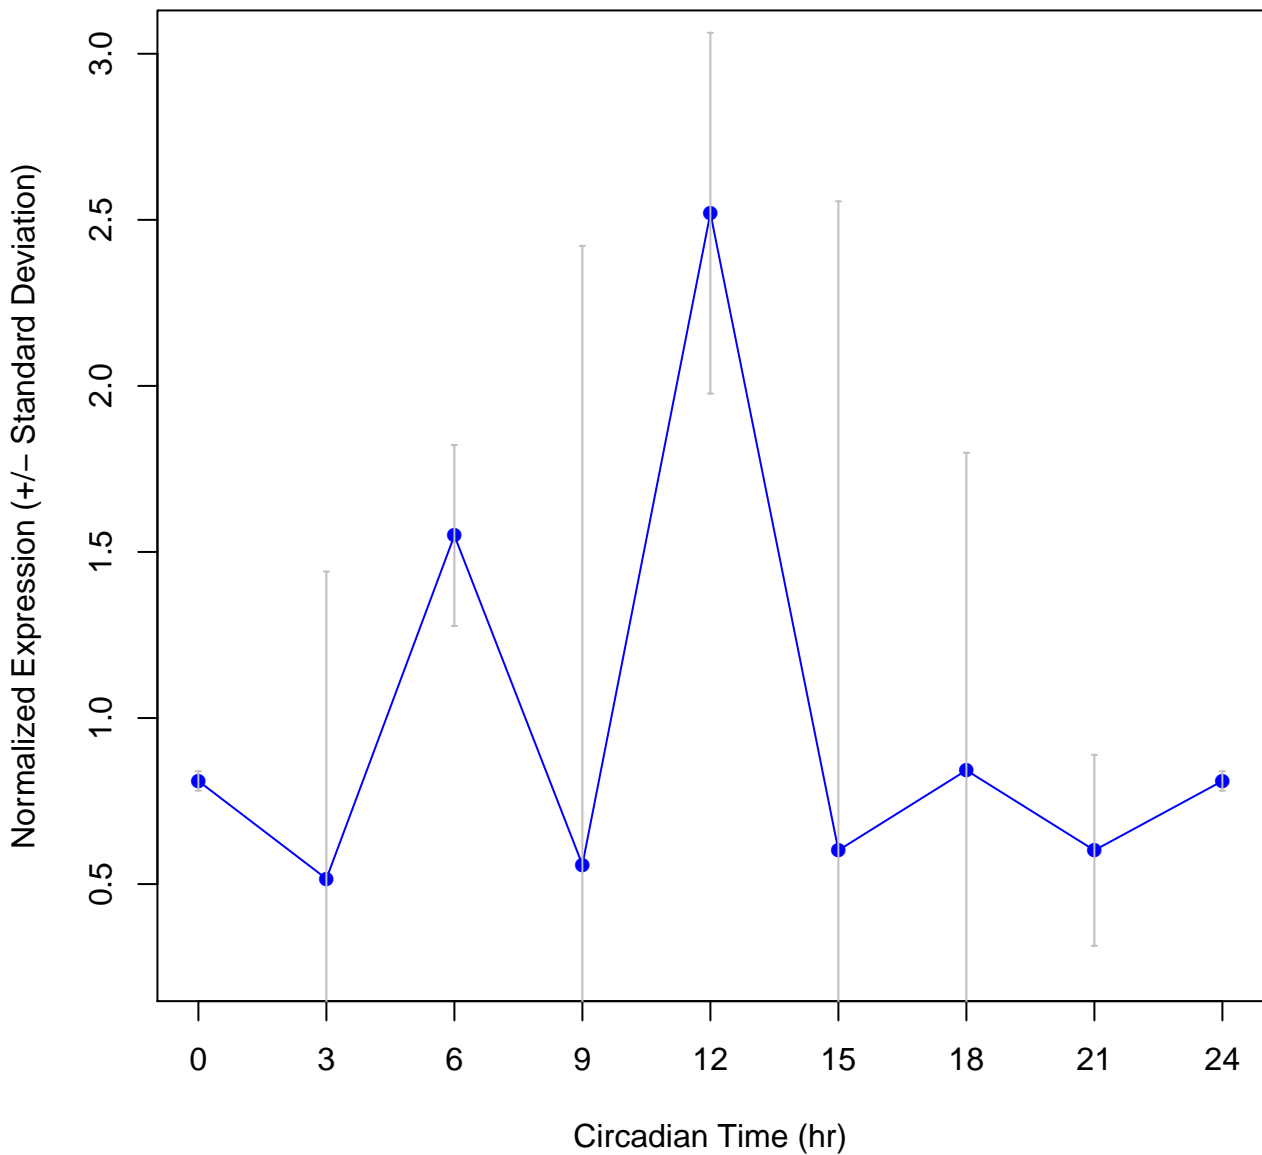

**Supplement Figure 3 hsp90aa1**

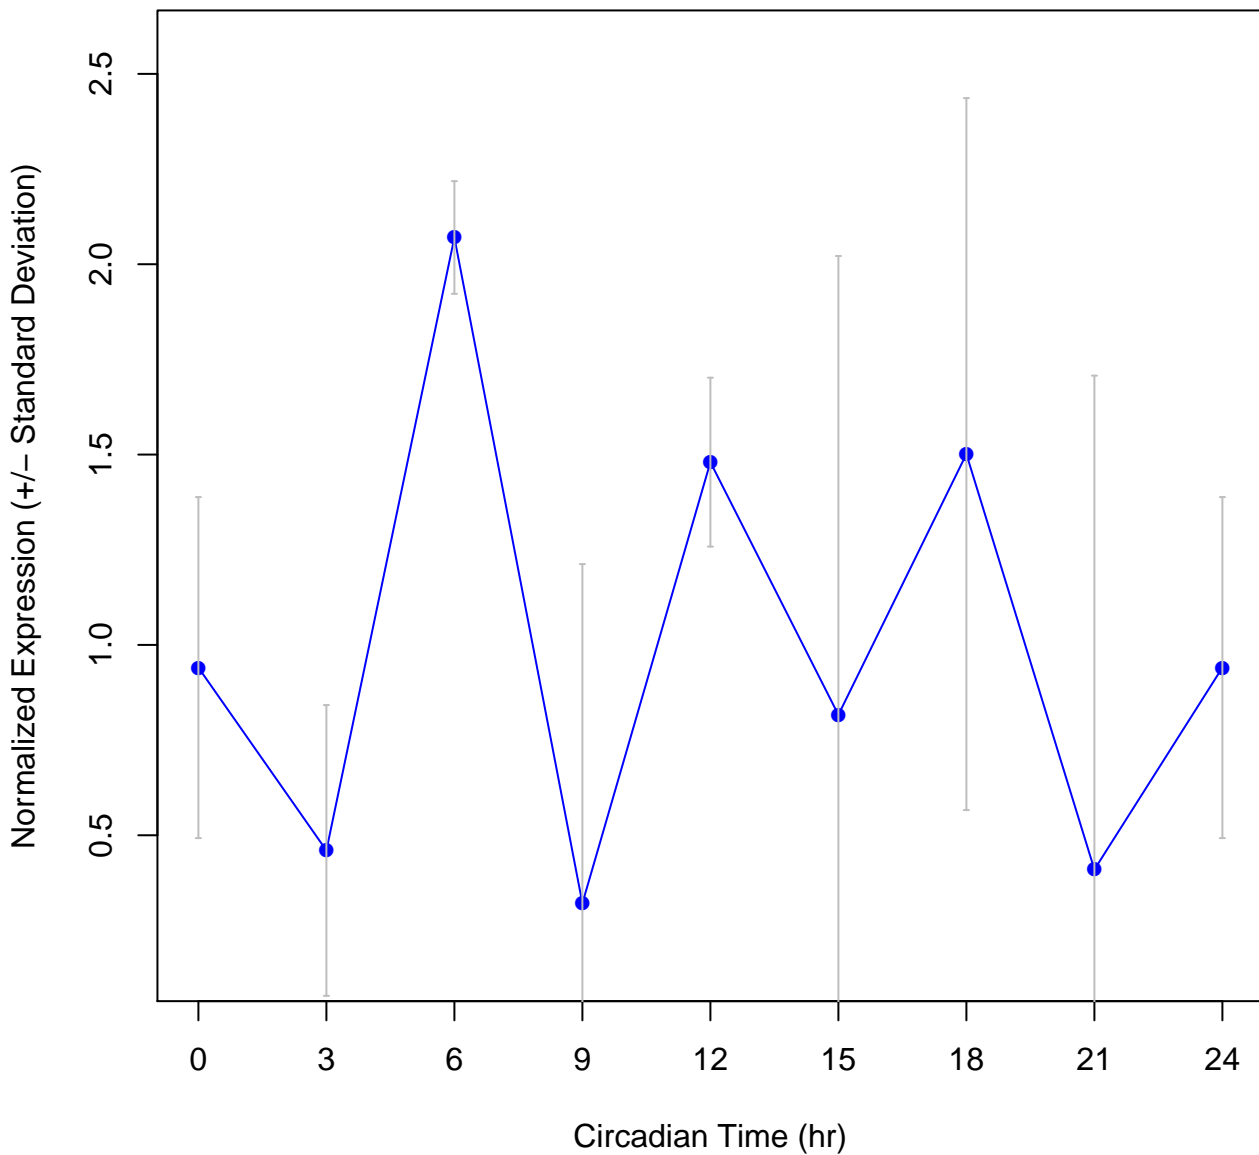

**Supplement Figure 3 hspa4**

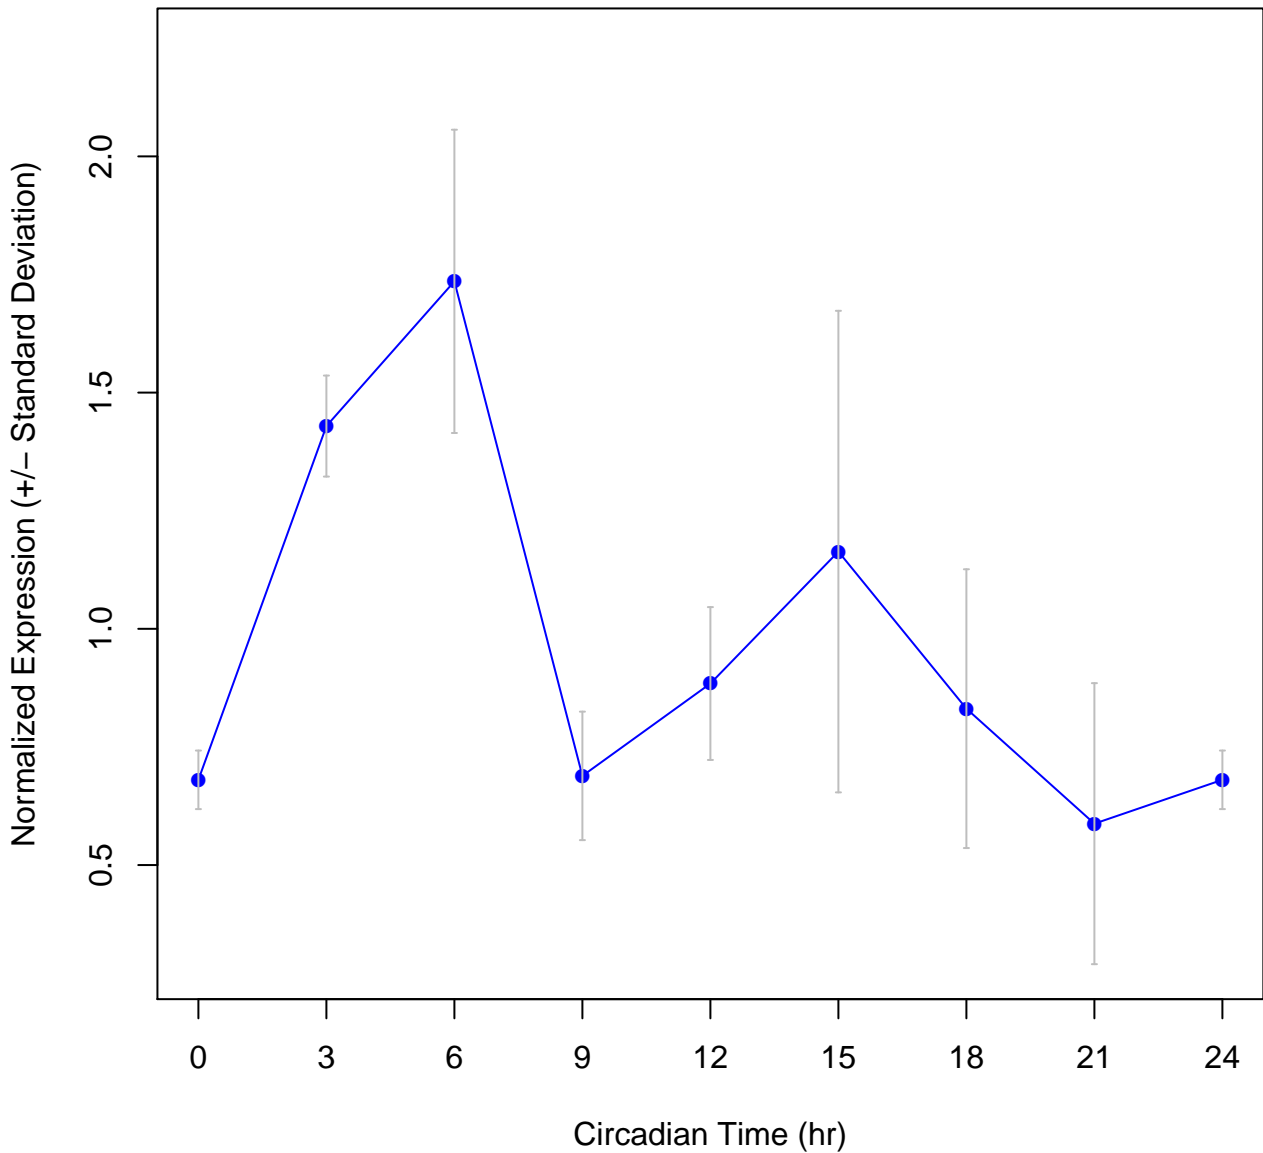

### Supplement Figure 3 hunk

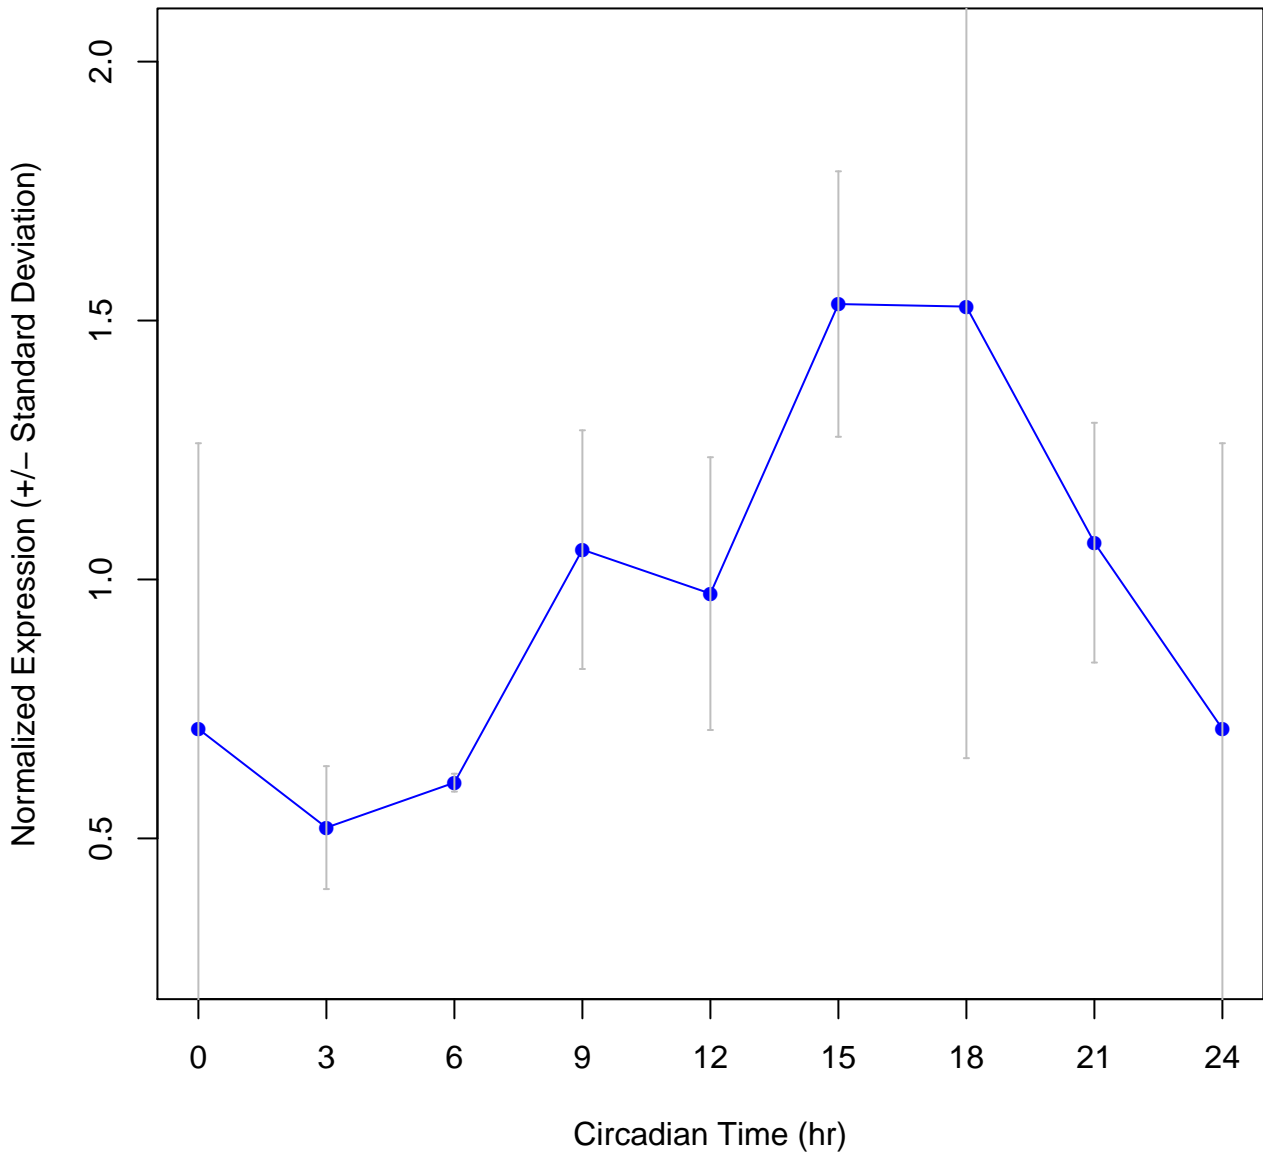

Supplement Figure 3 igf1

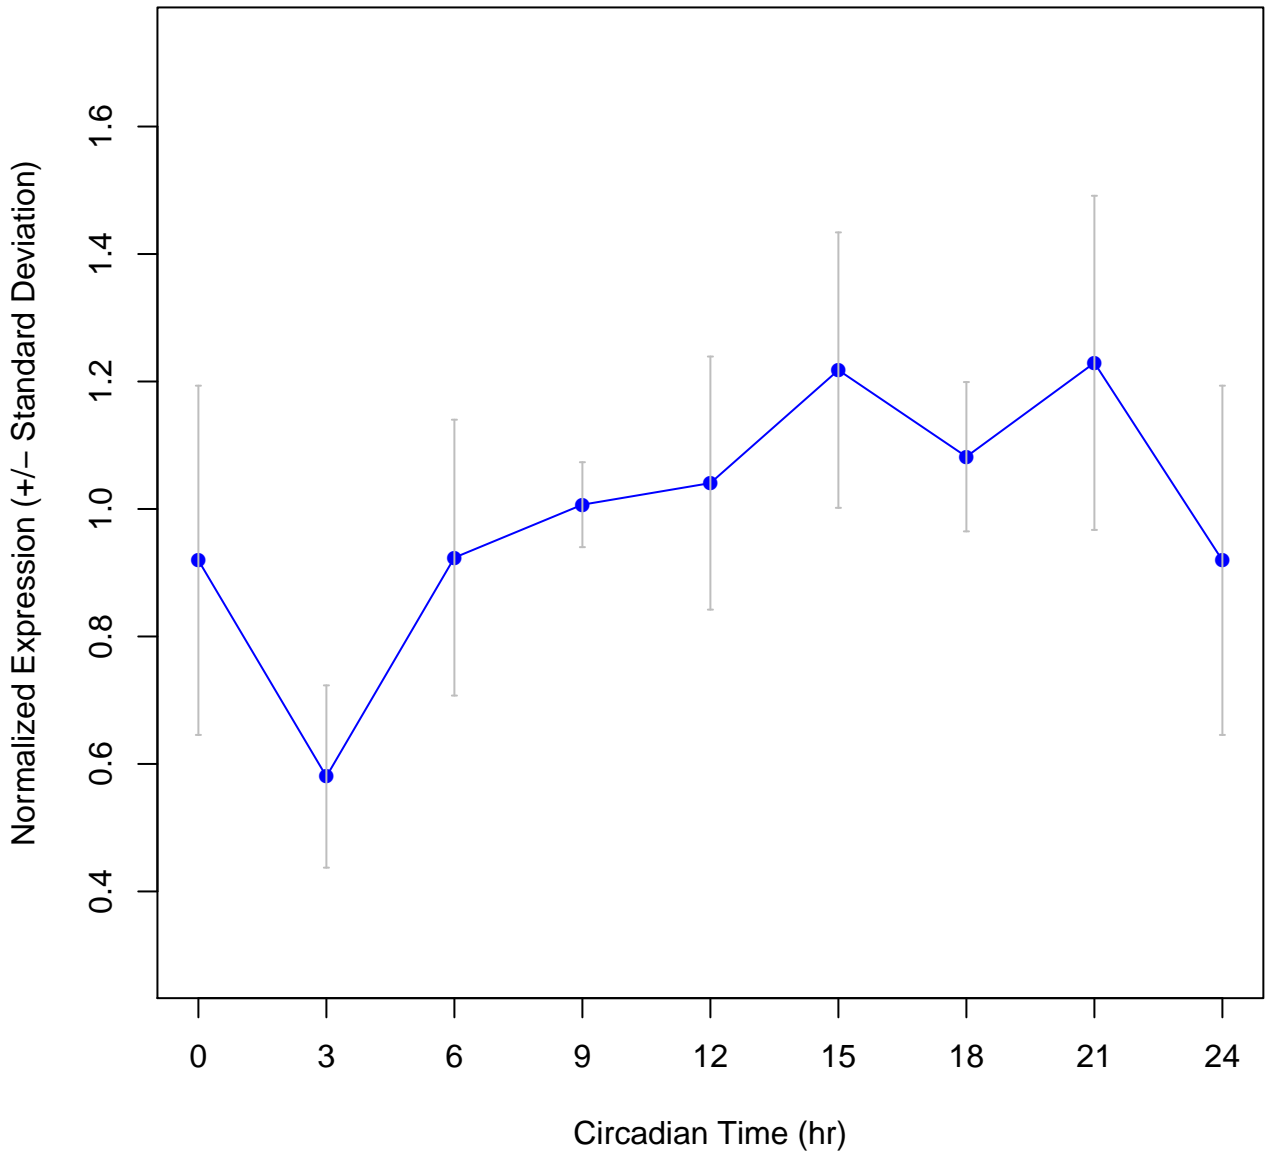

### Supplement Figure 3 ints9

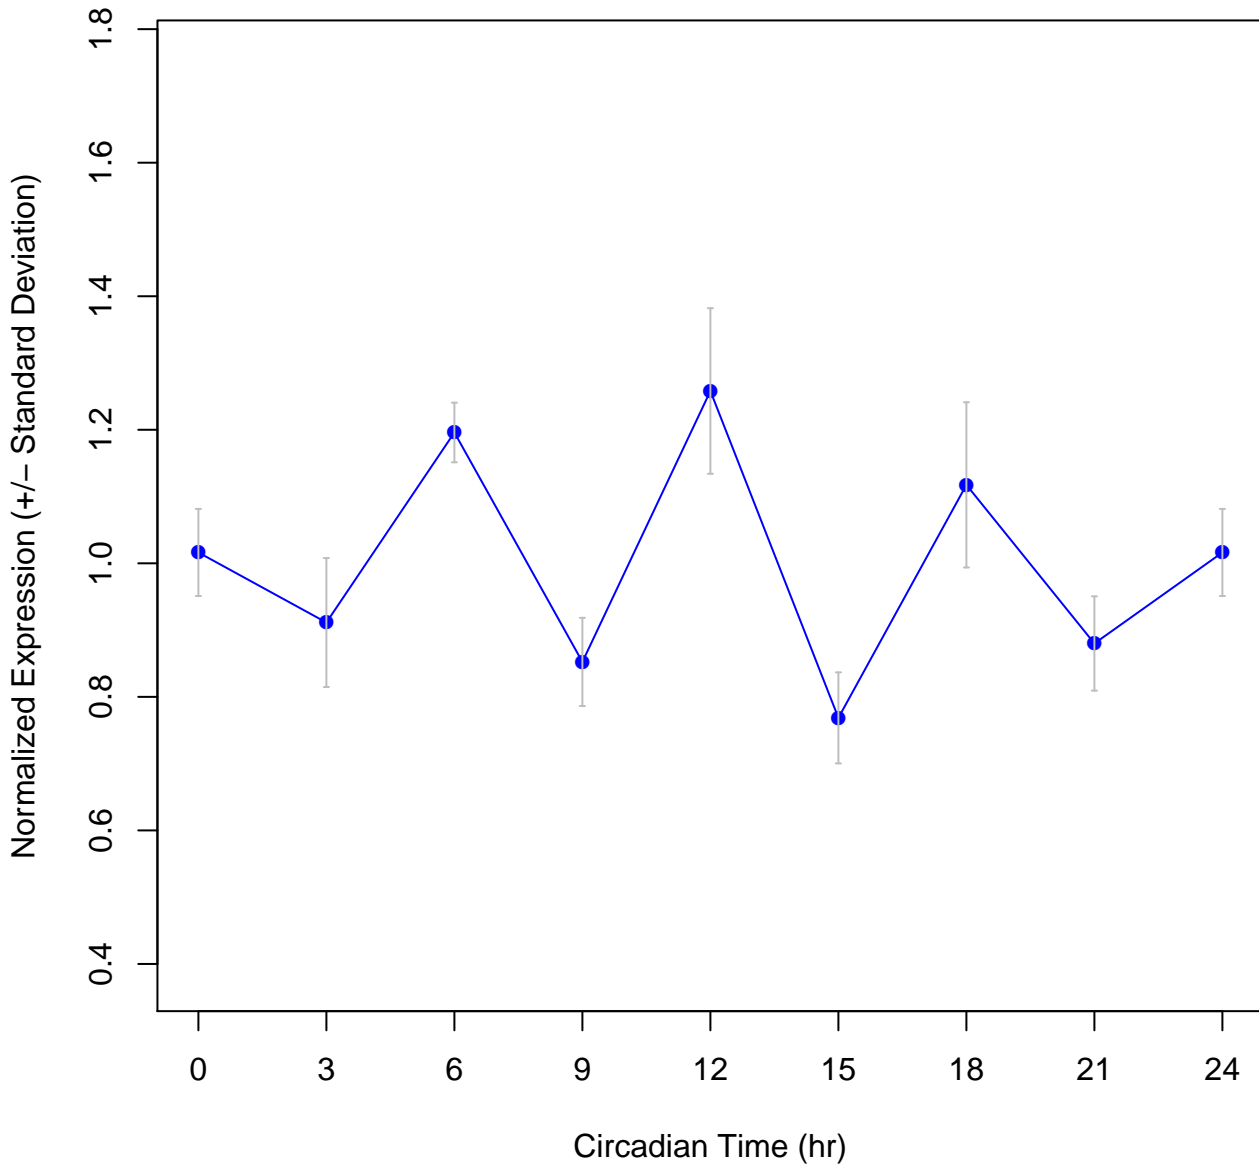

Supplement Figure 3 *irs1*

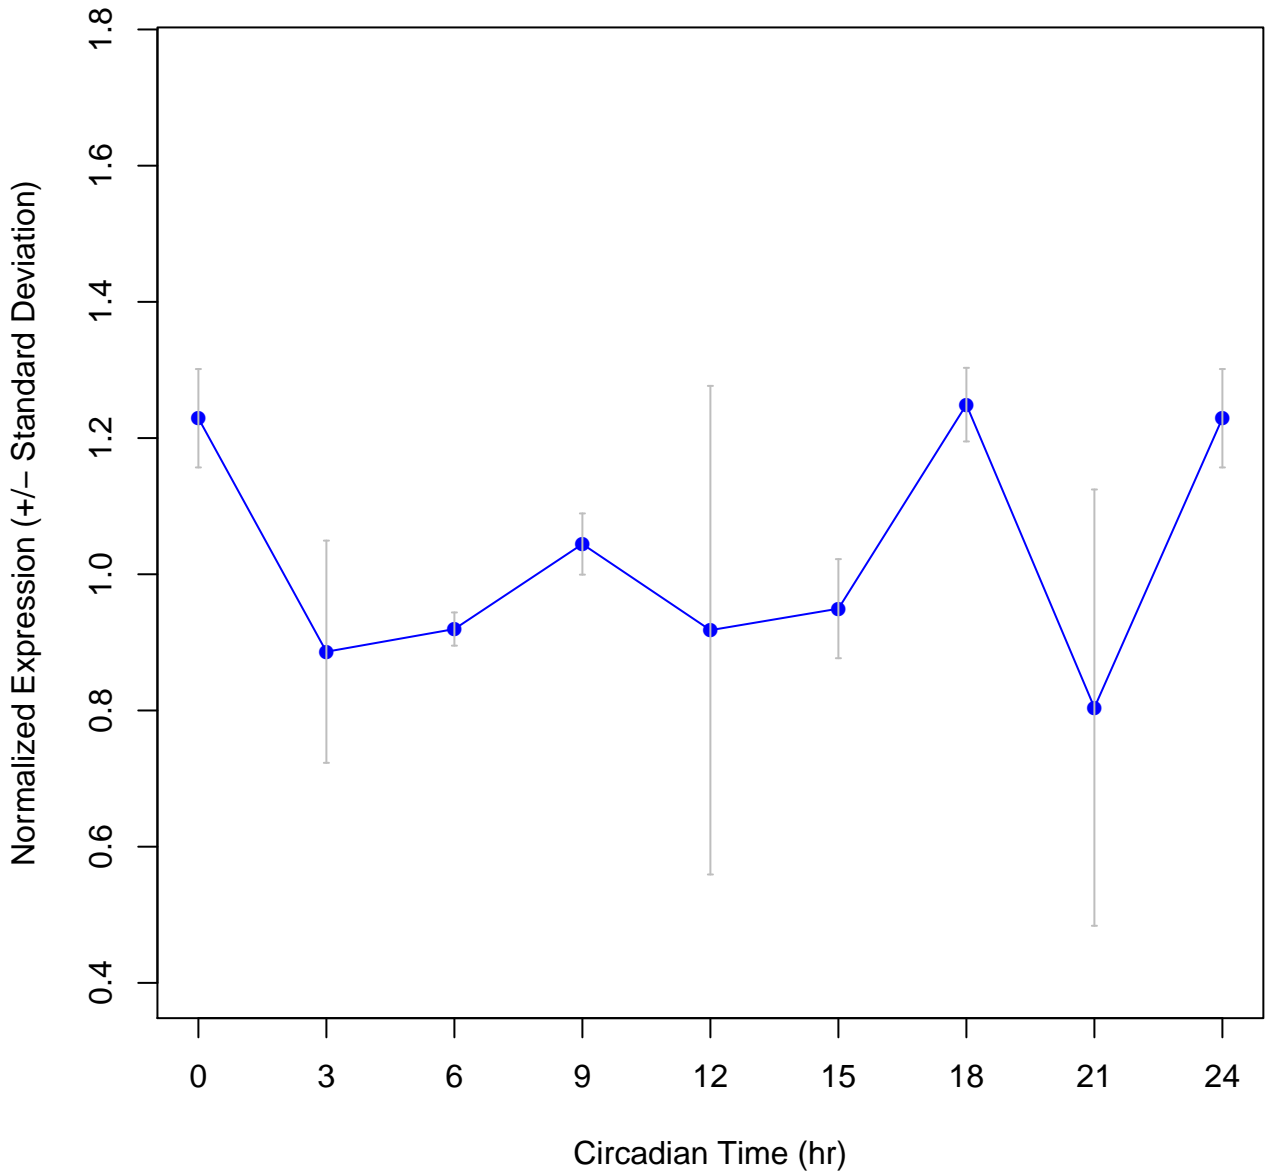



Supplement Figure 3 *irs2*

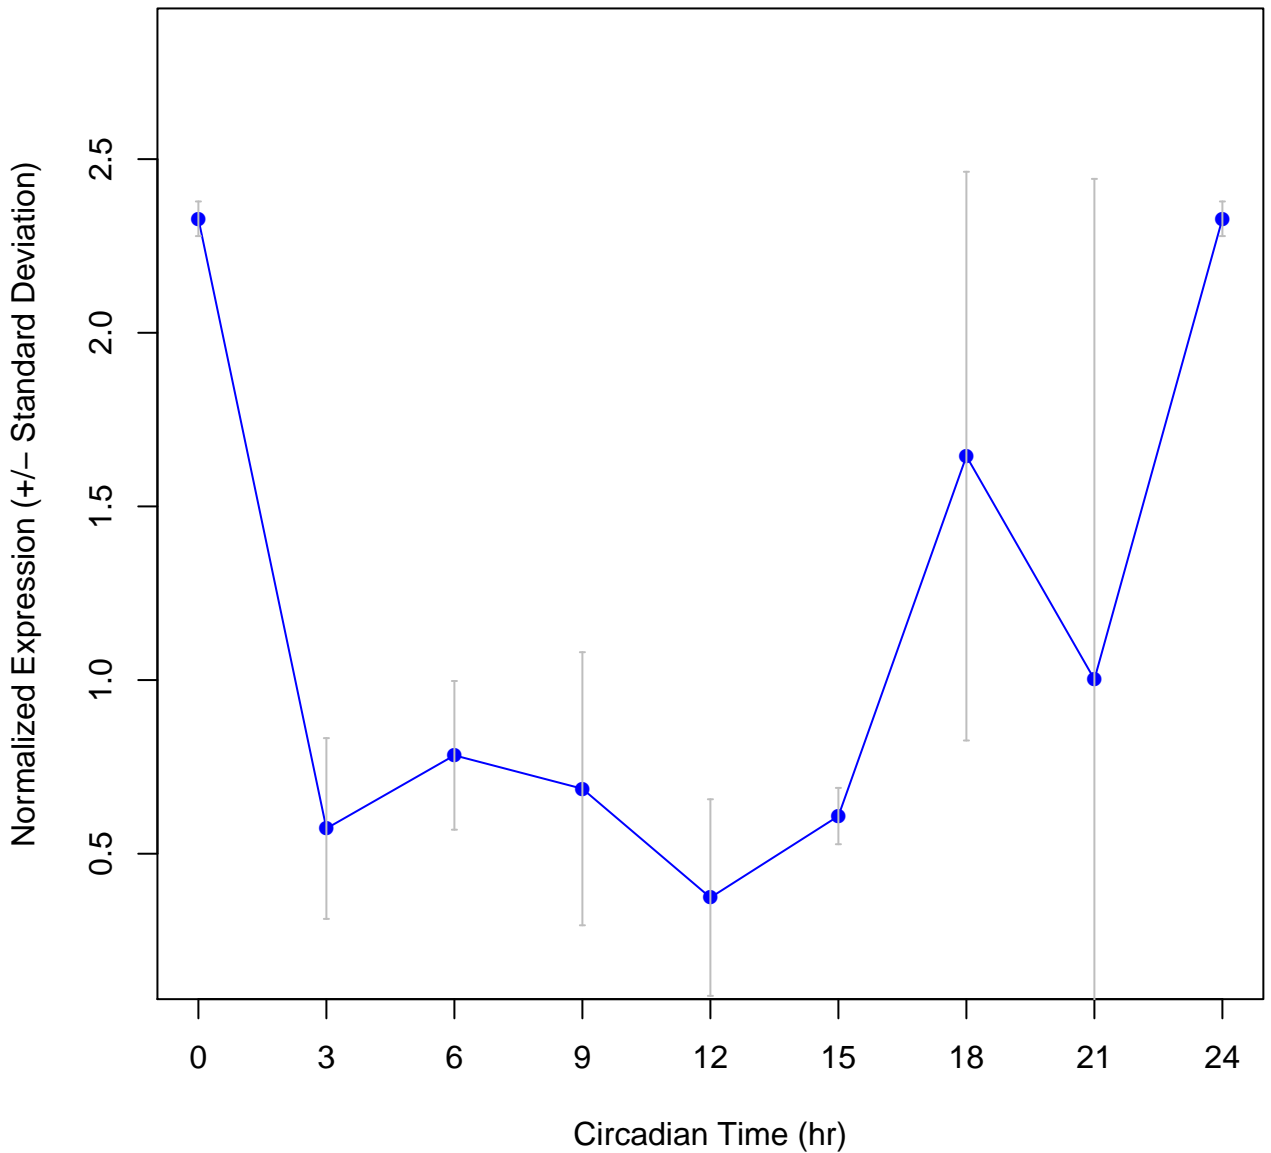

### Supplement Figure 3 itpr1

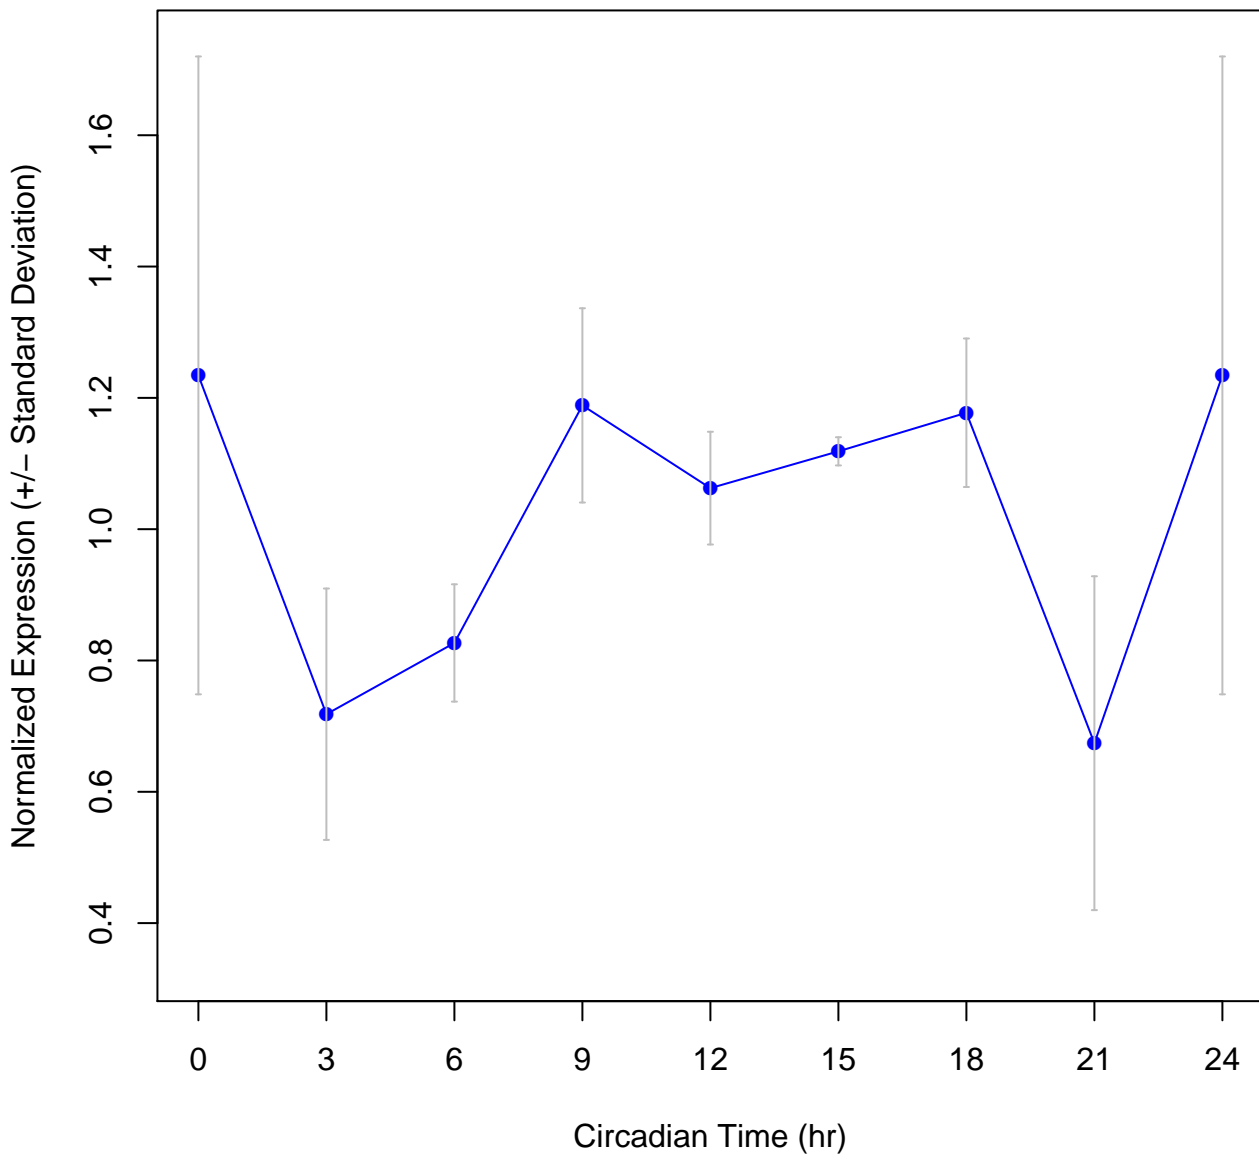

**Supplement Figure 3 itpr3**

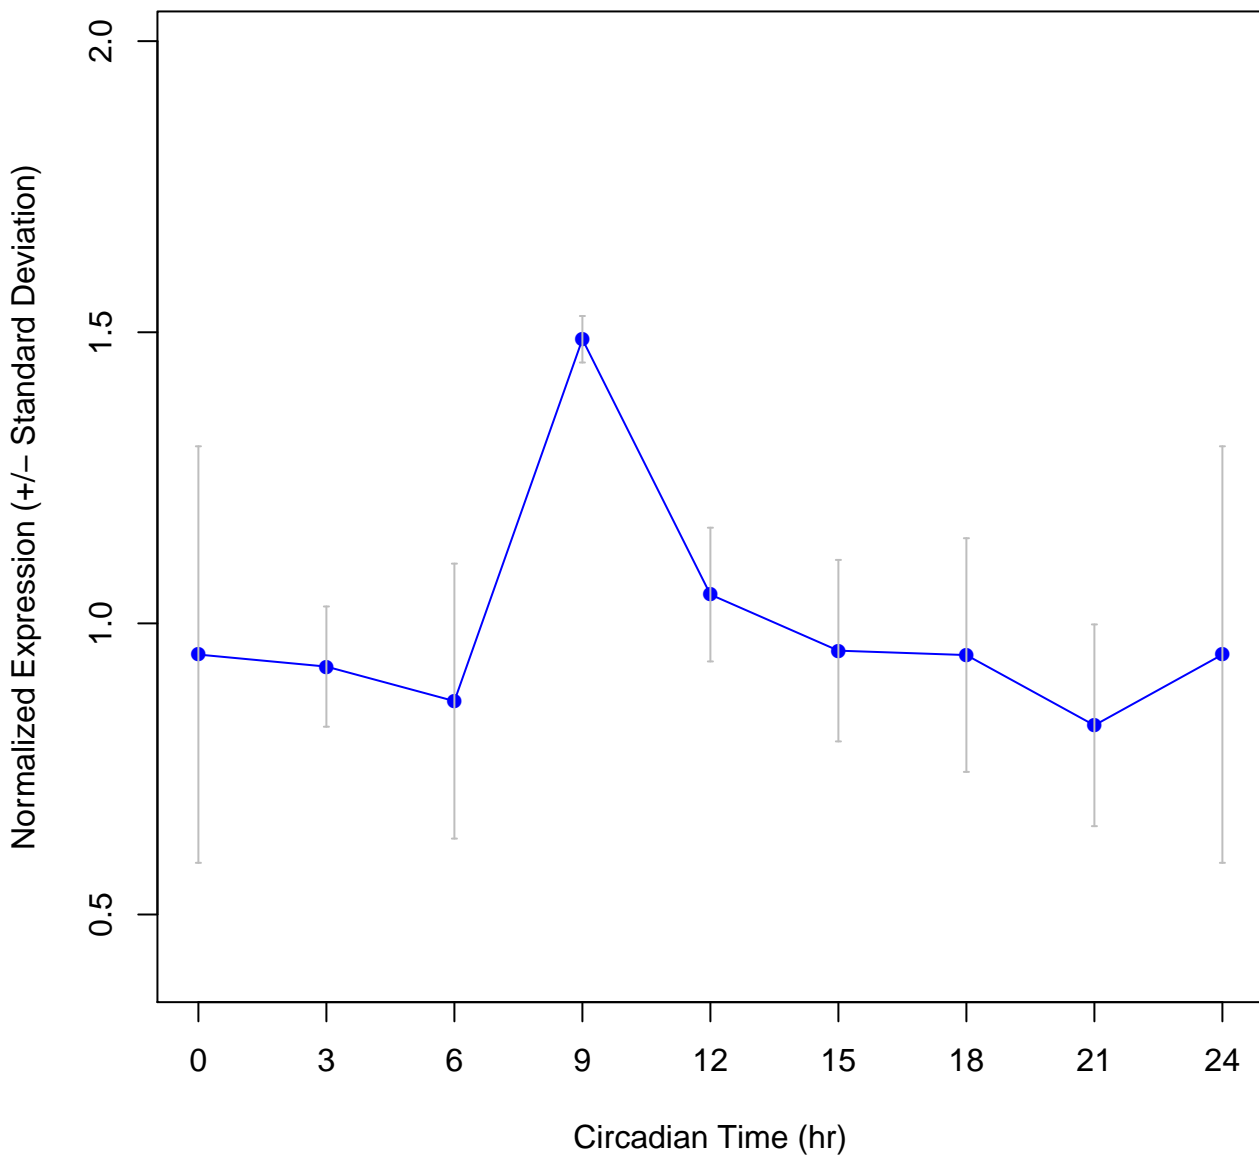

Supplement Figure 3 jun\_1

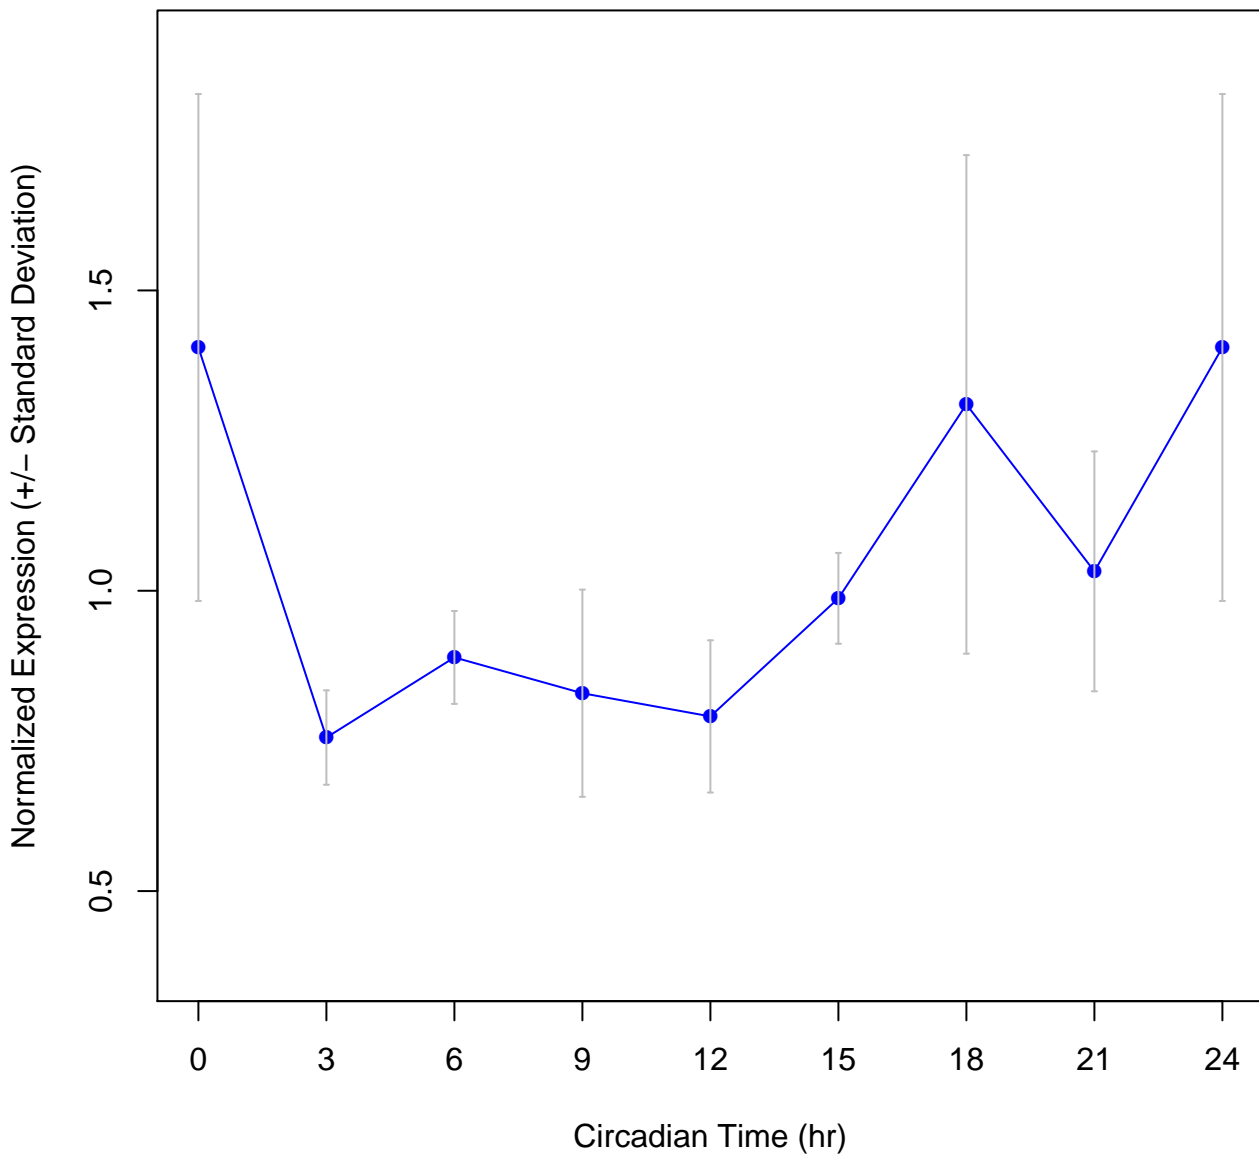

Supplement Figure 3 jun\_2

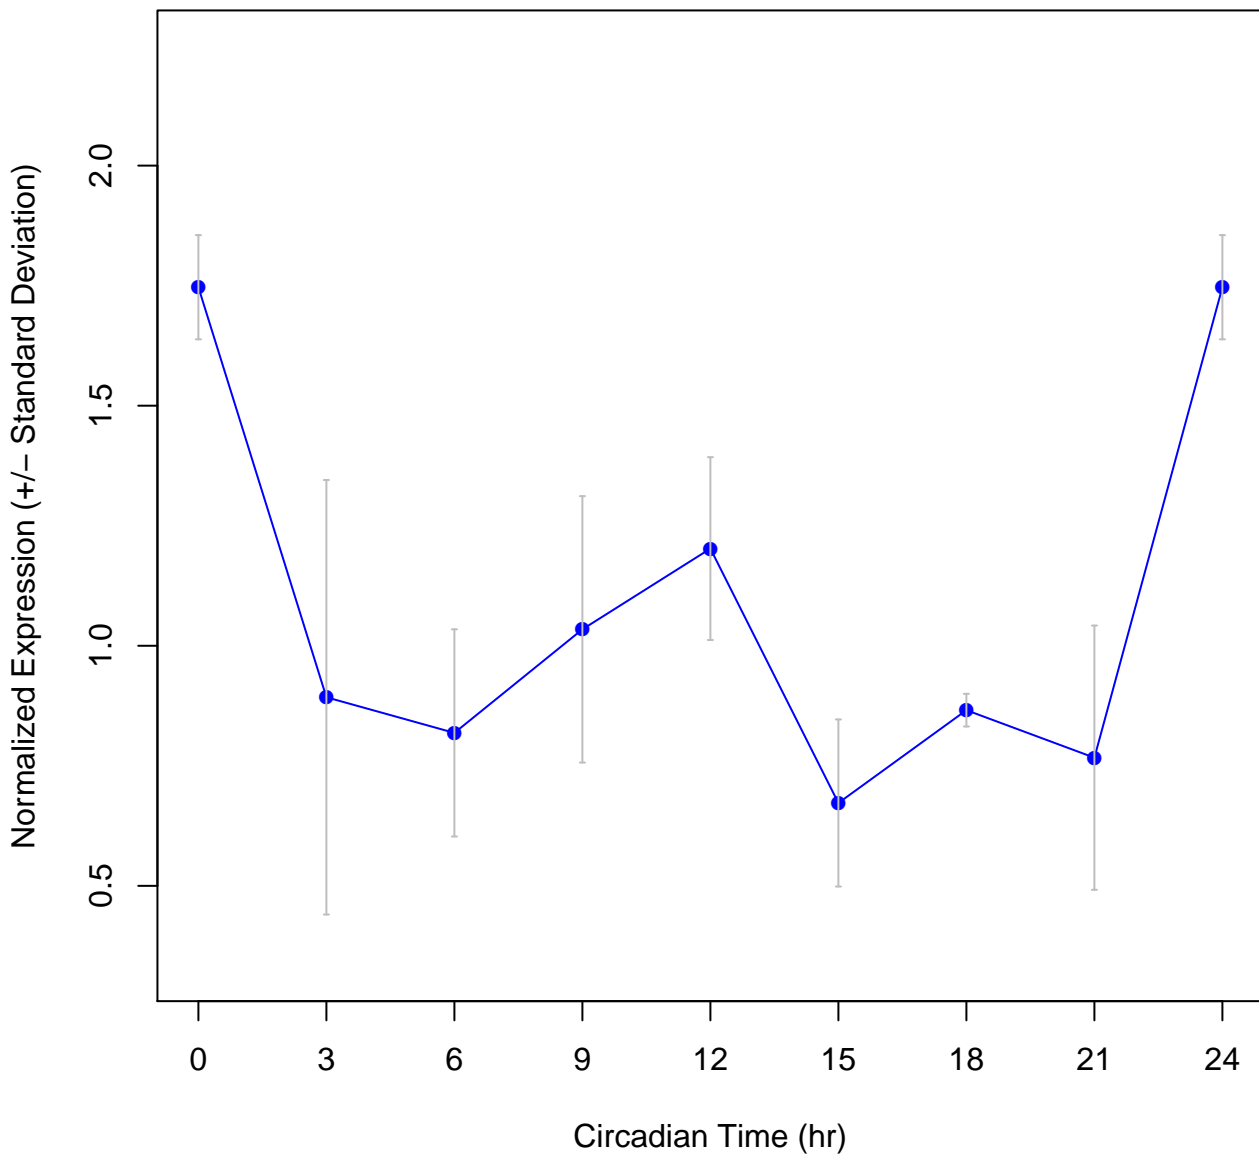

**Supplement Figure 3 kat2b**

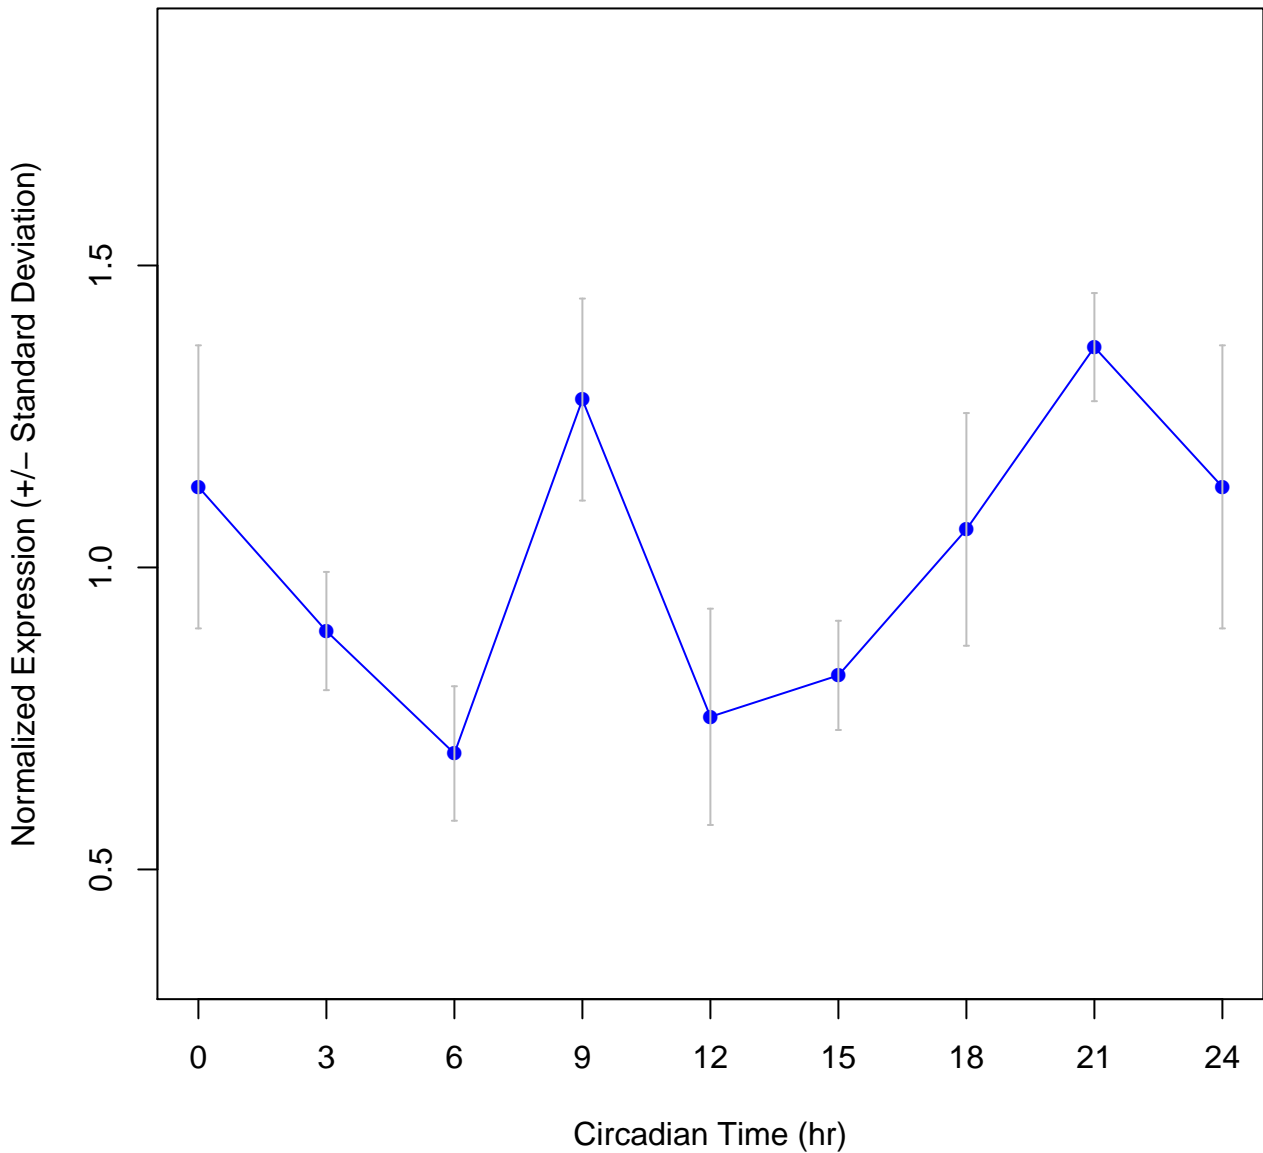

### Supplement Figure 3 kifc1

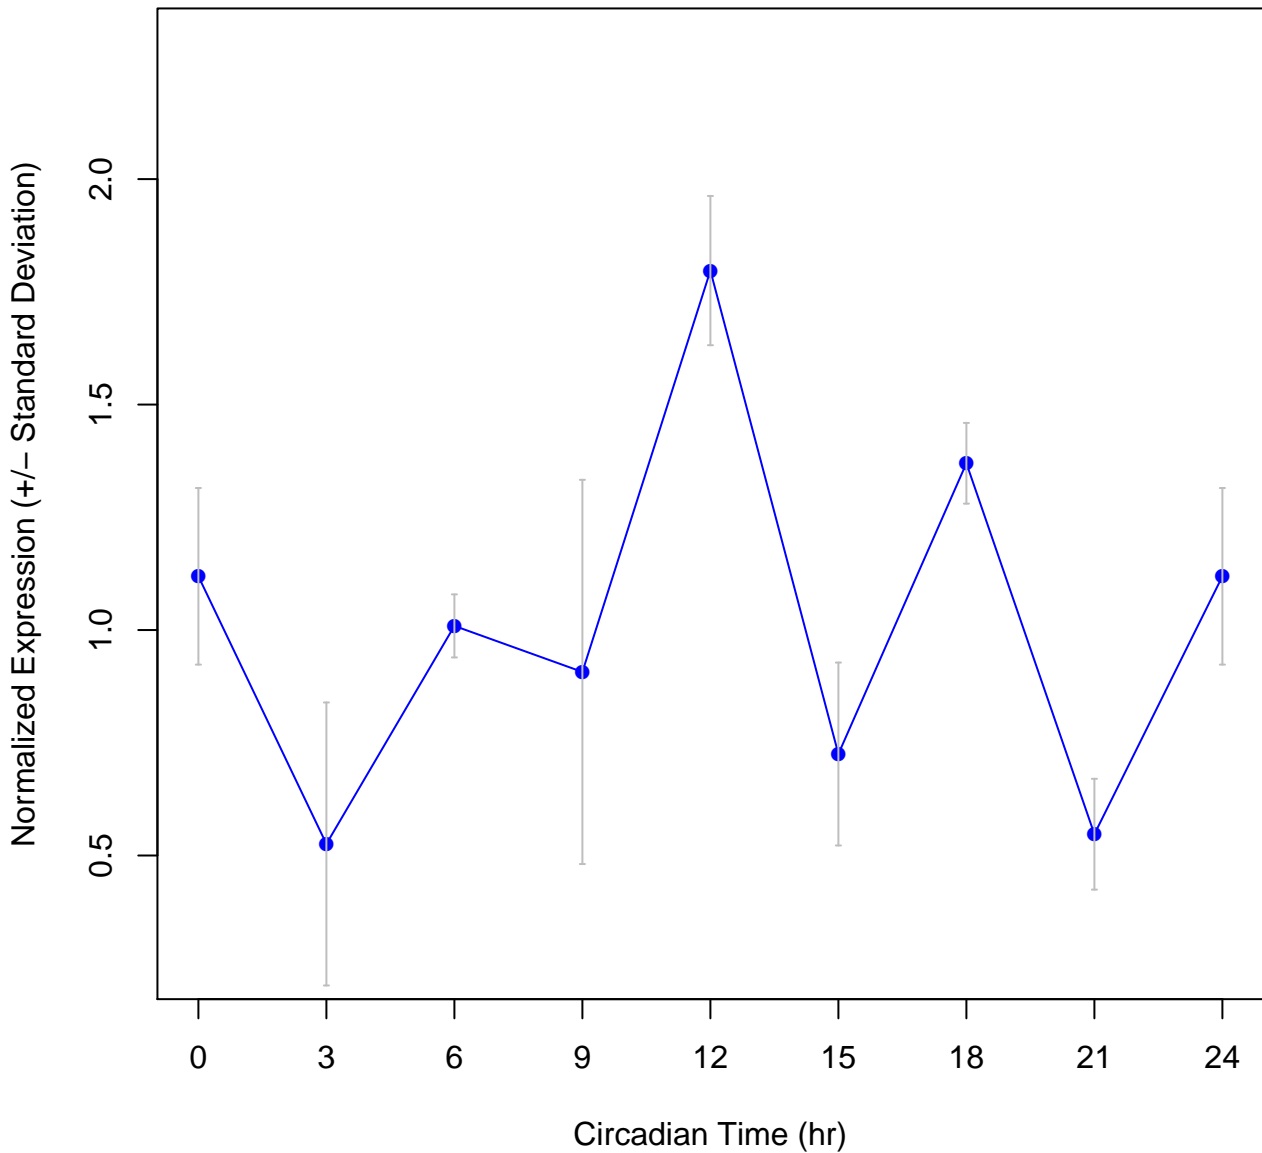

### Supplement Figure 3 kit

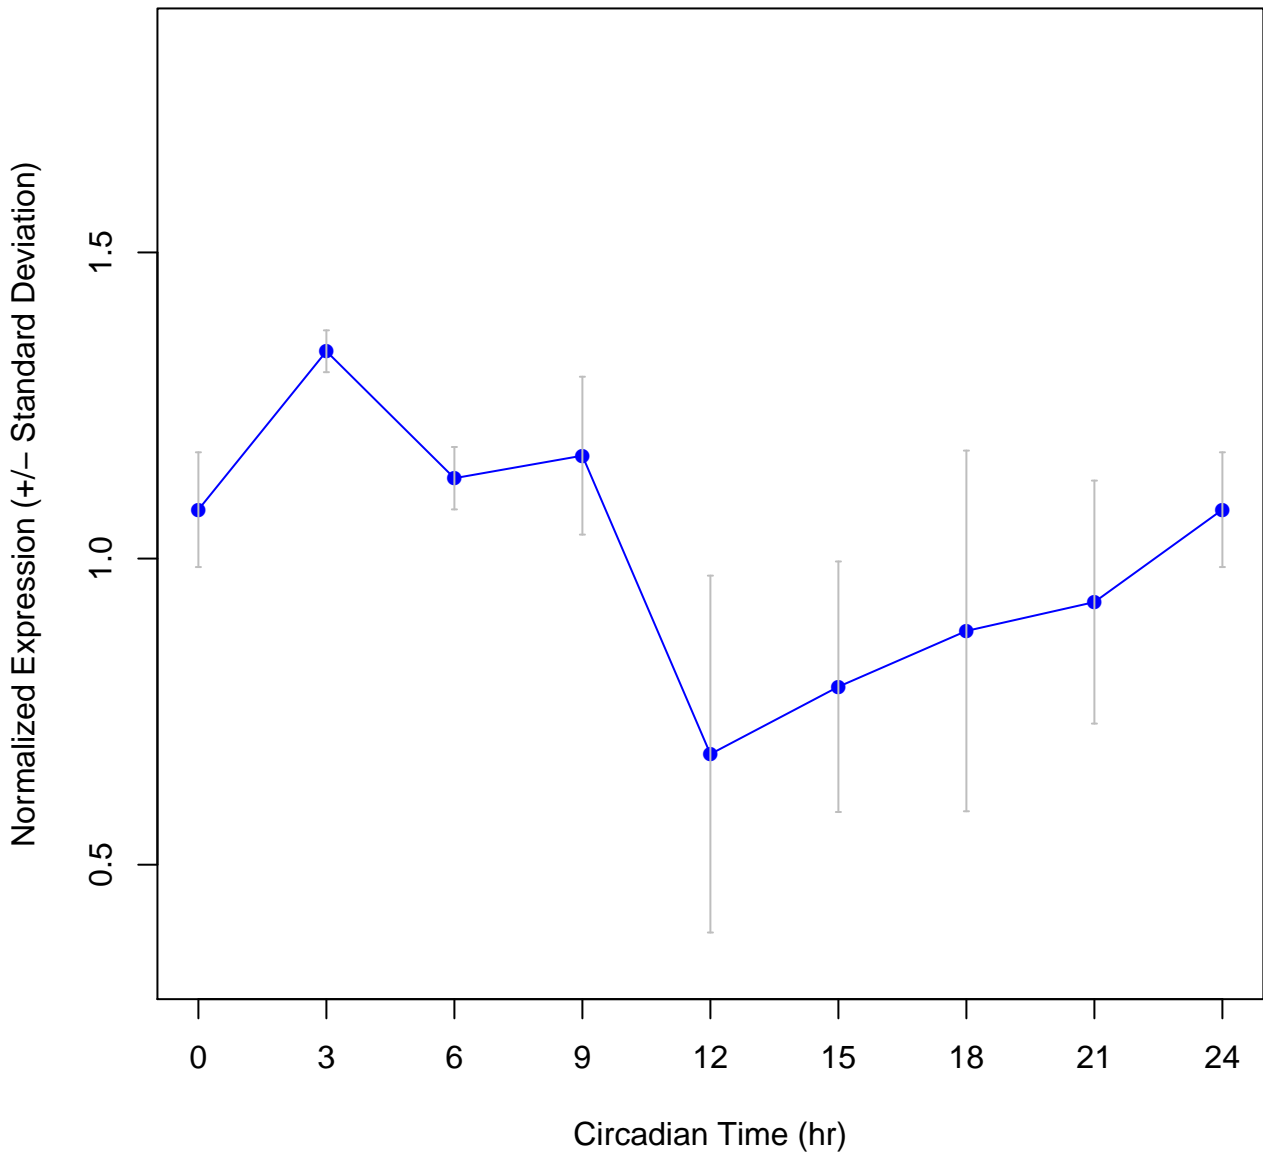



### Supplement Figure 3 klf10

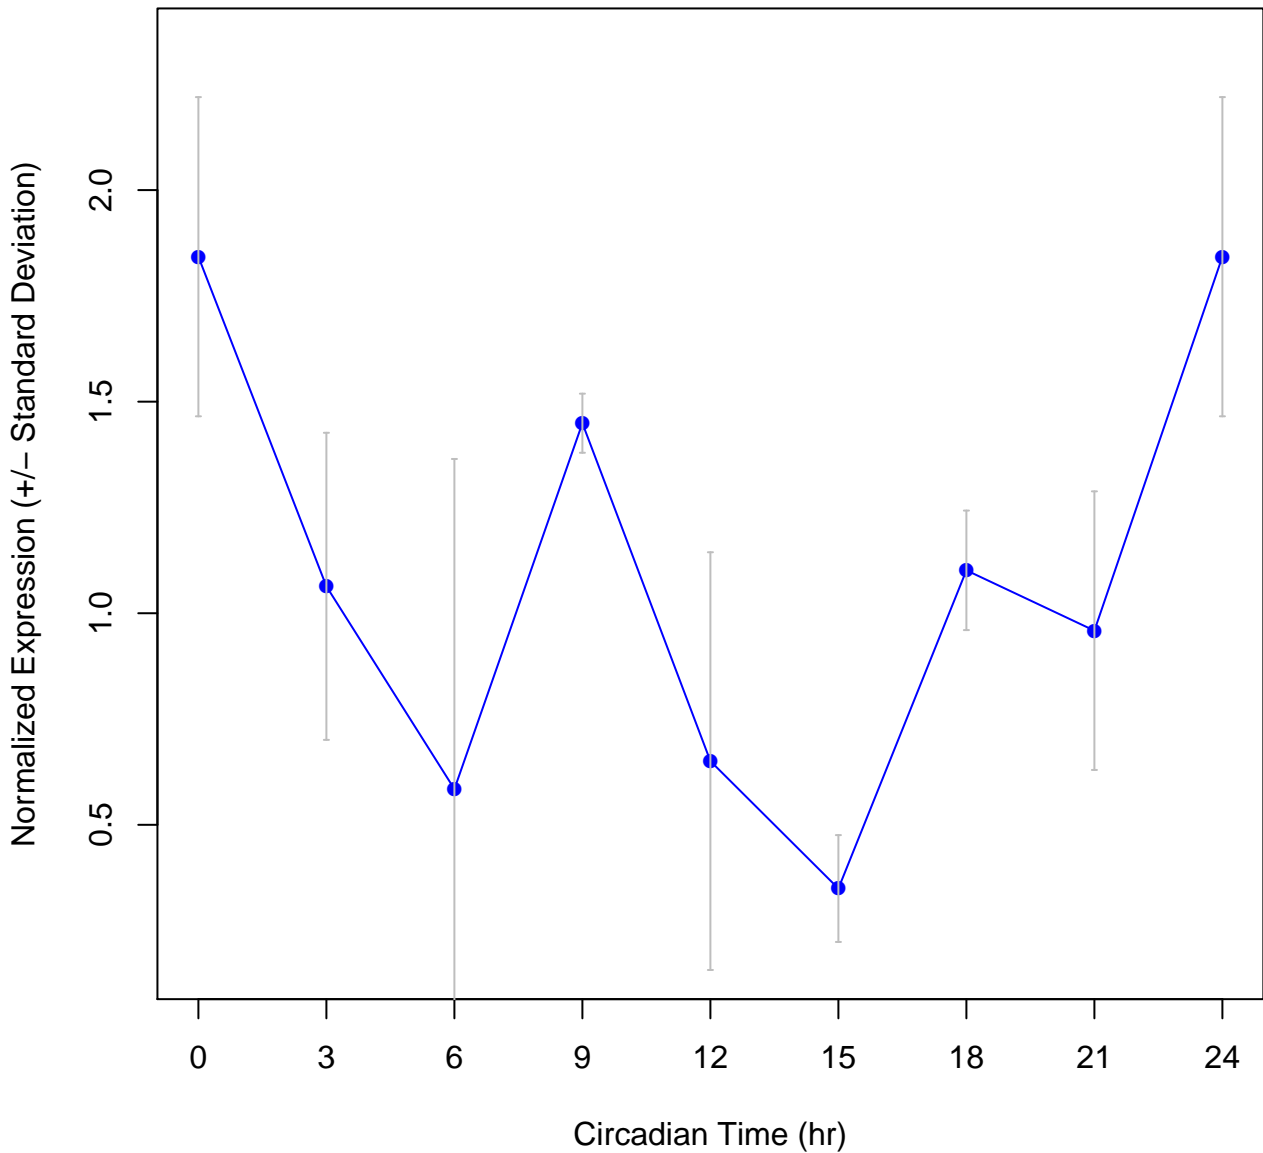

**Supplement Figure 3 klh138**

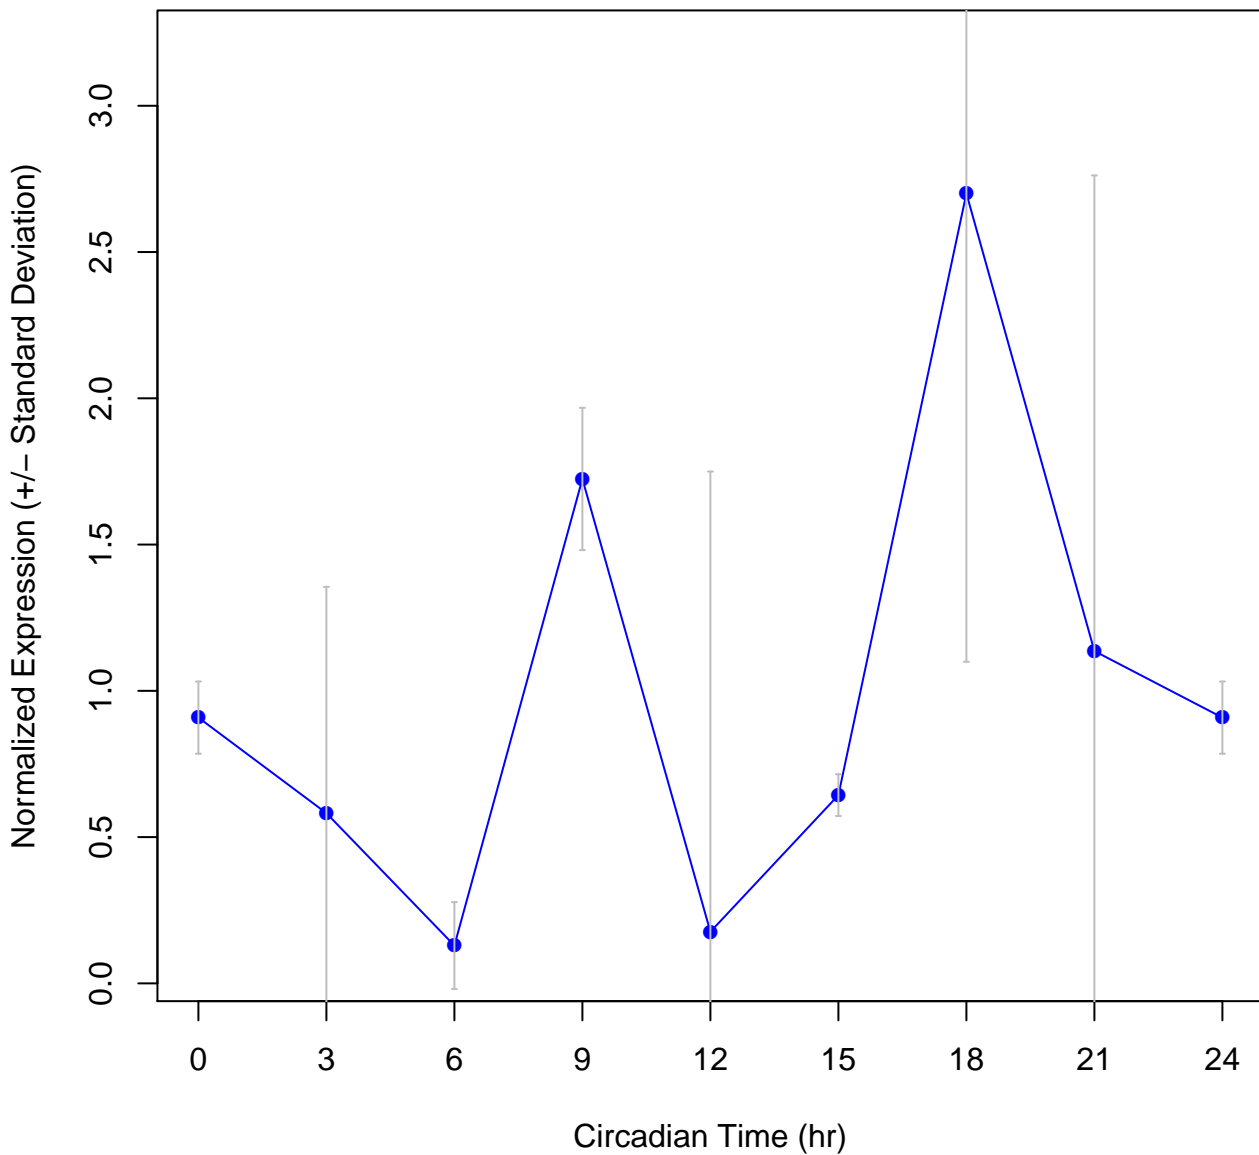

Supplement Figure 3 kmt2a

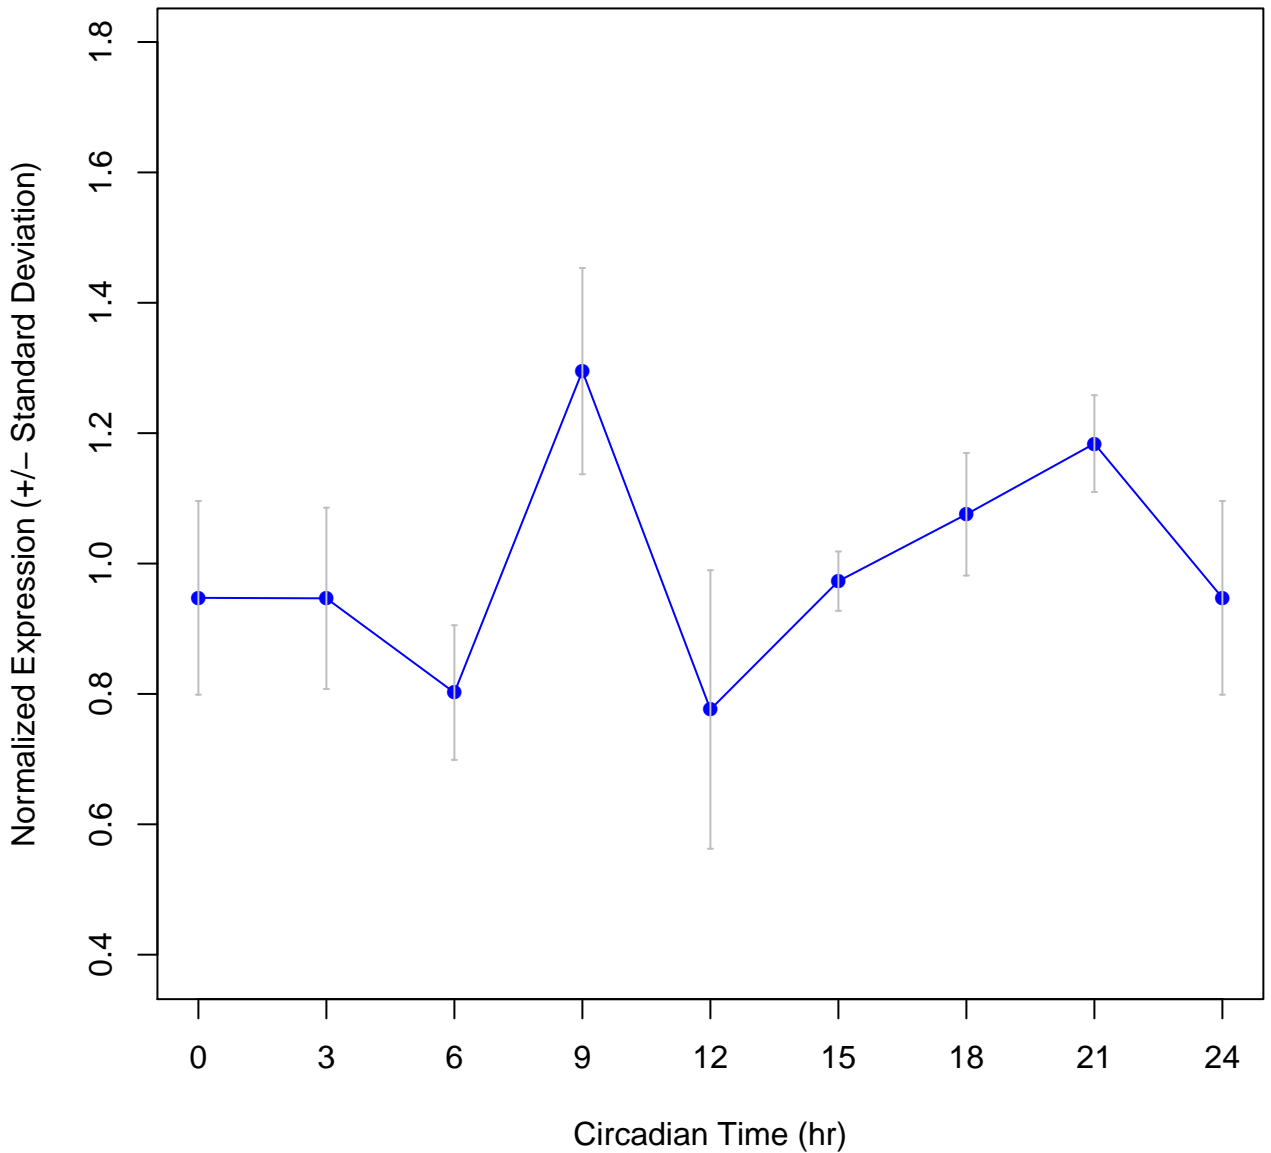

**Supplement Figure 3 kpna2**

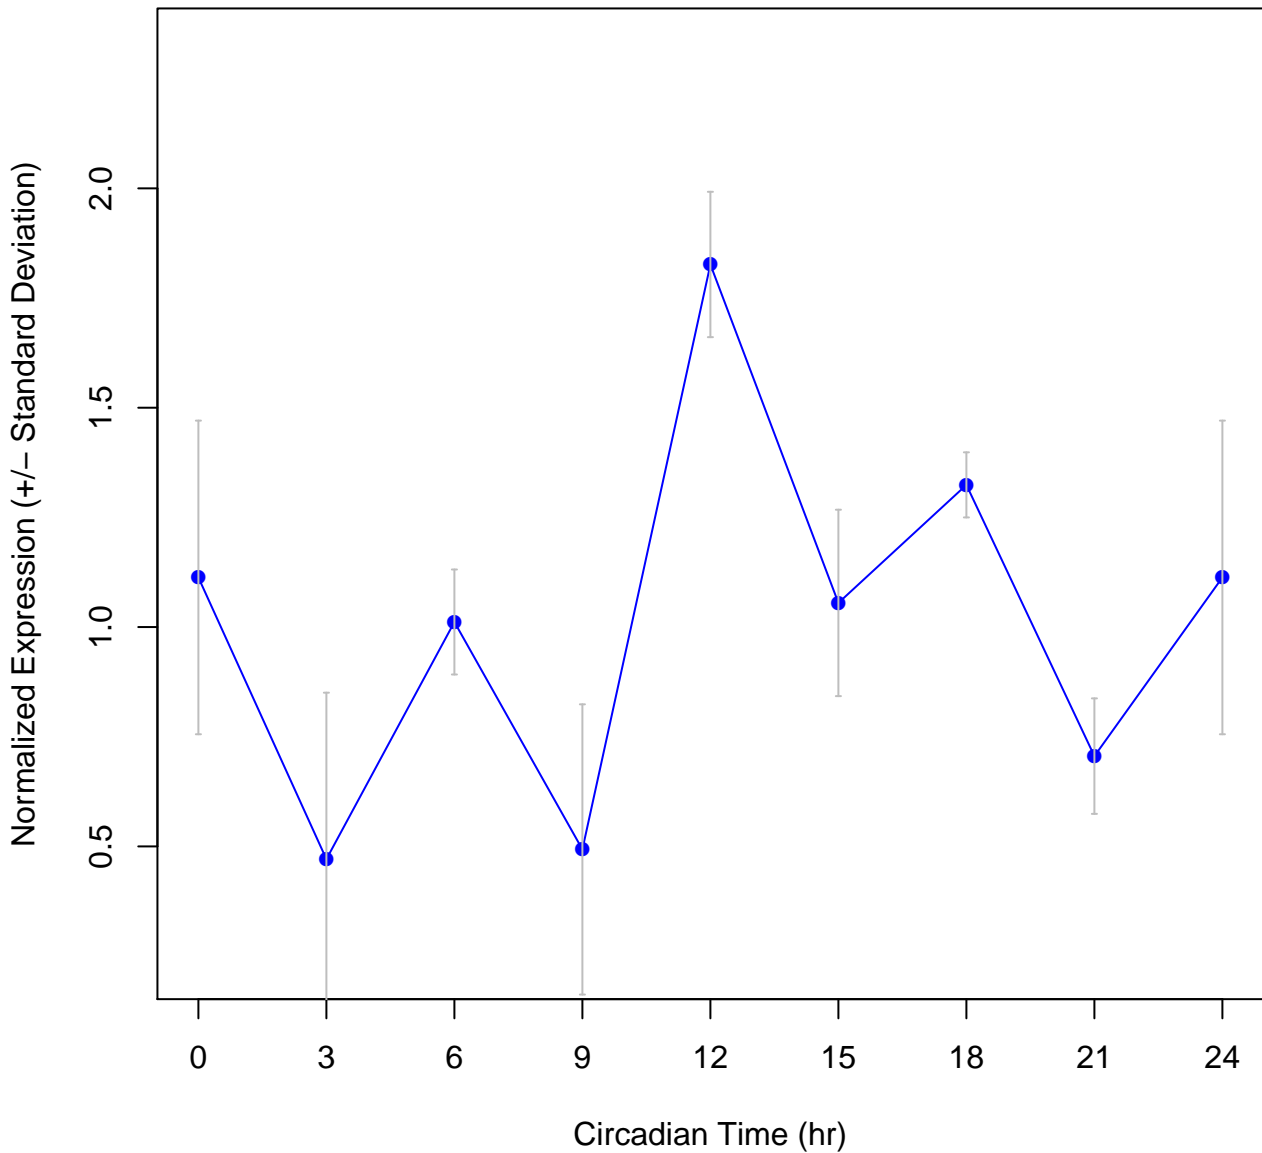

Supplement Figure 3 lcp2

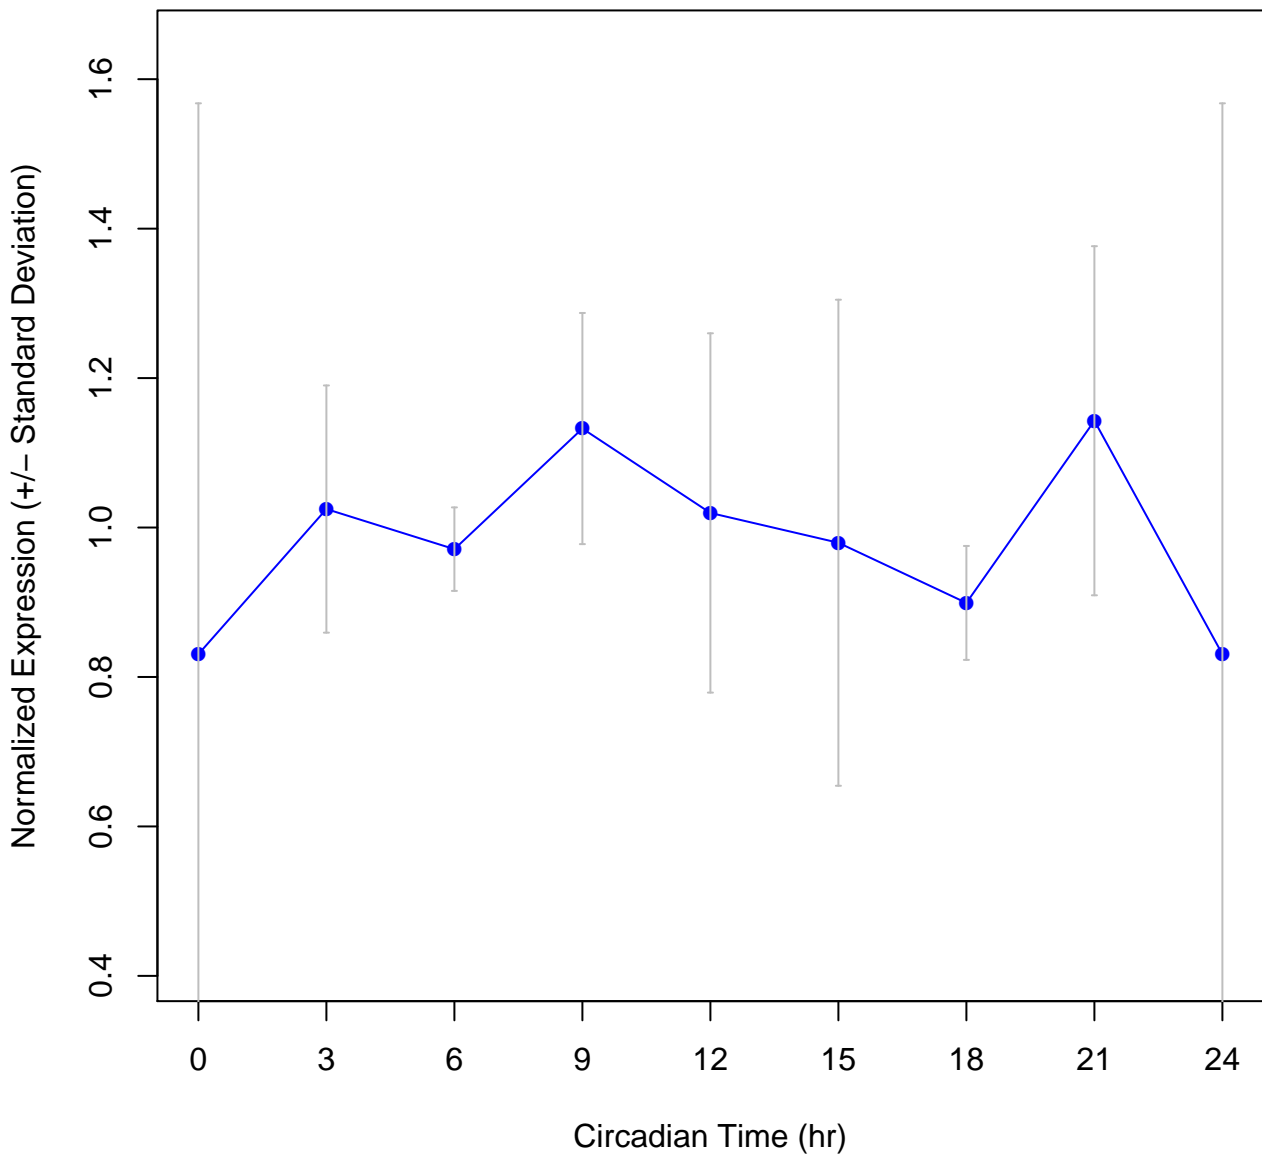

**Supplement Figure 3 Ikb1**

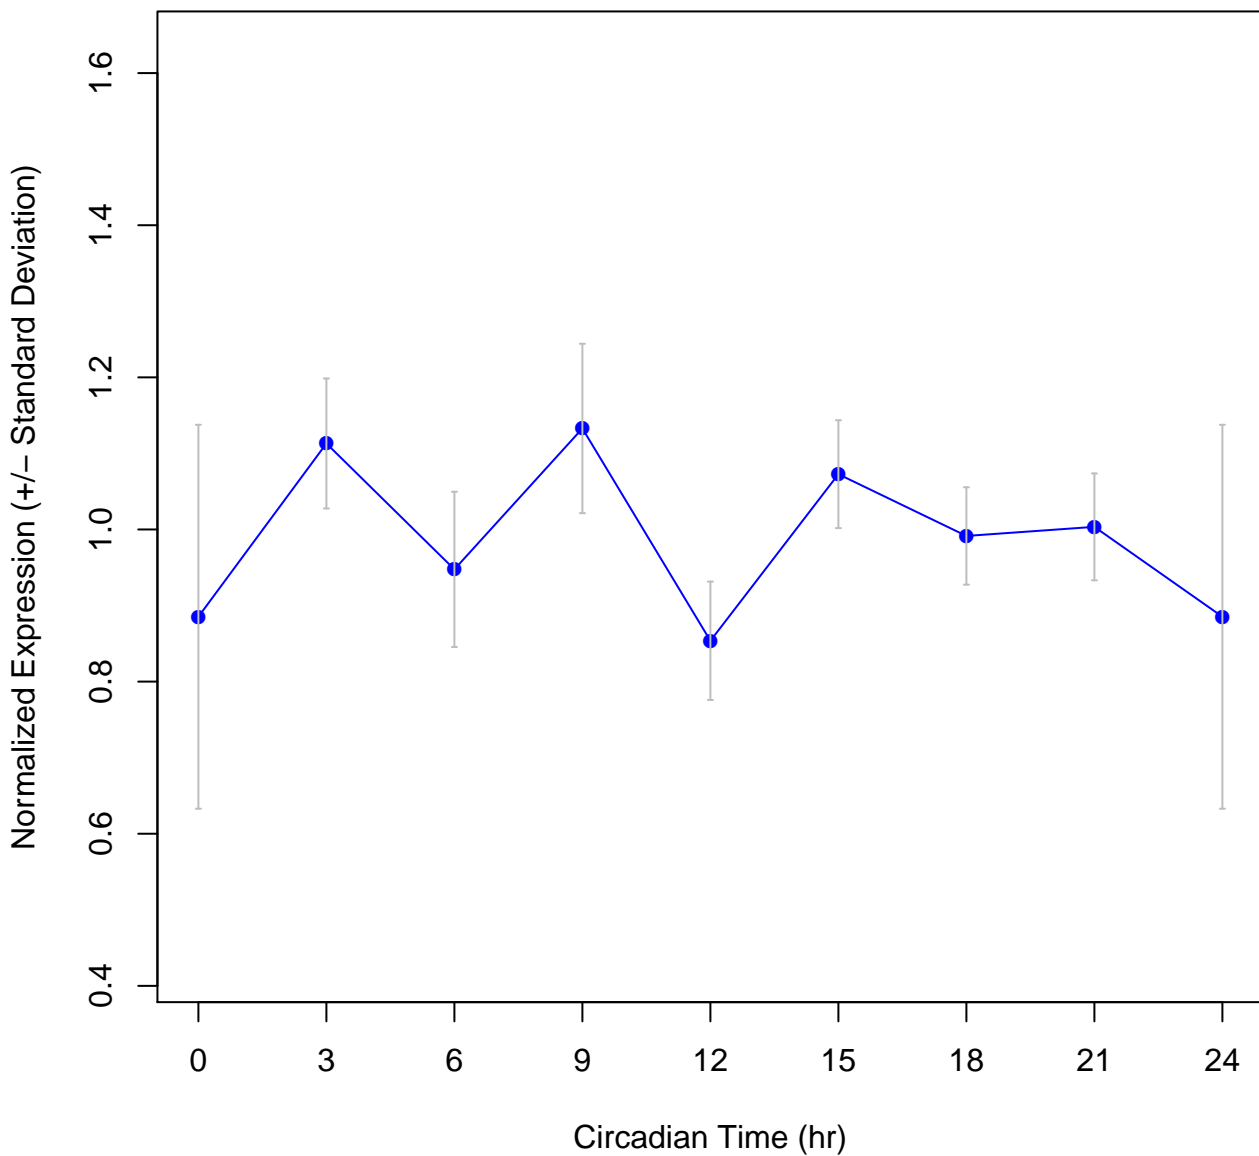

**Supplement Figure 3 Ipin1**

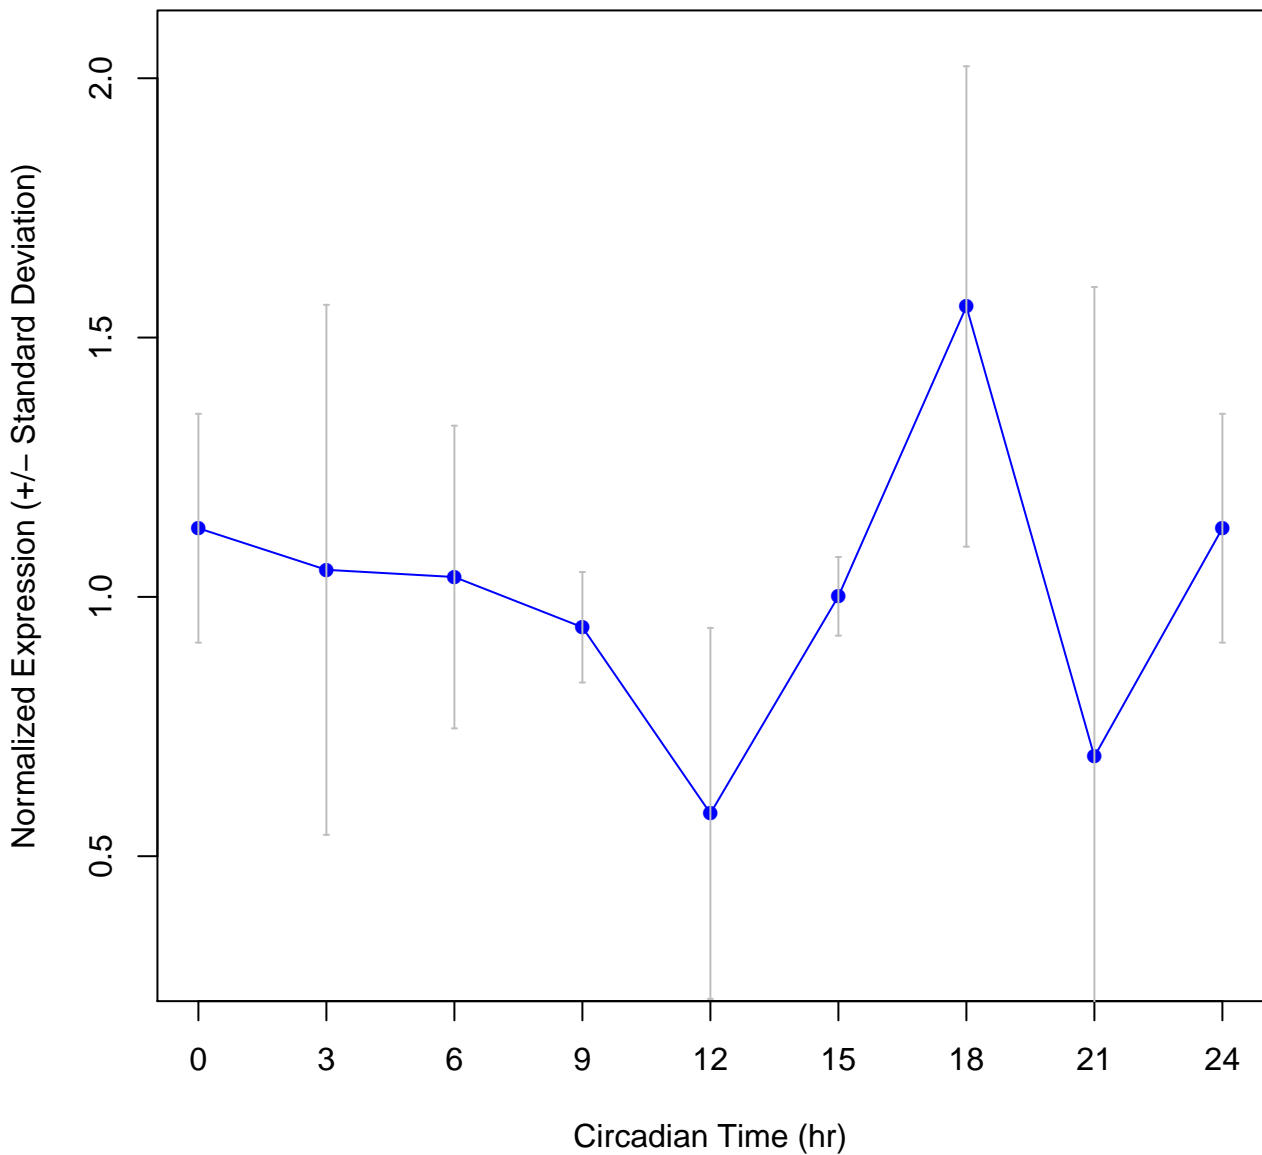

**Supplement Figure 3 mad211**

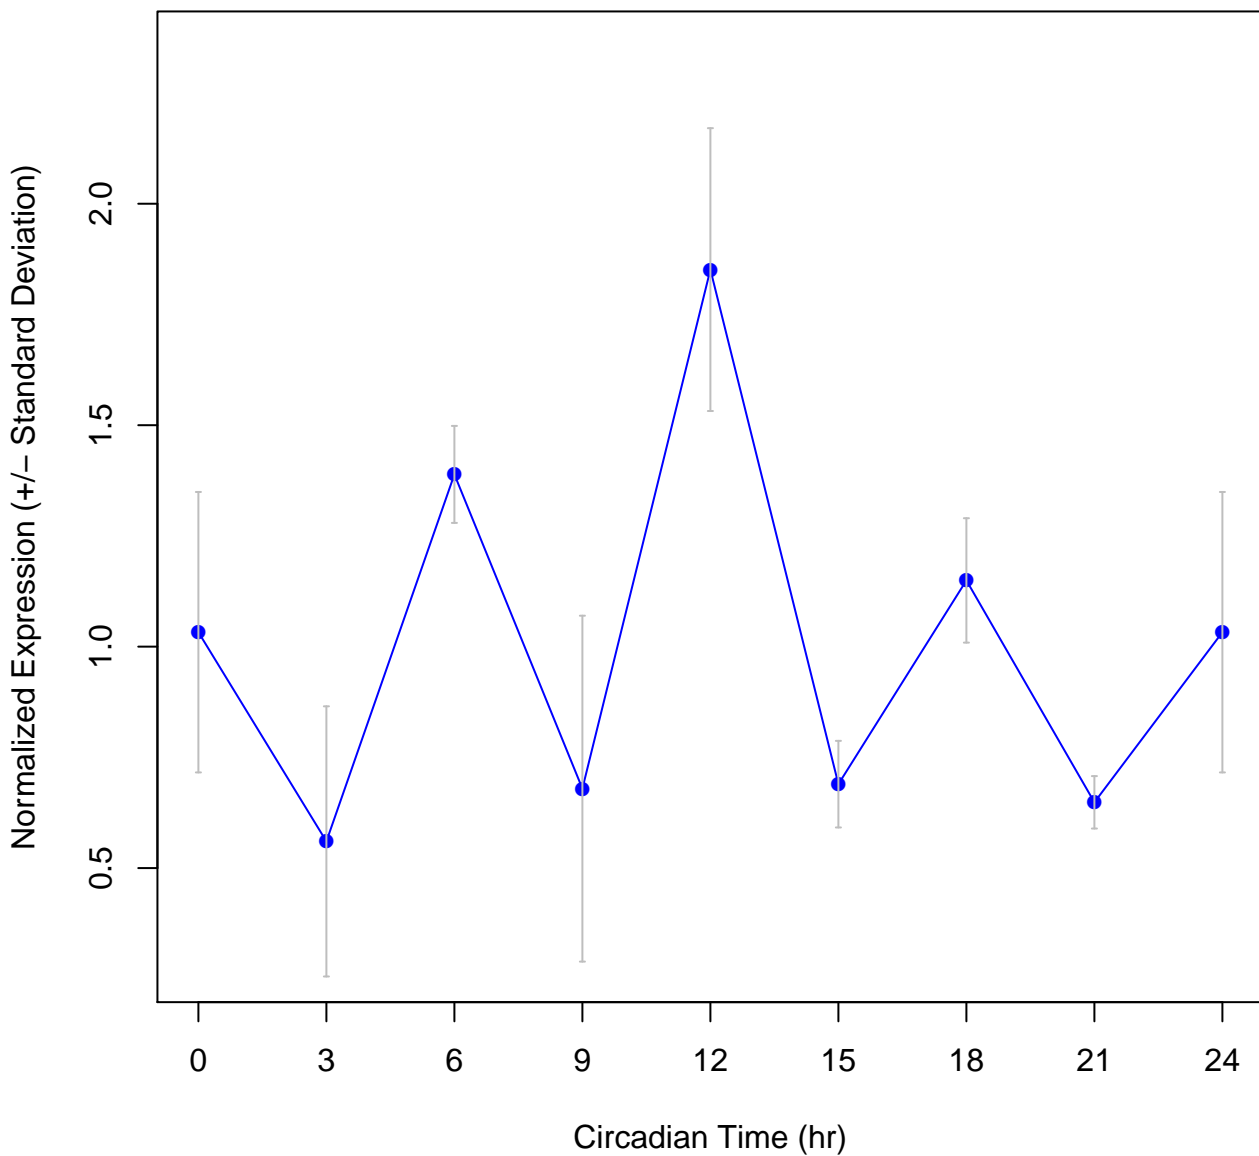



Supplement Figure 3 map2k1

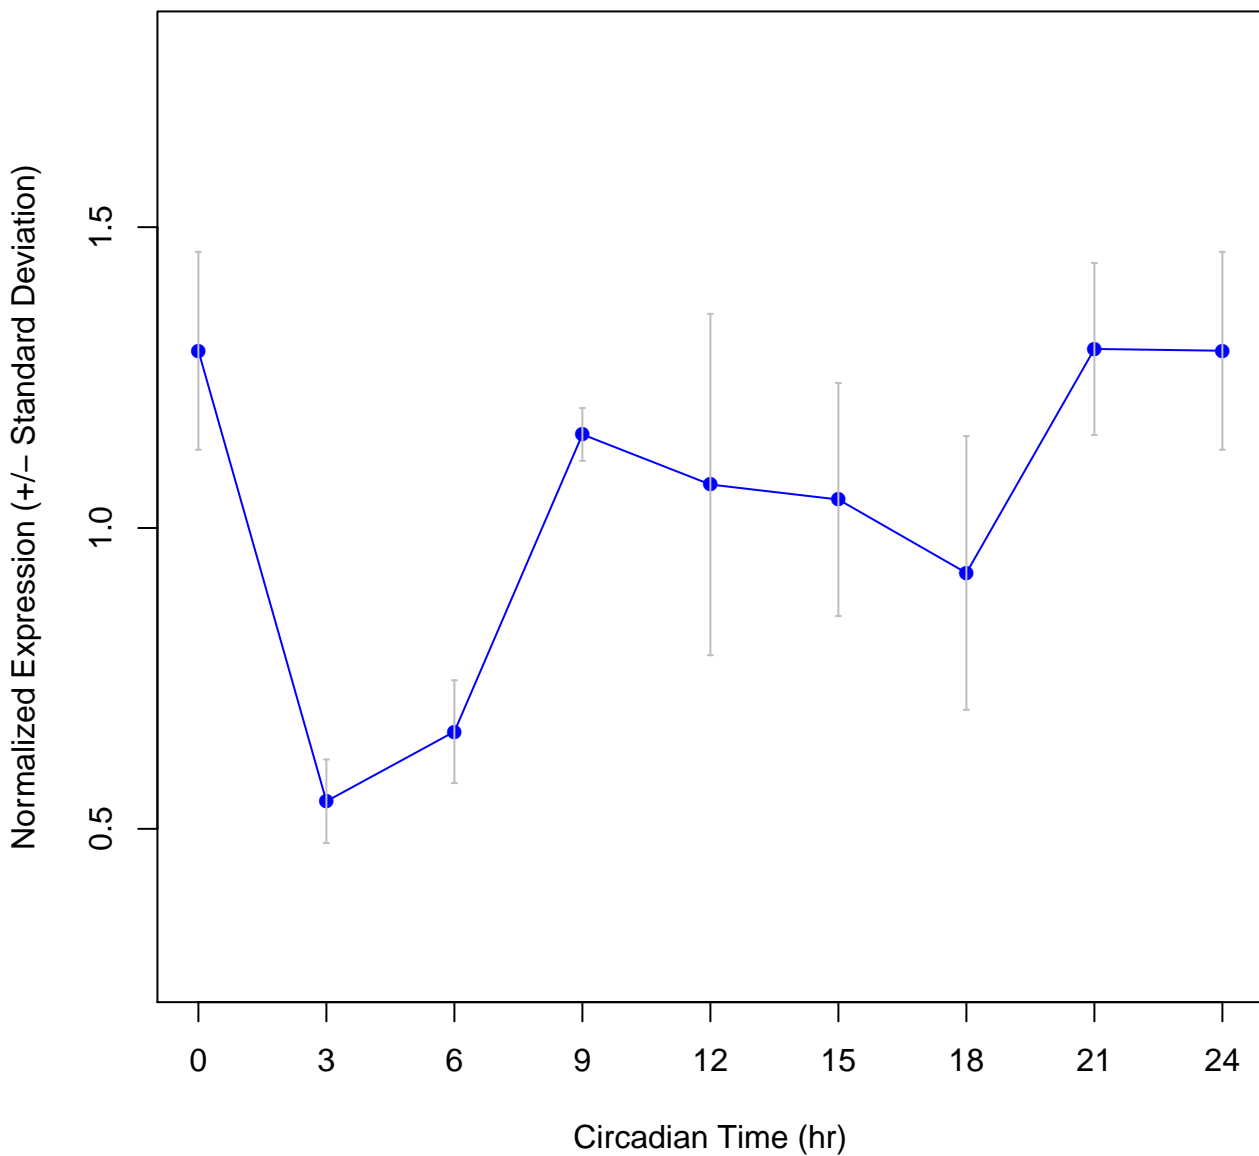

Supplement Figure 3 map2k6

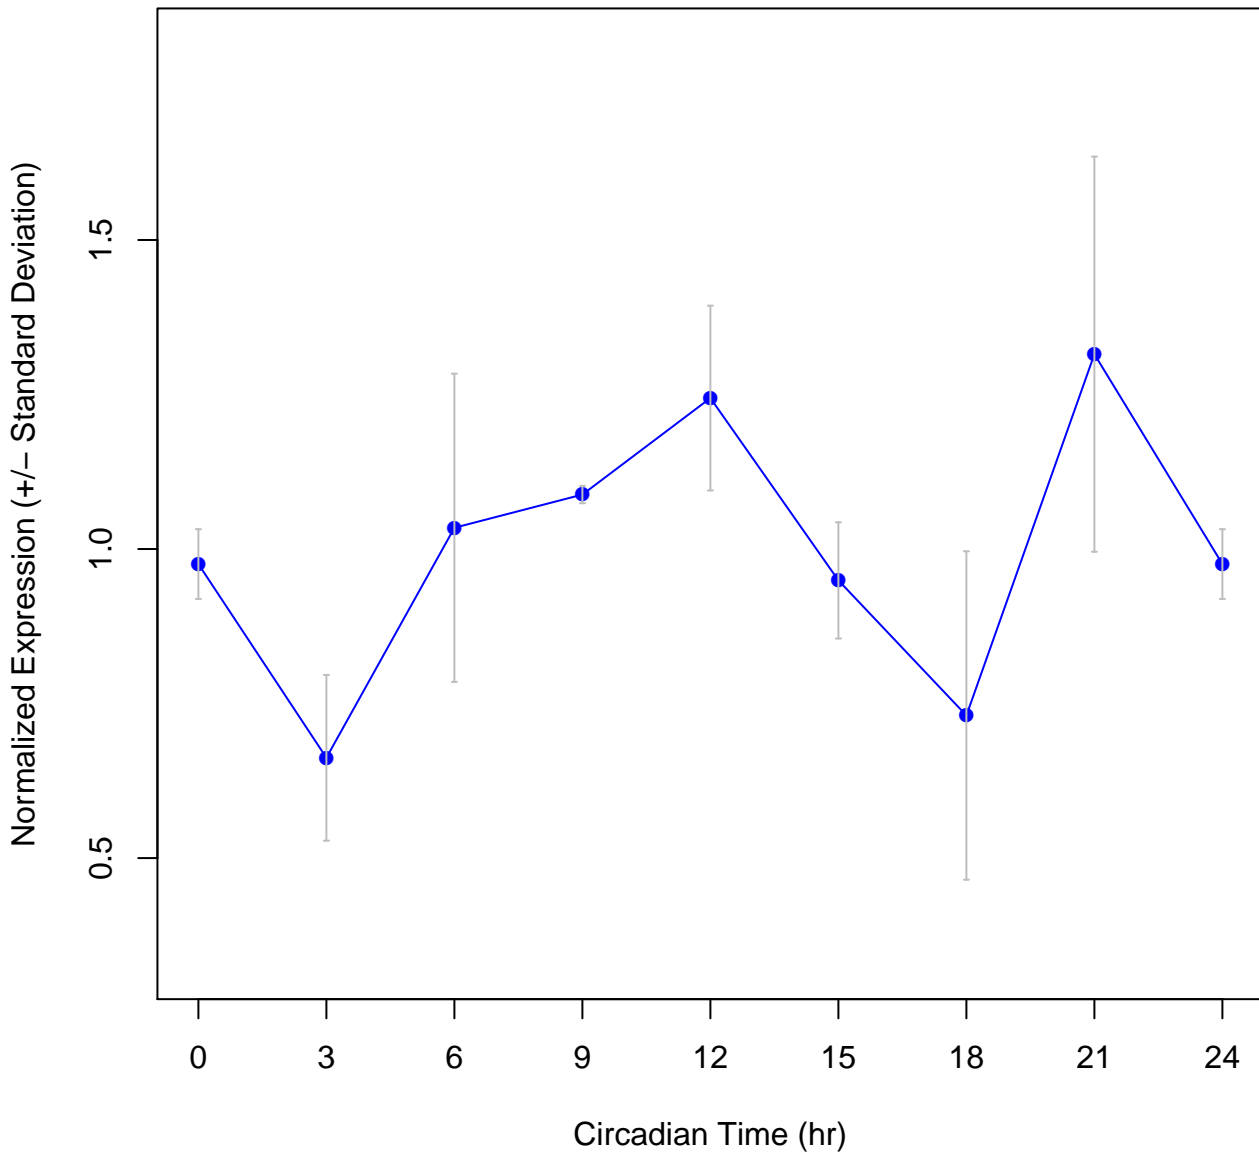

**Supplement Figure 3 mcl1**

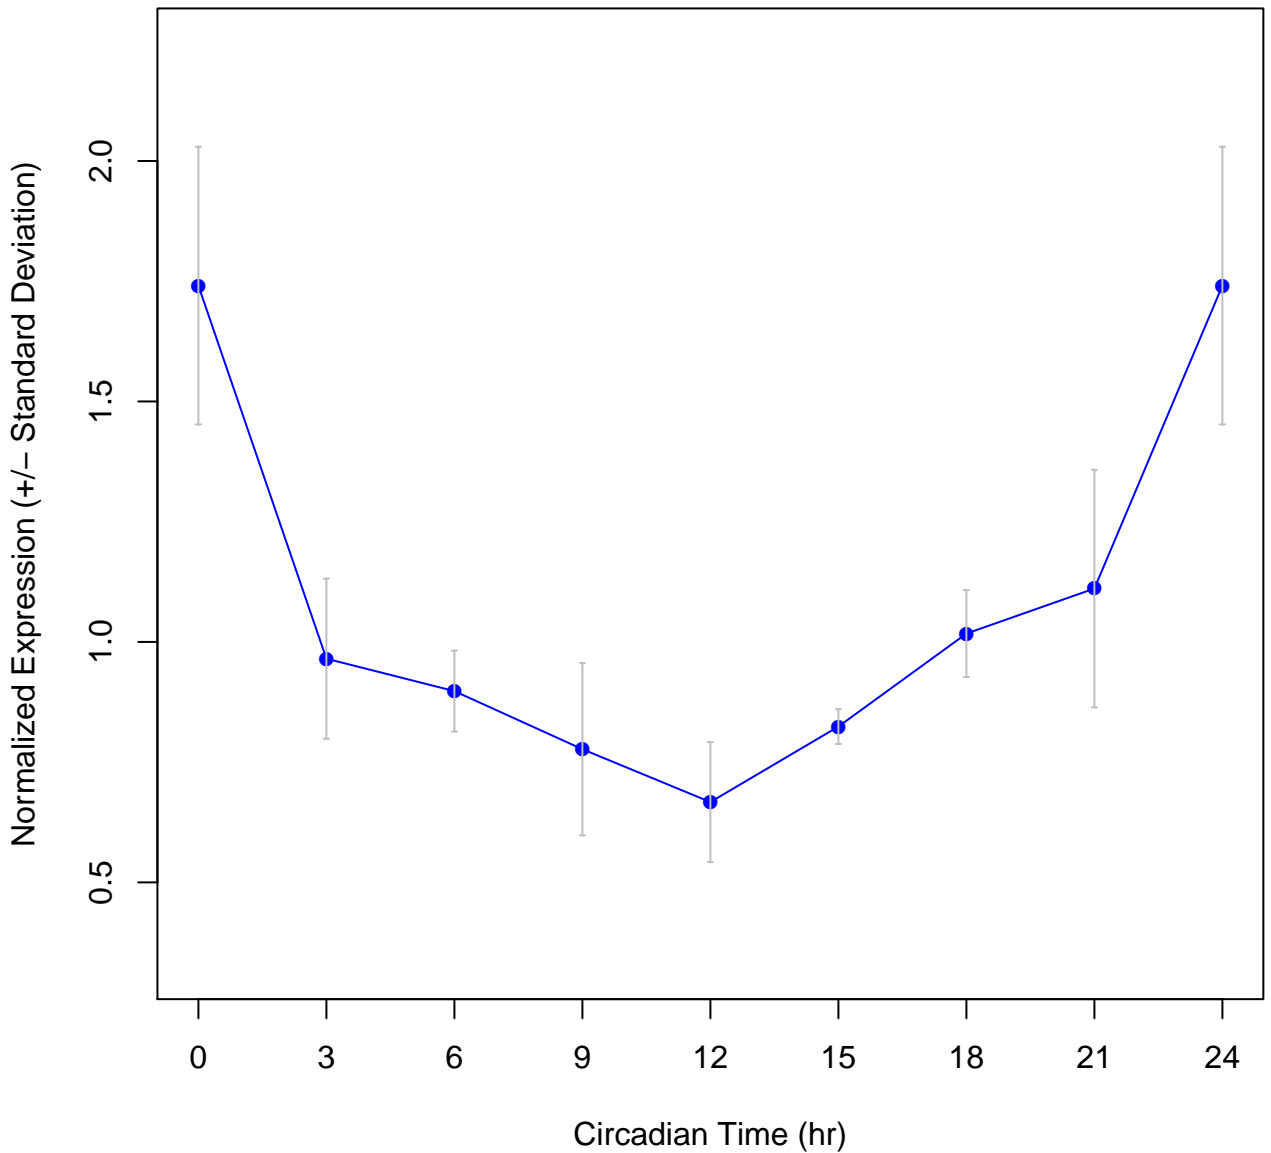

Supplement Figure 3 me1

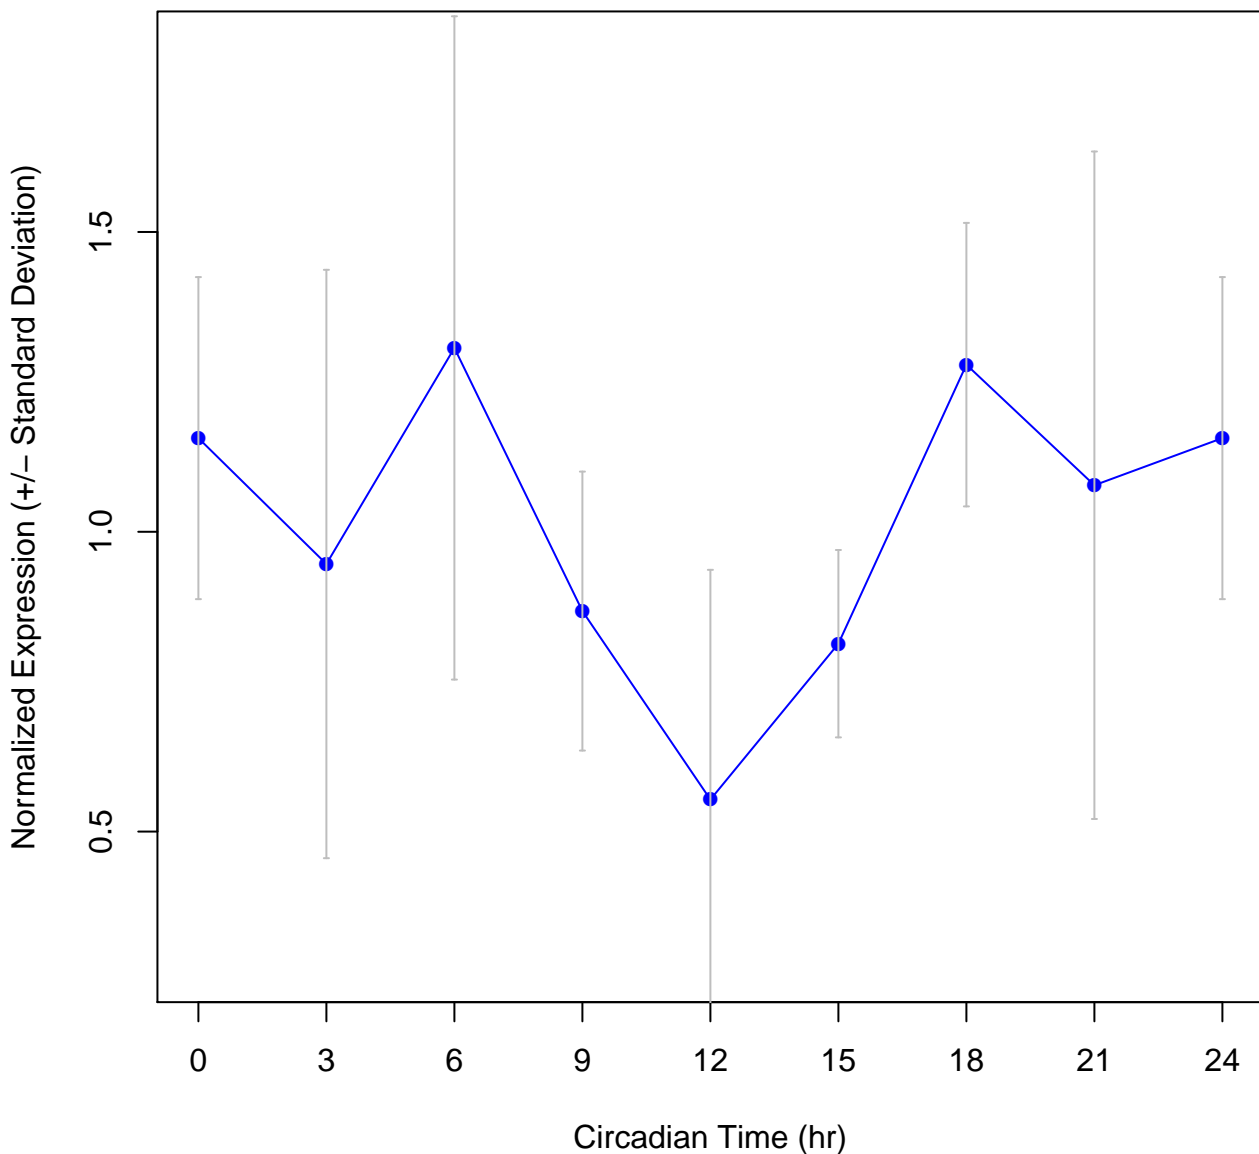

Supplement Figure 3 mgst1

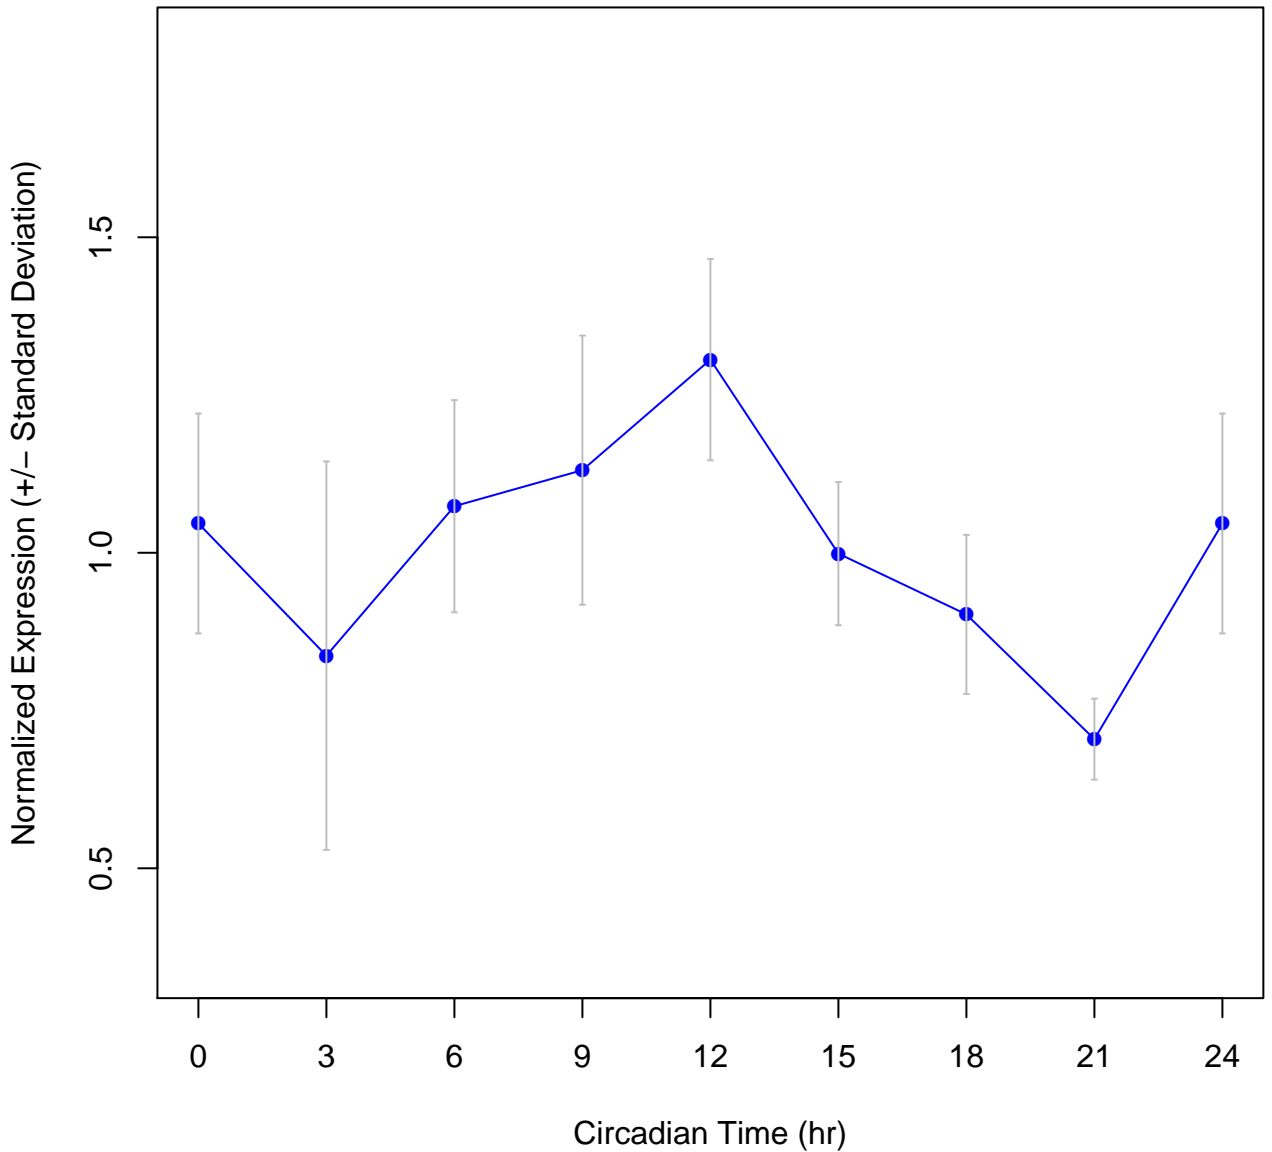

Supplement Figure 3 mitf

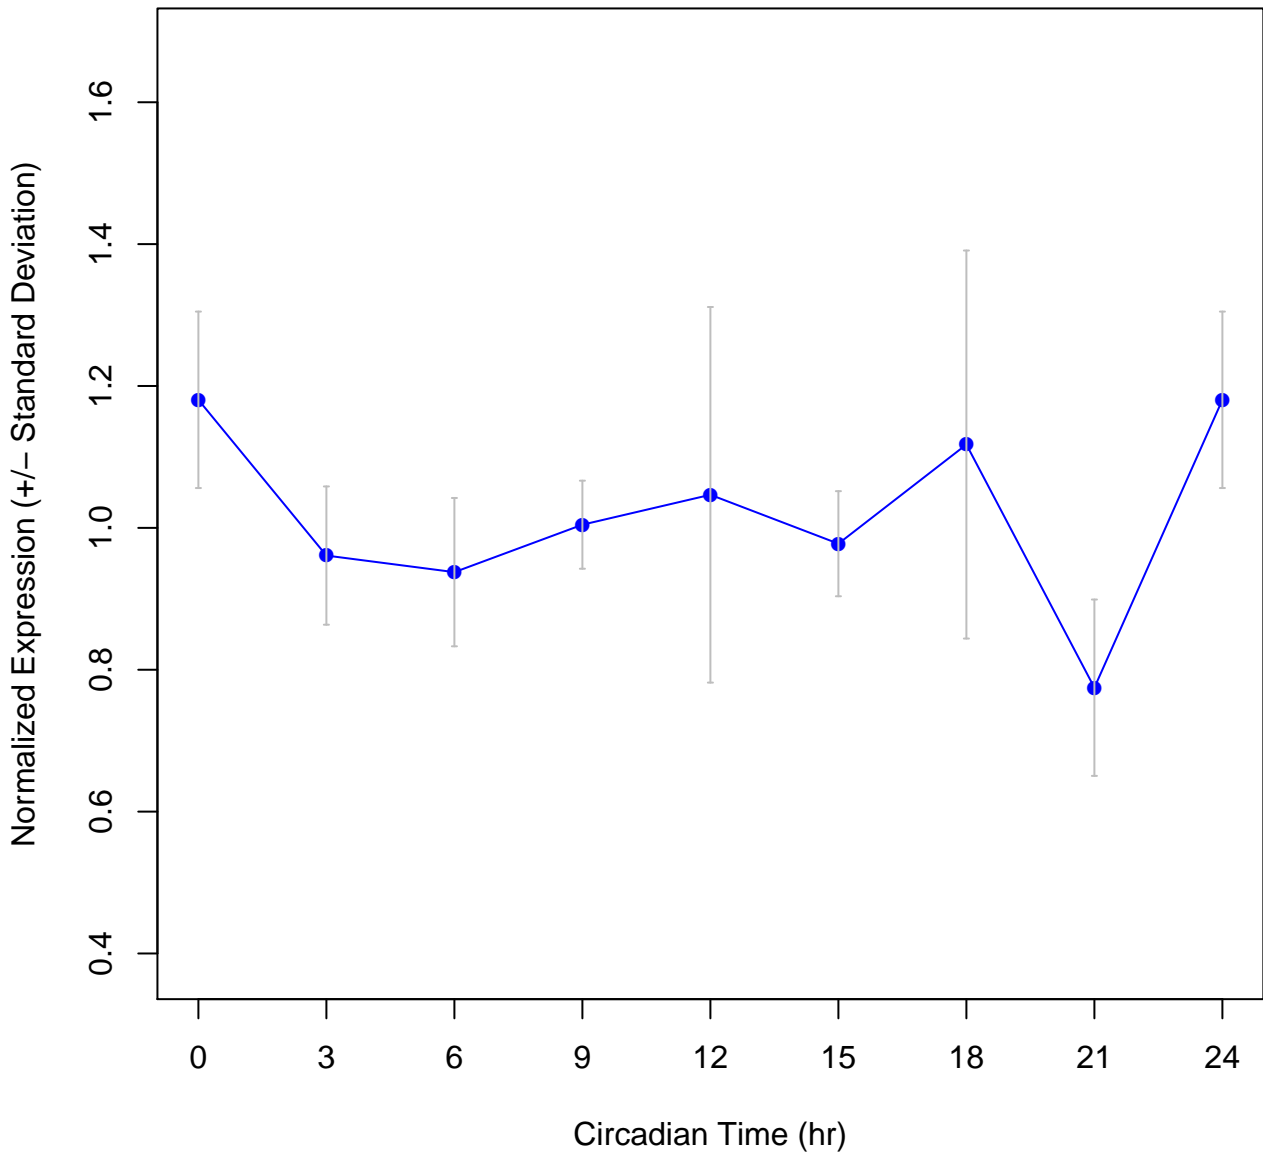

Supplement Figure 3 mtcl

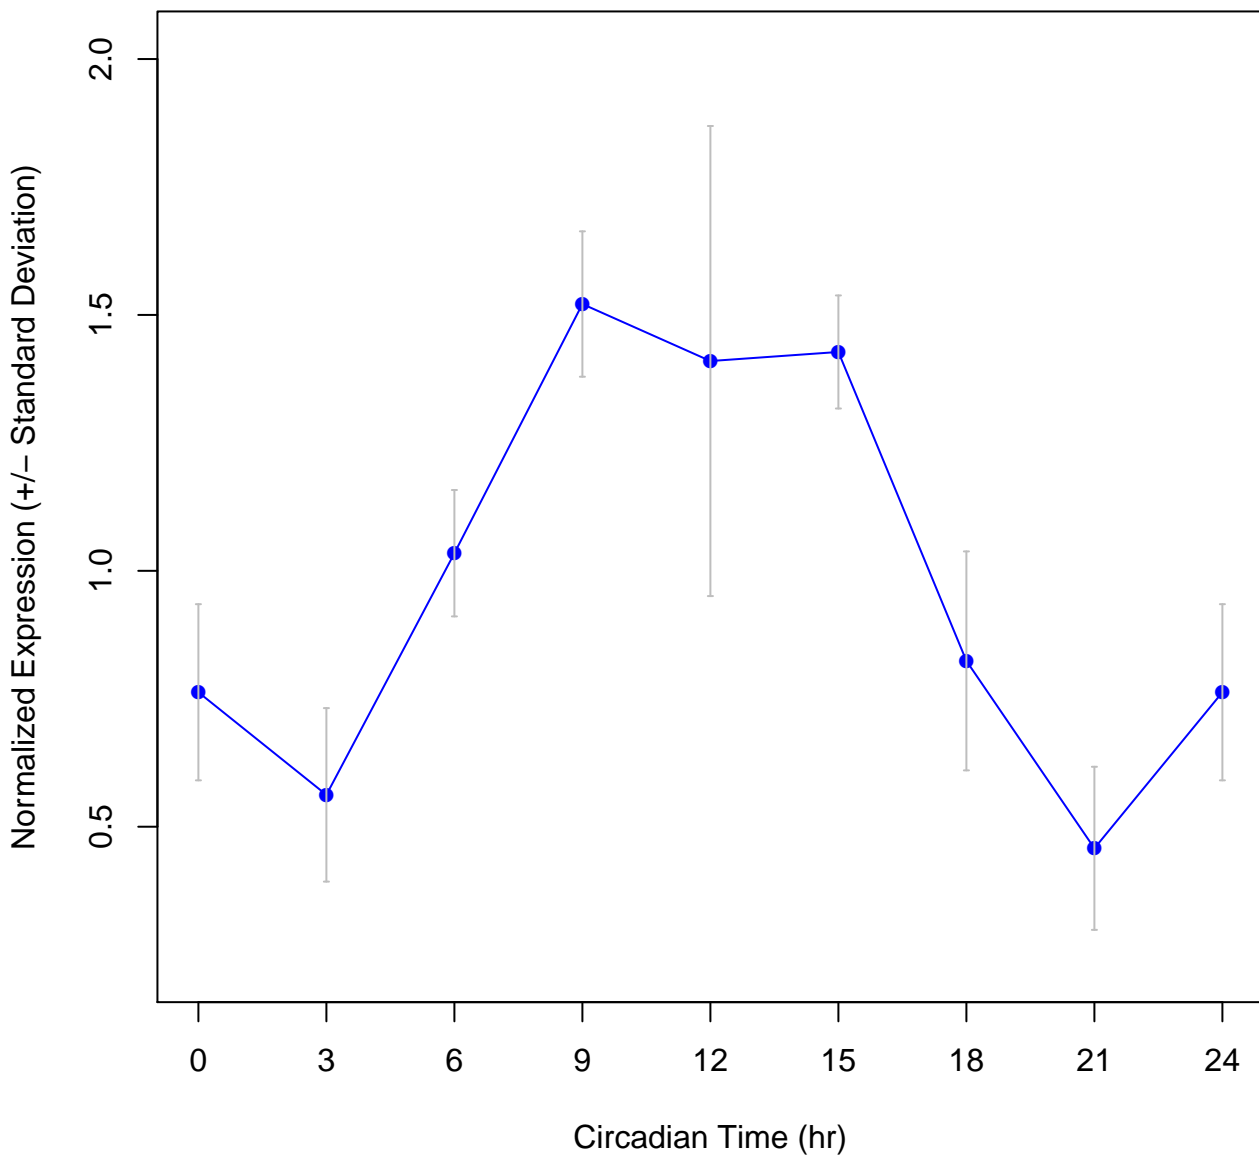

### Supplement Figure 3 mtor

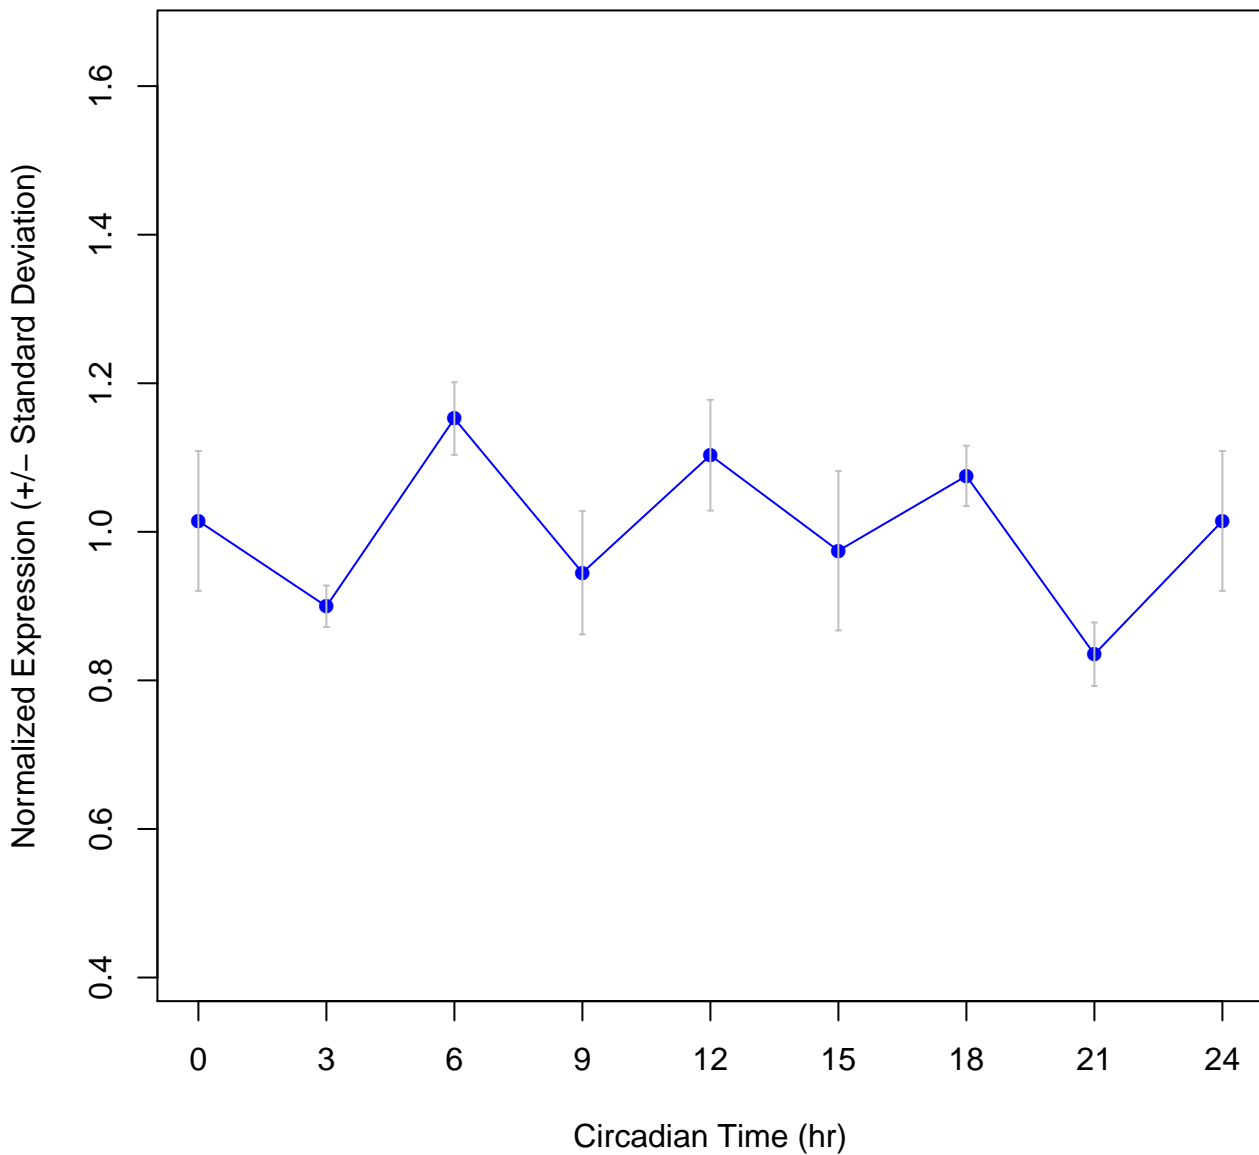



Supplement Figure 3 myh14

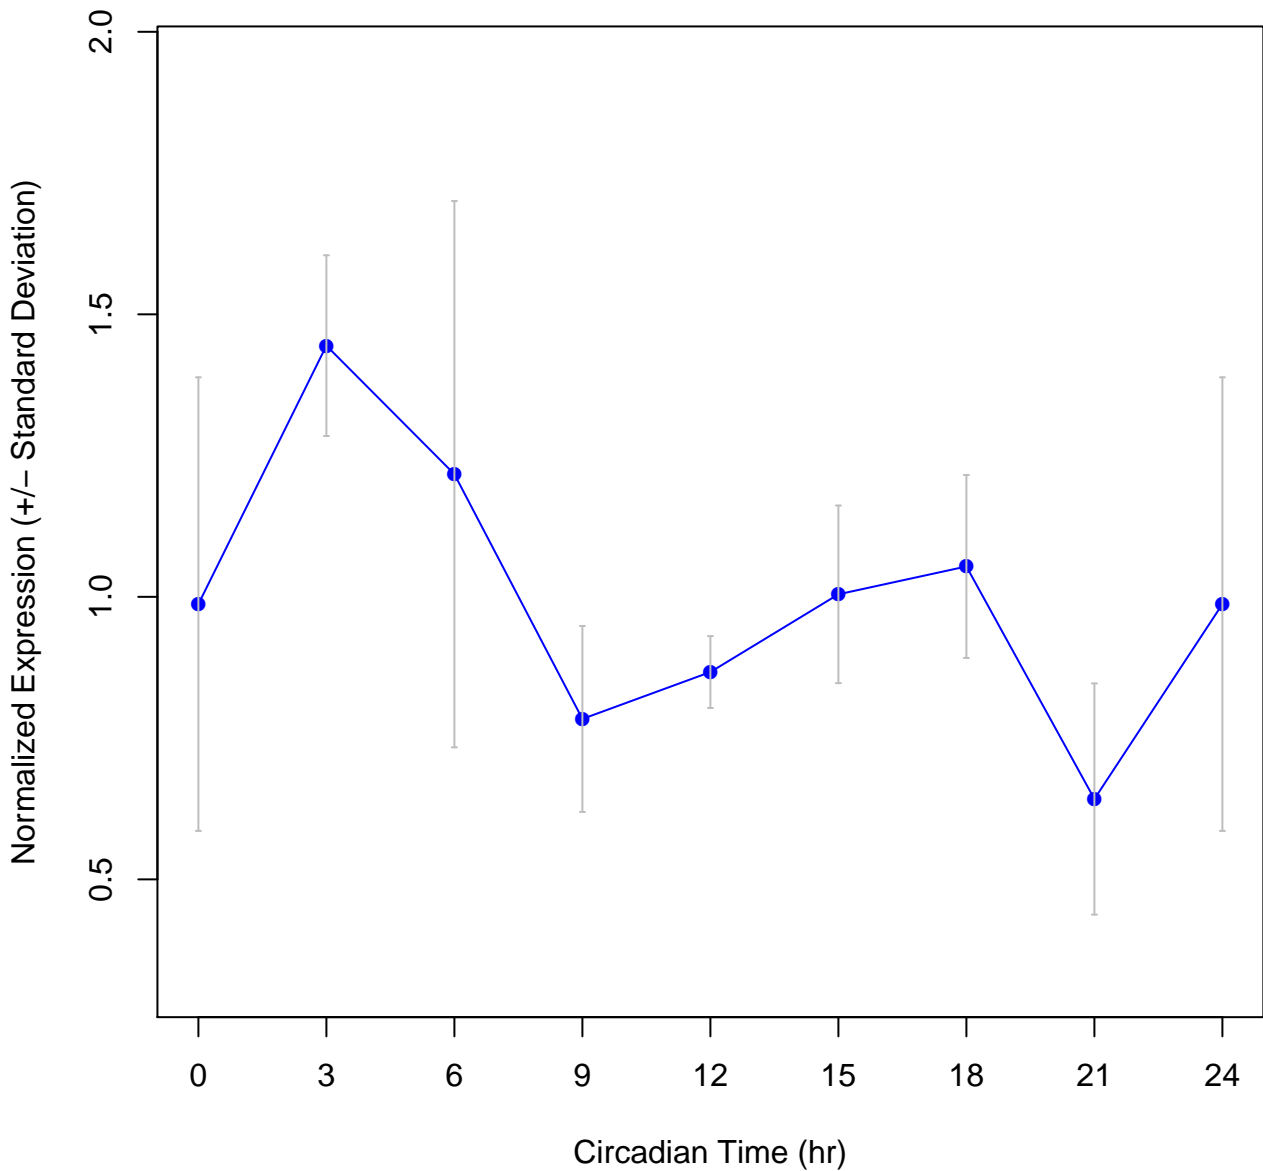

Supplement Figure 3 myl2b

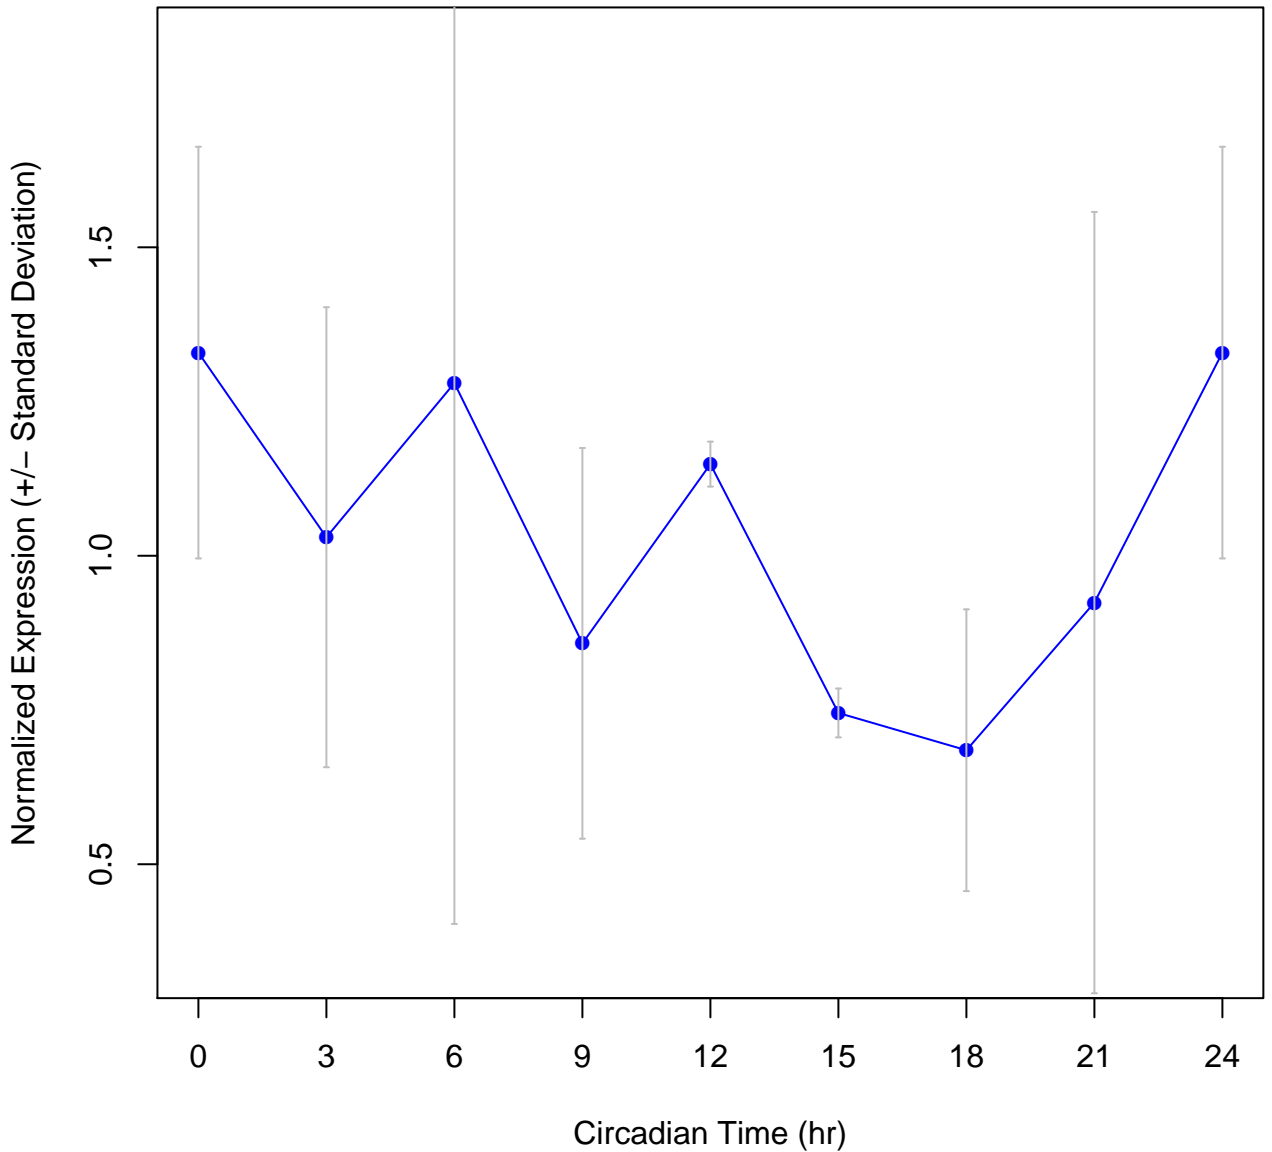

### Supplement Figure 3 nadsyn1

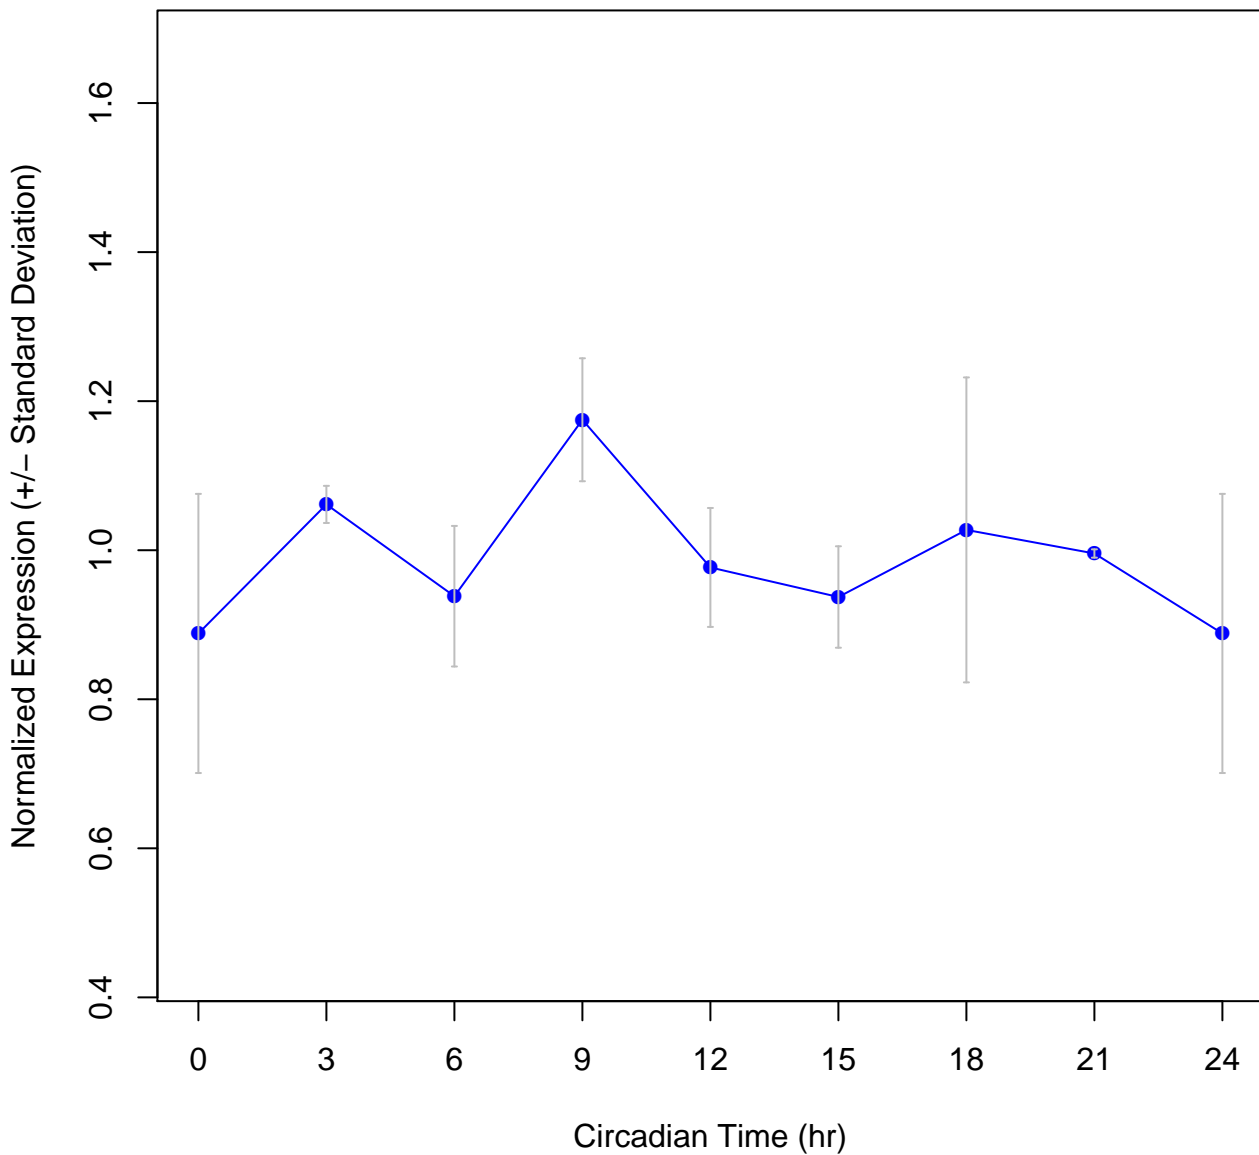

**Supplement Figure 3 ncor1**

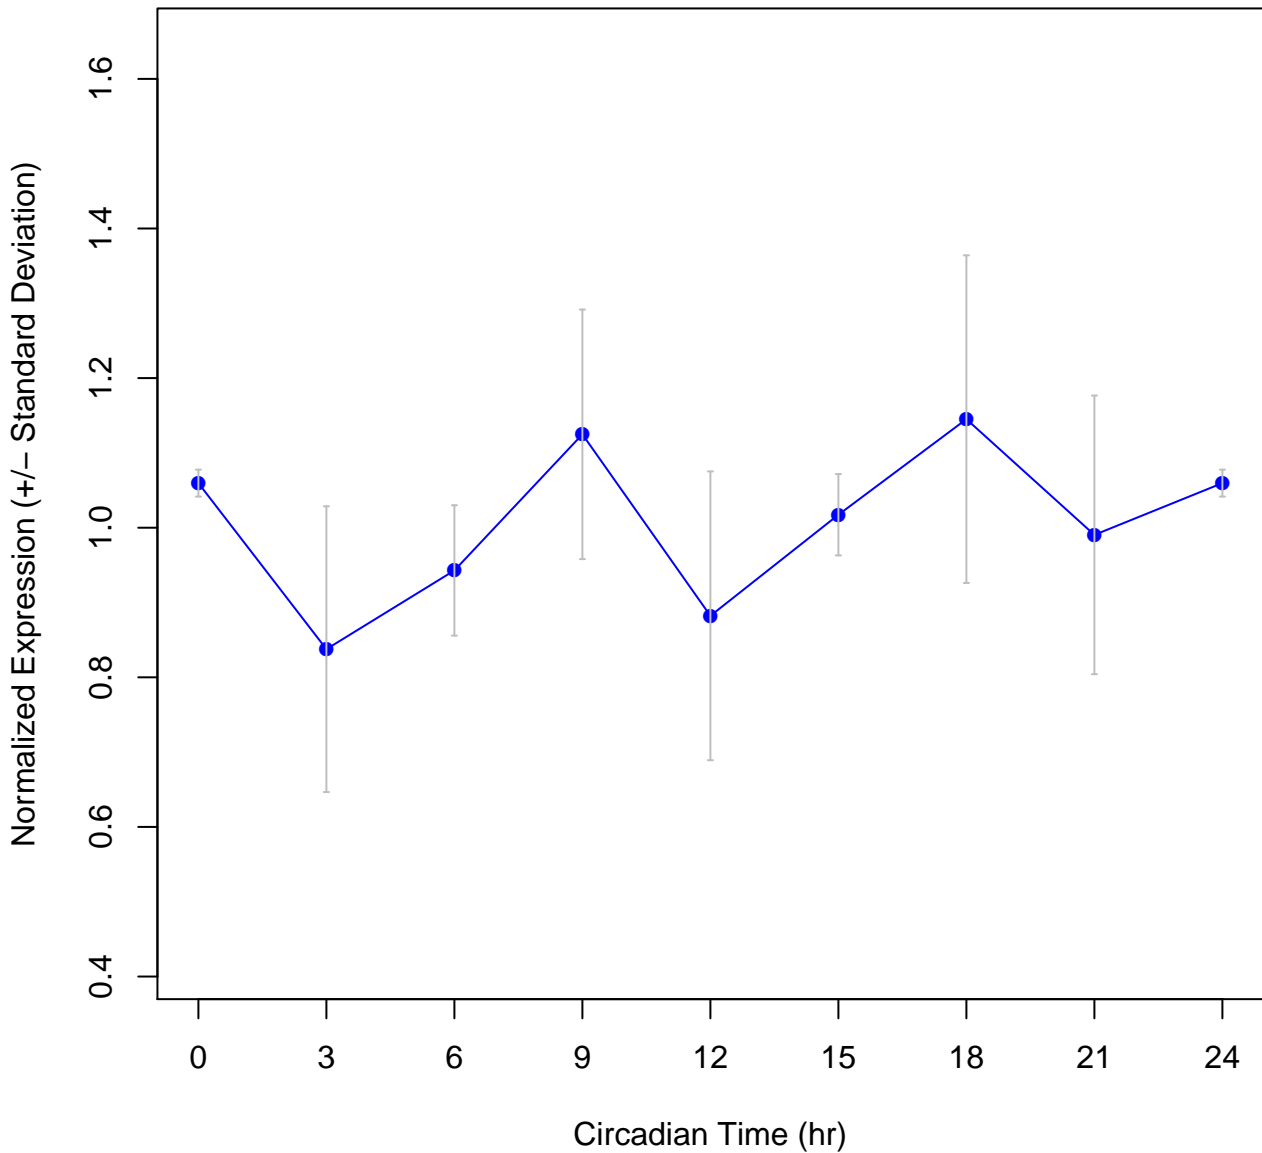

**Supplement Figure 3 ncor2**

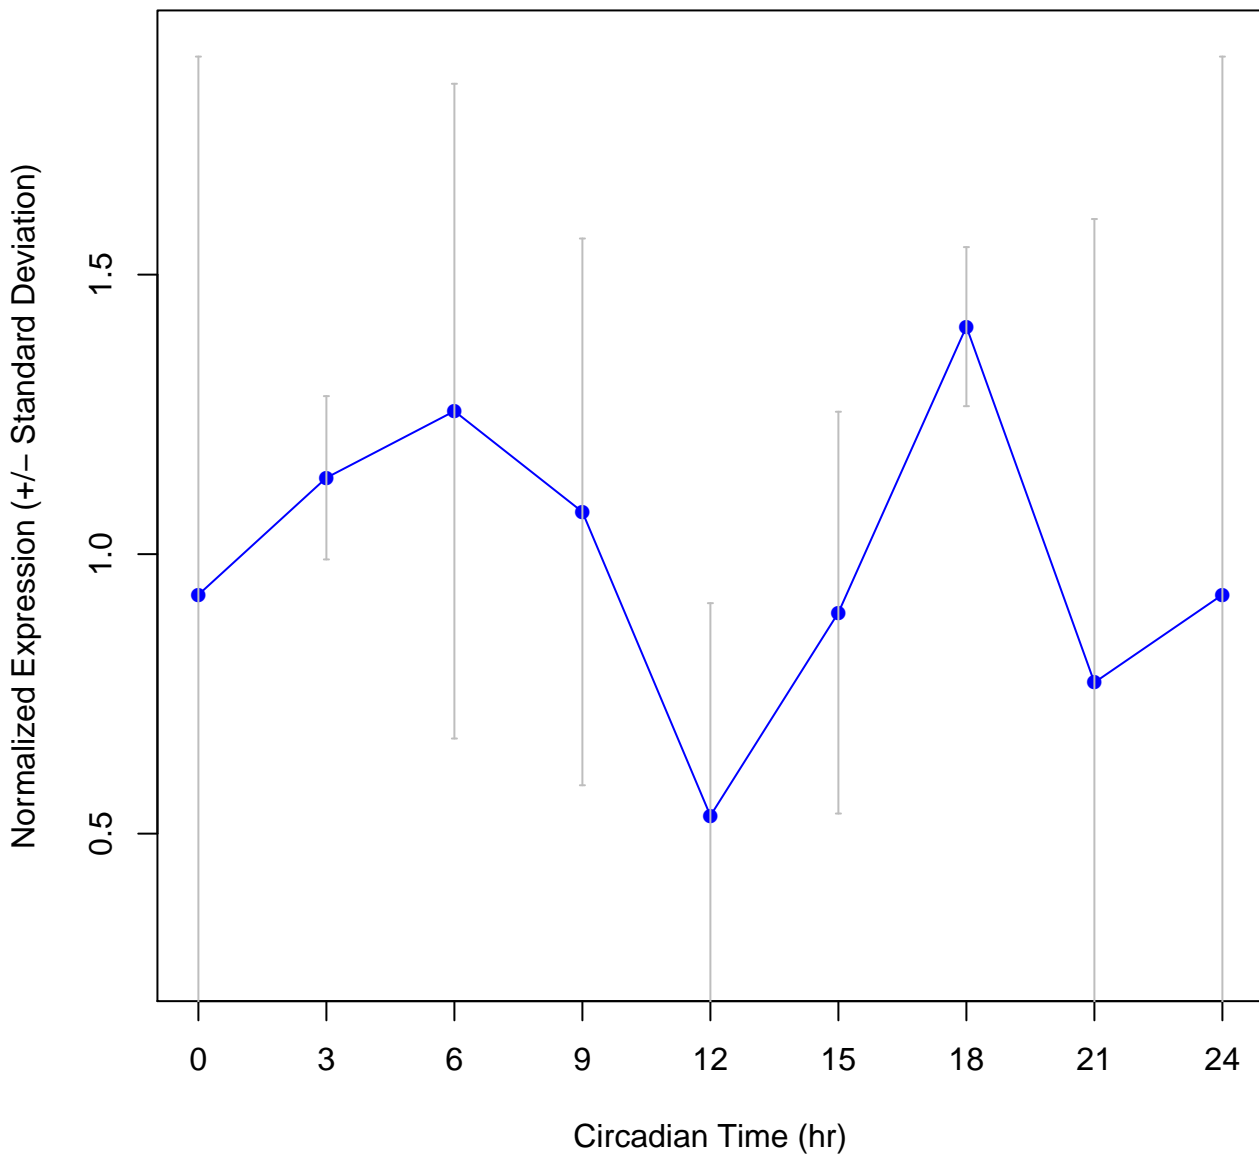

### Supplement Figure 3 nos2

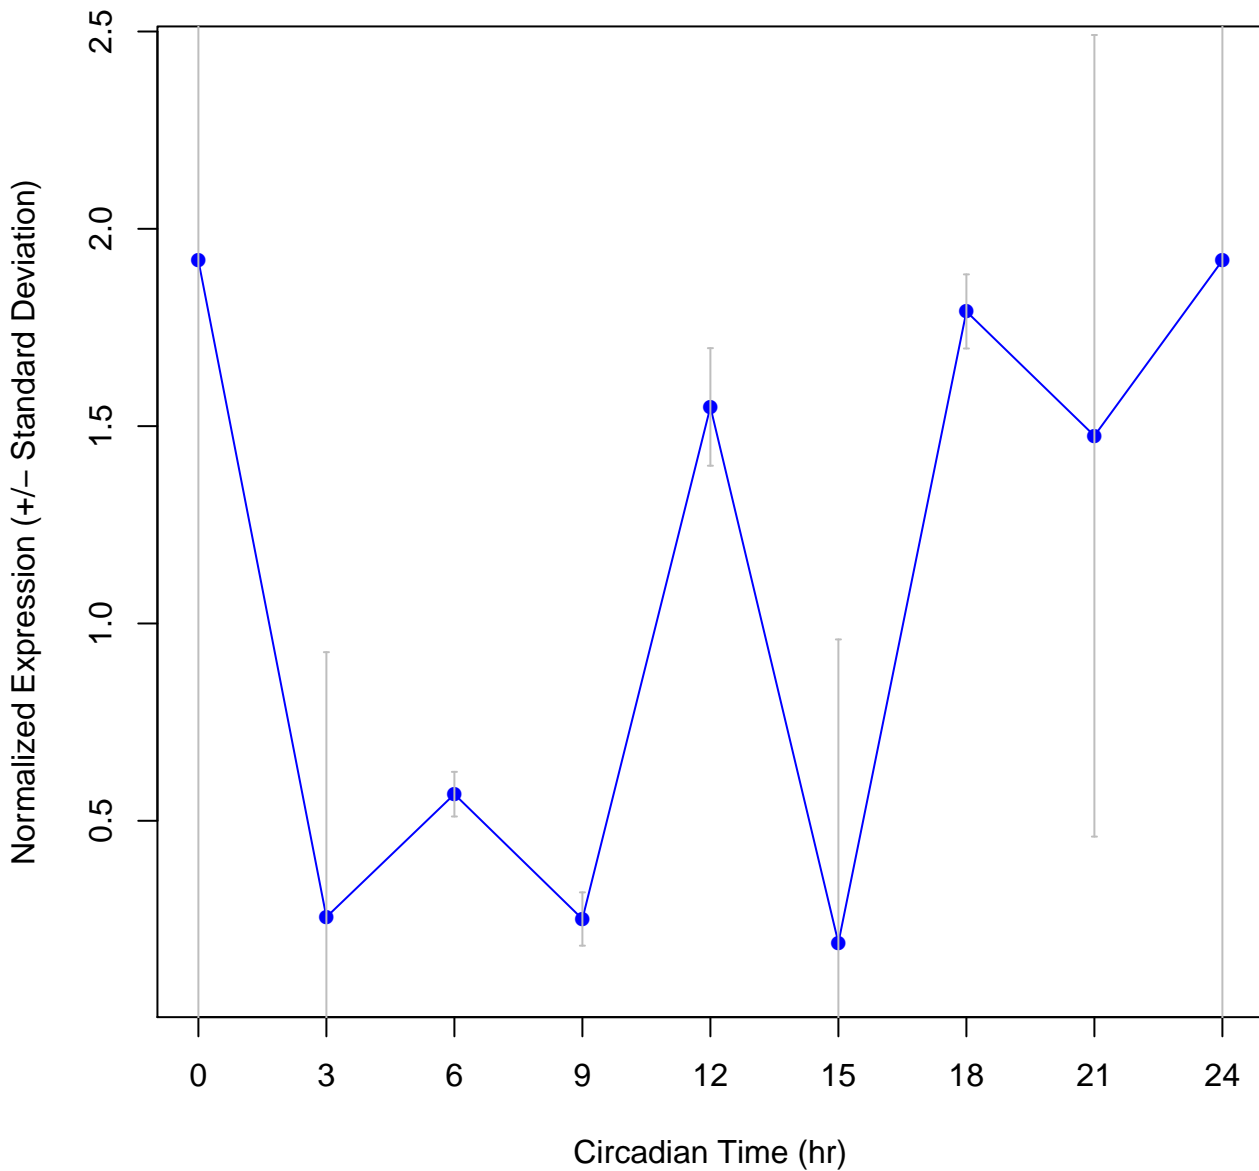

Supplement Figure 3 nr1d1

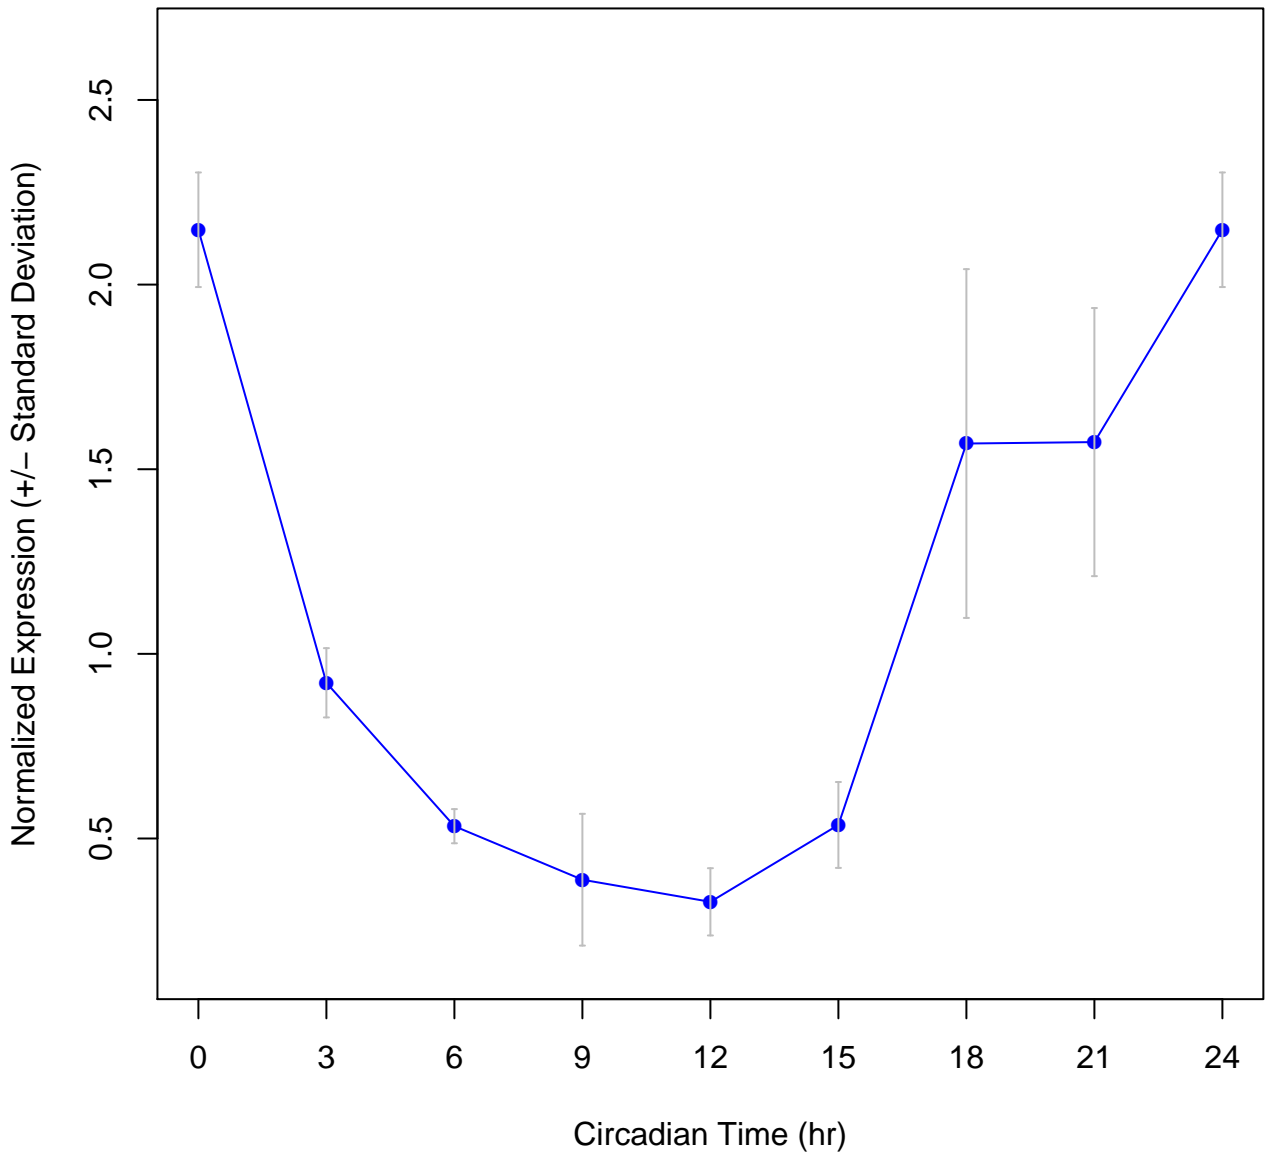

**Supplement Figure 3 nr1d2**

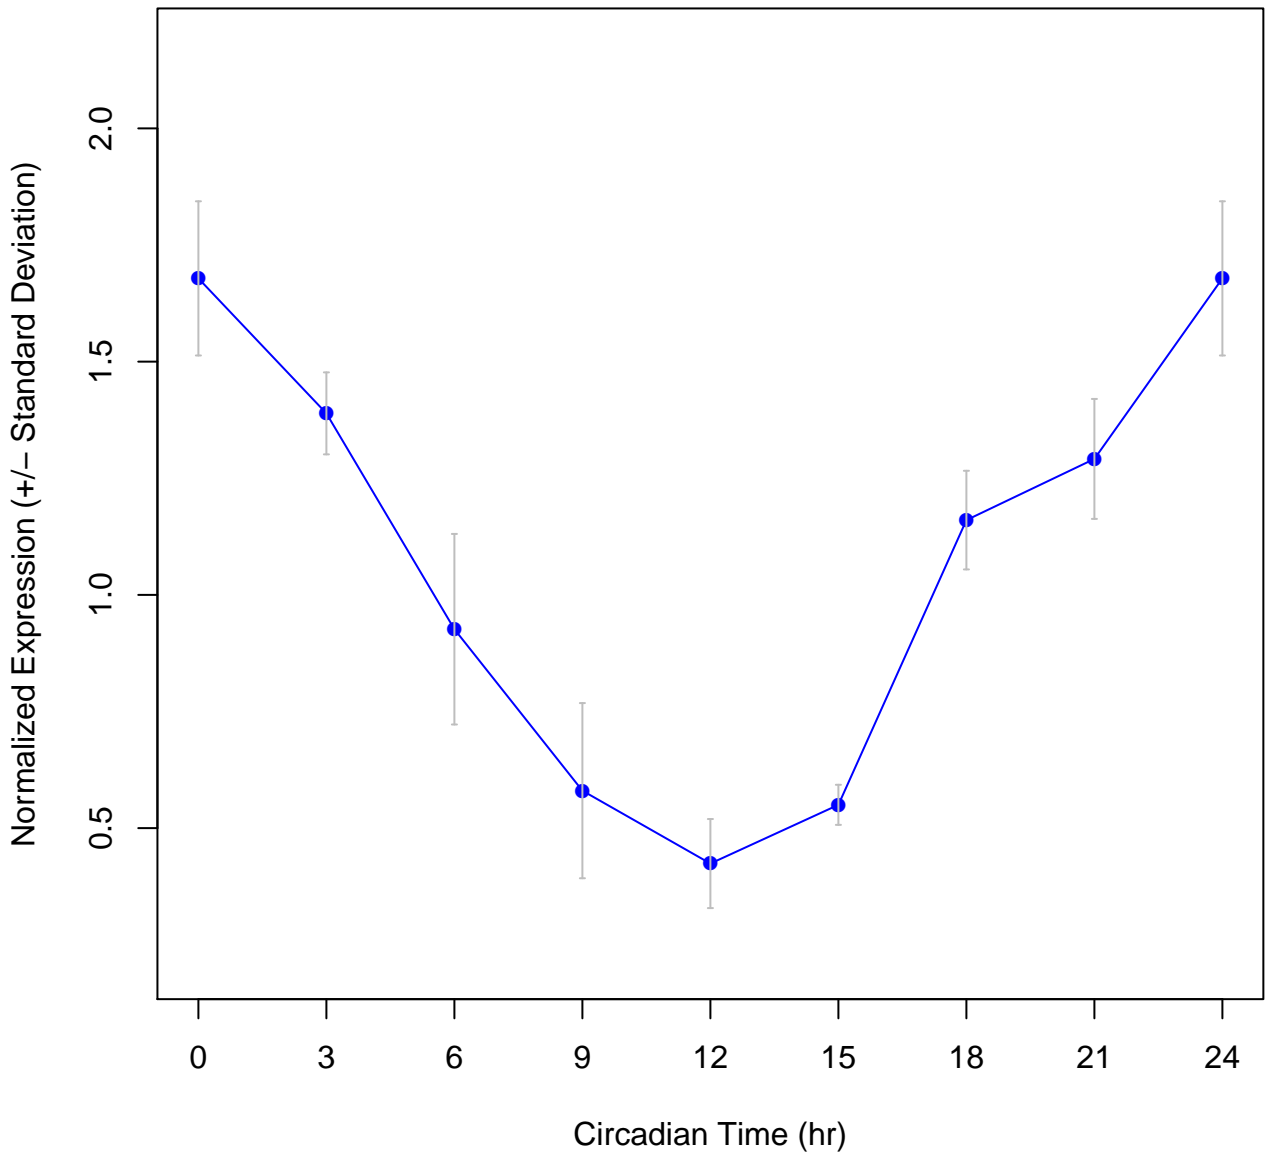



**Supplement Figure 3 nr1d4**

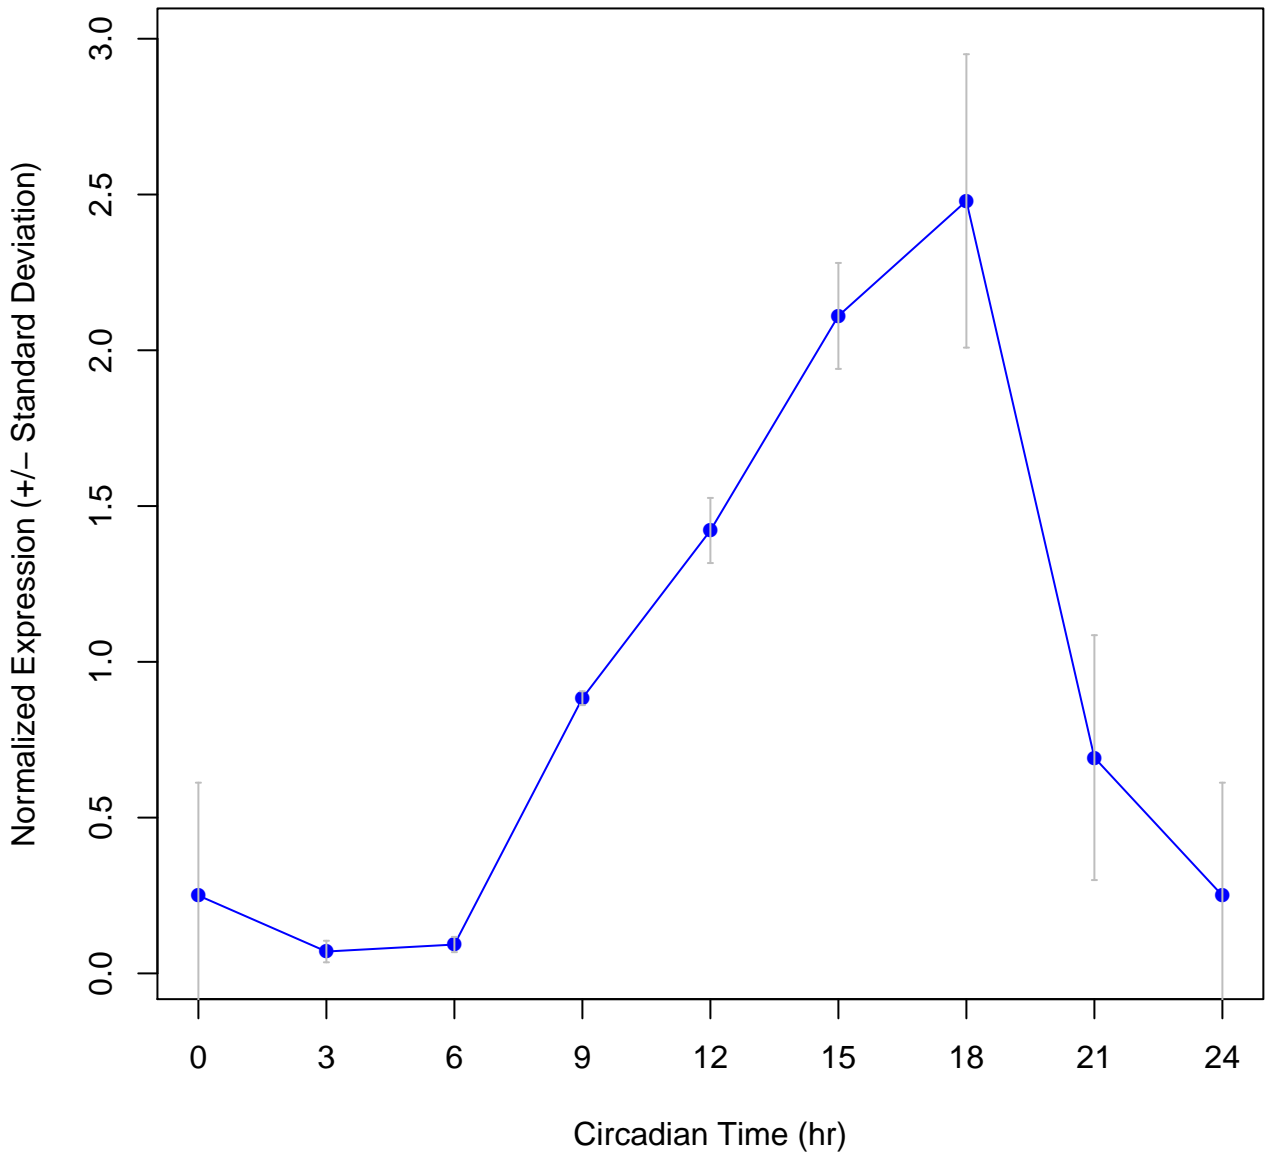

Supplement Figure 3 numa1

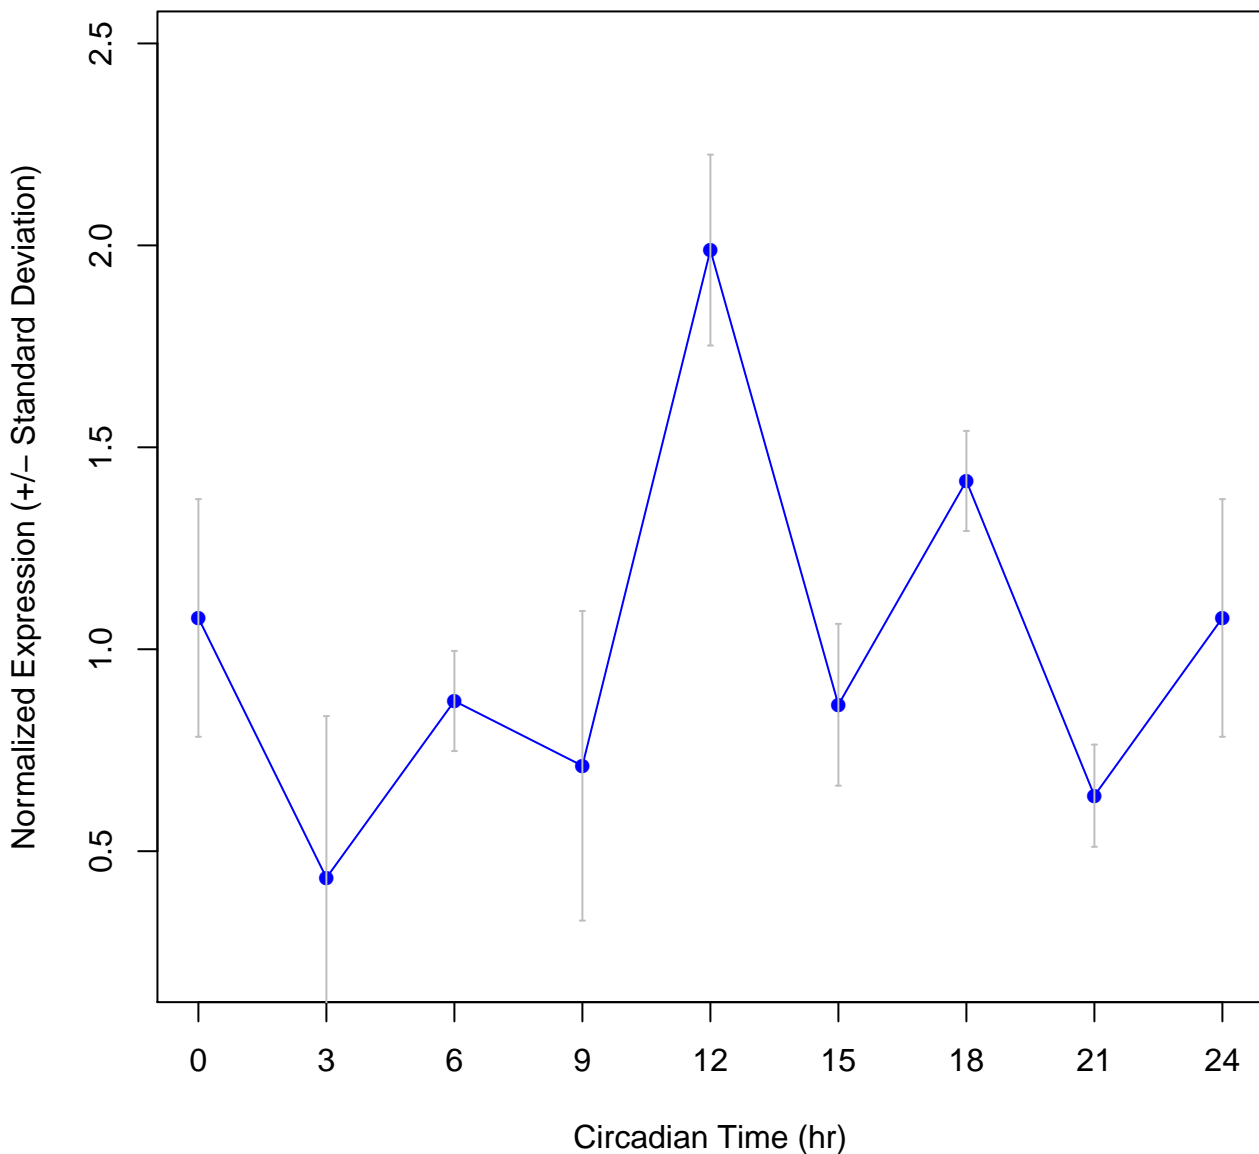

Supplement Figure 3 opn1sw

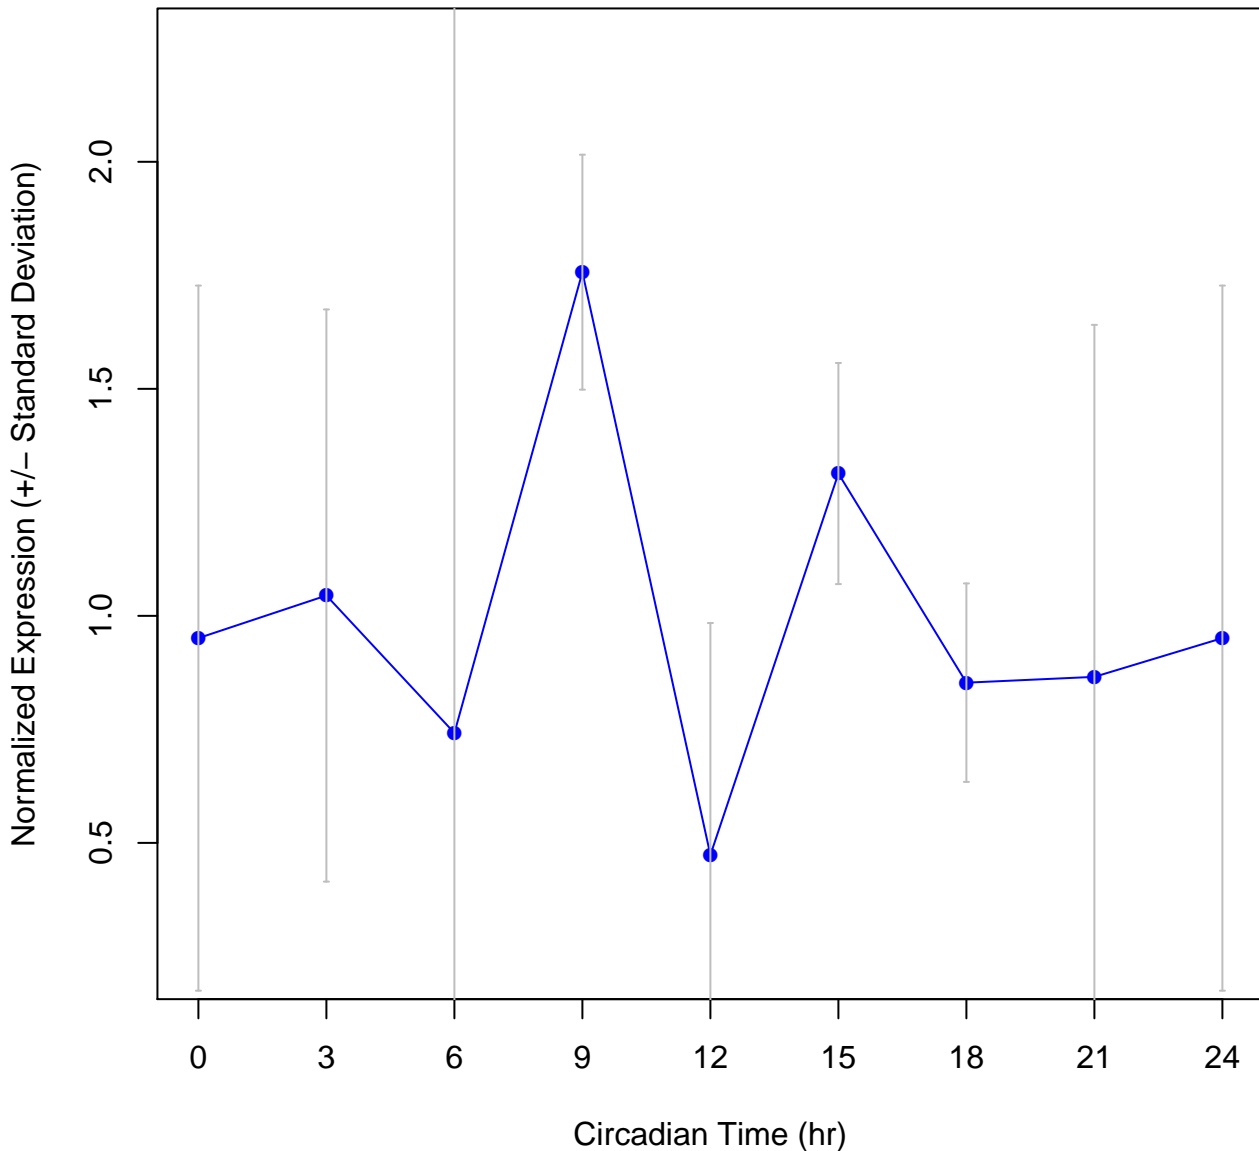

Supplement Figure 3 pacap

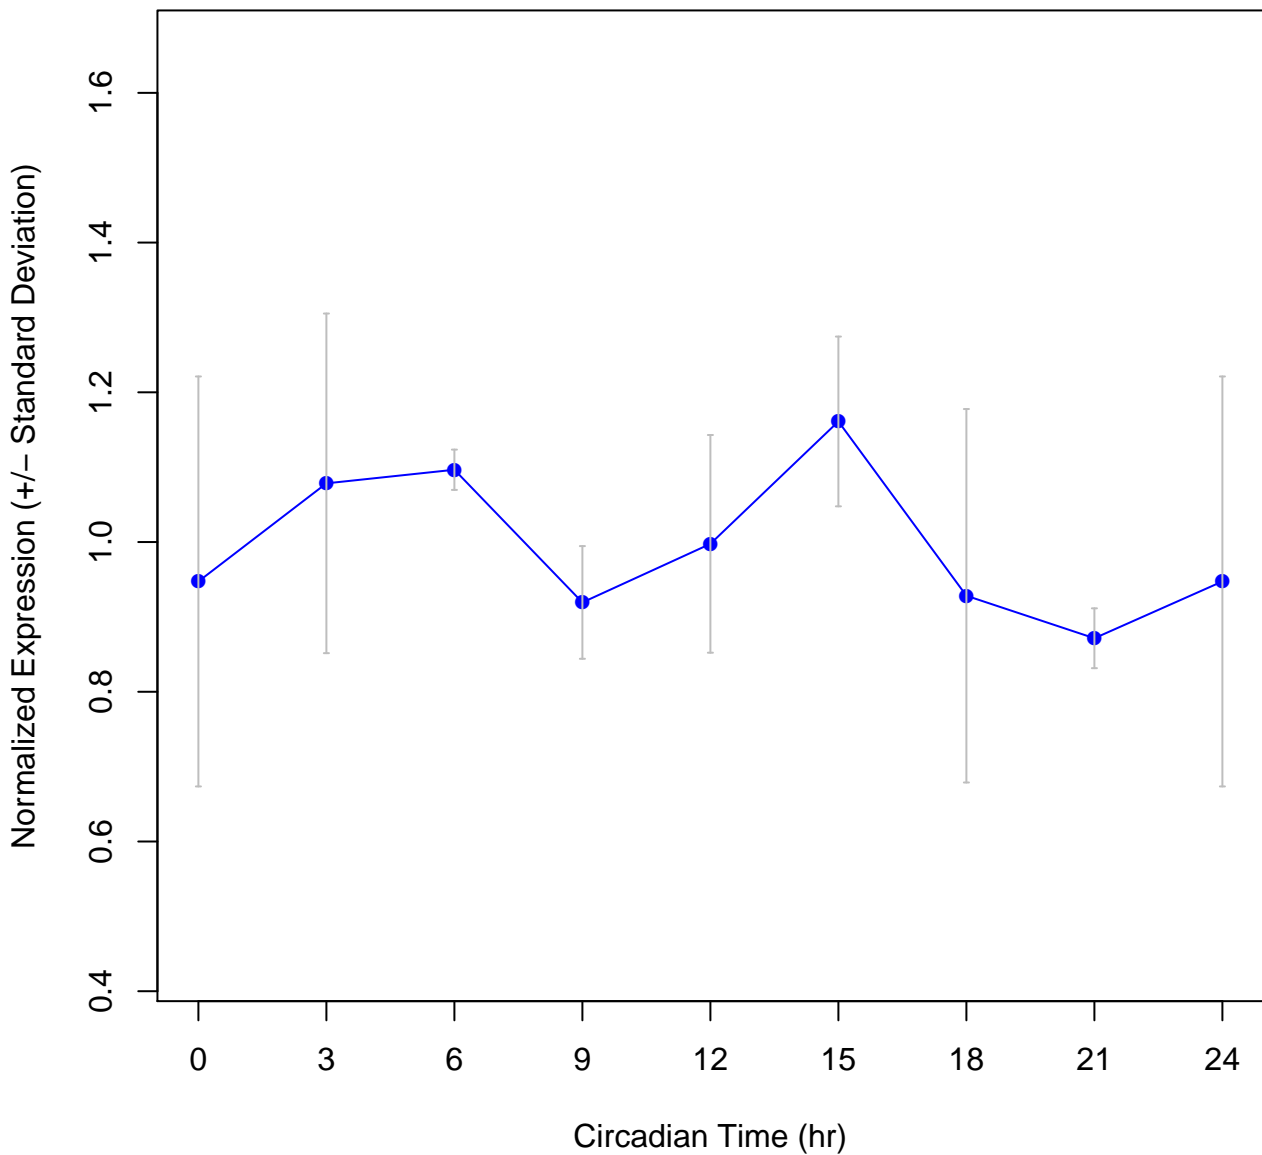

Supplement Figure 3 parpbp

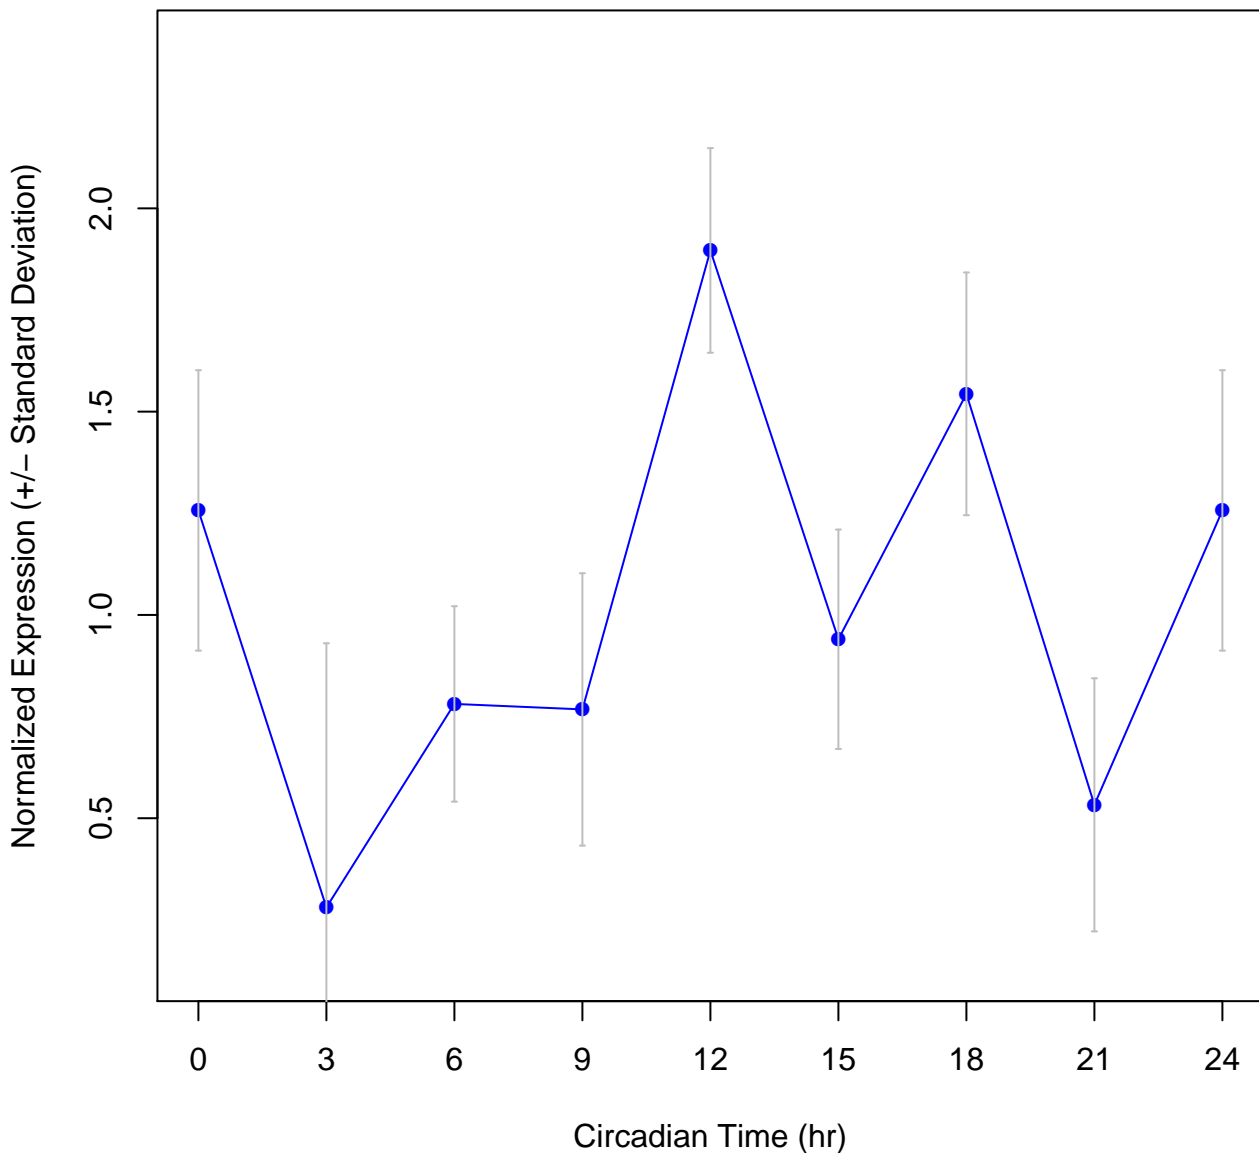

**Supplement Figure 3 pcna**

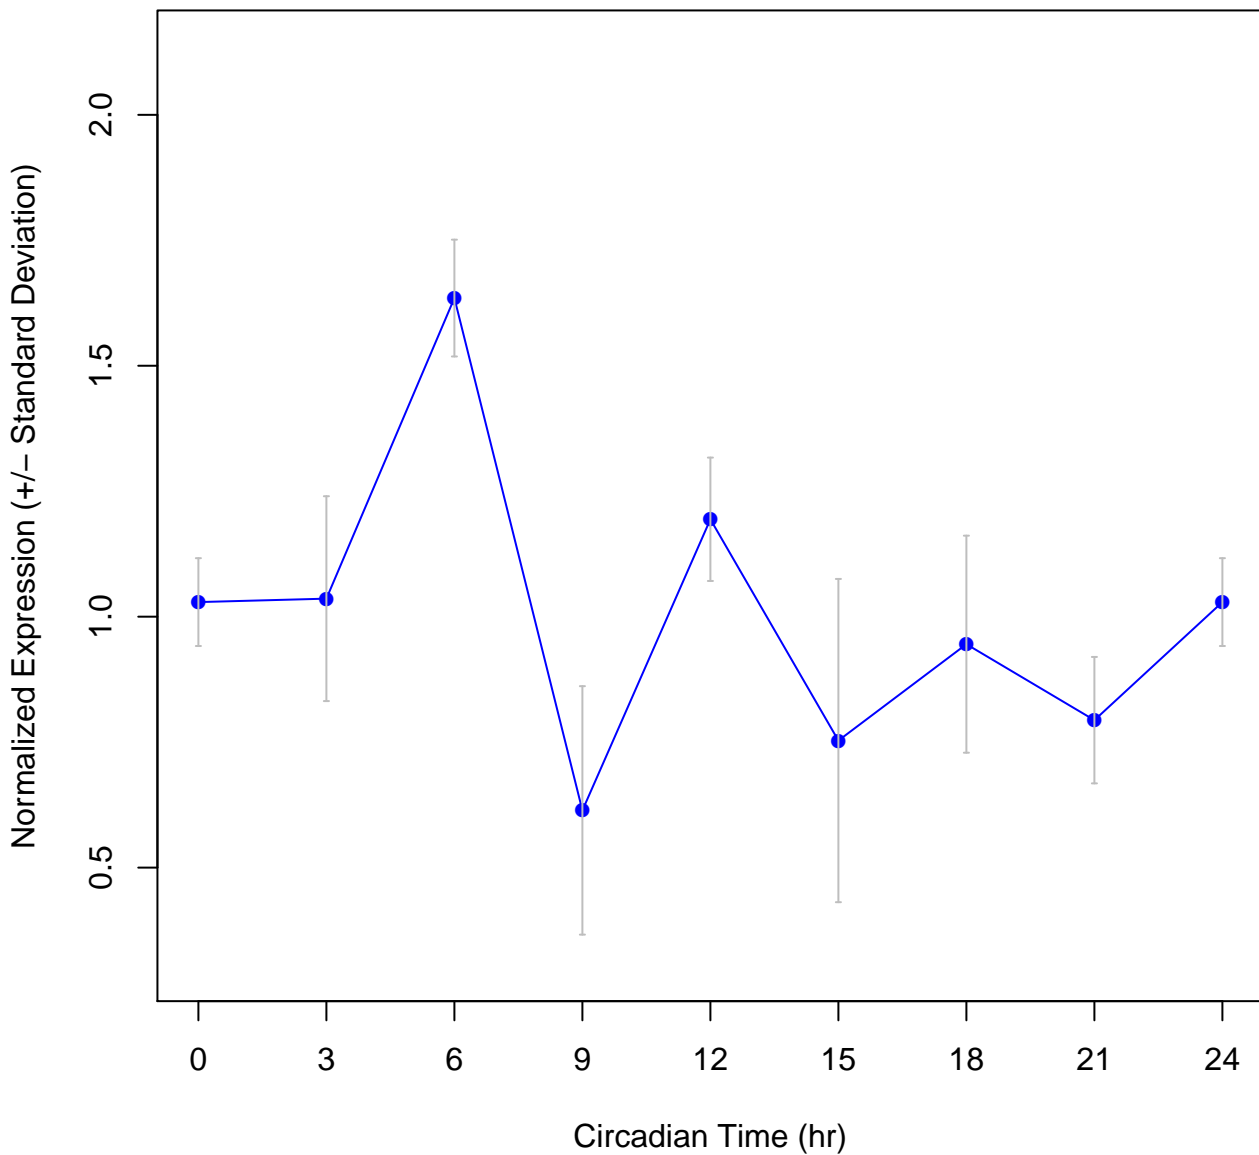

Supplement Figure 3 pcp4

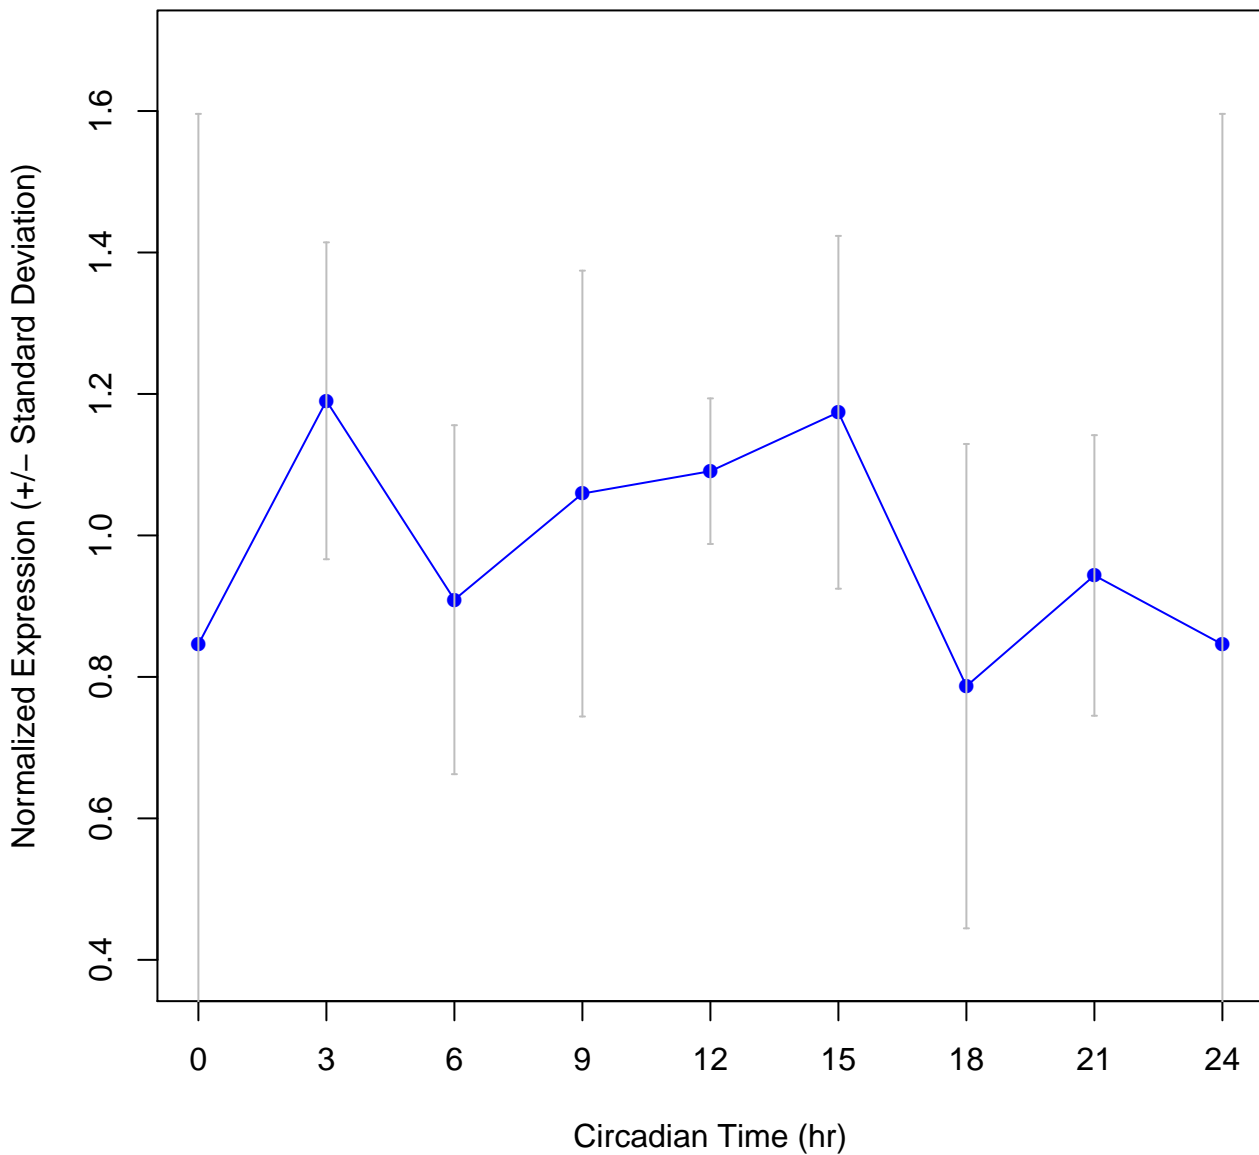

Supplement Figure 3 pdgfc

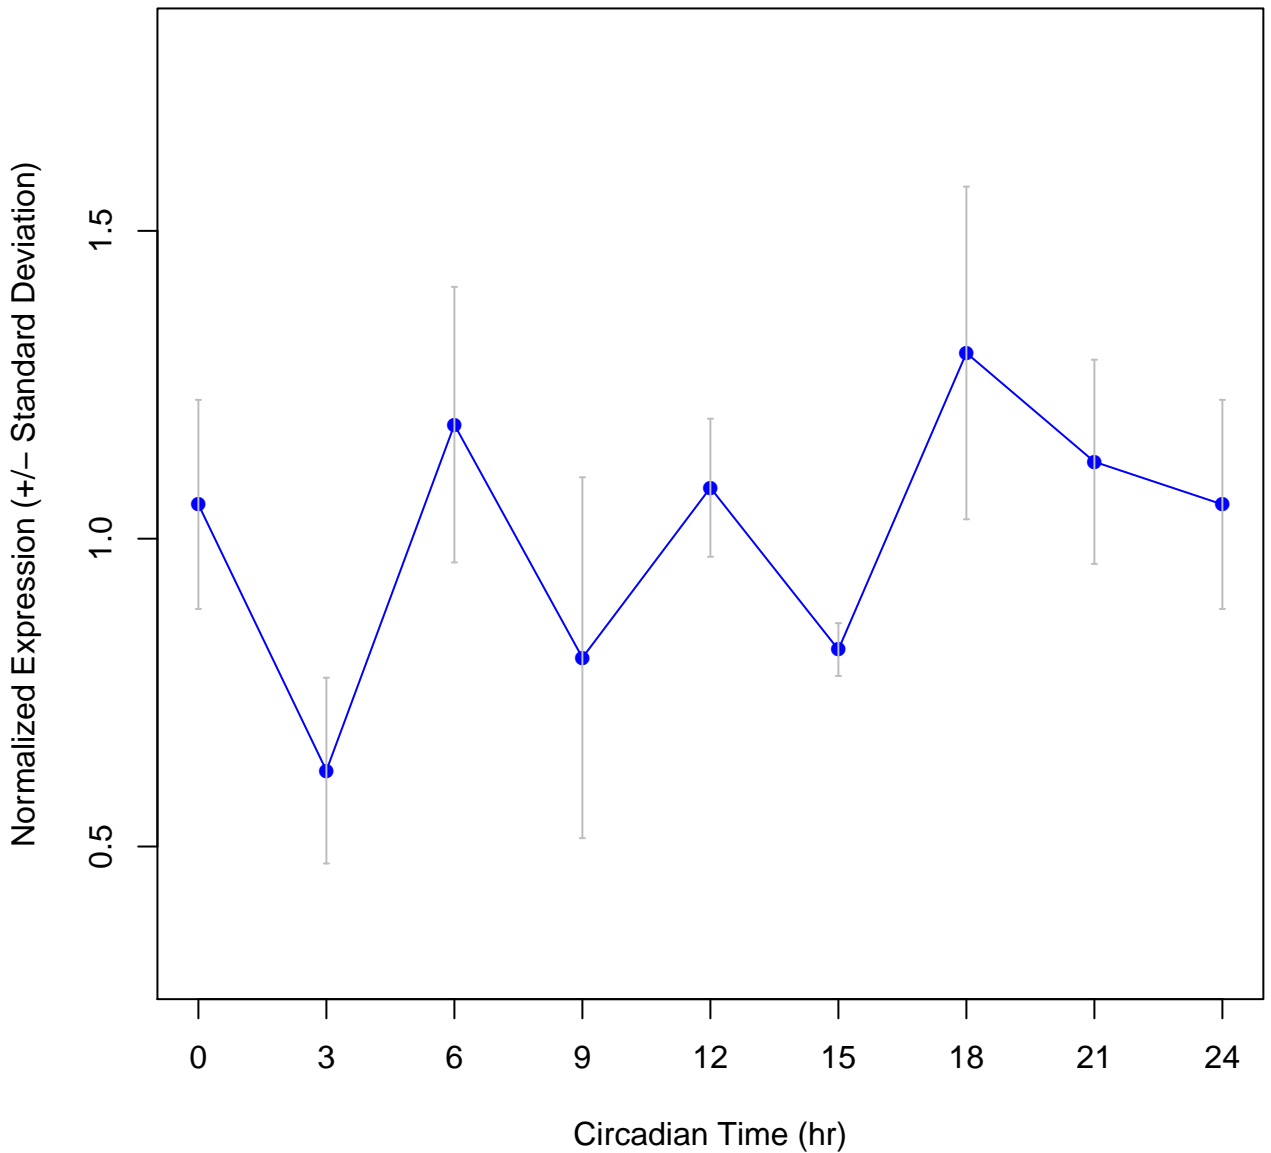



### Supplement Figure 3 per1

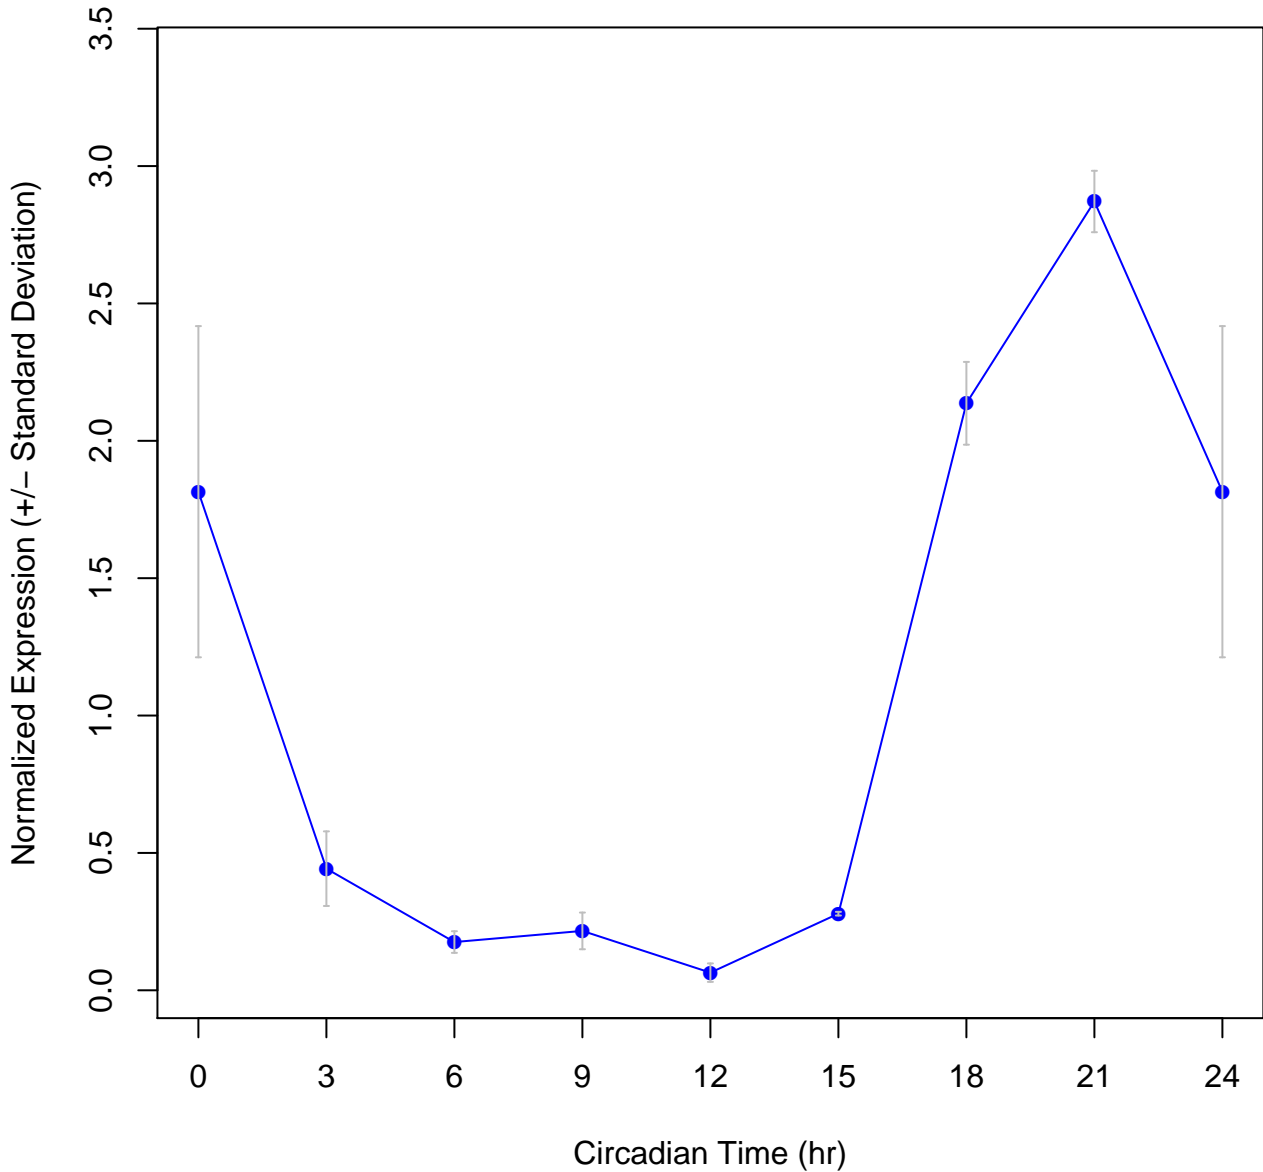

### Supplement Figure 3 per2

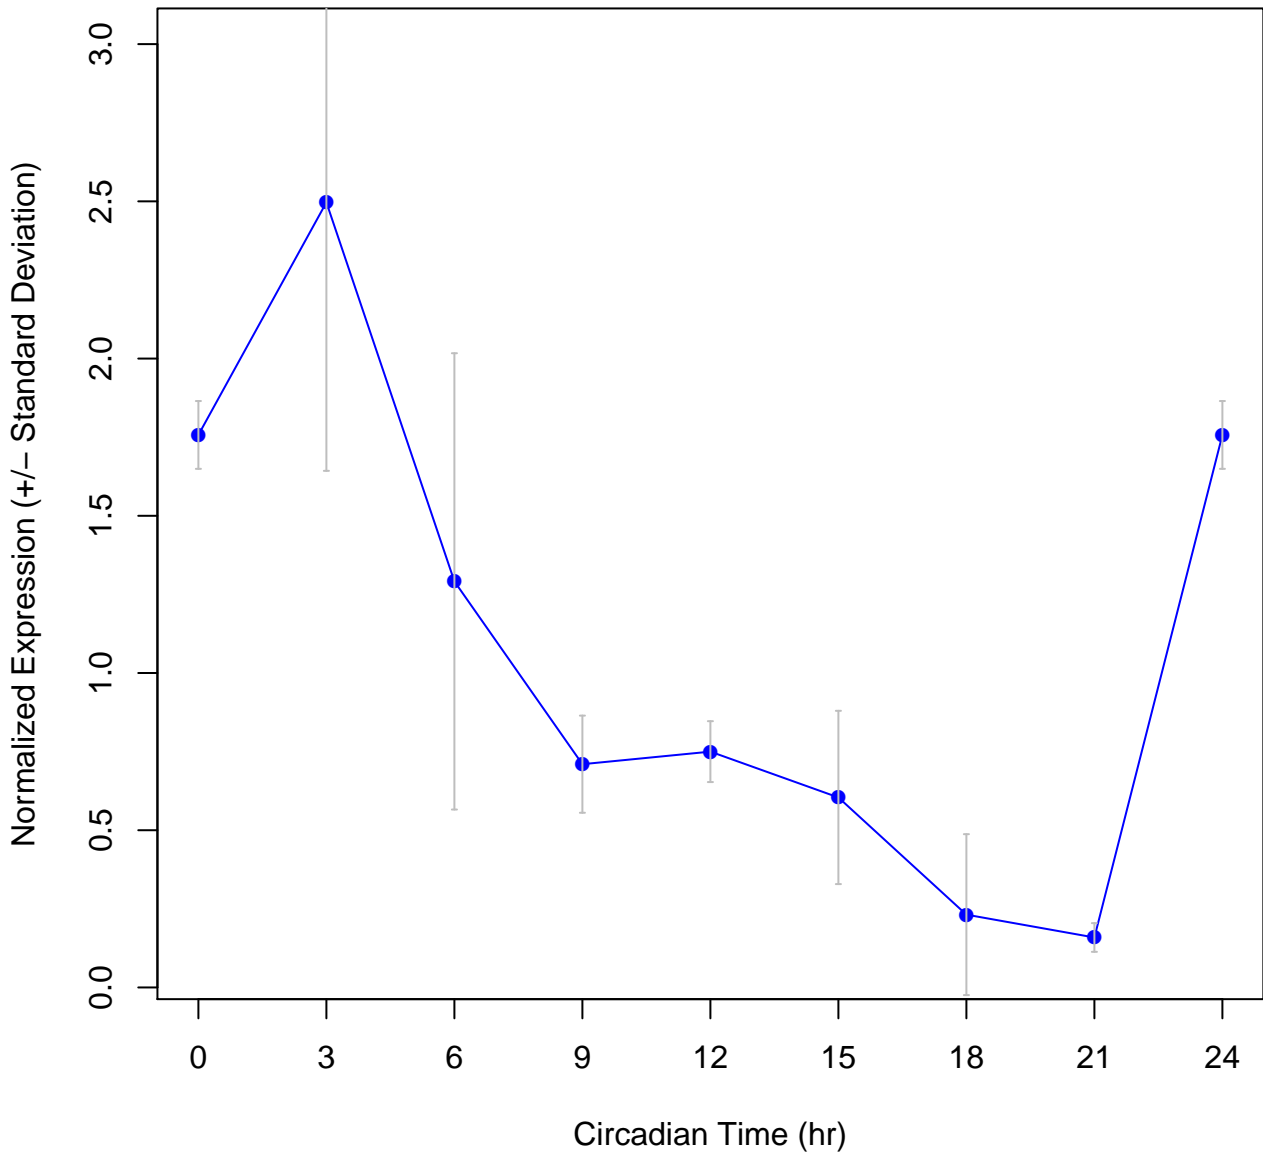

### Supplement Figure 3 pfkfb1

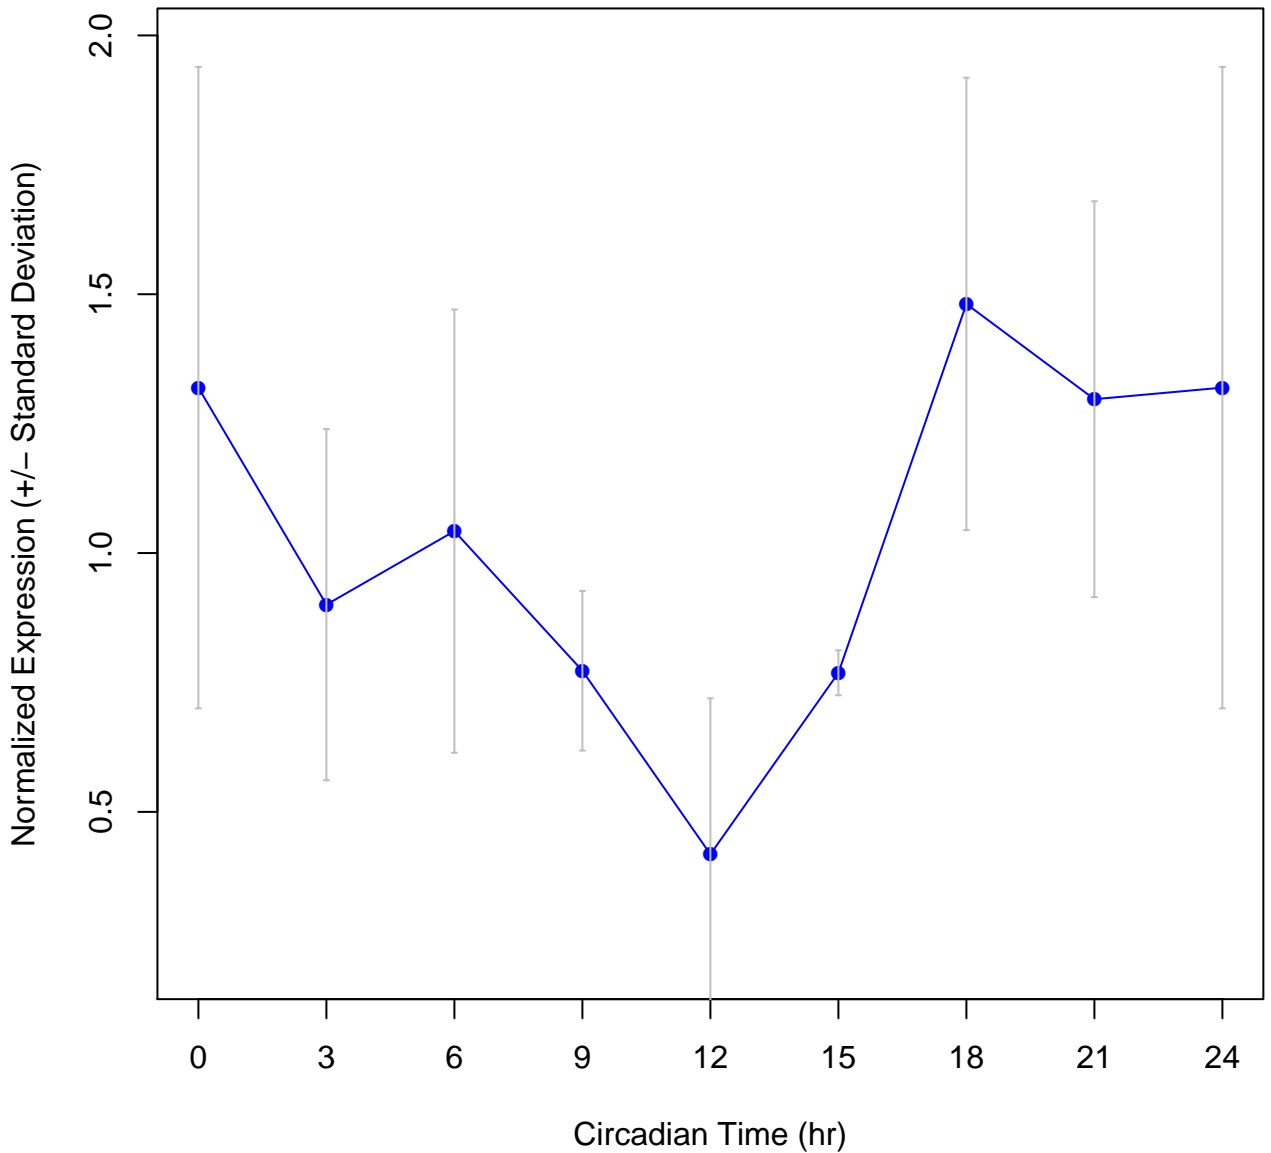

**Supplement Figure 3 pif1**

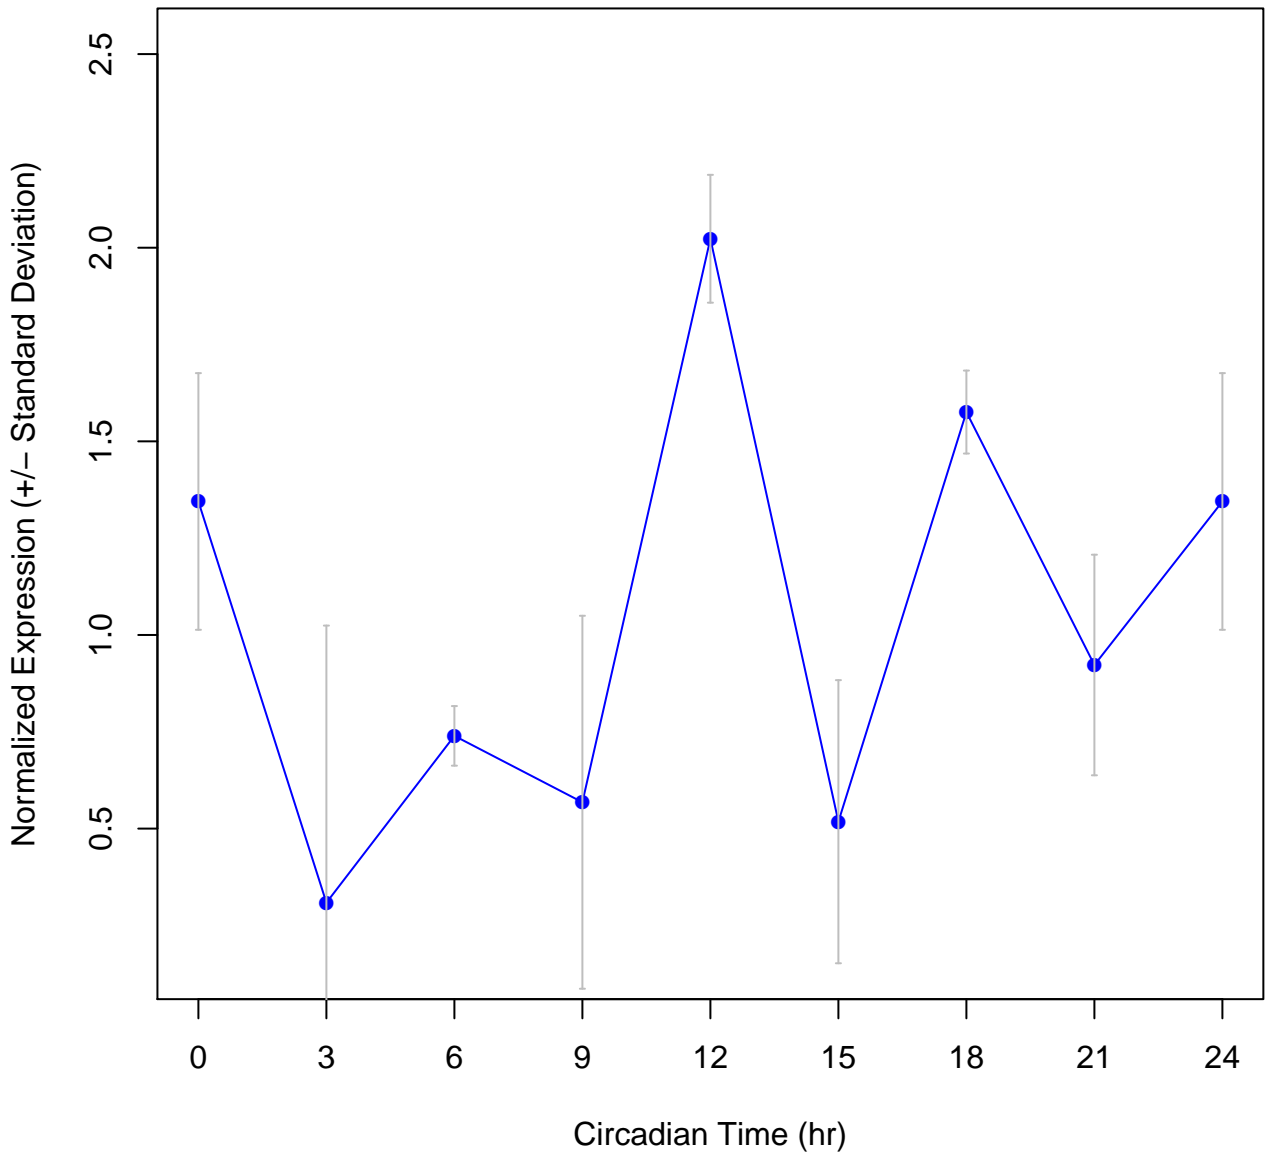

Supplement Figure 3 pik3c2b

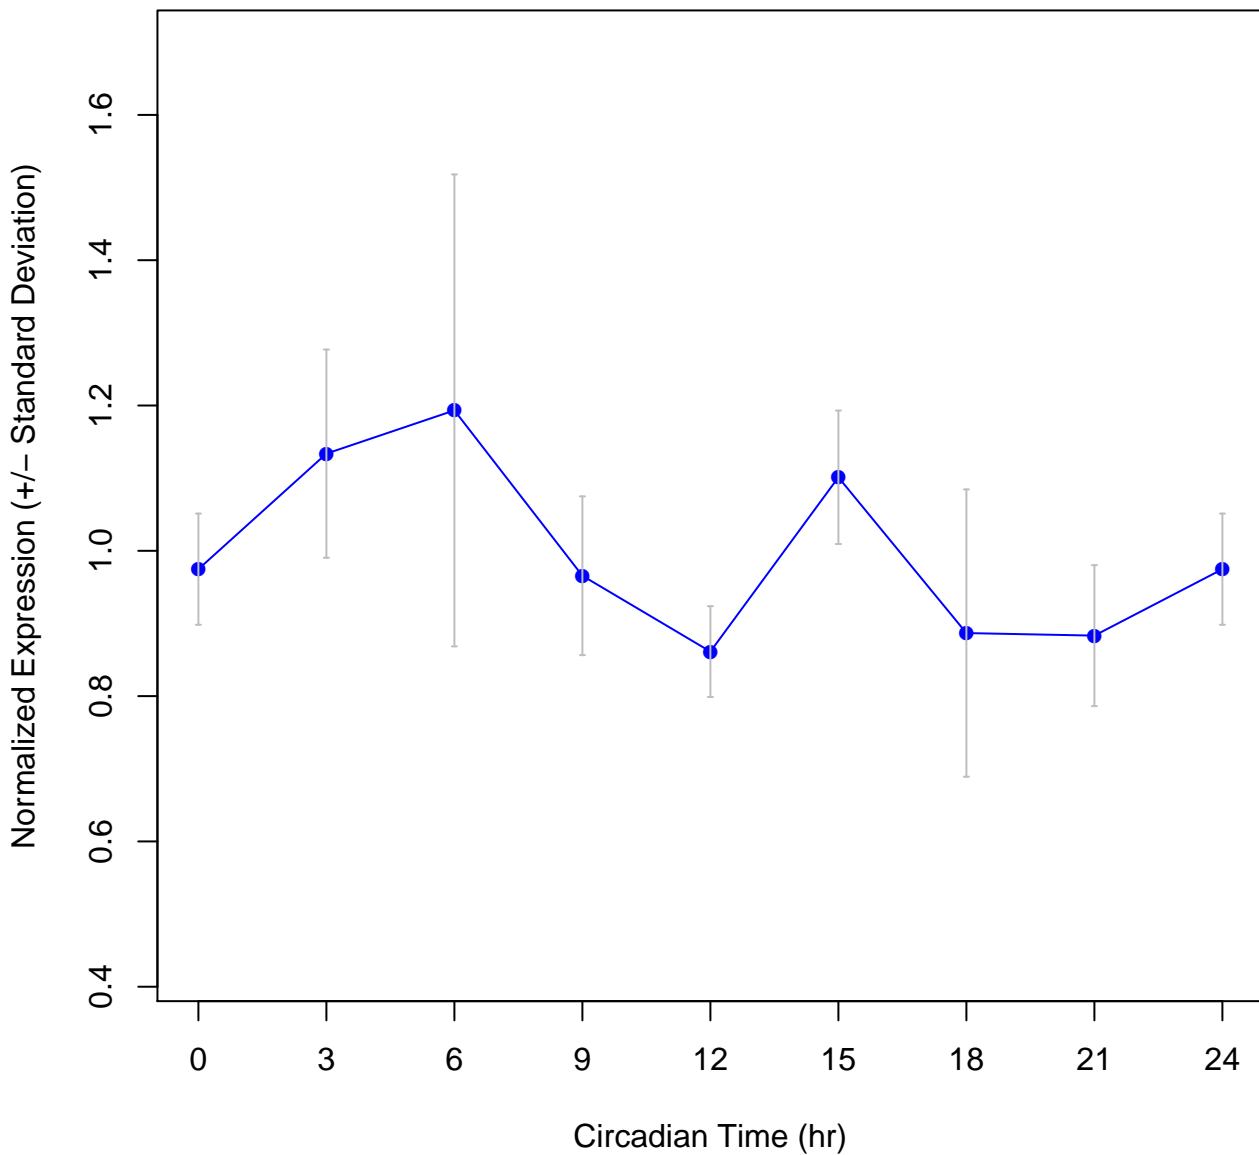

**Supplement Figure 3 pkmyt1**

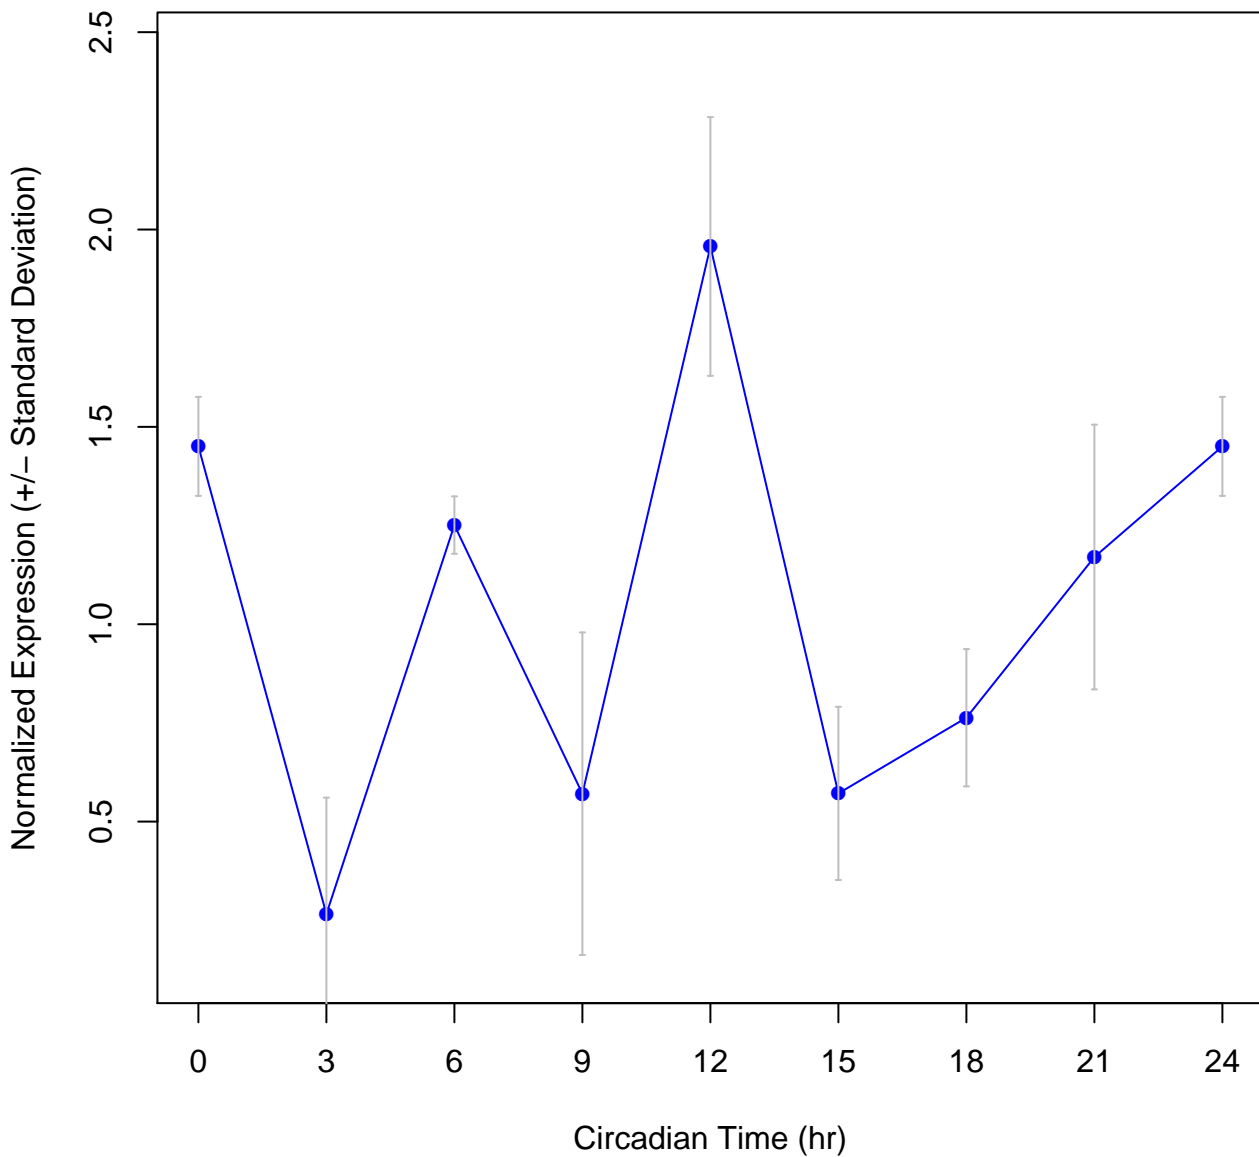

Supplement Figure 3 plcb1

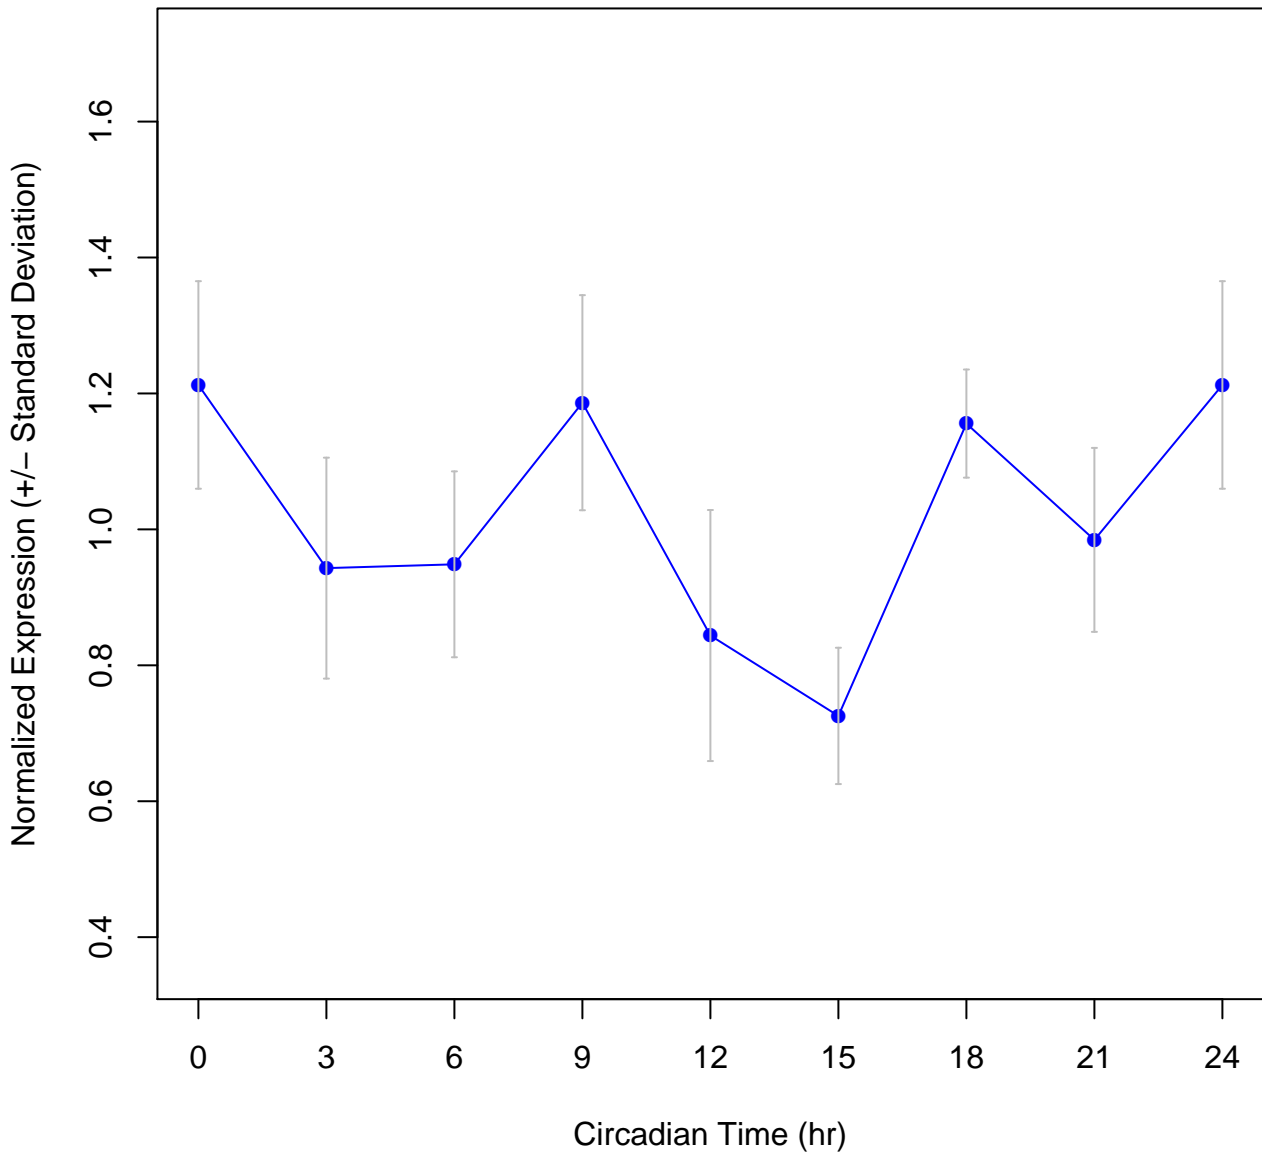

Supplement Figure 3 plcd1

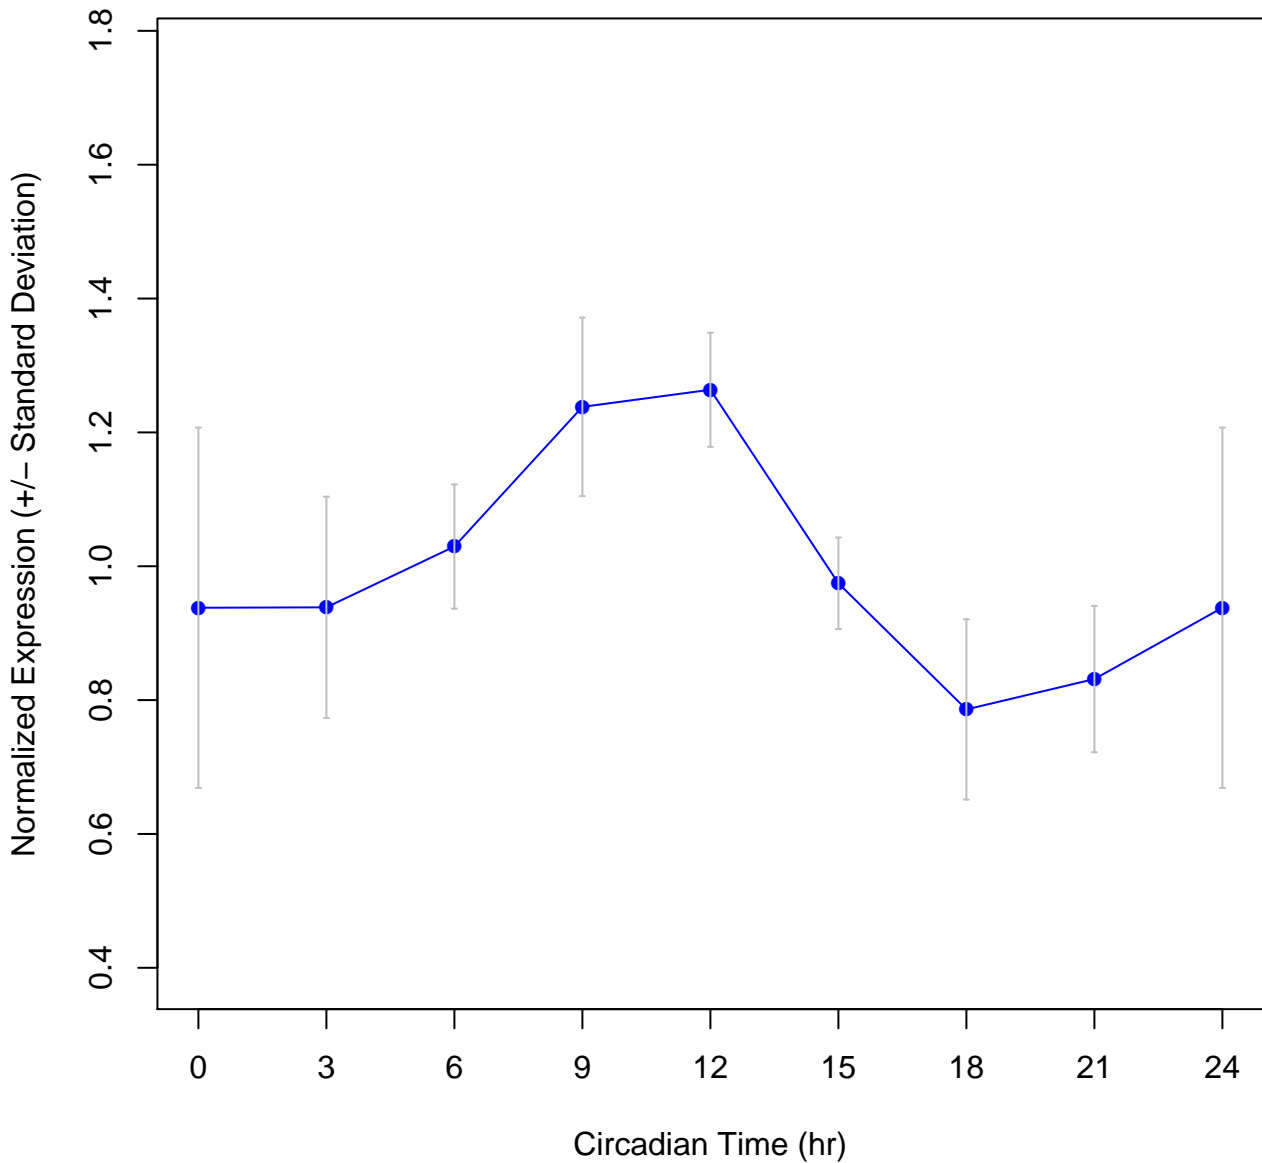



Supplement Figure 3 plch2

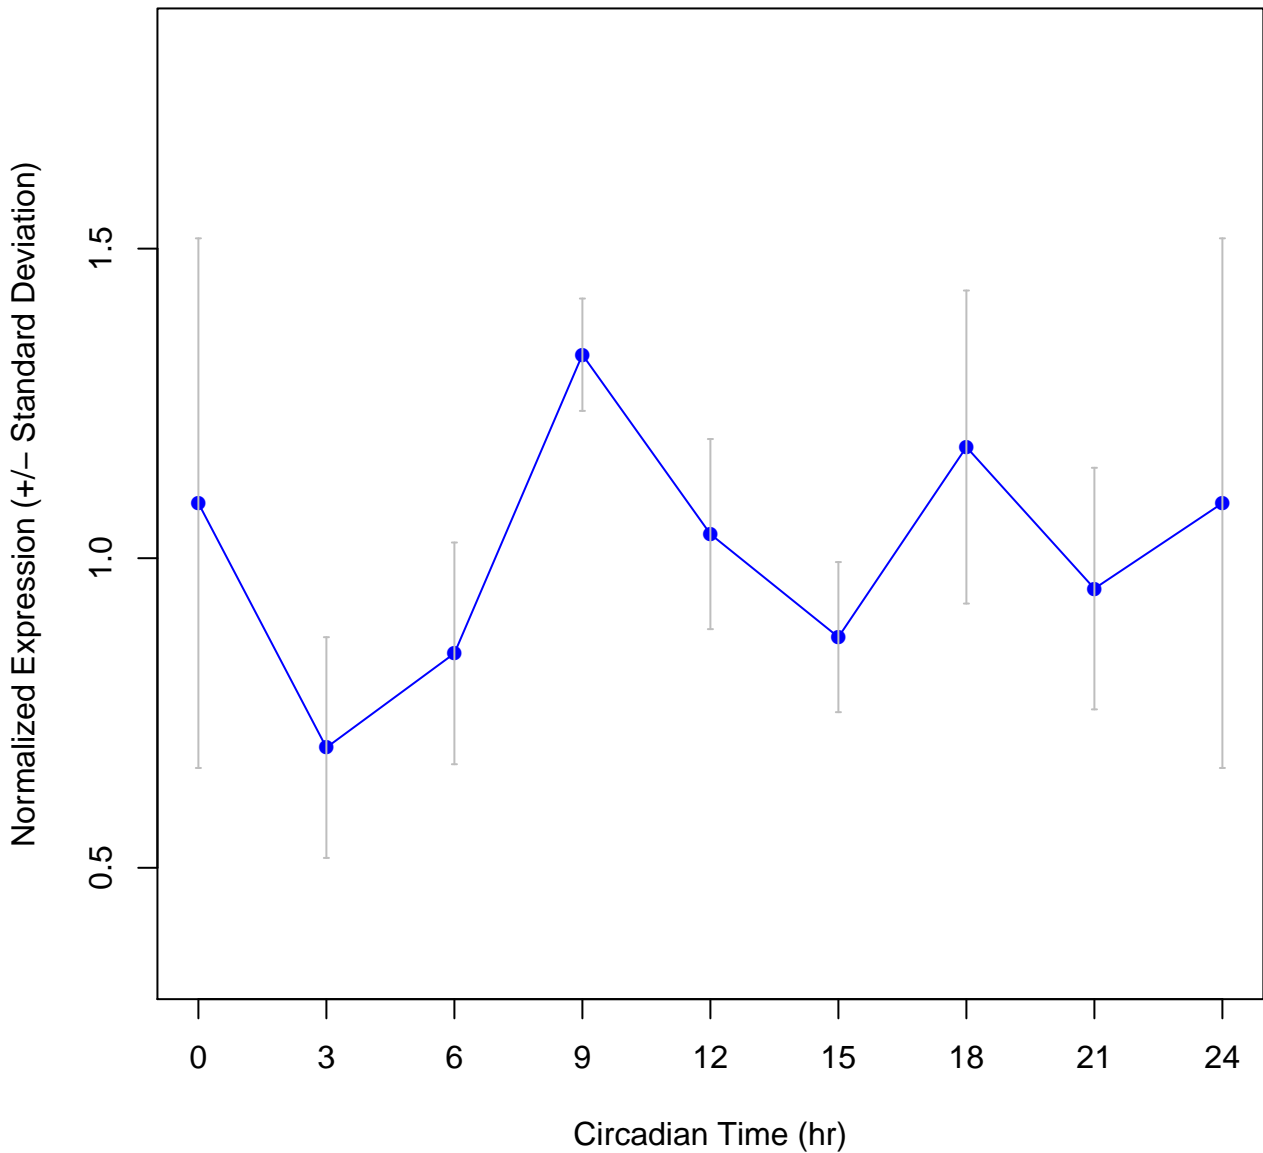

**Supplement Figure 3 plk1**

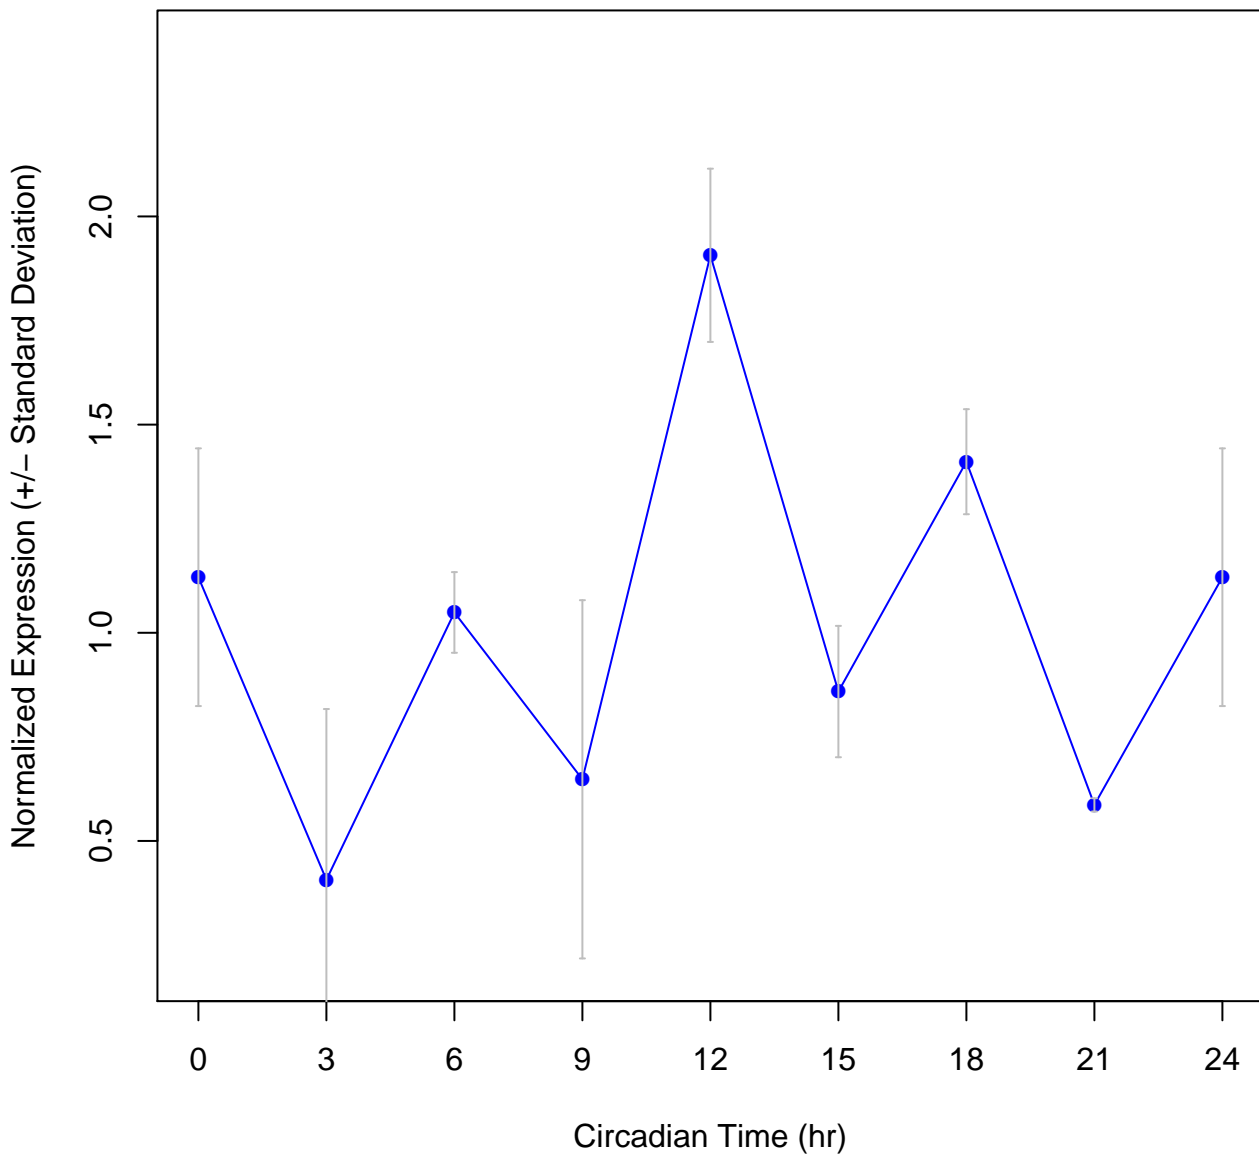

**Supplement Figure 3 polr2a**

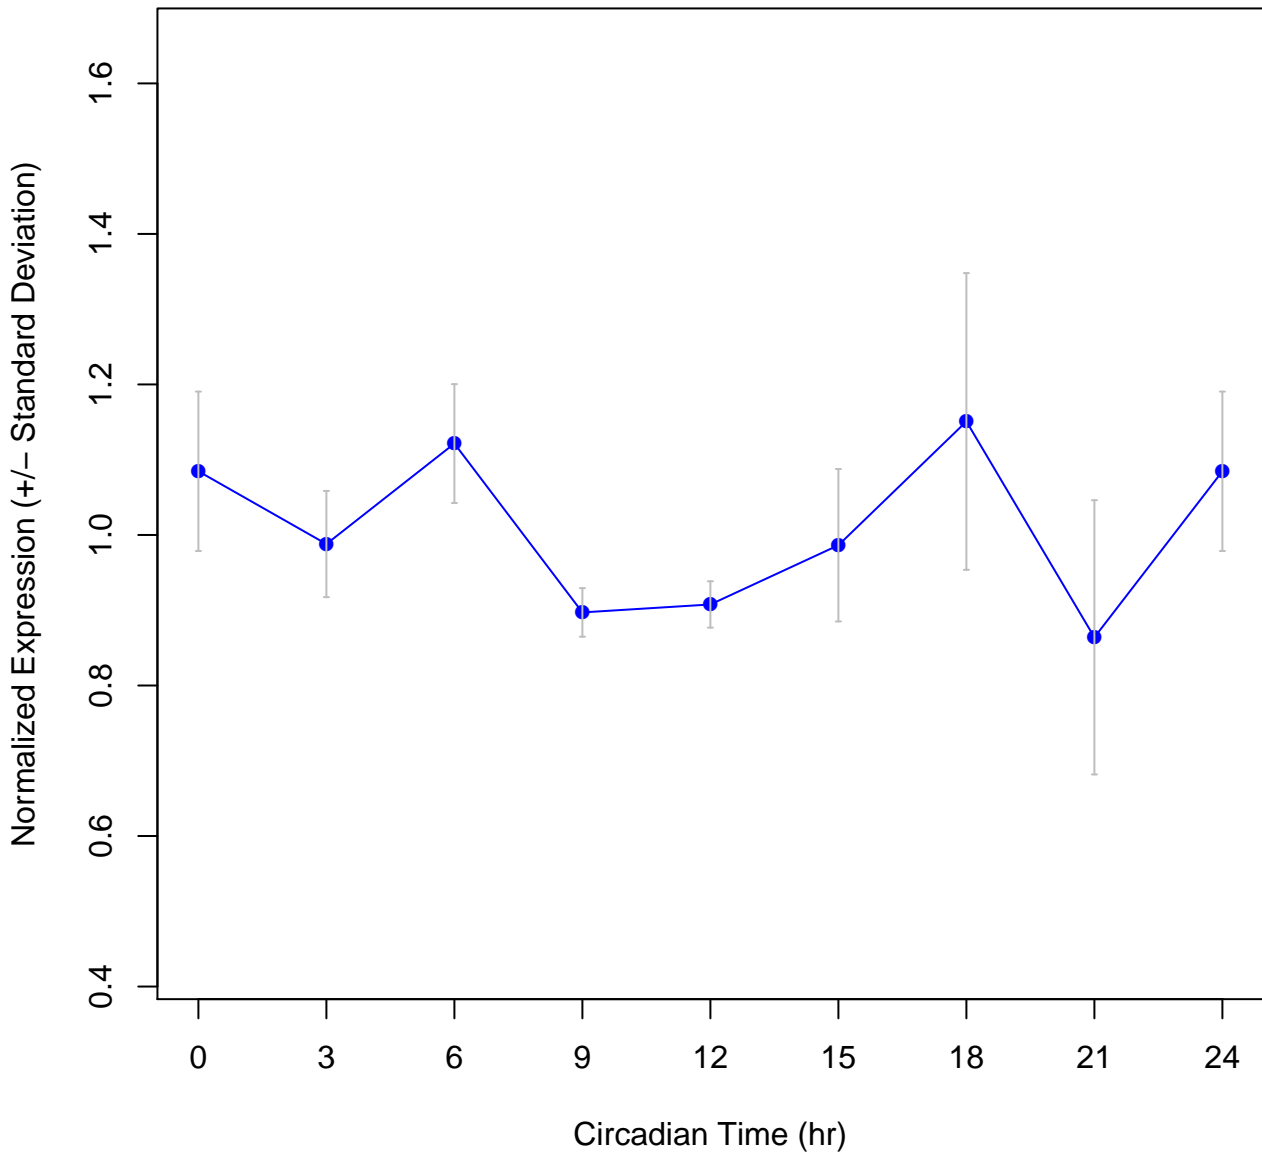

Supplement Figure 3 pomc

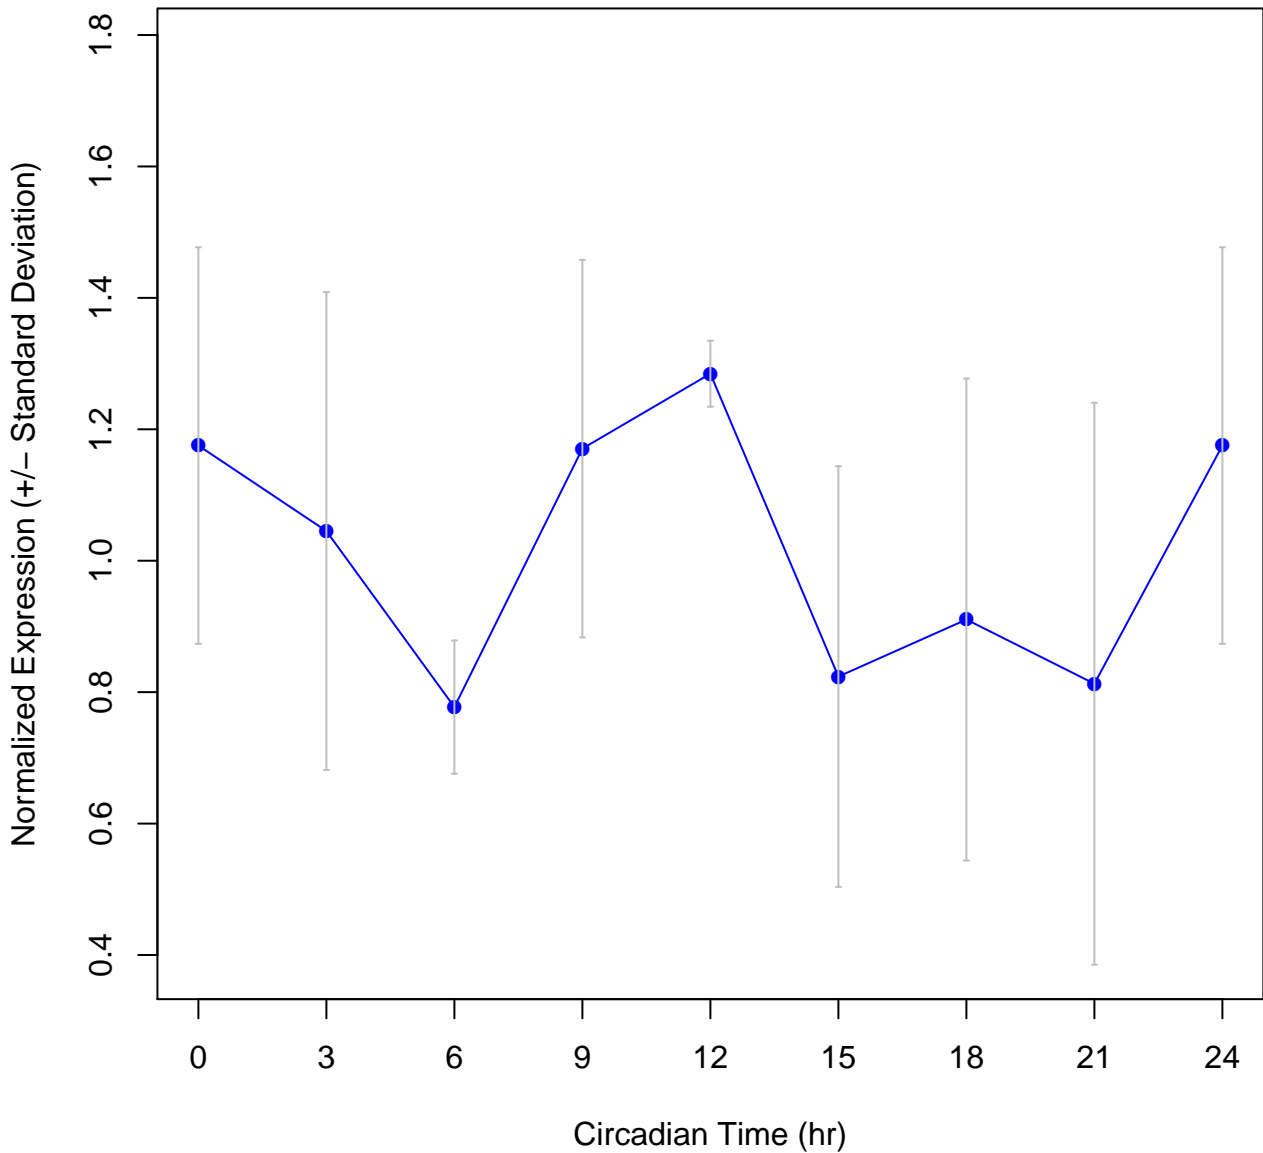

### Supplement Figure 3 pparaa

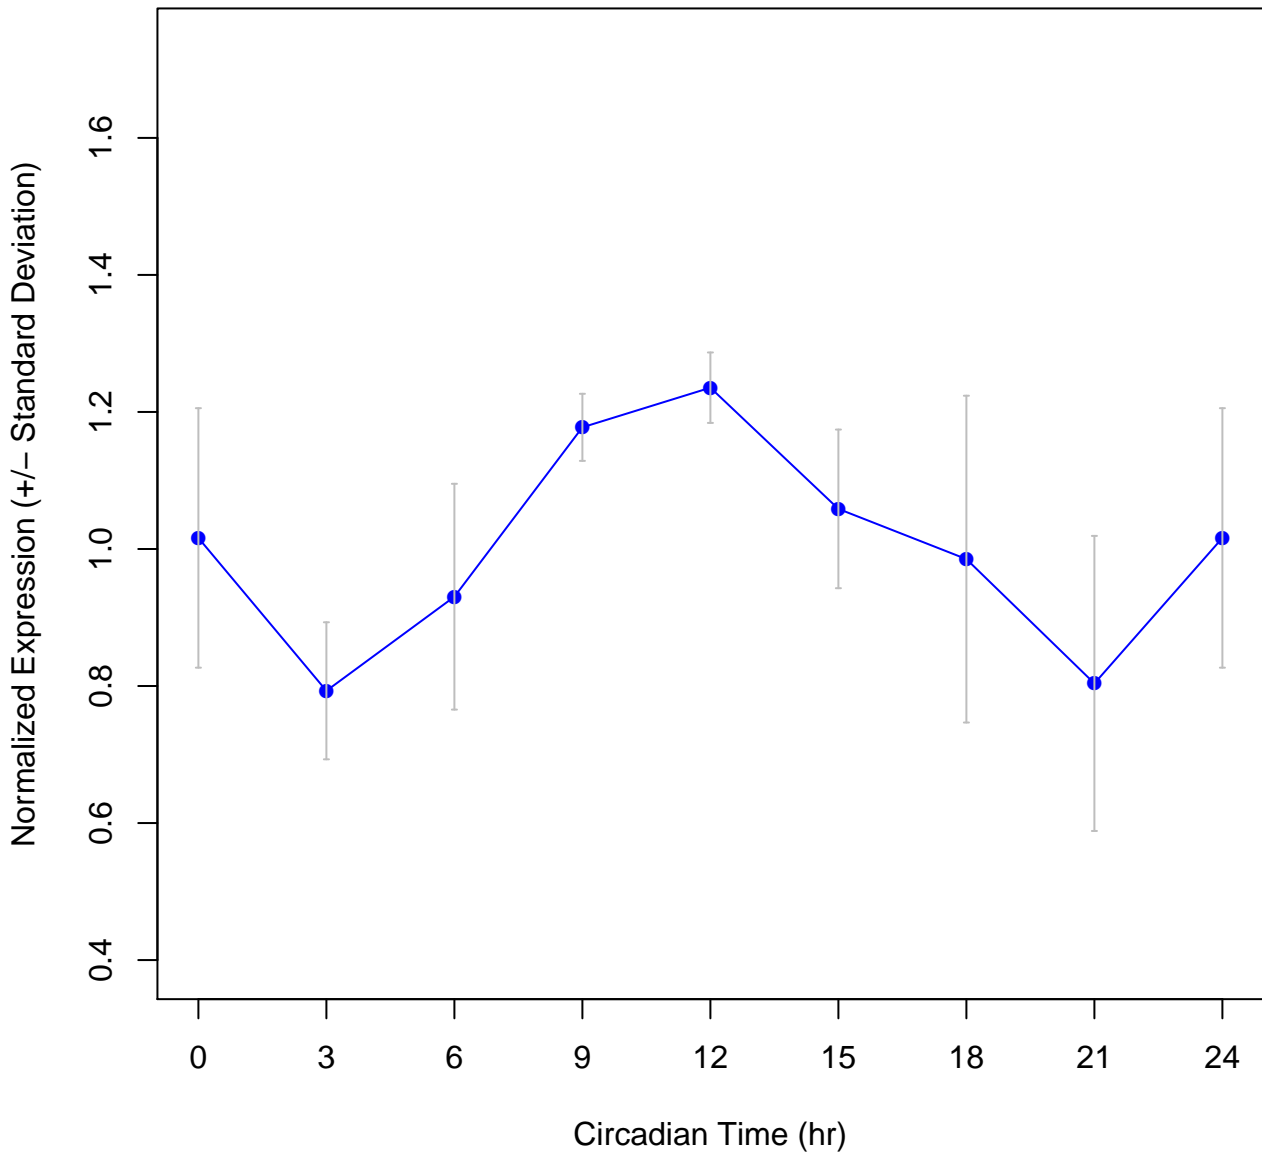

Supplement Figure 3 pparab

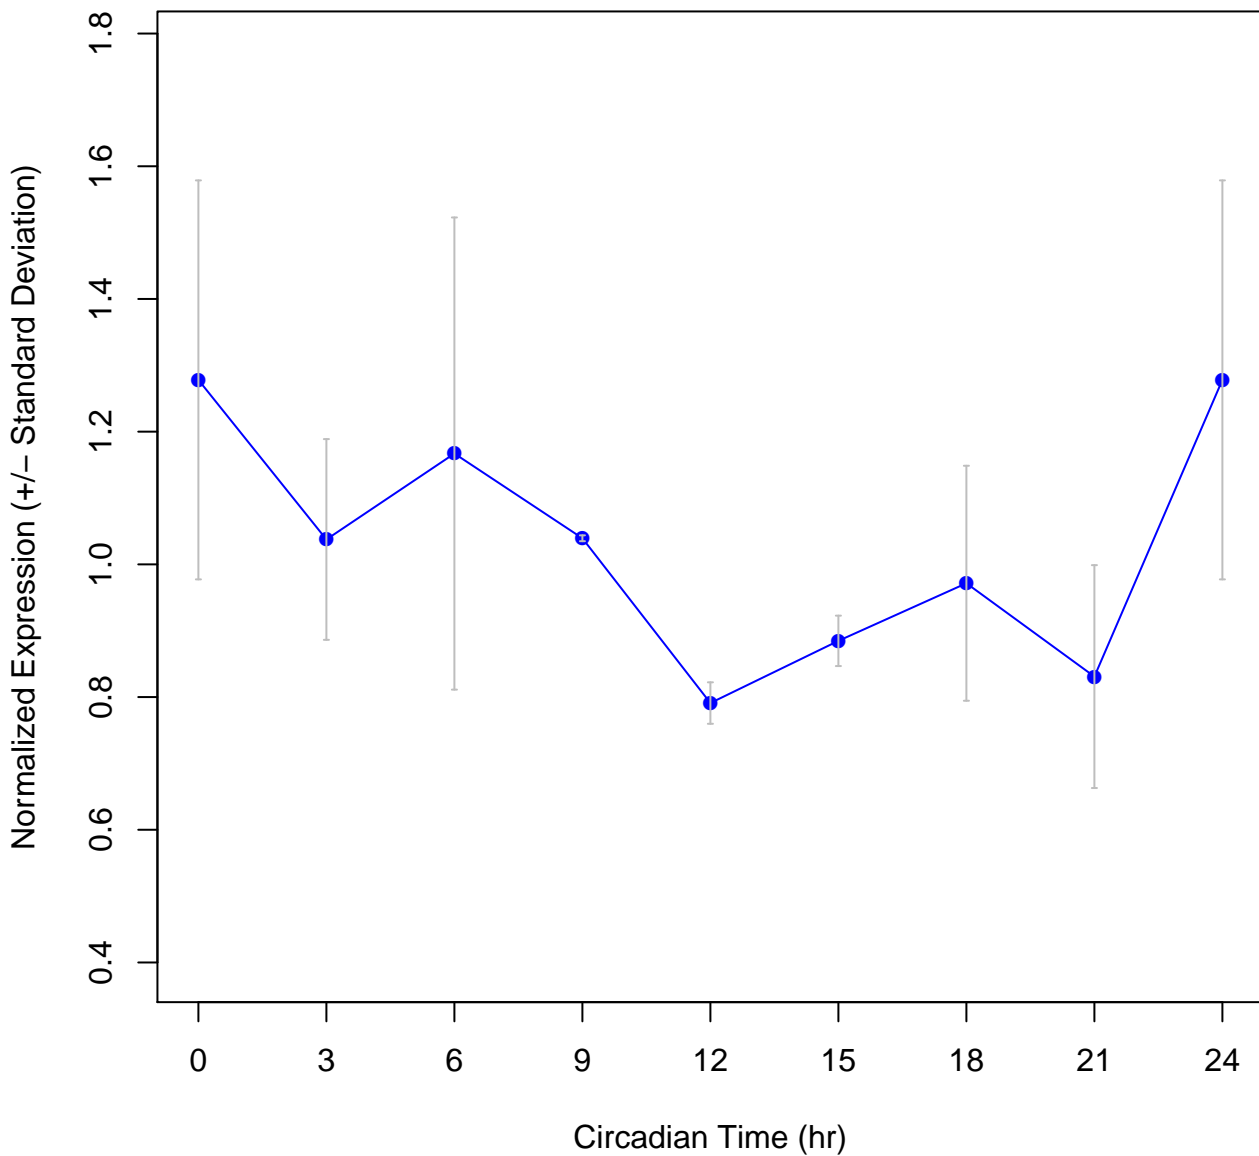

Supplement Figure 3 ppargc1a

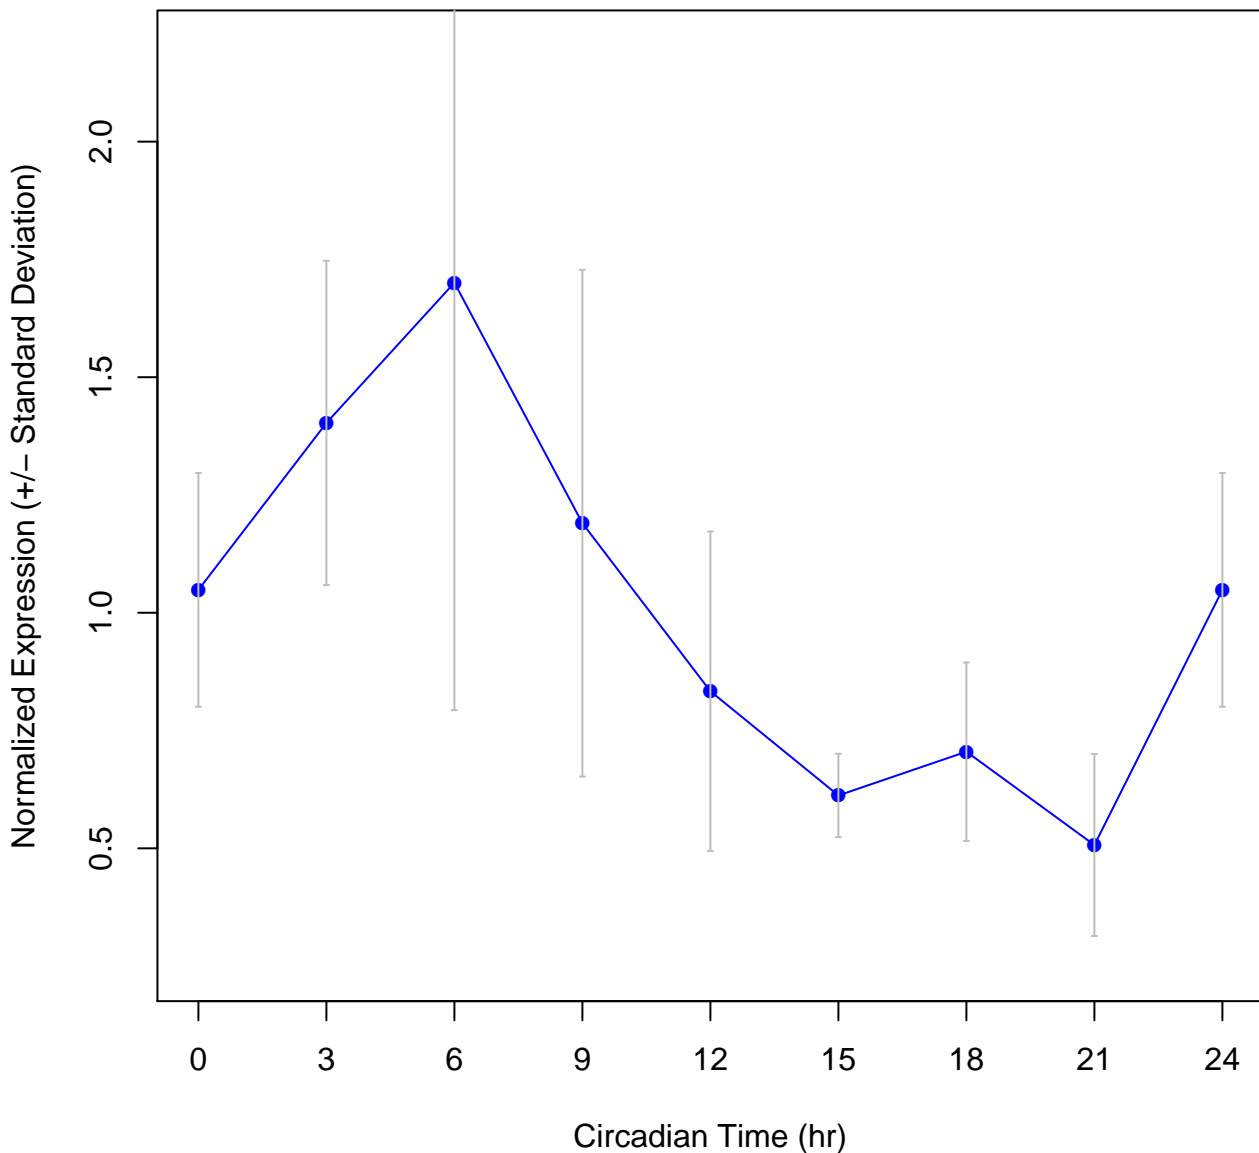

Supplement Figure 3 ppp1r27

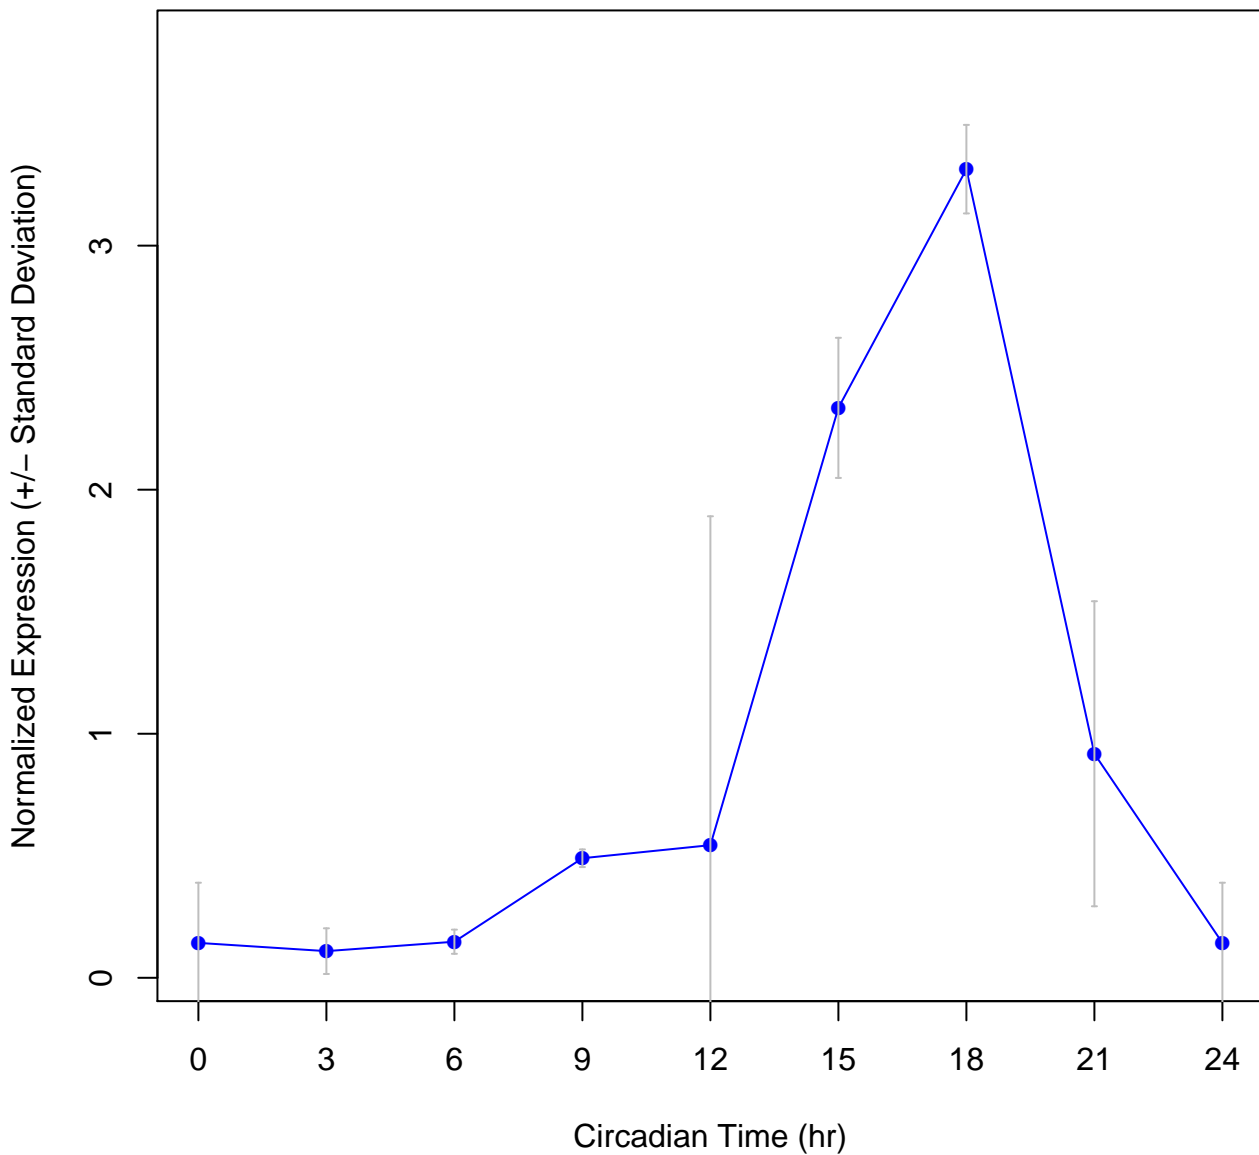



**Supplement Figure 3 prc1**

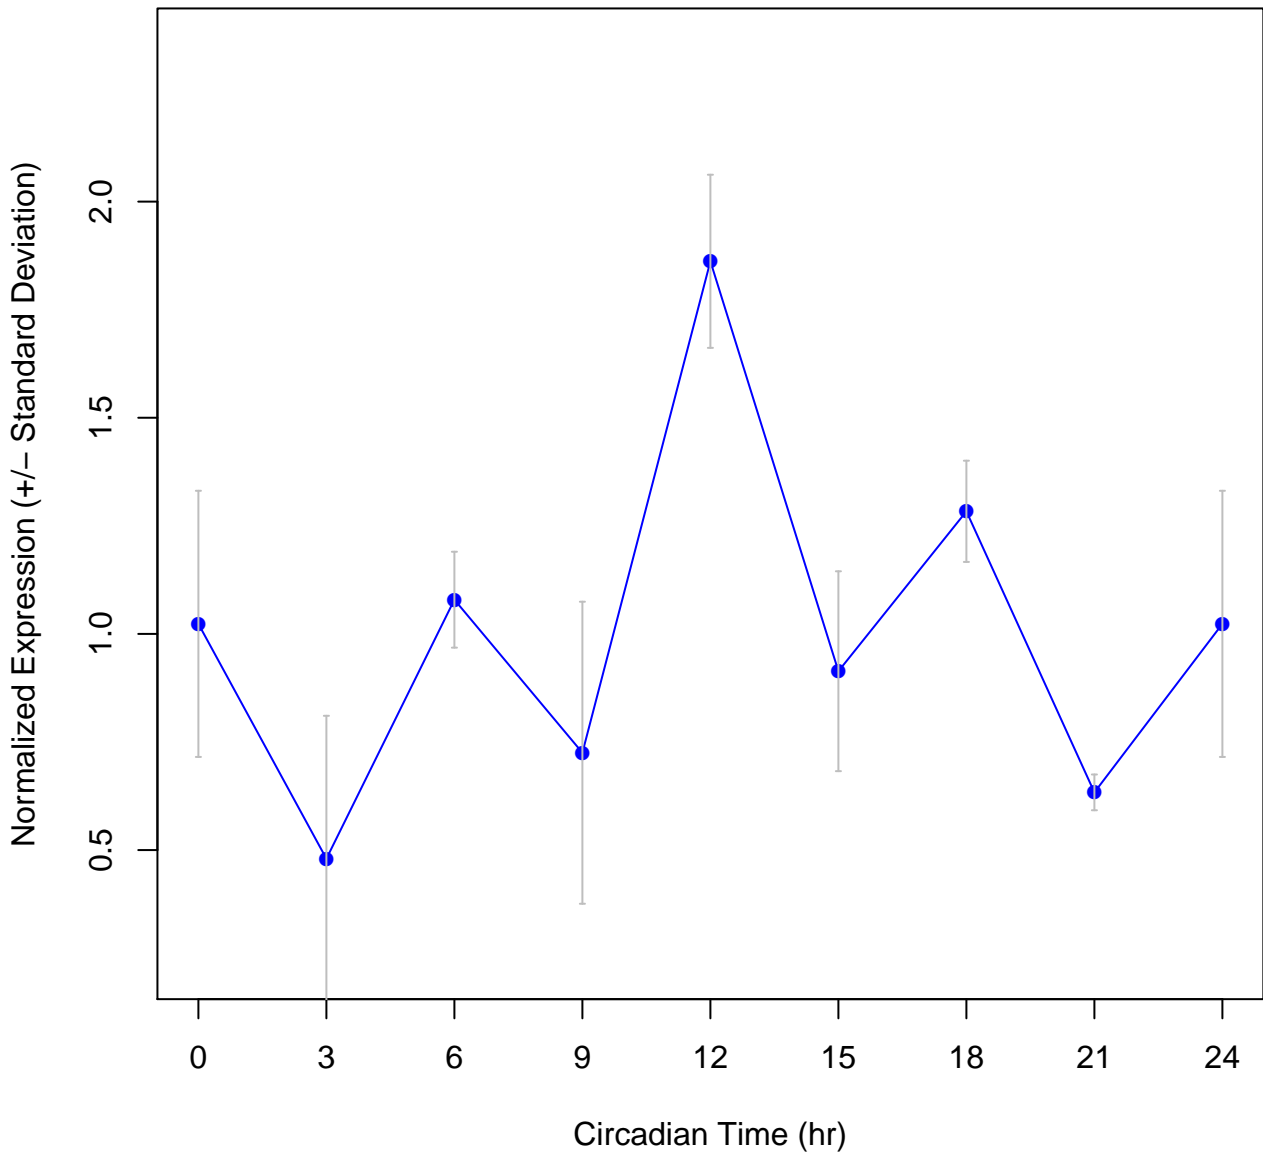

Supplement Figure 3 prkaa2

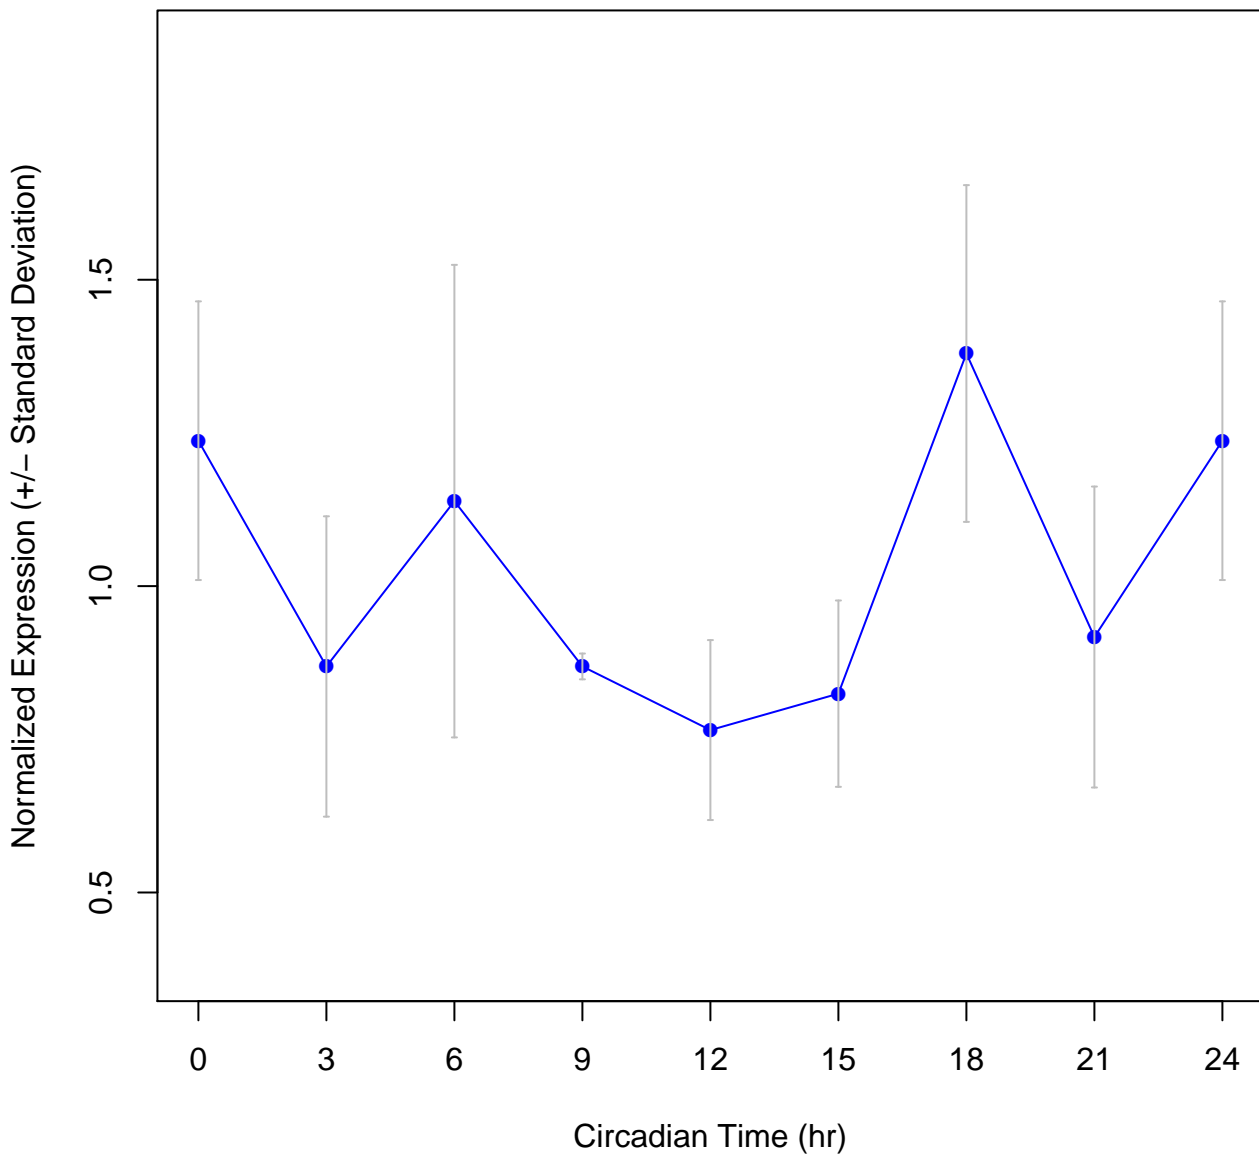

Supplement Figure 3 prkar2a

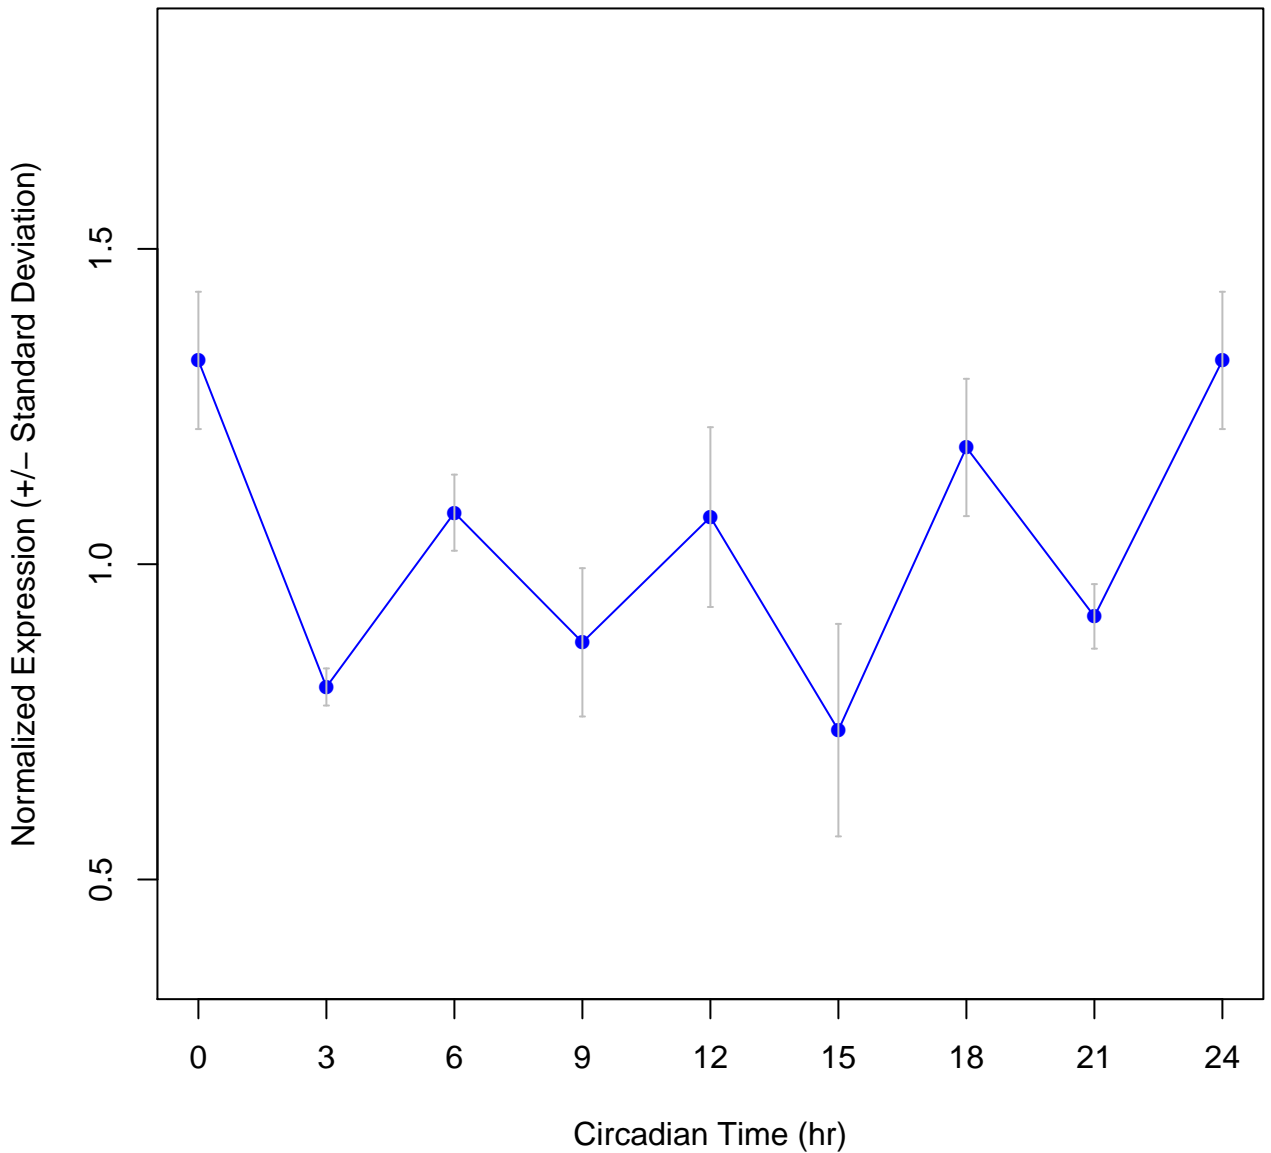

Supplement Figure 3 prkca\_1

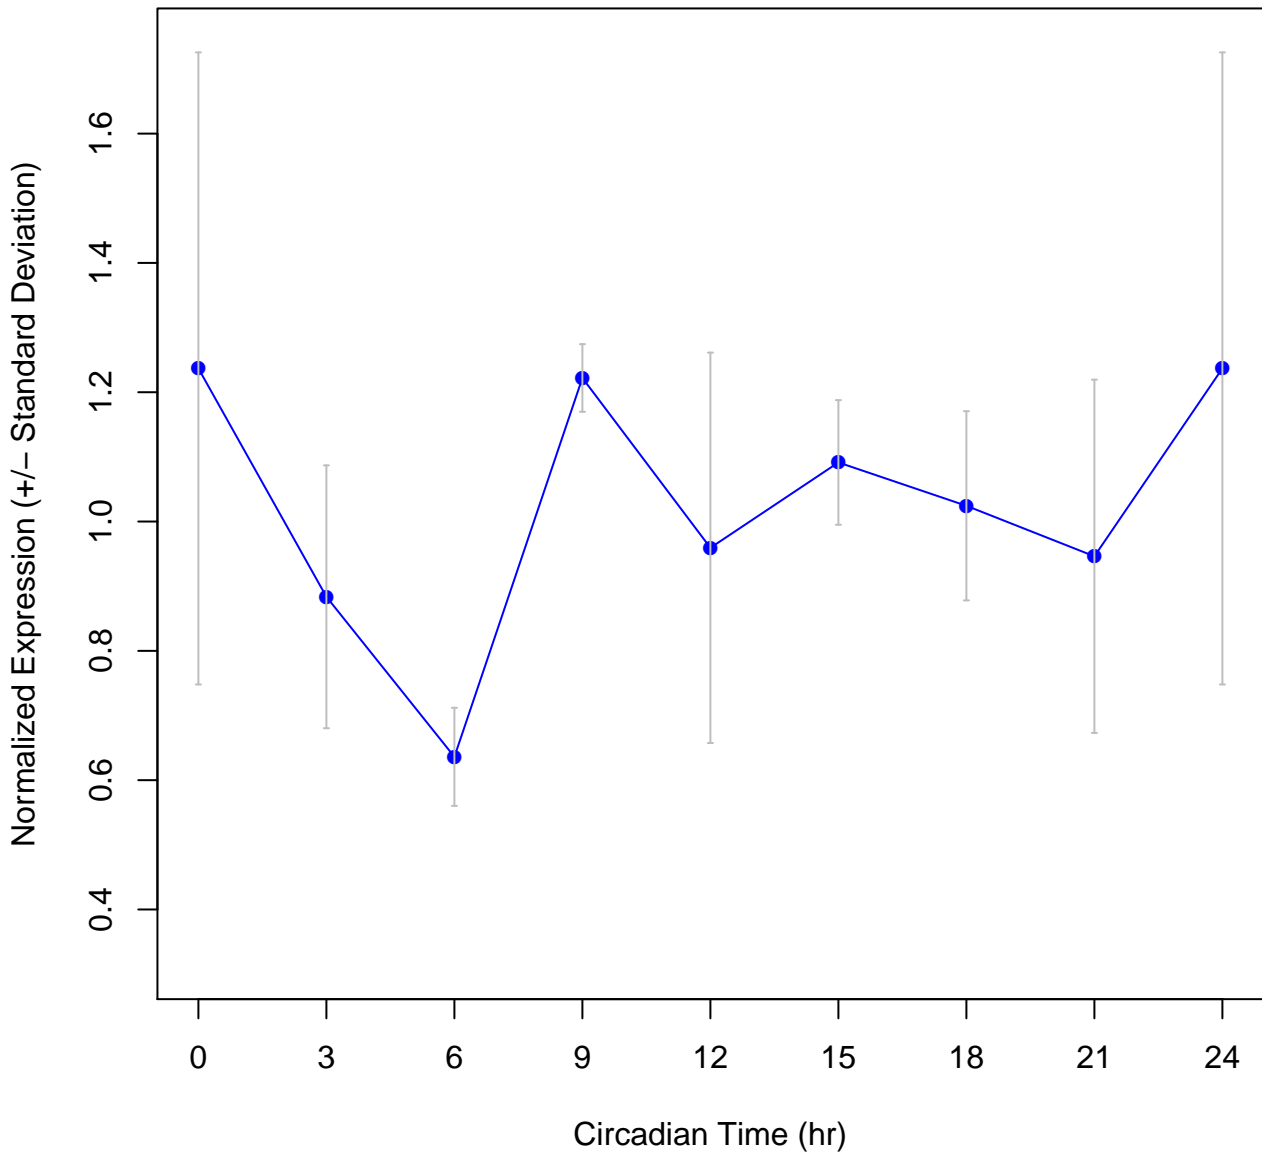

Supplement Figure 3 prkca\_2

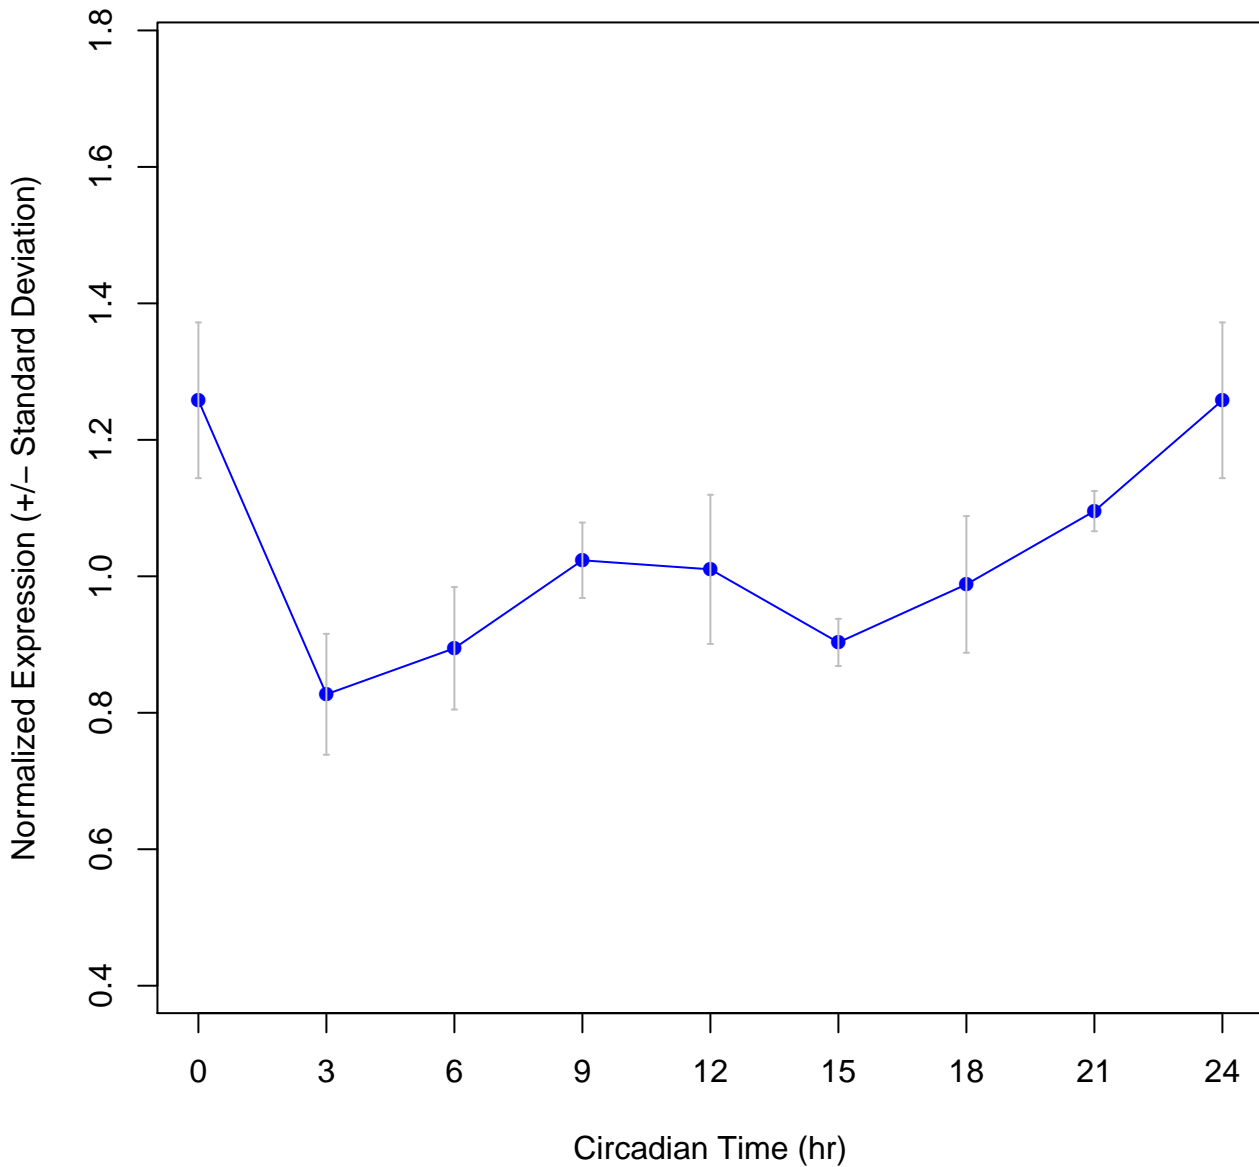

Supplement Figure 3 prkcb

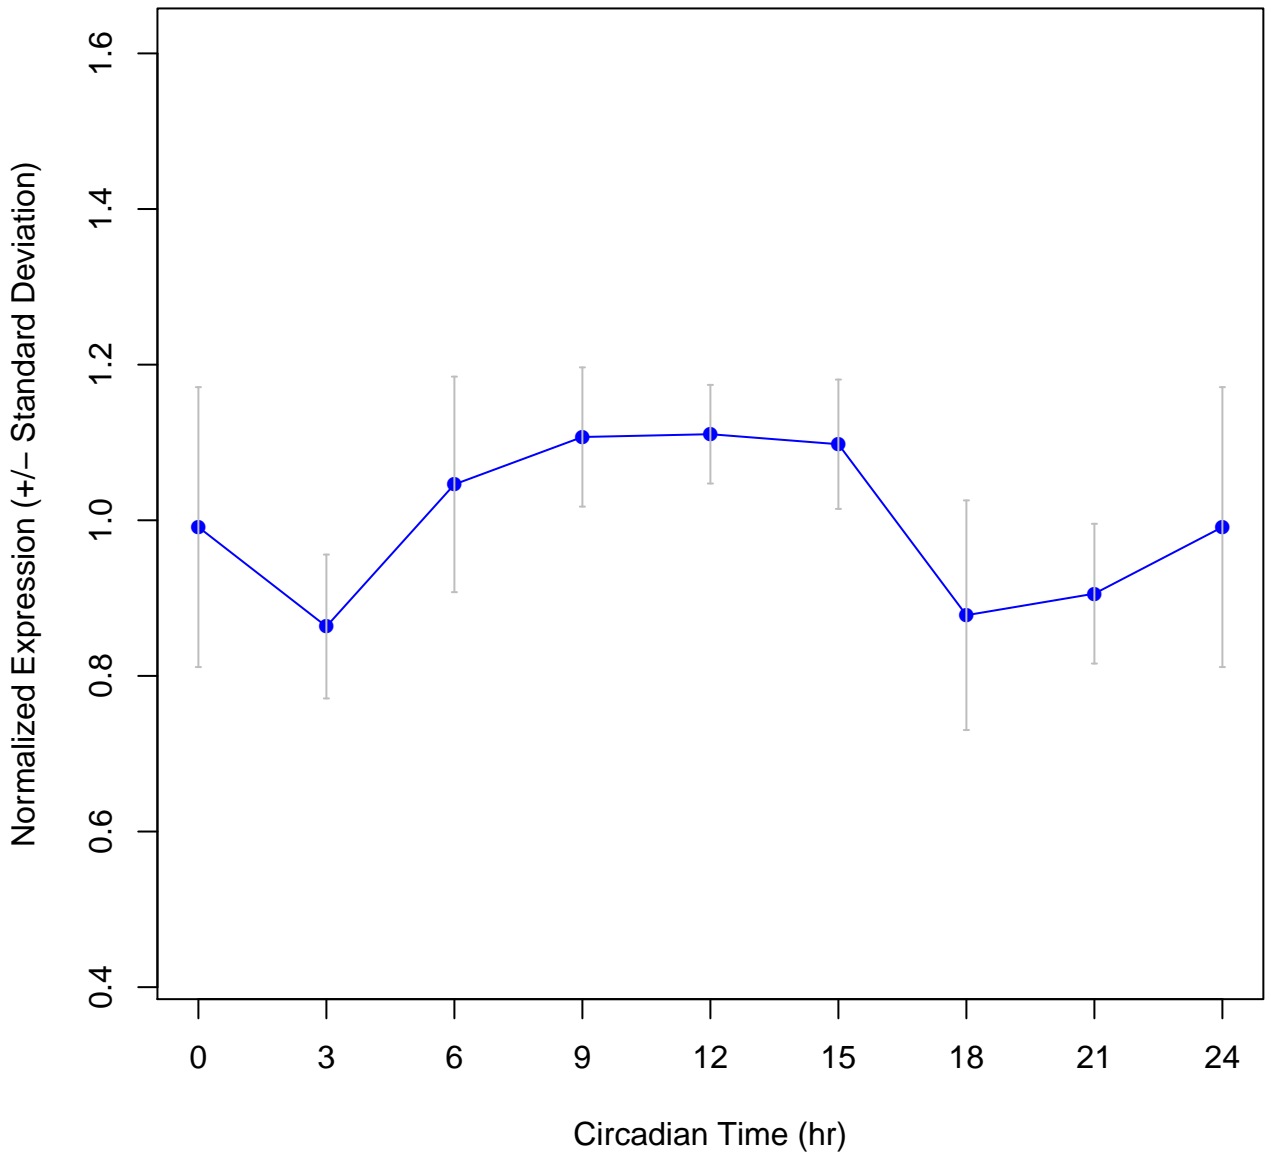

**Supplement Figure 3 prkdc**

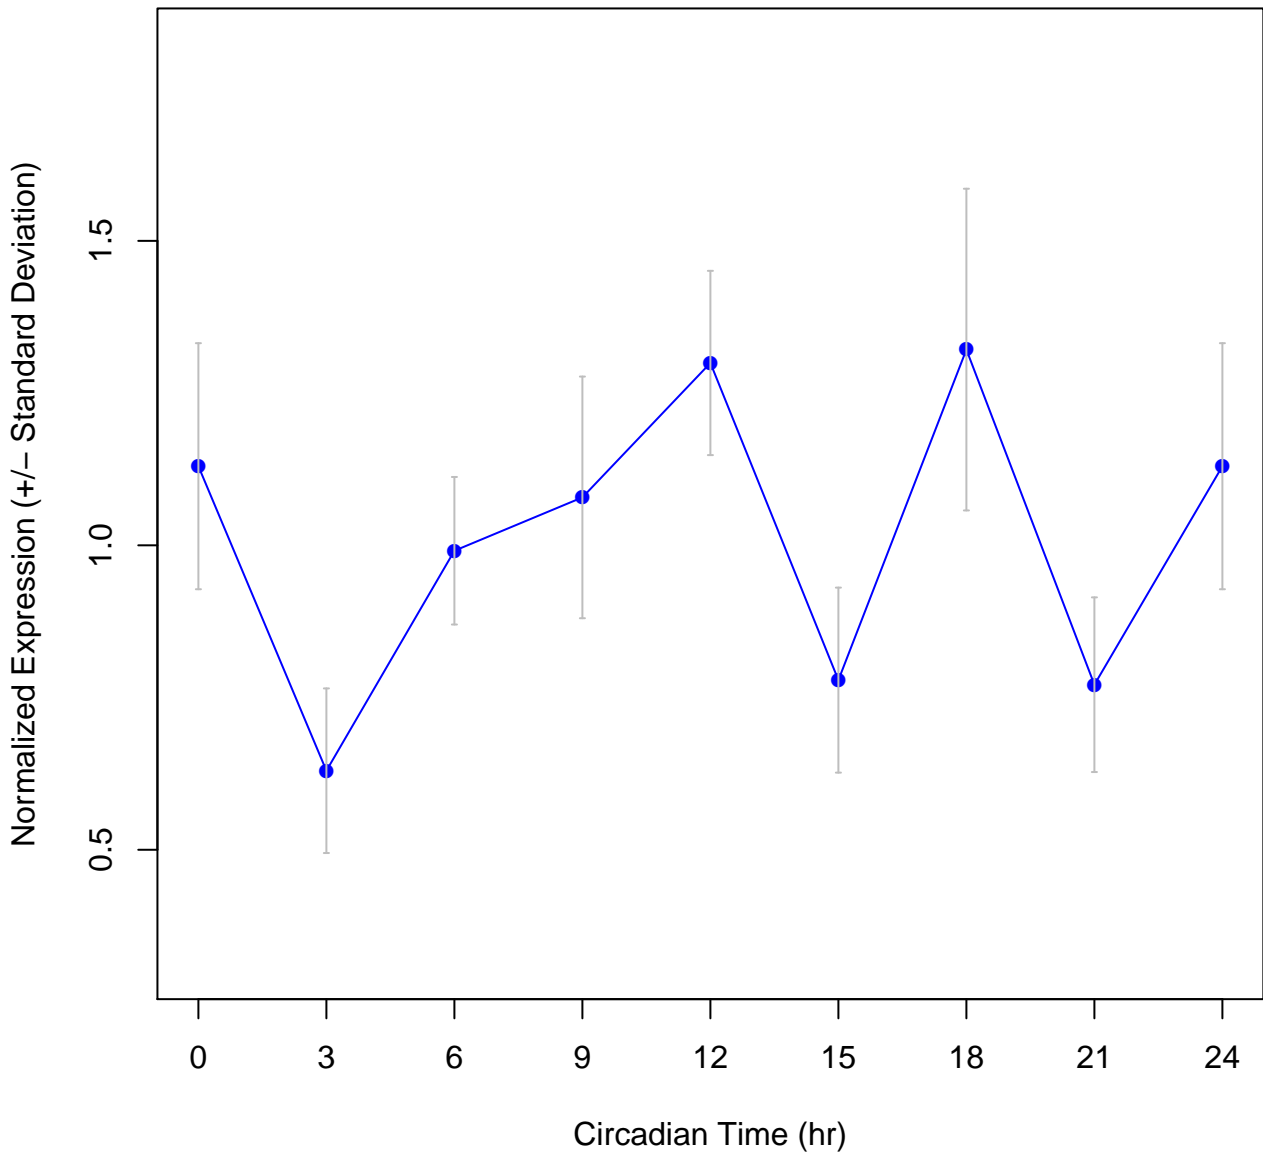

**Supplement Figure 3 rab3b**

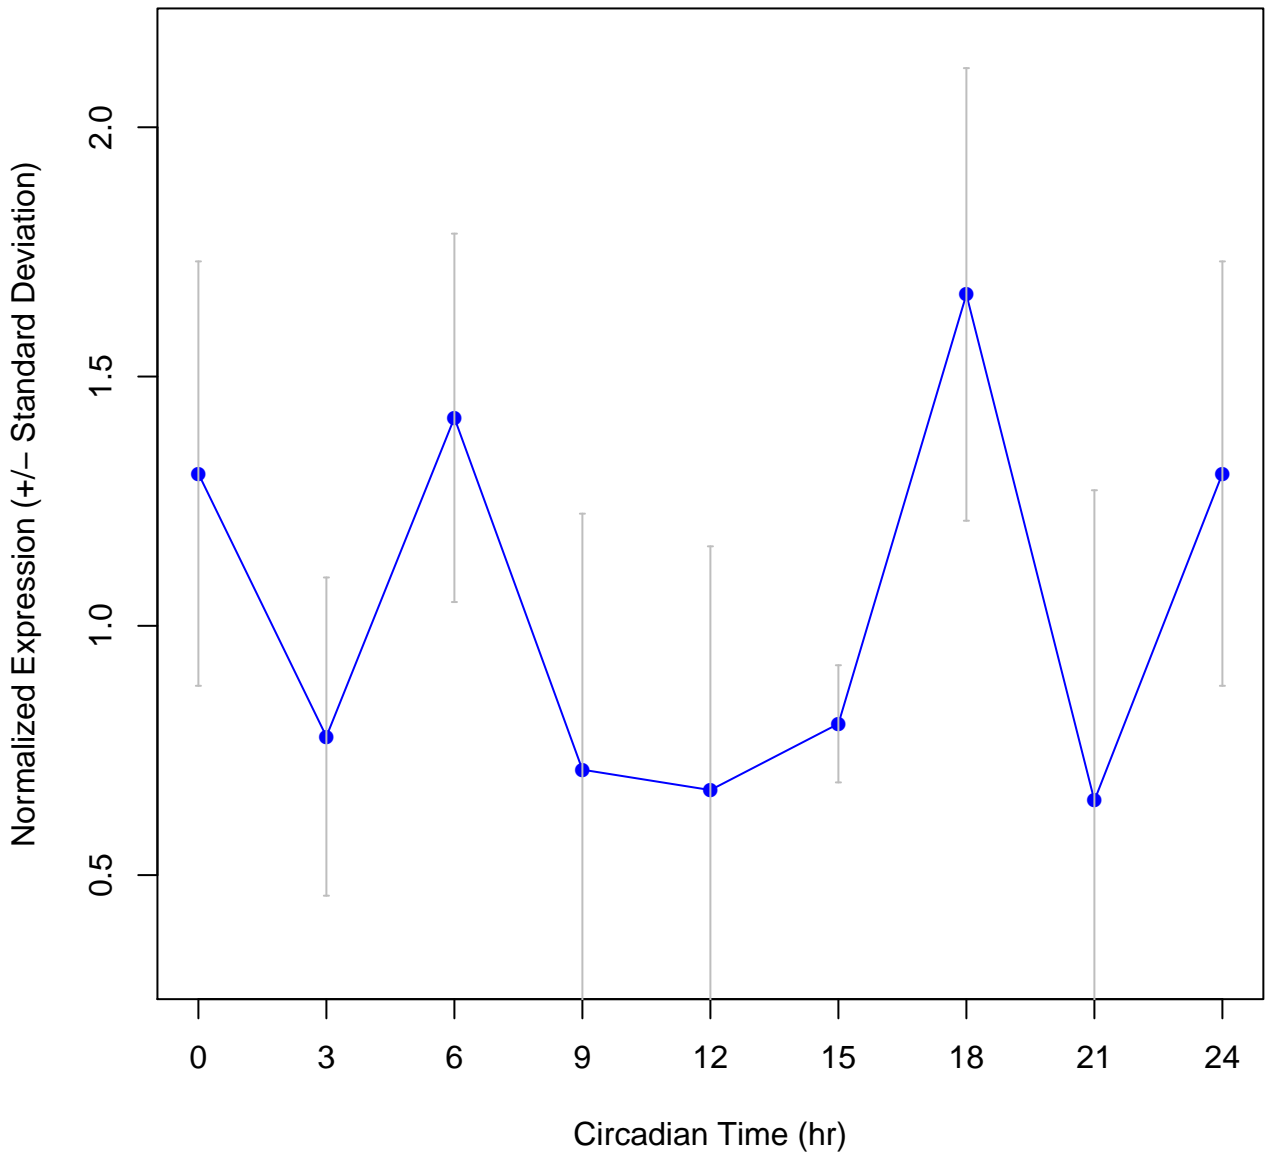



**Supplement Figure 3 rara**

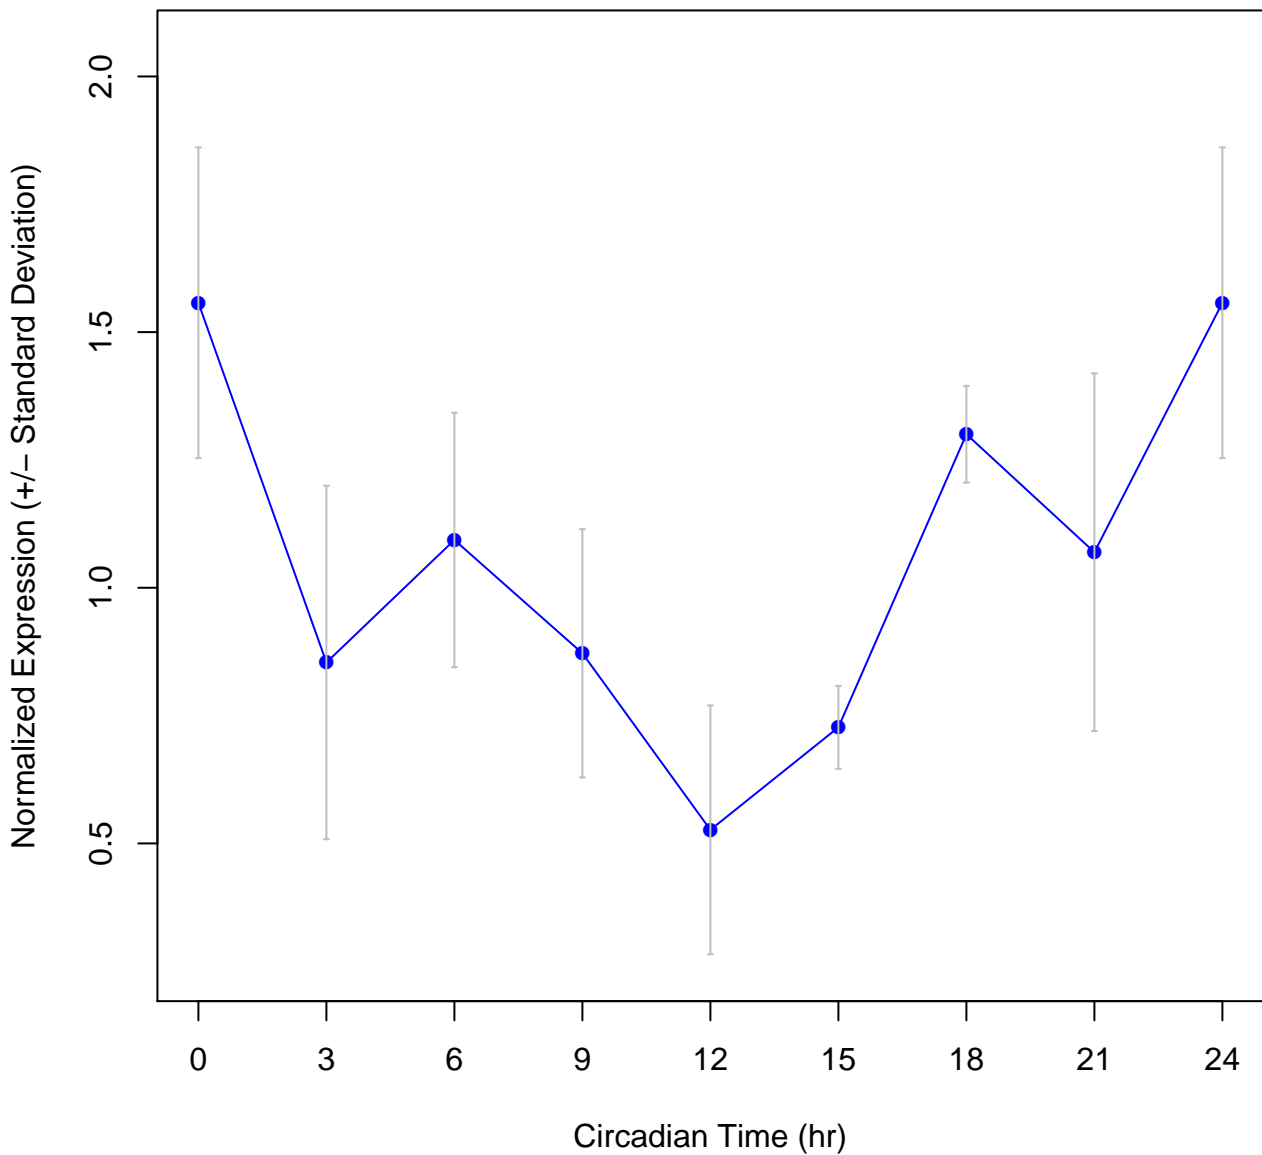

**Supplement Figure 3 rarb**

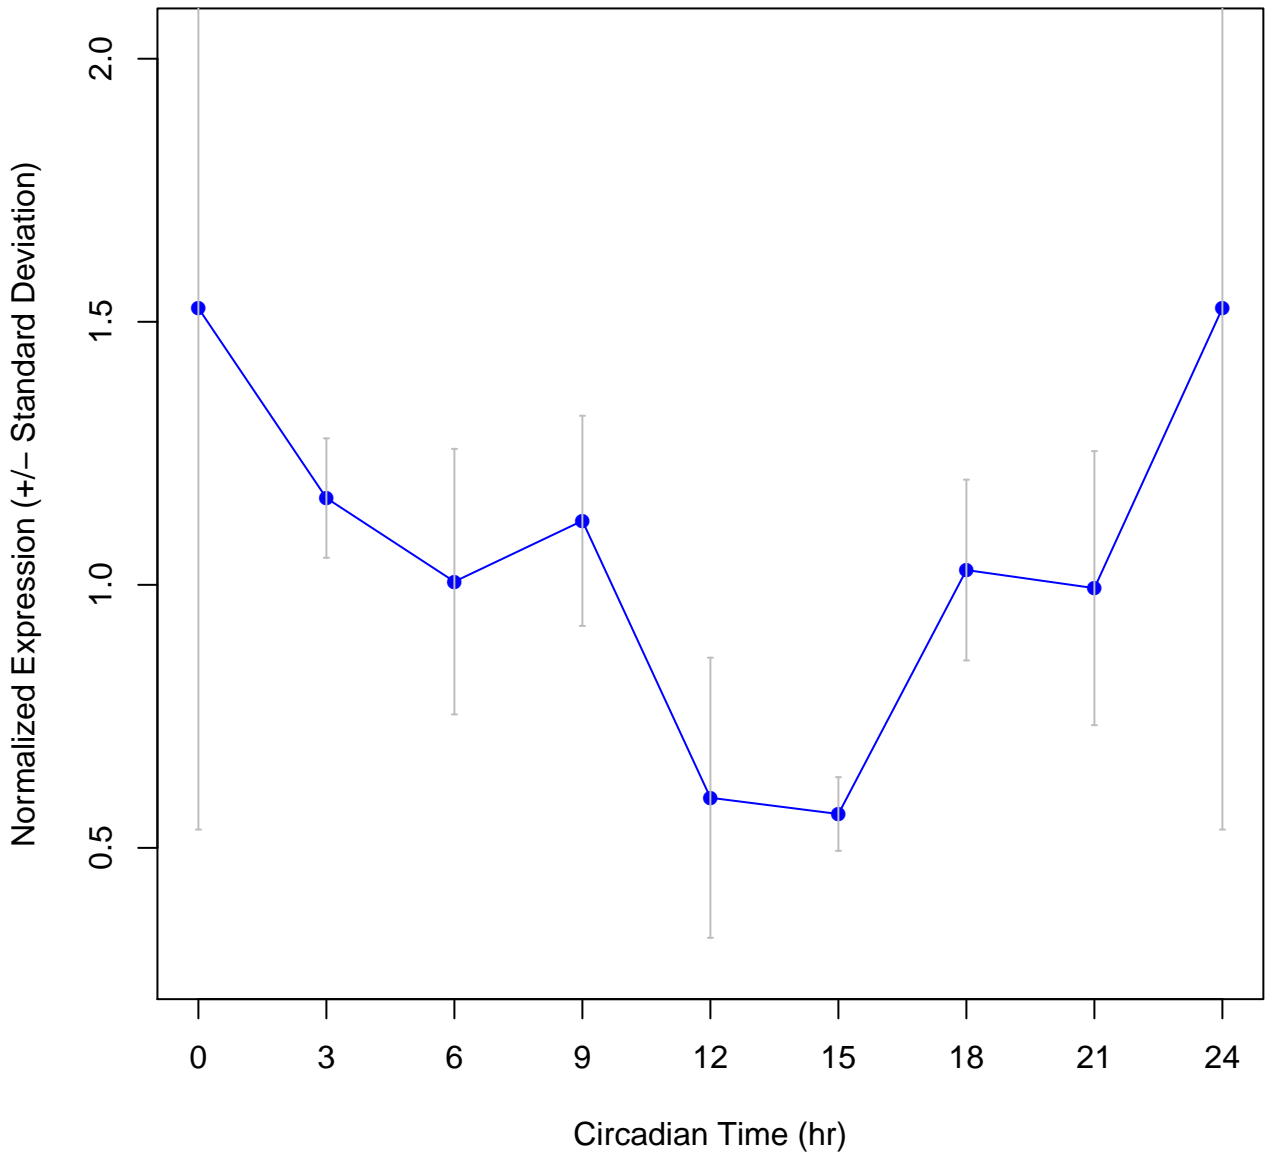

**Supplement Figure 3 raver1**

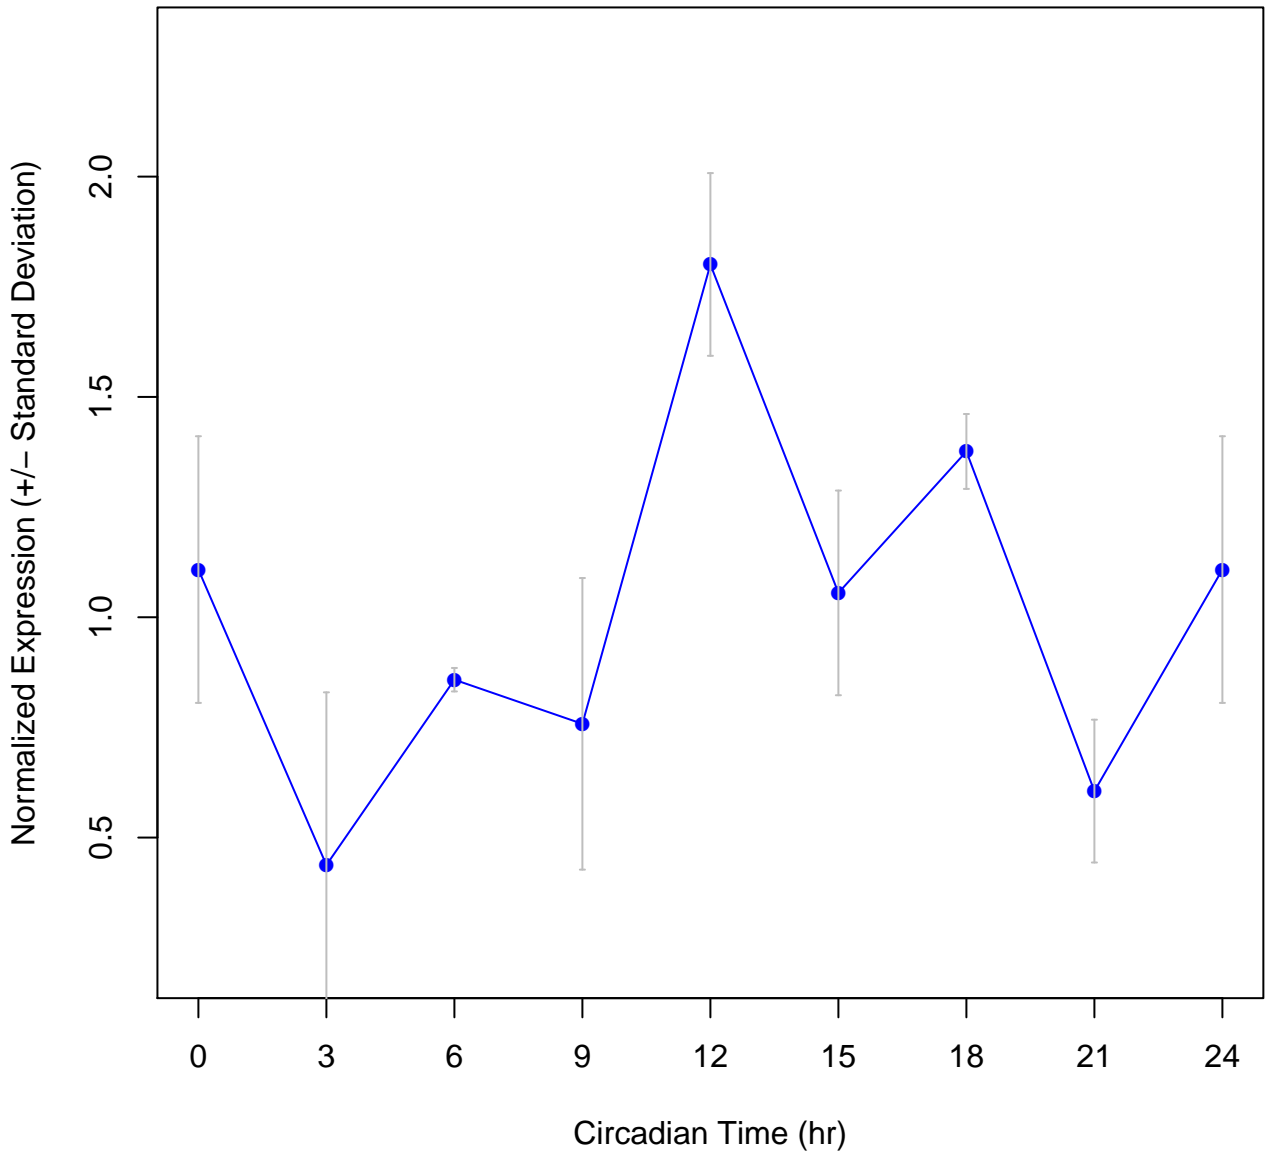

**Supplement Figure 3 rbbp5**

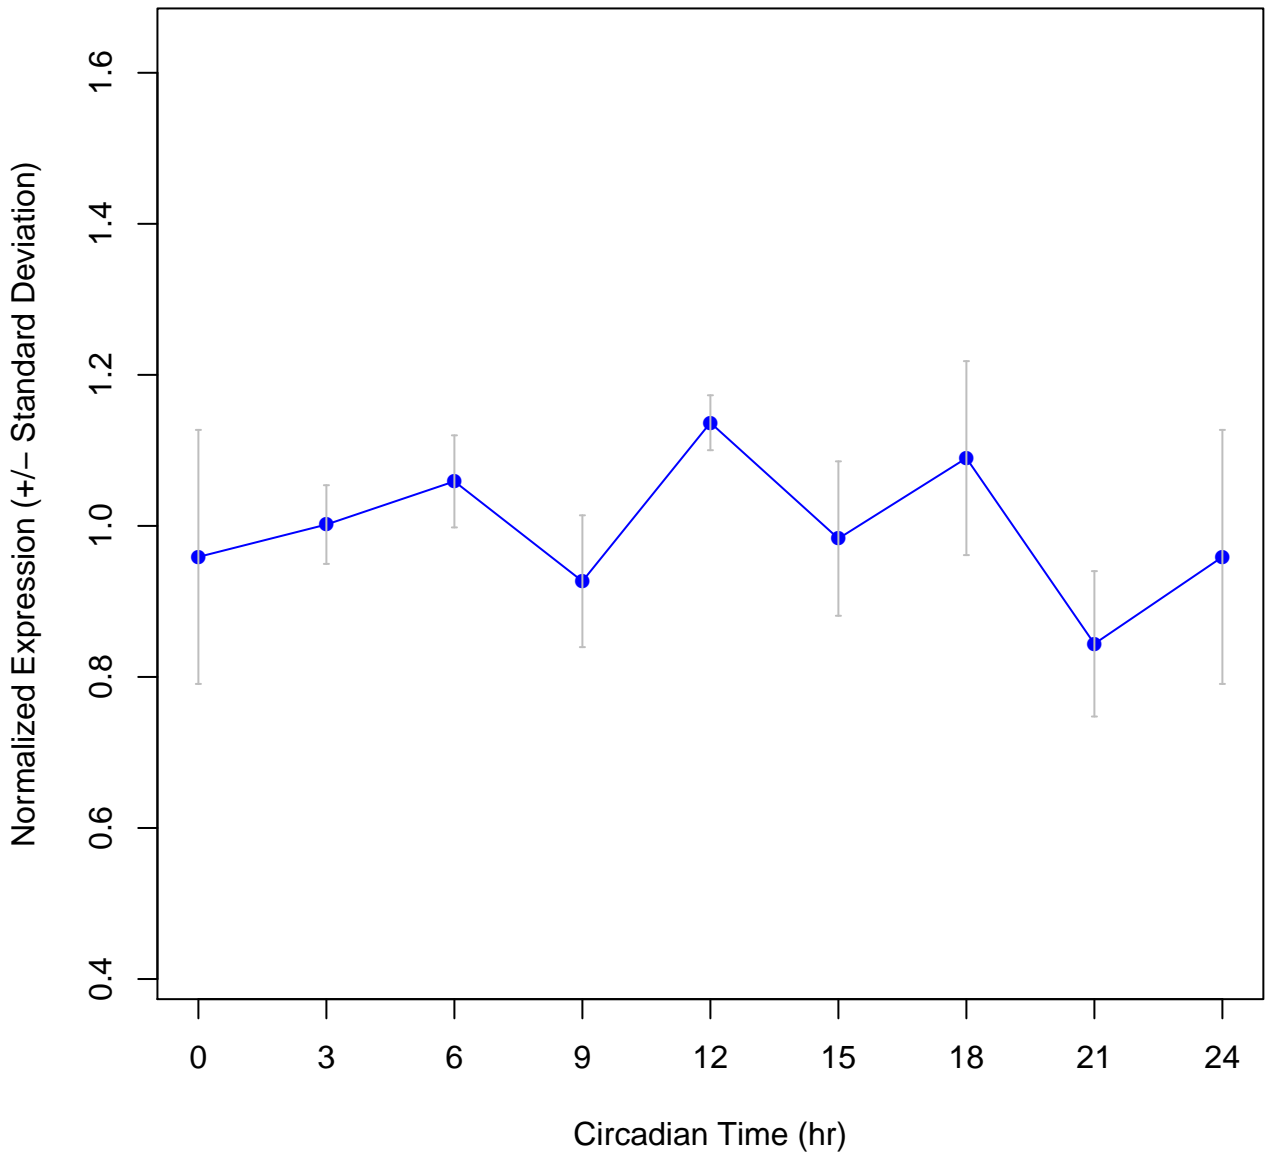

**Supplement Figure 3 rora**

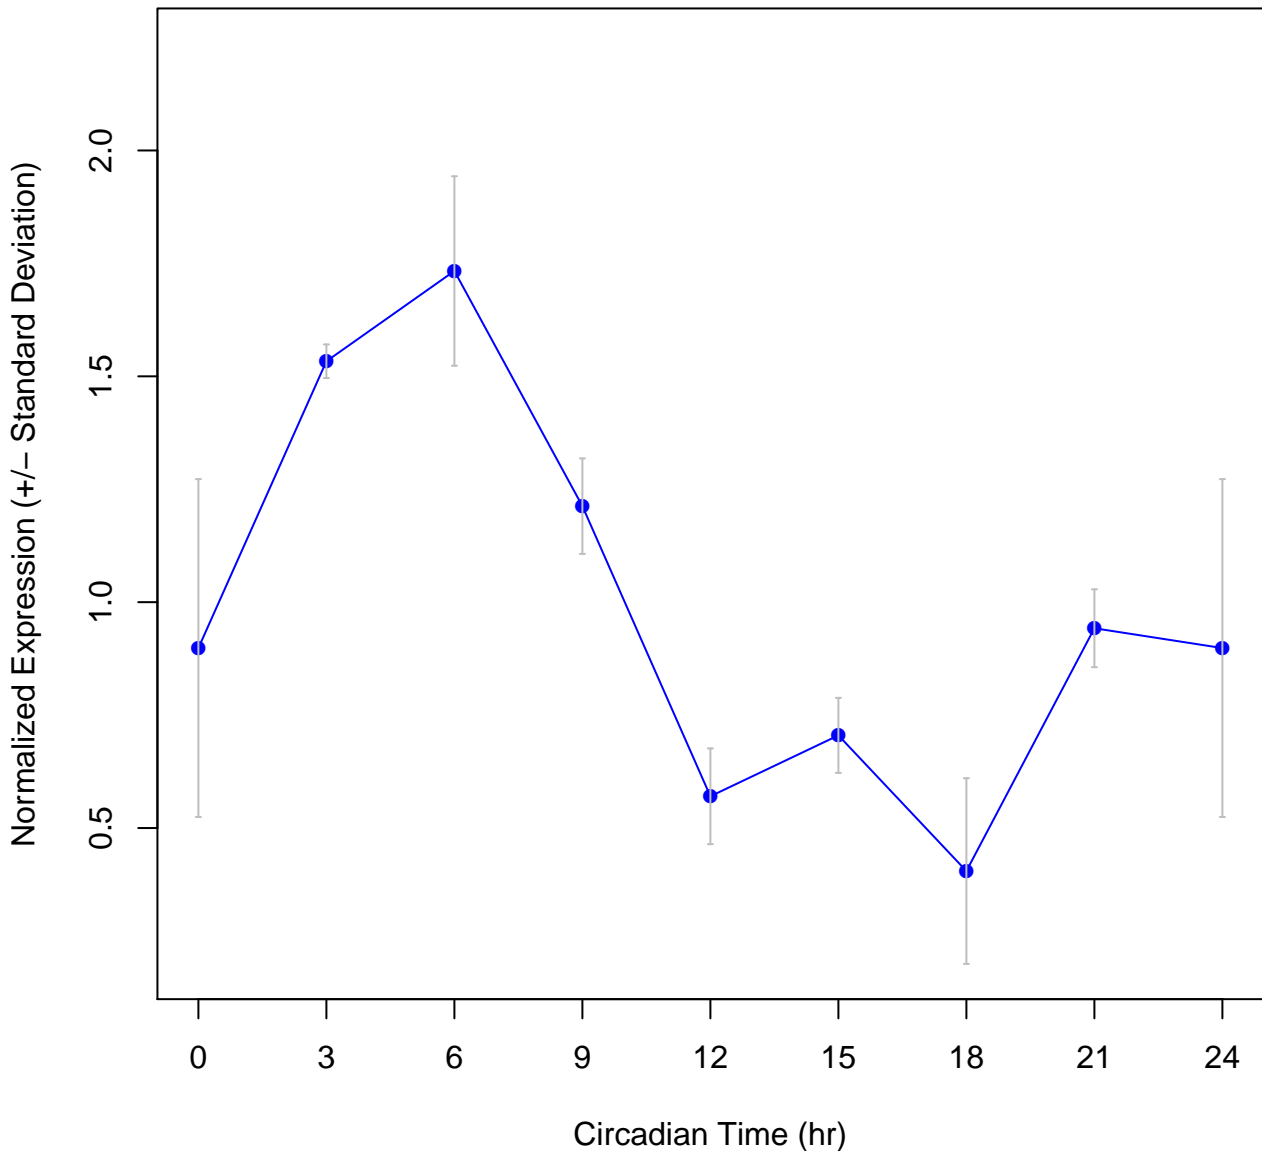

Supplement Figure 3 rps6ka2

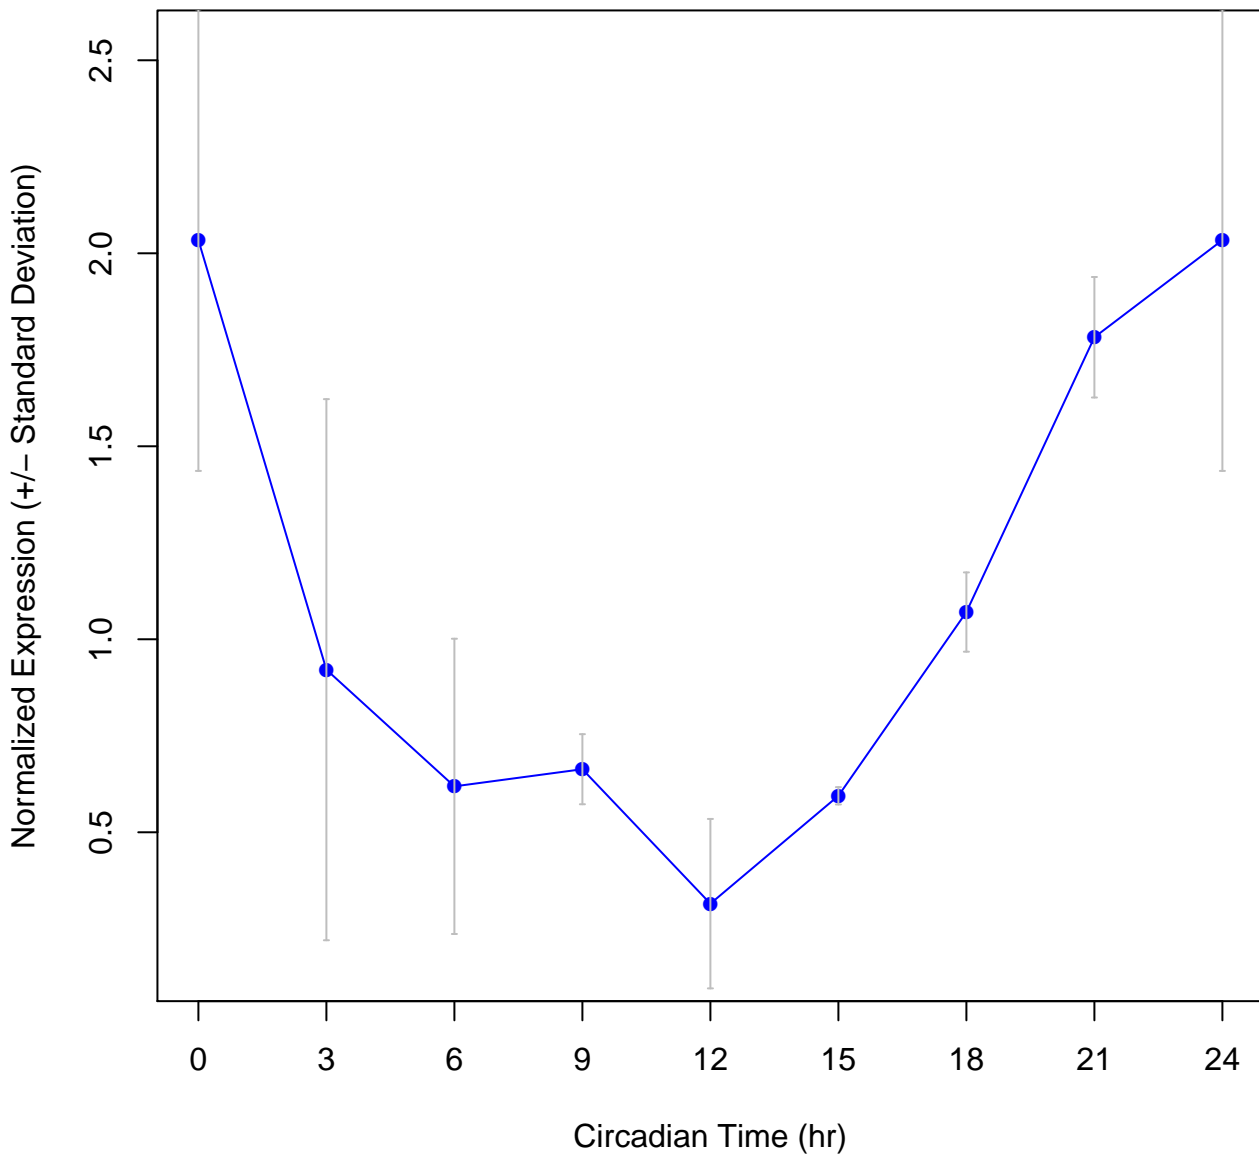

**Supplement Figure 3 rps6kb1**

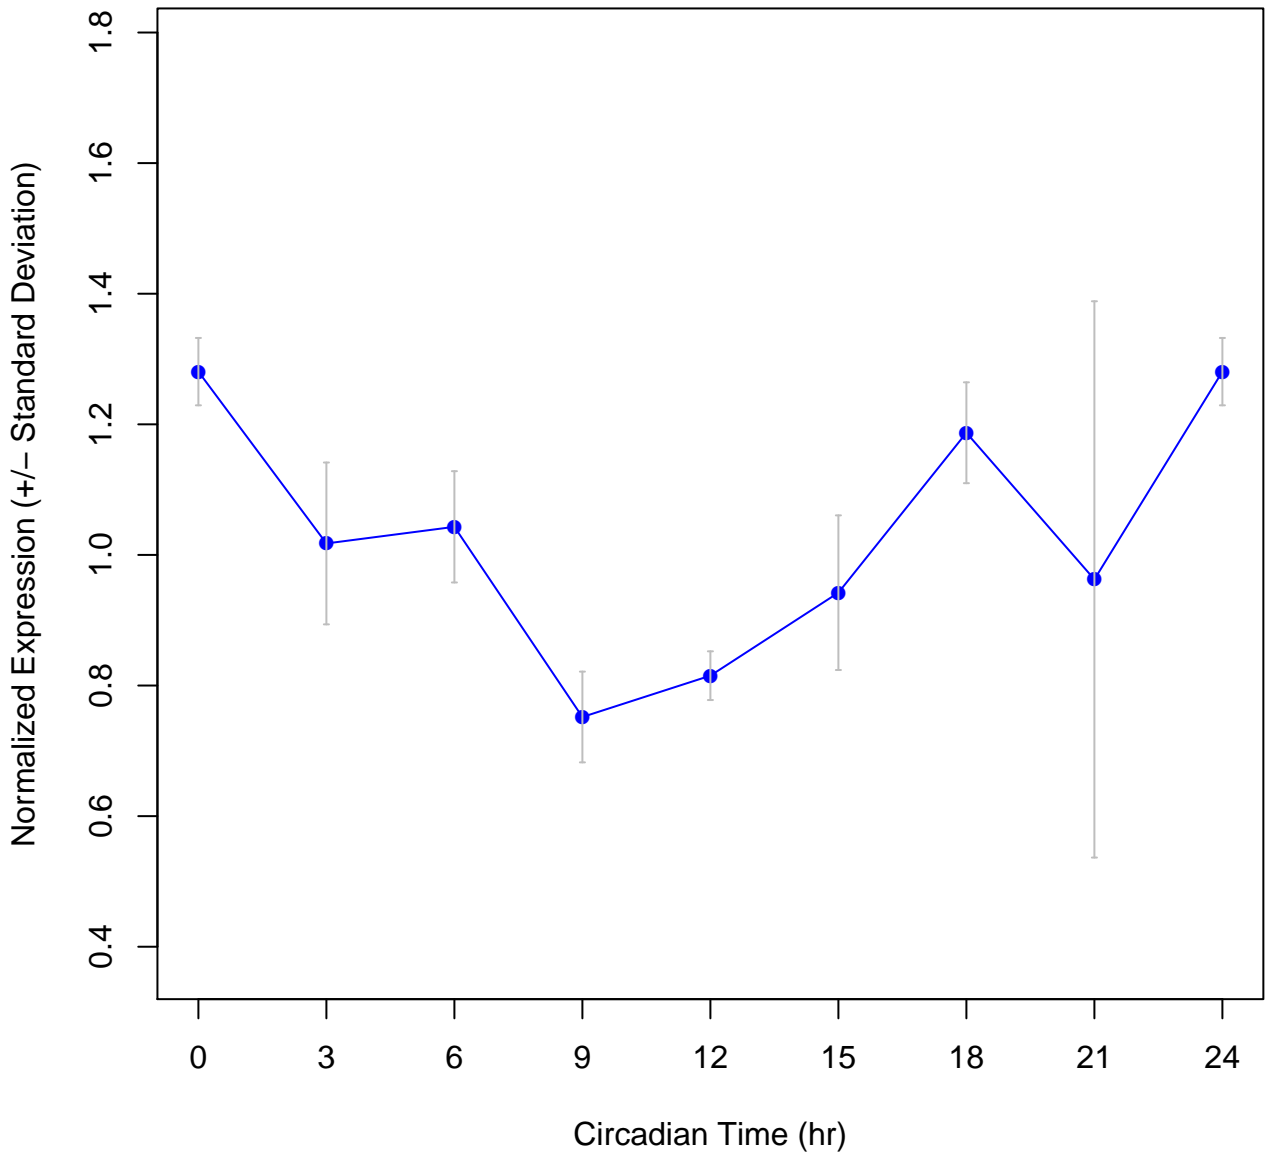

Supplement Figure 3 si\_ch211-114i13.12

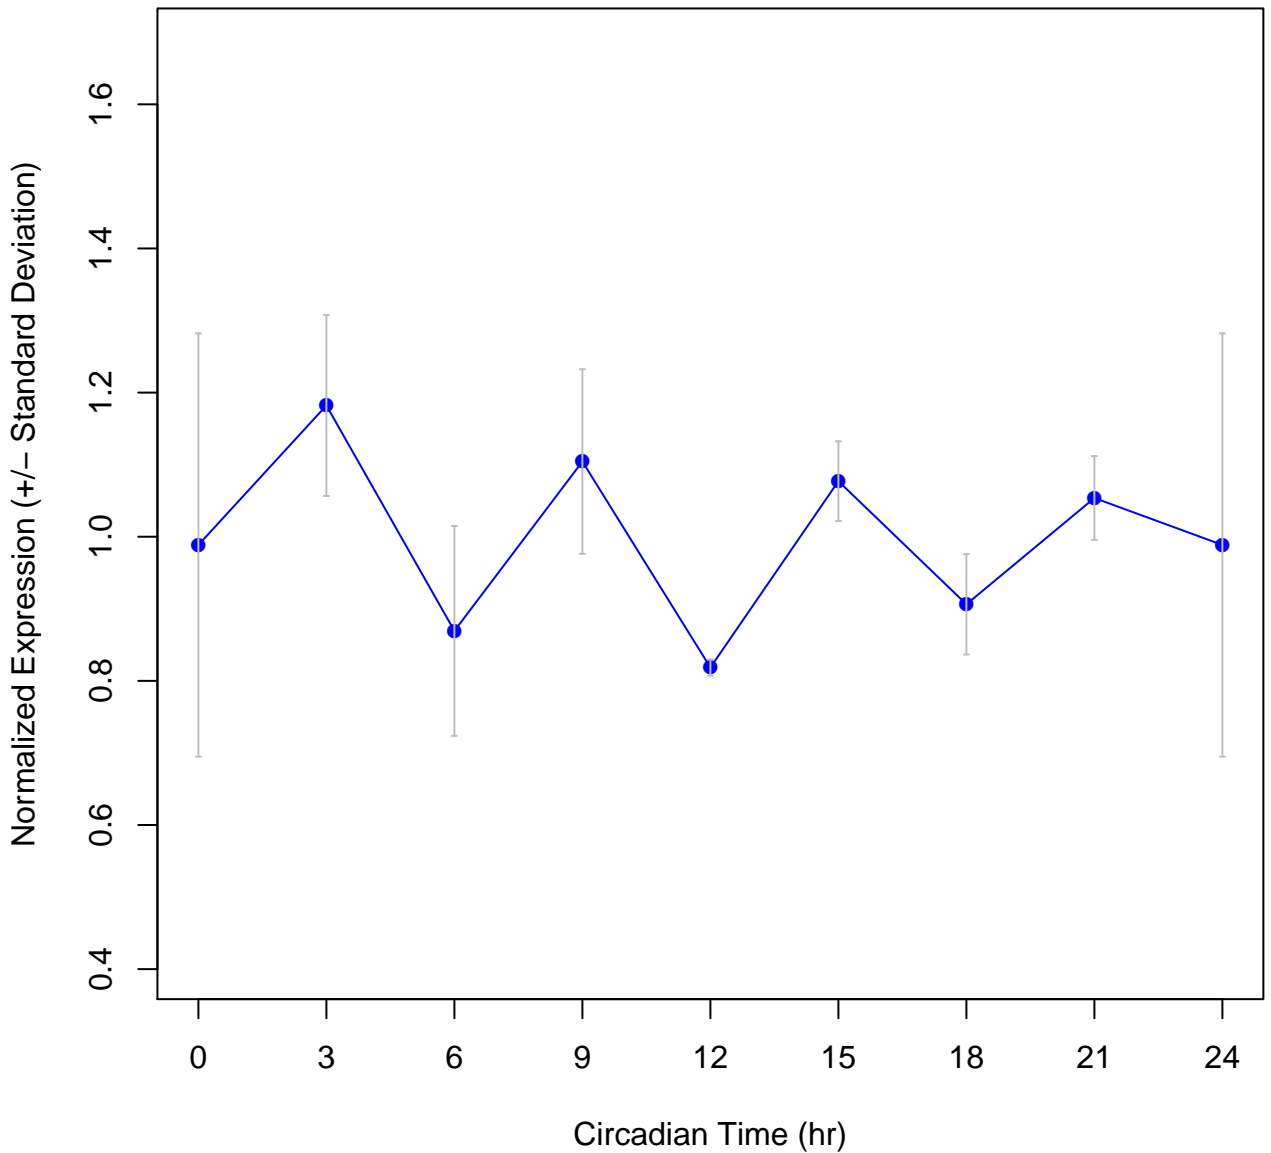



Supplement Figure 3 si\_ch211-199o1.2

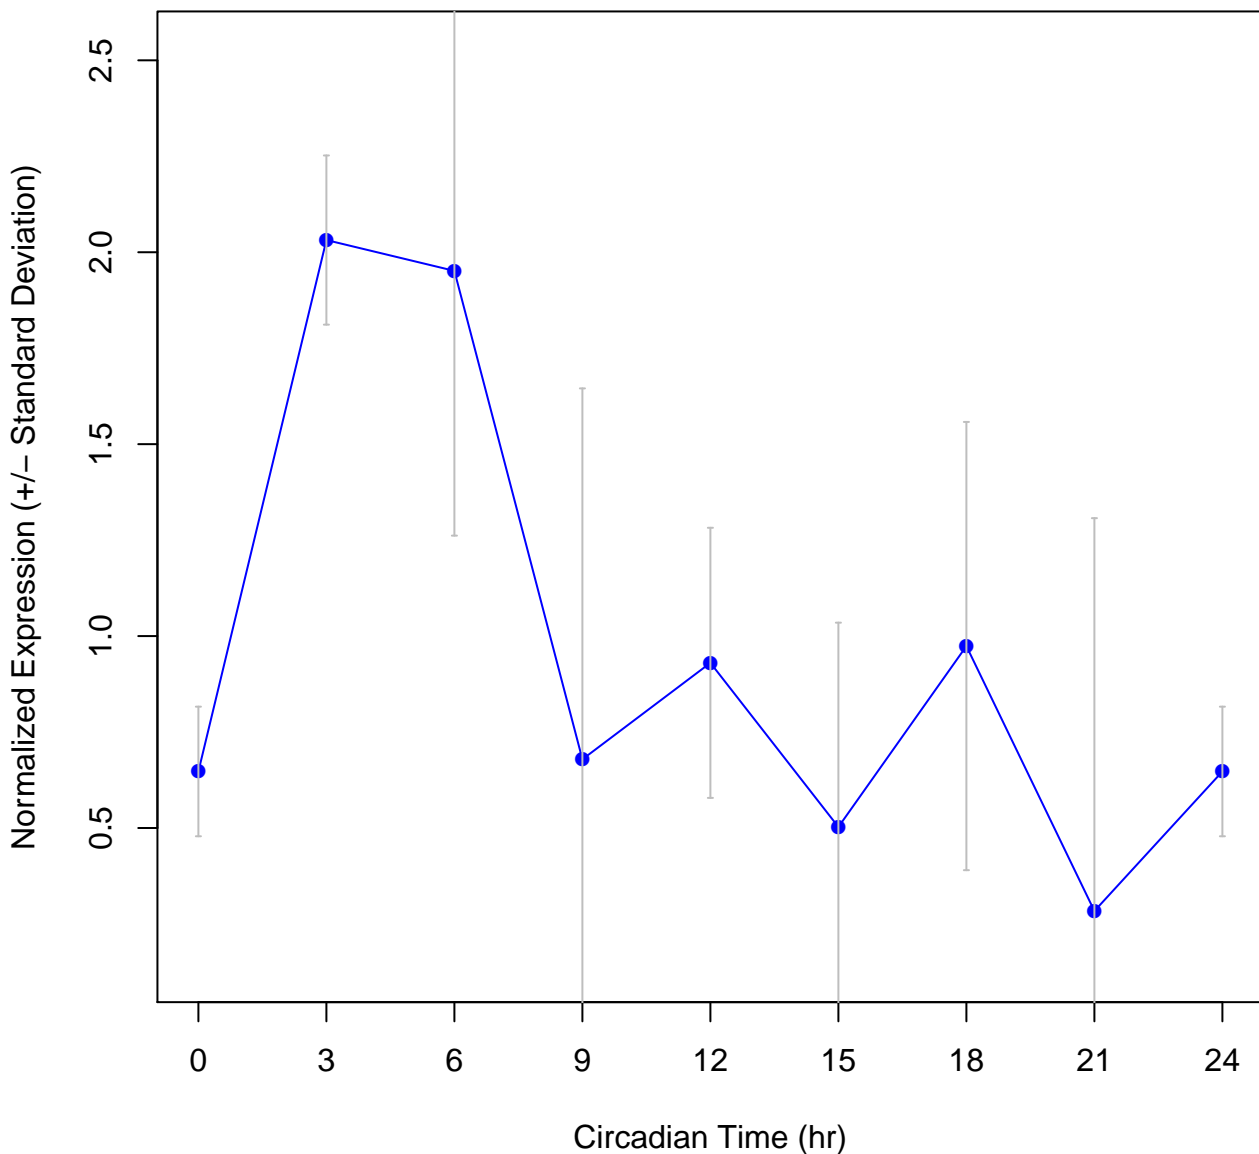

### Supplement Figure 3 sigirr

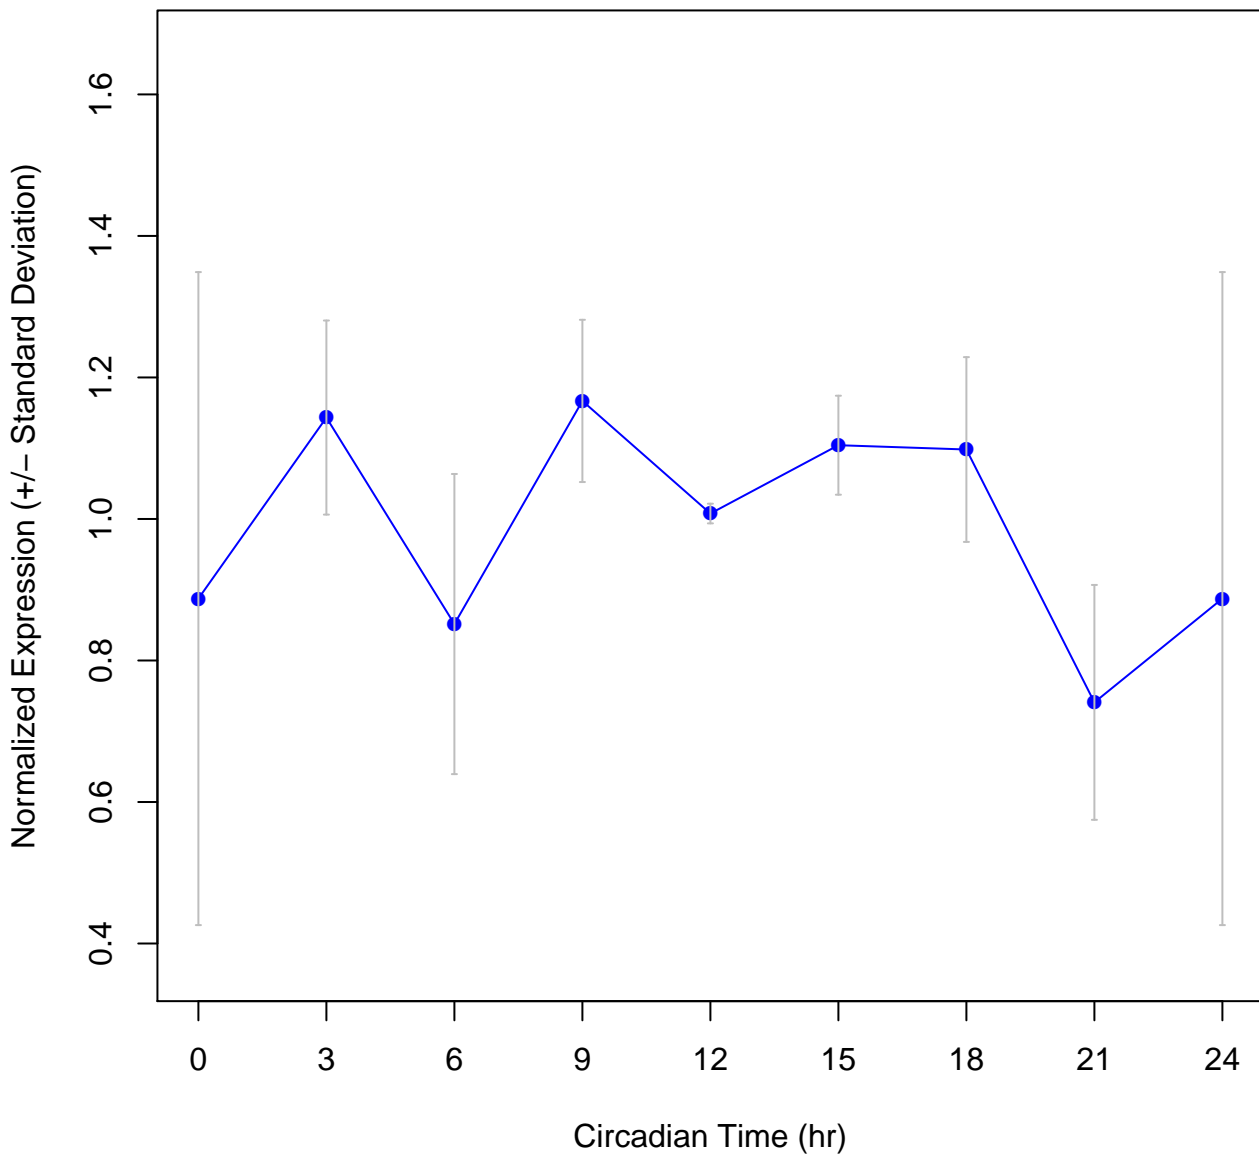

### Supplement Figure 3 sirt1

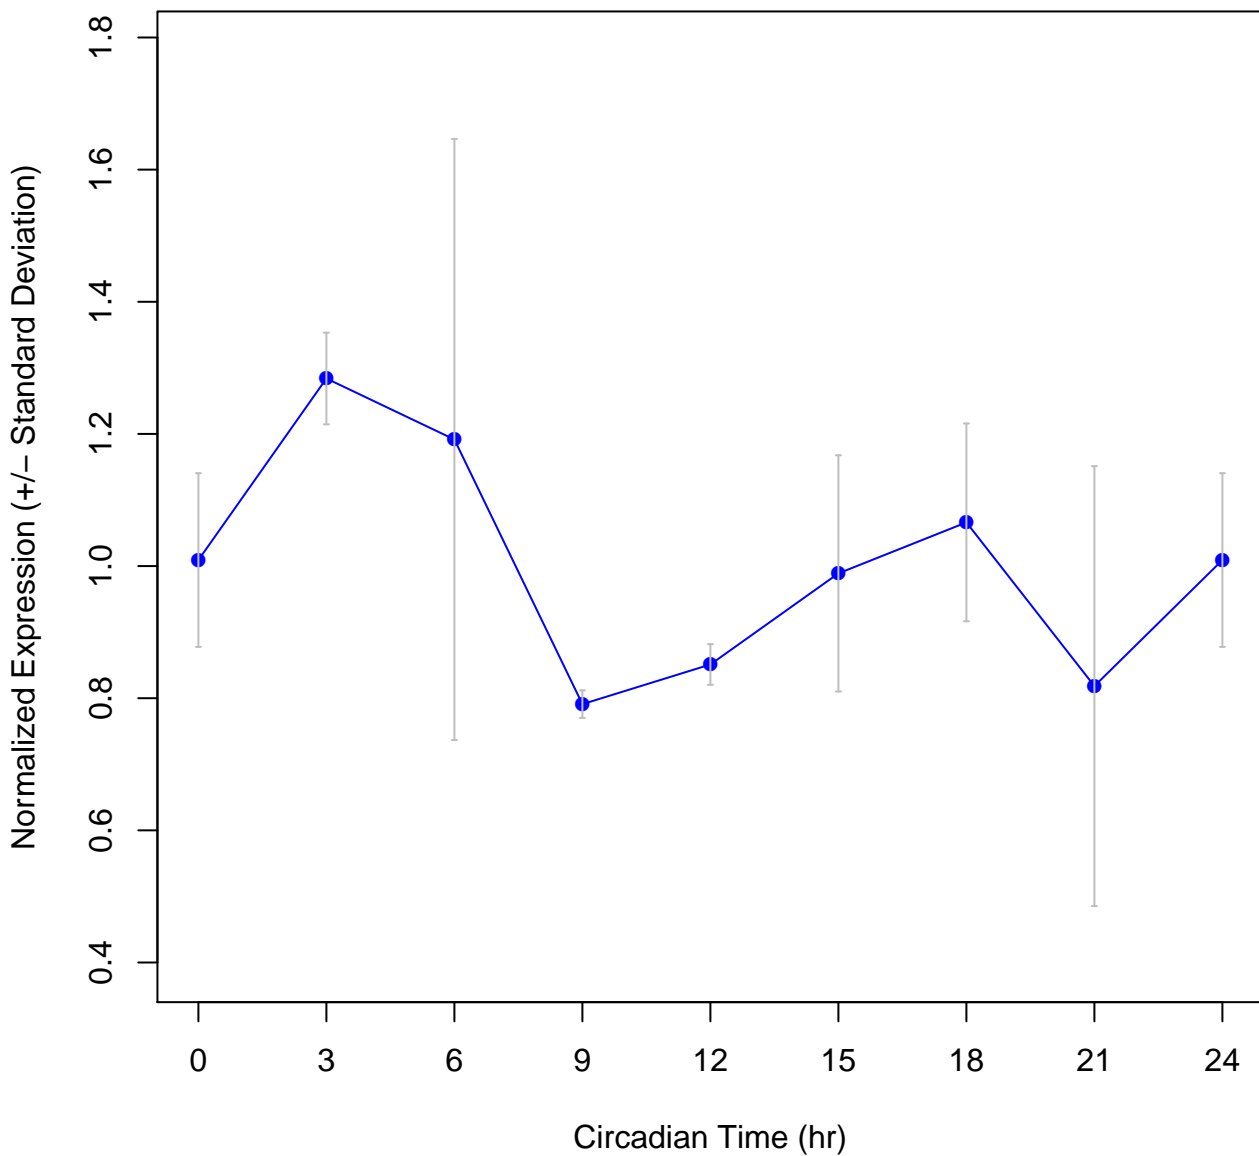

**Supplement Figure 3 six3**

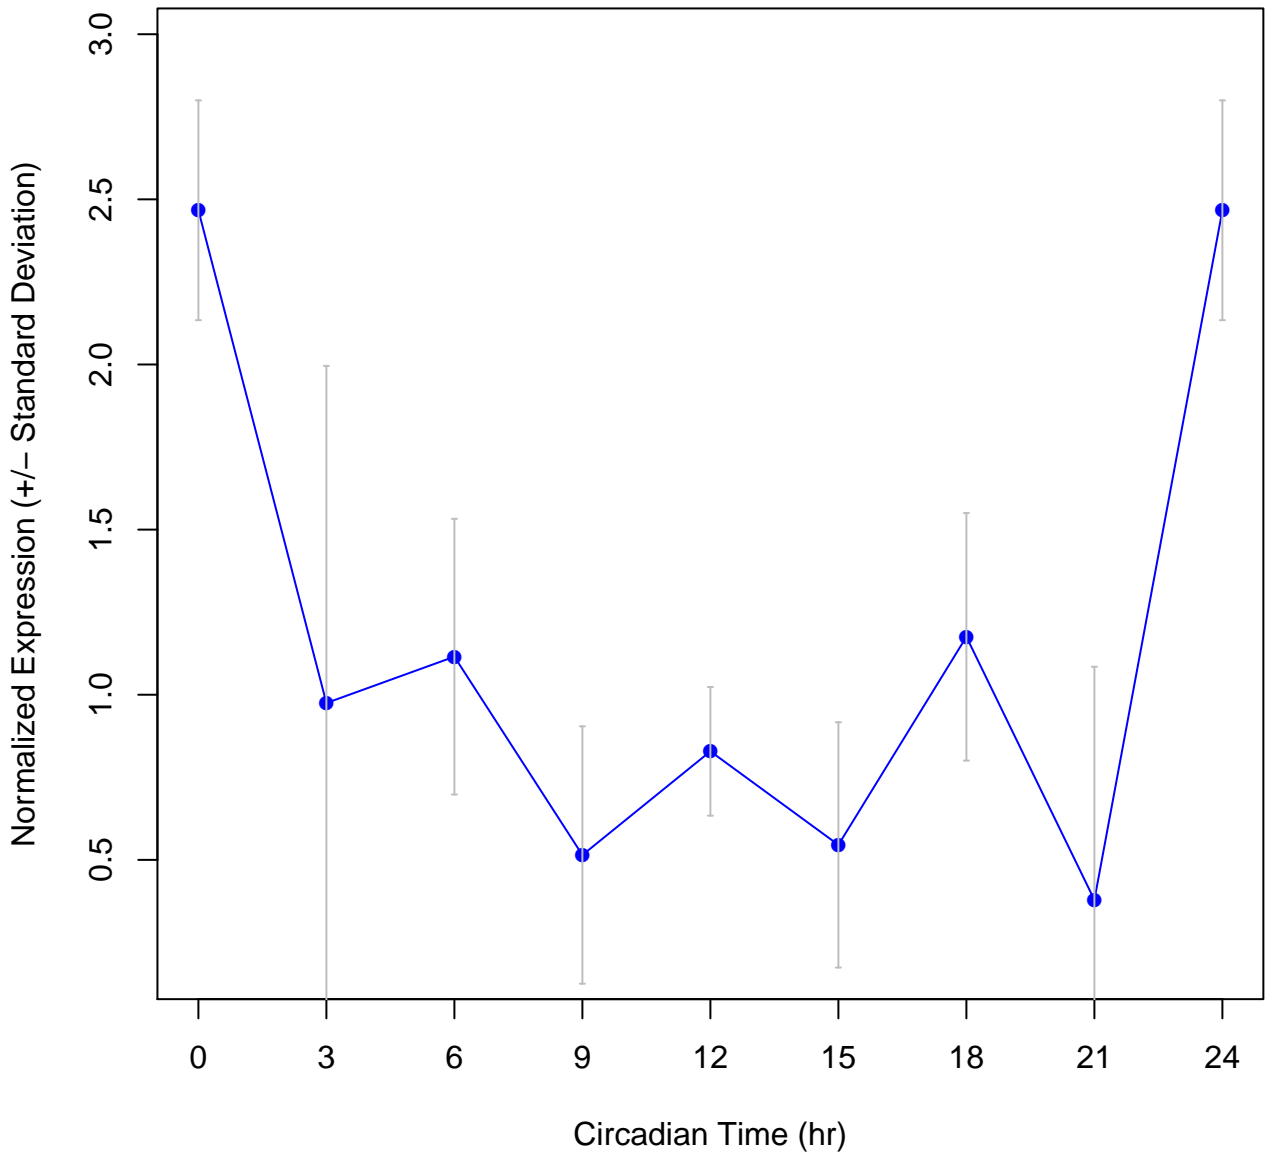

### Supplement Figure 3 skp1

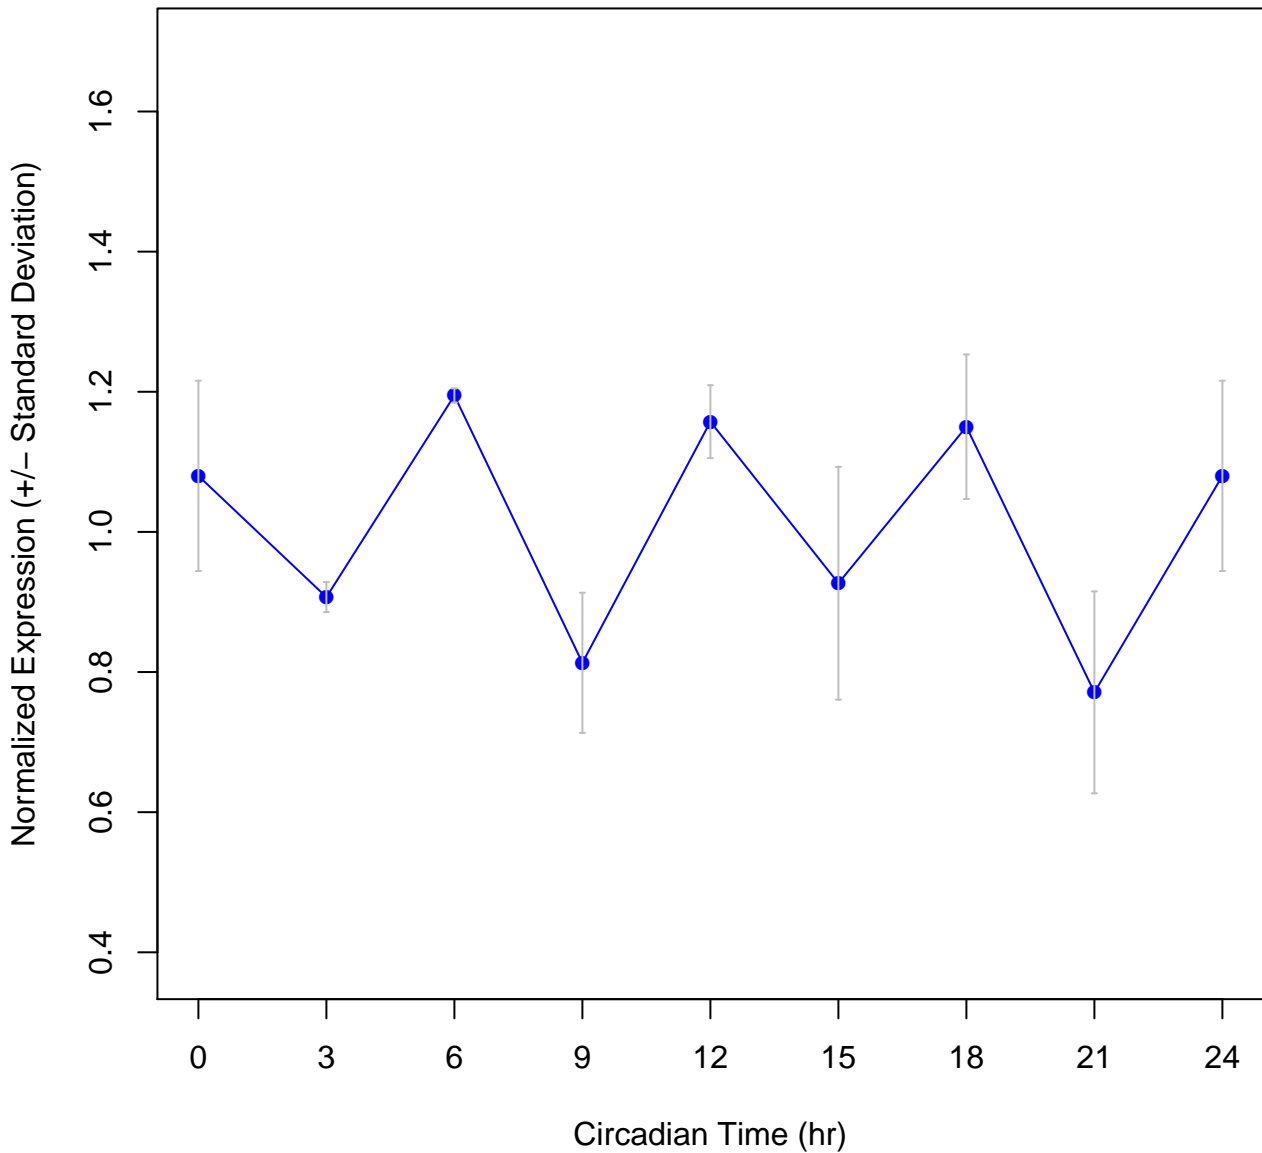

Supplement Figure 3 slc2a4

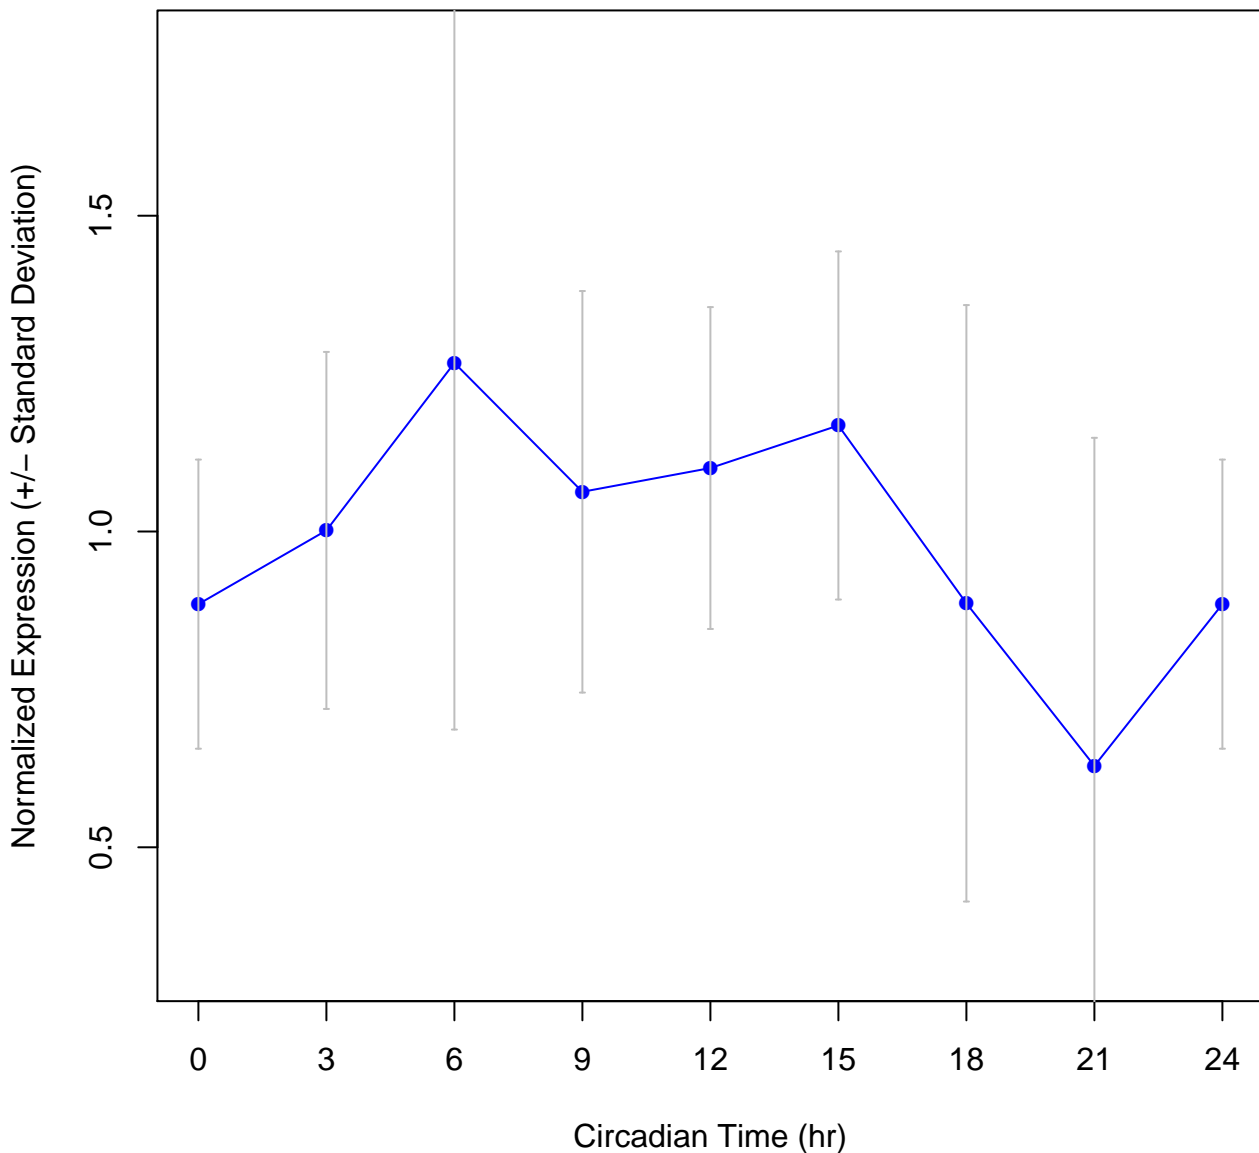

Supplement Figure 3 slc2a4rg

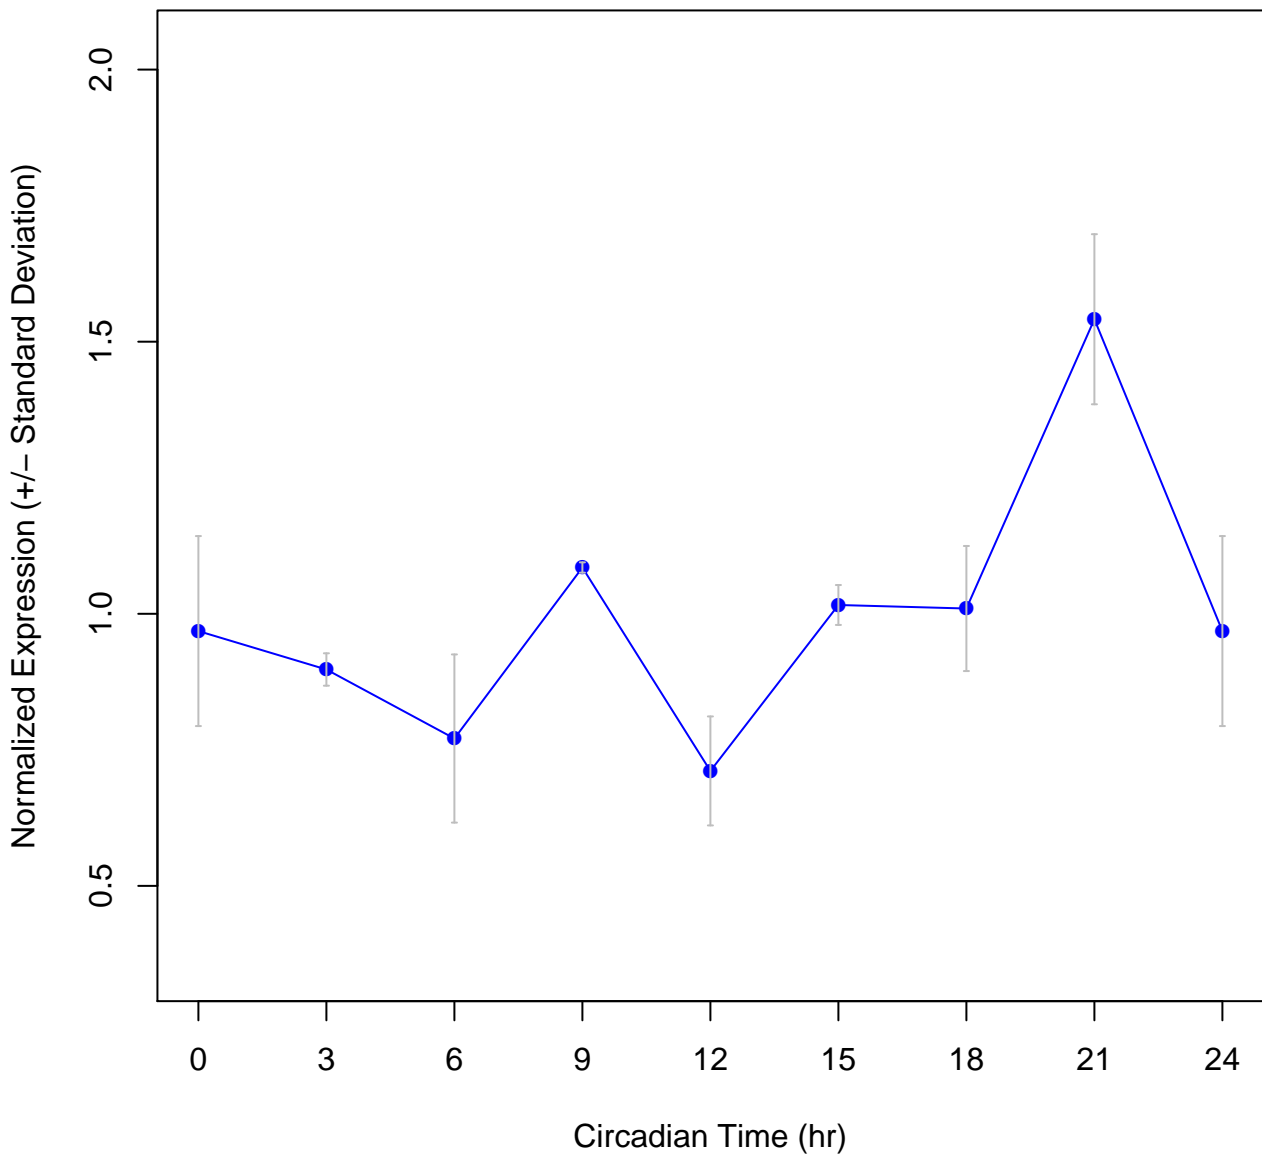

Supplement Figure 3 snca

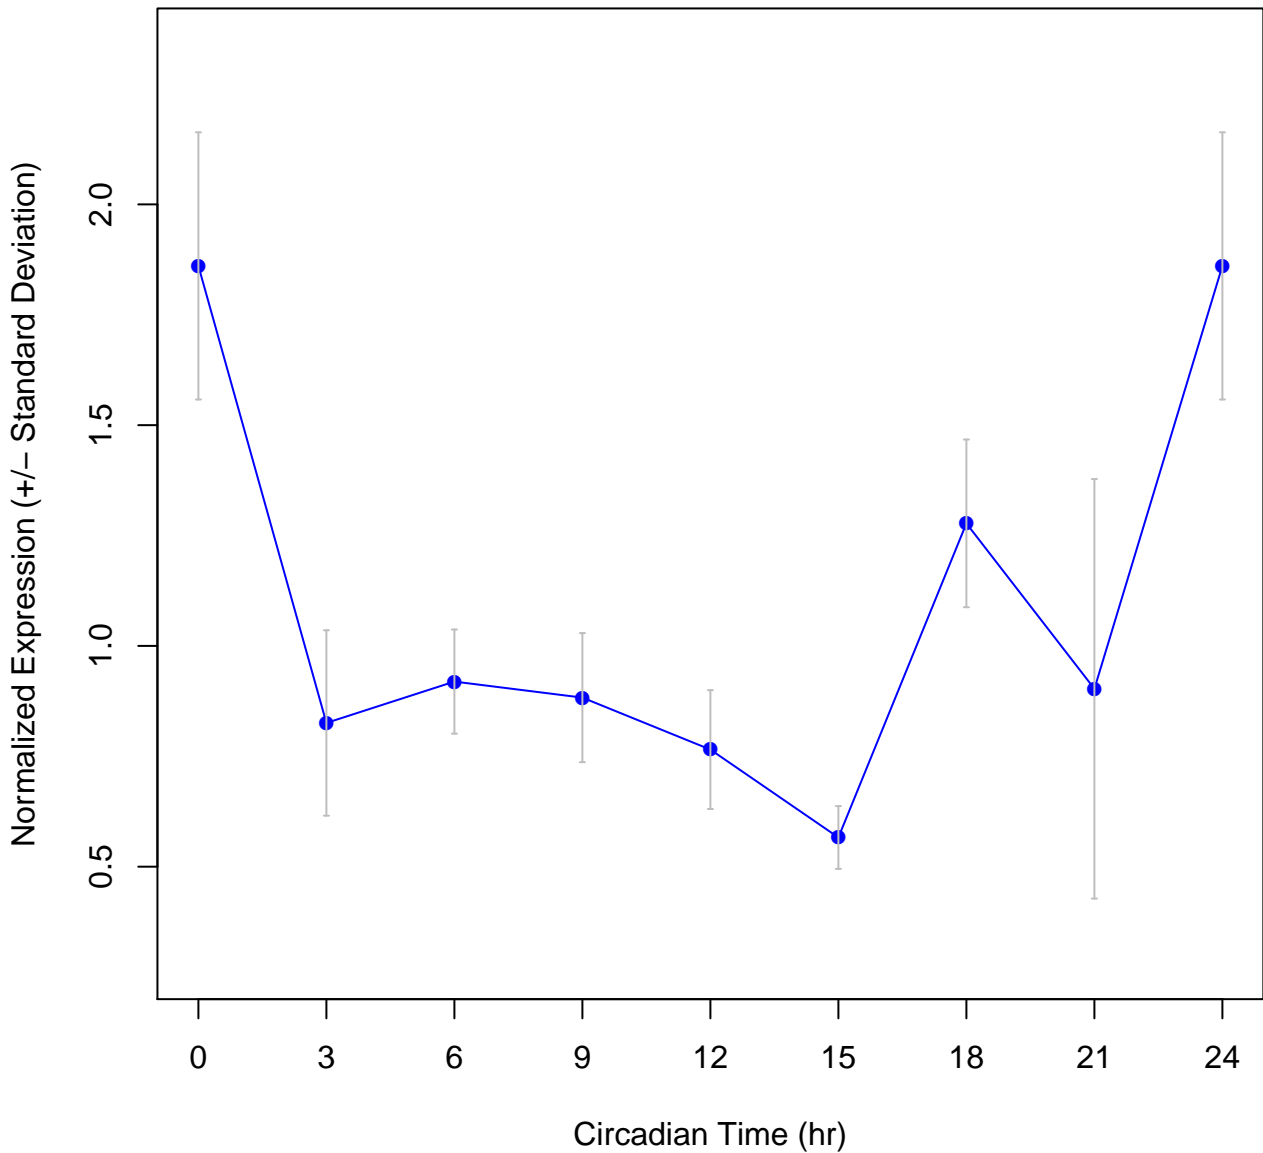



### Supplement Figure 3 sort1

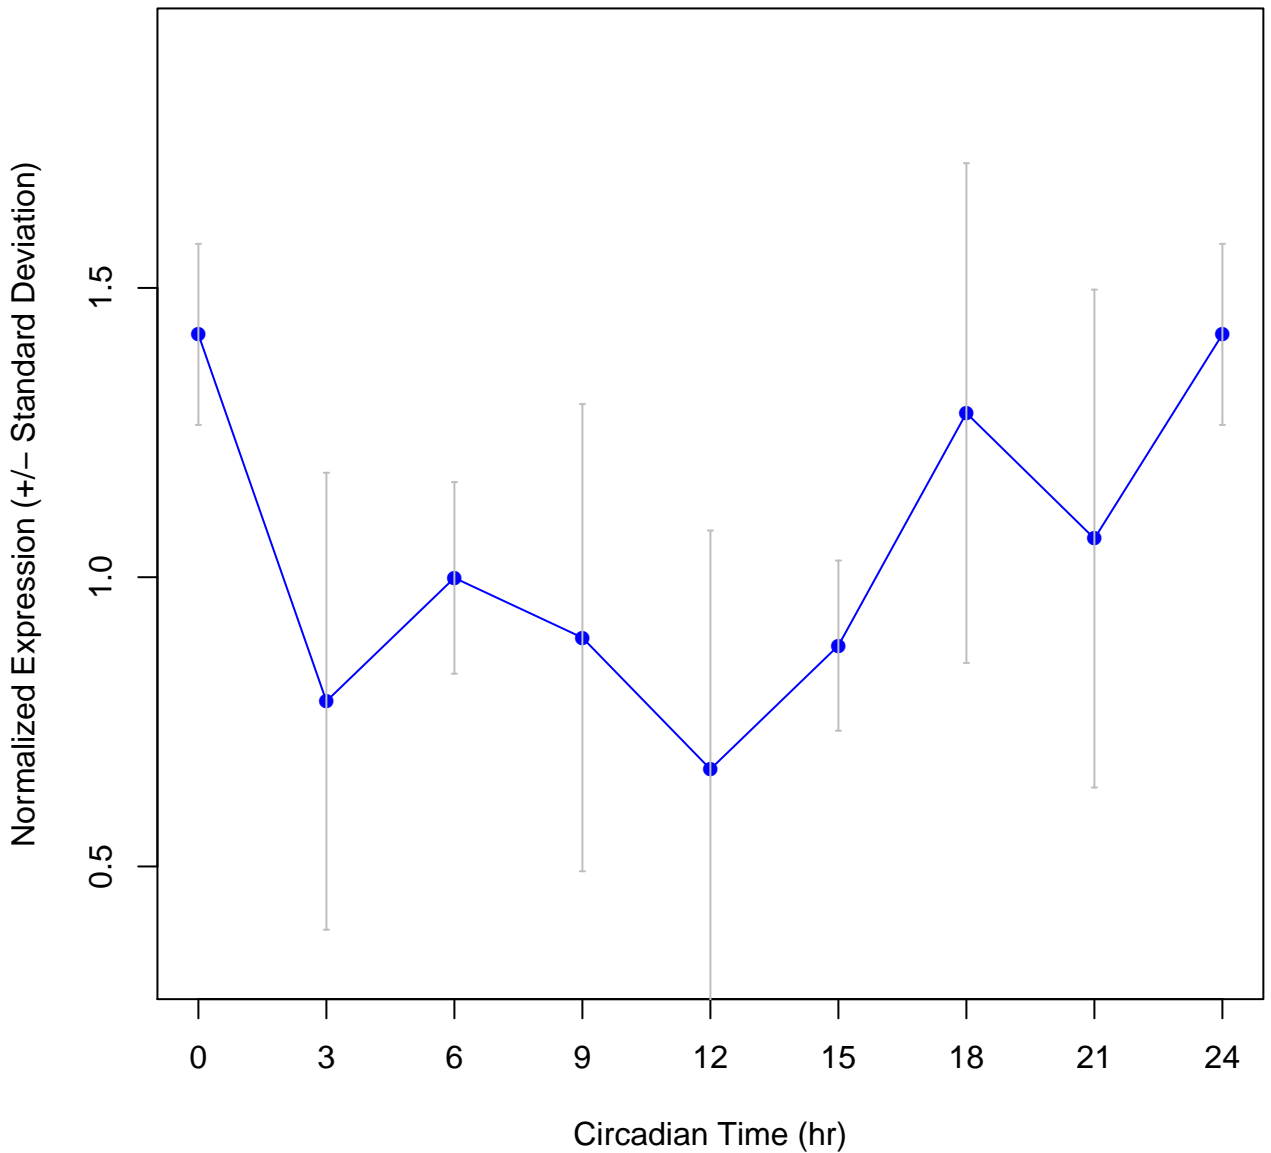

**Supplement Figure 3 sox10**

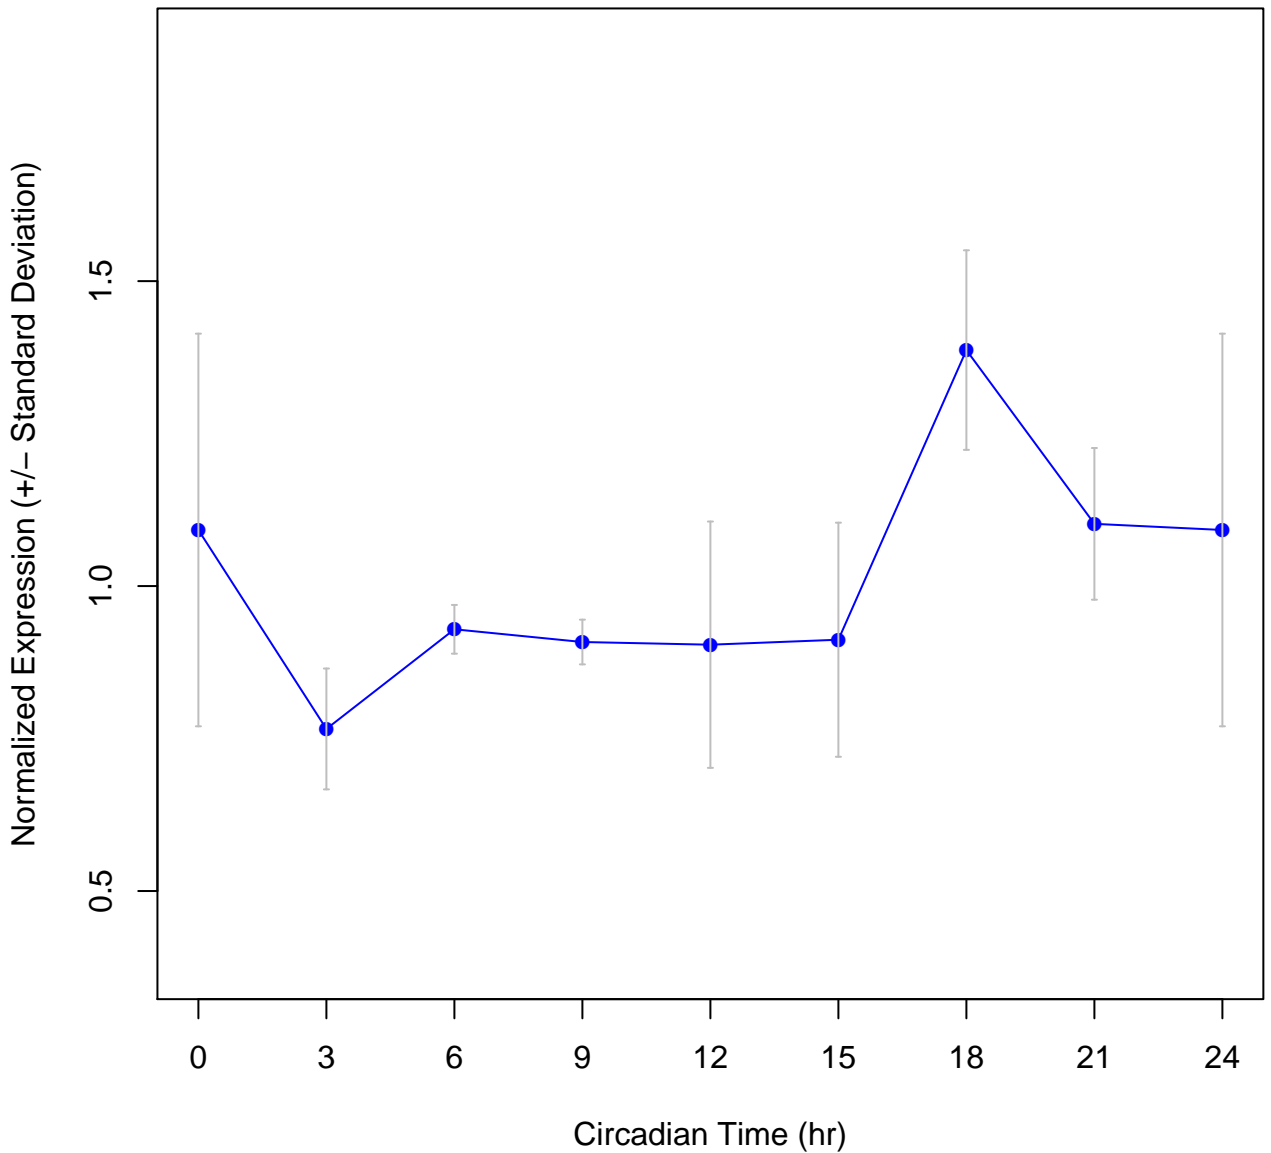

Supplement Figure 3 sox8

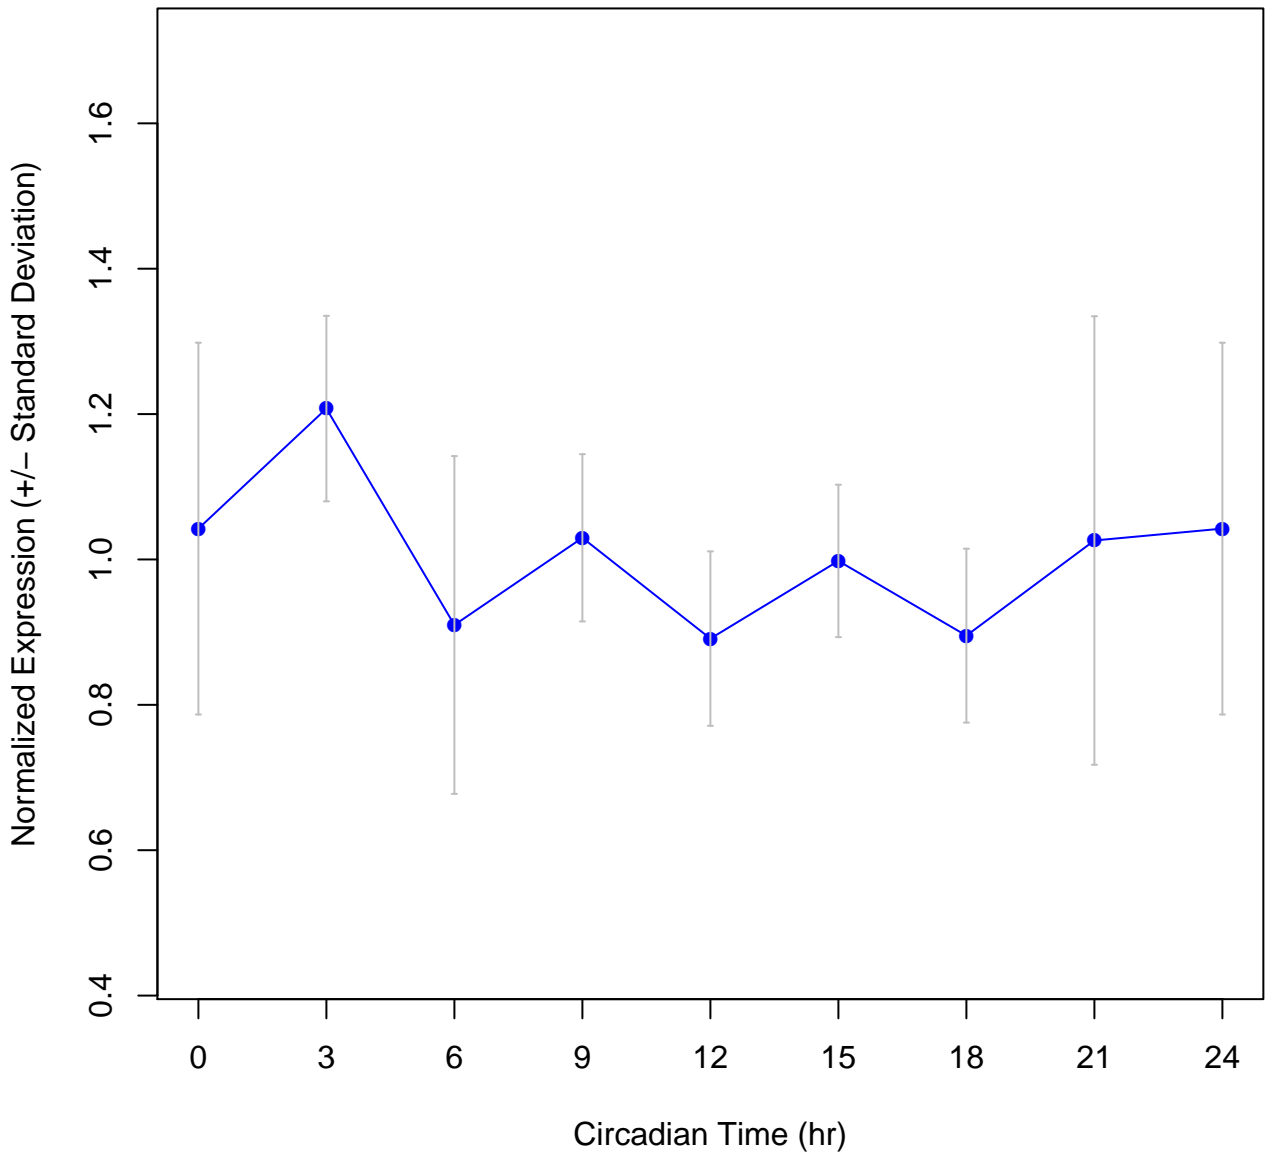

Supplement Figure 3 spc25

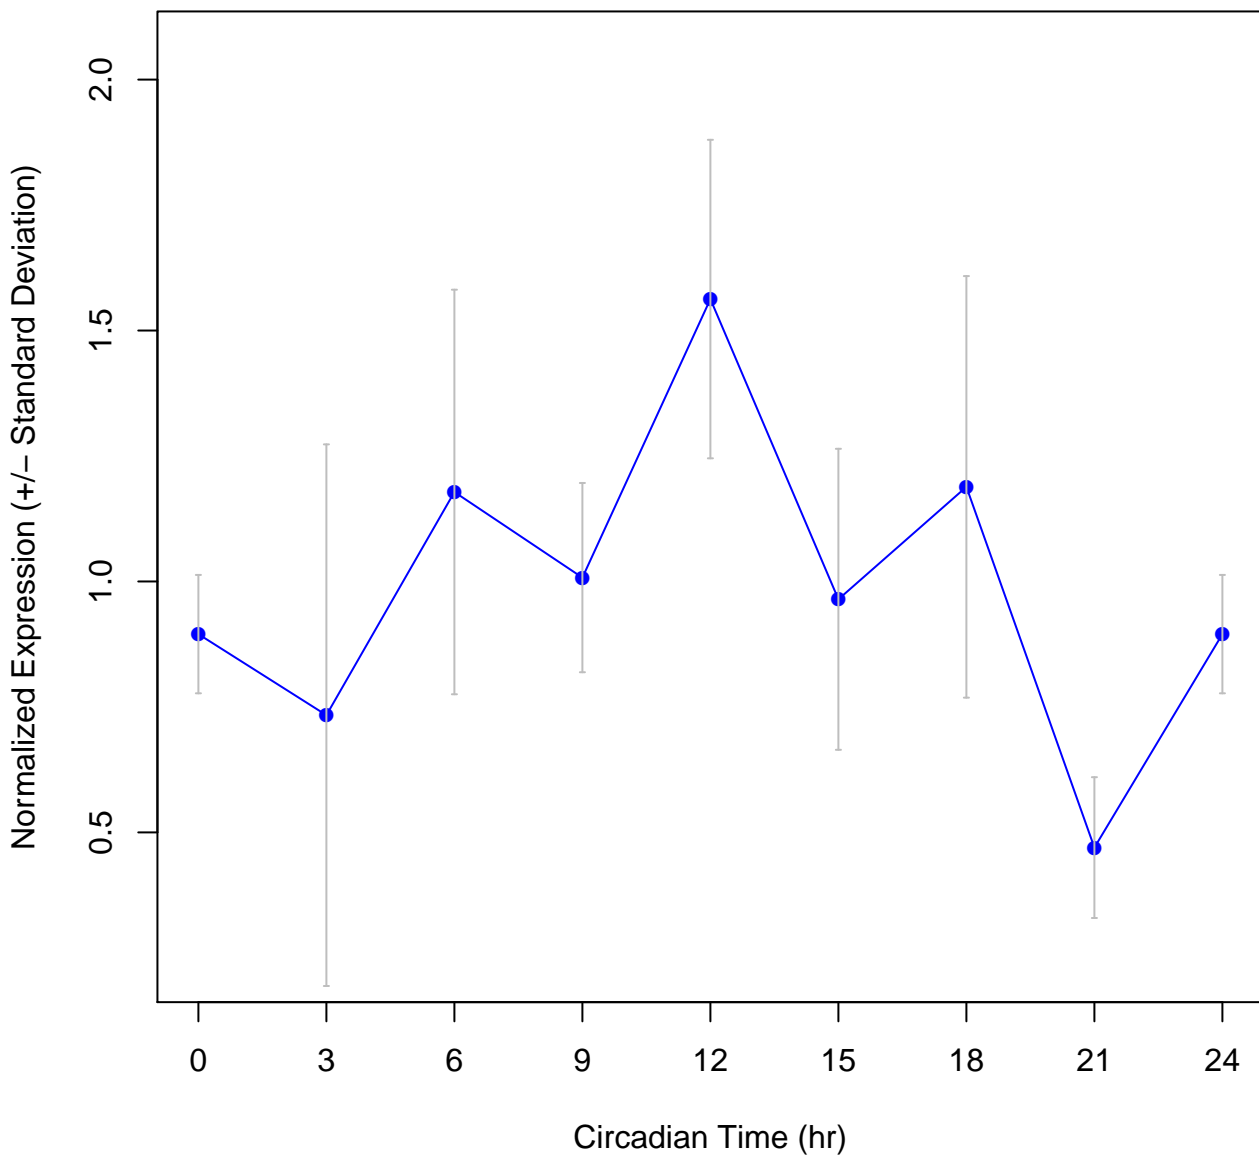

Supplement Figure 3 srebf1

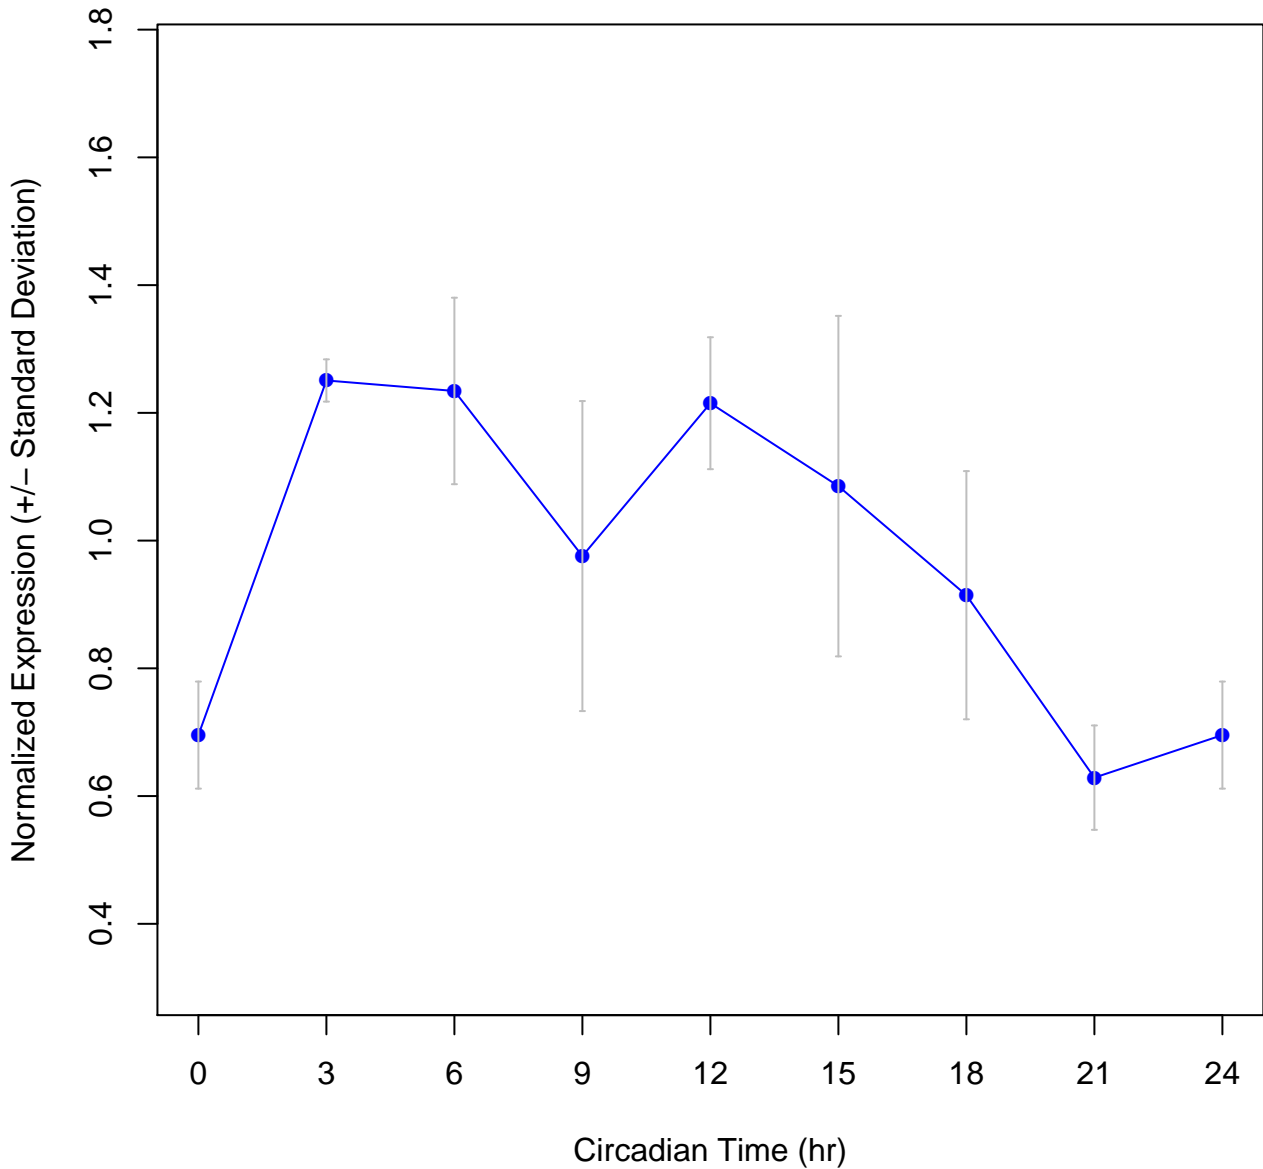

### Supplement Figure 3 sybu

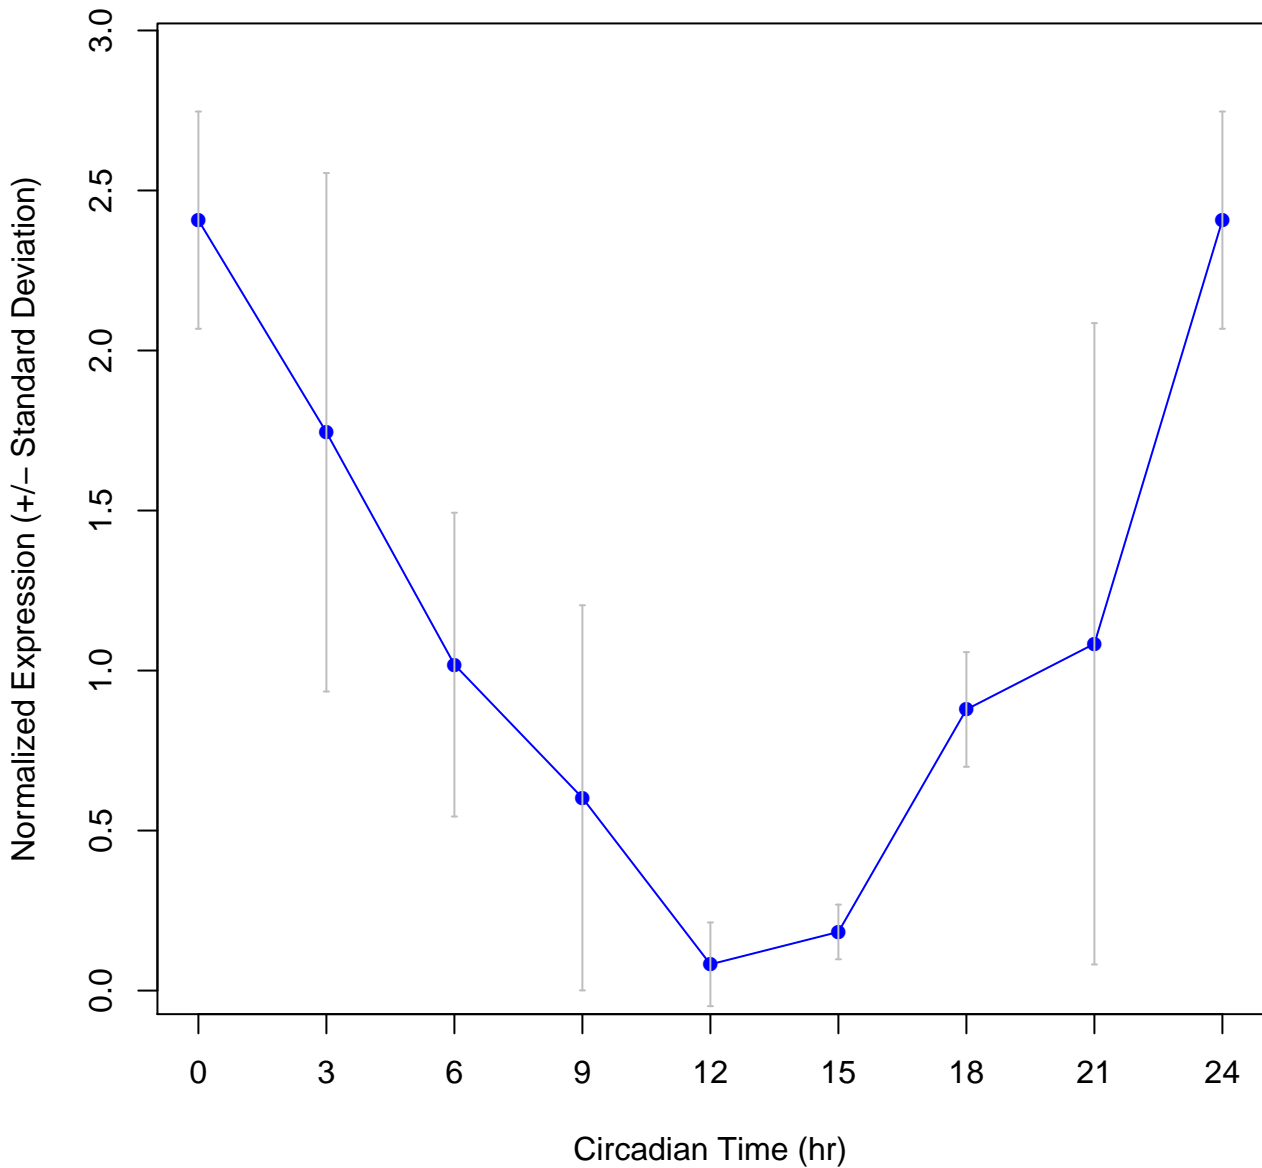

Supplement Figure 3 tgm8

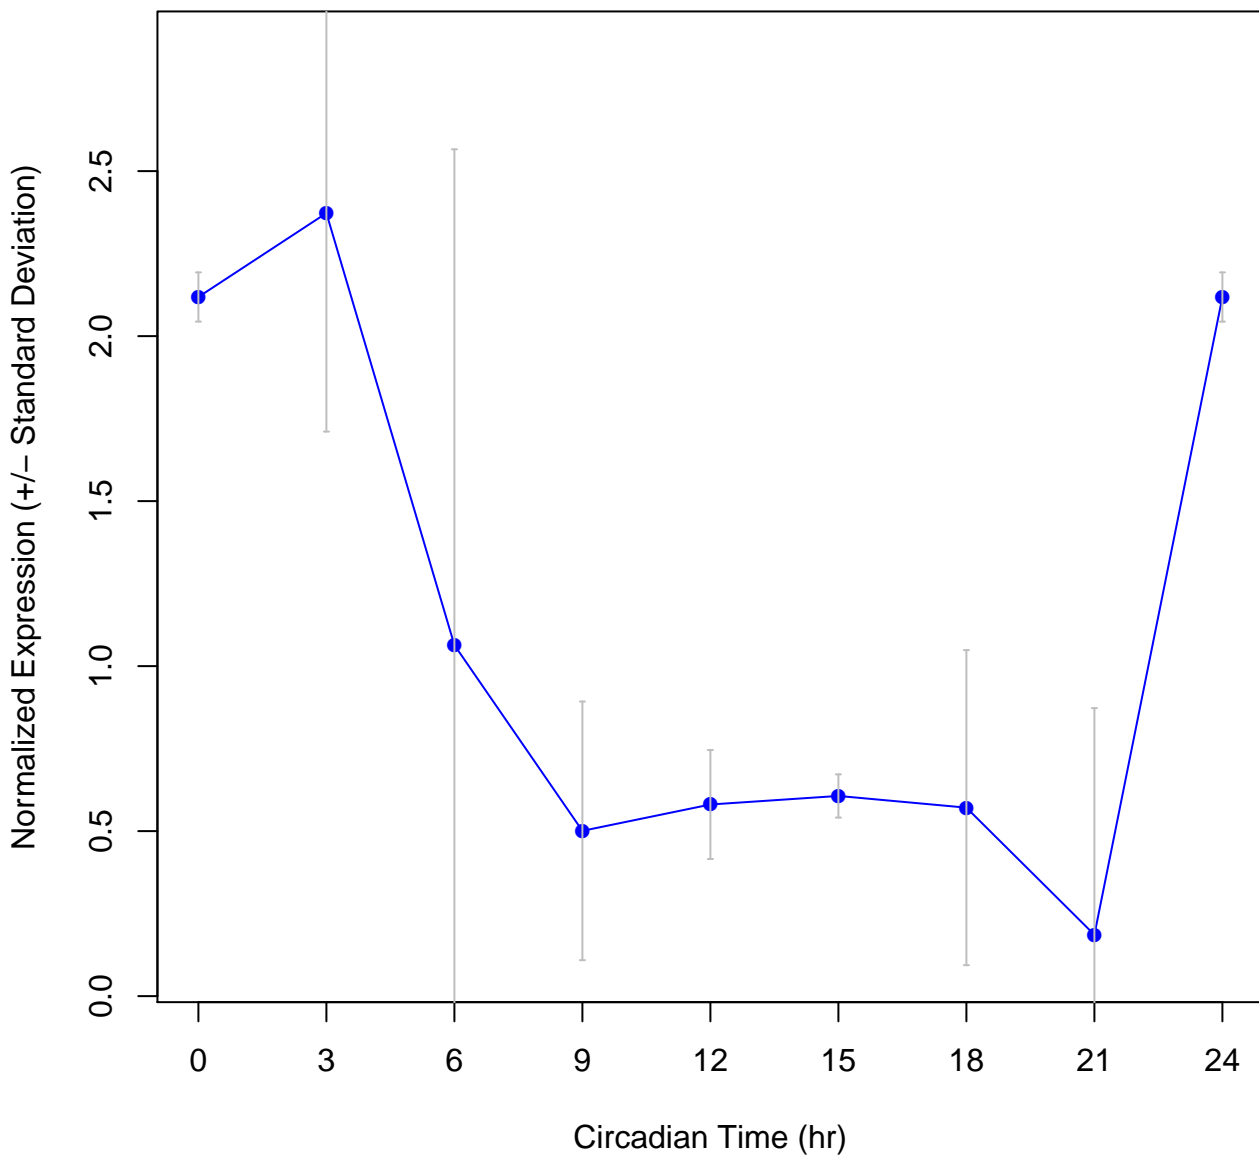

**Supplement Figure 3 thbs1**

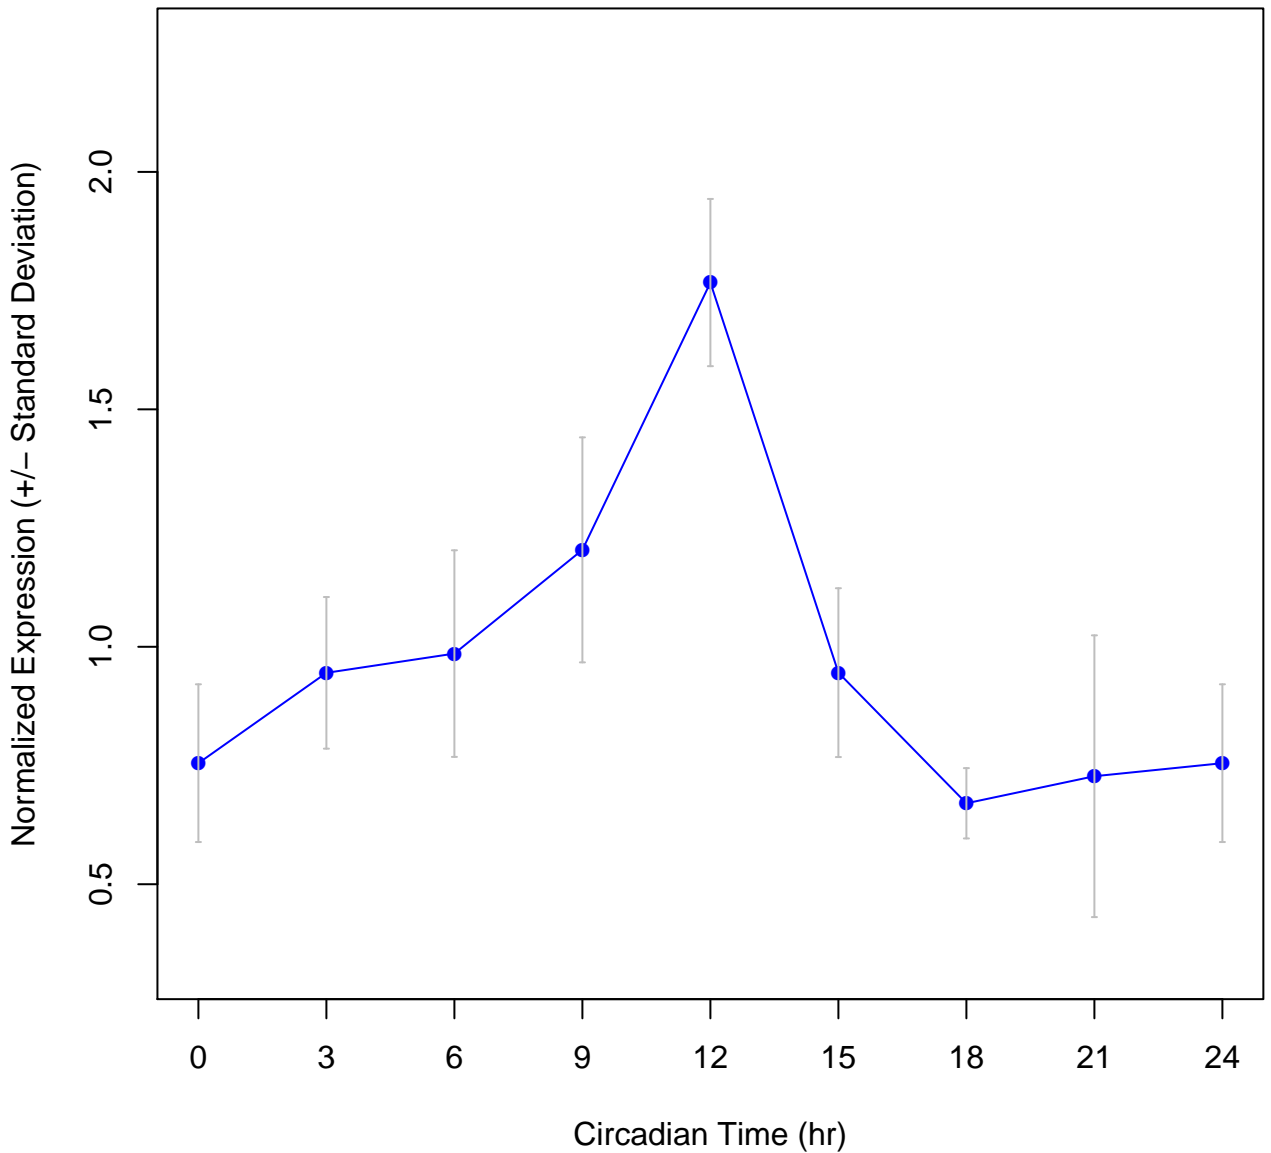



**Supplement Figure 3 tim1**

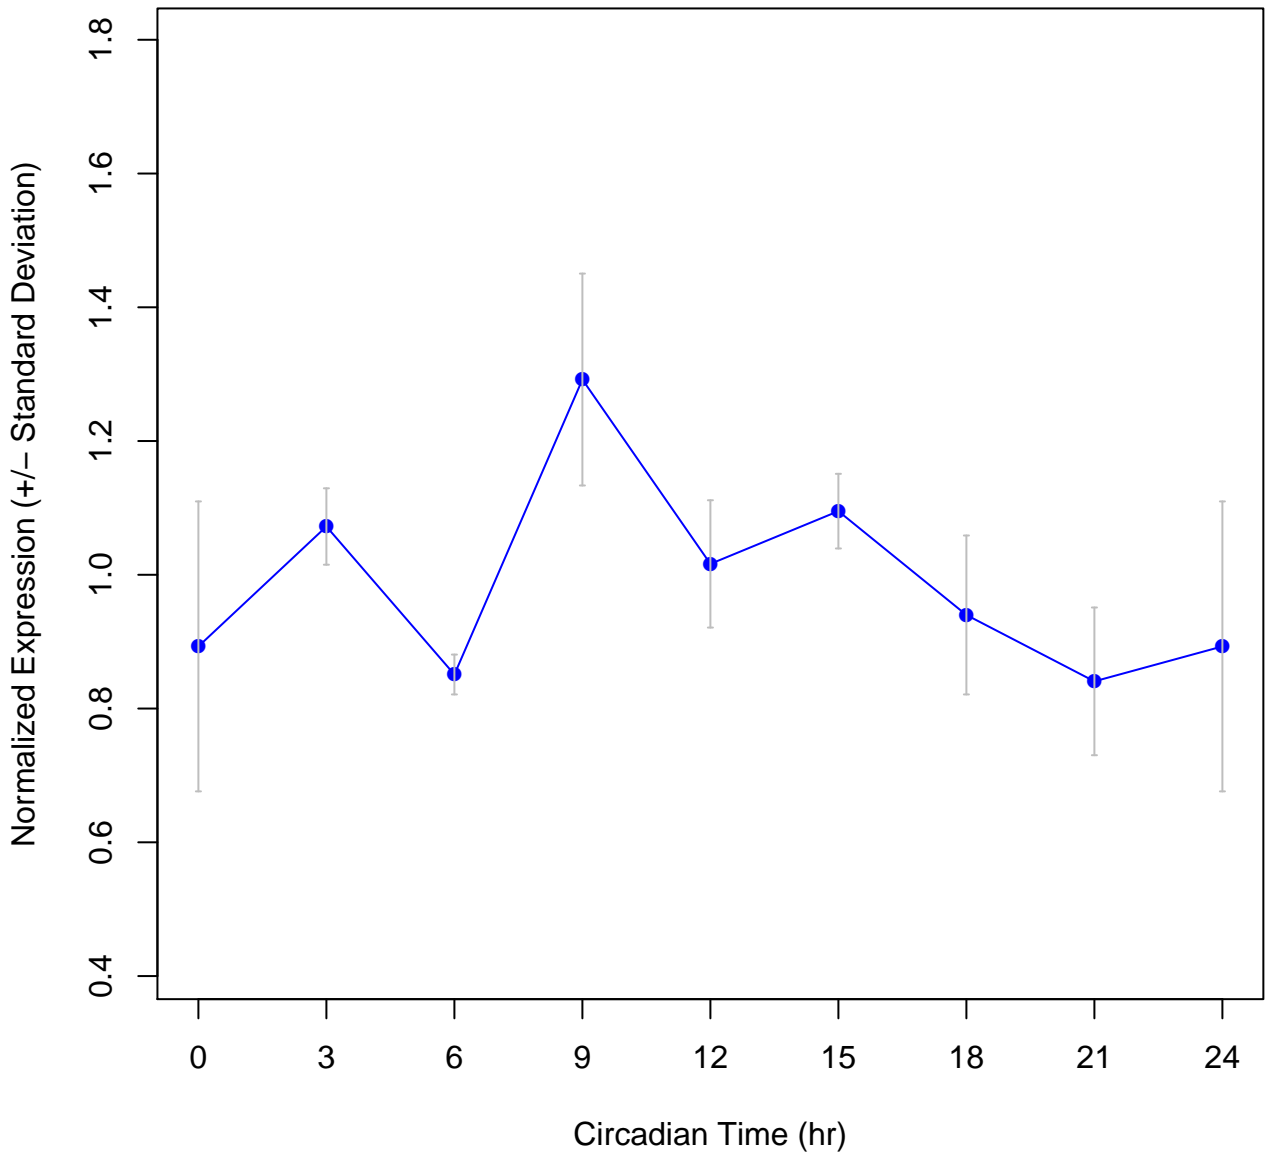

Supplement Figure 3 tmem204

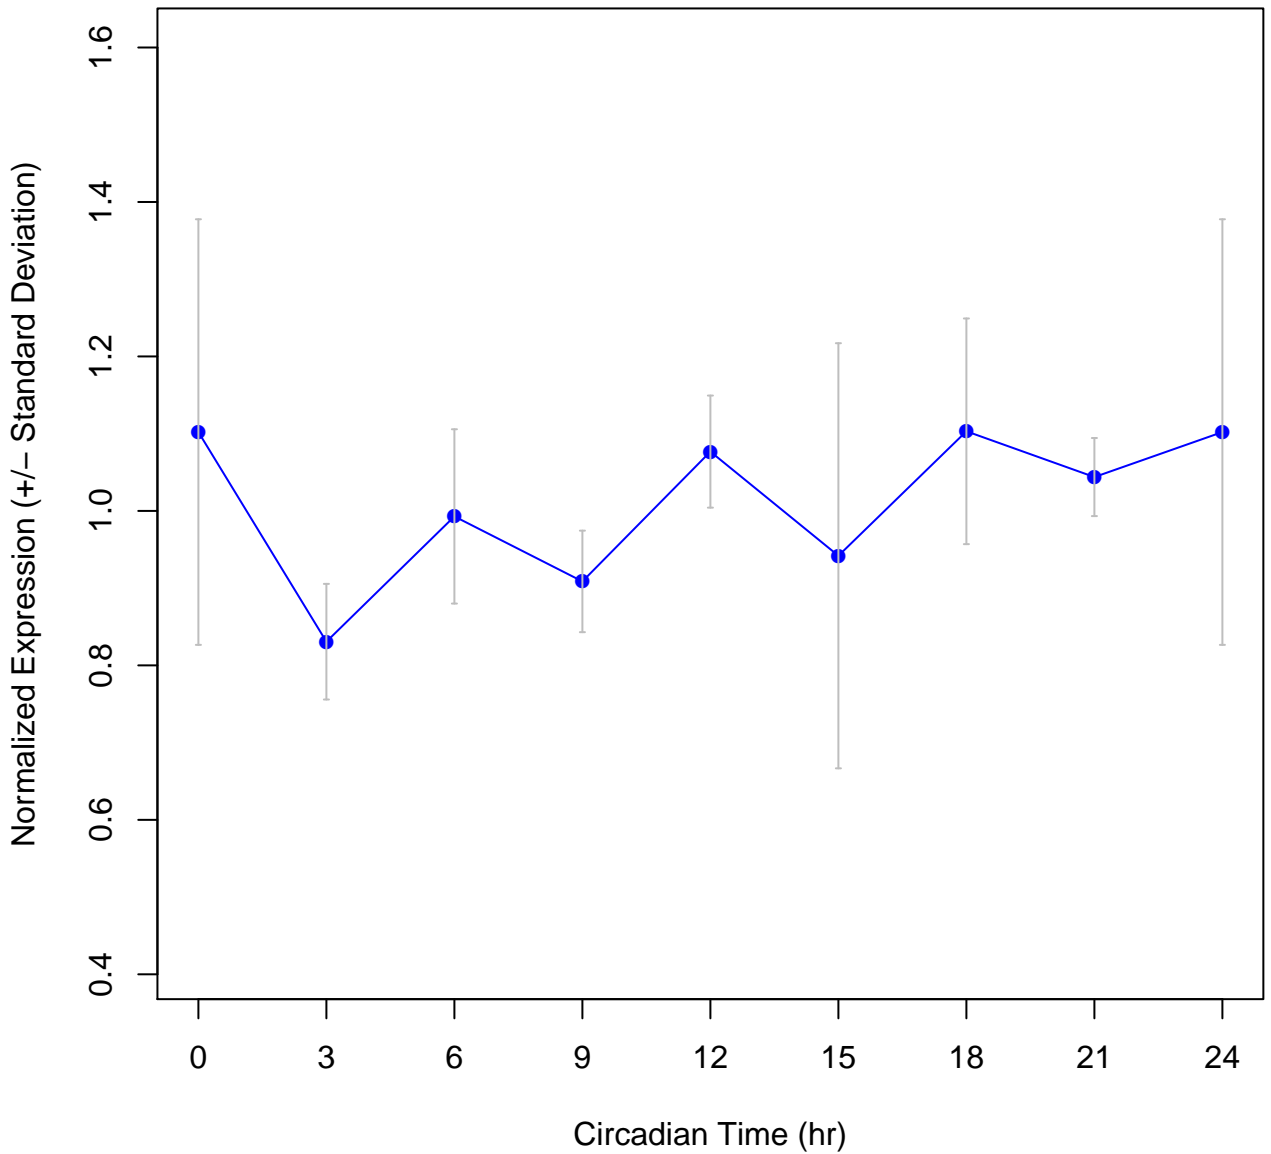

Supplement Figure 3 top2a

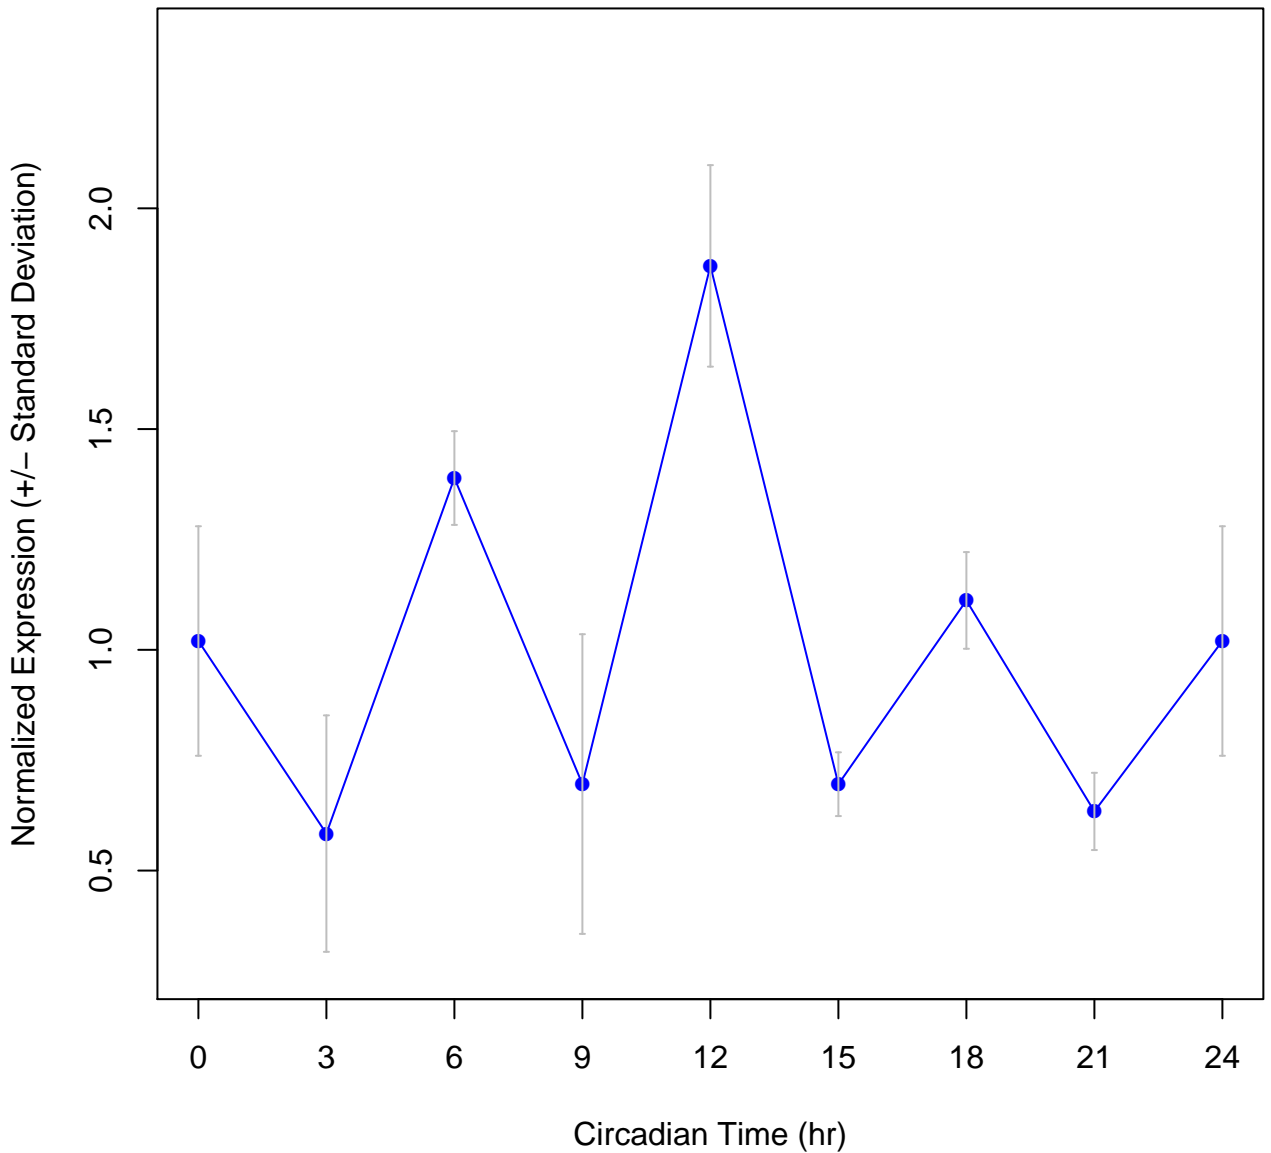

Supplement Figure 3 tpm4

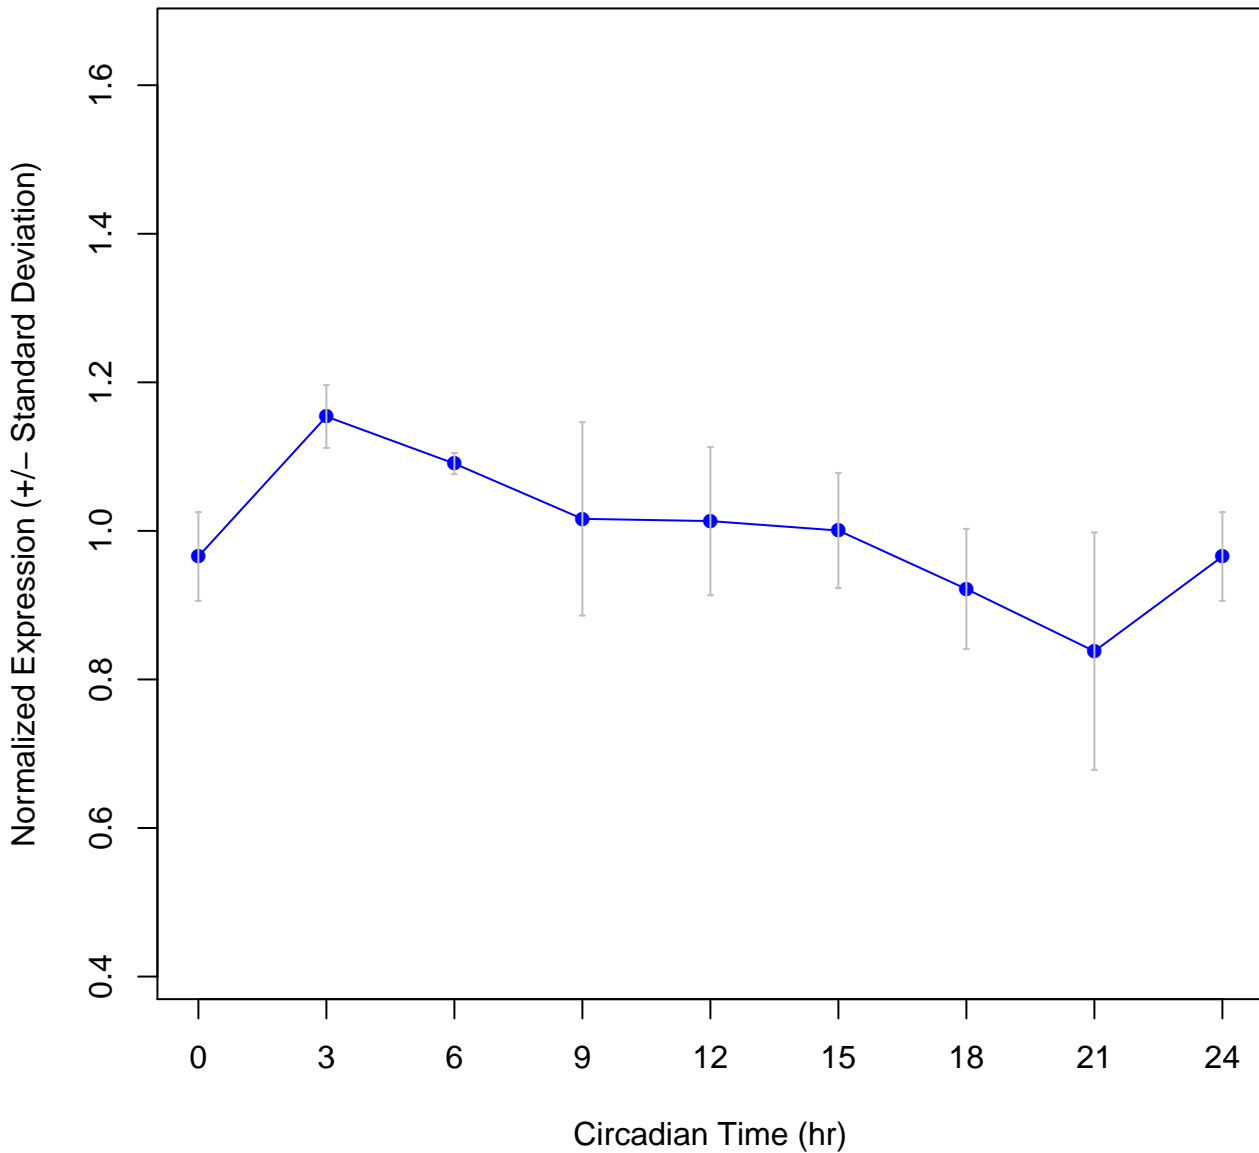

### Supplement Figure 3 tyr

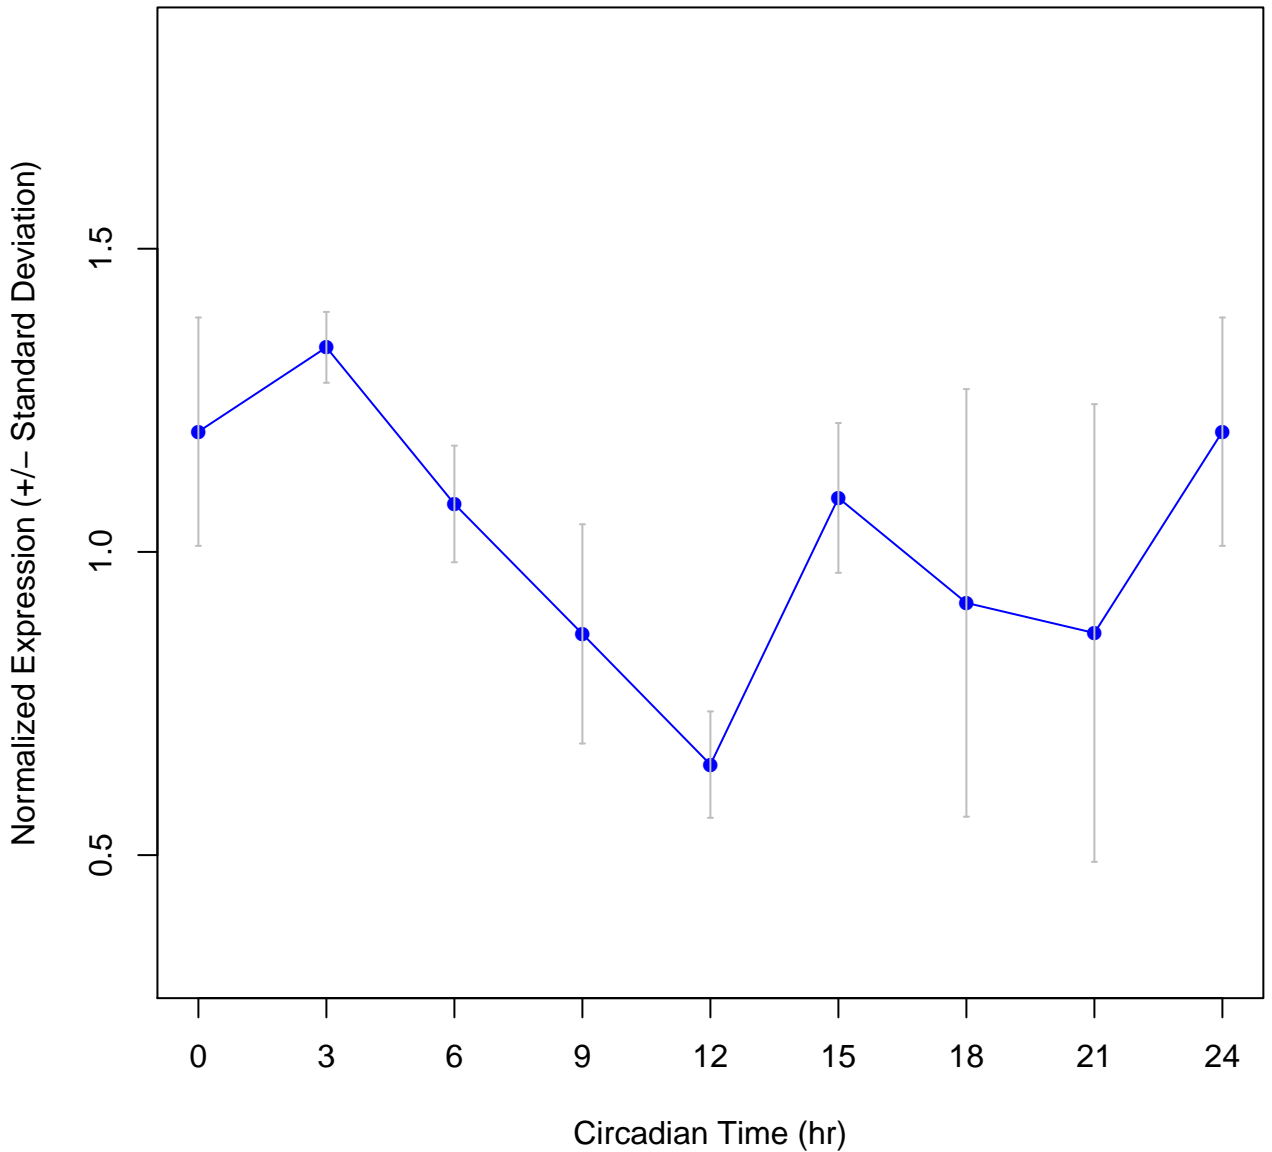

### Supplement Figure 3 tyrp1

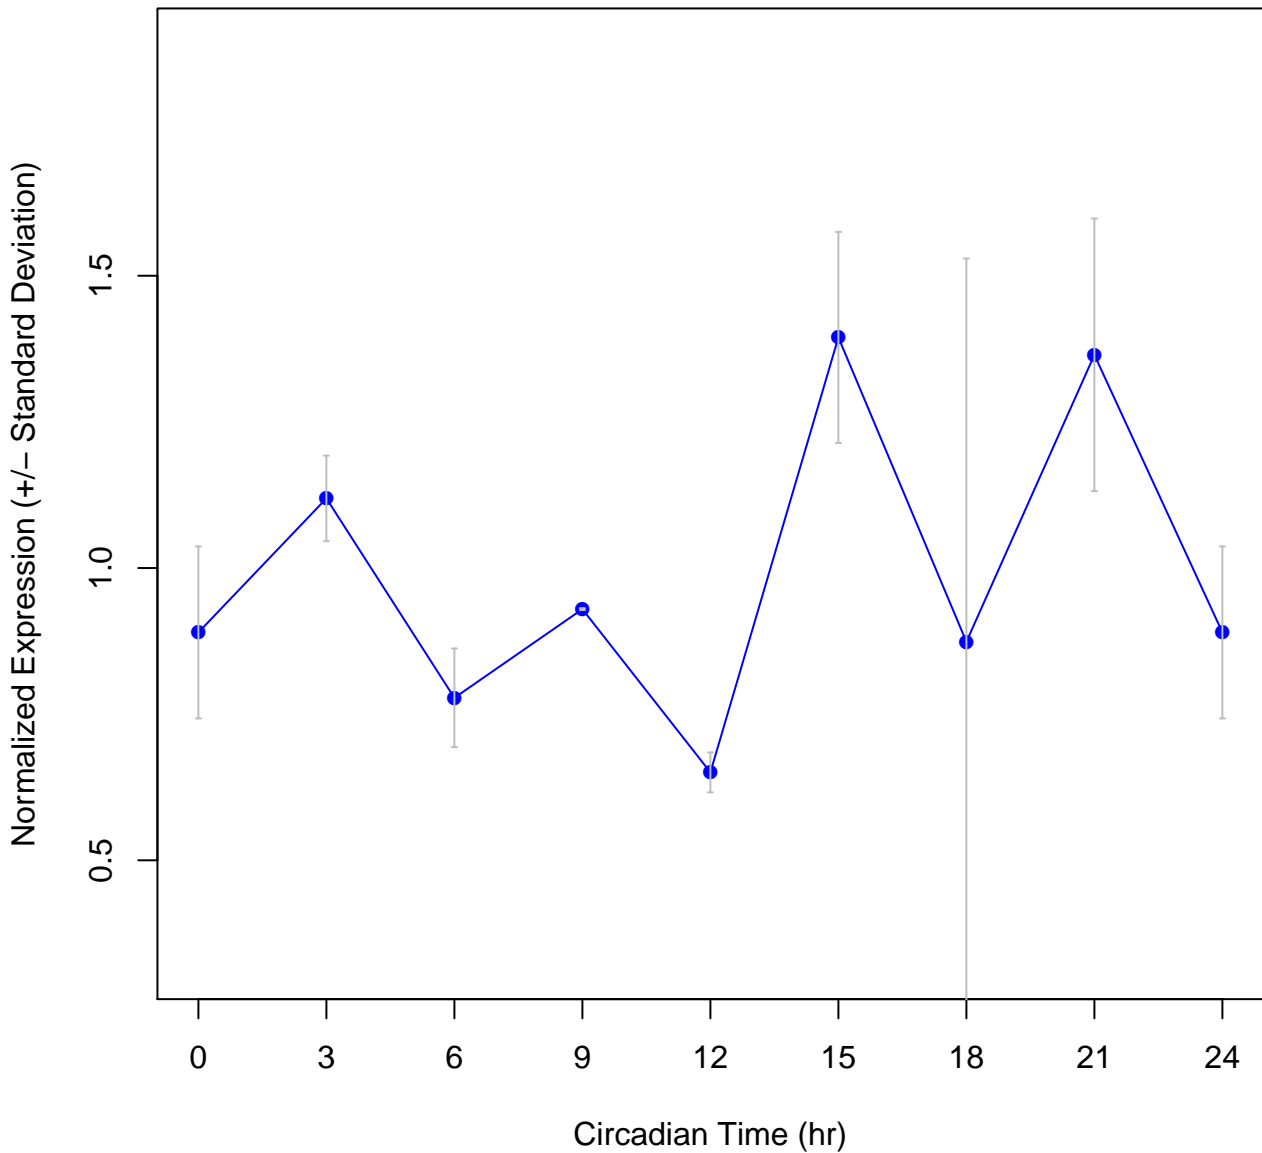

### Supplement Figure 3 *vipr1*

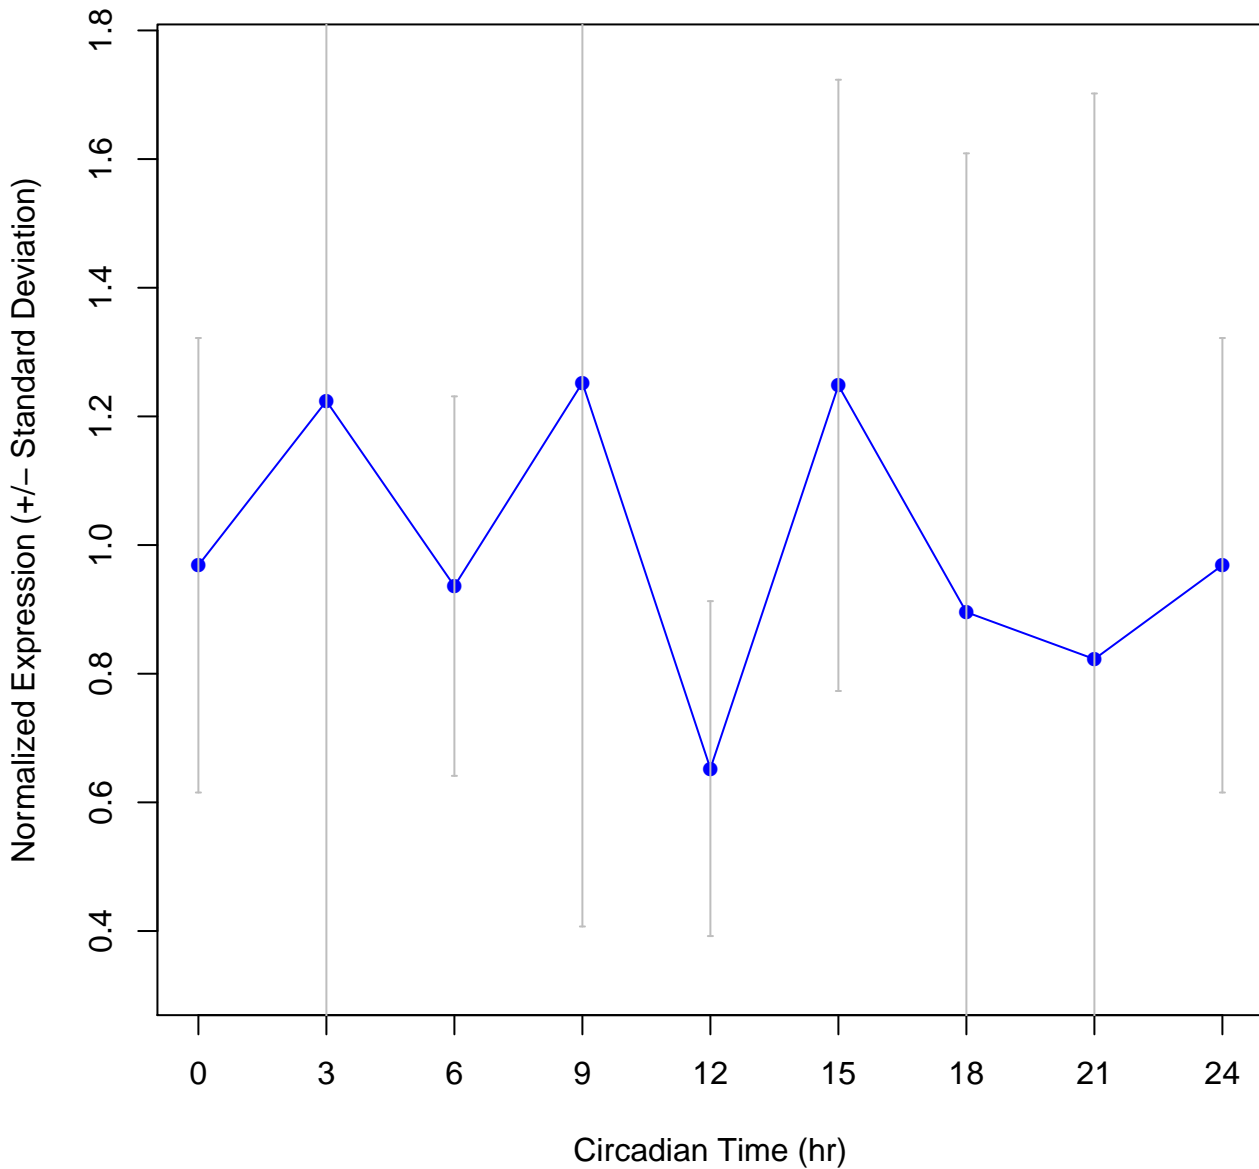

**Supplement Figure 3 wdr37**

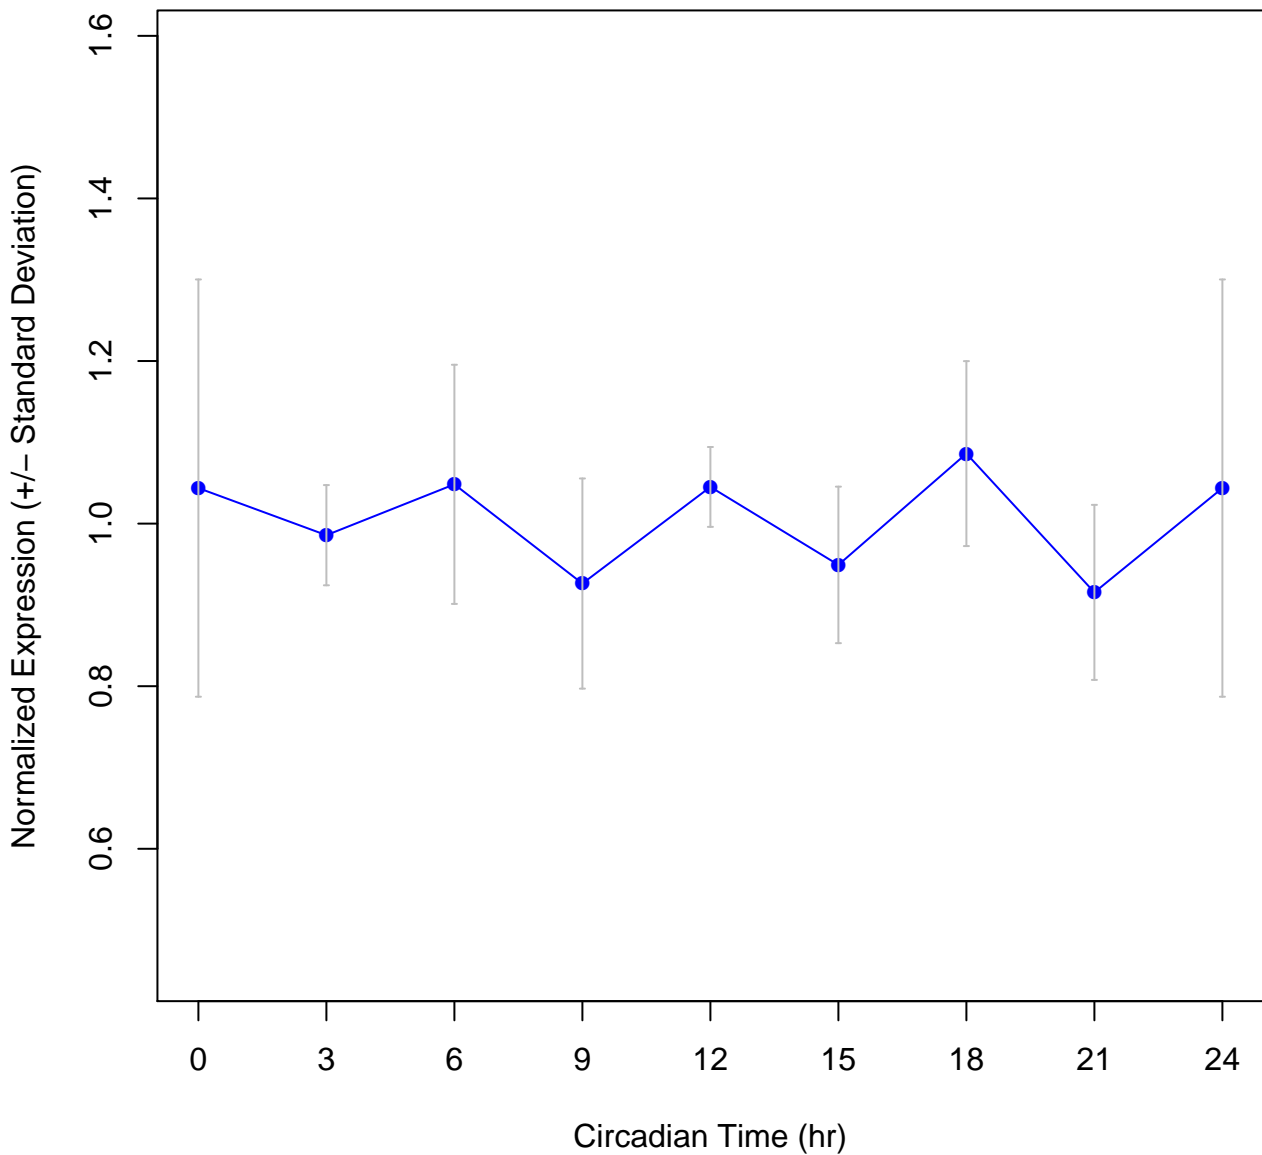



**Supplement Figure 3 wdr76**

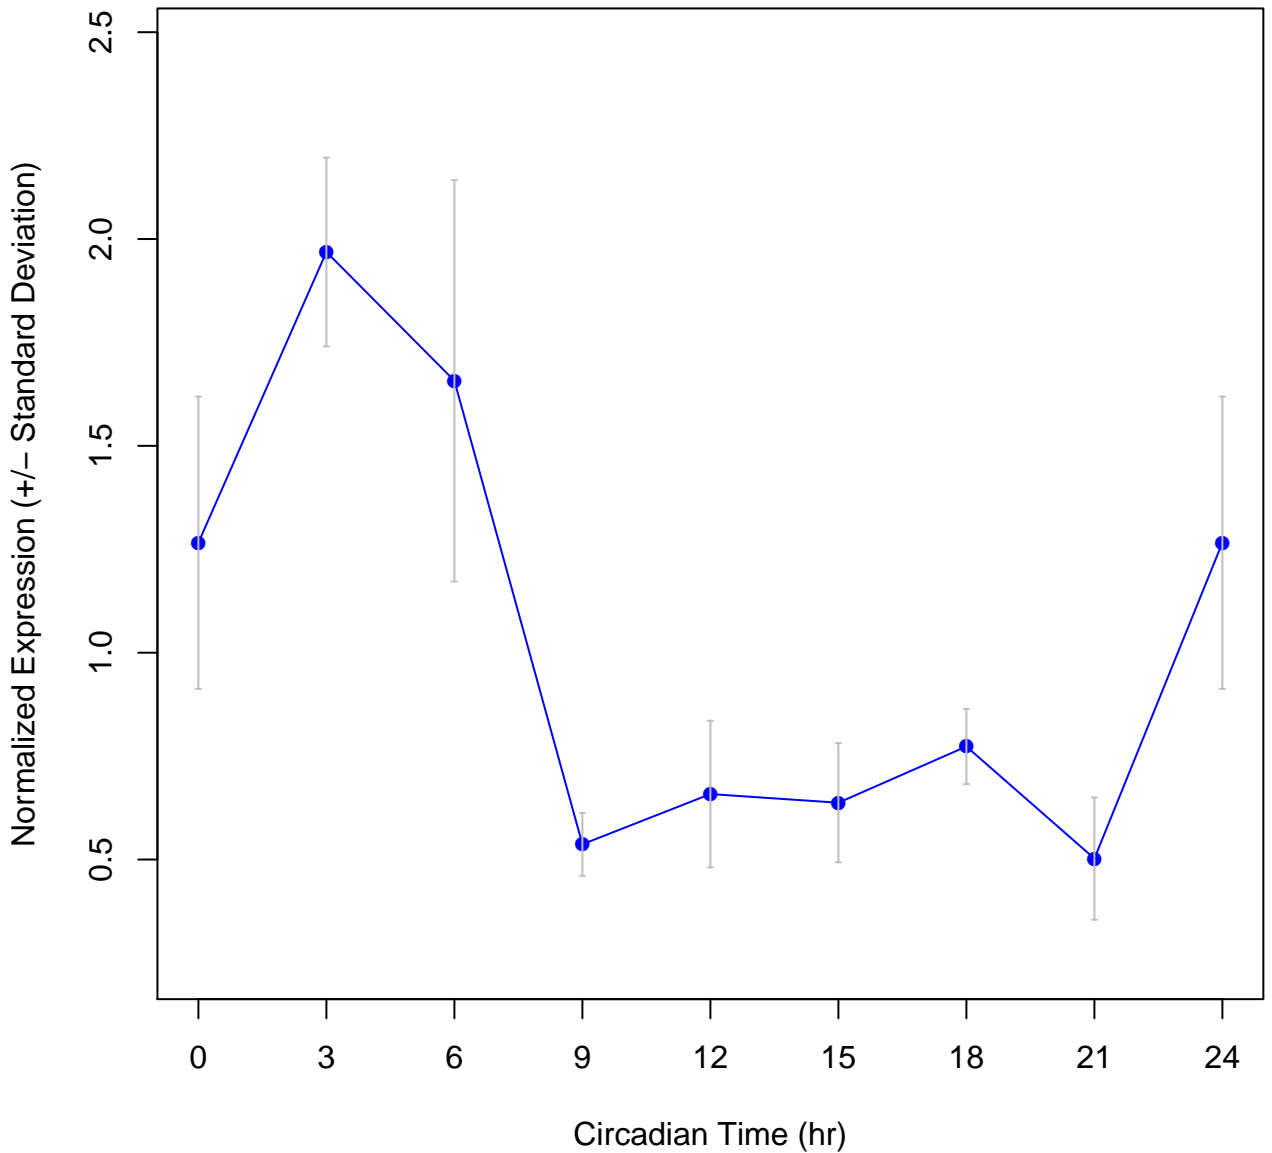

Supplement Figure 3 wnt10b

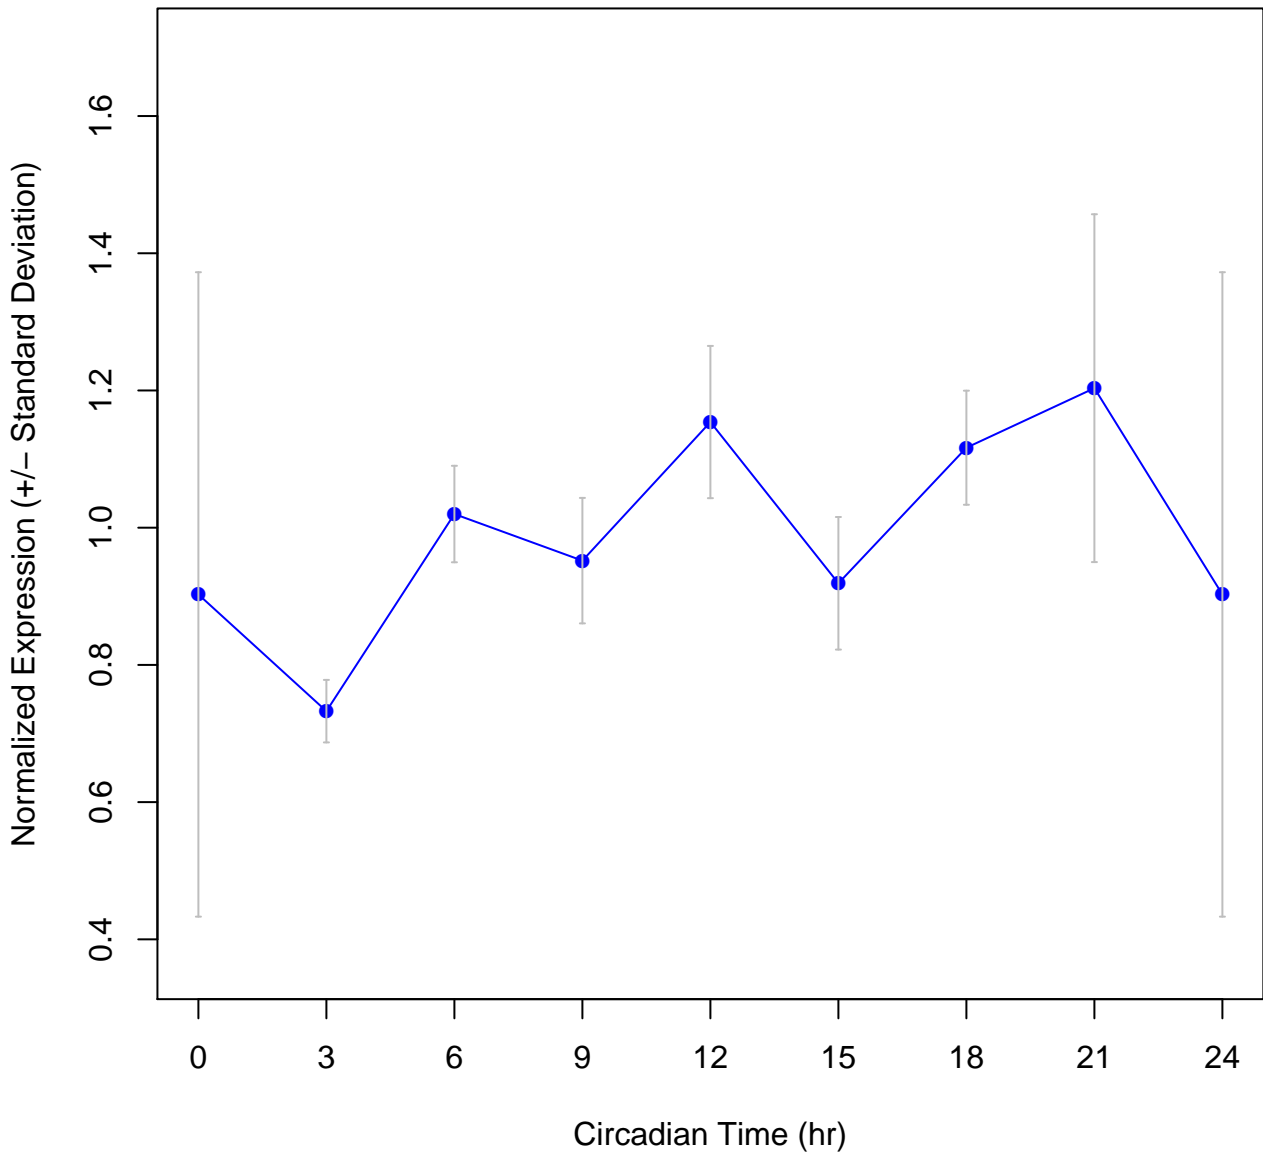

**Supplement Figure 3 wnt2b**

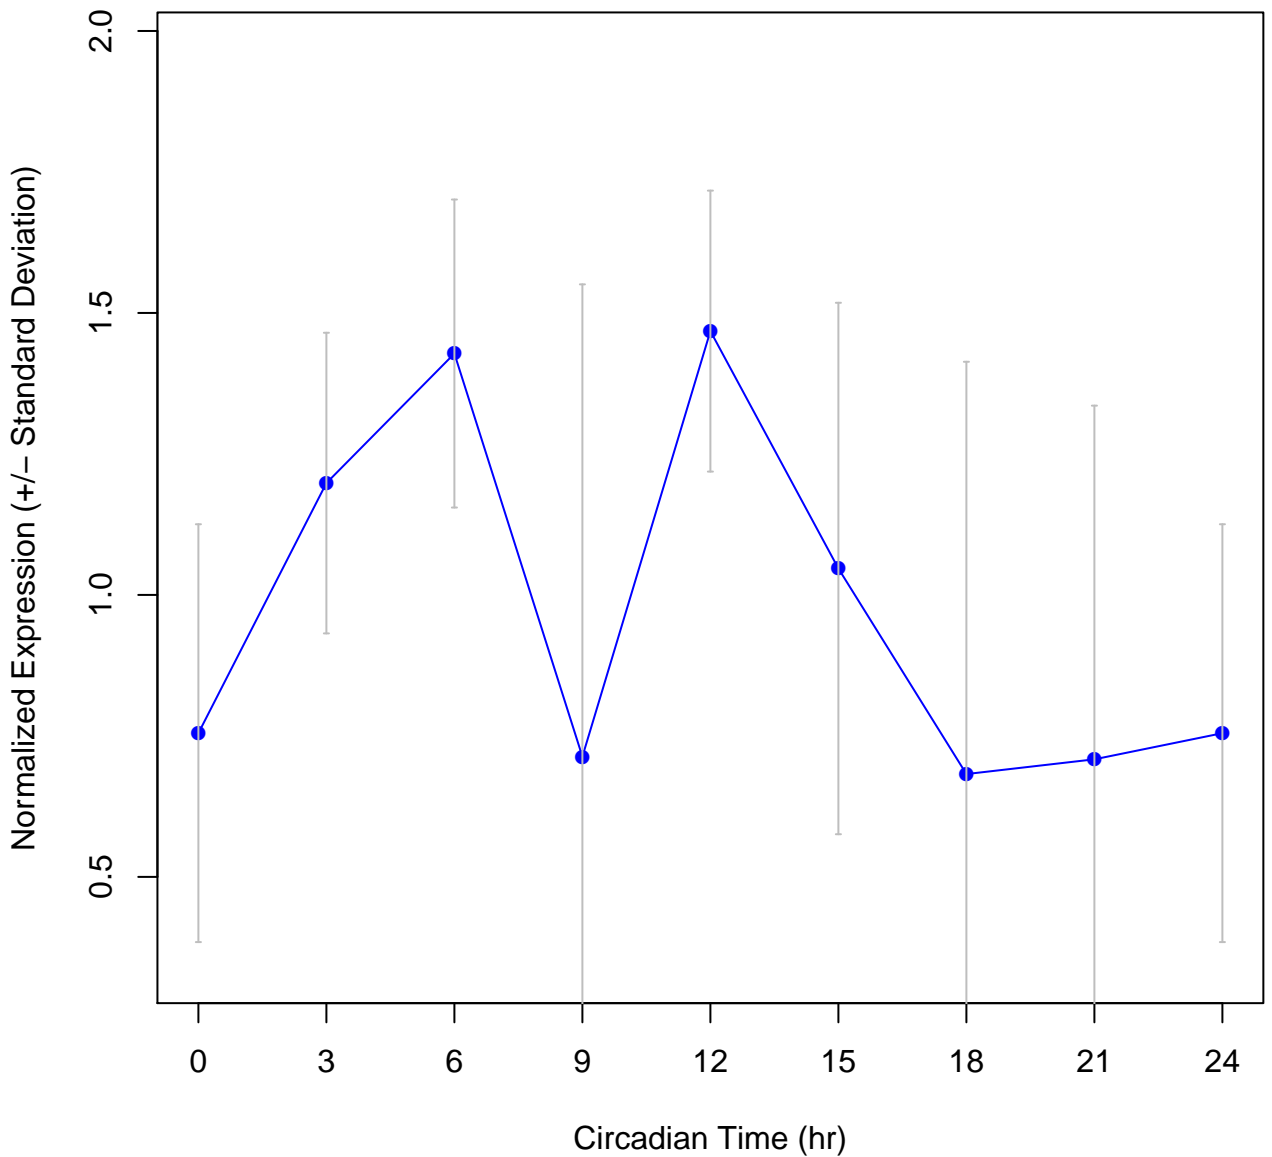

Supplement Figure 3 *wnt5a*

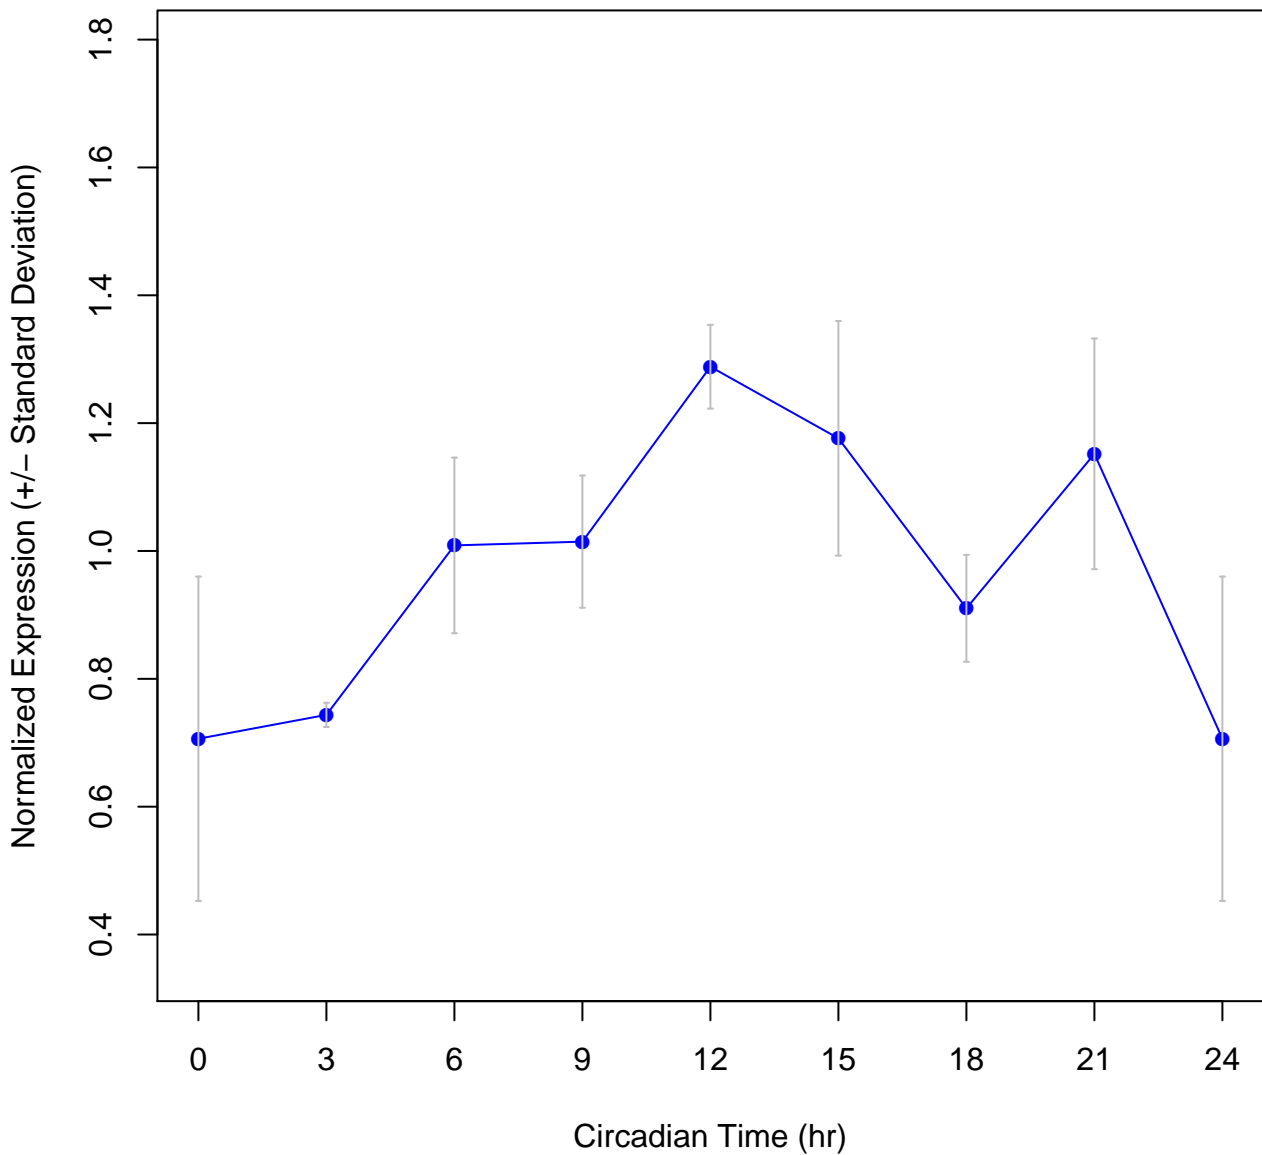

Supplement Figure 3 wt1

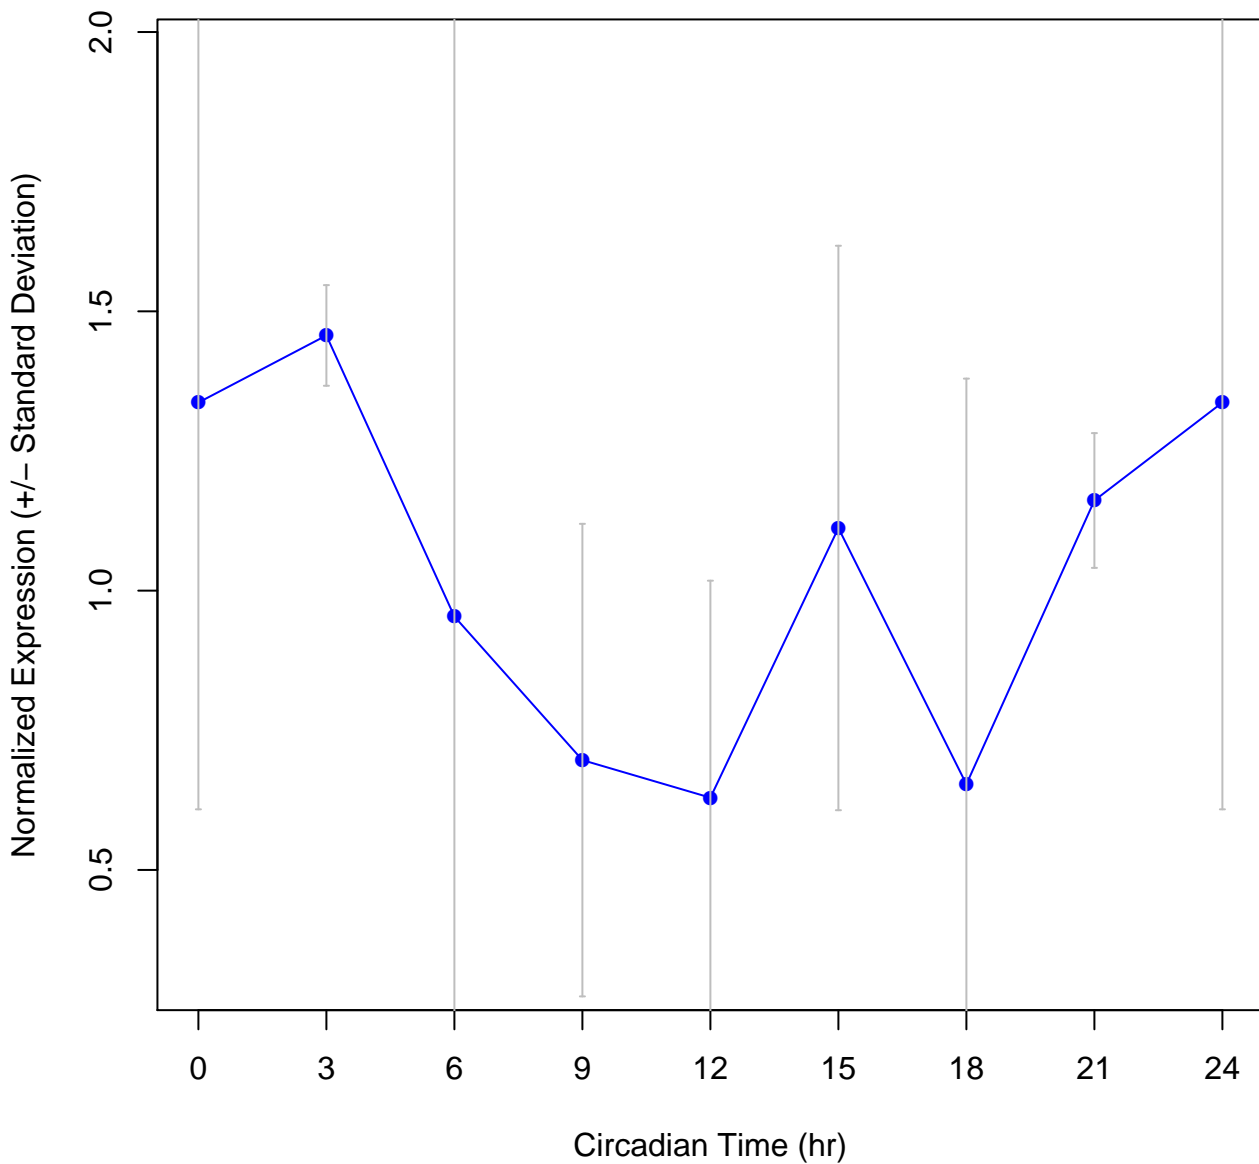

Supplement Figure 3 xpc

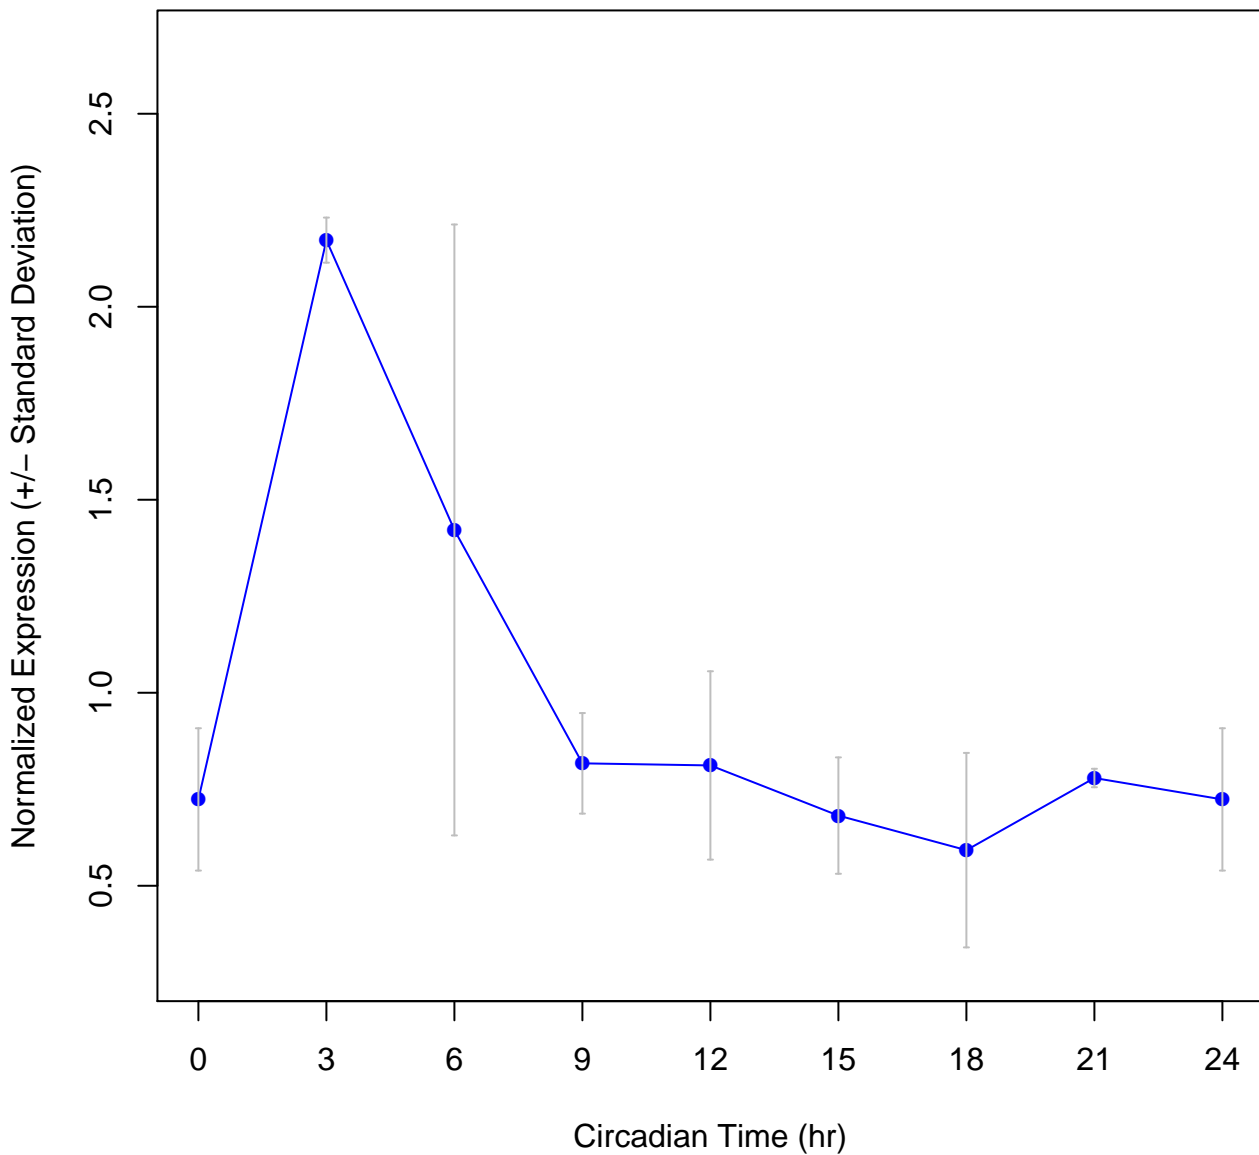

### Supplement Figure 3 xrcc1

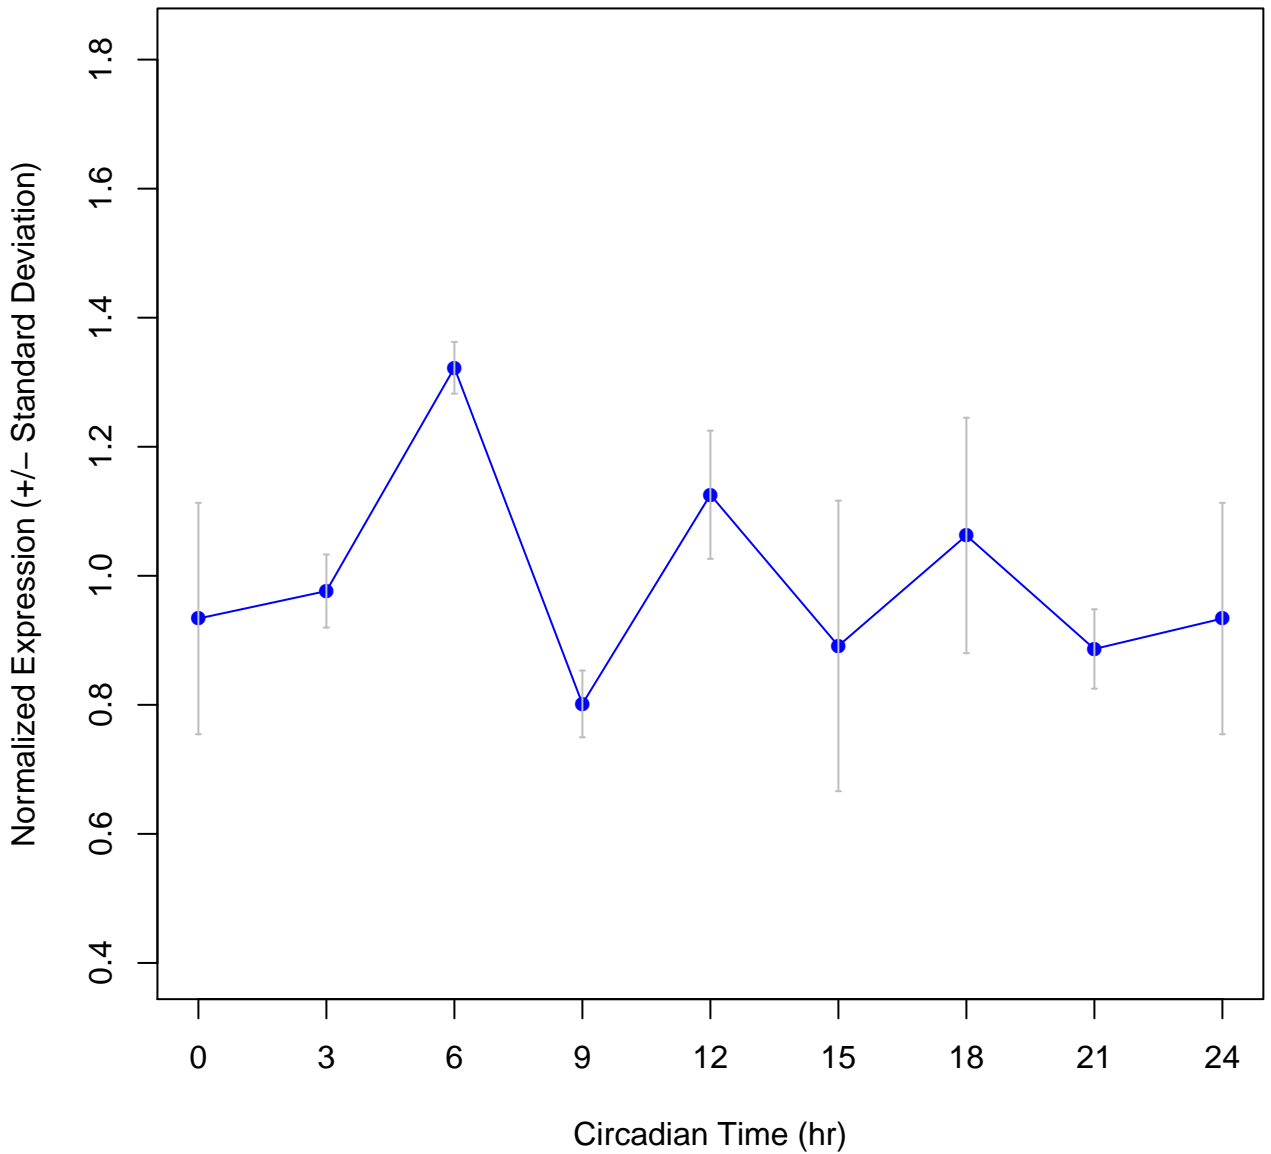

Supplement Figure 3 ybx2

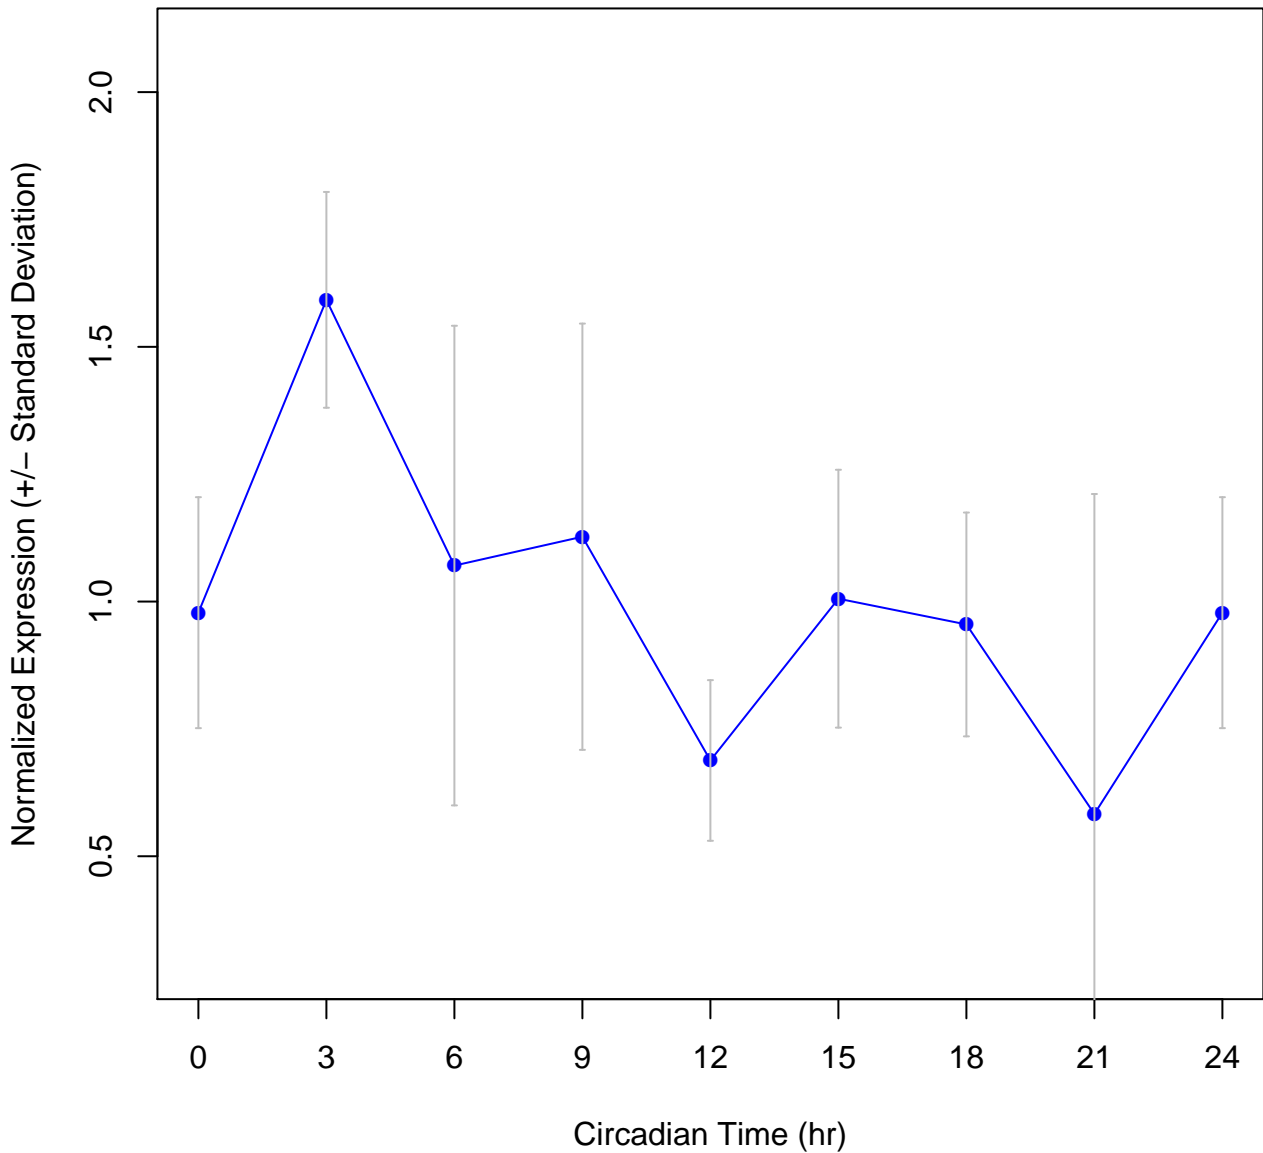



Supplement Figure 3 yme1

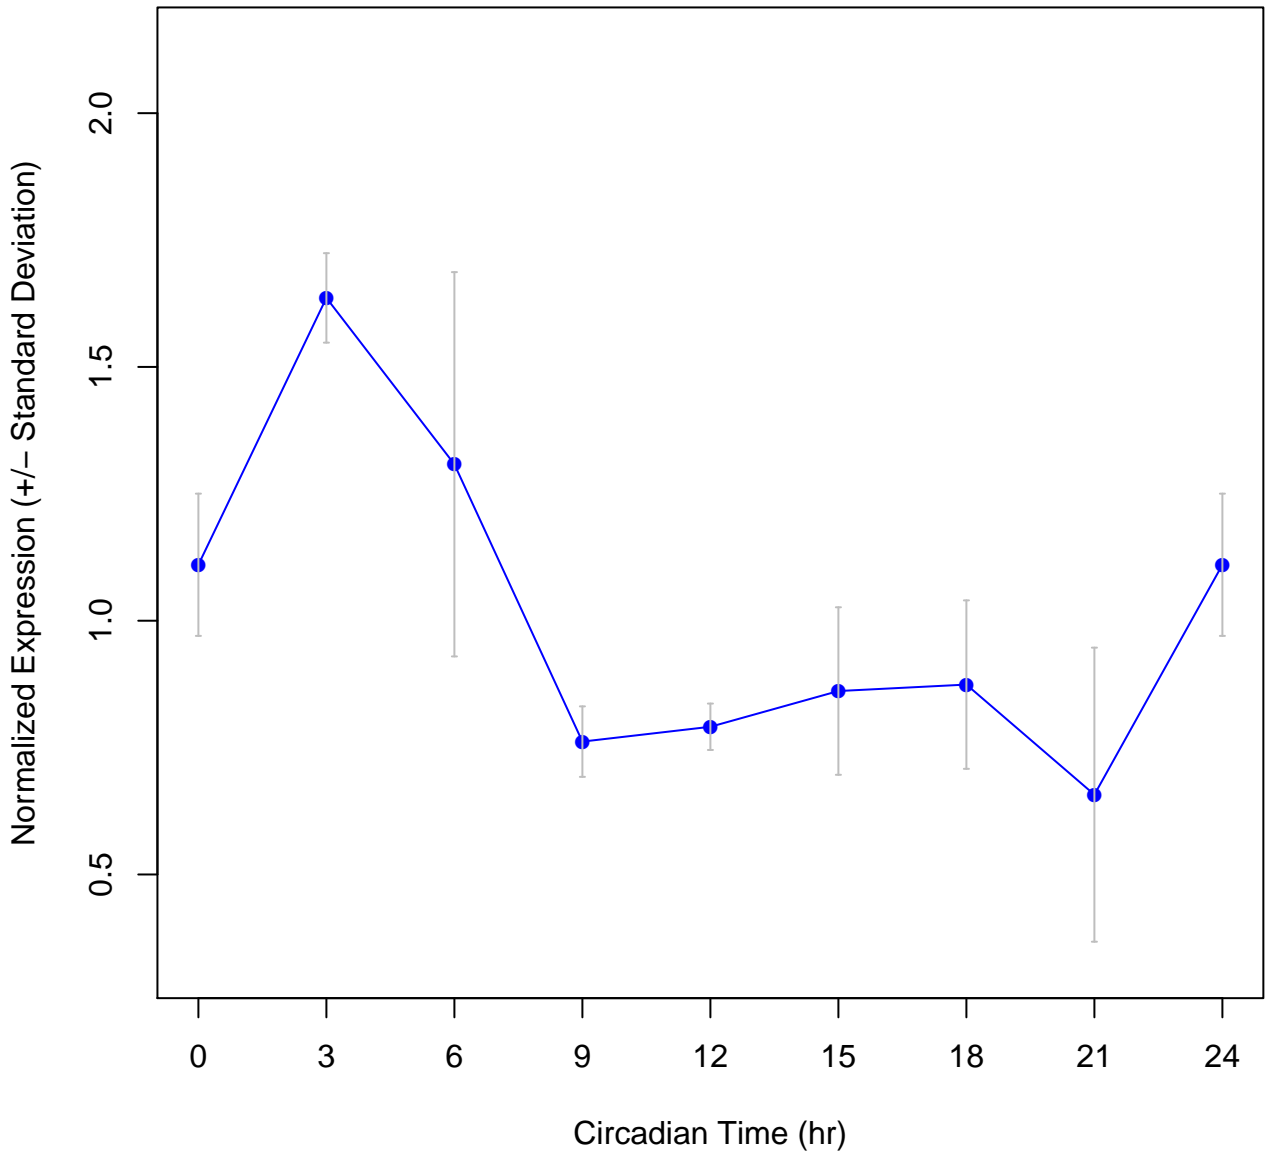

Supplement Figure 3 ywhaQ

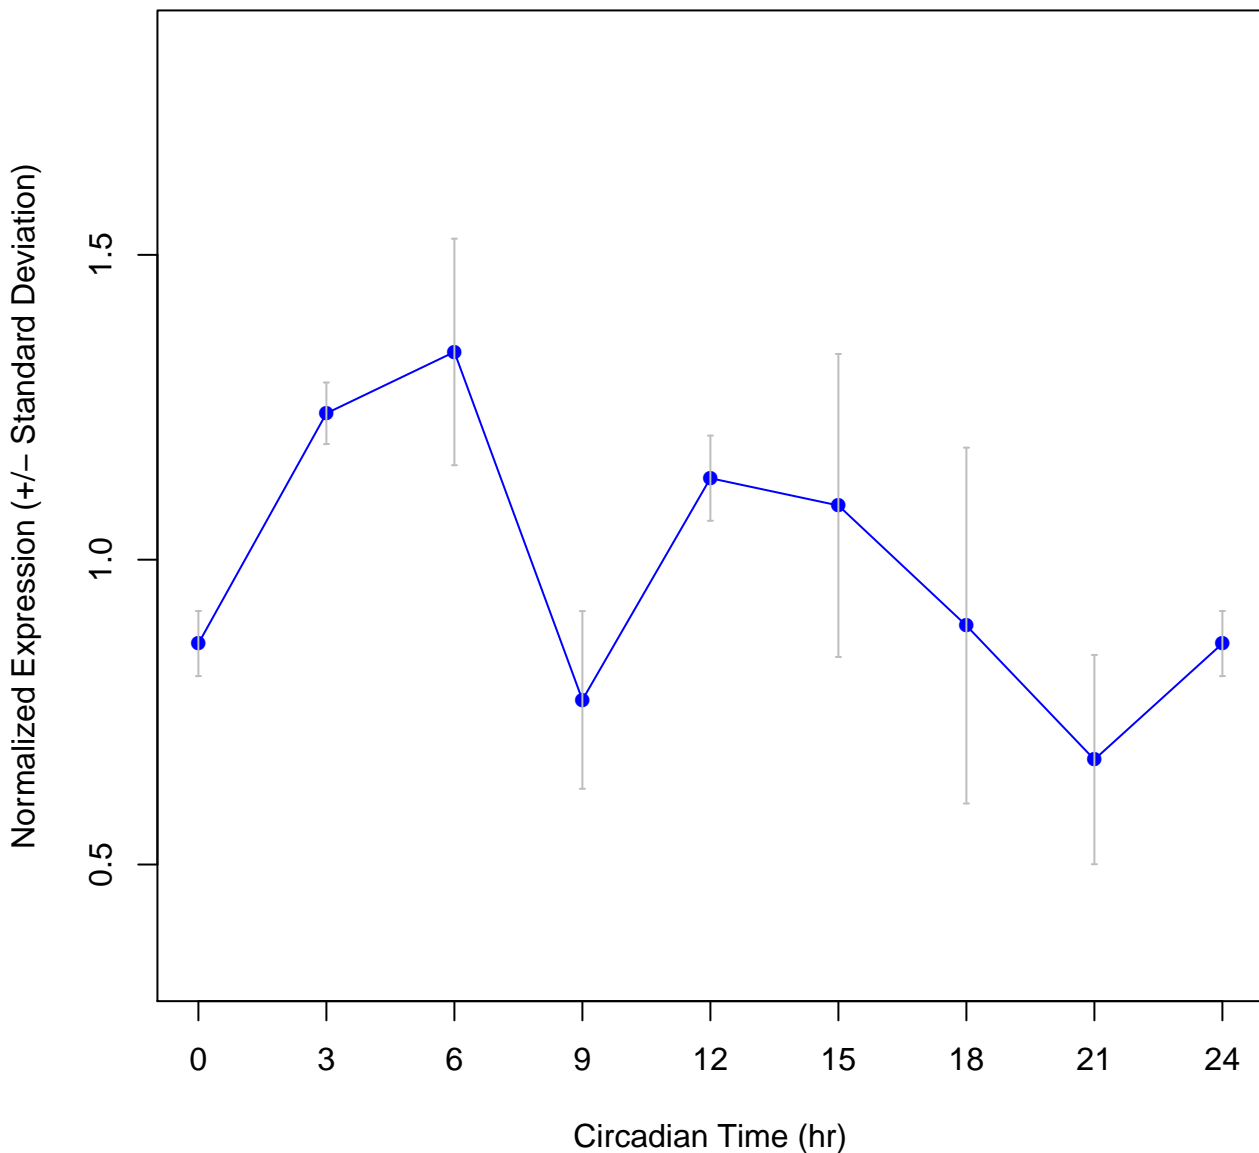

Supplement Figure 4 6-4 photolyase

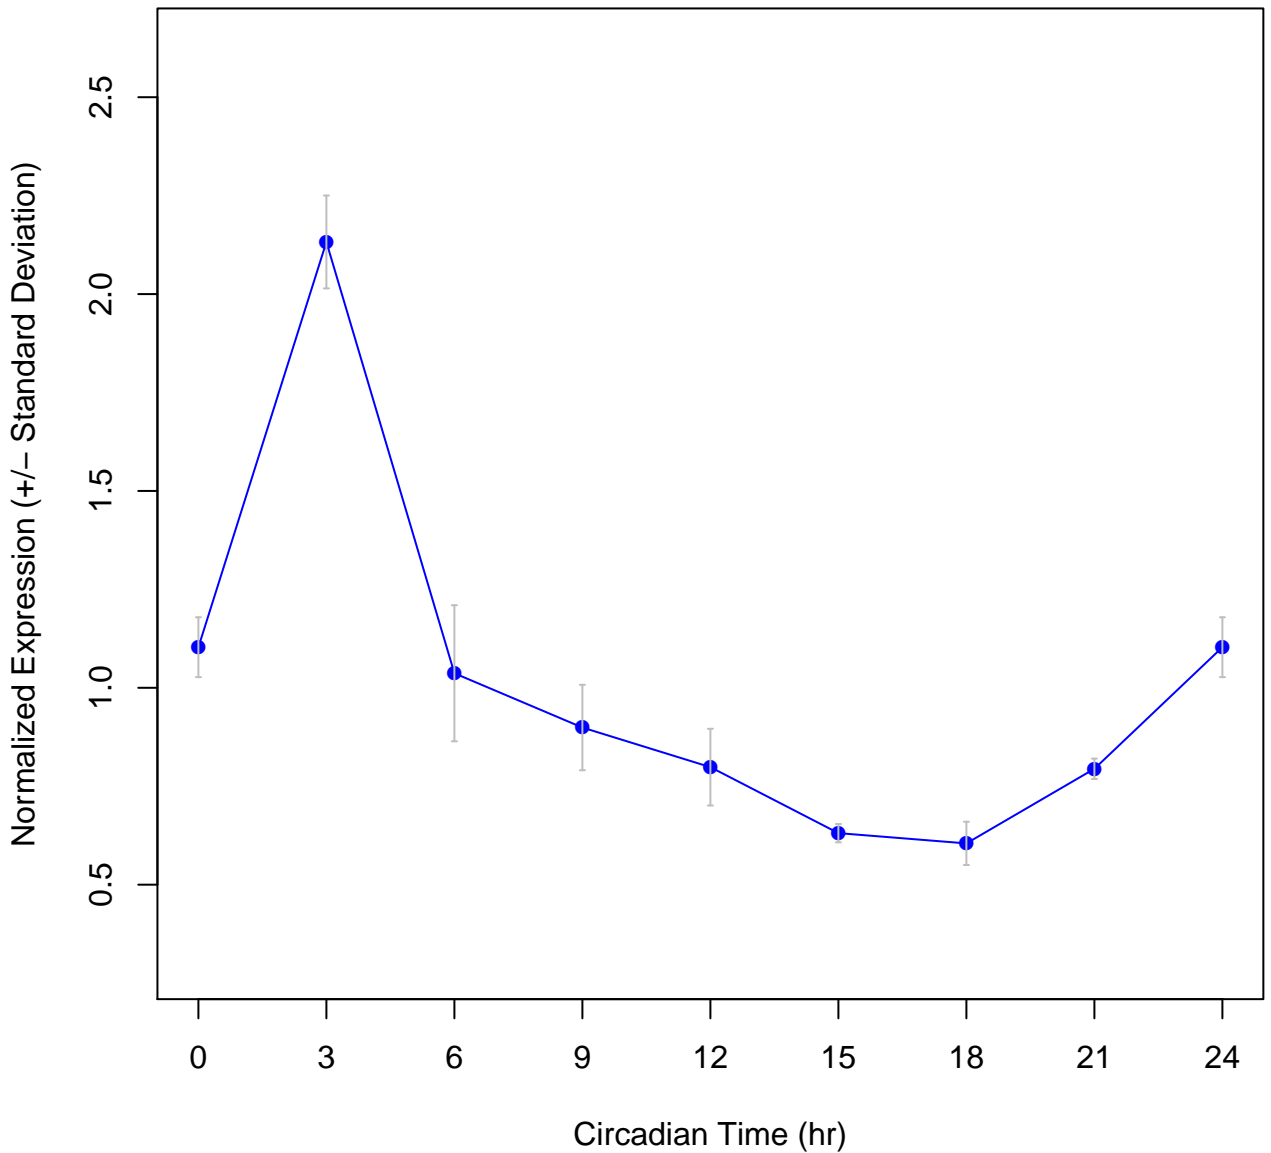

Supplement Figure 4 a2ml1

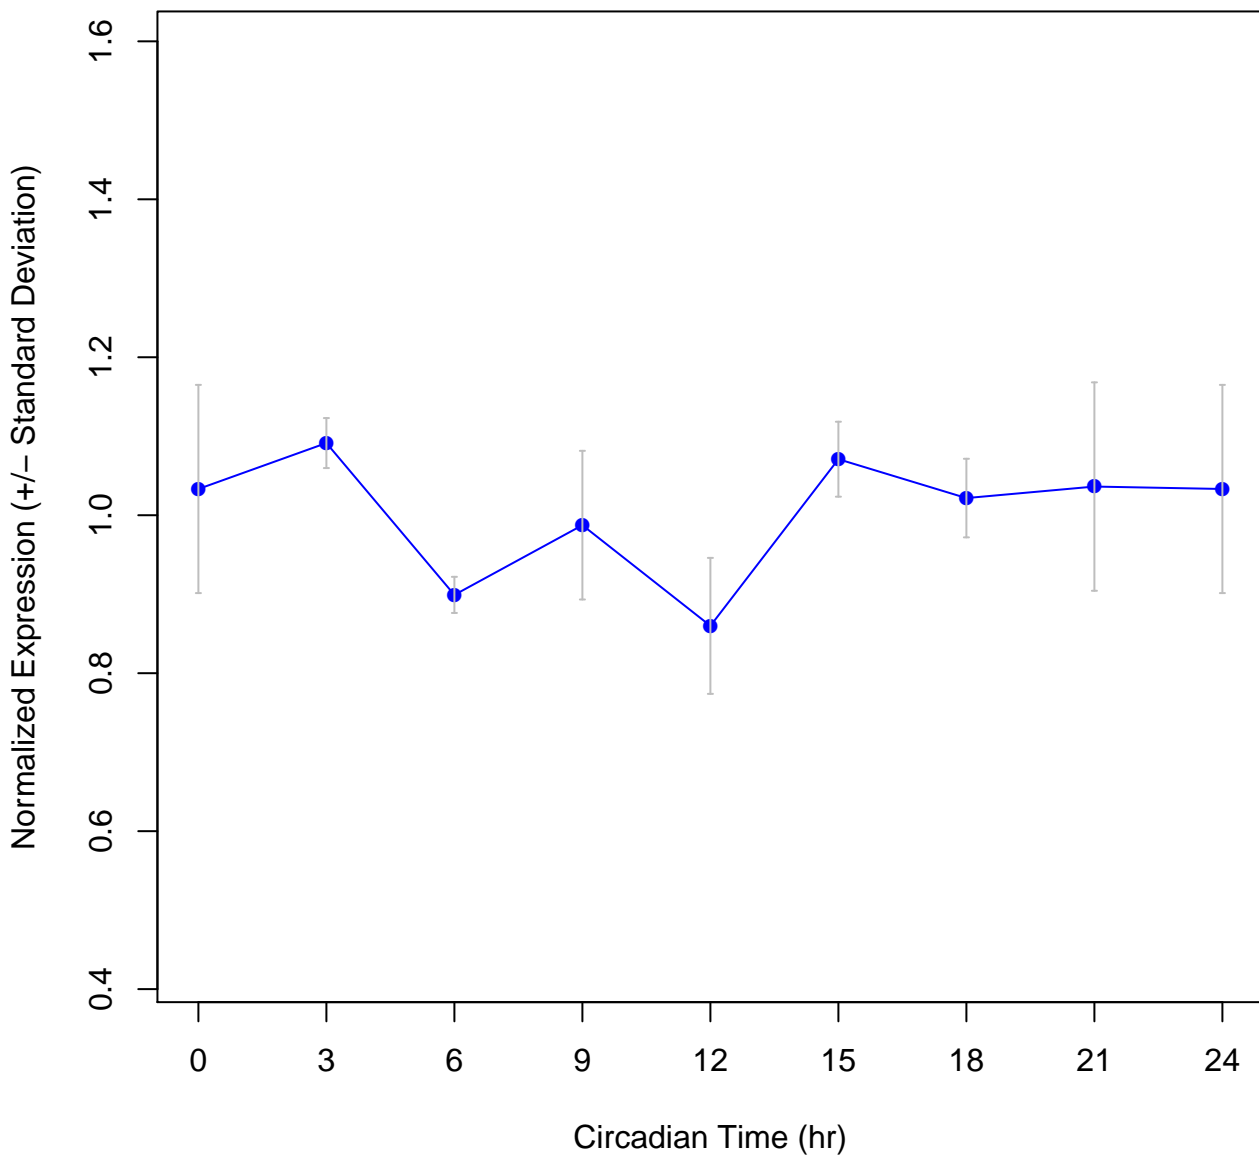

Supplement Figure 4 adamts2

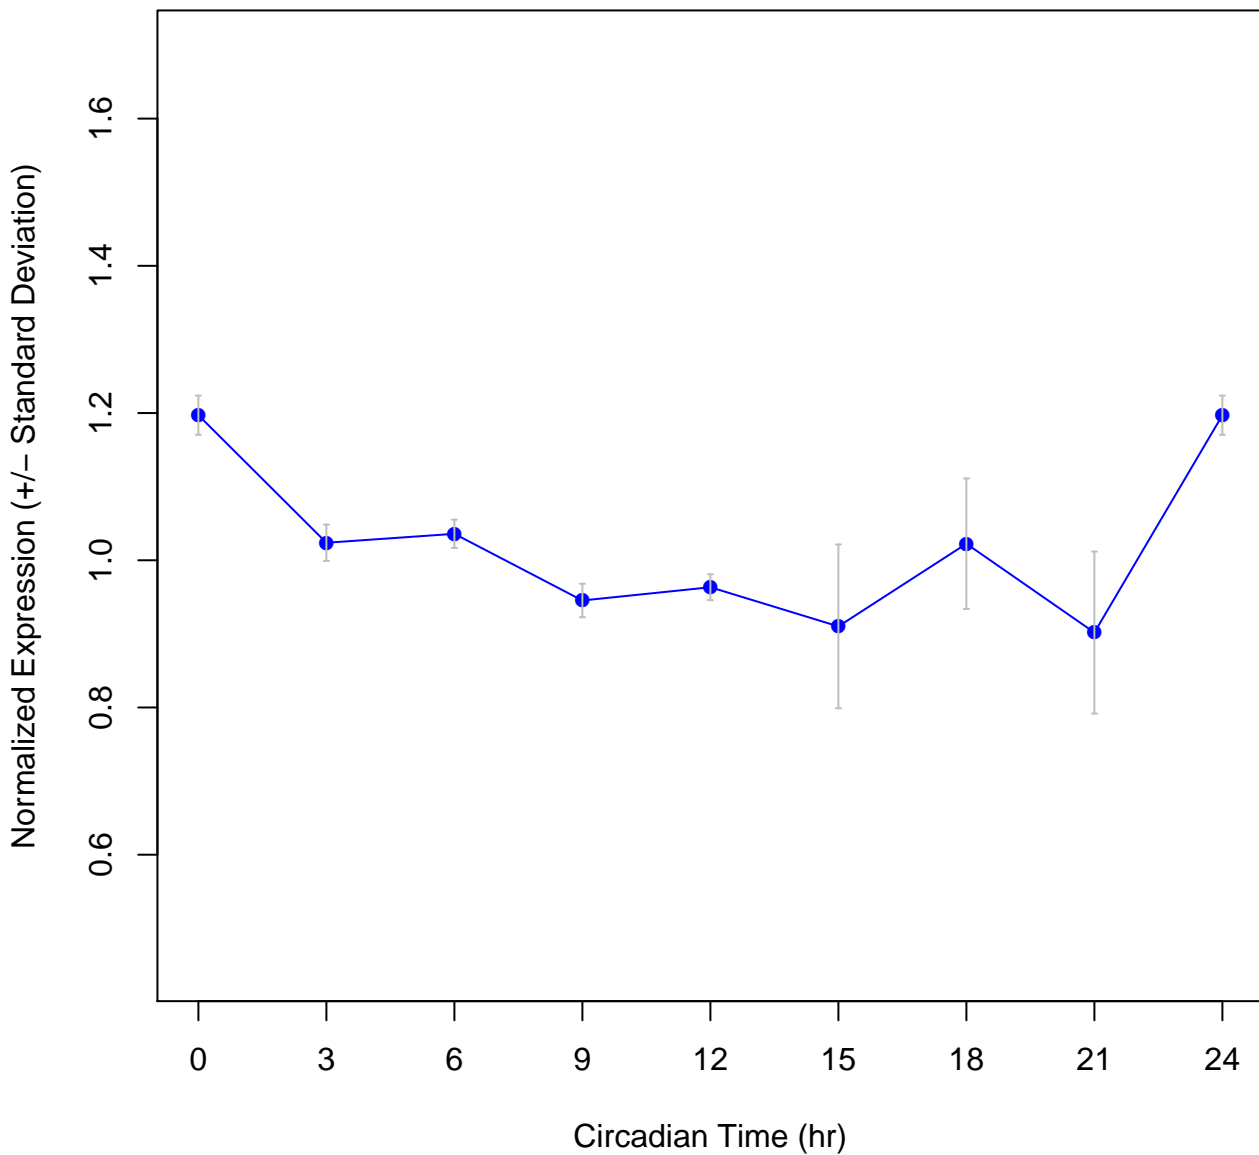

Supplement Figure 4 adcy2

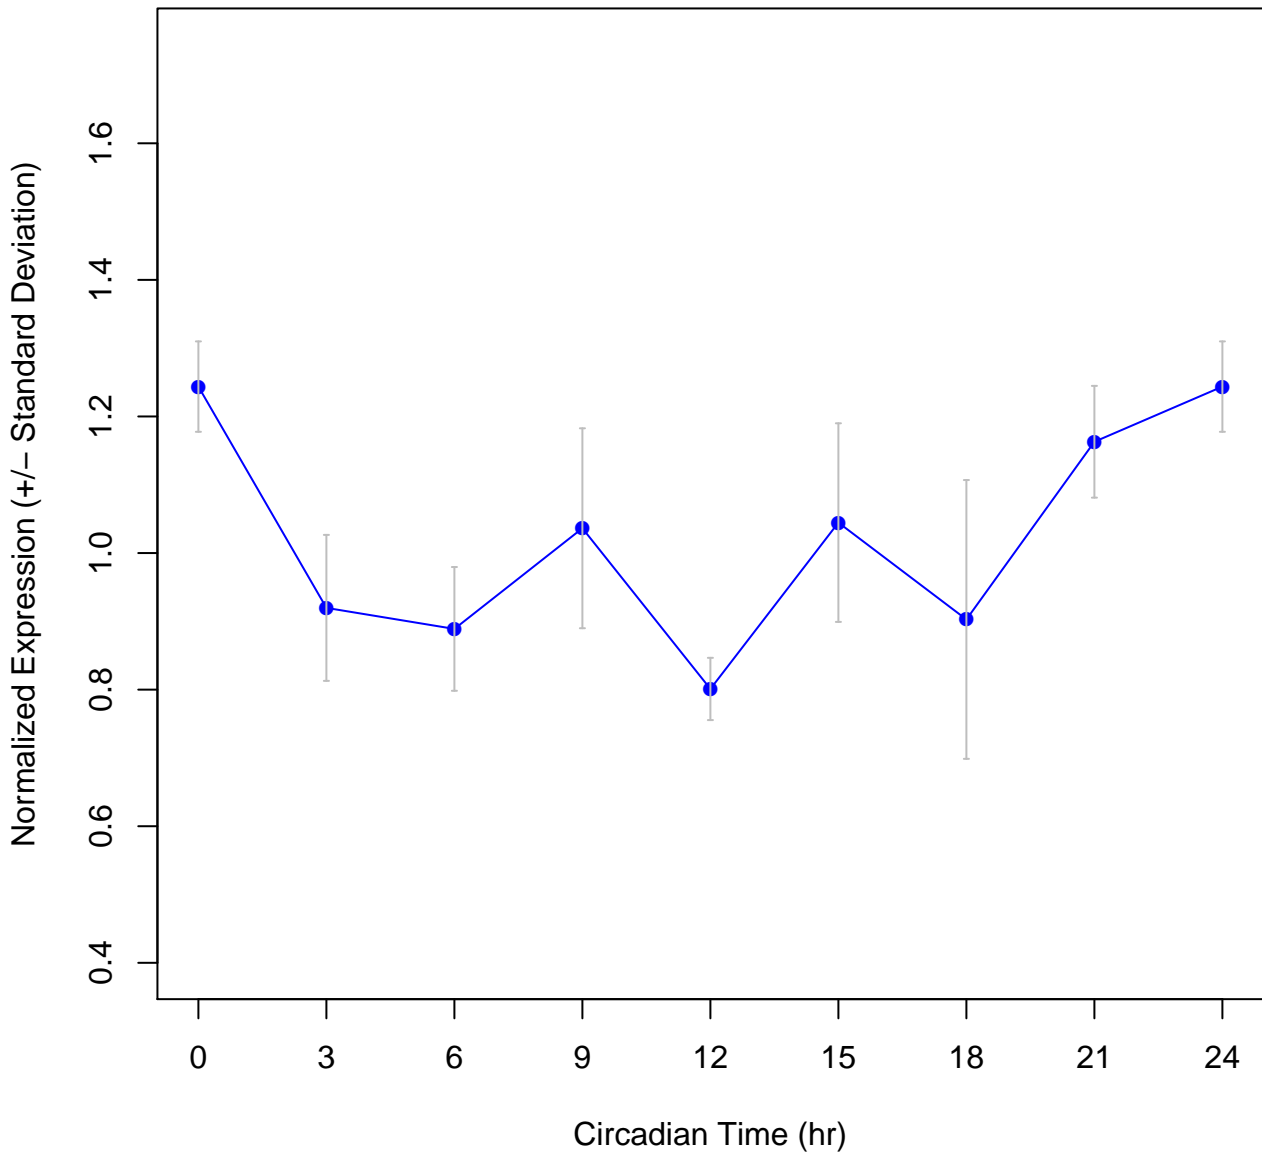

Supplement Figure 4 adrb2

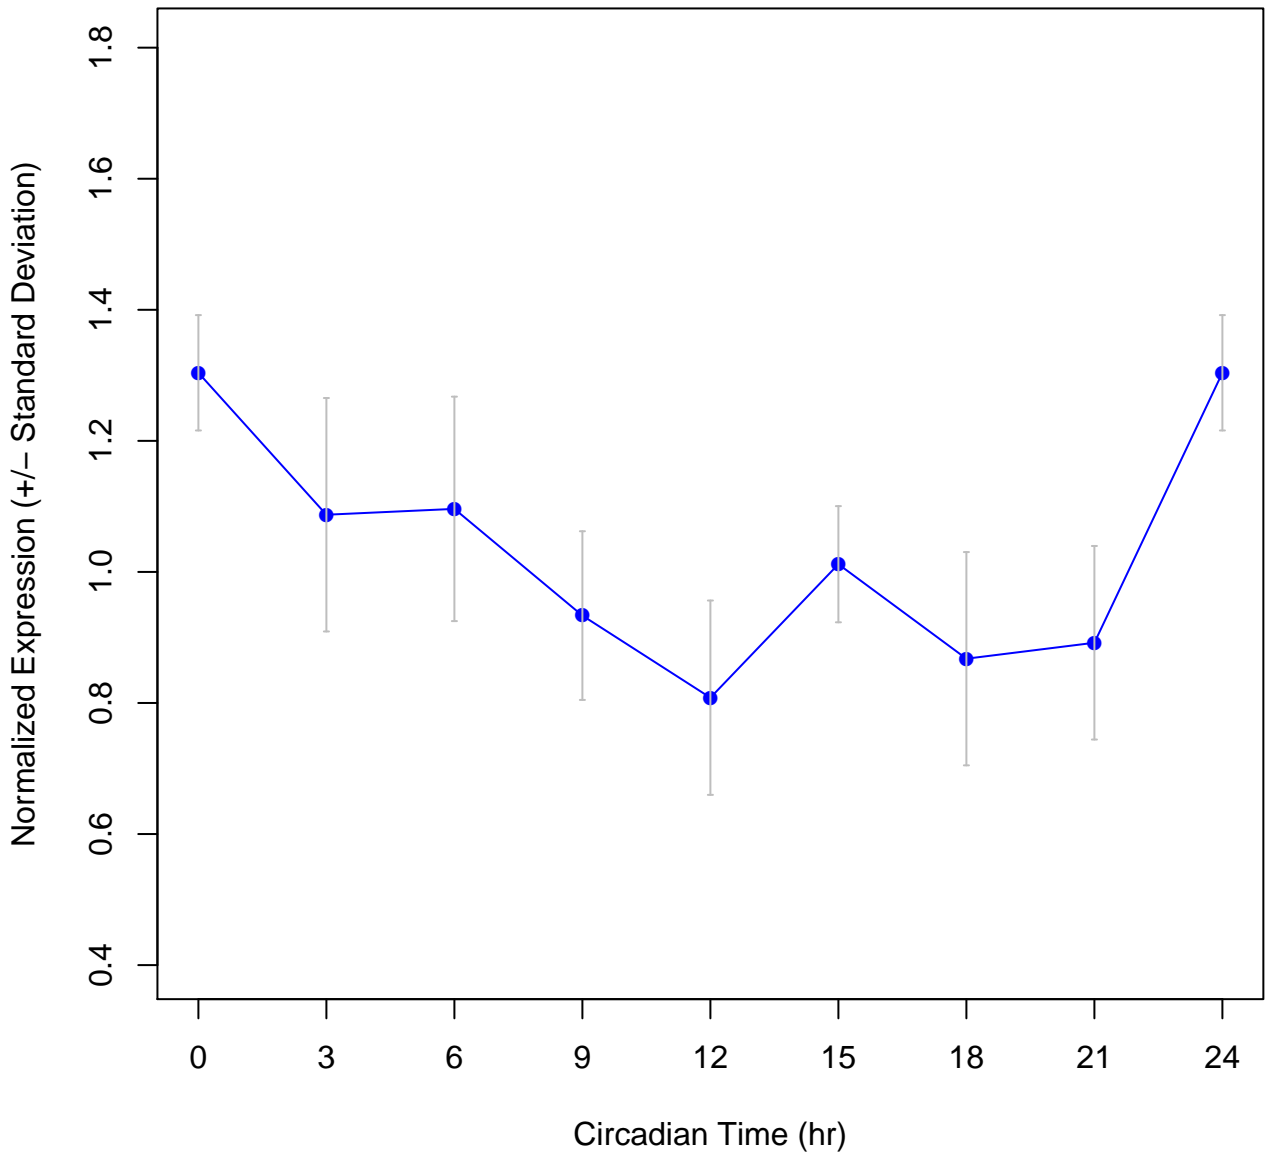

**Supplement Figure 4 akt1**

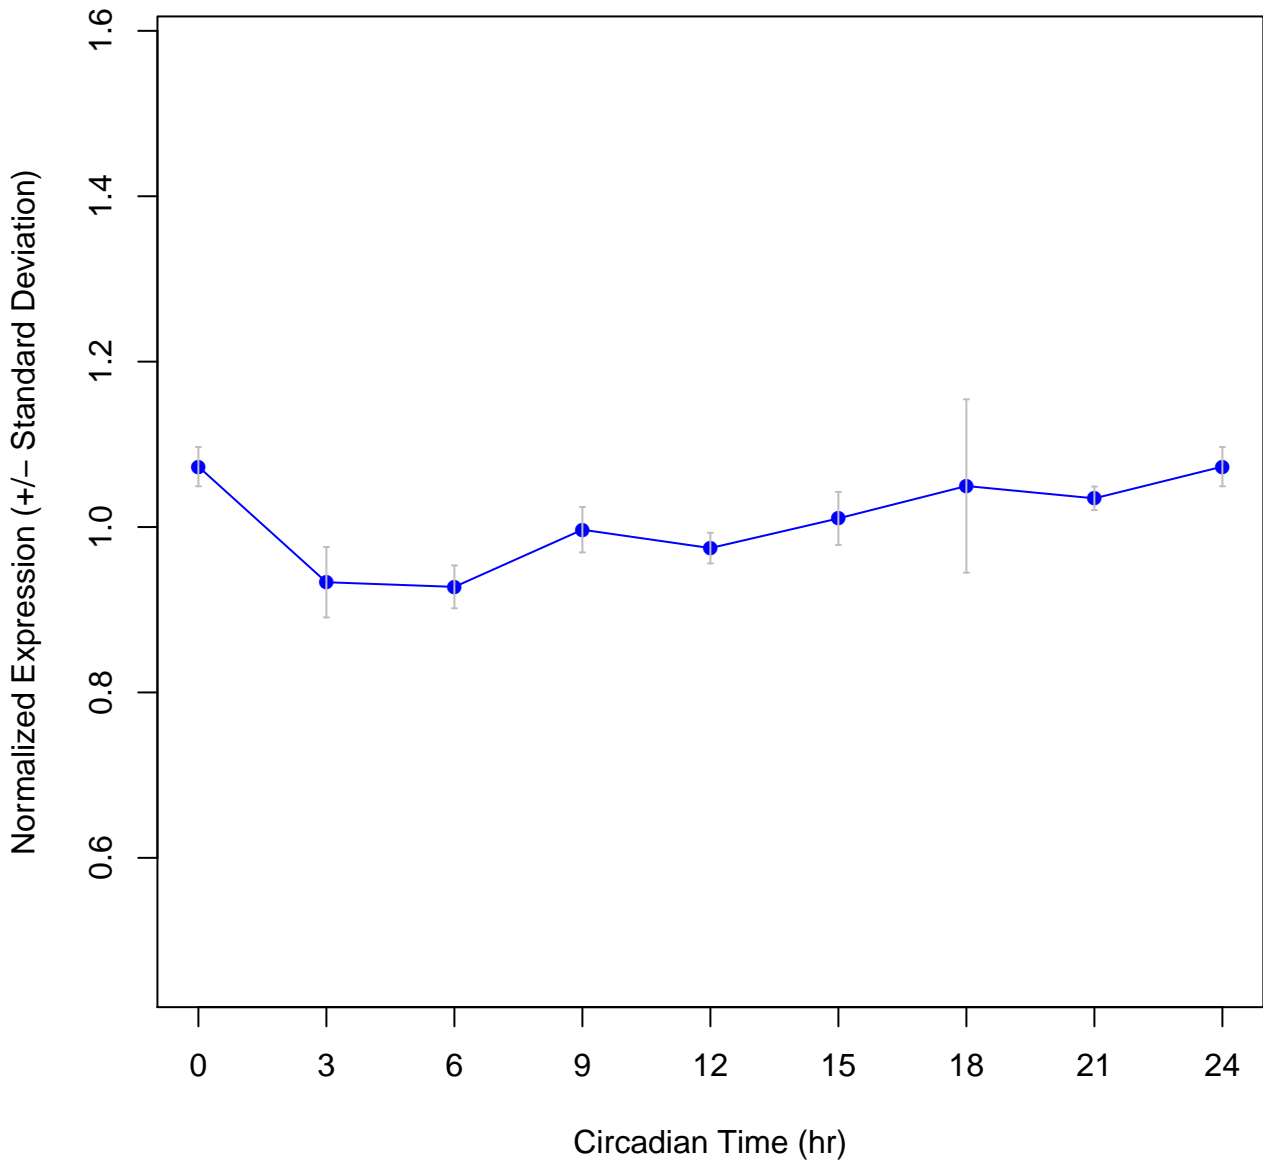



Supplement Figure 4 akt2

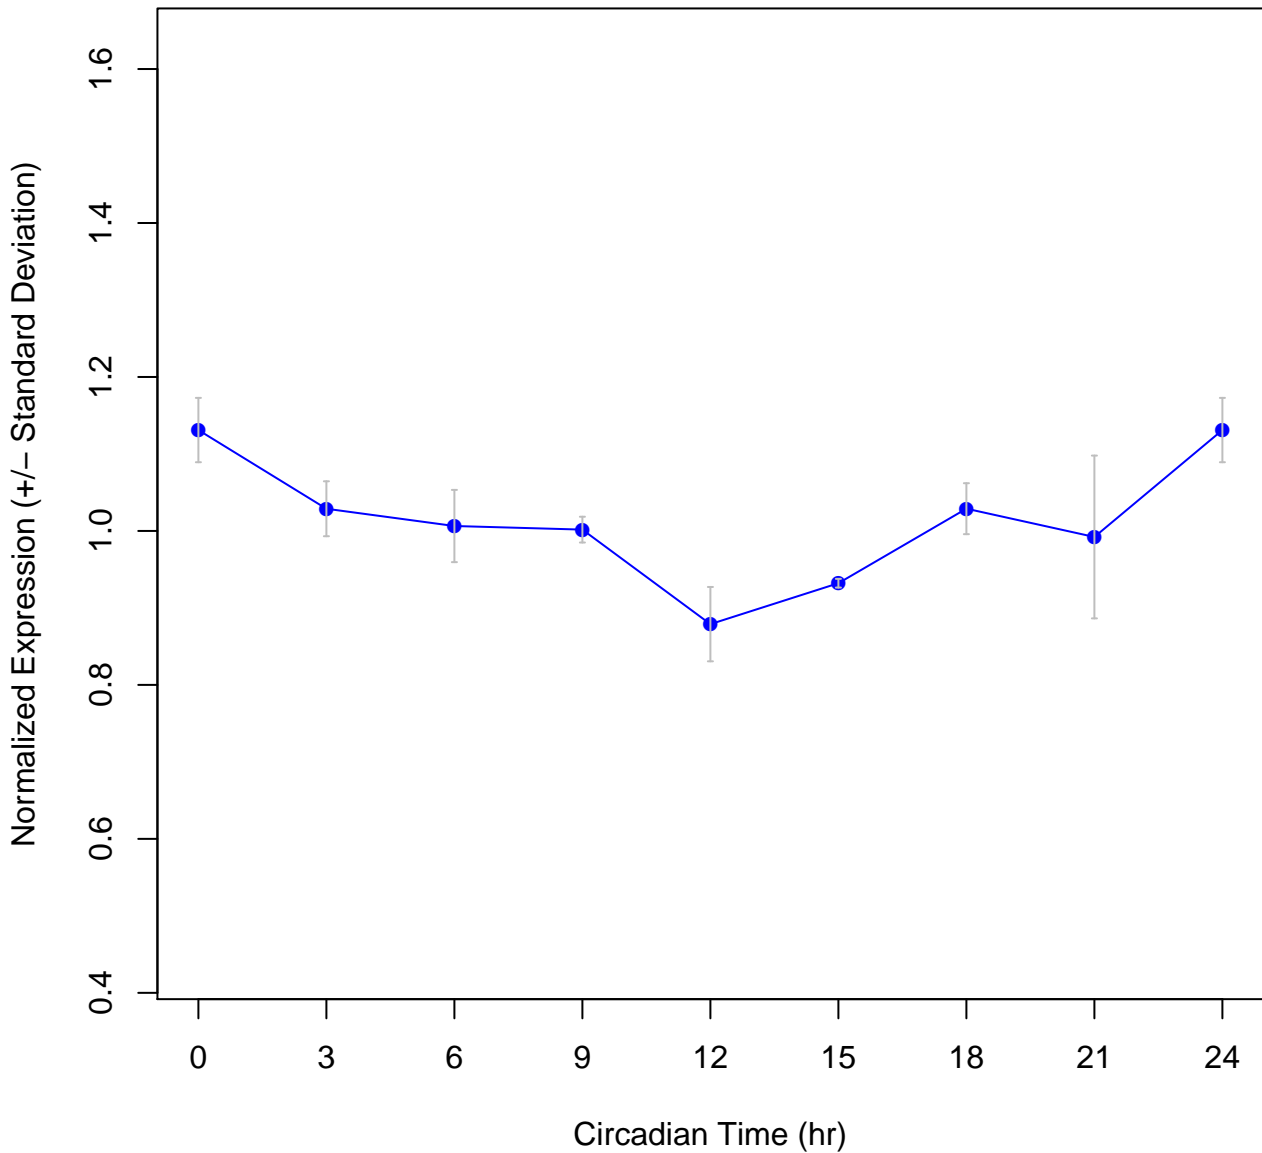

**Supplement Figure 4 akt3**

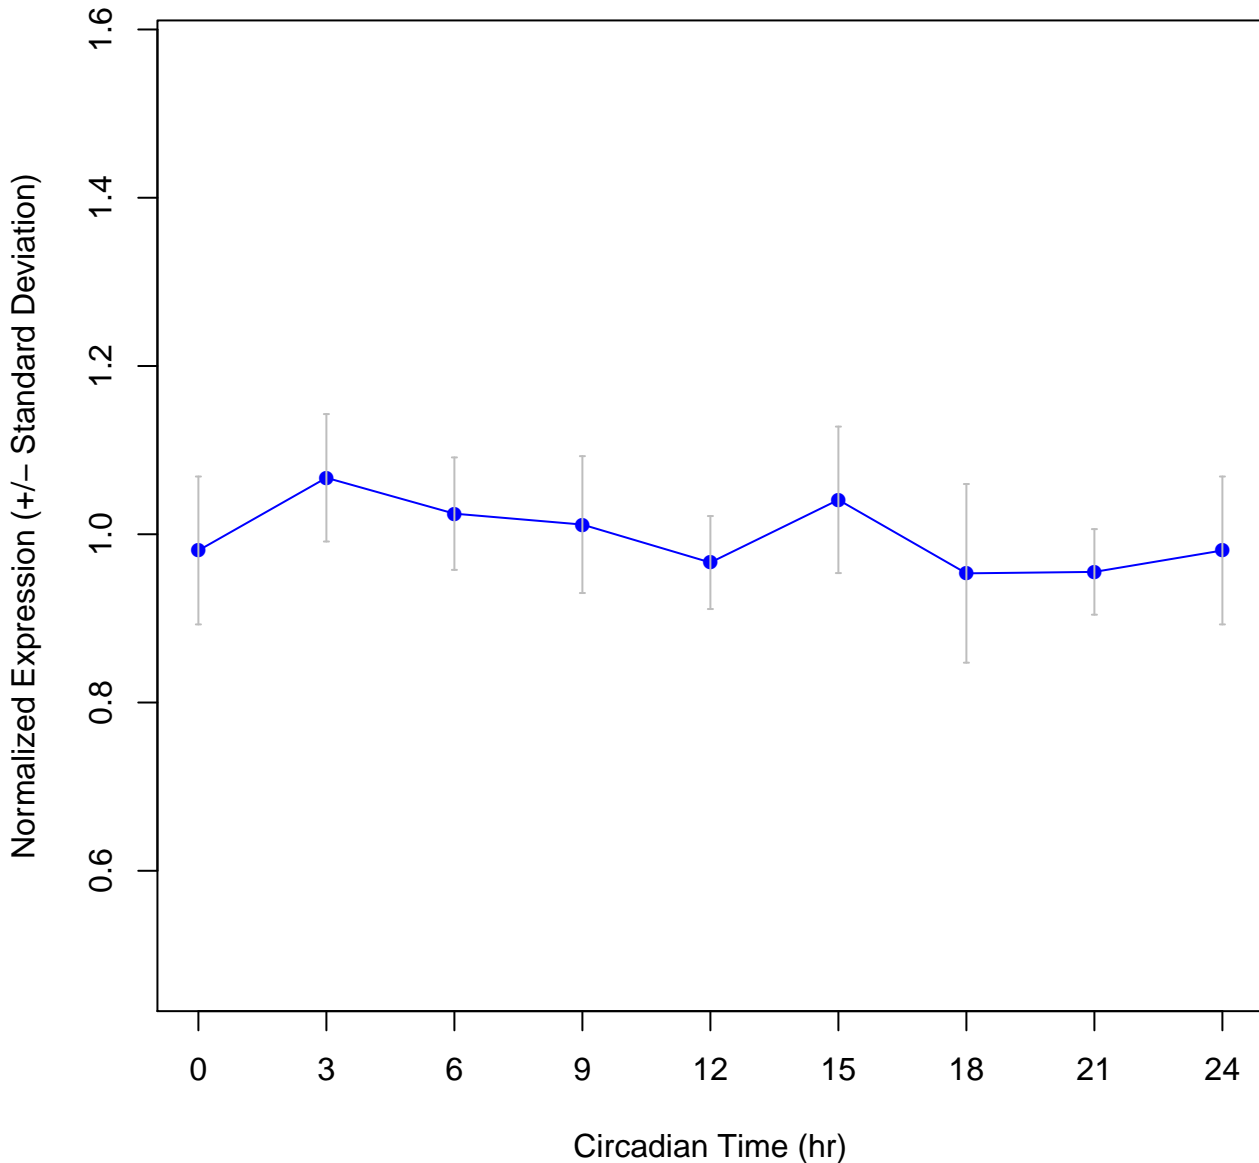

Supplement Figure 4 apex2

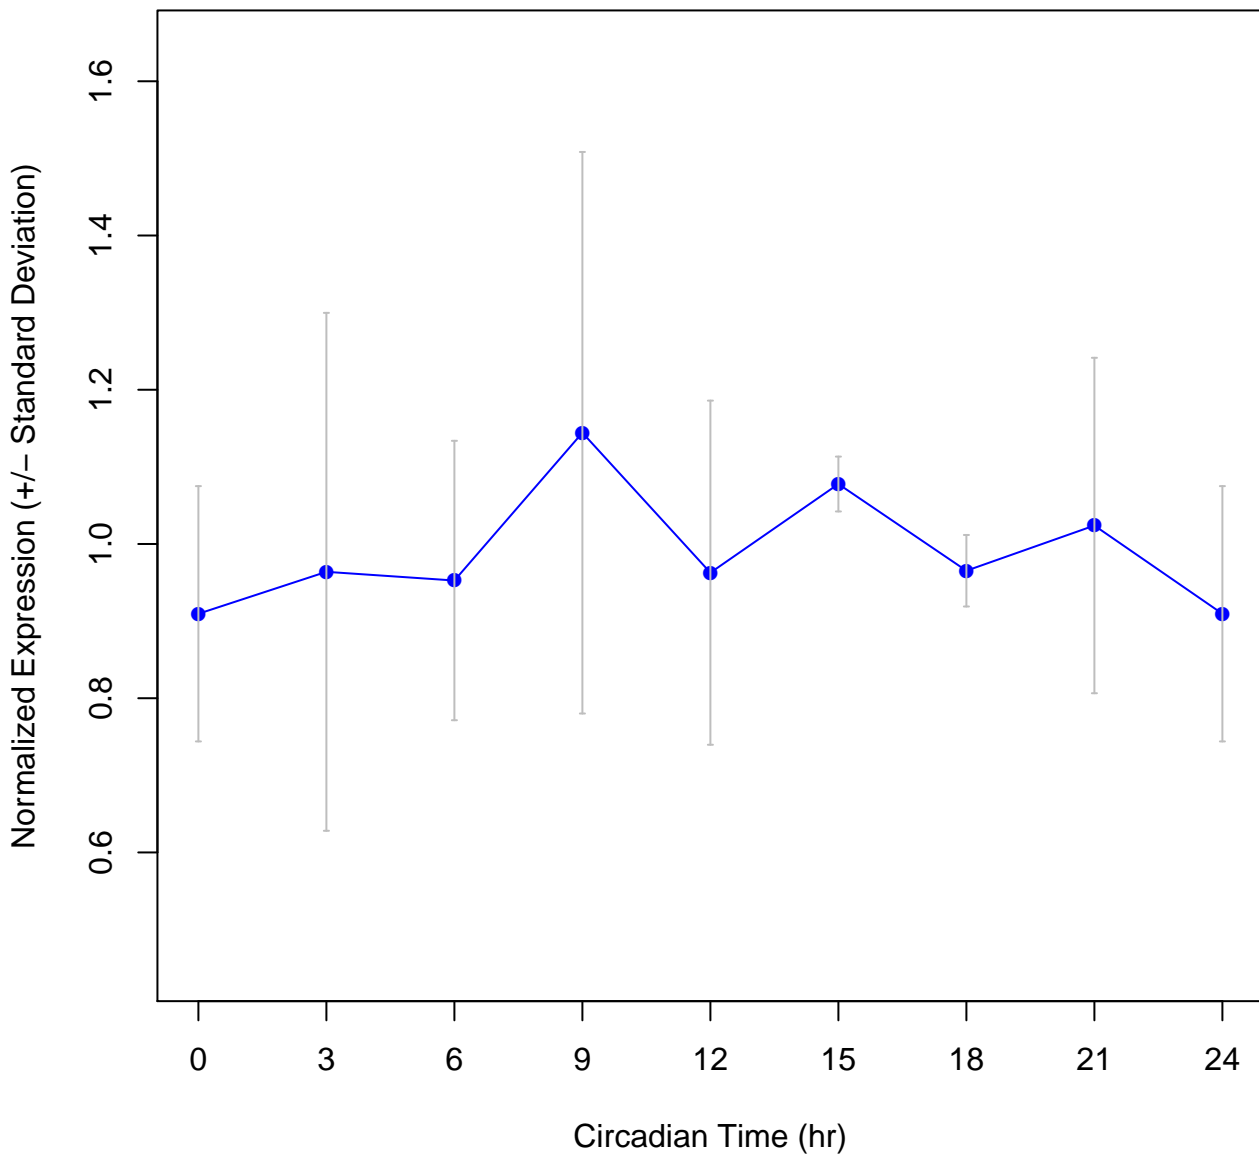

Supplement Figure 4 arhgap19

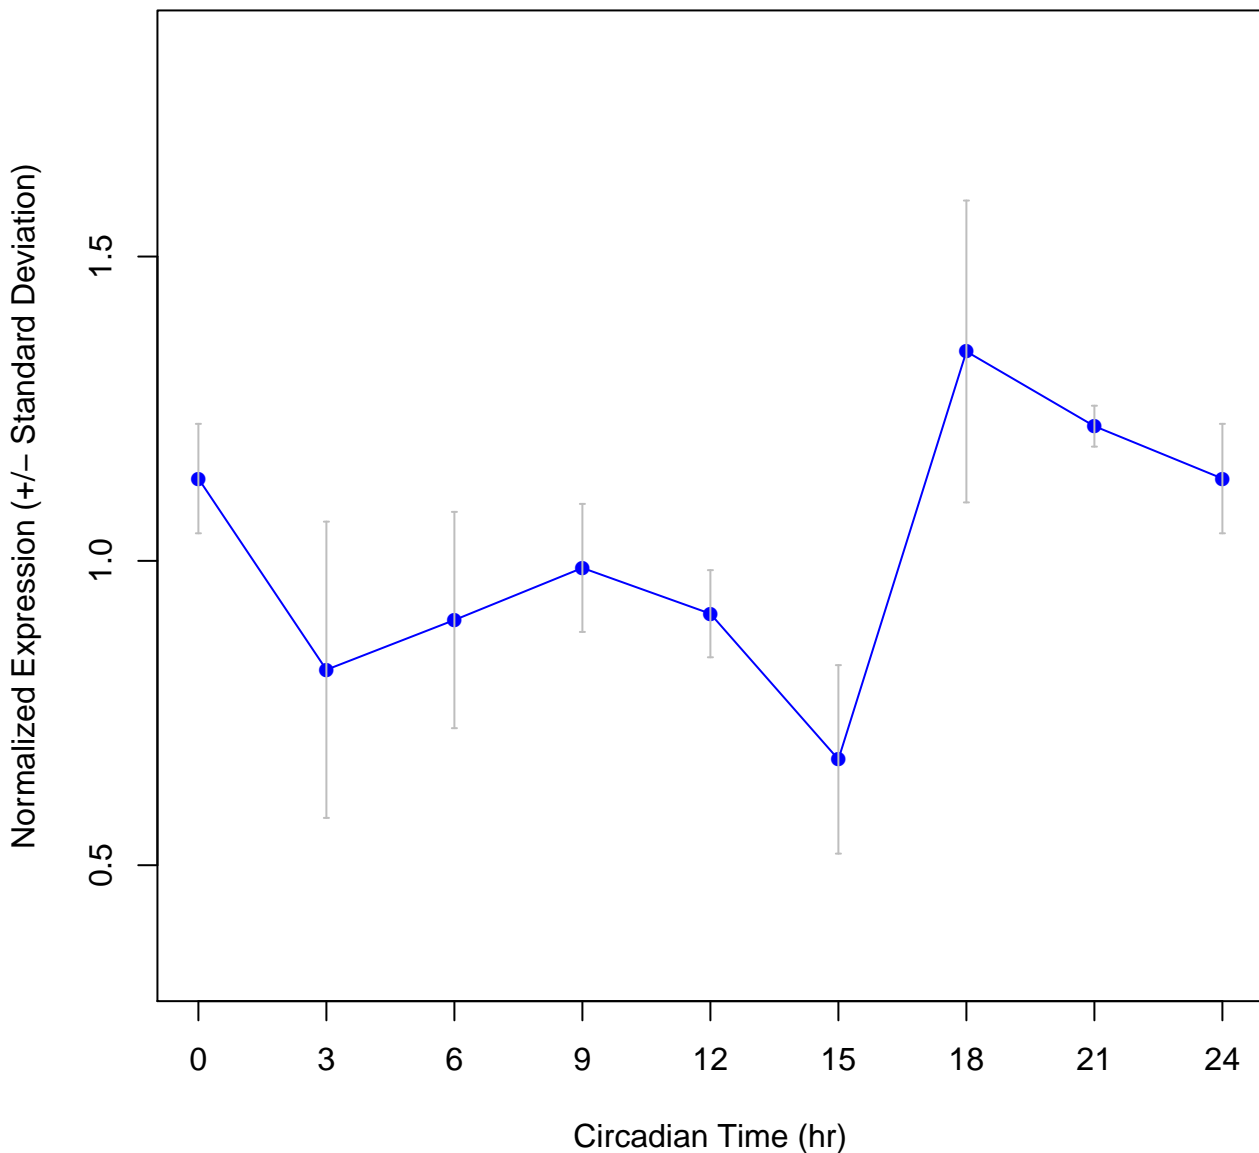

Supplement Figure 4 arid1a

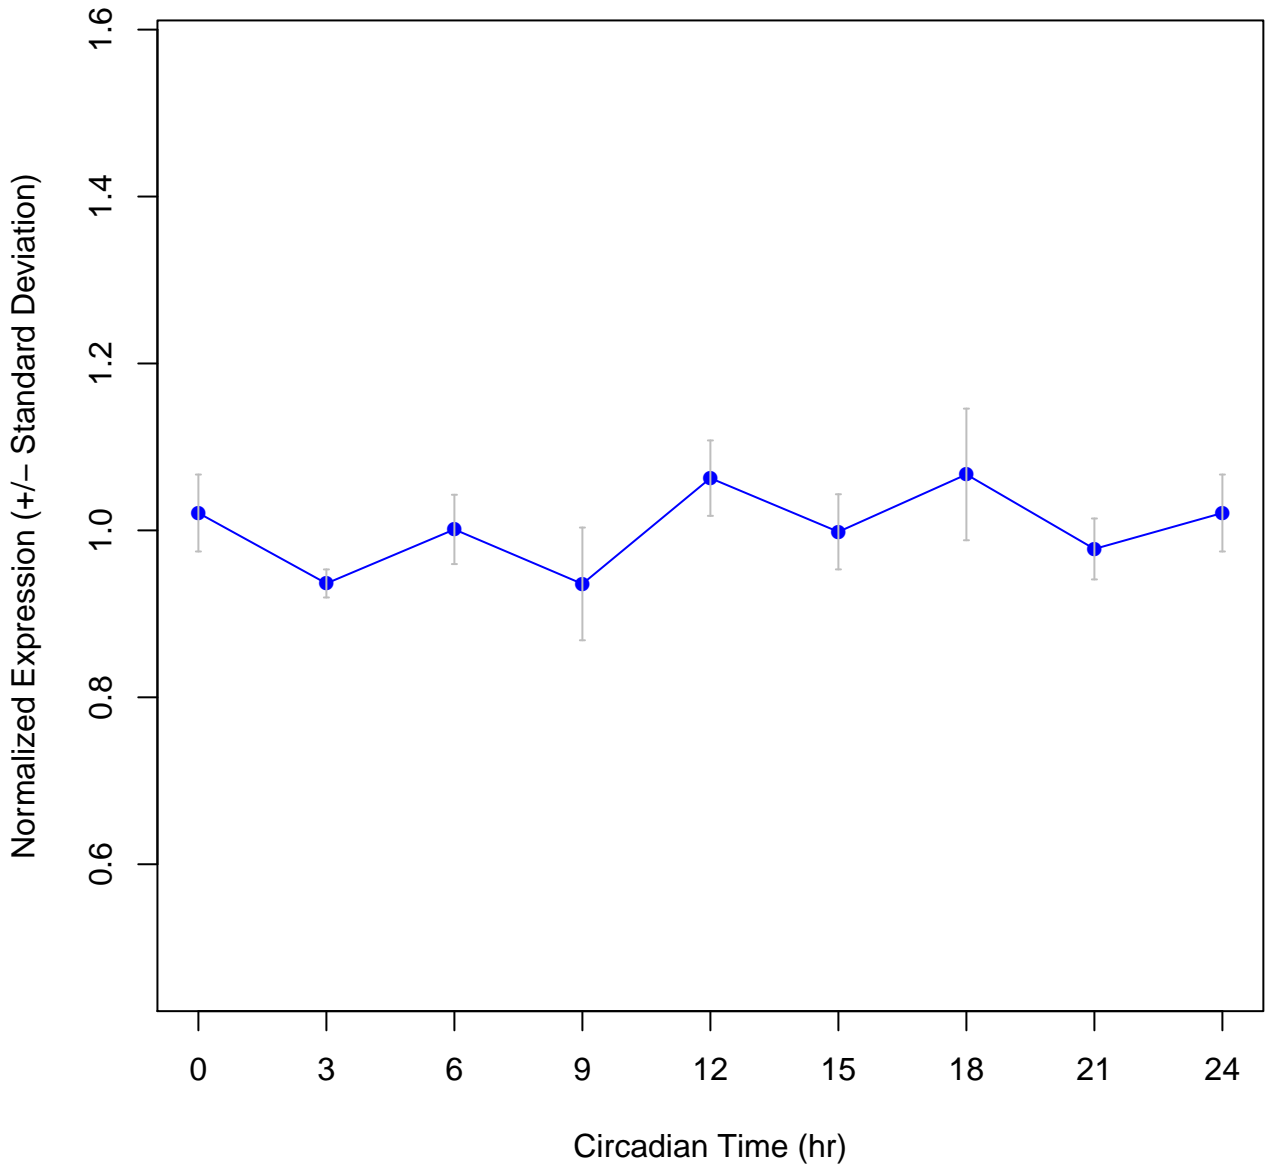

## Supplement Figure 4 ash2l

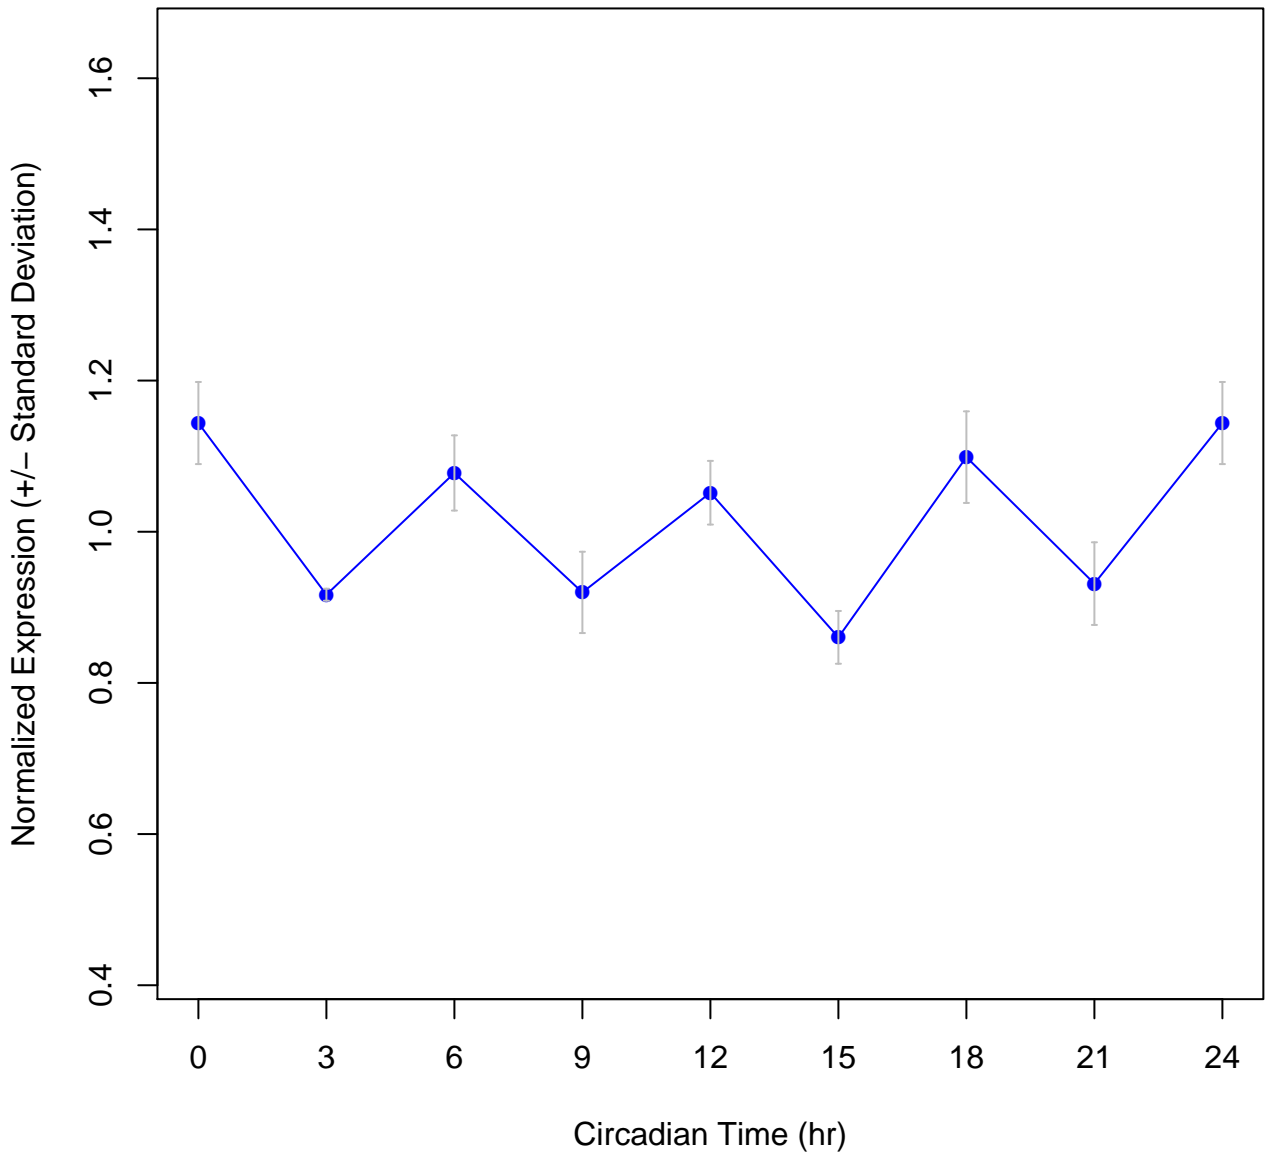

Supplement Figure 4 asic1

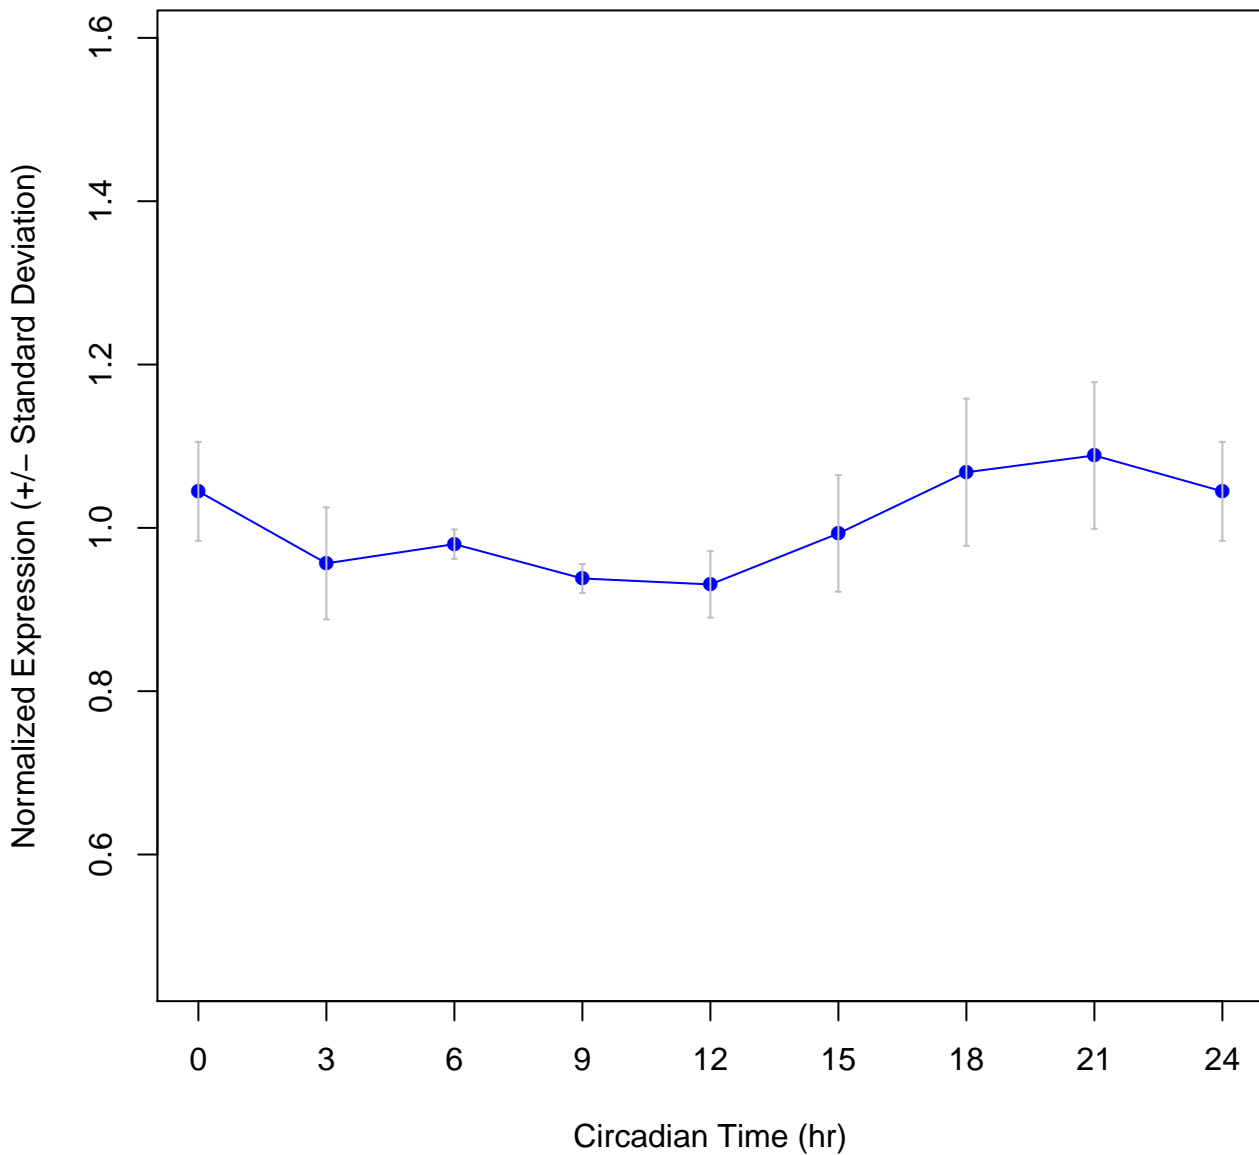

Supplement Figure 4 atm

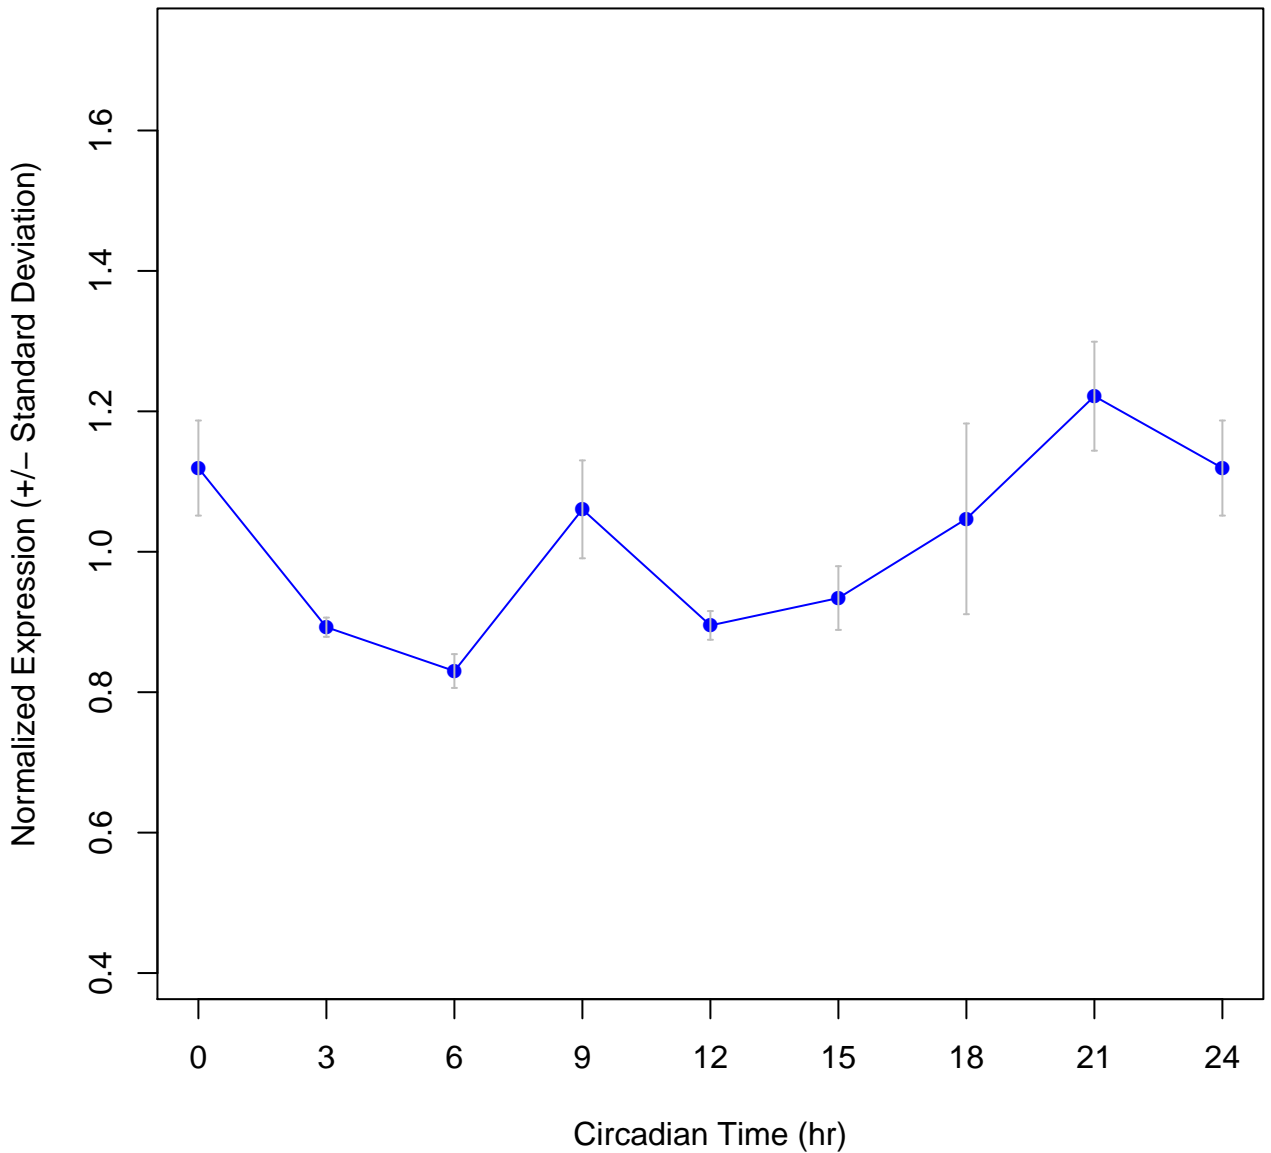



Supplement Figure 4 atp2a1

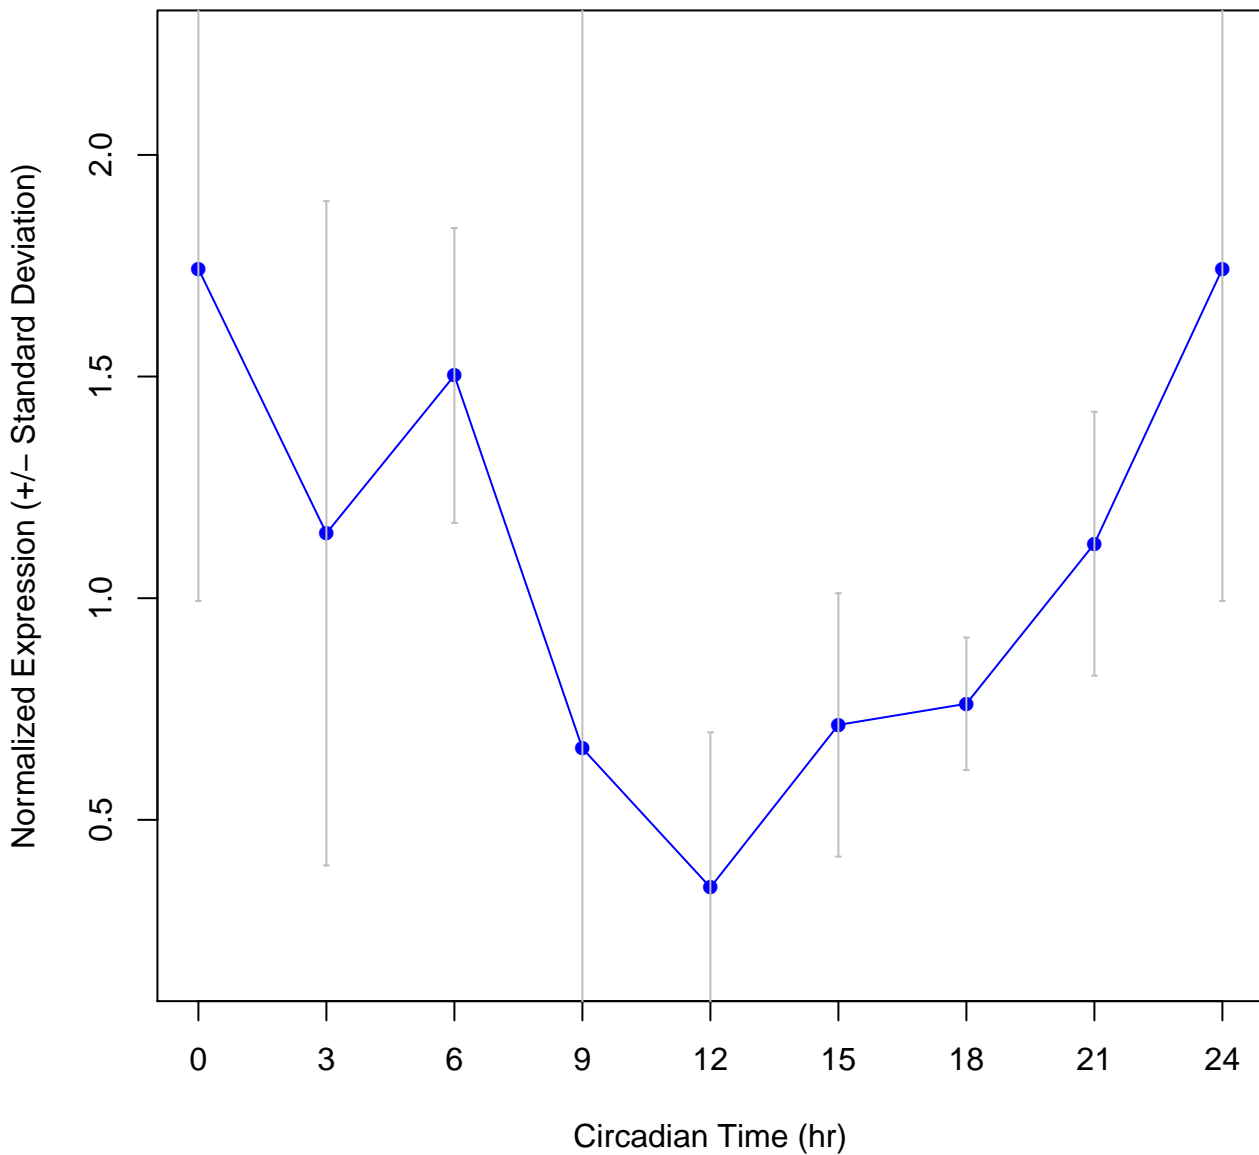

## Supplement Figure 4 aurka

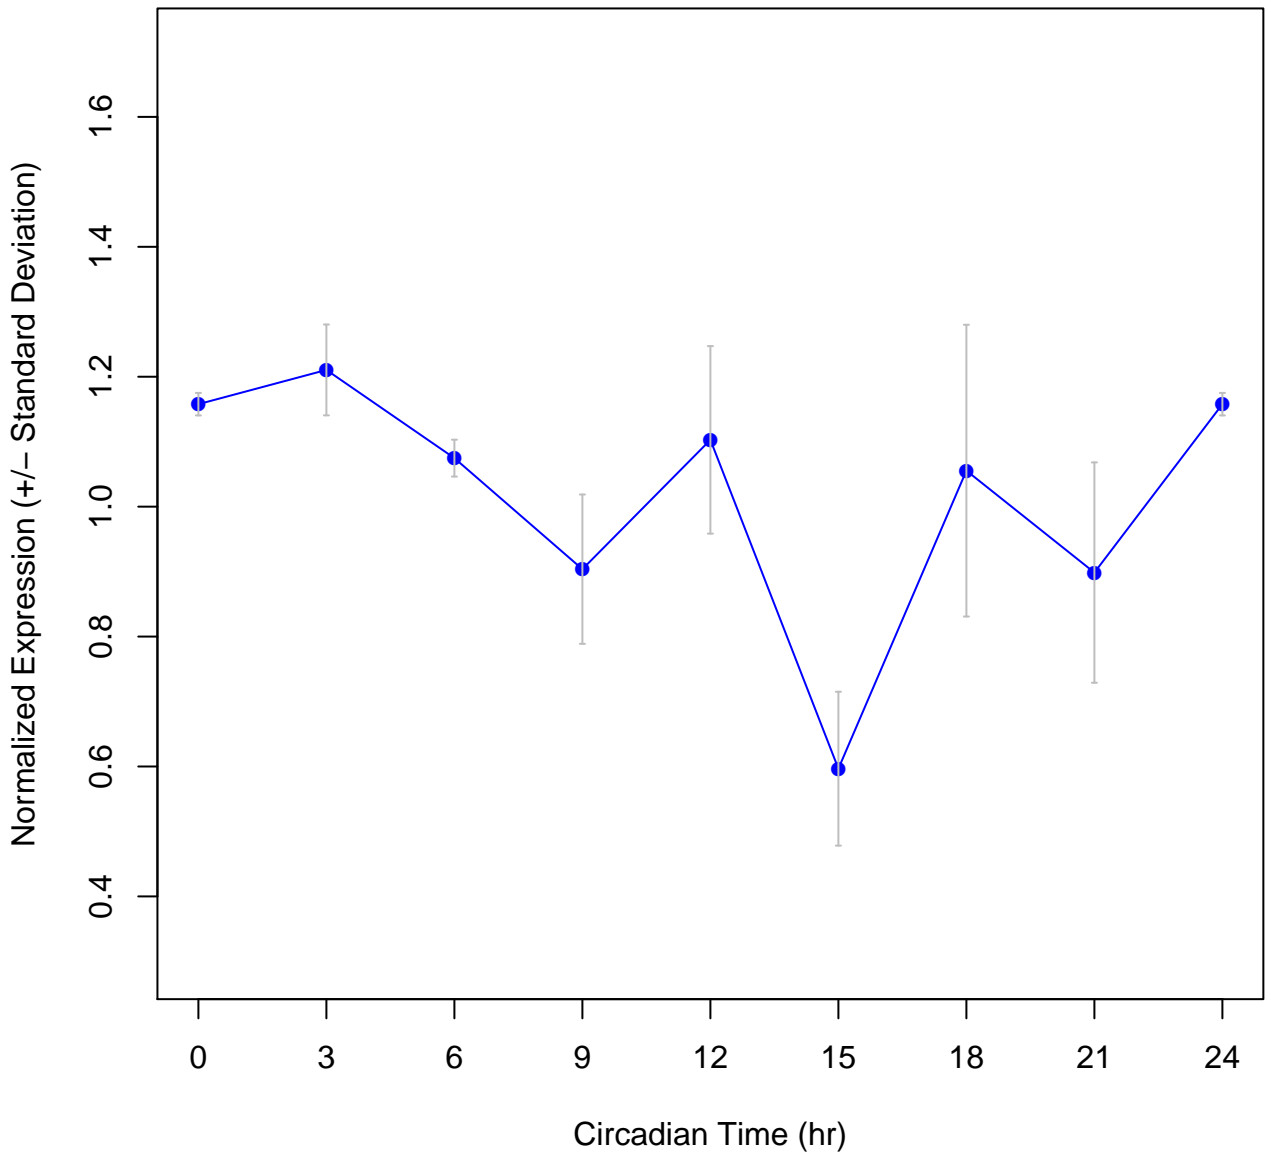

Supplement Figure 4 *bcl1*

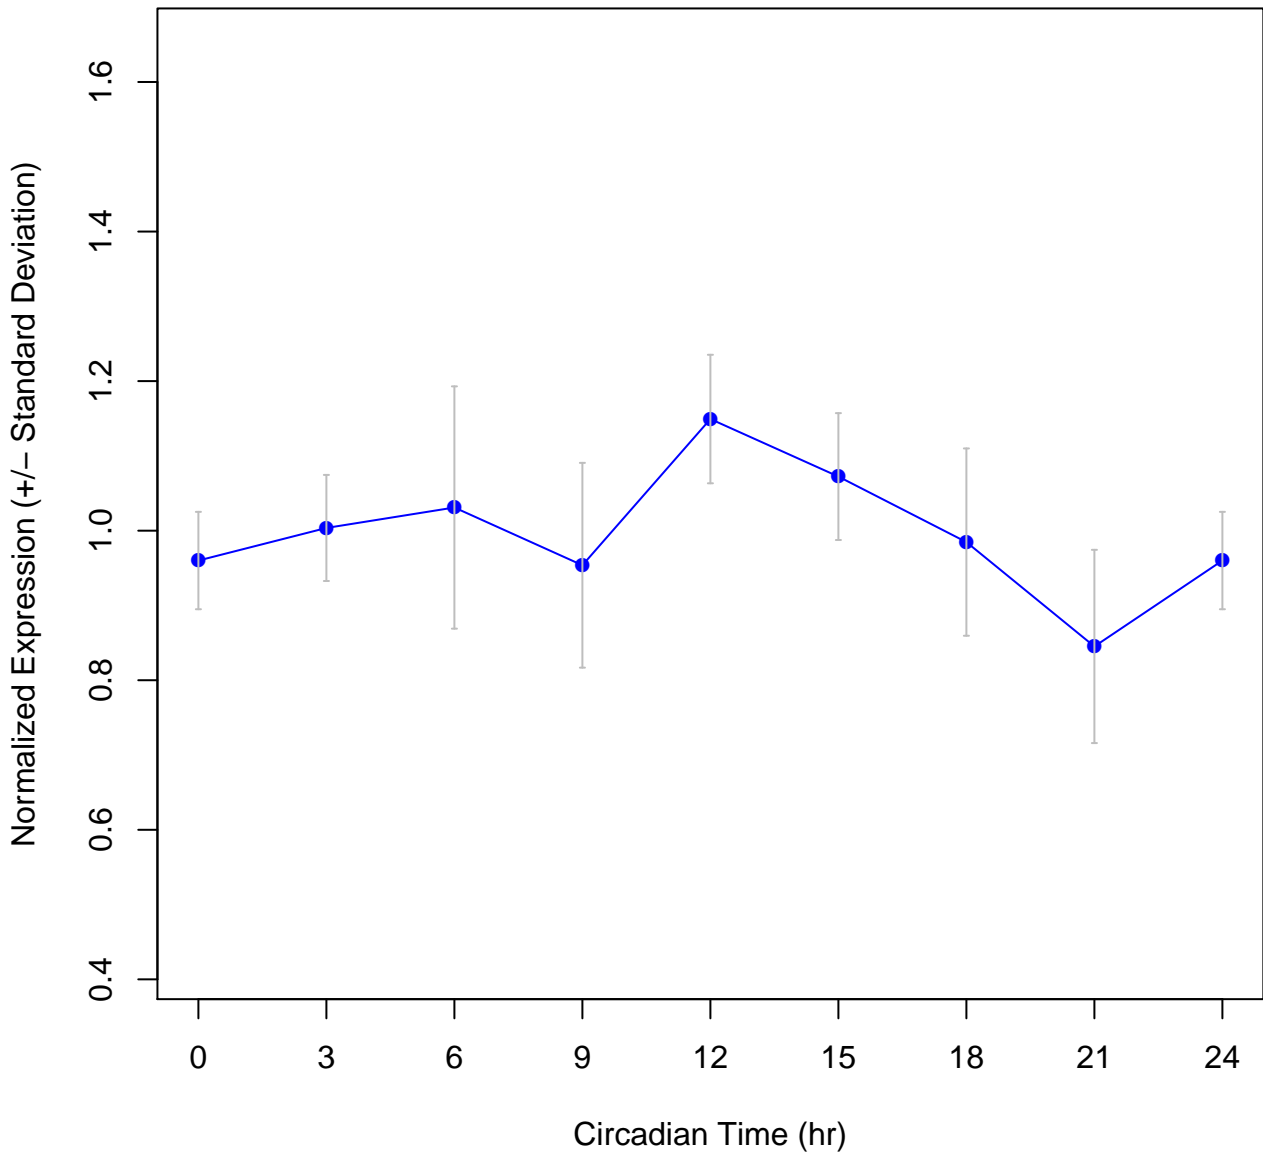

Supplement Figure 4 bcl2

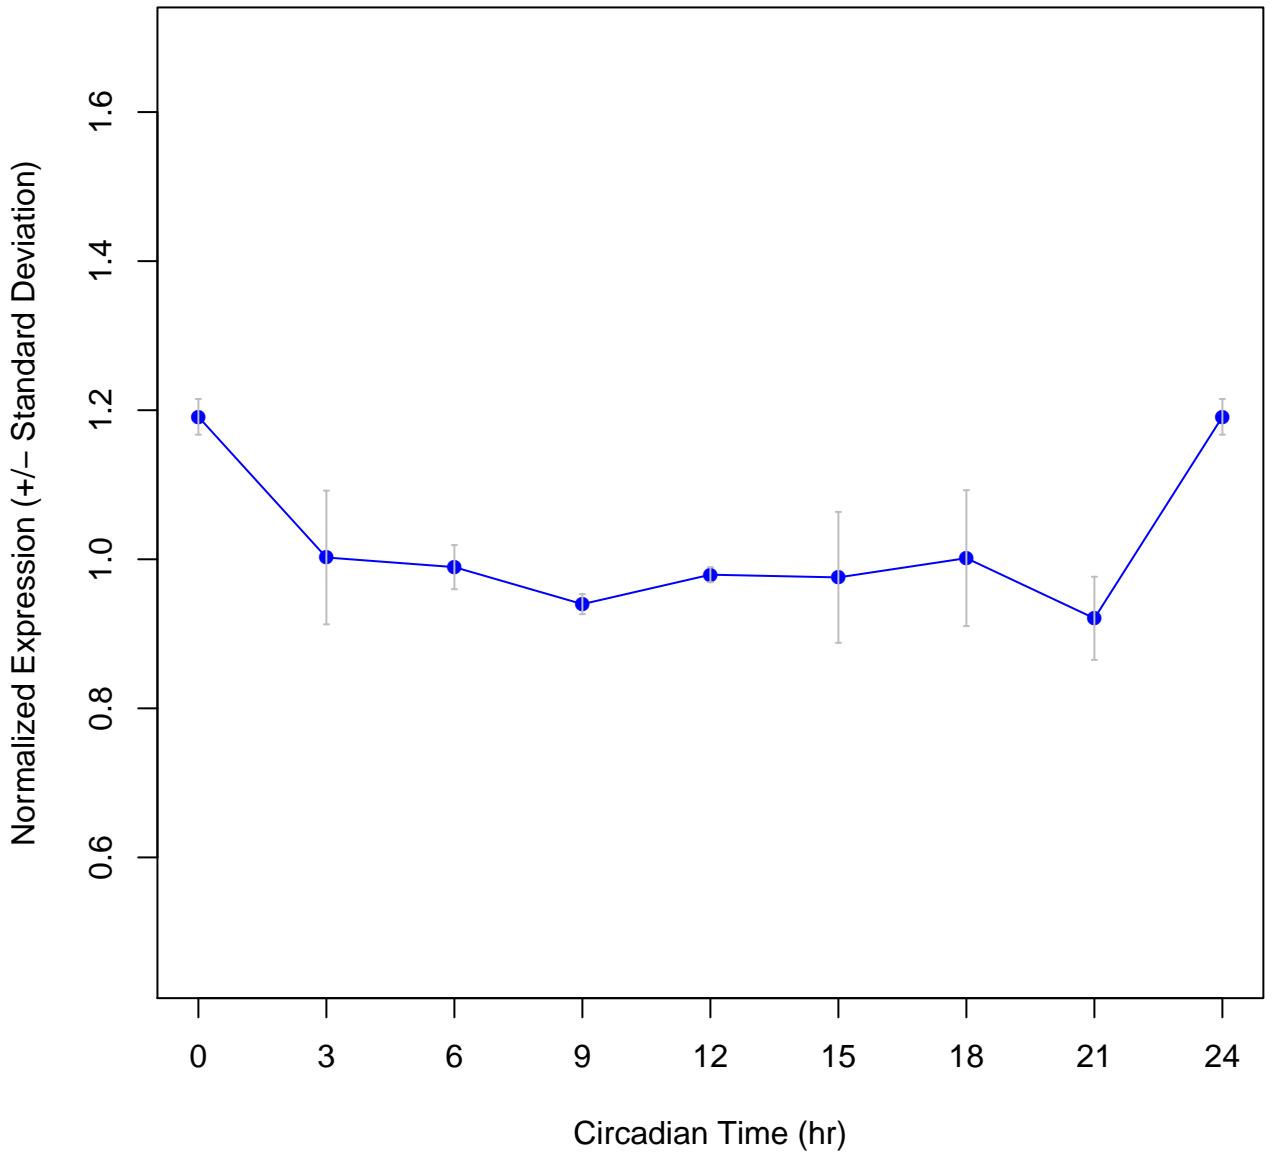

Supplement Figure 4 bhlhe40

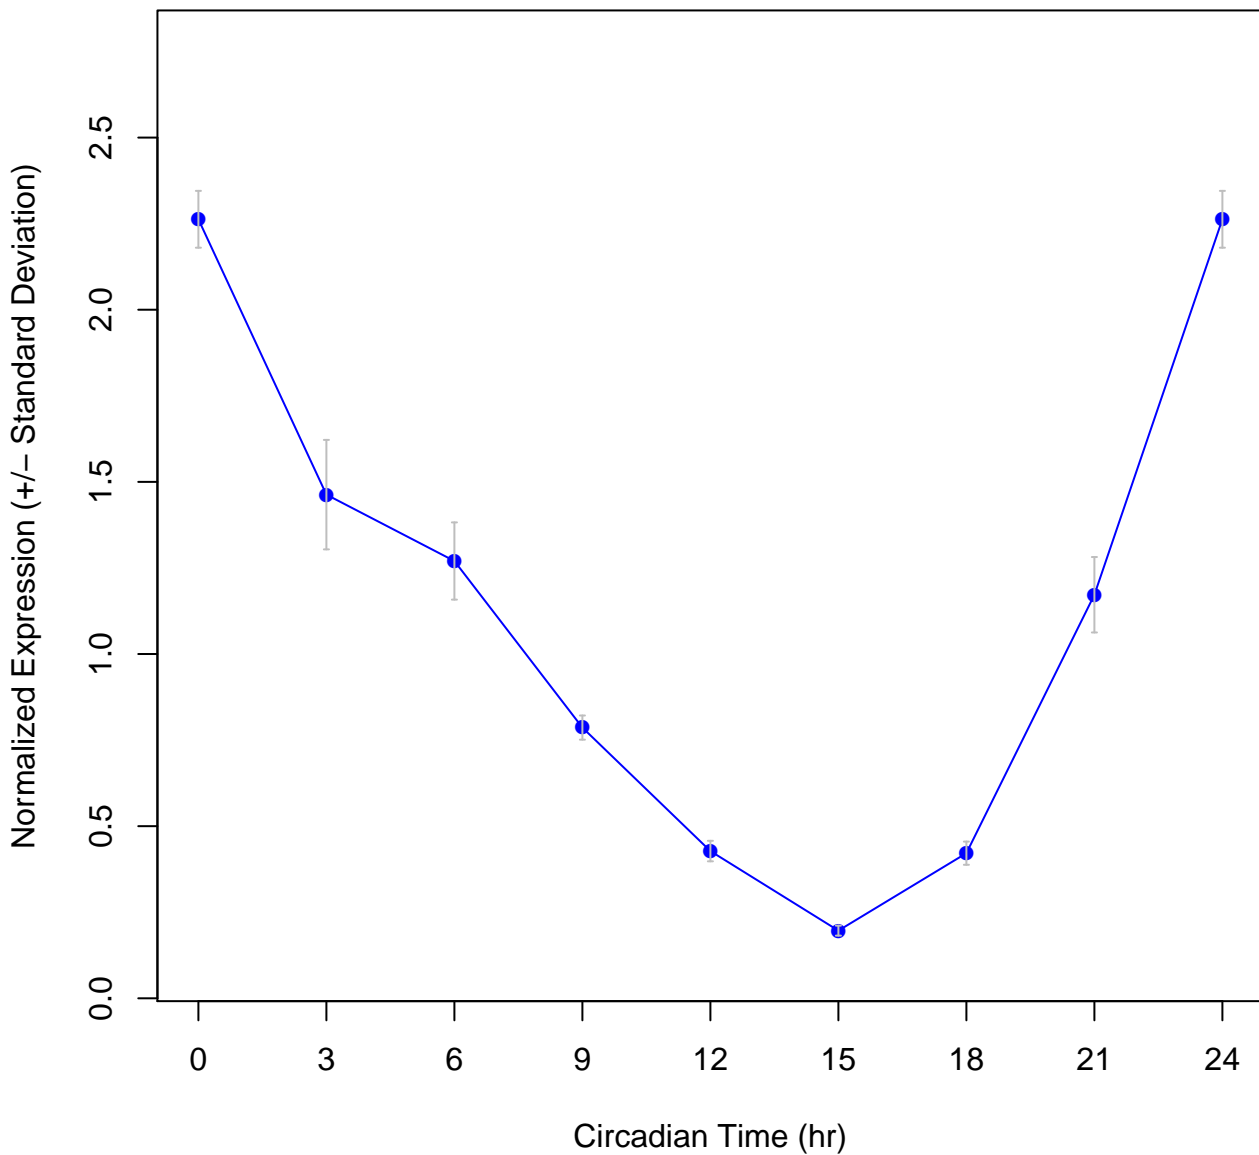

Supplement Figure 4 bmal1

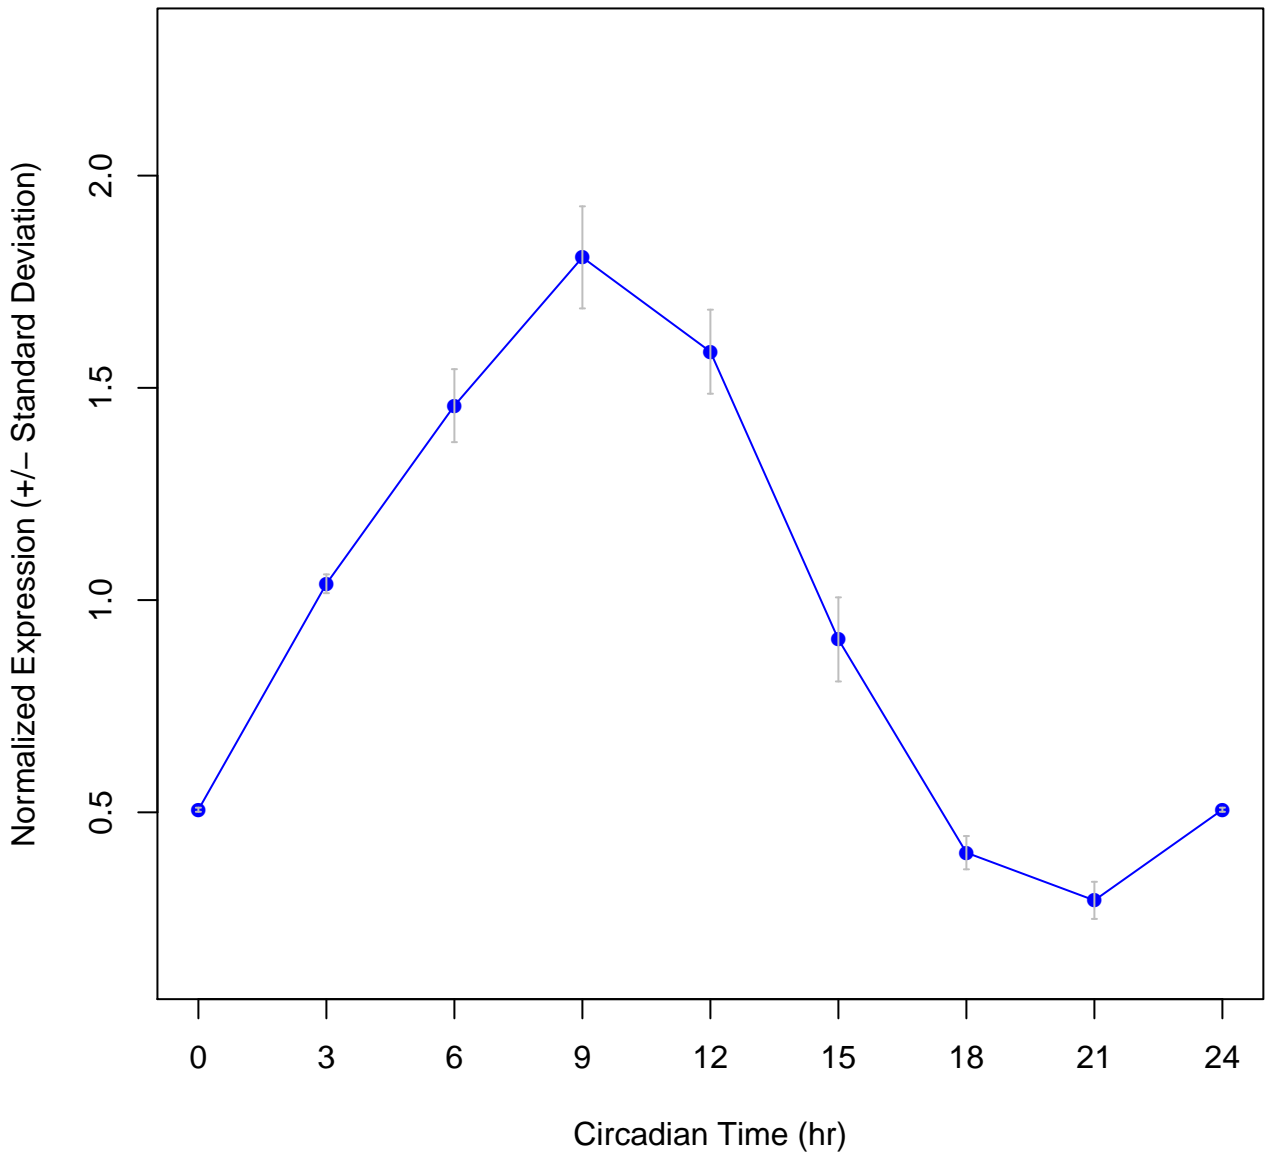

**Supplement Figure 4 bmp7**

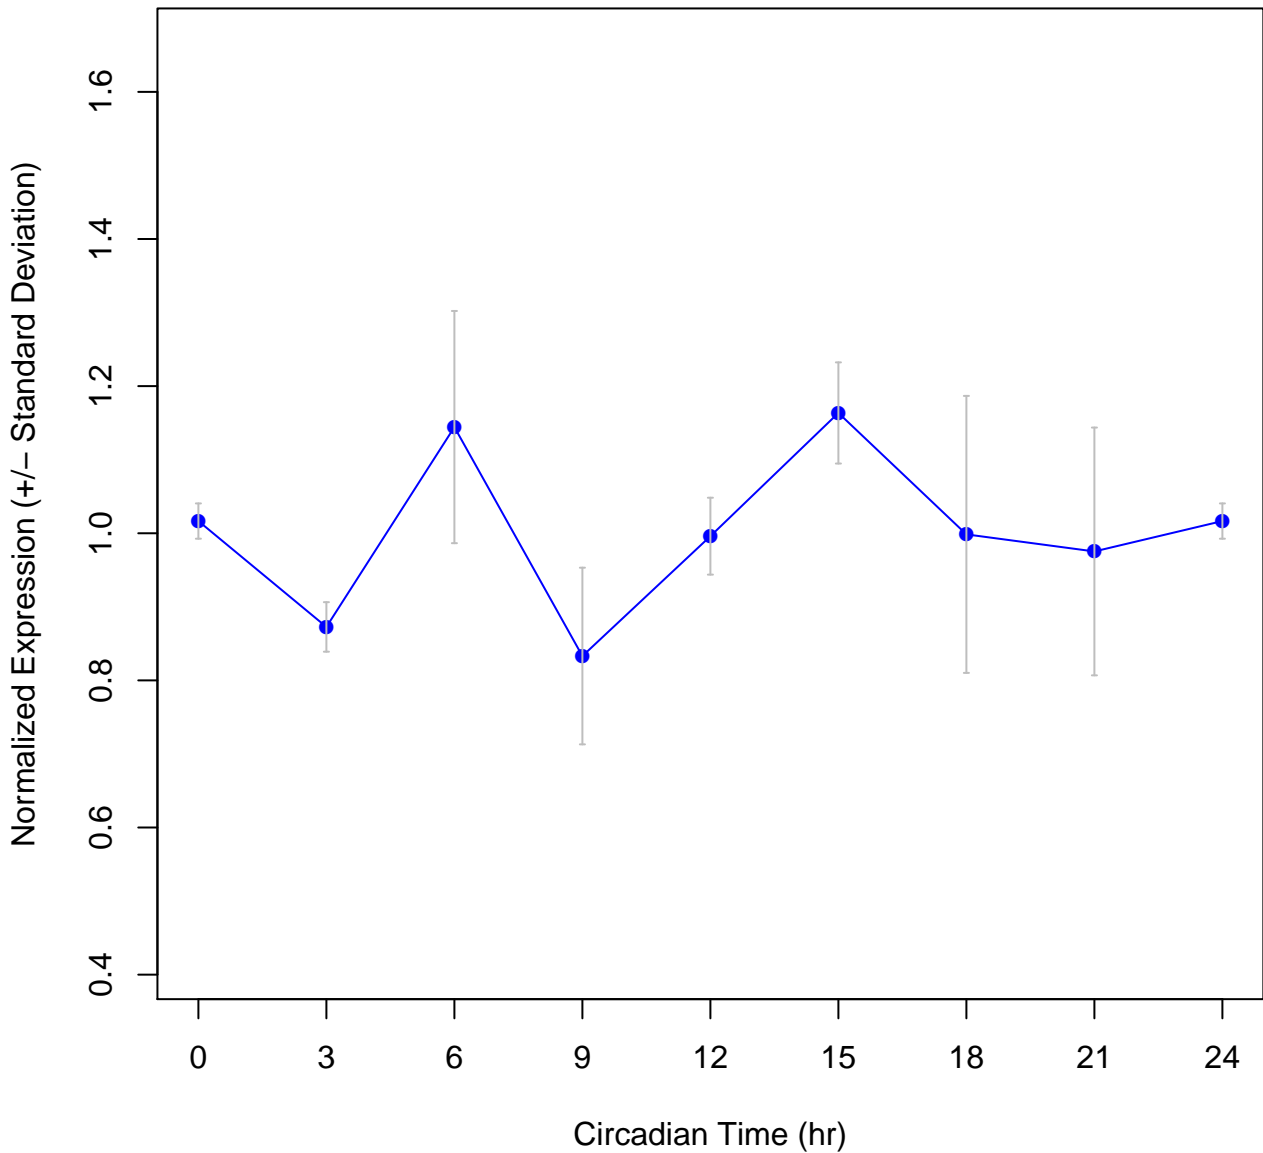

Supplement Figure 4 bmpr1b

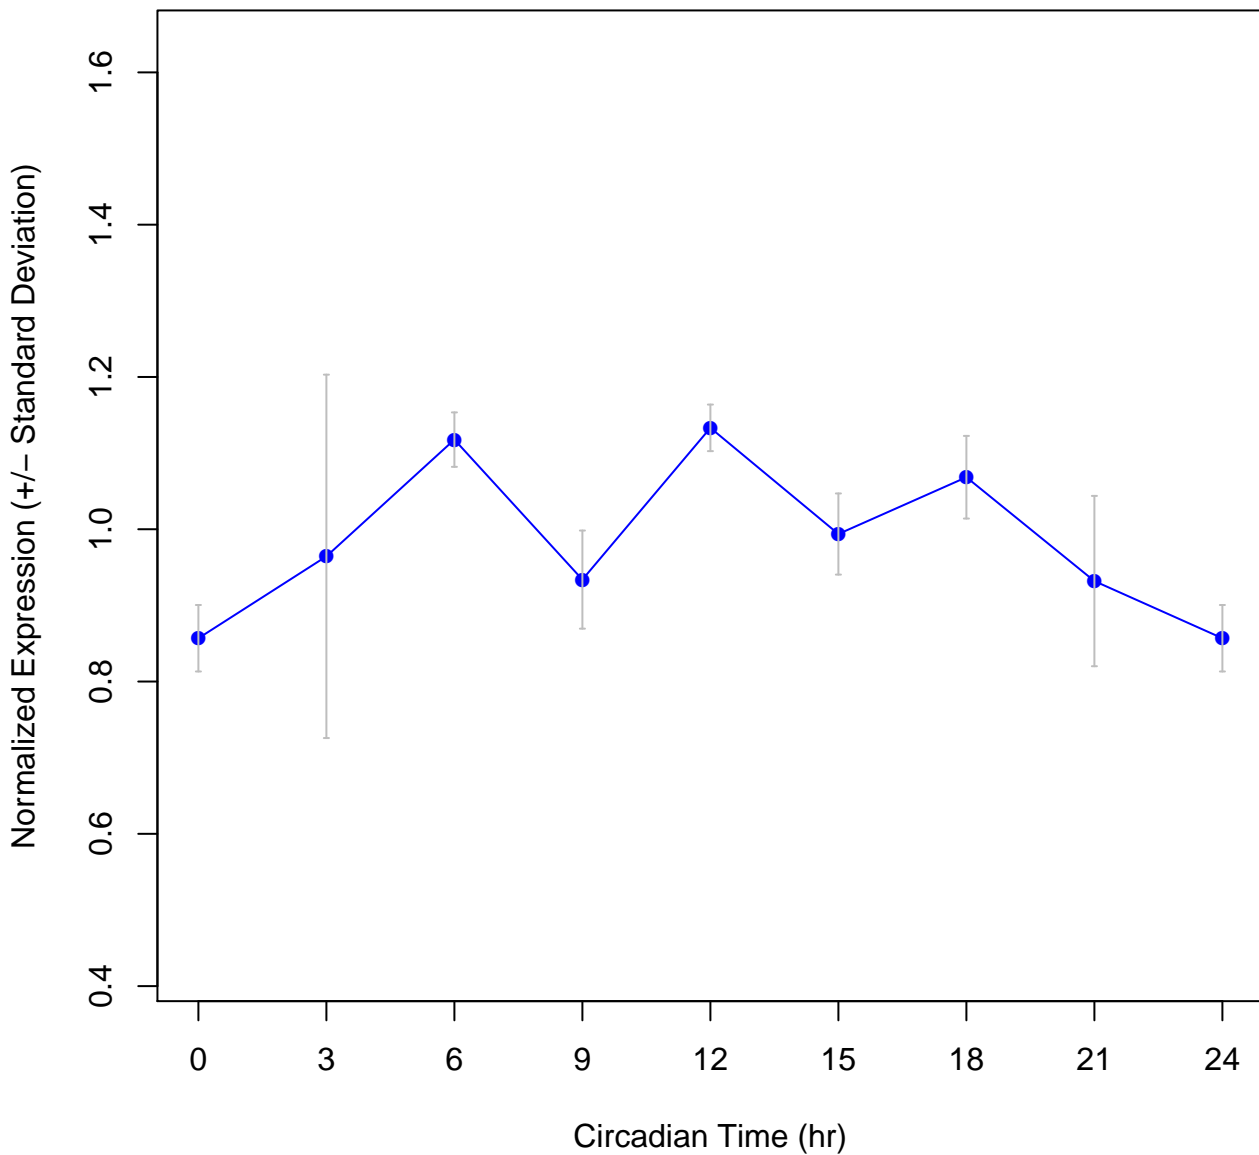



Supplement Figure 4 bora

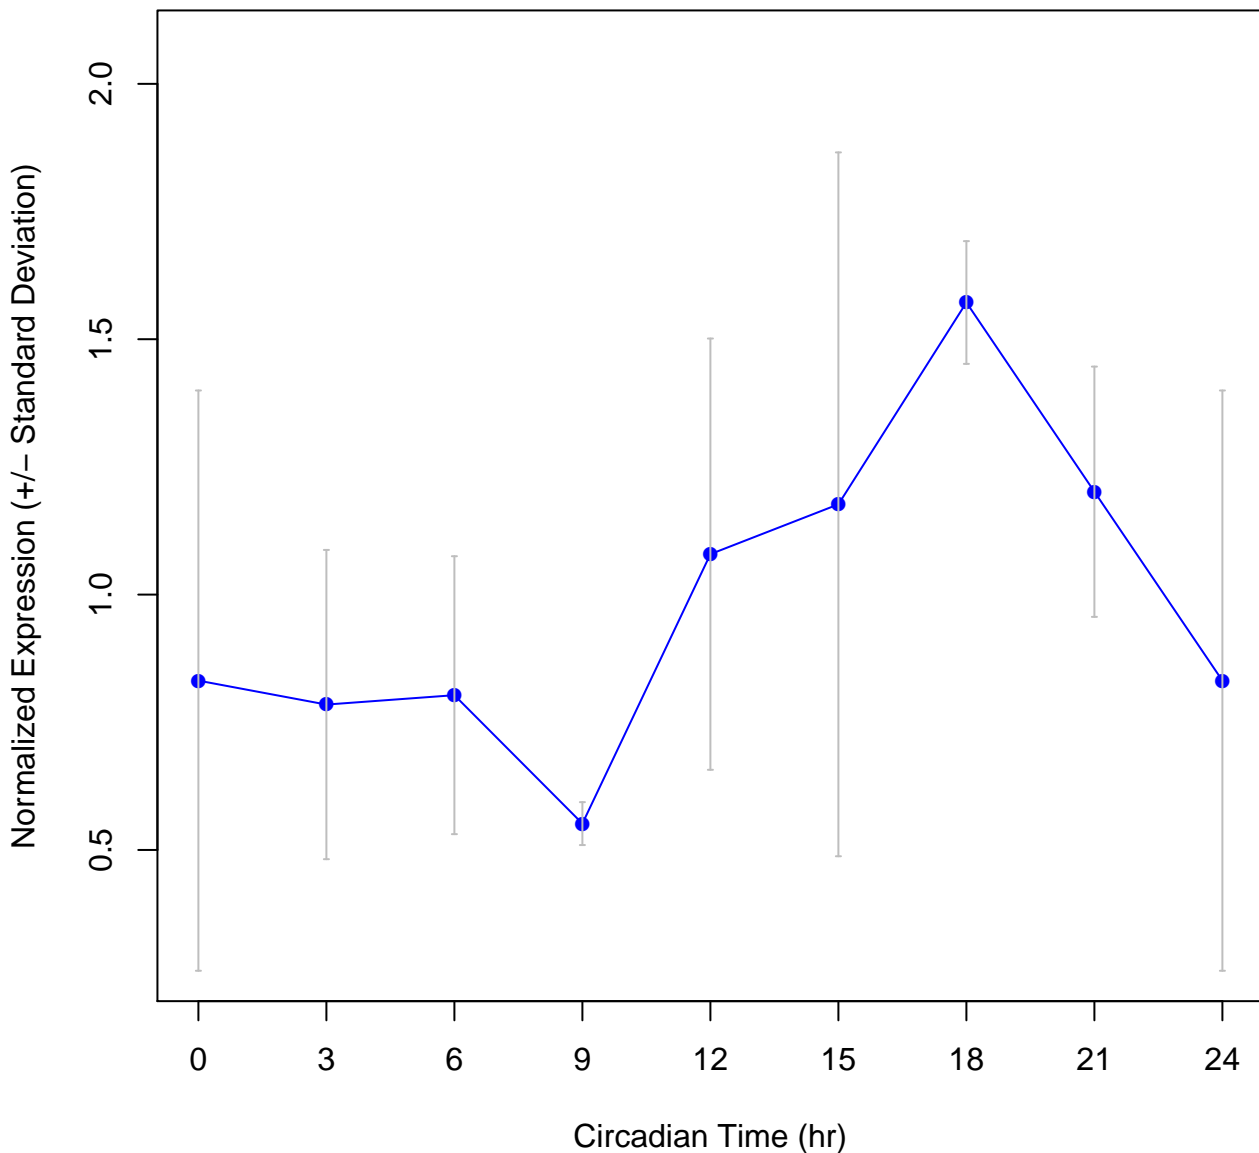

## Supplement Figure 4 brca2

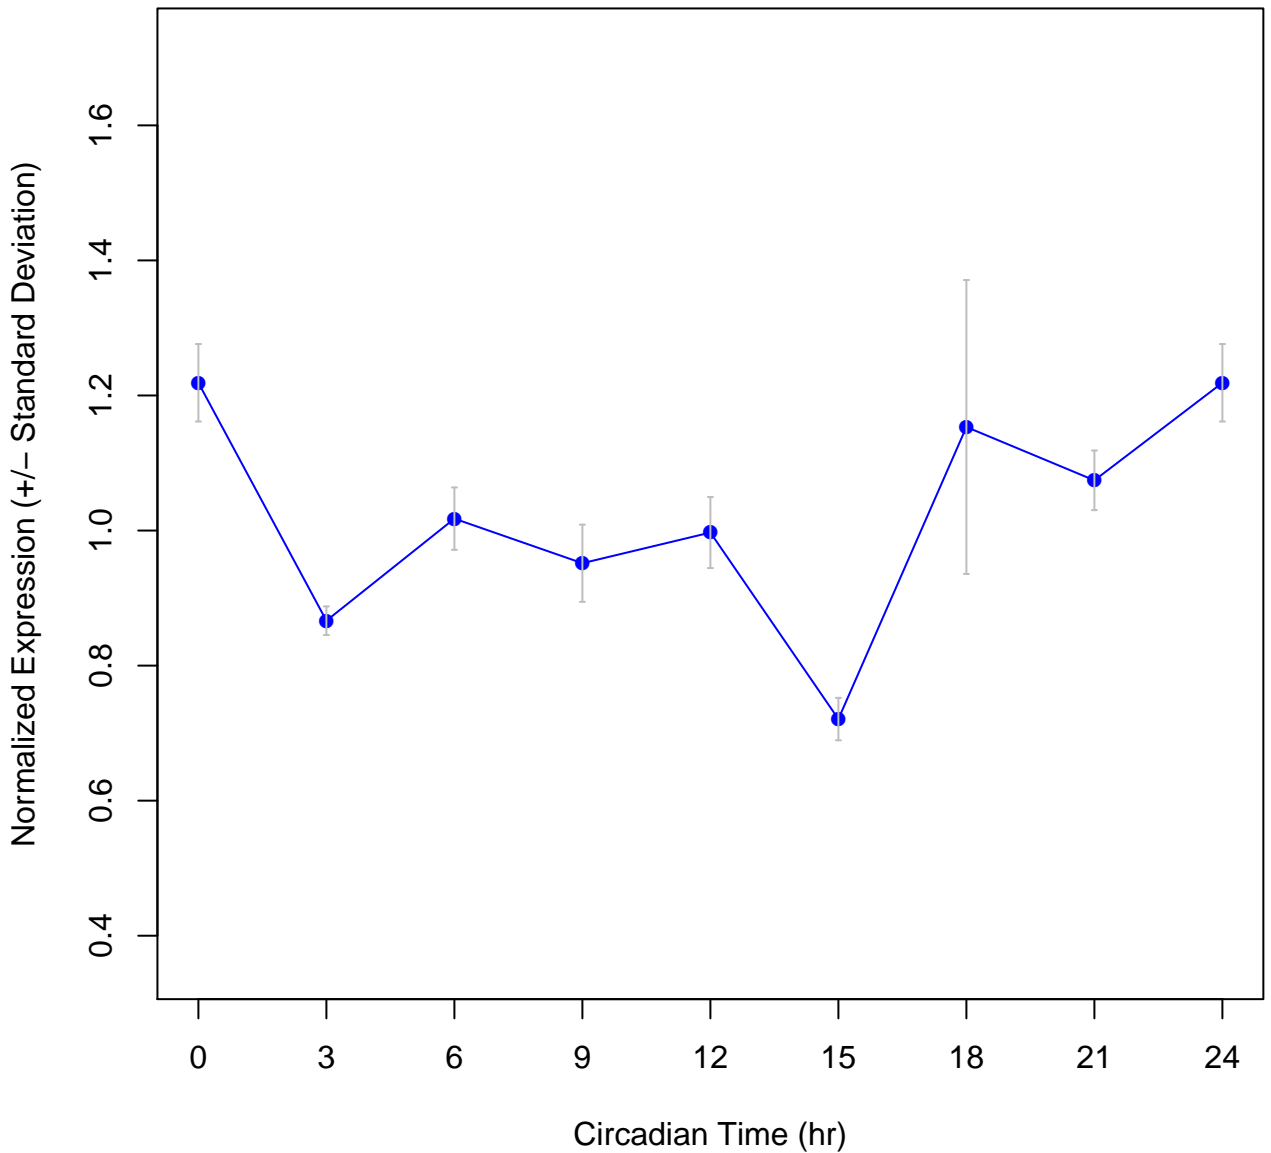

Supplement Figure 4 camk1g

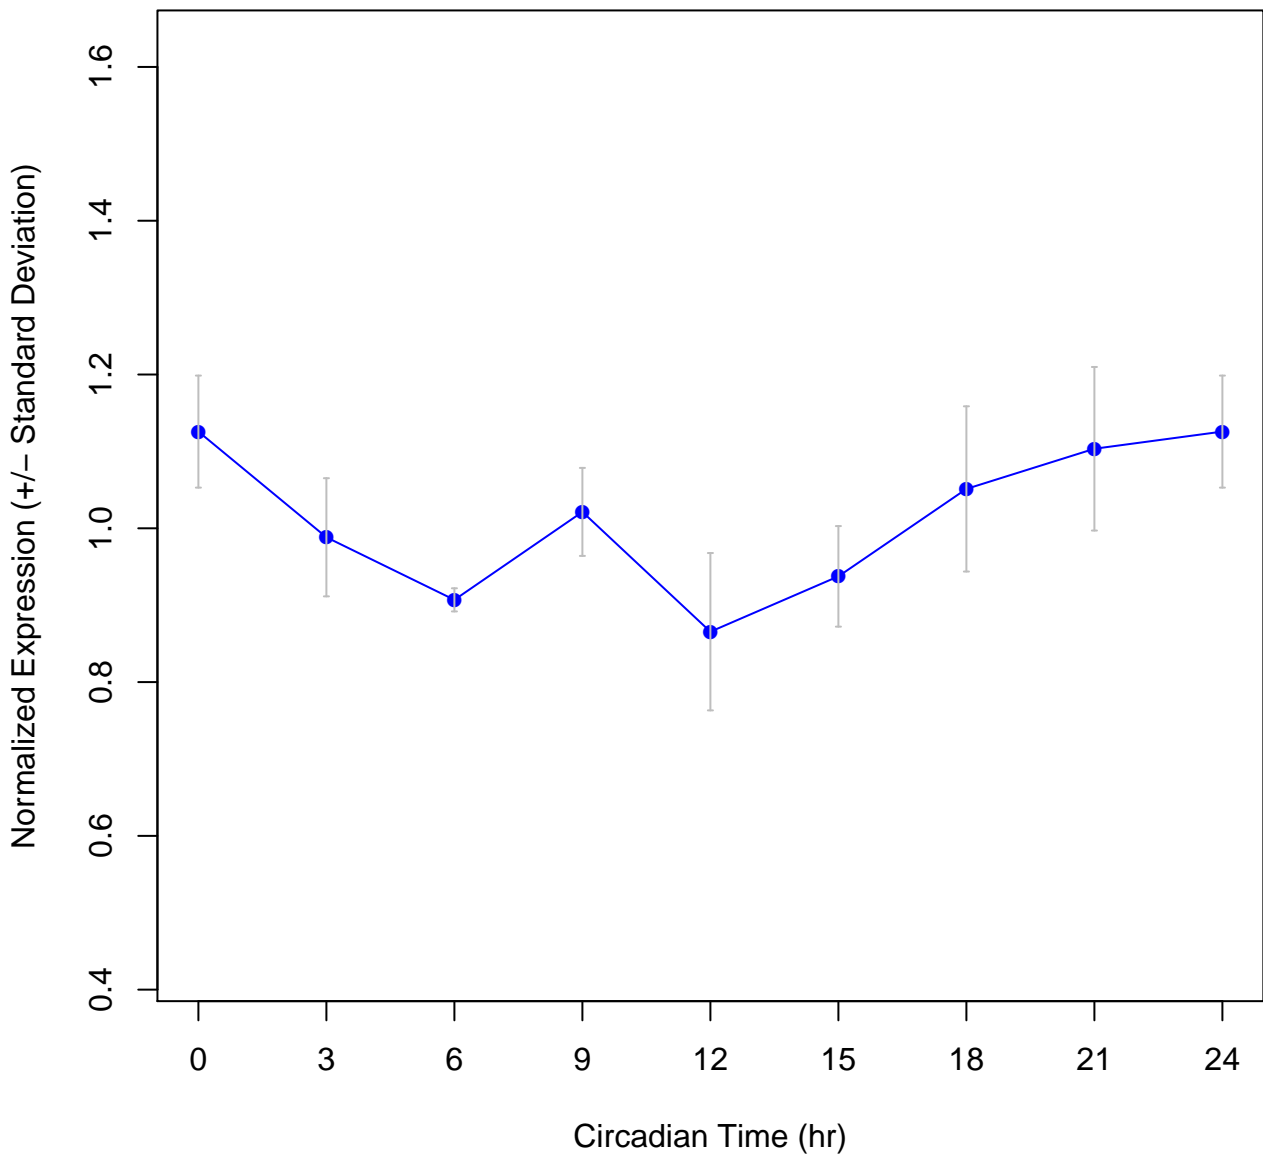

Supplement Figure 4 camk2a

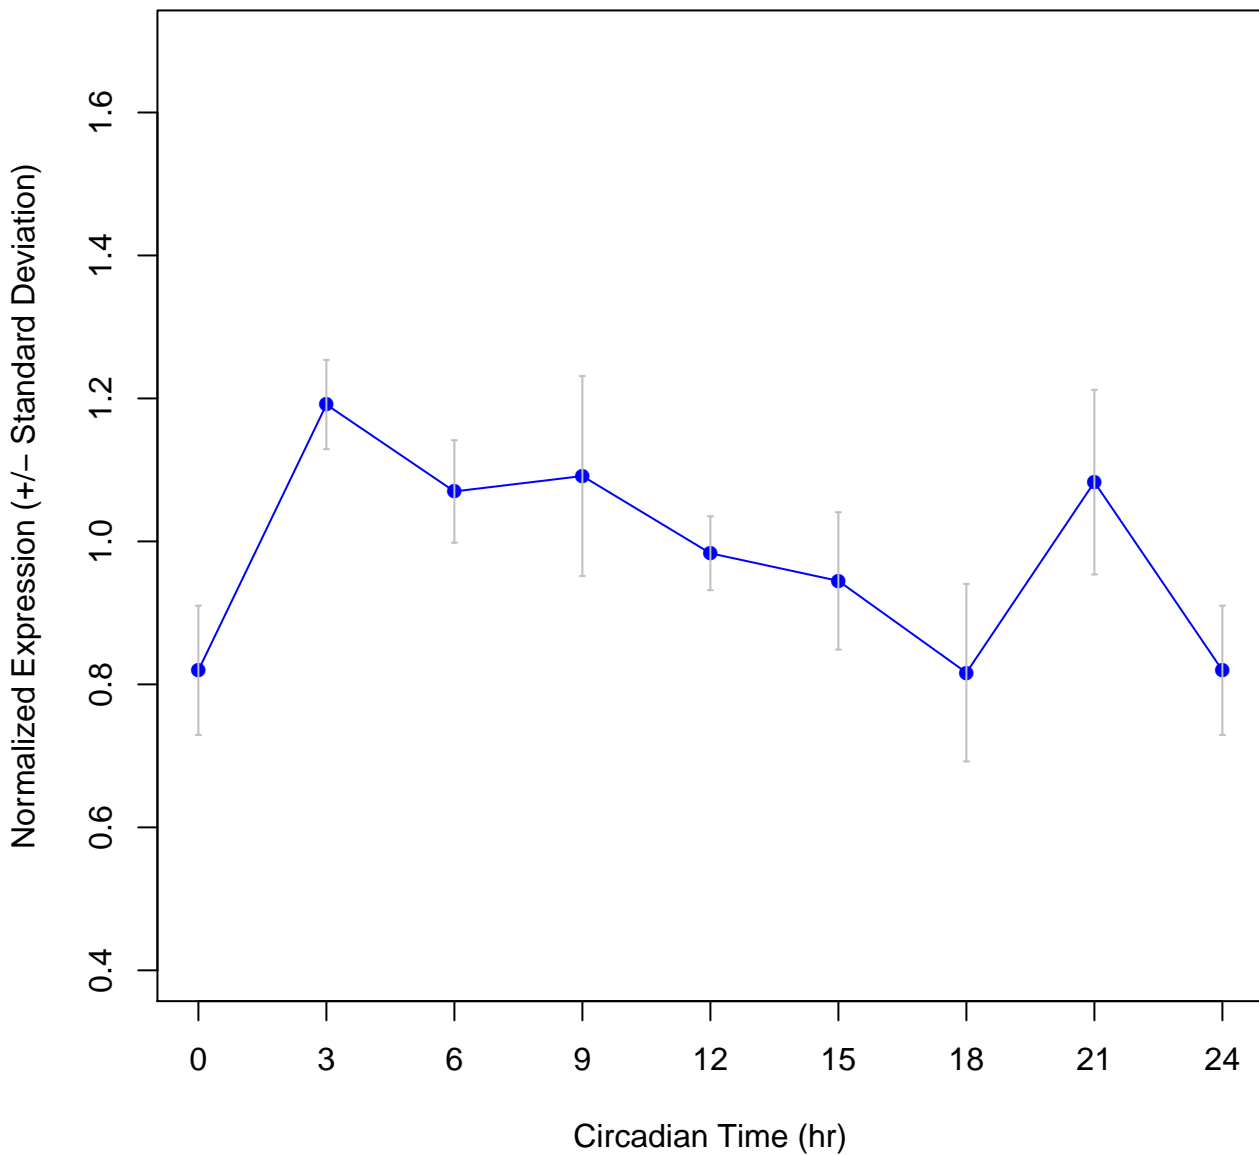

Supplement Figure 4 ccnb1

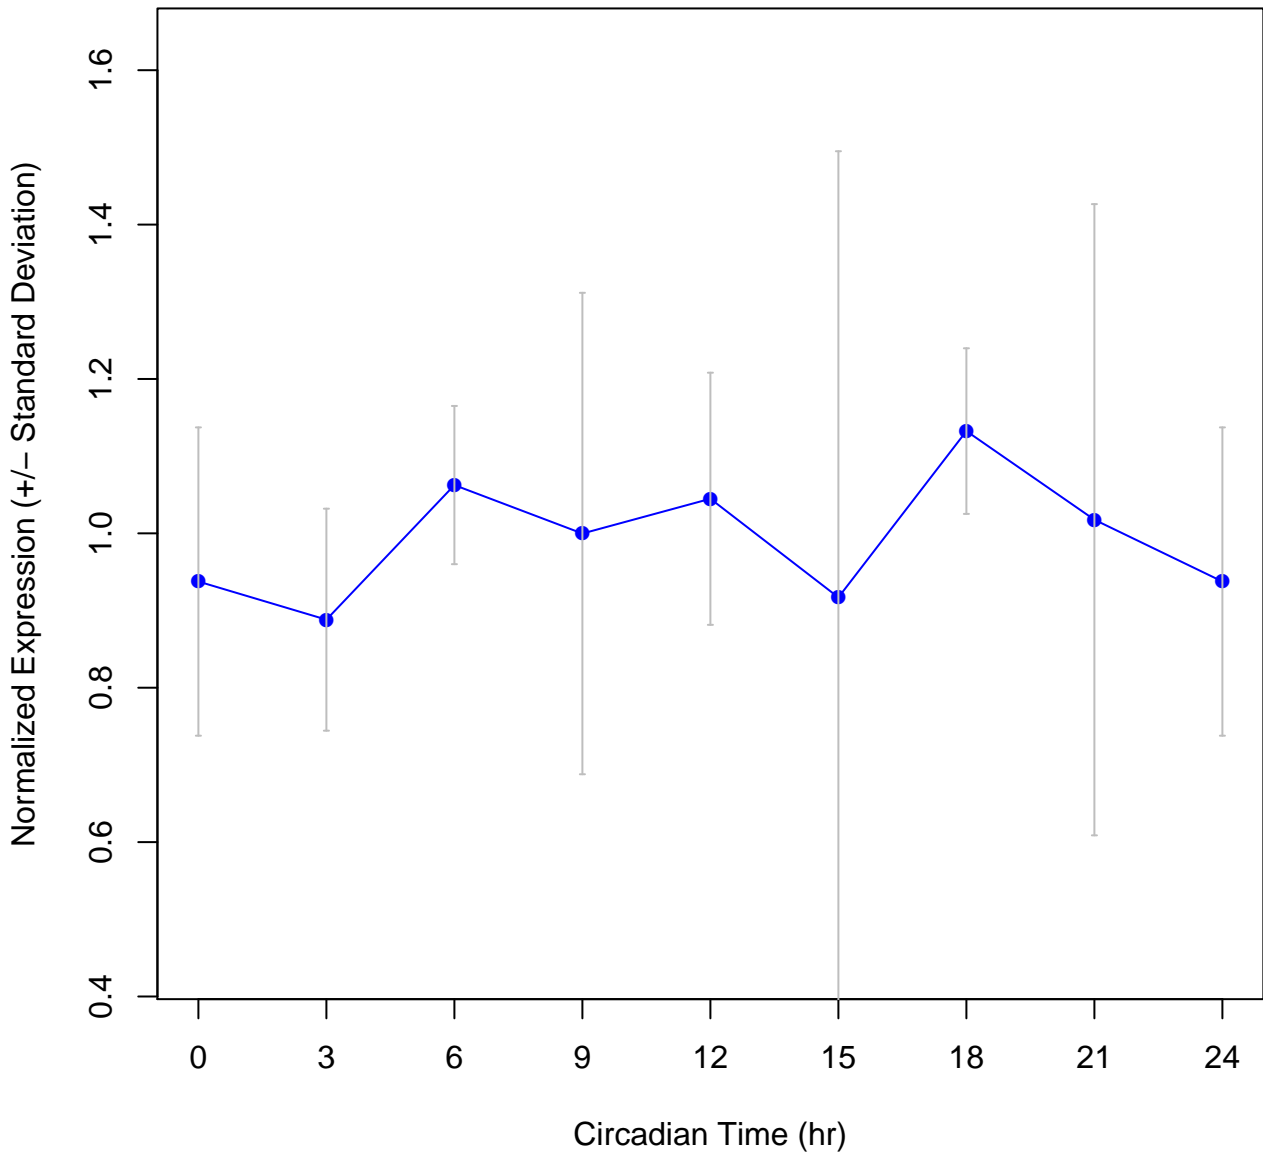

Supplement Figure 4 ccnb2

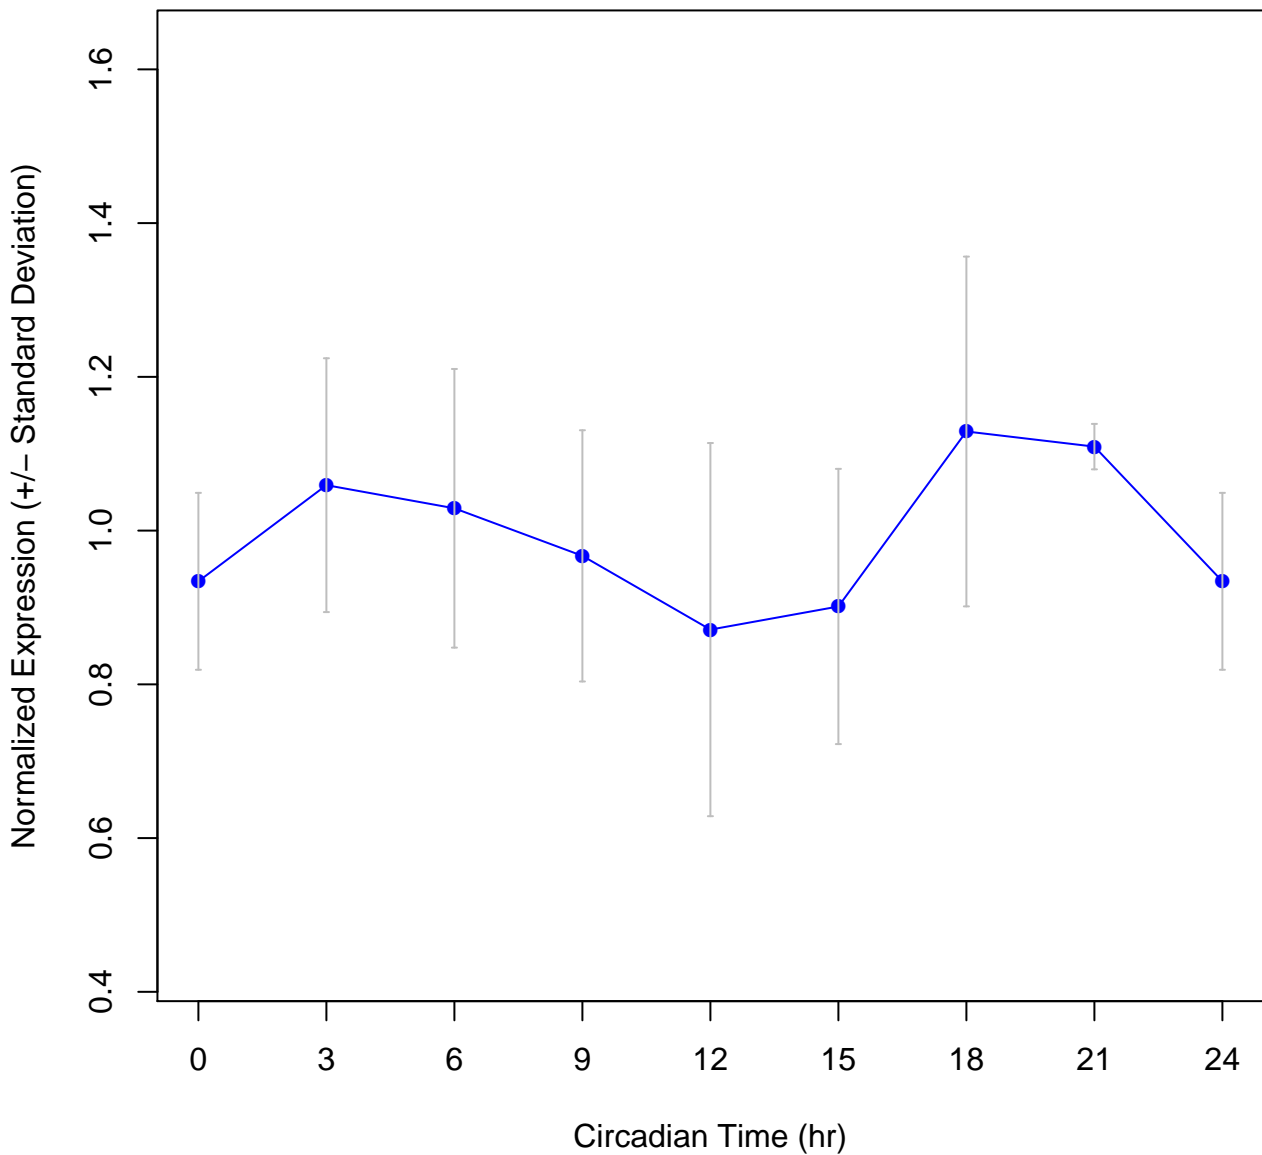

### Supplement Figure 4 ccnb3

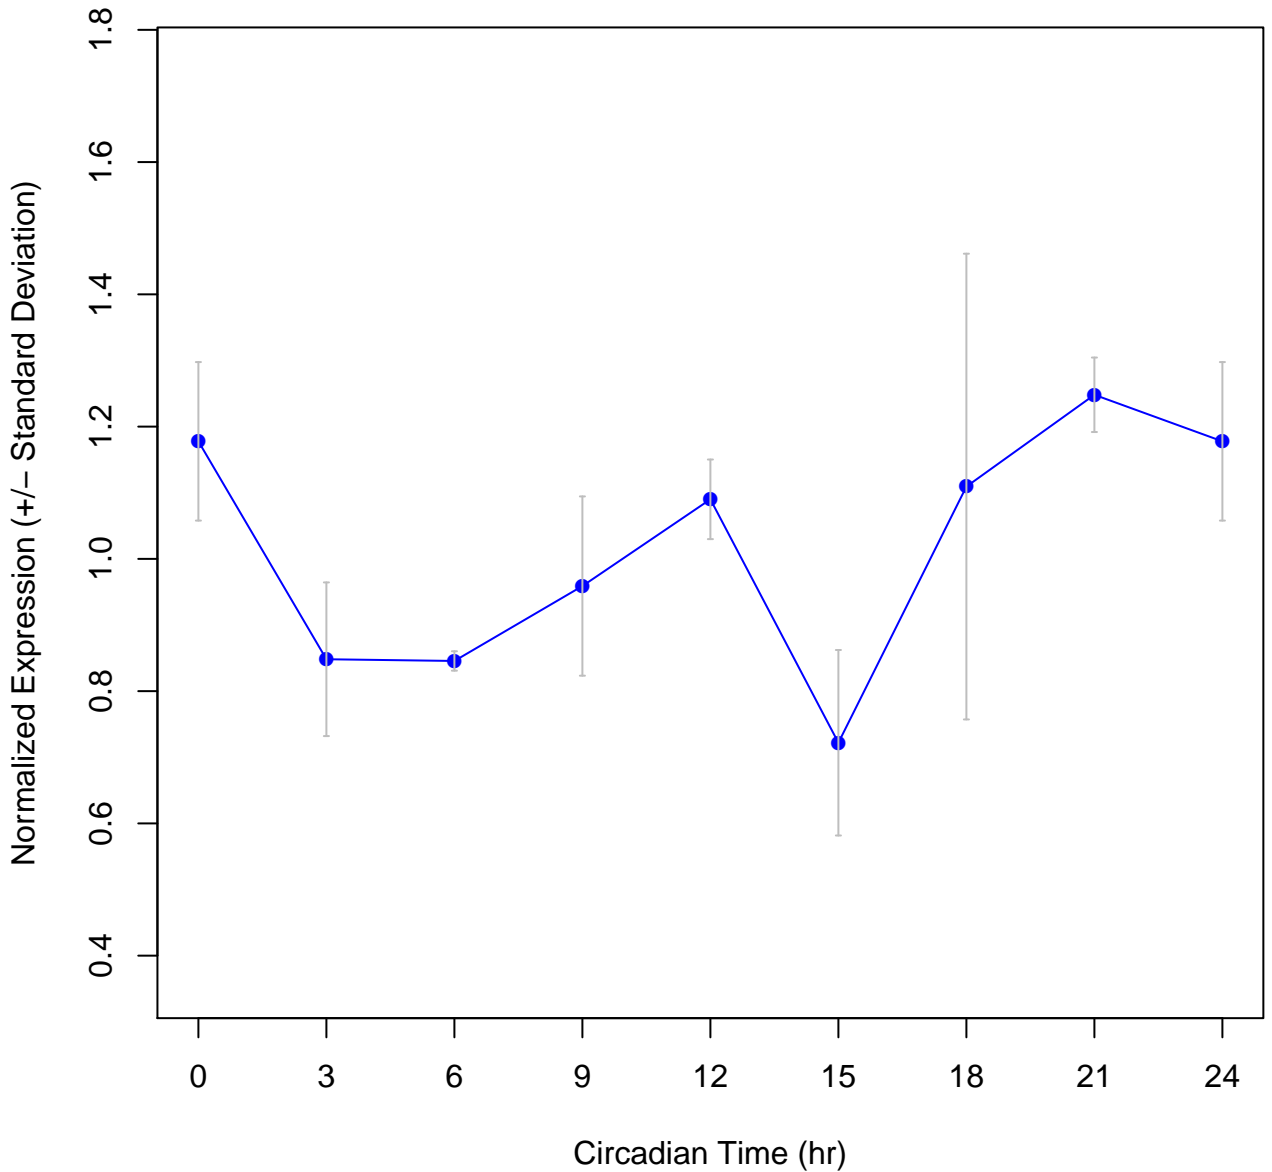

Supplement Figure 4 ccnf

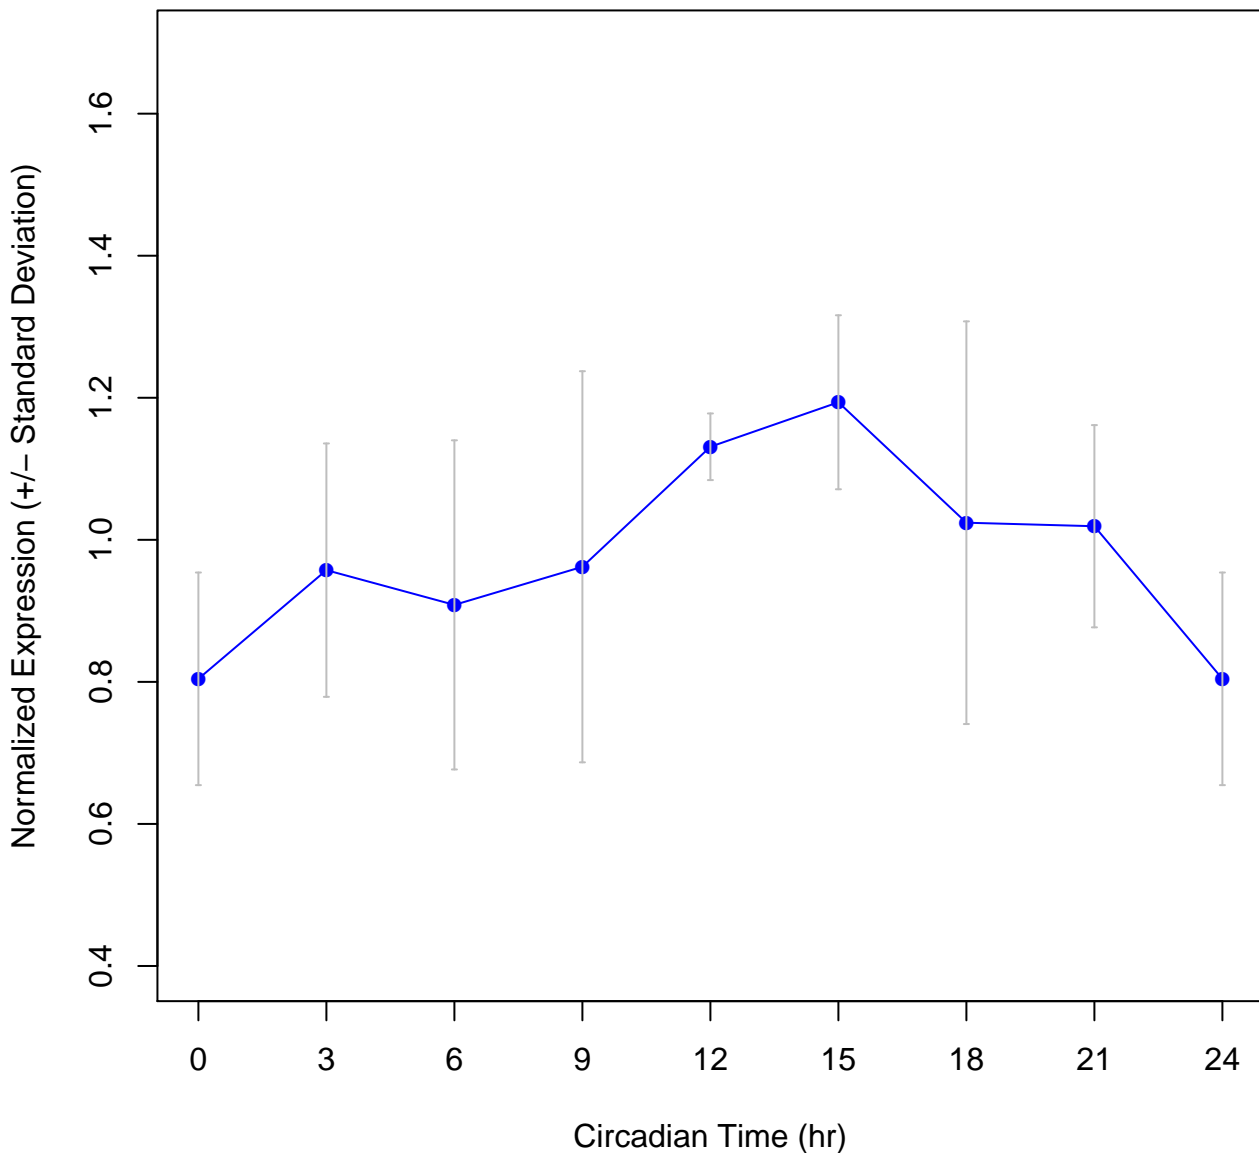



### Supplement Figure 4 cd44

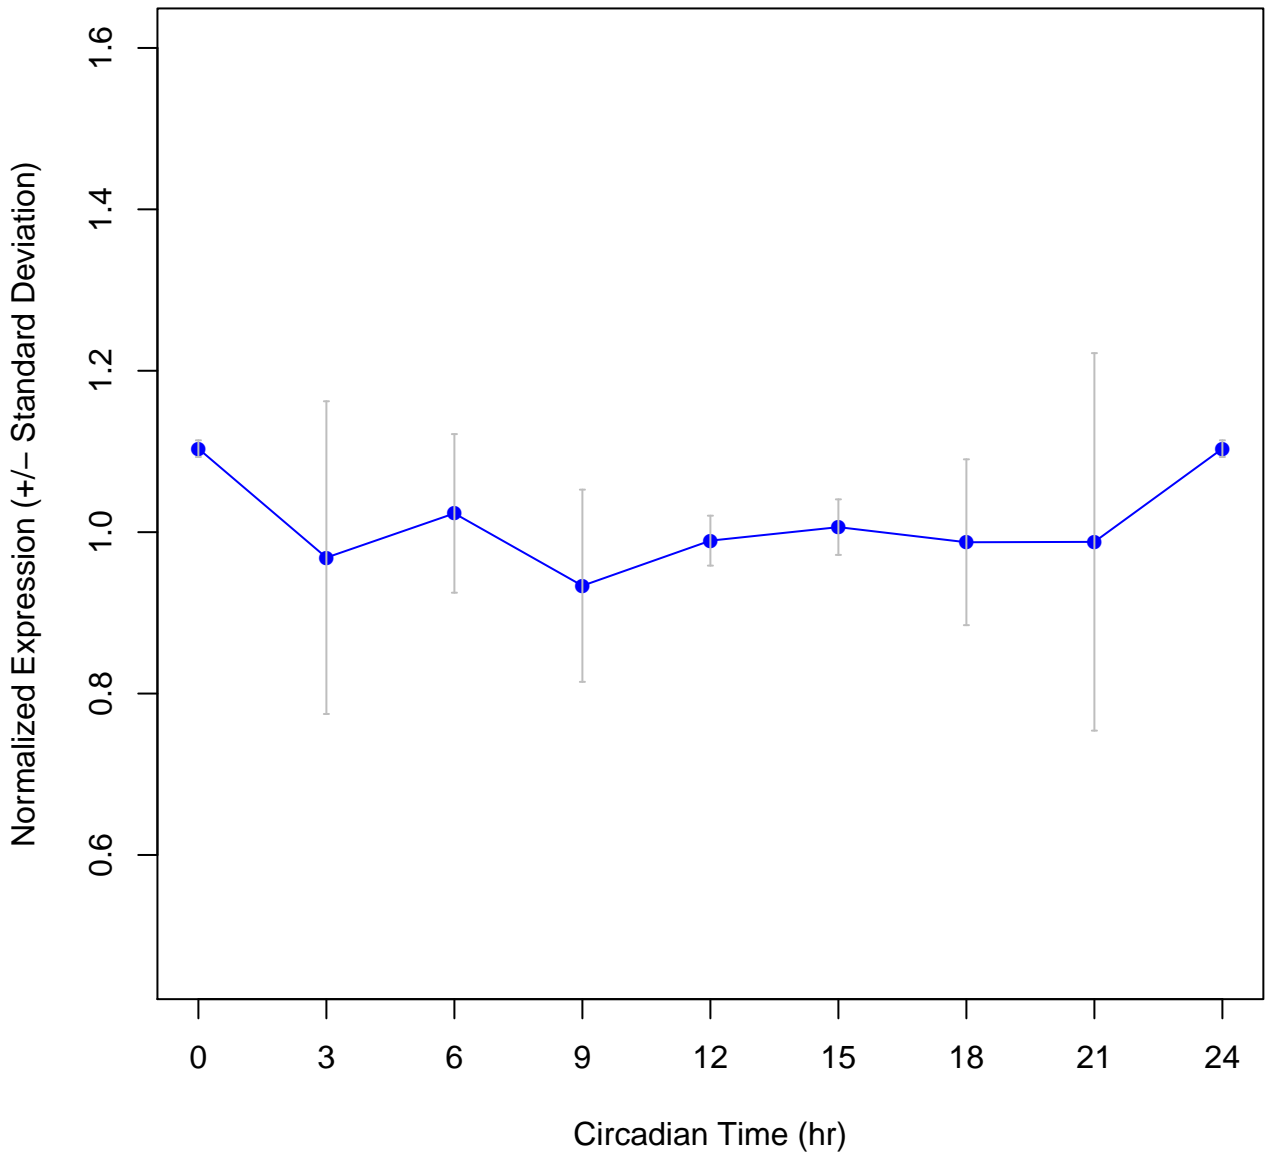

Supplement Figure 4 cdc20

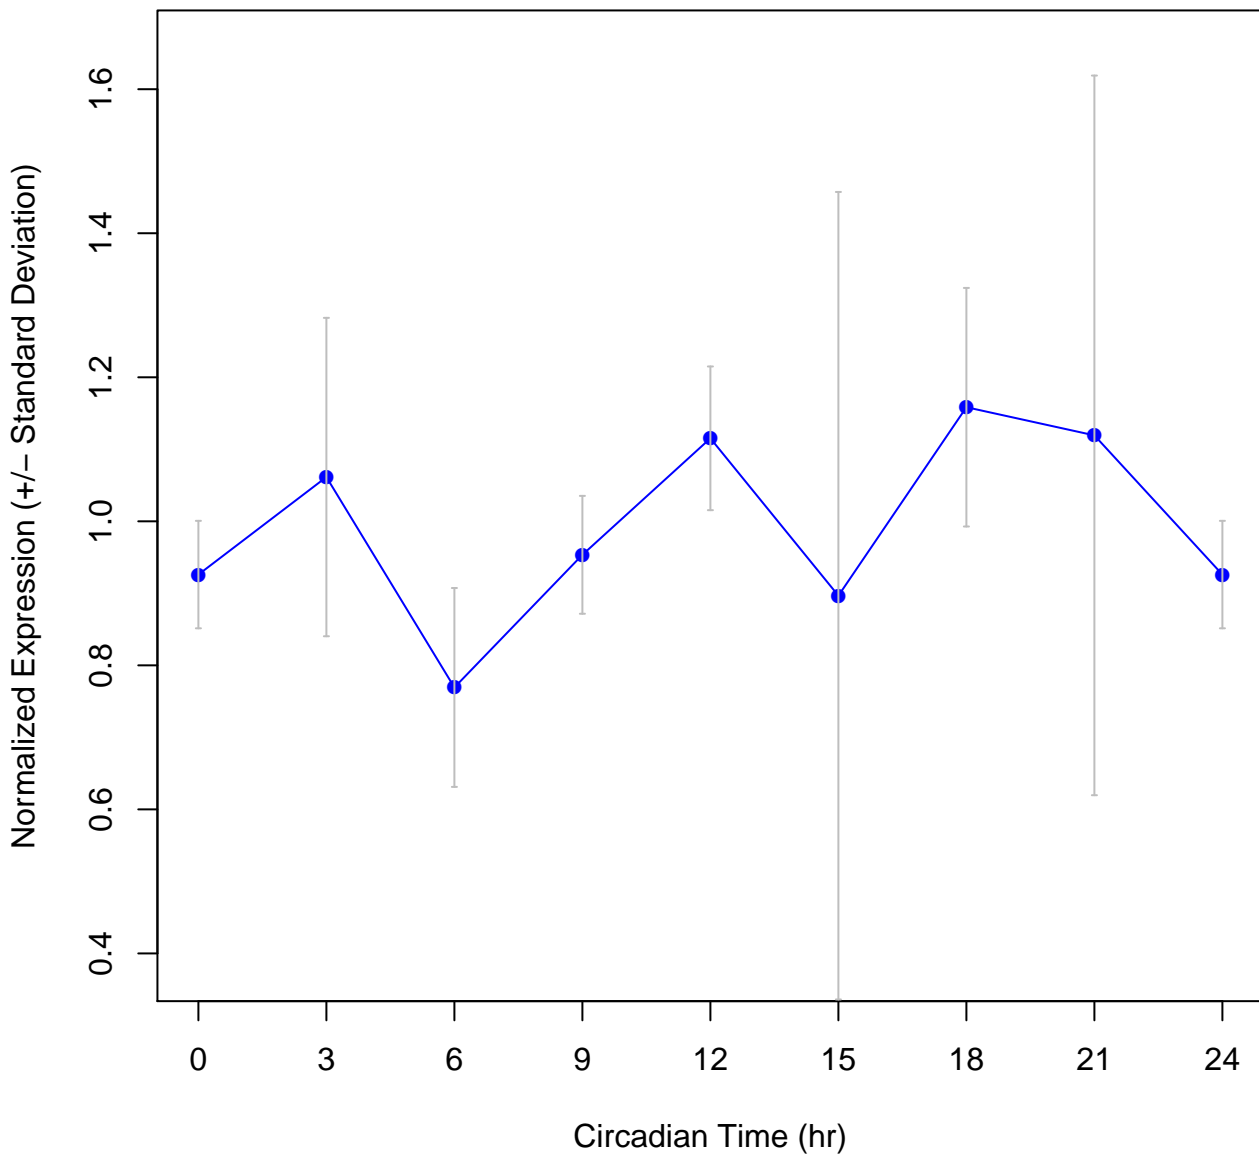

Supplement Figure 4 *cdc25b*

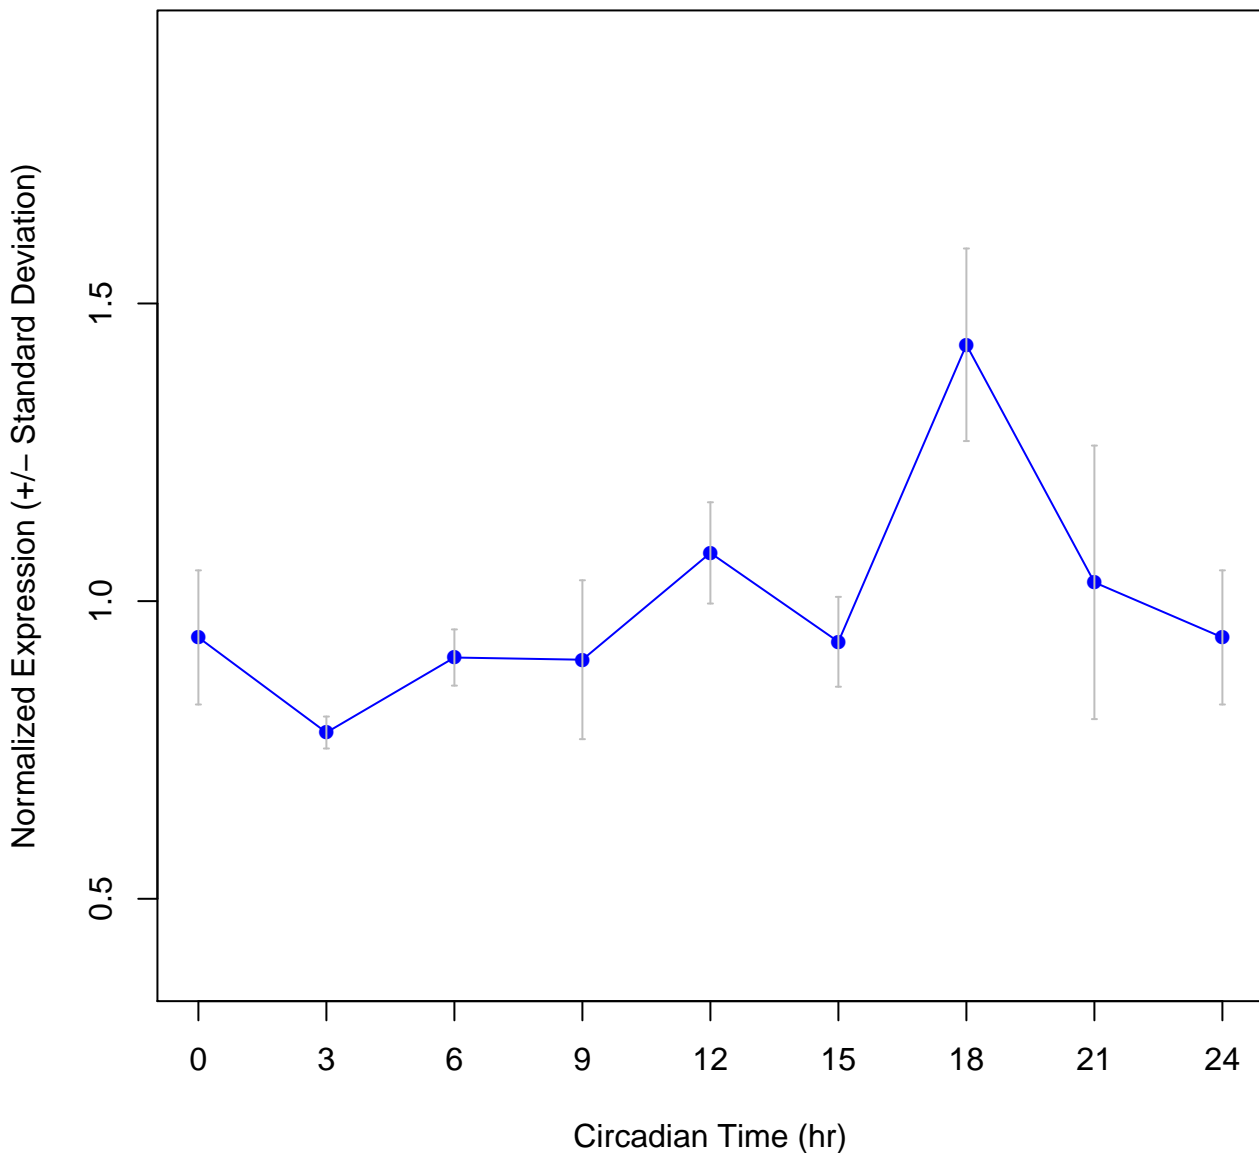

**Supplement Figure 4 cdca7**

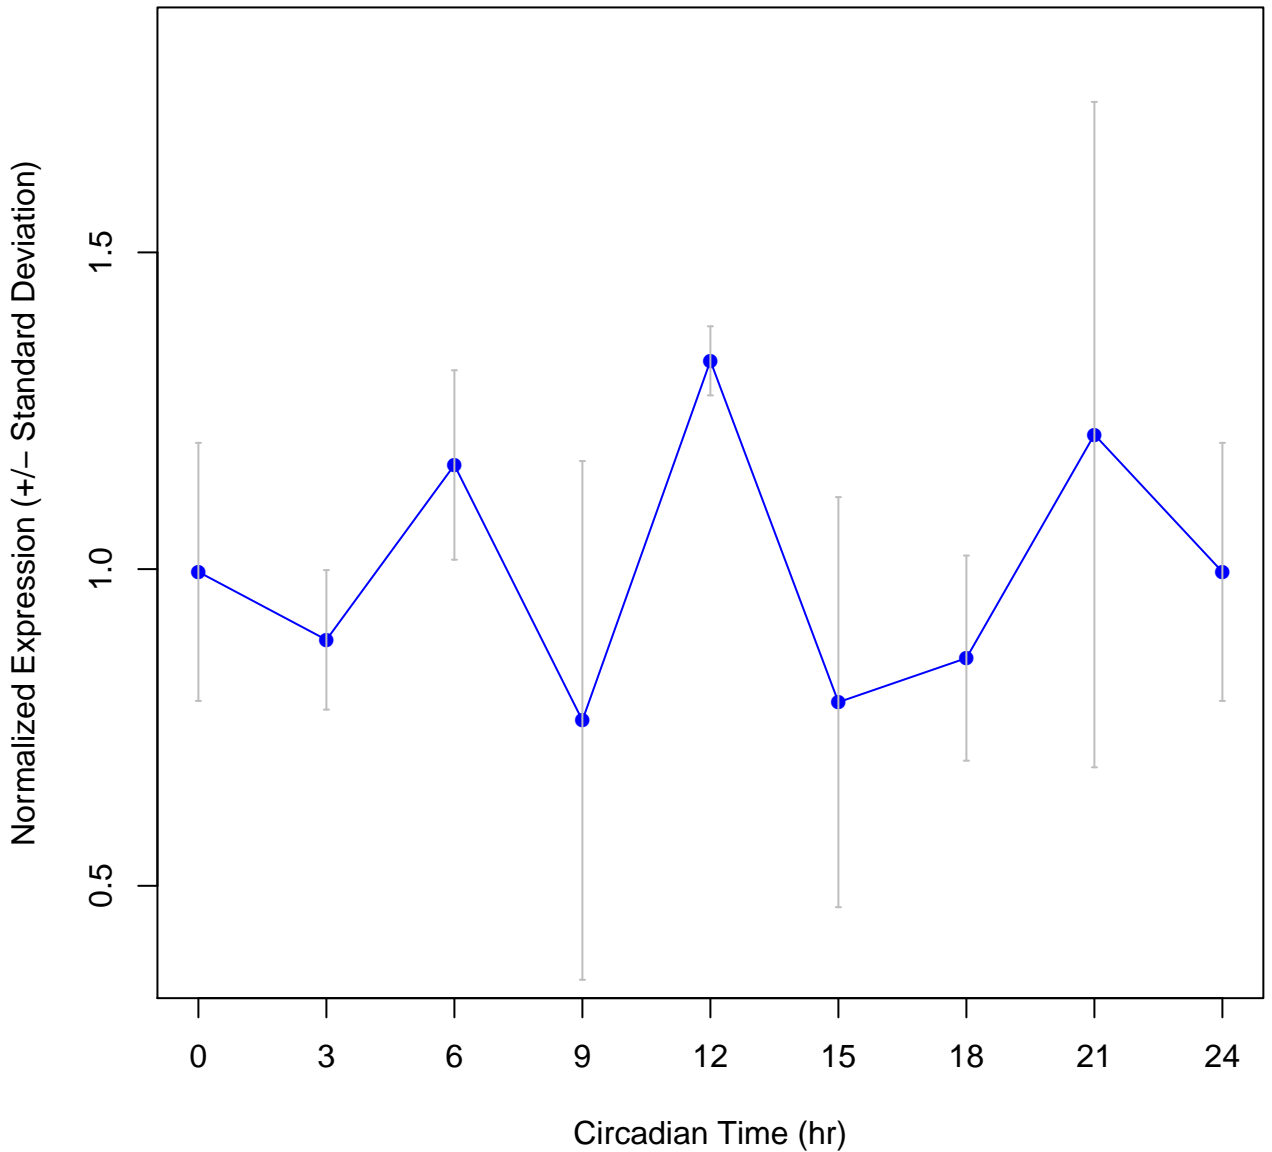

**Supplement Figure 4 cdh15**

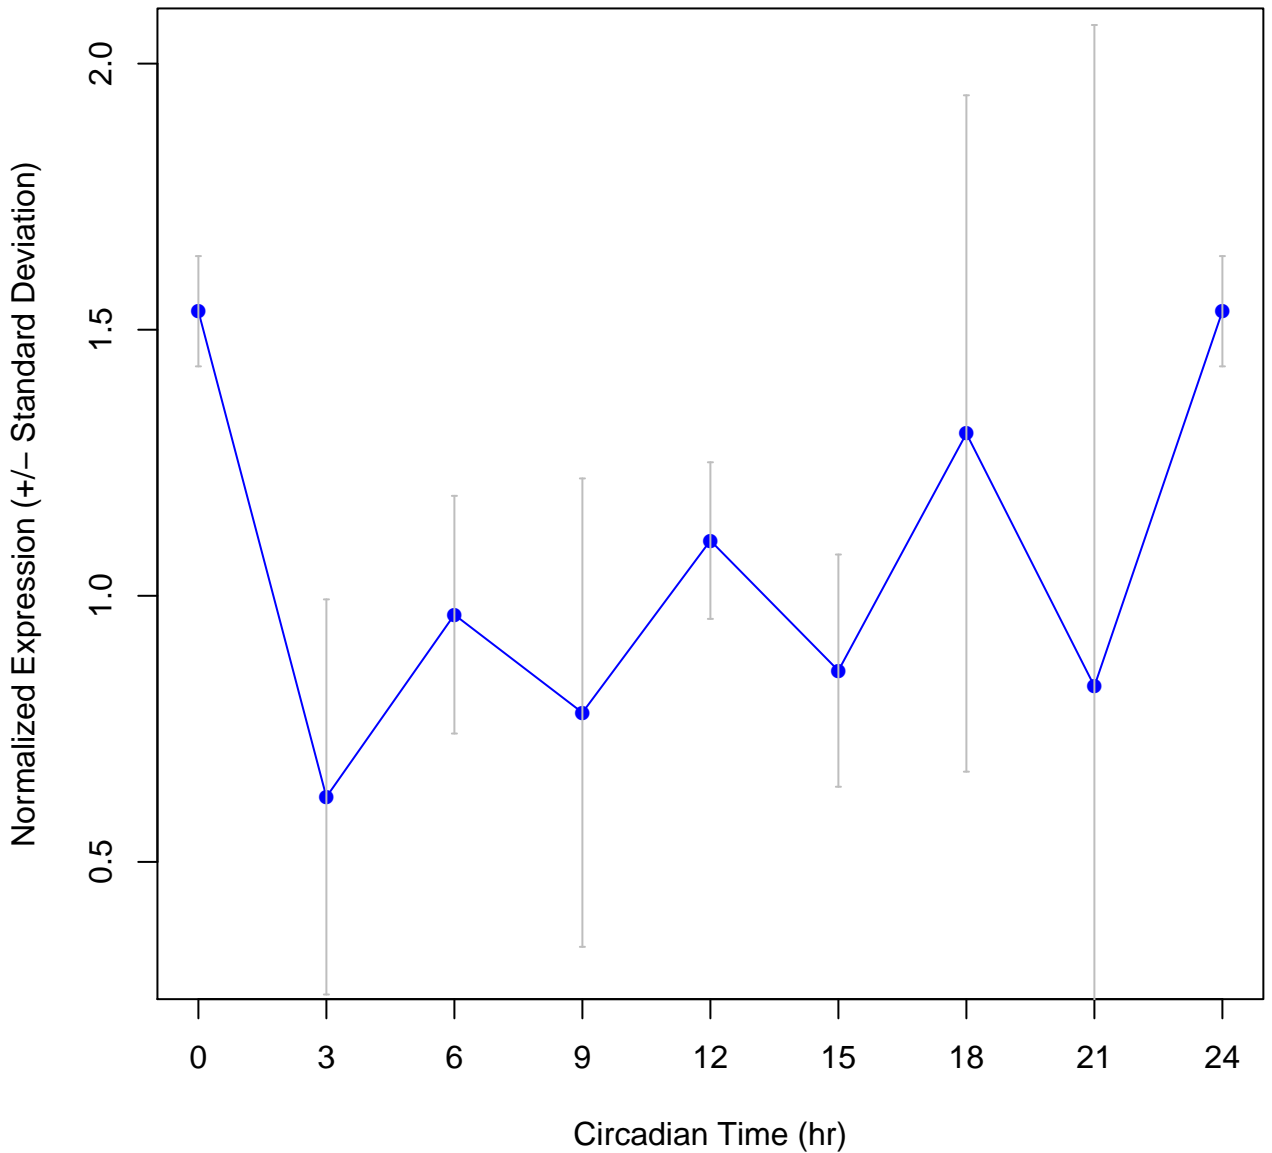

### Supplement Figure 4 cdk1

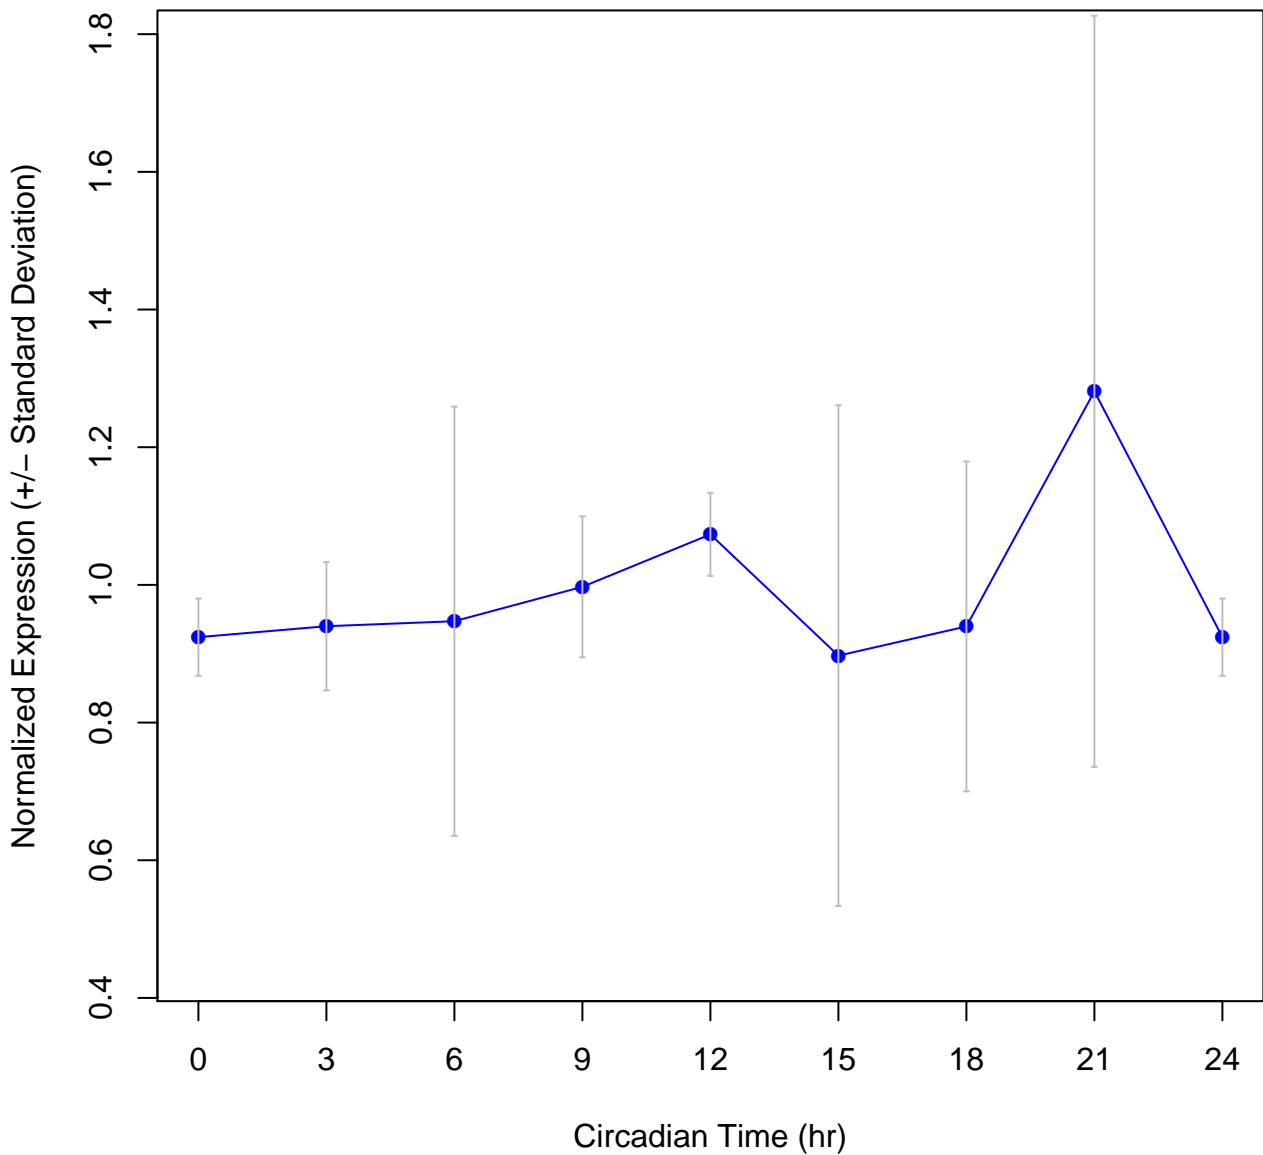

## Supplement Figure 4 cdk7

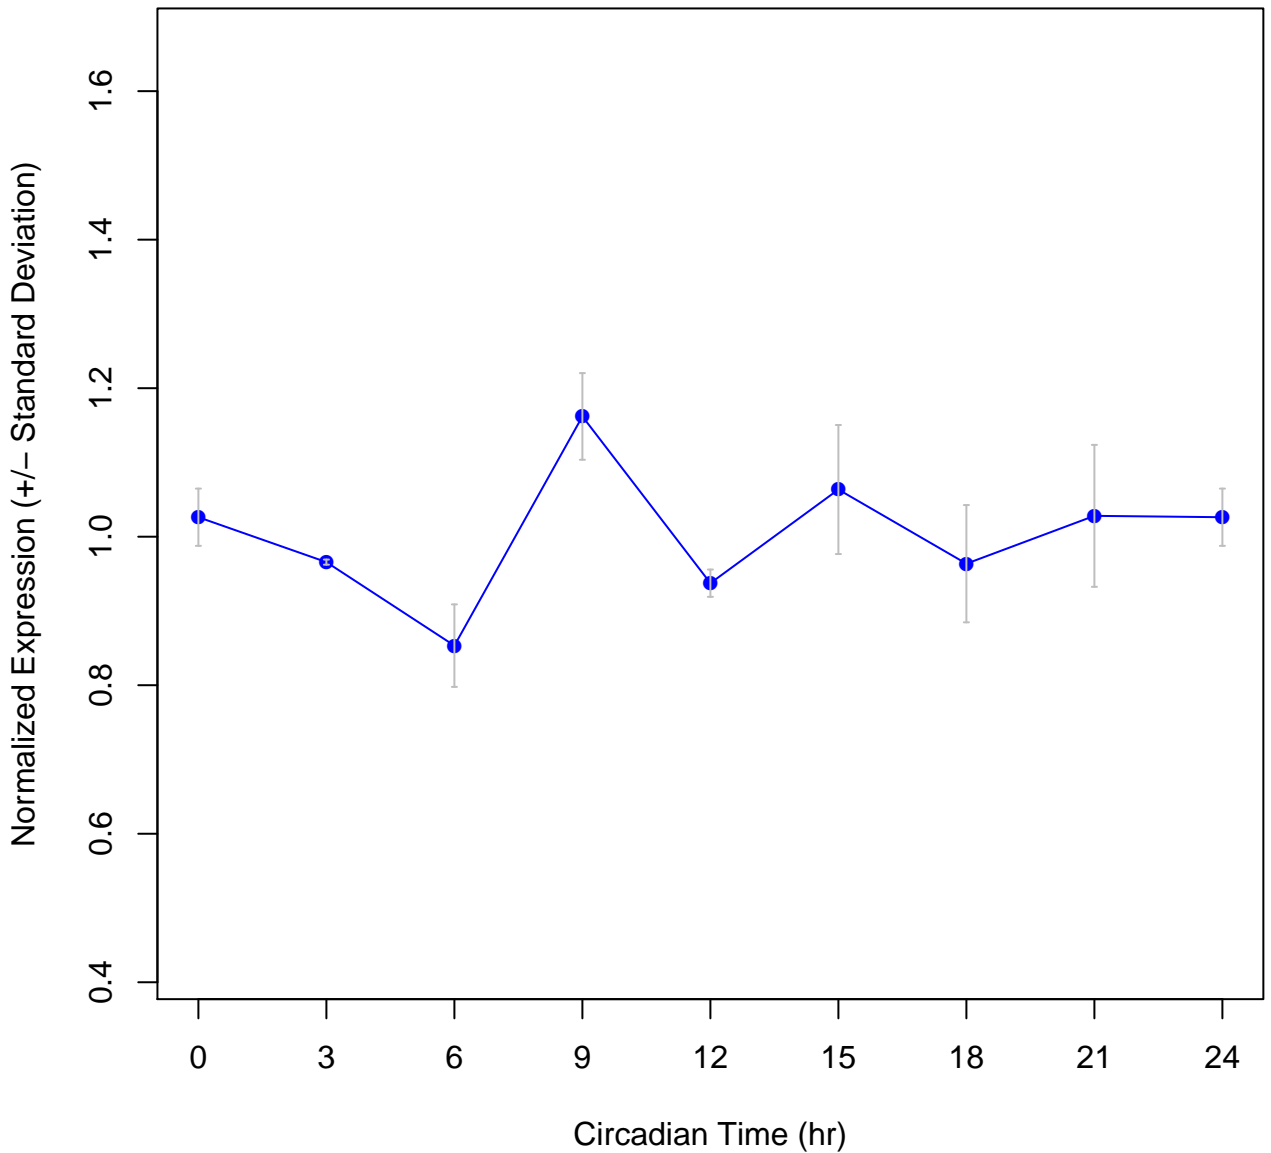

Supplement Figure 4 cdkn1a

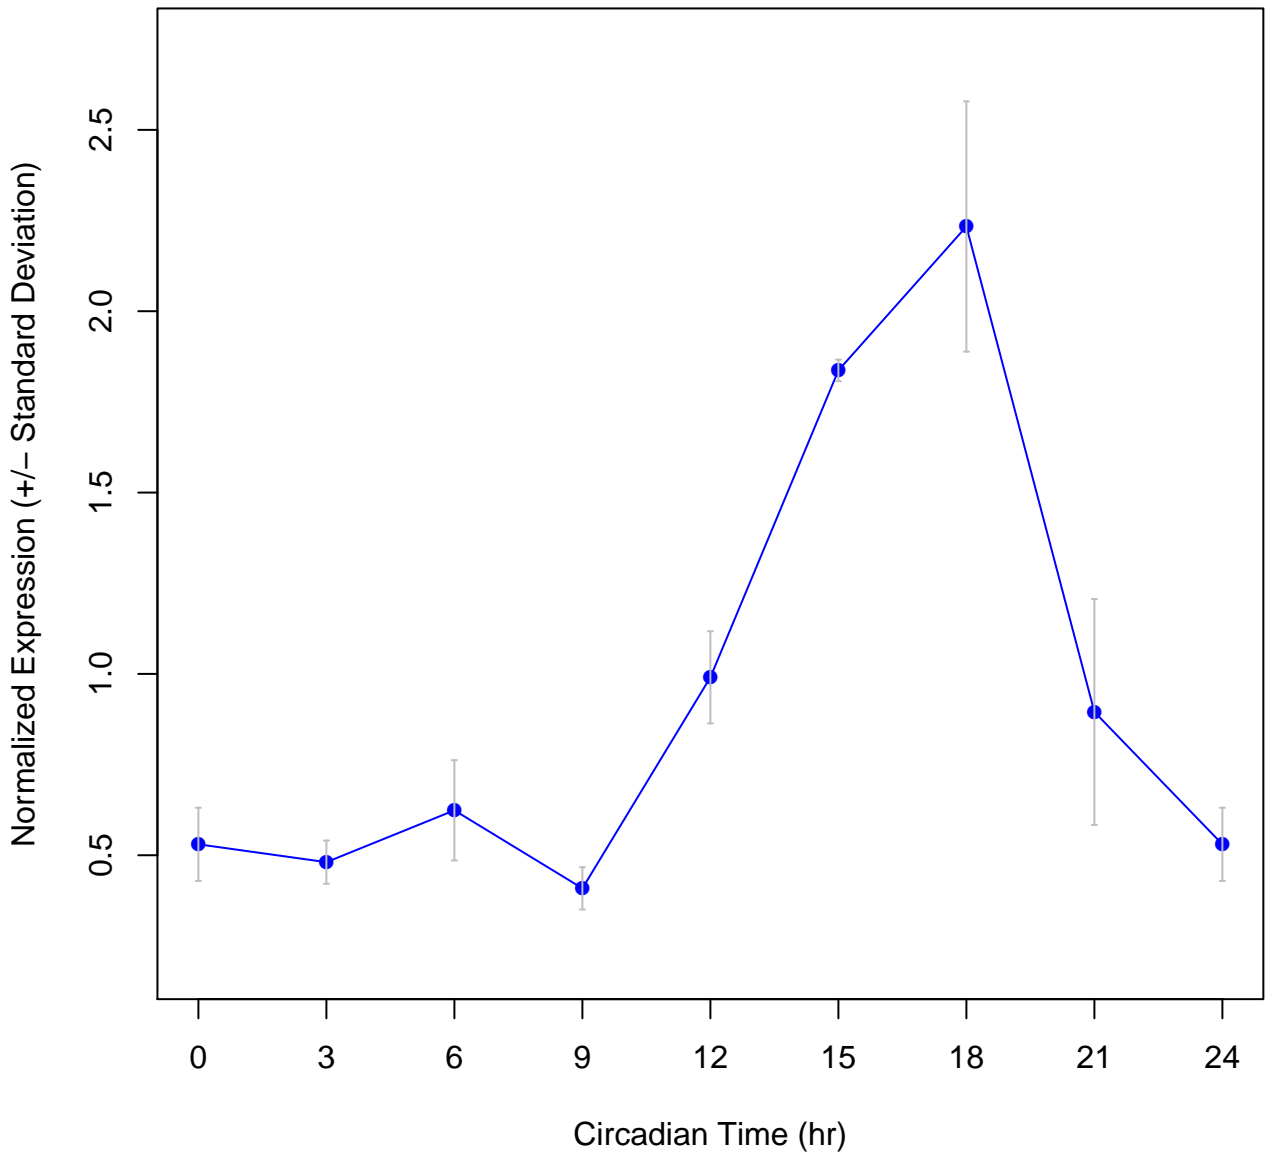



## Supplement Figure 4 chk1

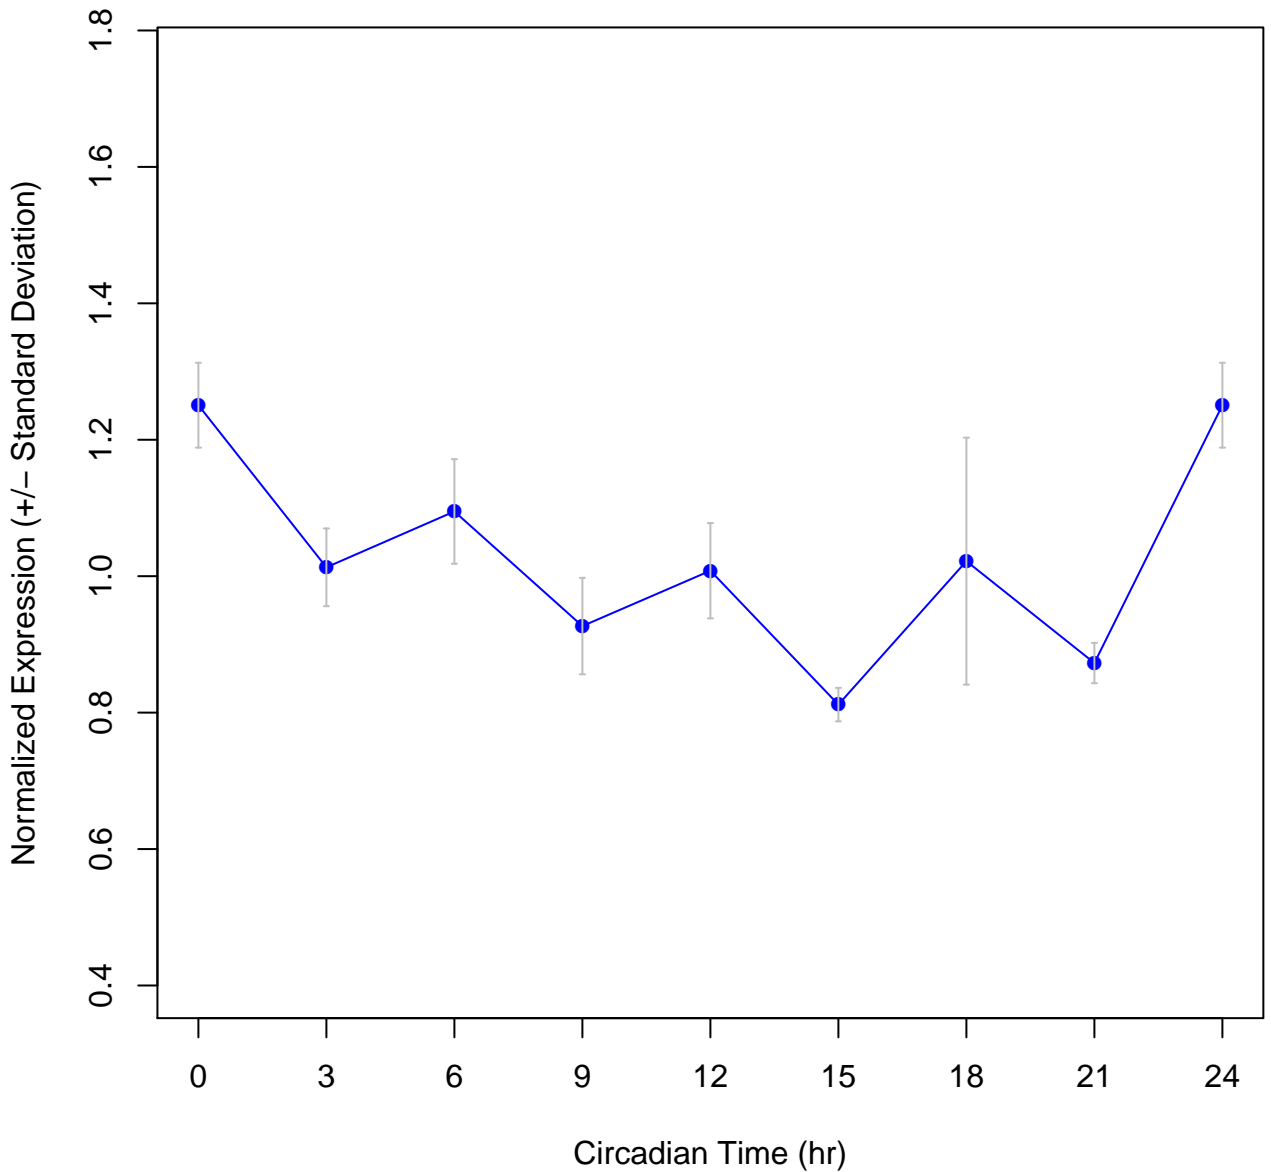

Supplement Figure 4 chrnb1

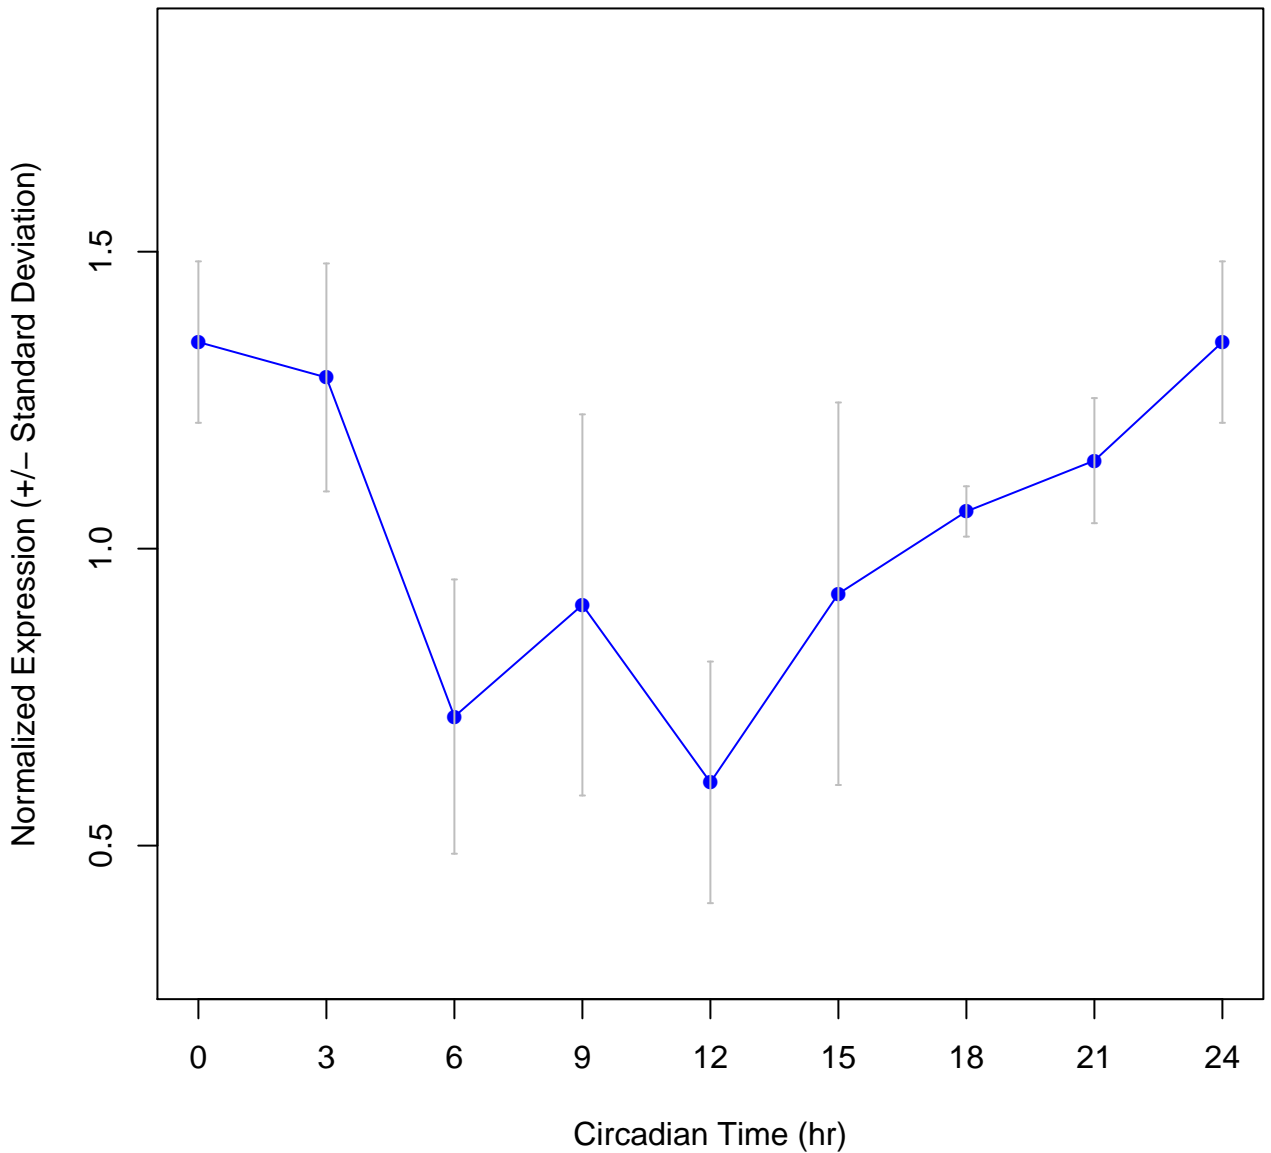

Supplement Figure 4 ck1e

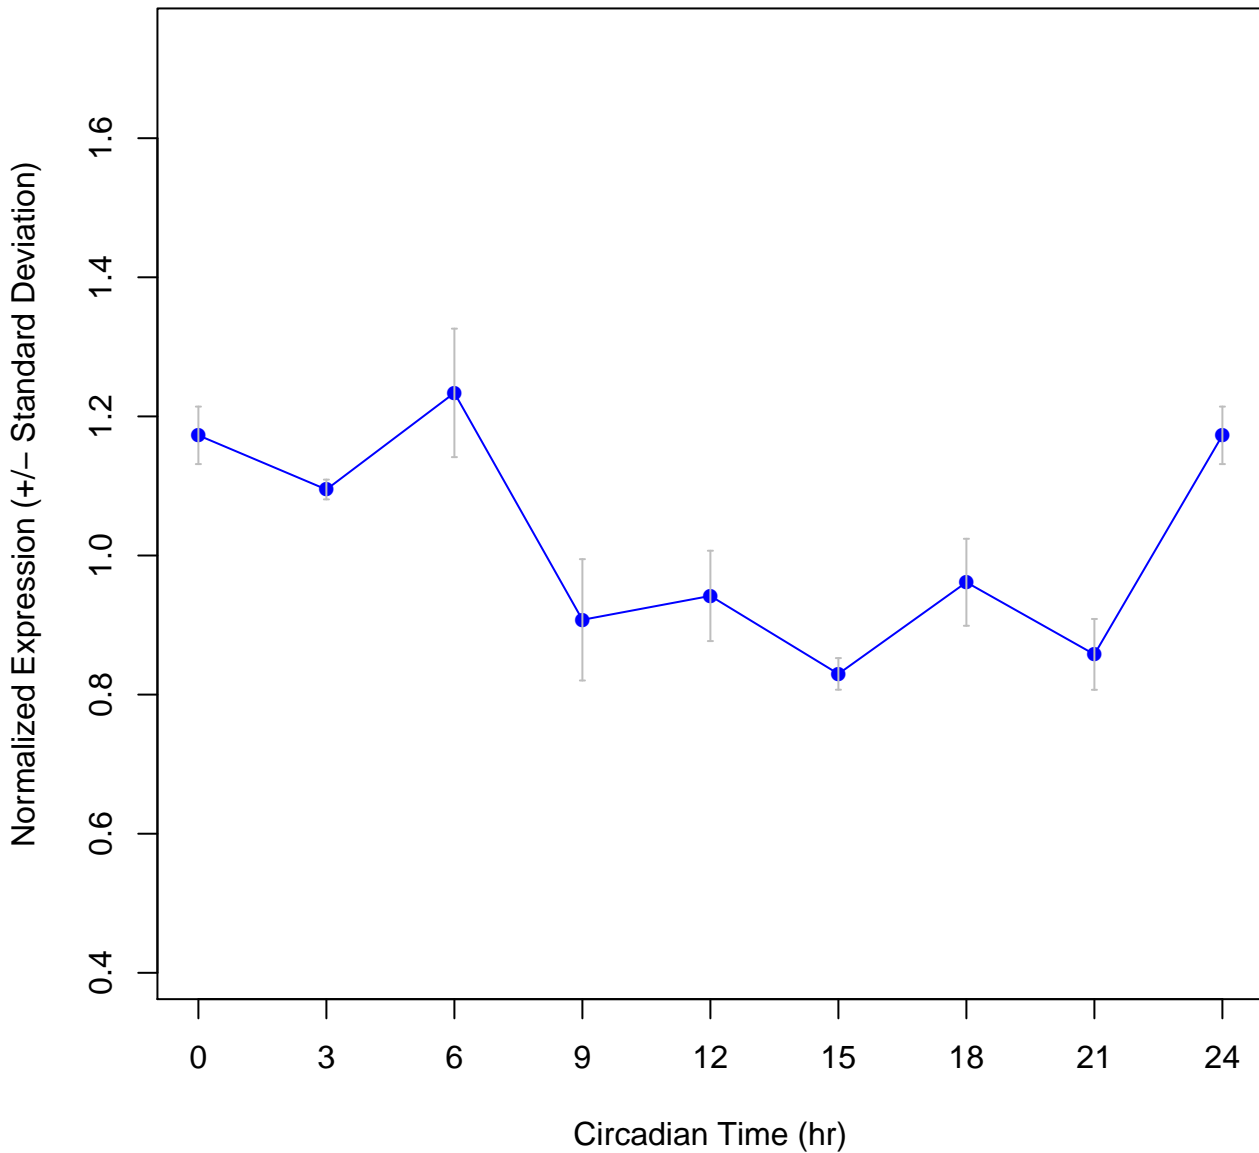

**Supplement Figure 4 ckm**

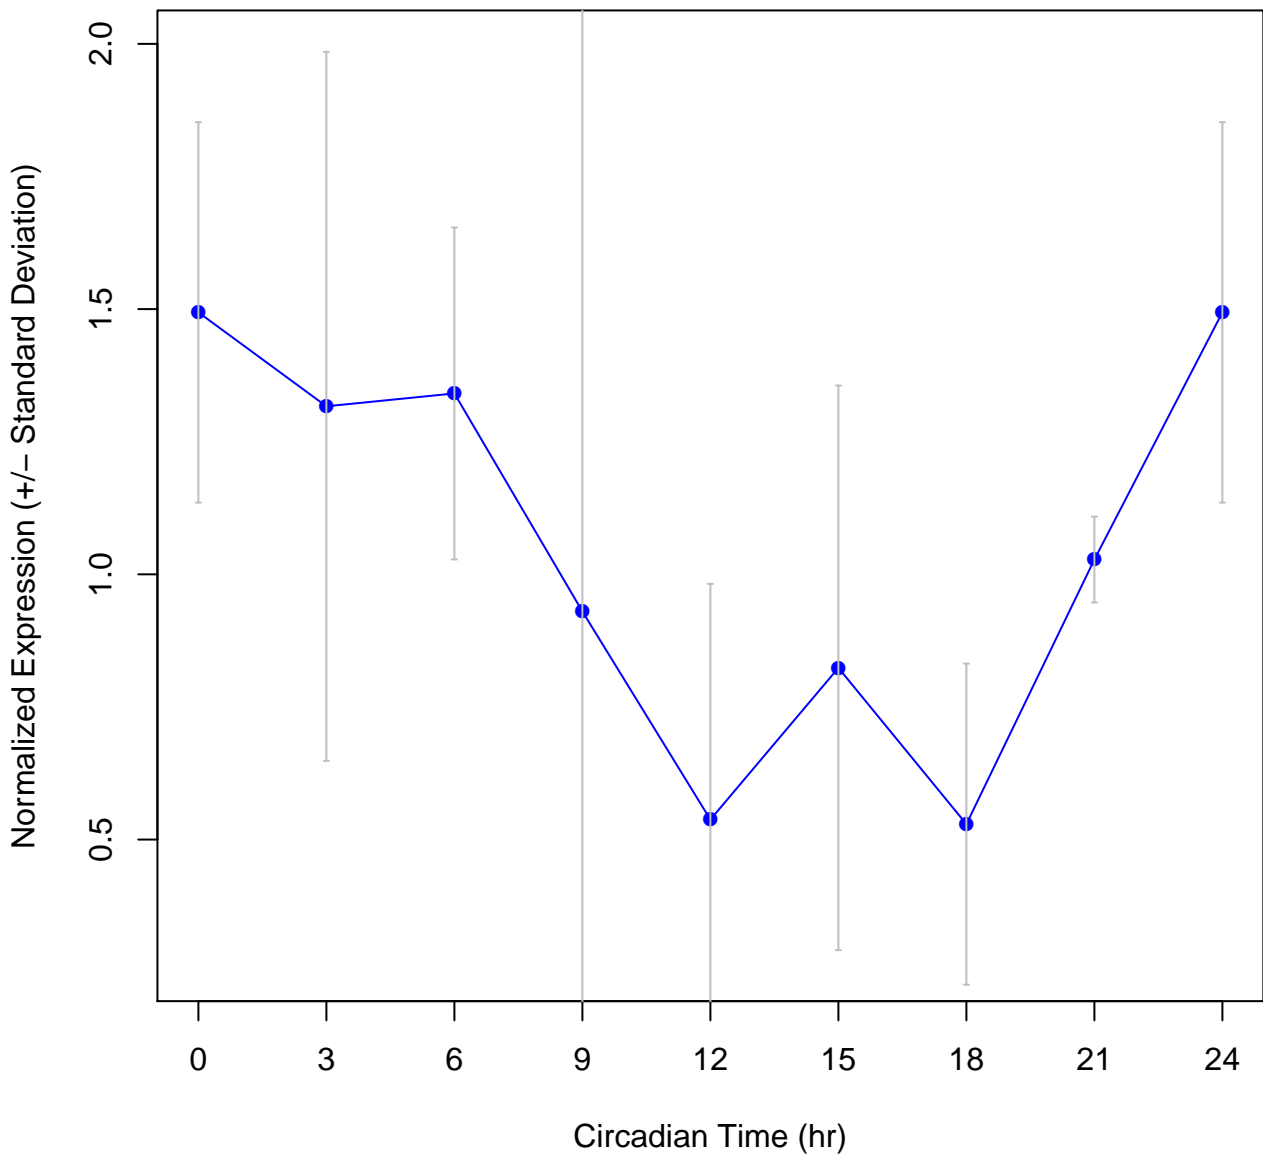

Supplement Figure 4 cks2

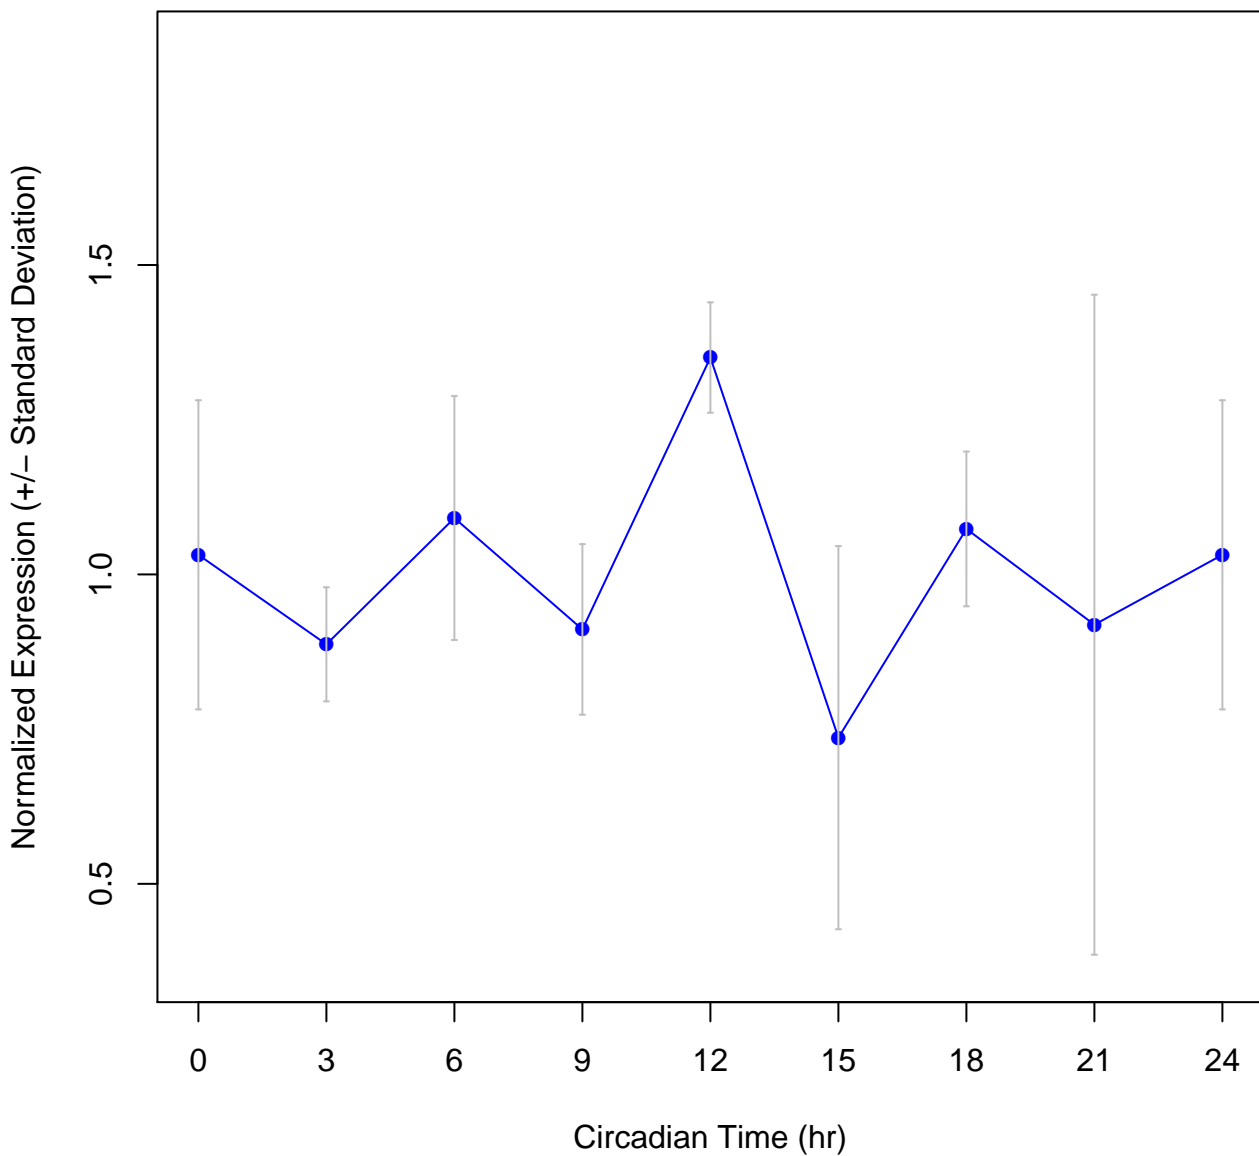

## Supplement Figure 4 clocka

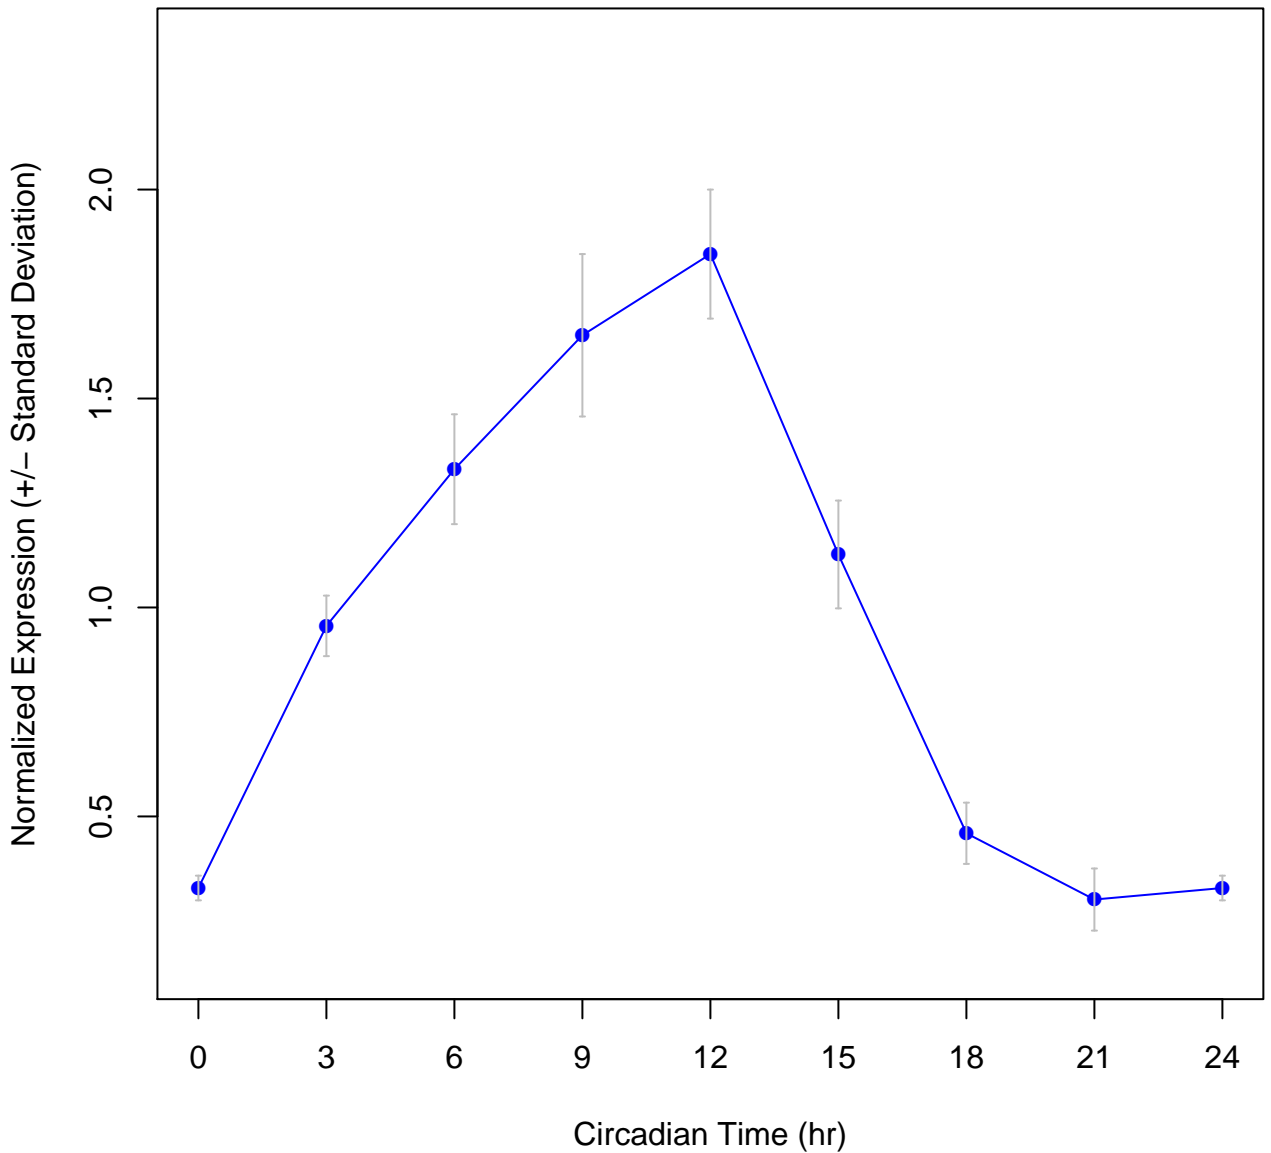

**Supplement Figure 4 clockb**

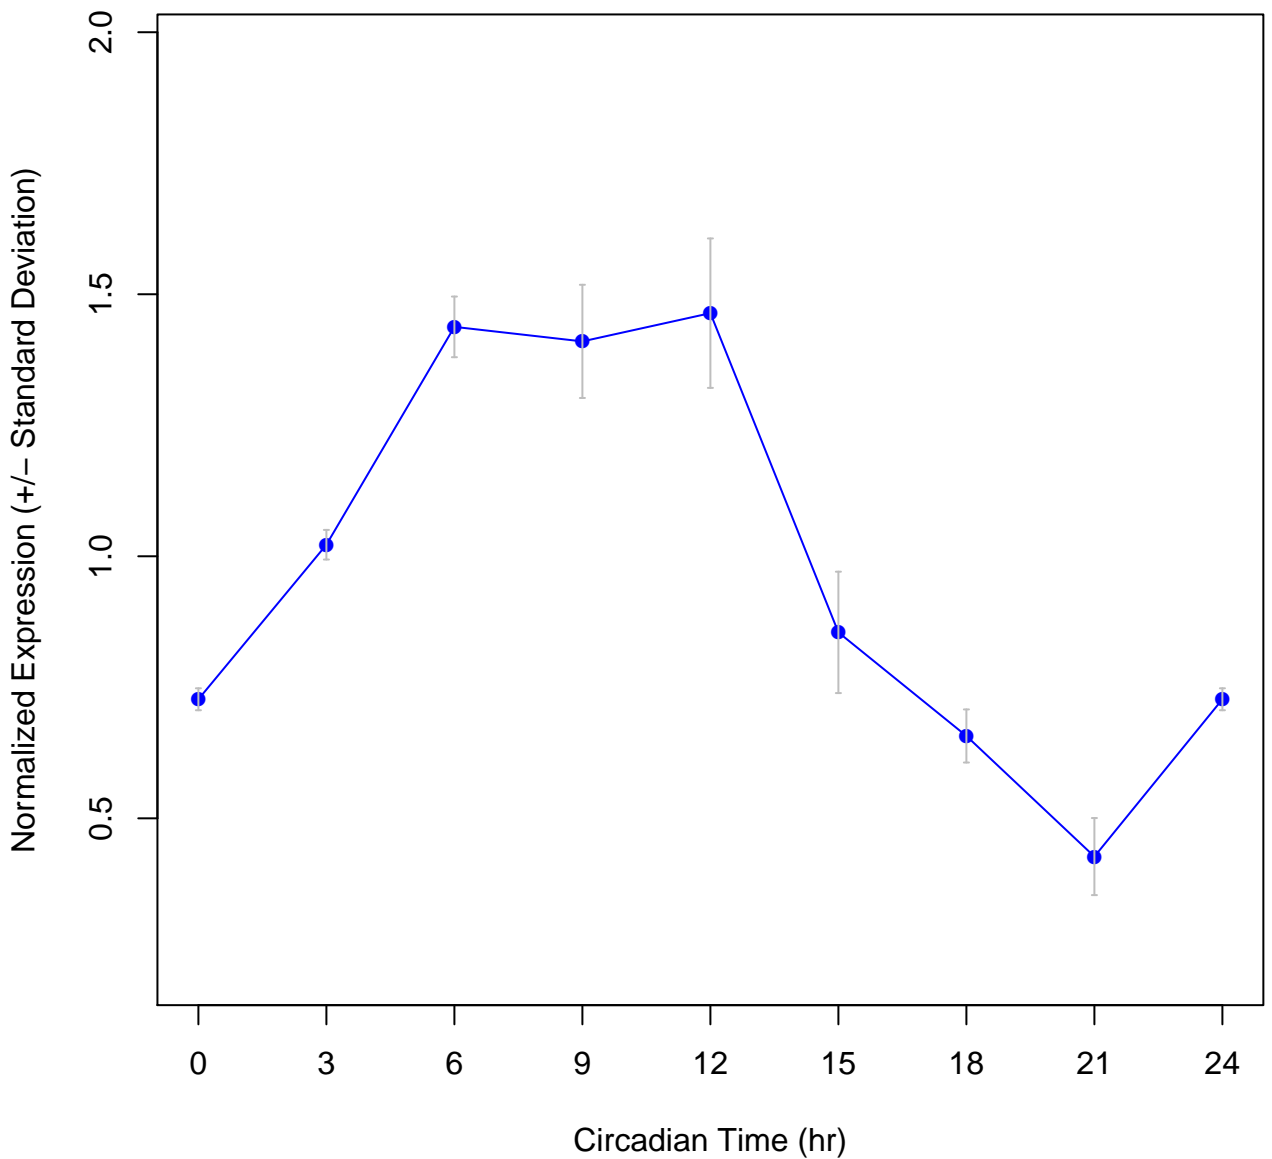

Supplement Figure 4 col9a1

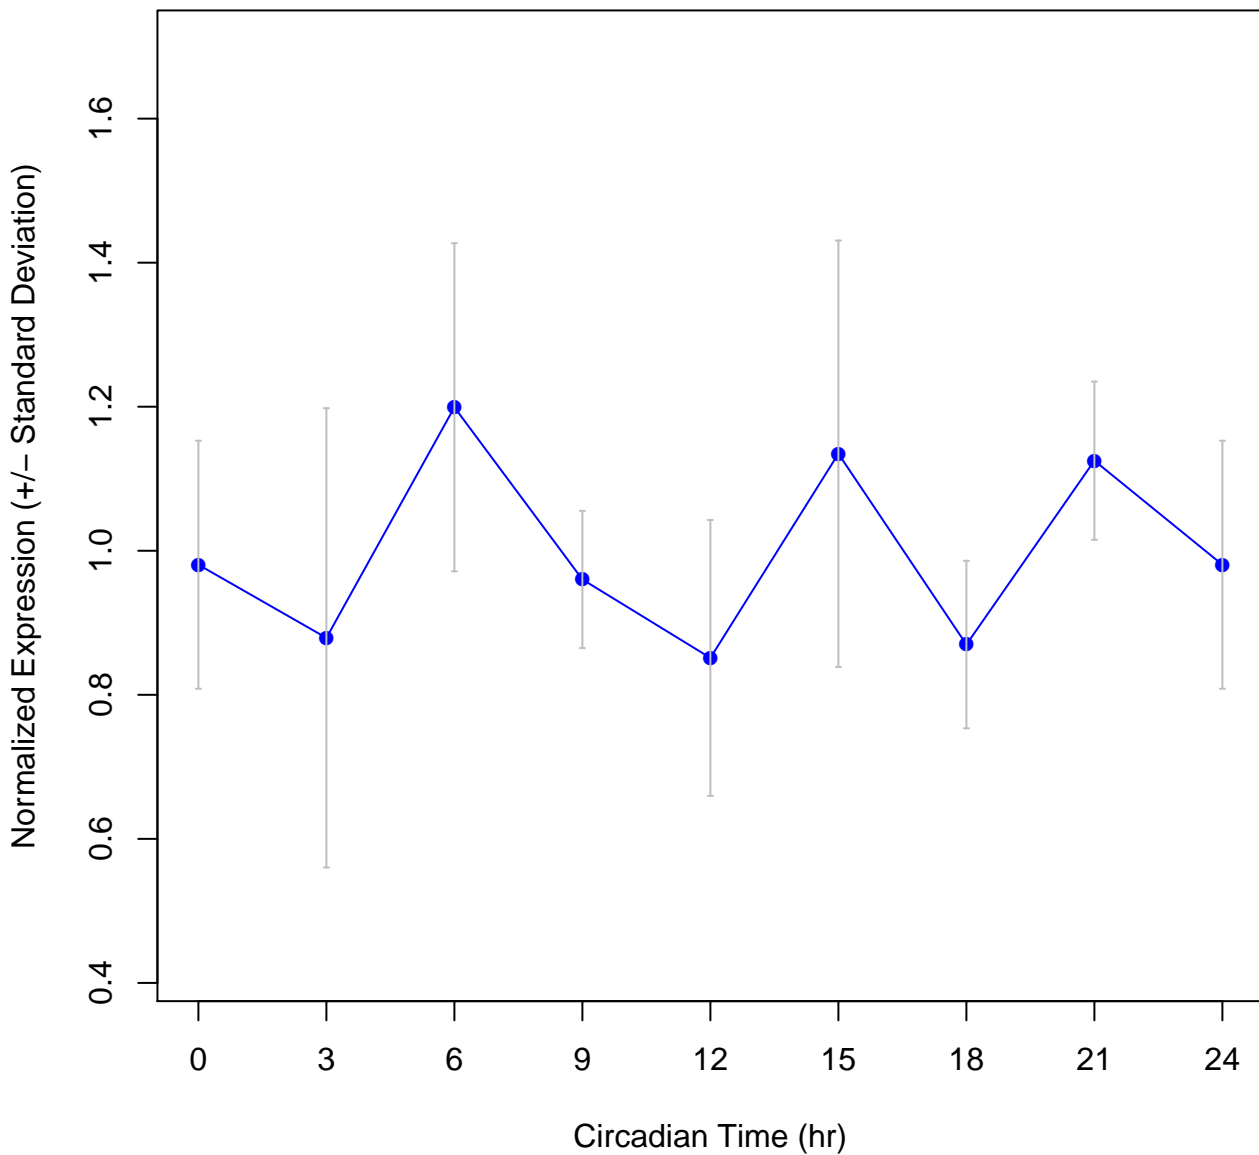



Supplement Figure 4 cpd photolyase

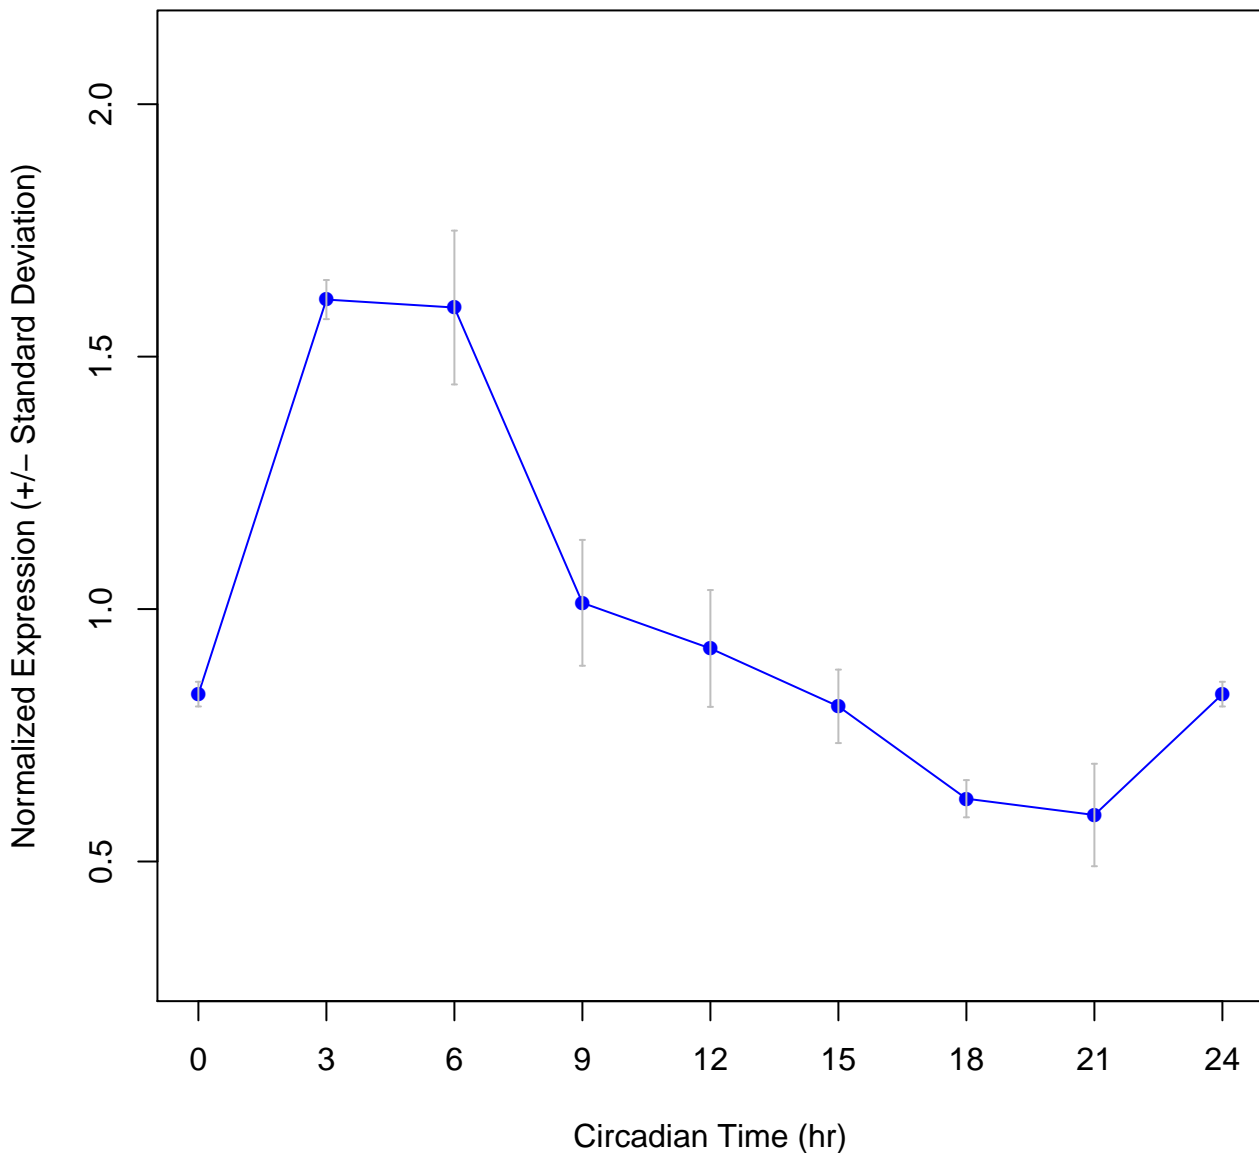

Supplement Figure 4 creb5

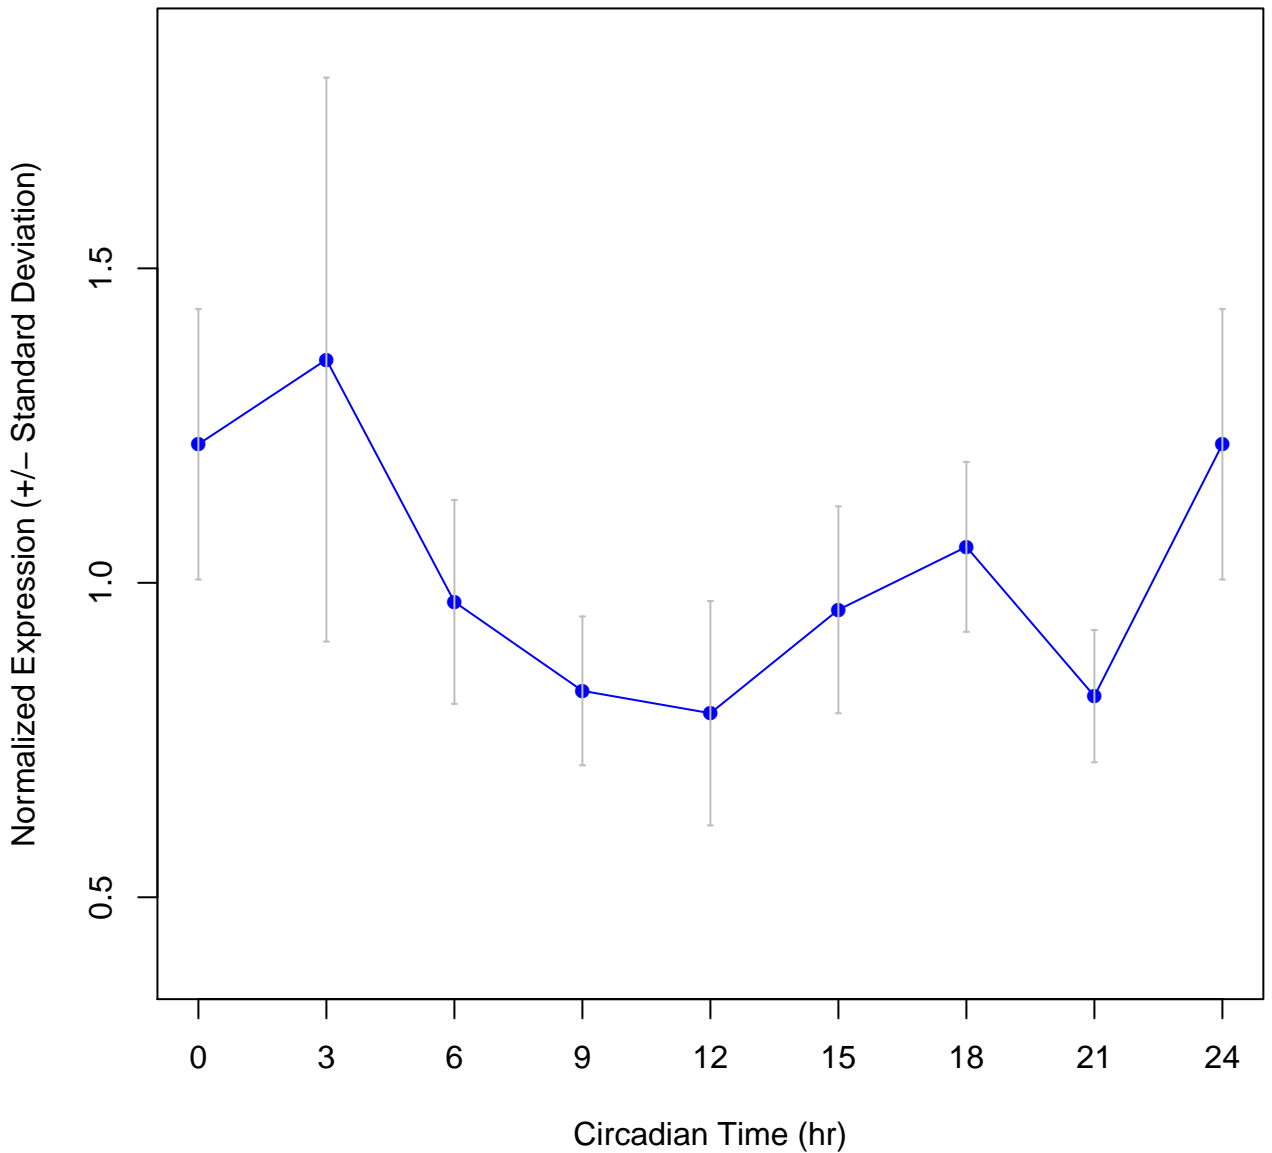

Supplement Figure 4 crtc2

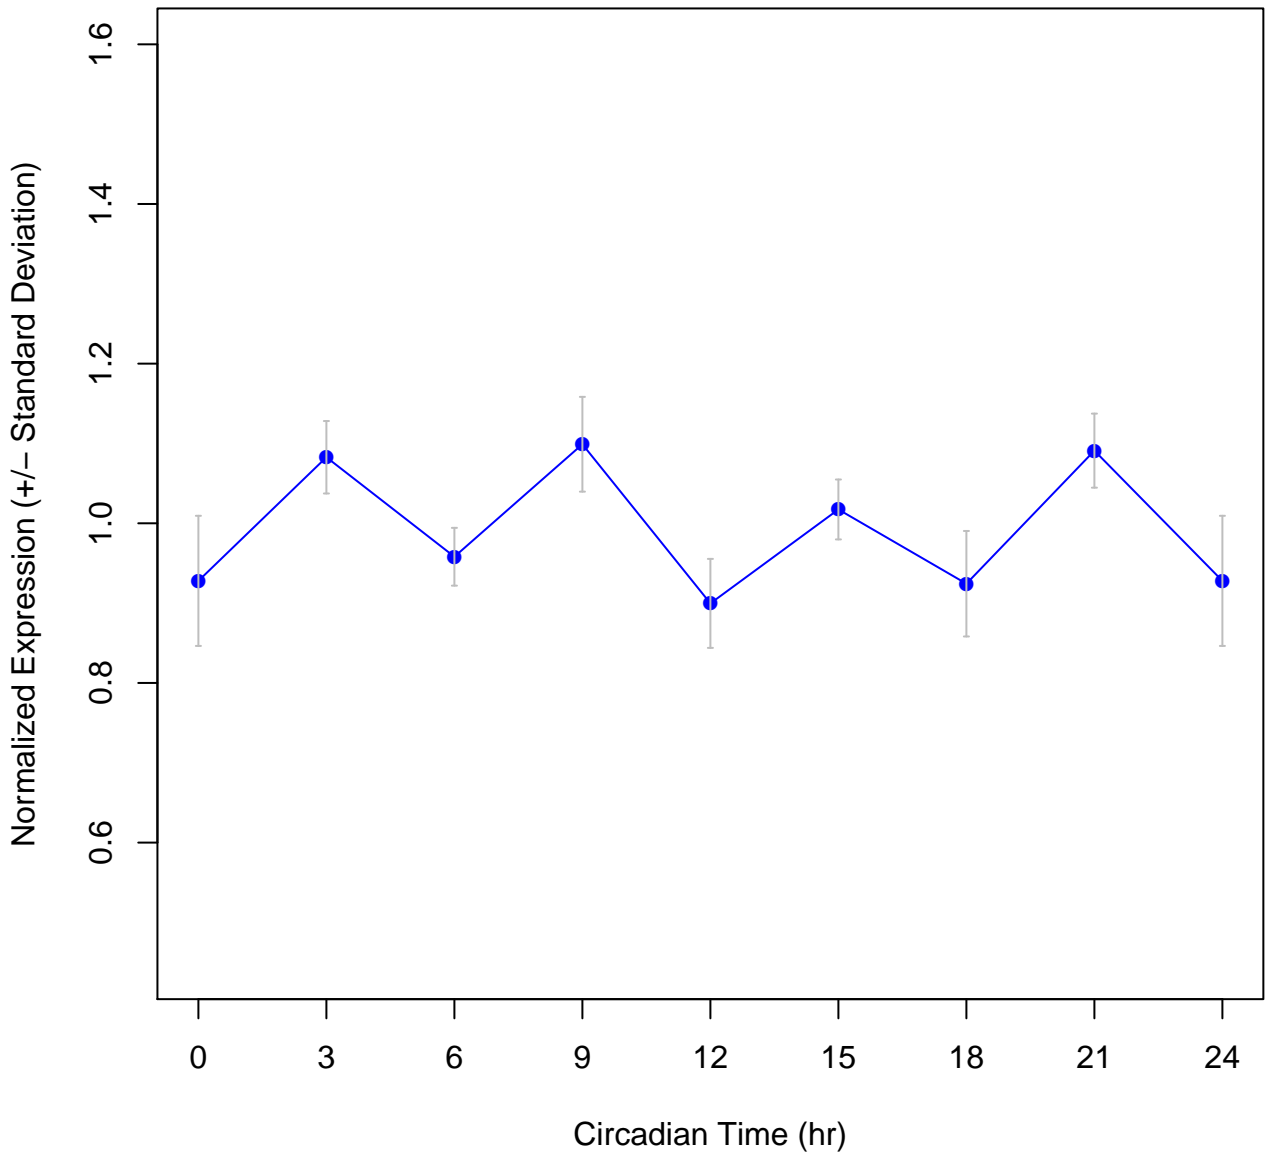

Supplement Figure 4 cry1

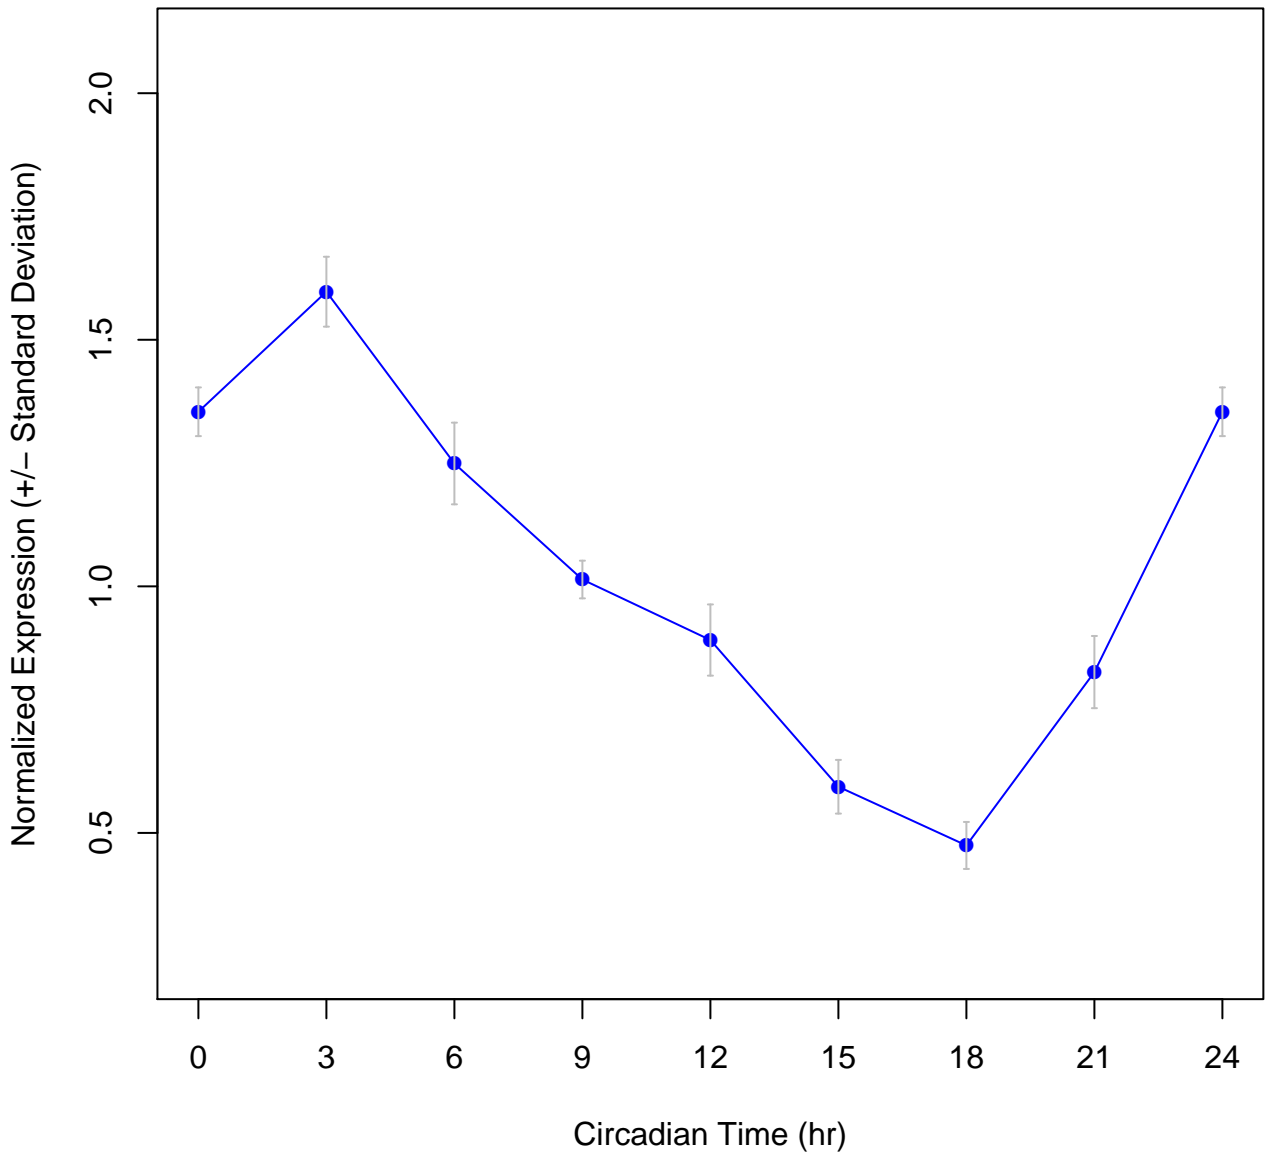

Supplement Figure 4 cry2

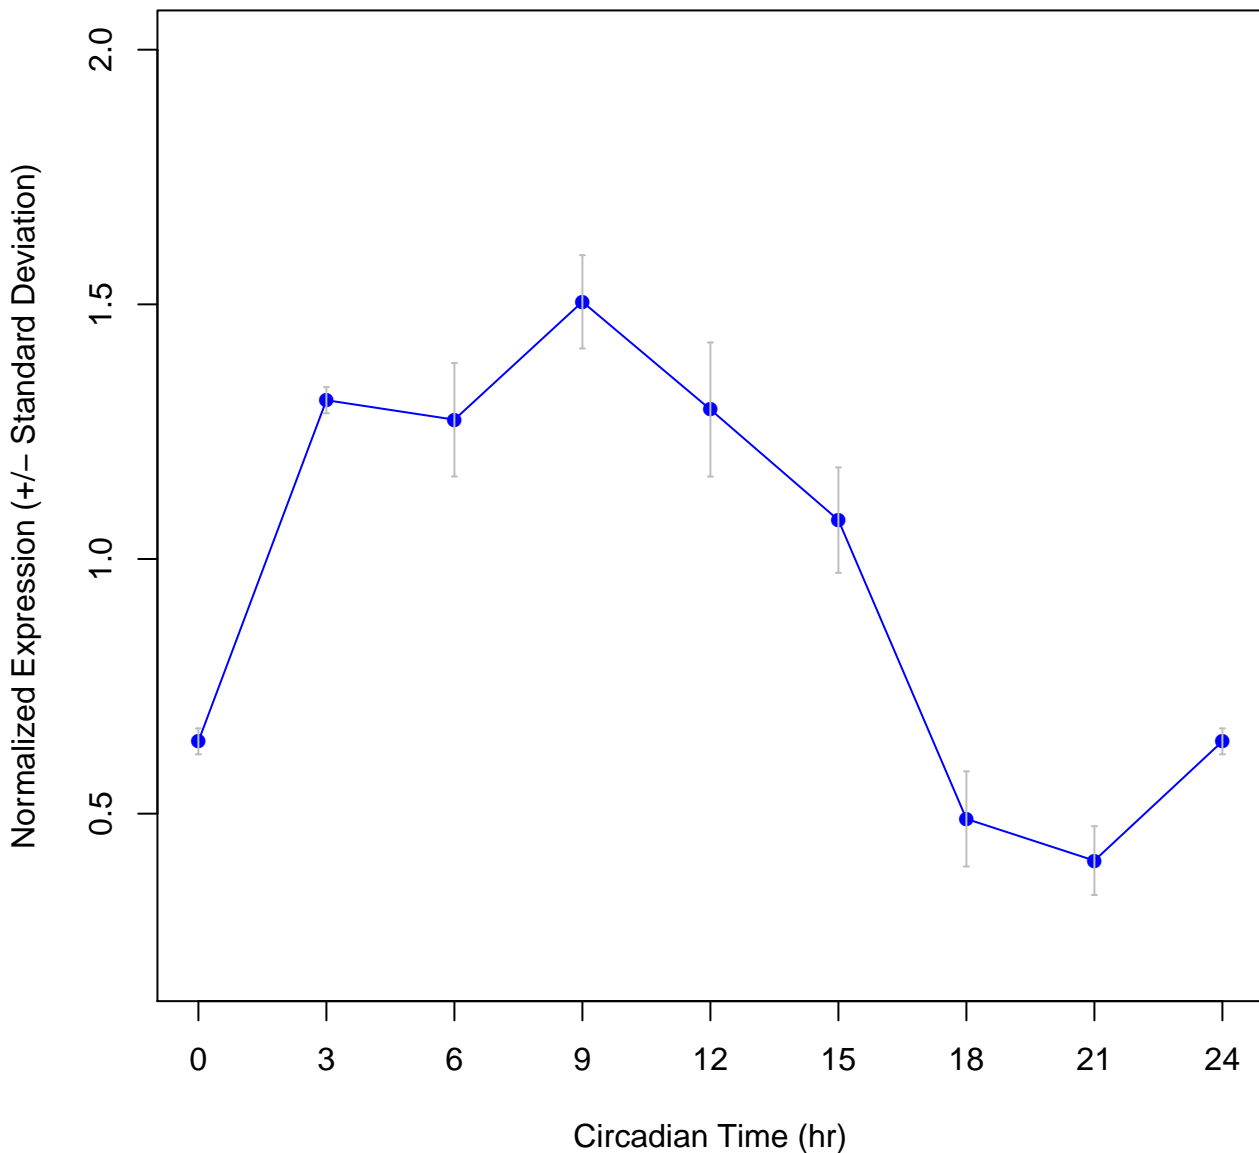

Supplement Figure 4 cry3

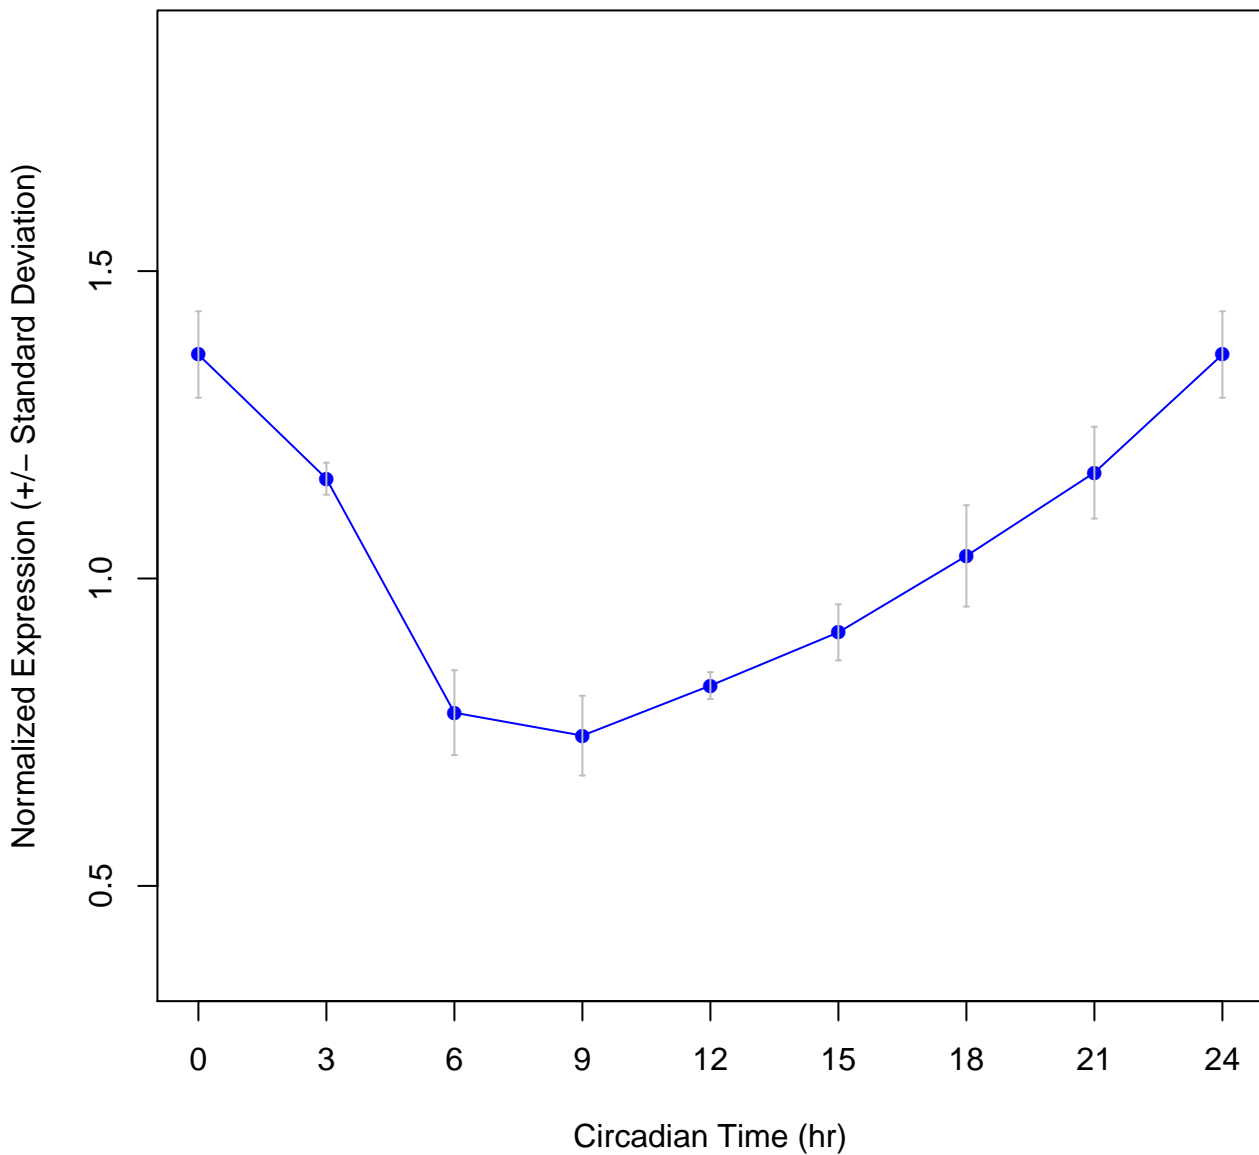

Supplement Figure 4 *ctbp2*

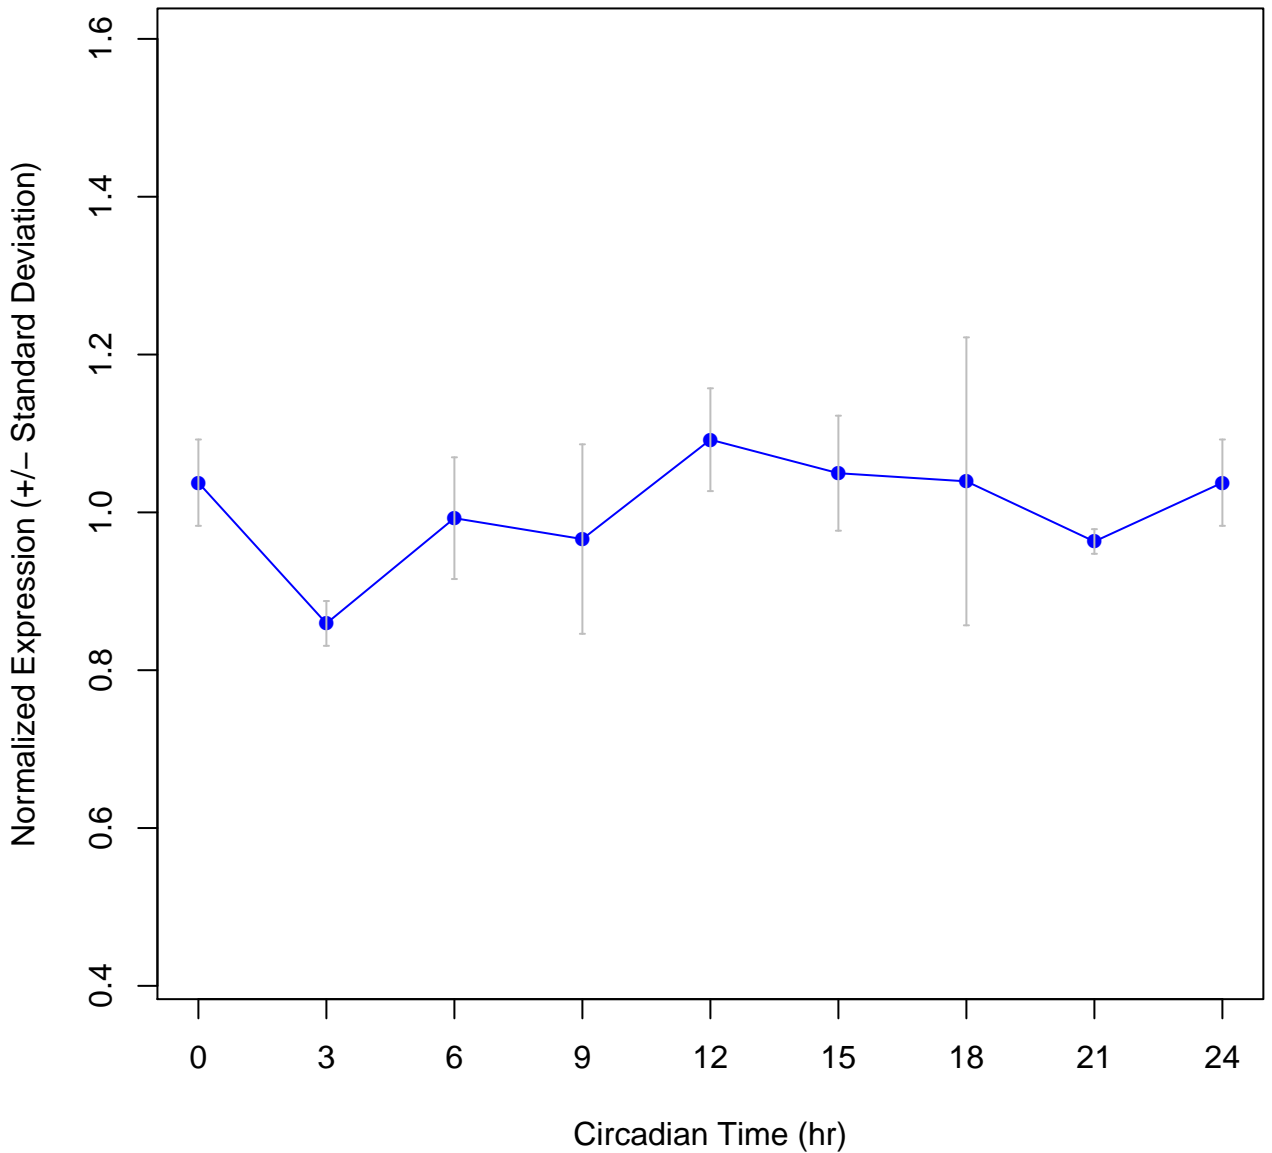

Supplement Figure 4 cul1

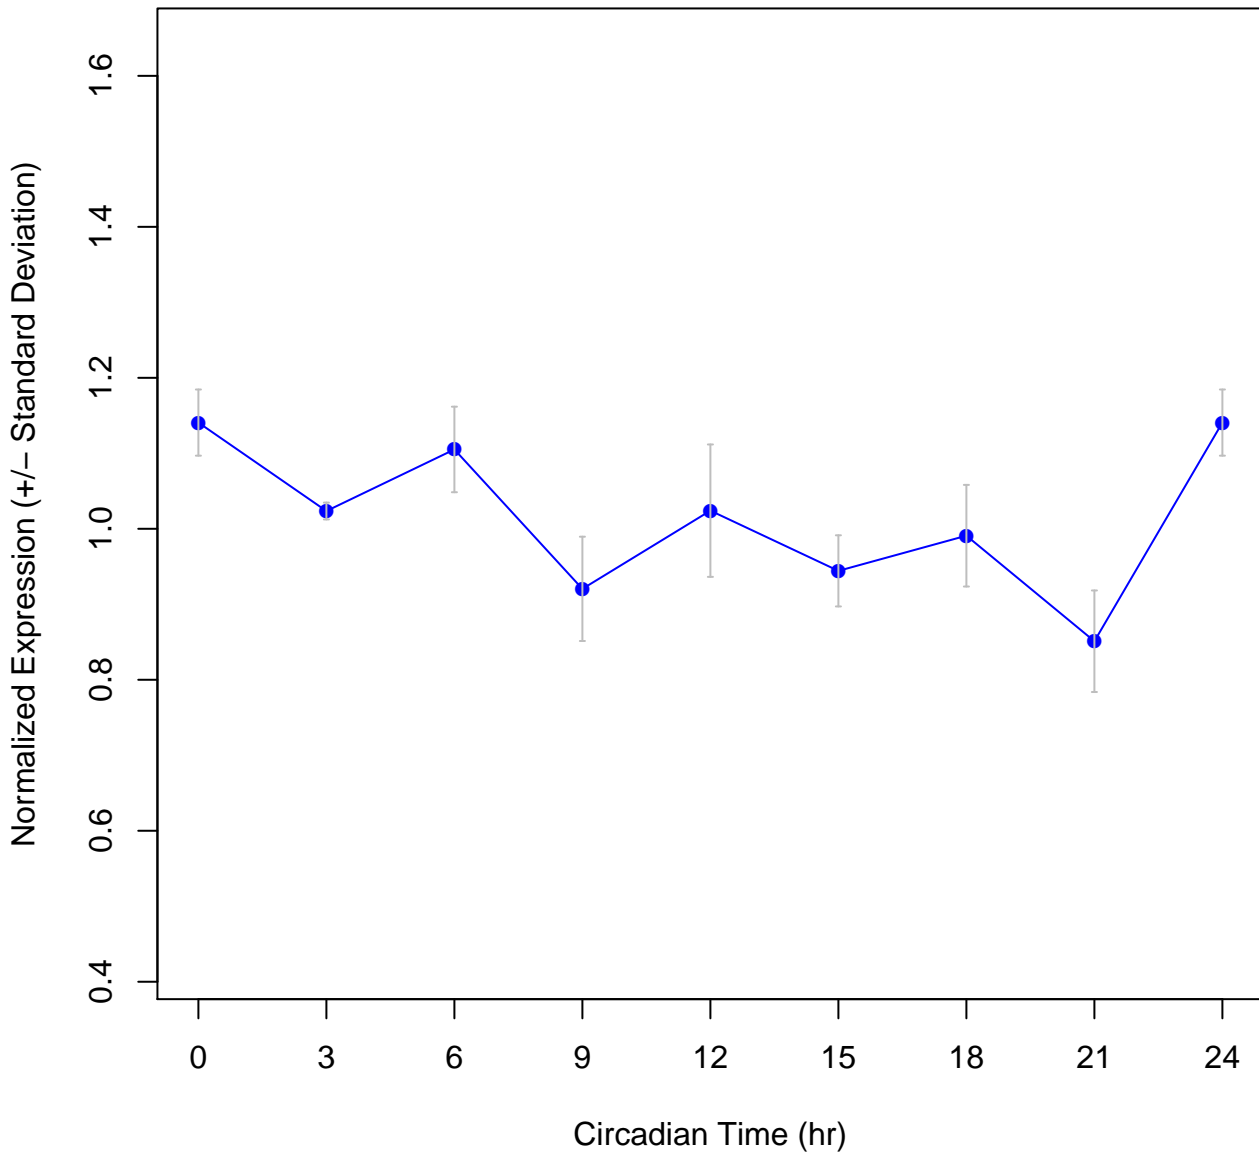



**Supplement Figure 4 cyp1**

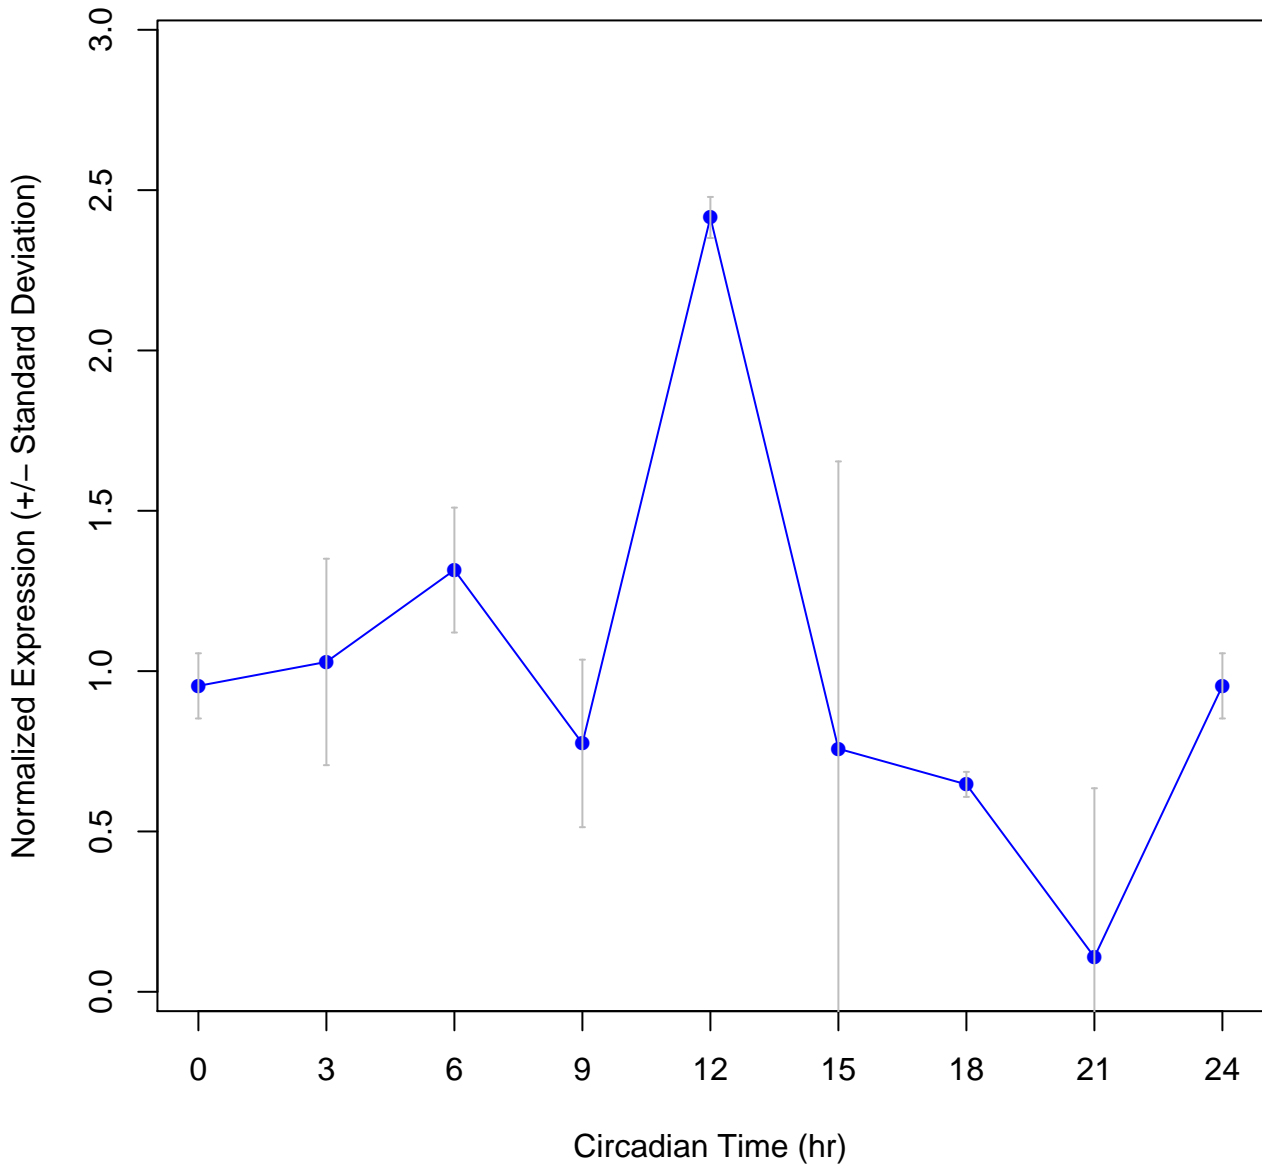

Supplement Figure 4 dct

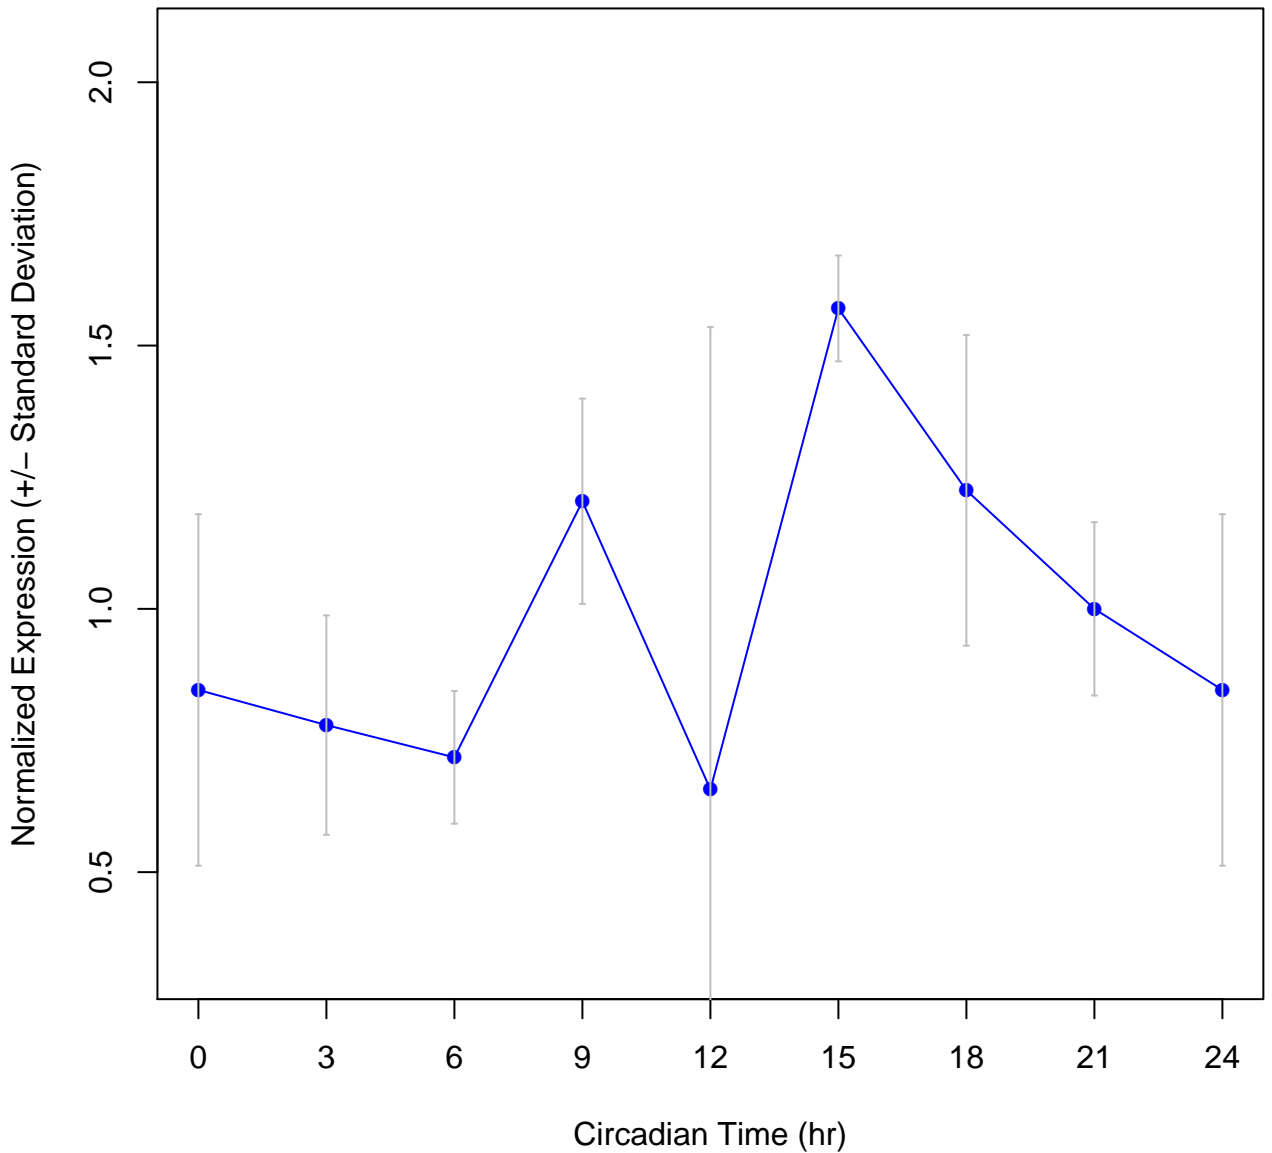

# Supplement Figure 4 ddb1

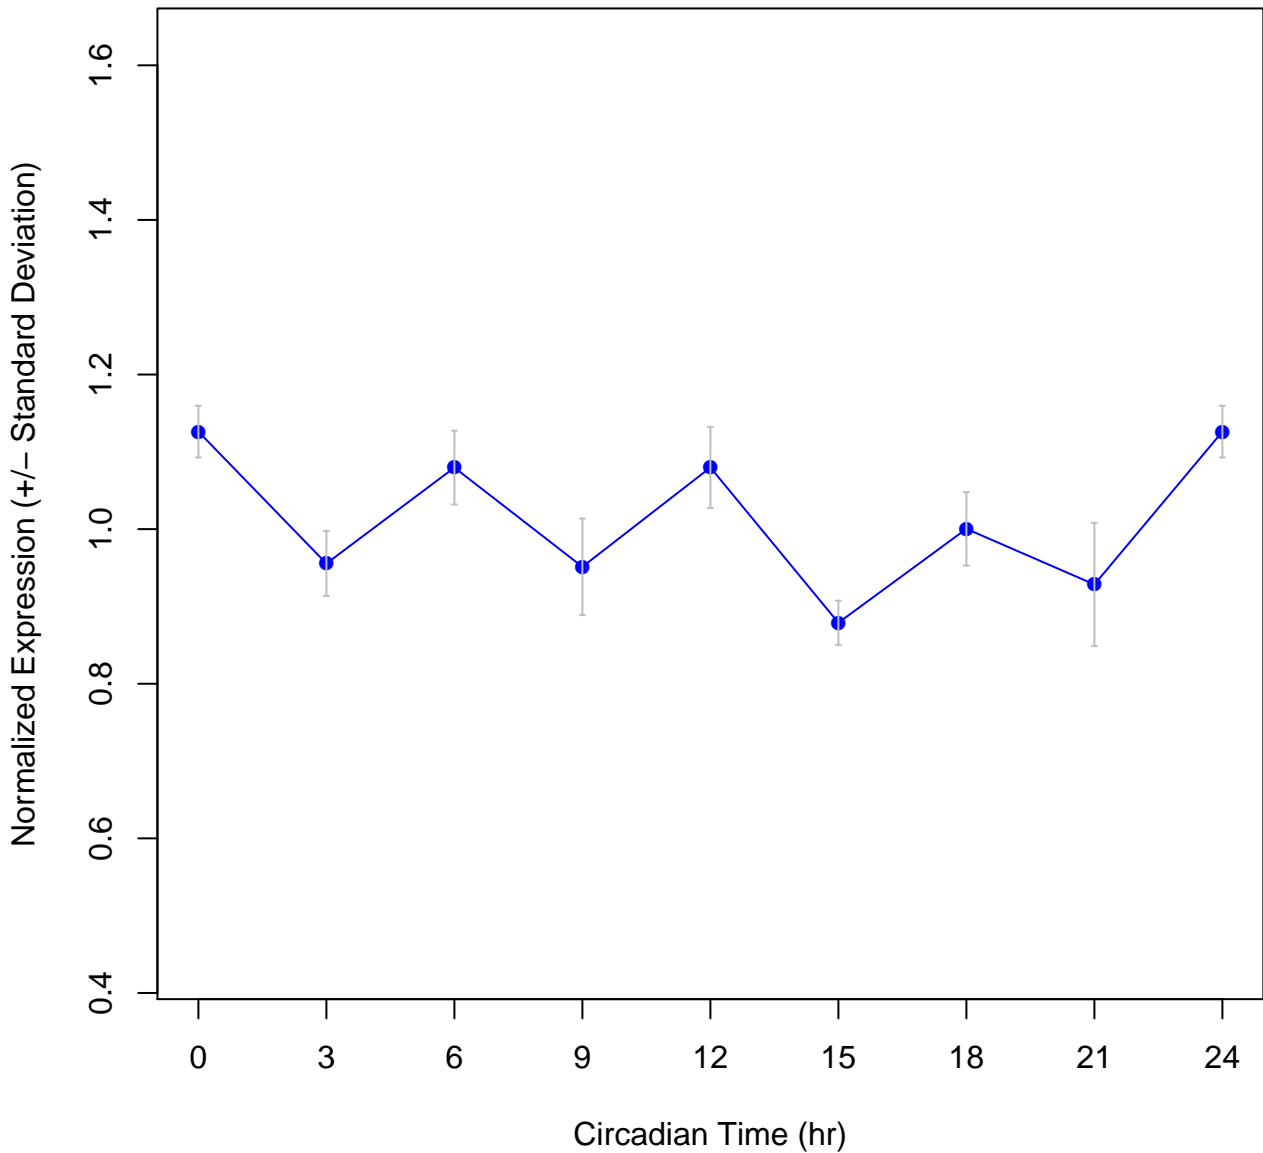

Supplement Figure 4 ddb2

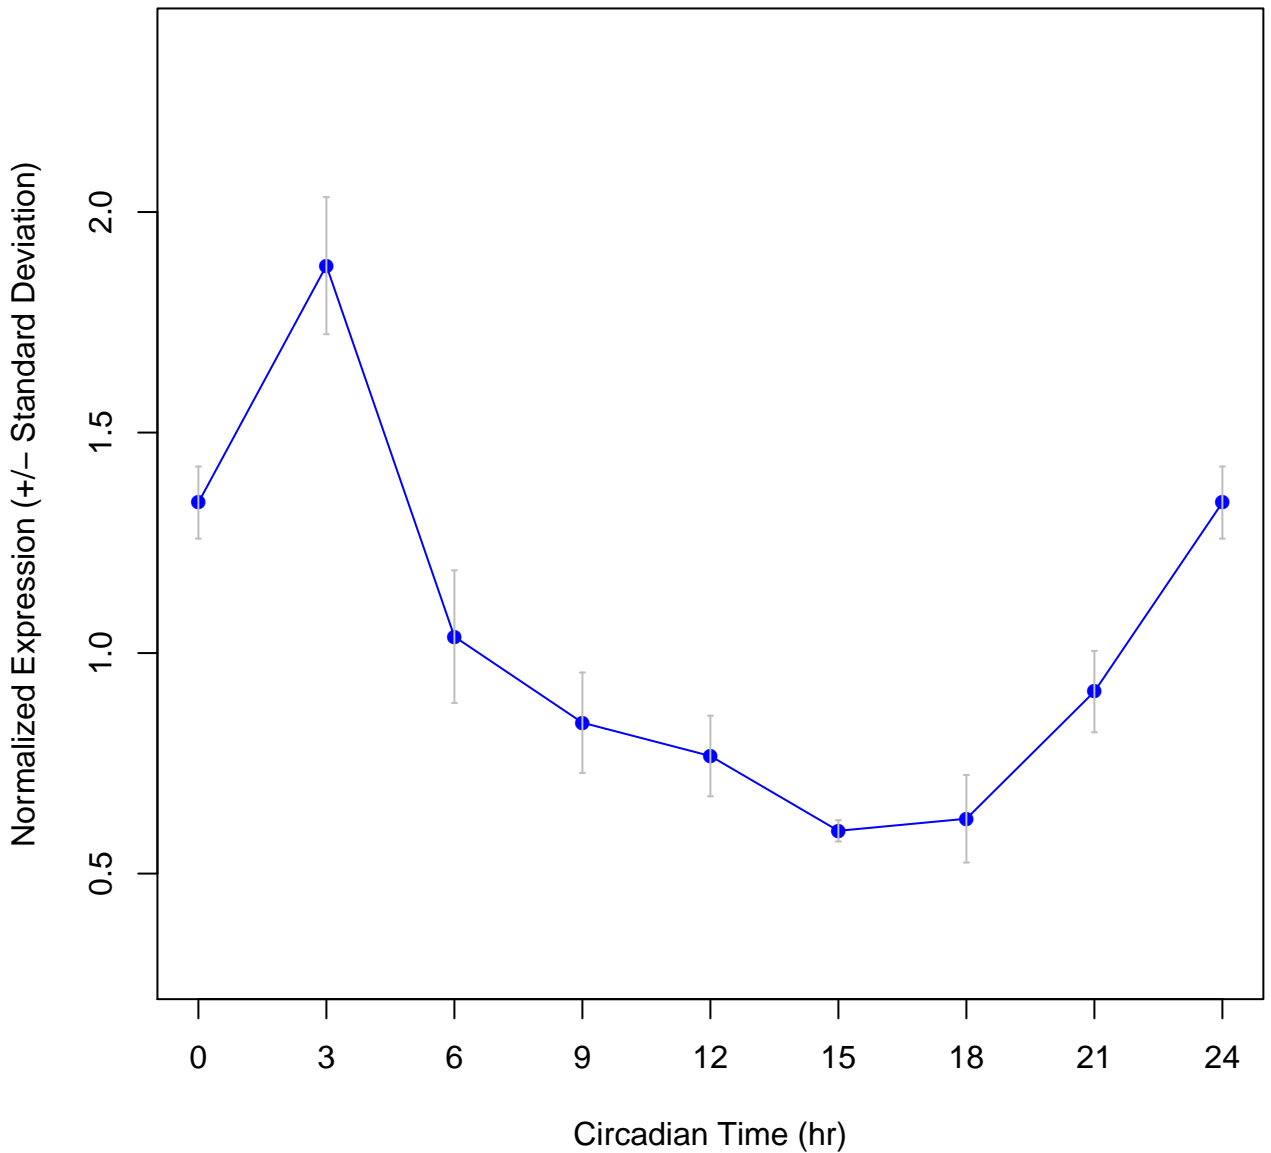

Supplement Figure 4 dio3

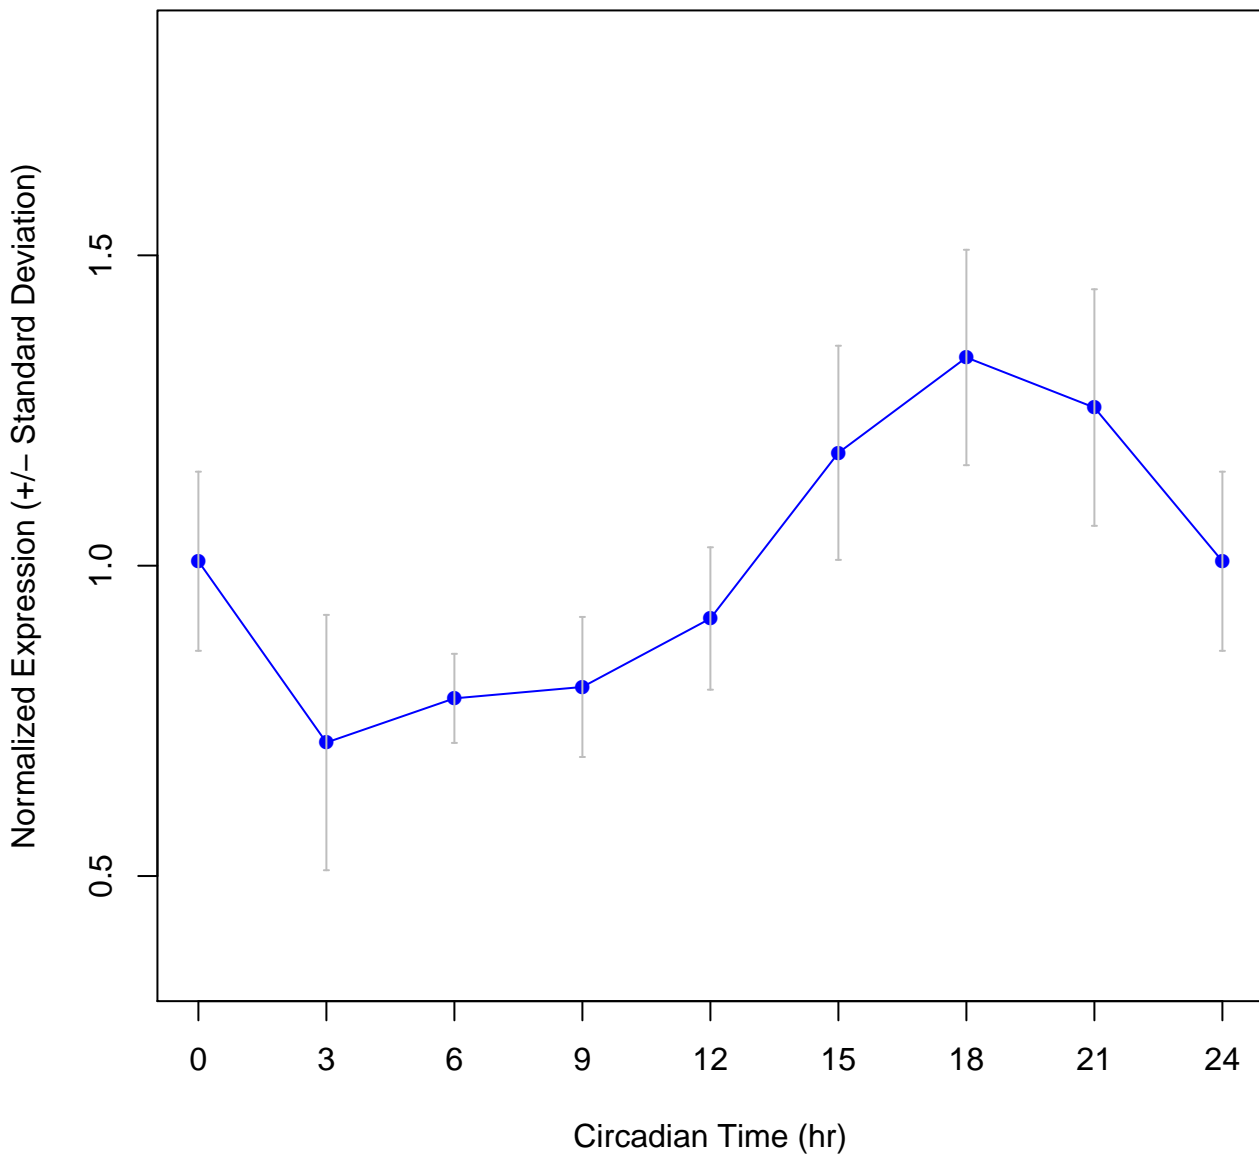

Supplement Figure 4 dnah7

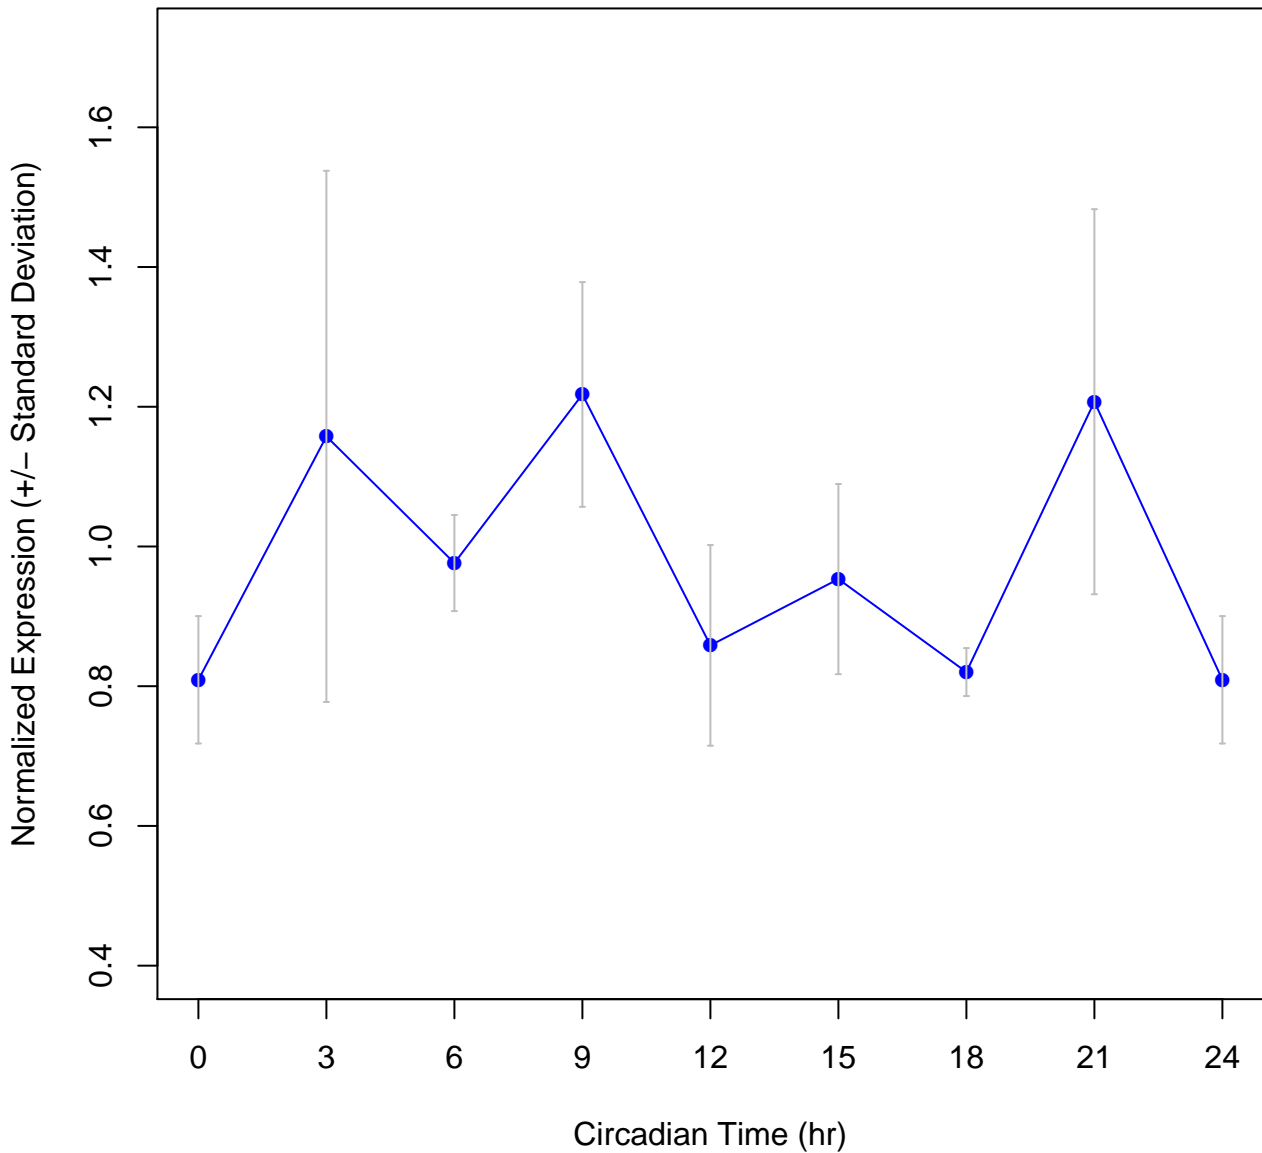

Supplement Figure 4 dnajb4

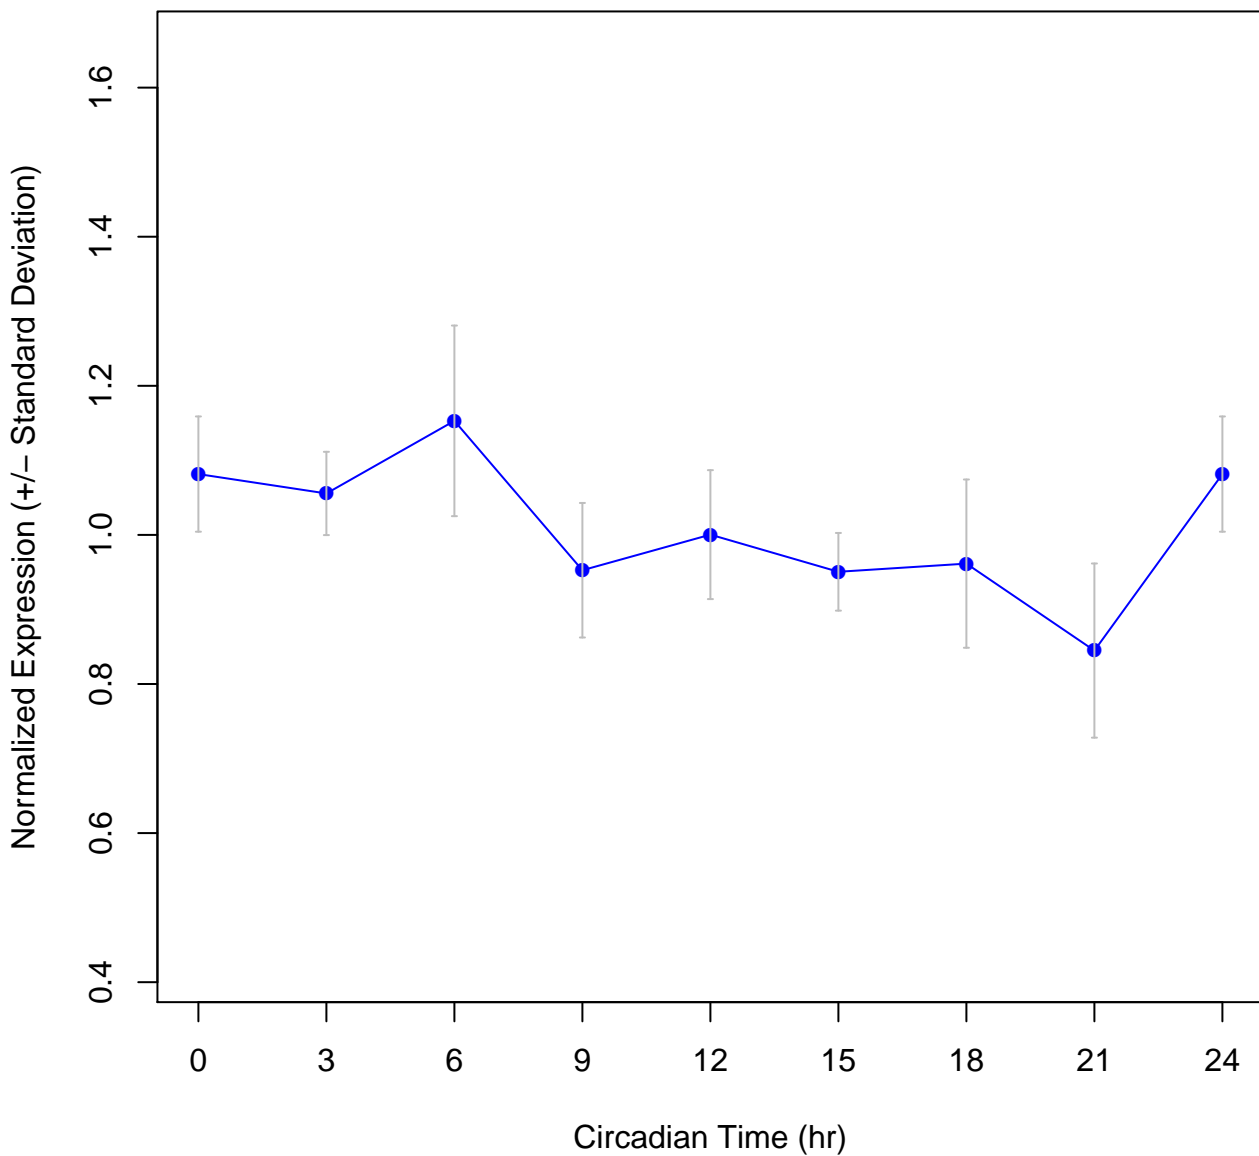

Supplement Figure 4 dscaml1

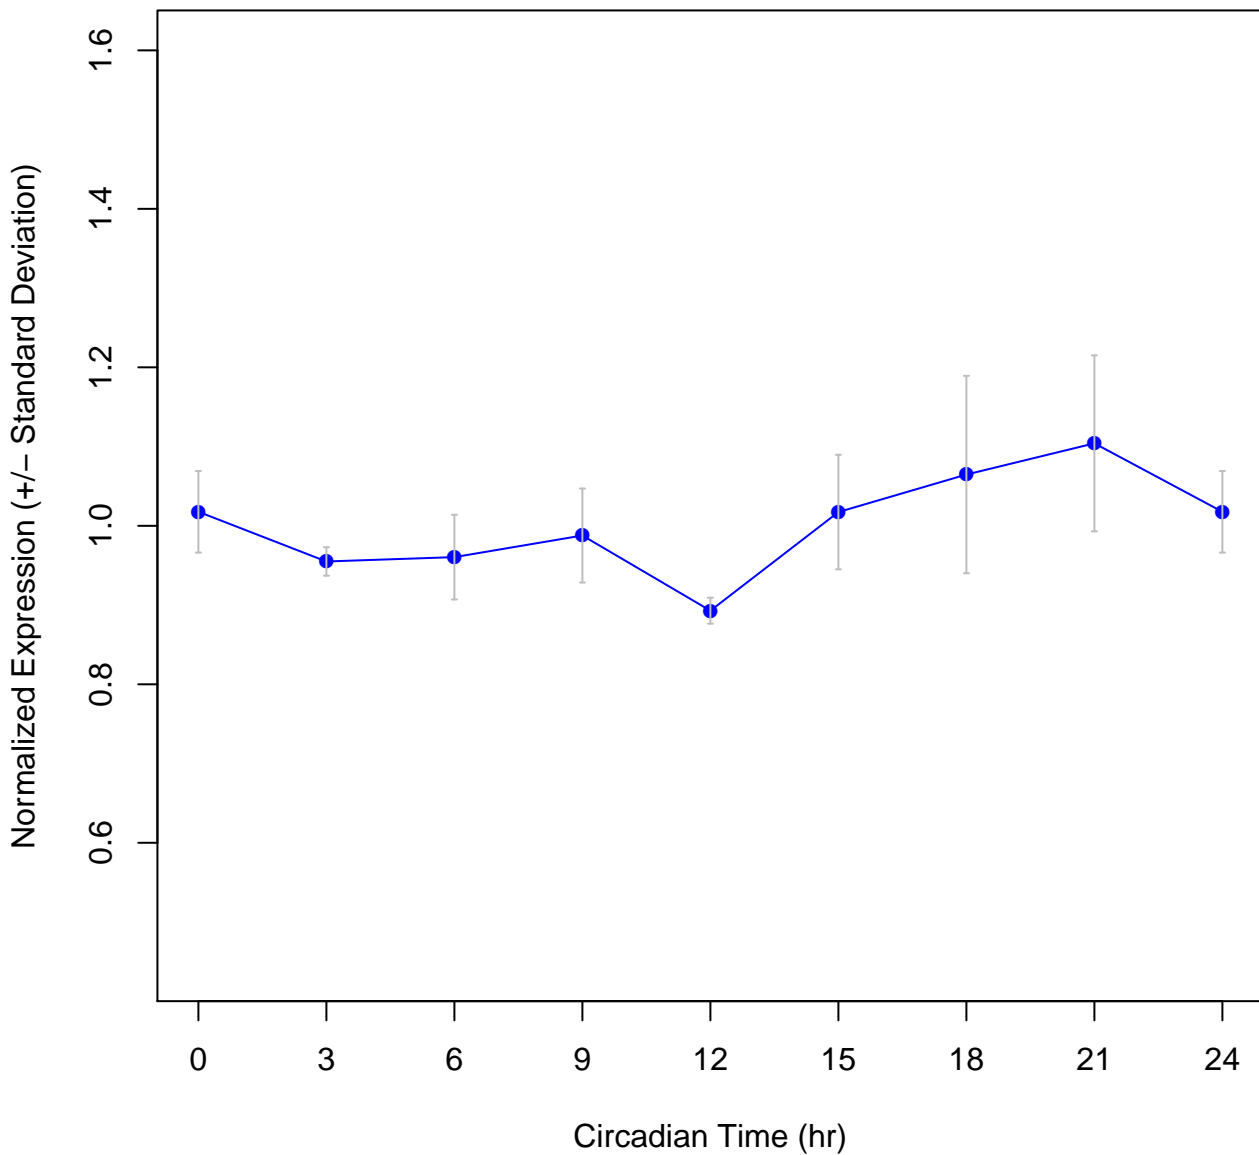



Supplement Figure 4 e2f

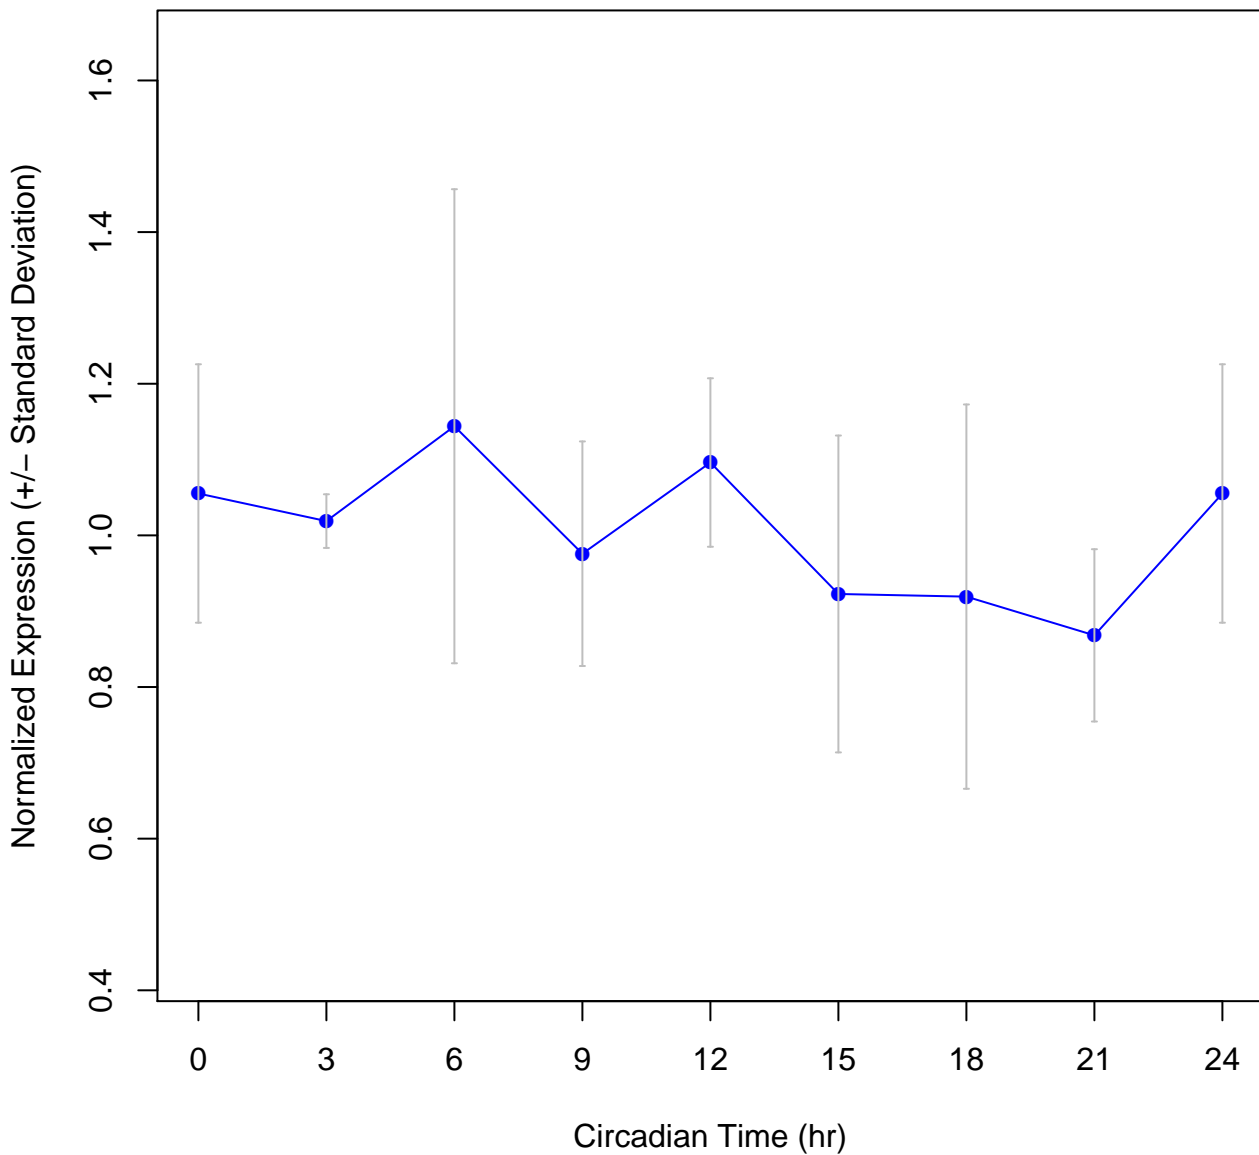

Supplement Figure 4 ect2

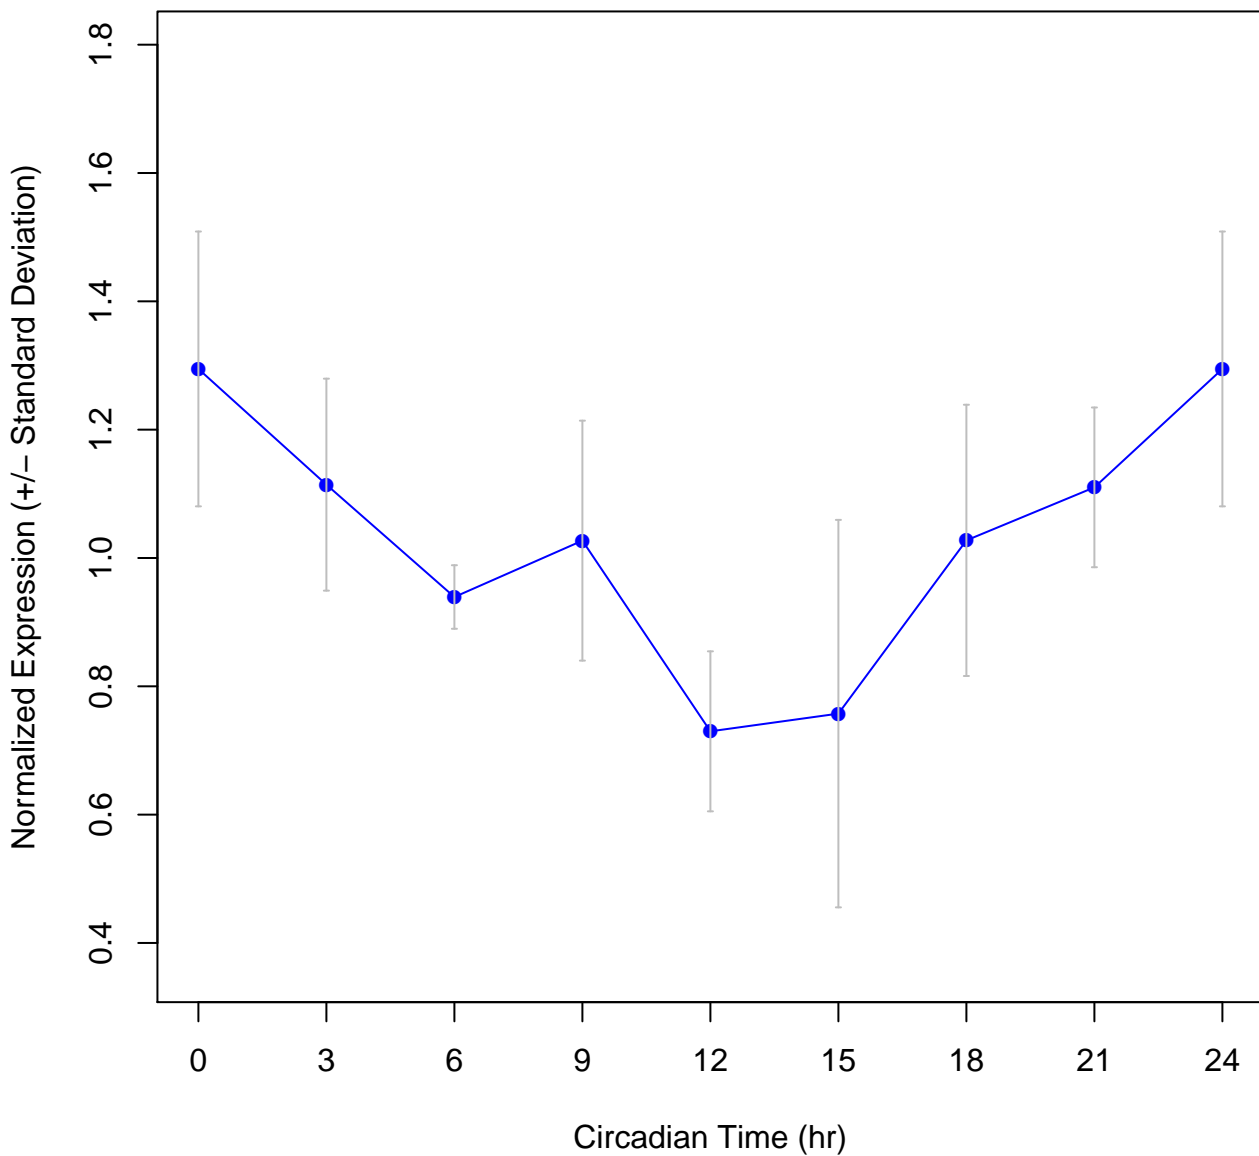

Supplement Figure 4 enox1

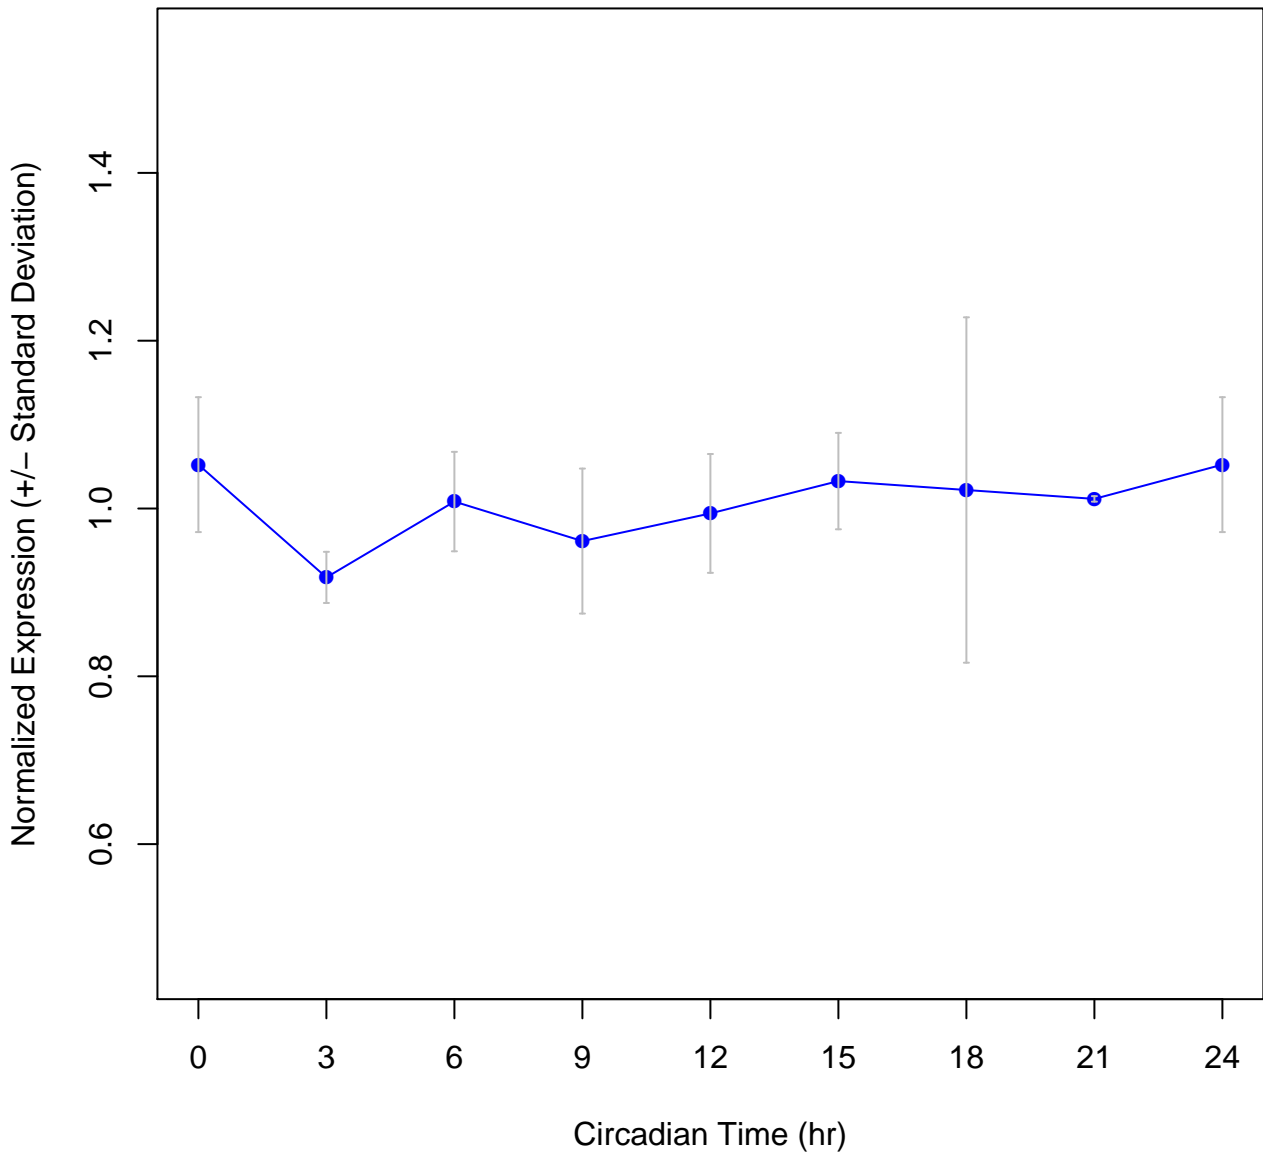

Supplement Figure 4 enox2

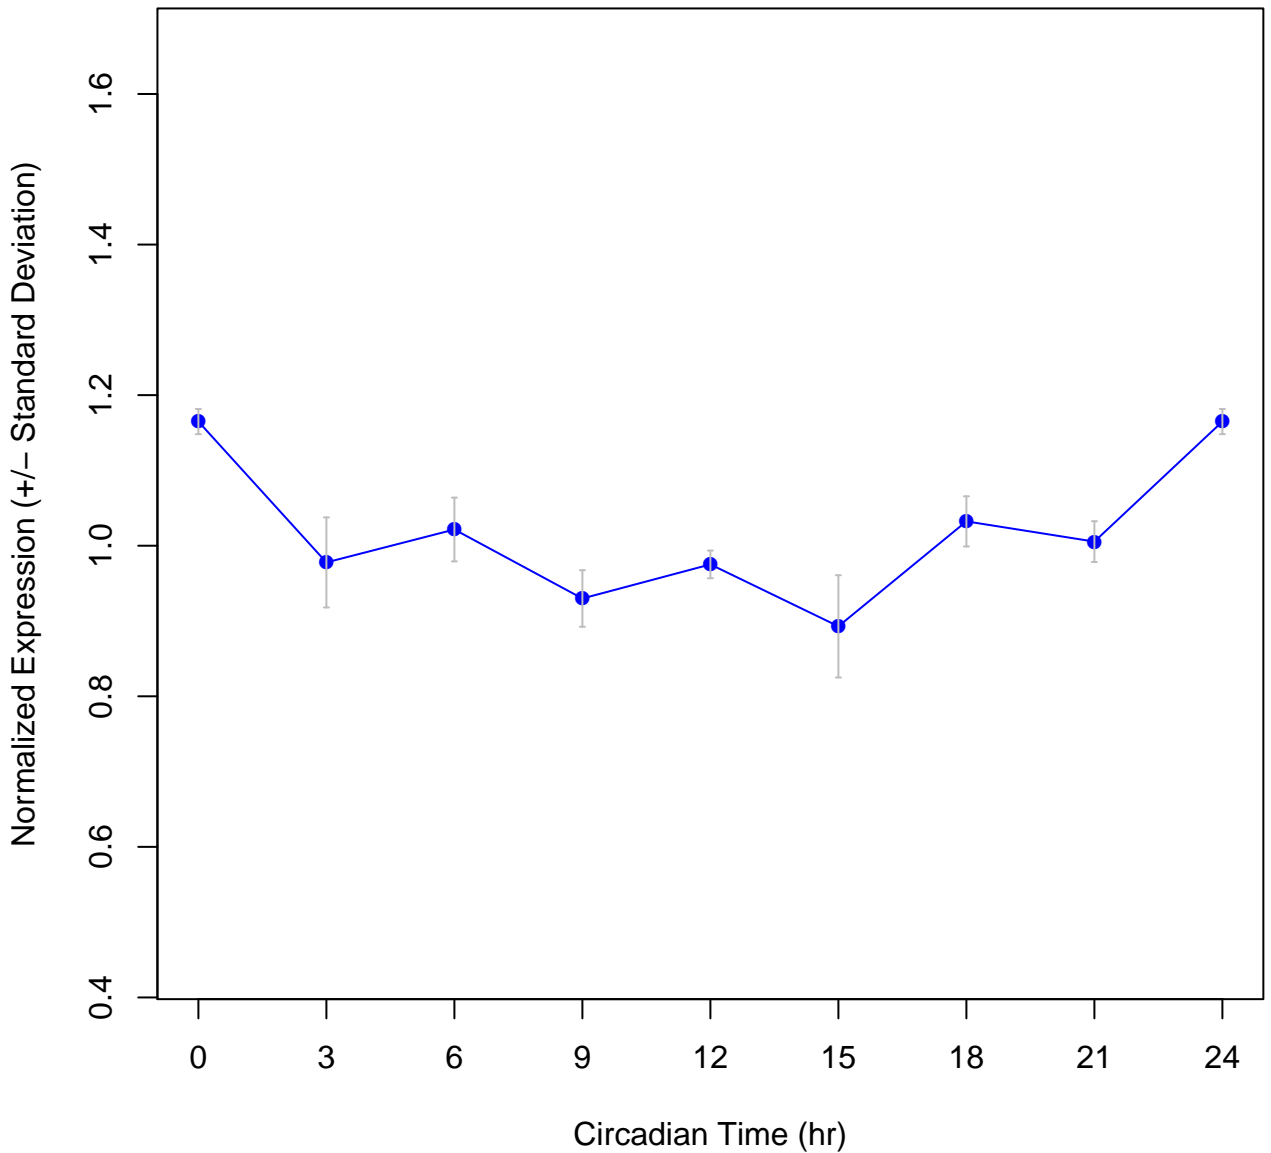

Supplement Figure 4 ensxmag00000013922

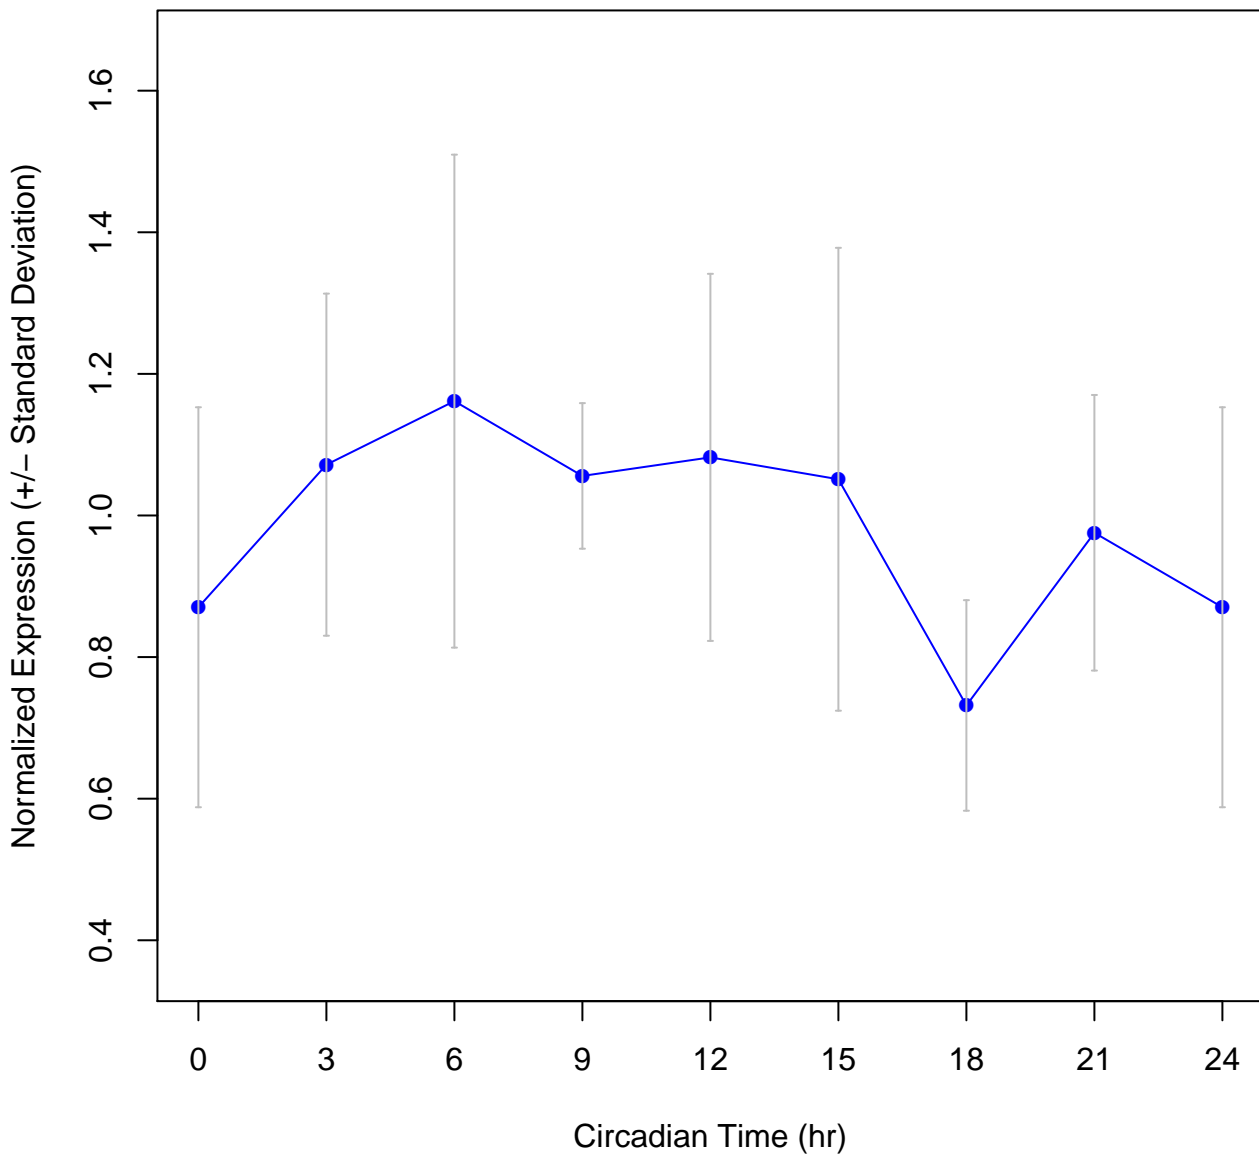

**Supplement Figure 4 ensxmag00000017815**

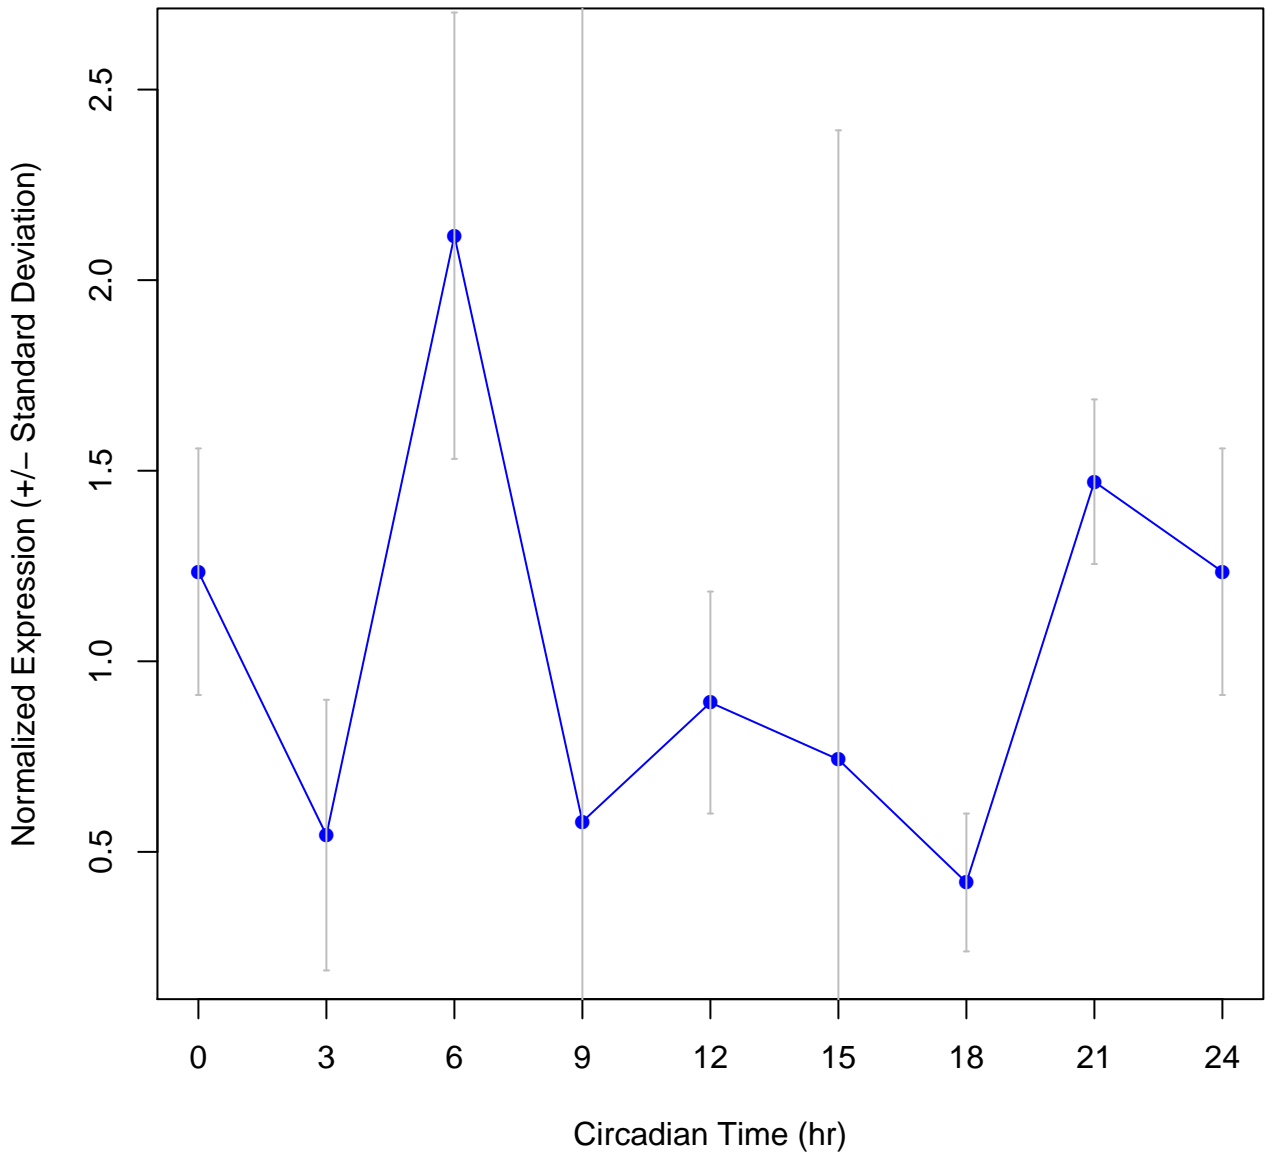

## Supplement Figure 4 ercc3

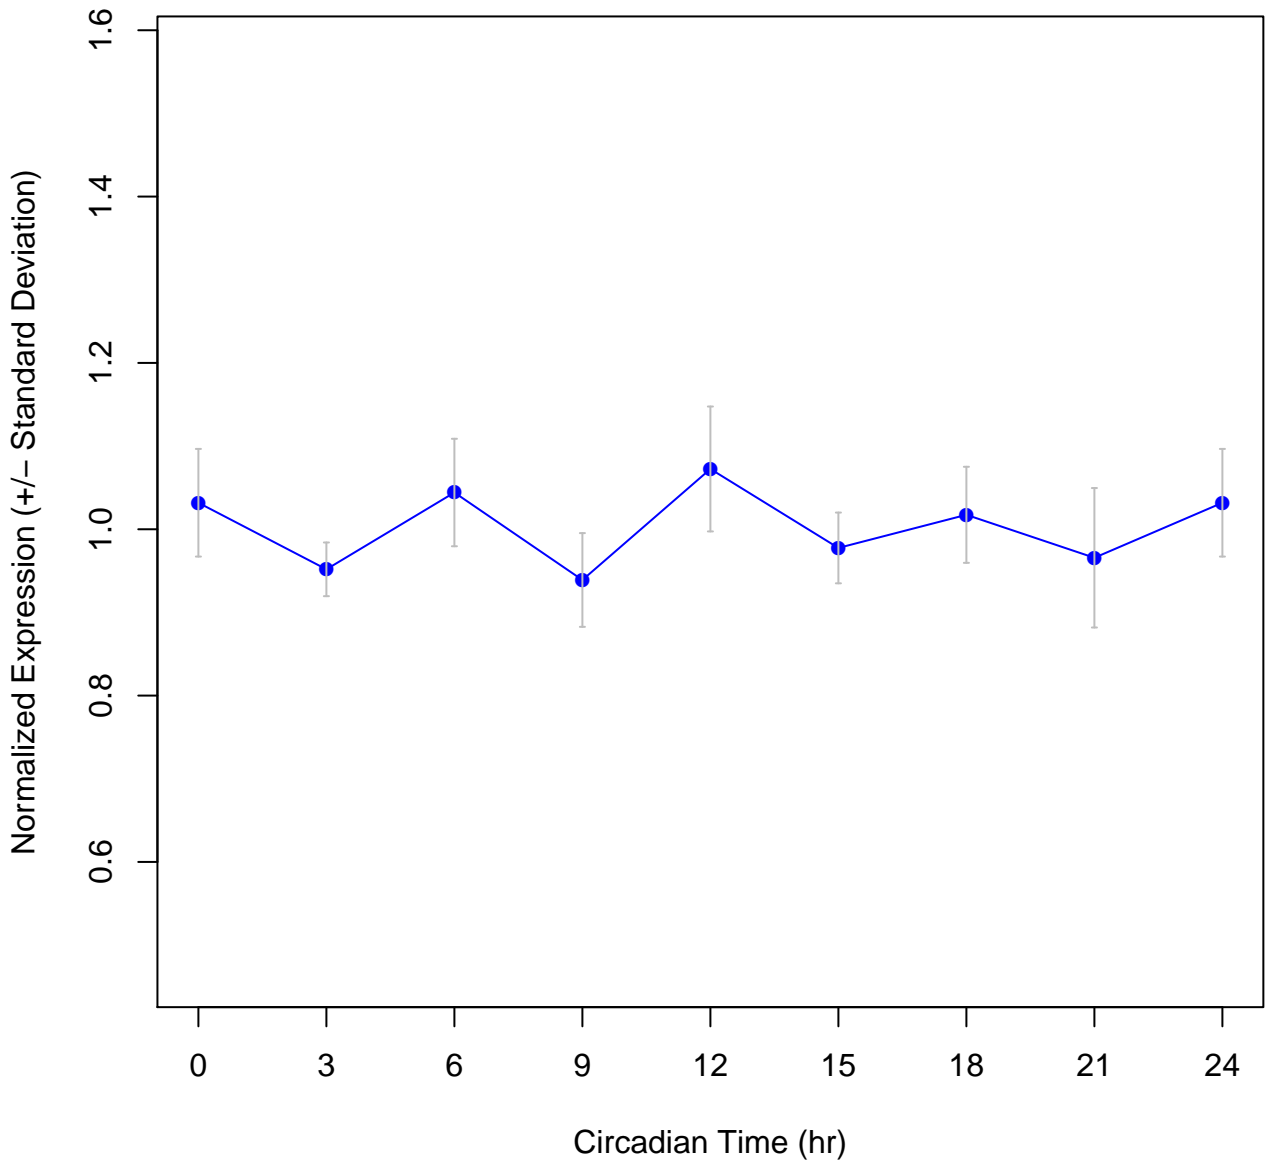

Supplement Figure 4 espl1

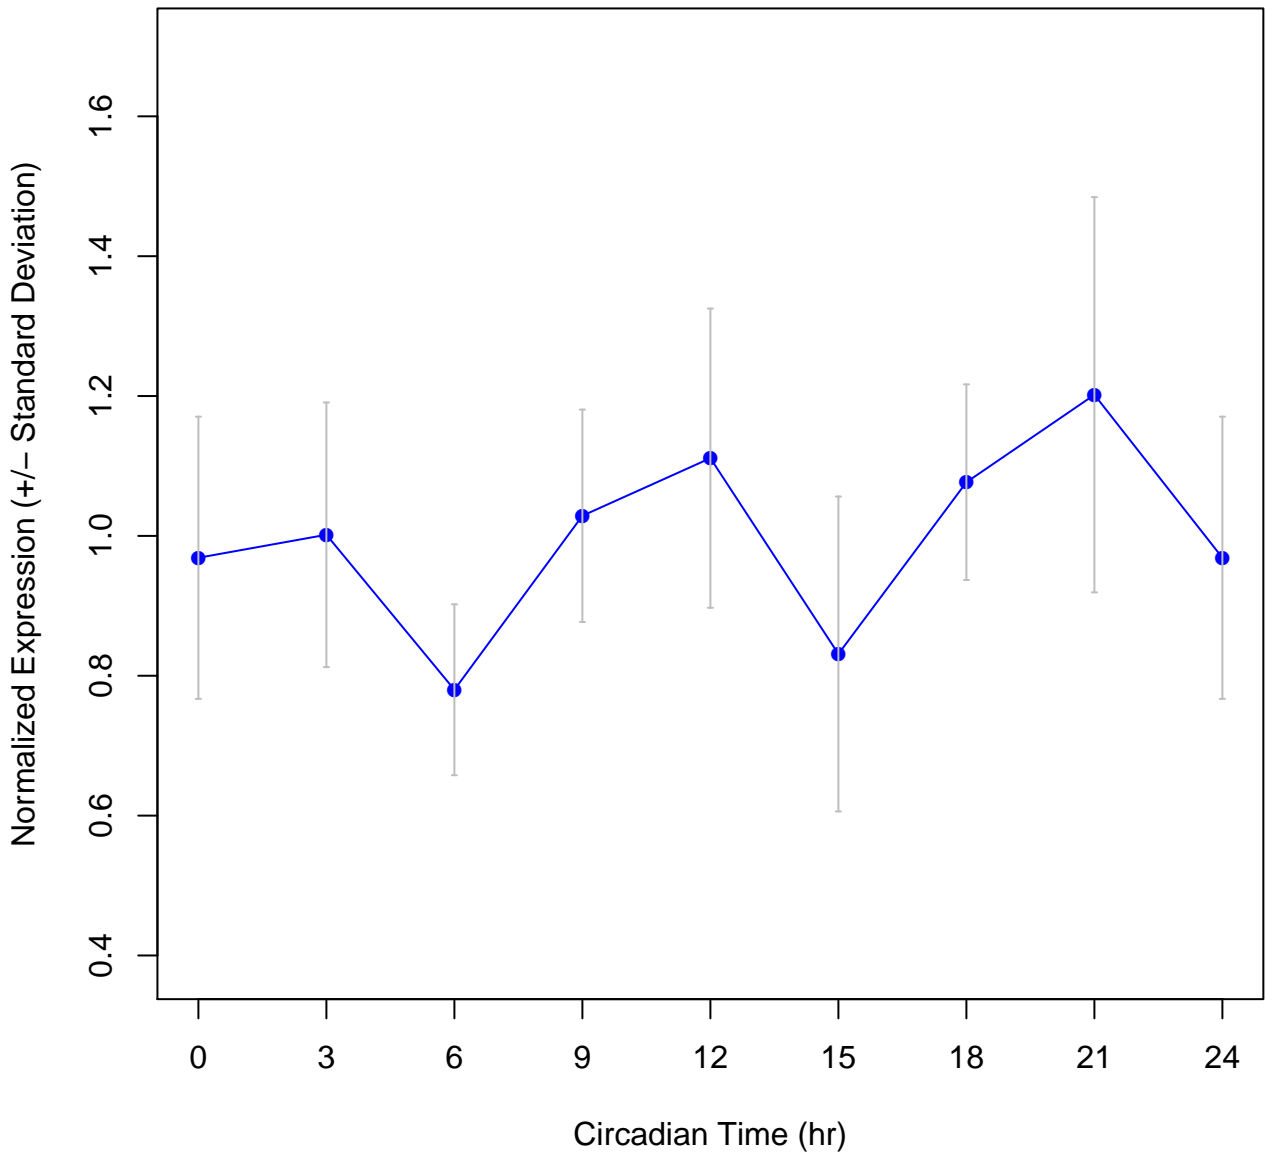



Supplement Figure 4 ezr

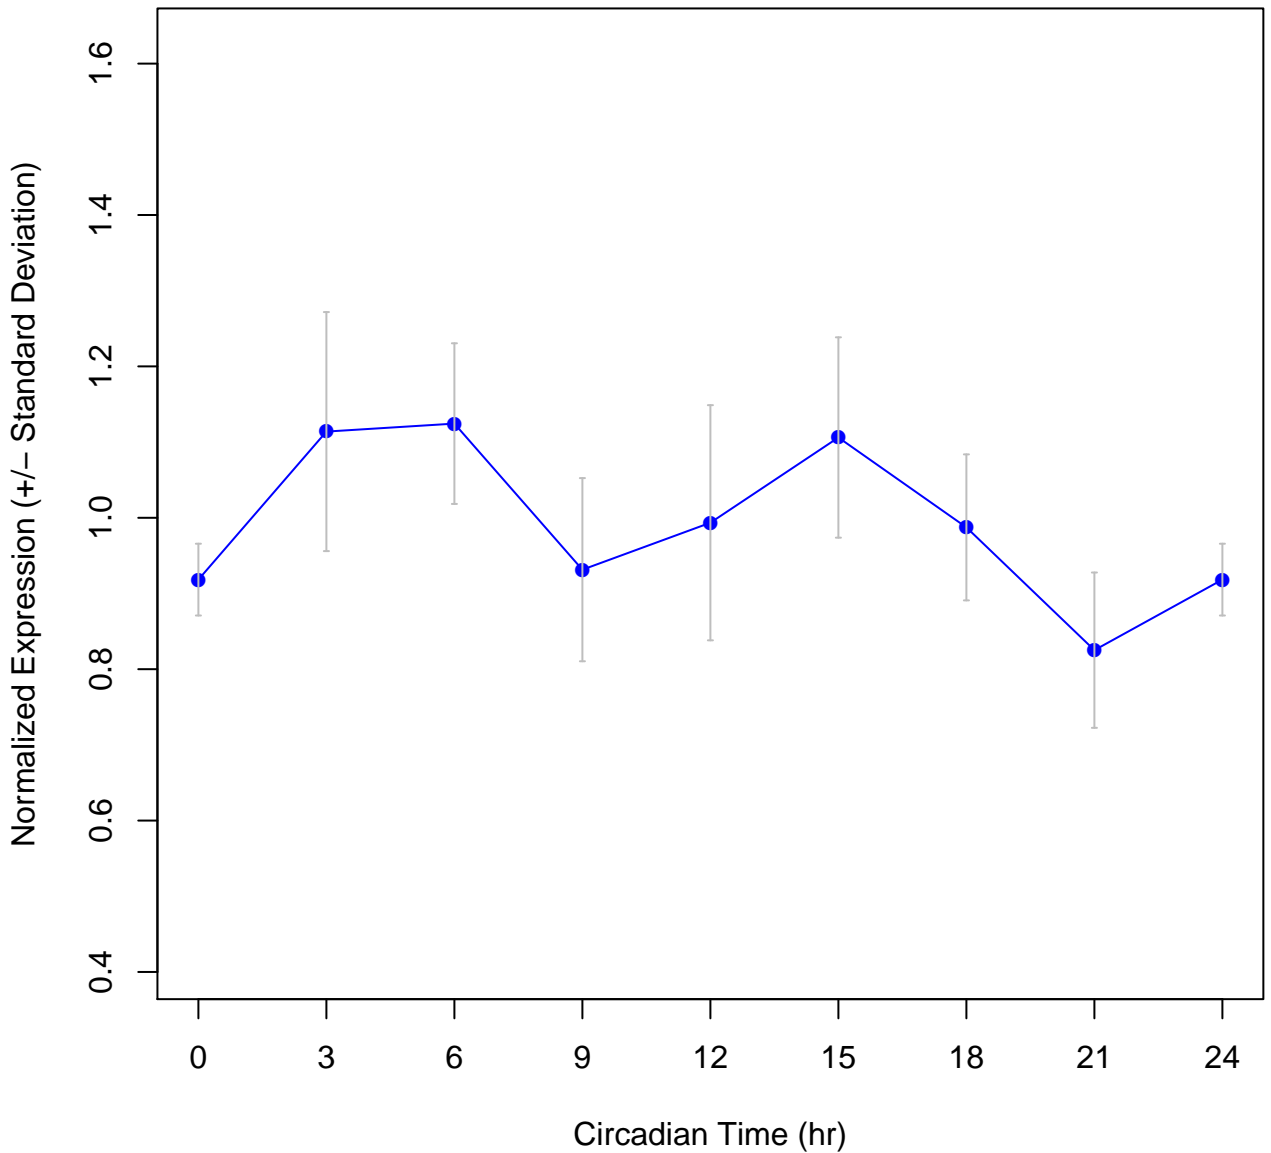

Supplement Figure 4 fam102b

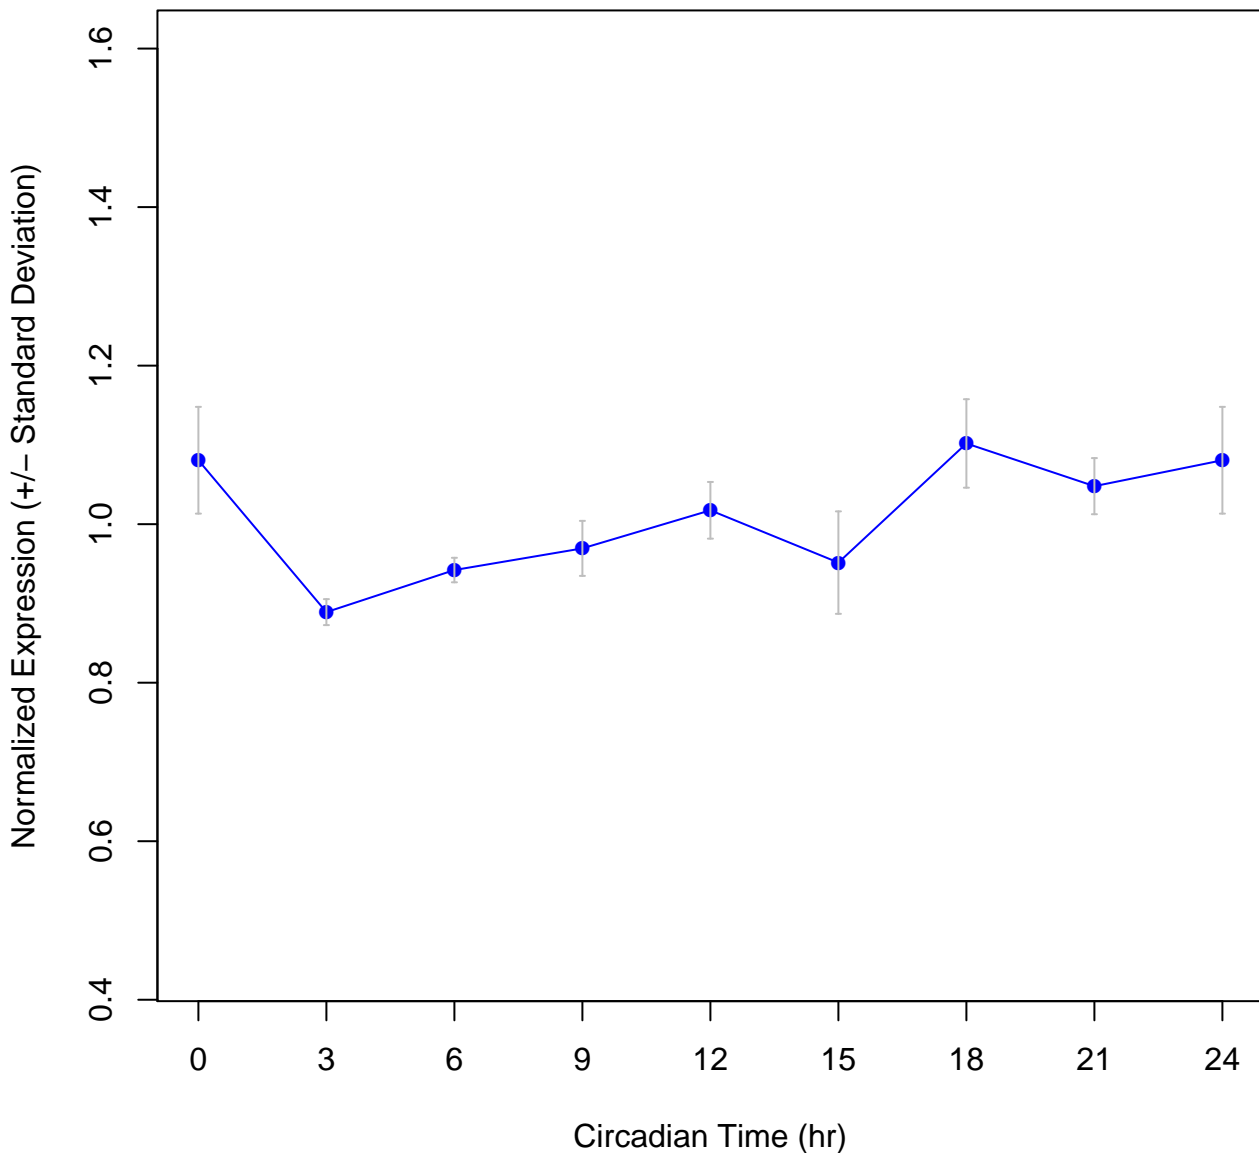

Supplement Figure 4 fasn

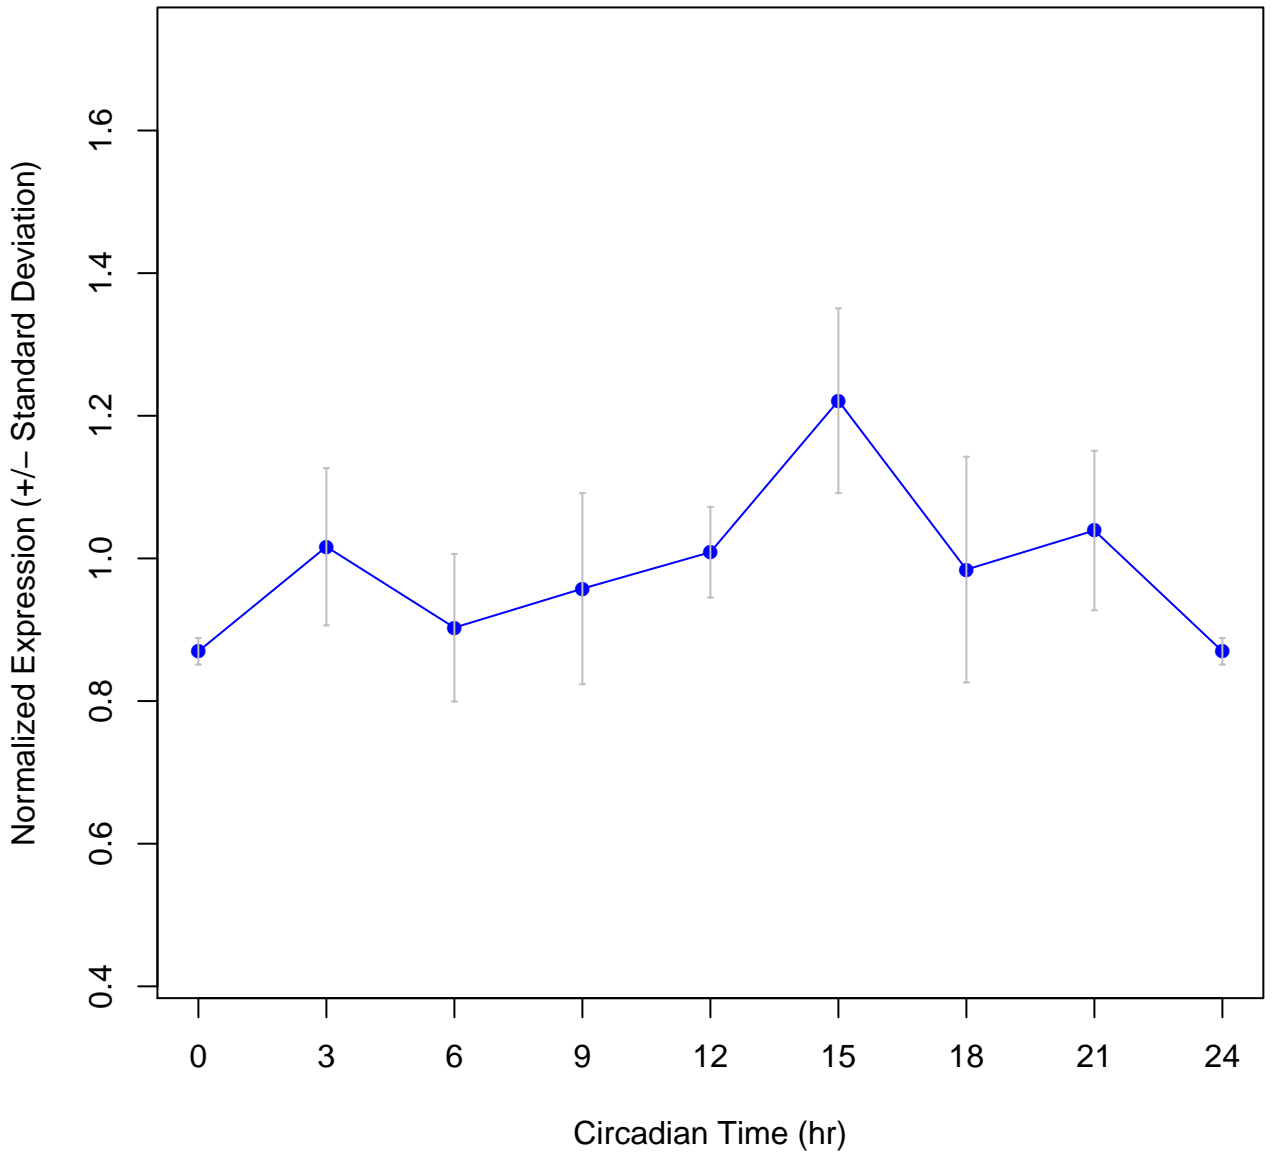

Supplement Figure 4 fbxw11

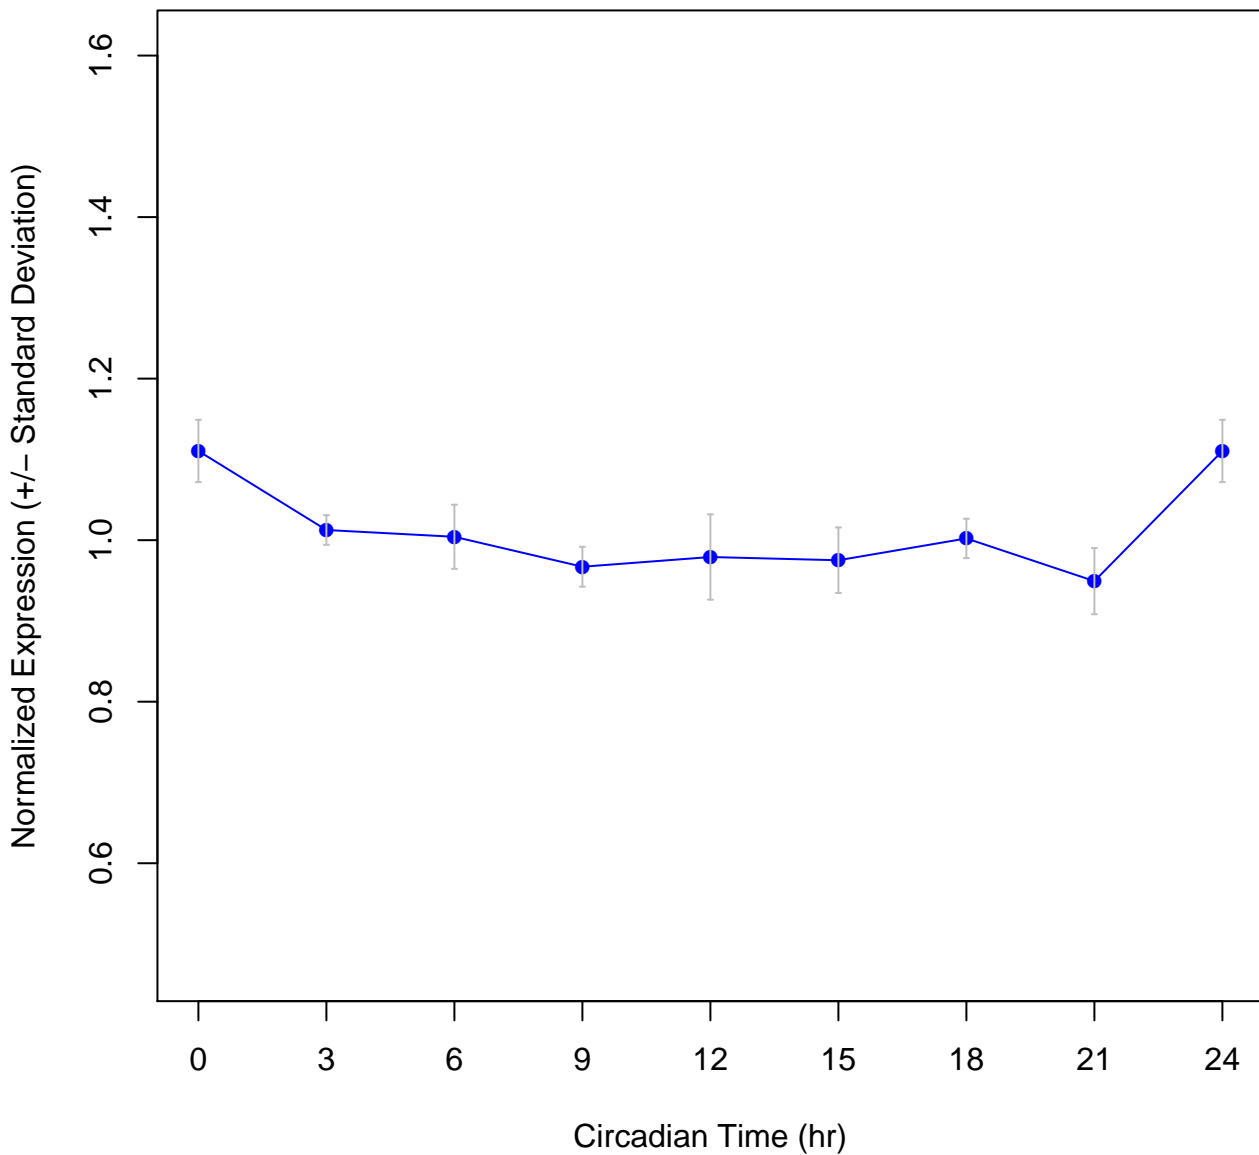

Supplement Figure 4 fggy

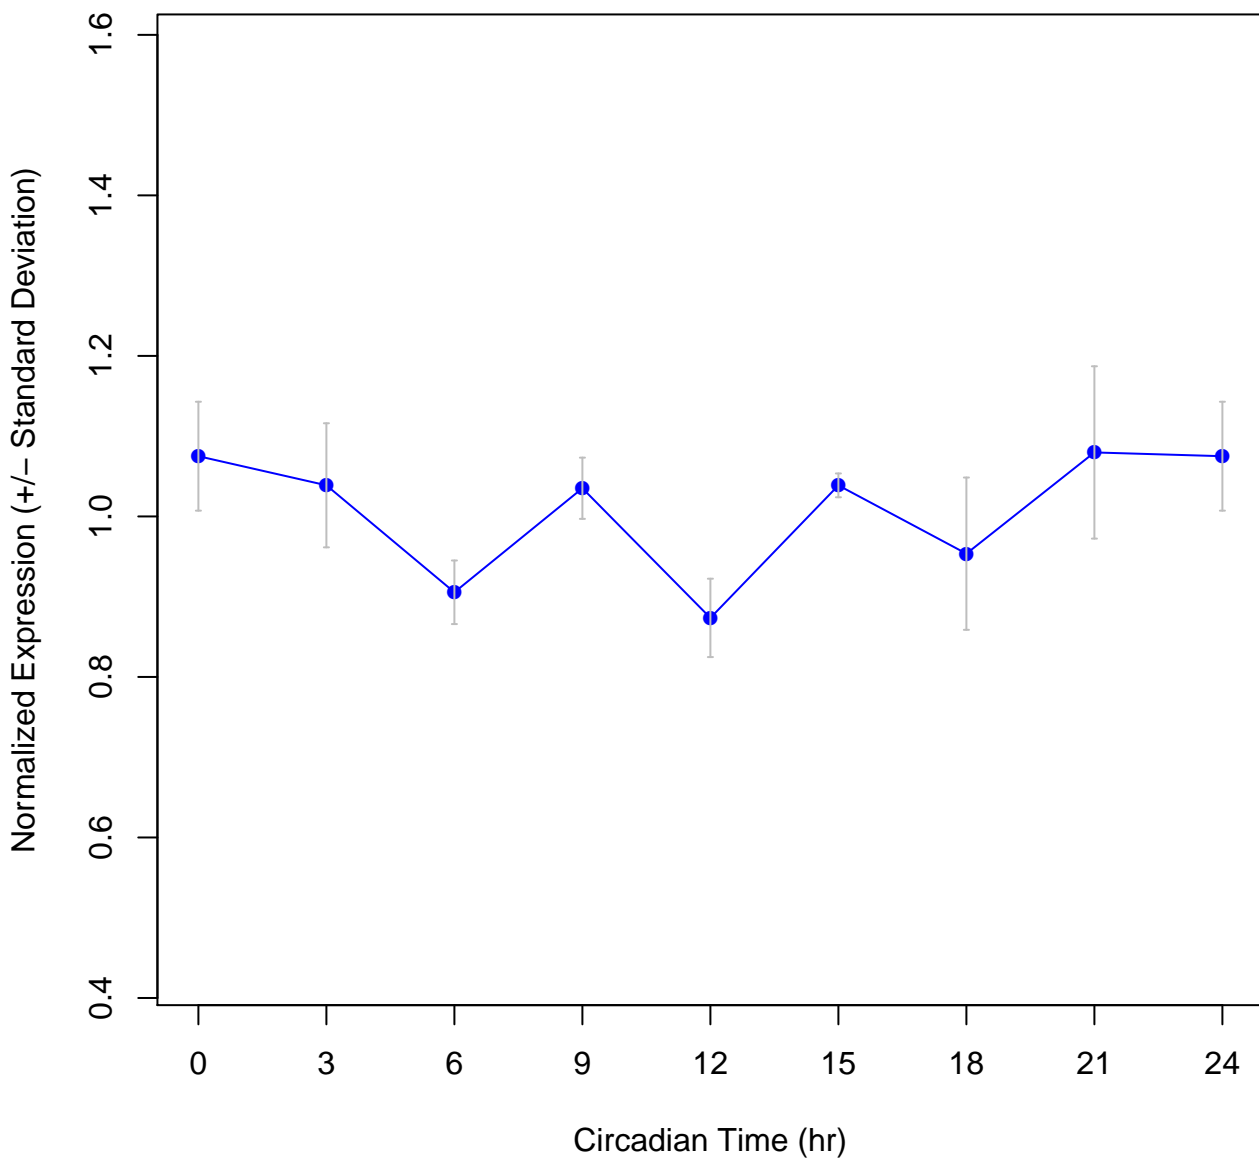

Supplement Figure 4 flt4

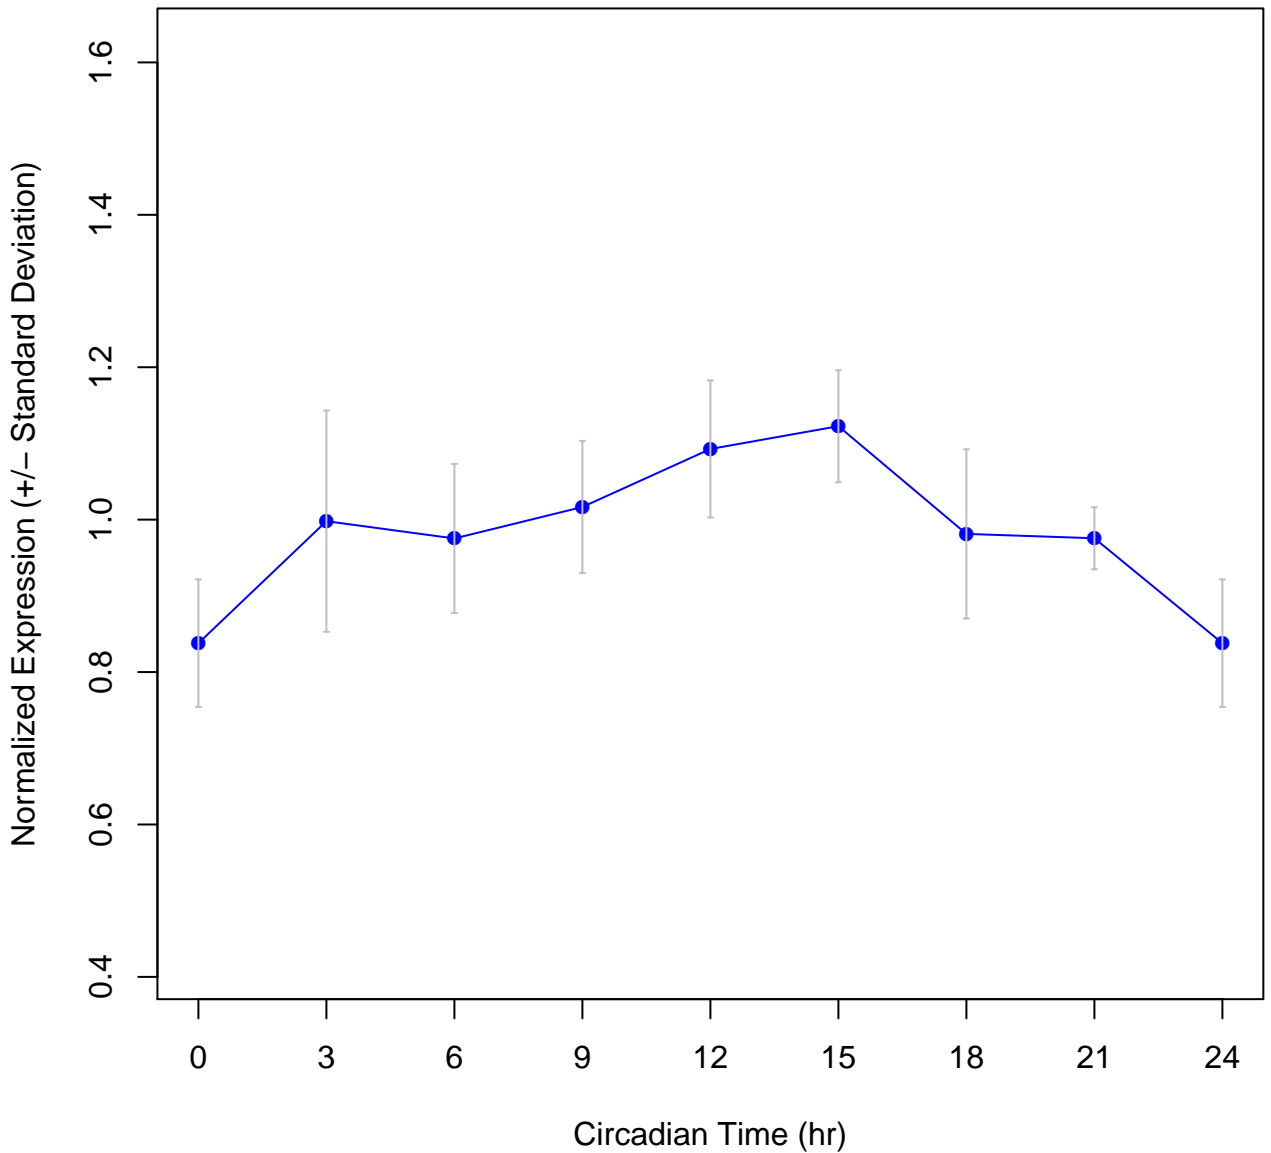

### Supplement Figure 4 foxn1

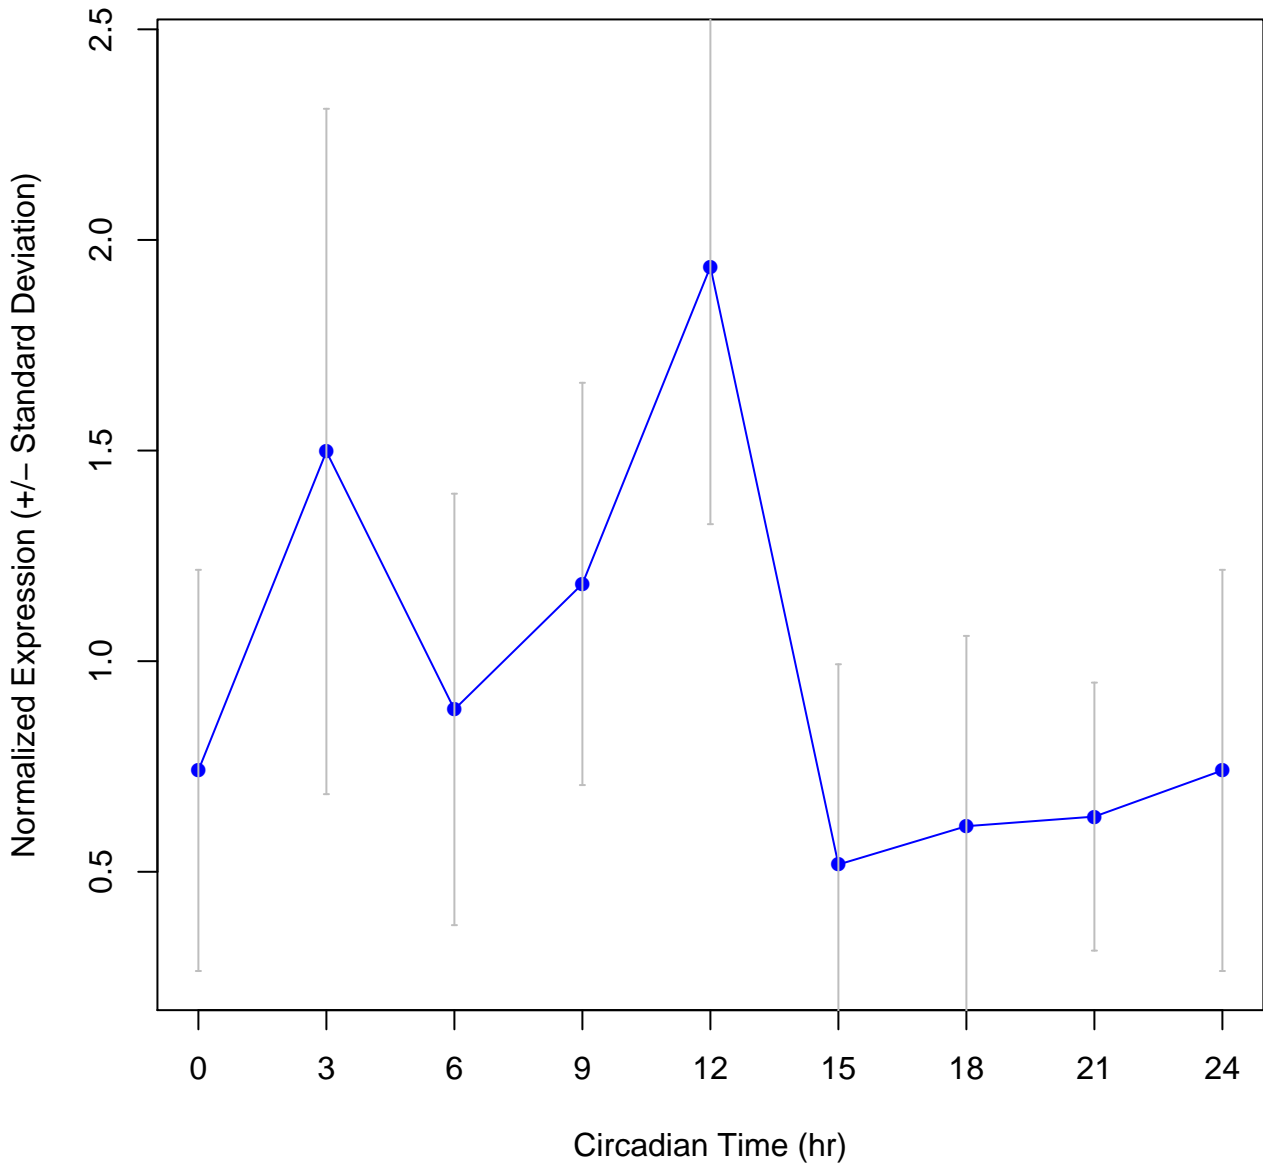

### Supplement Figure 4 foxo4

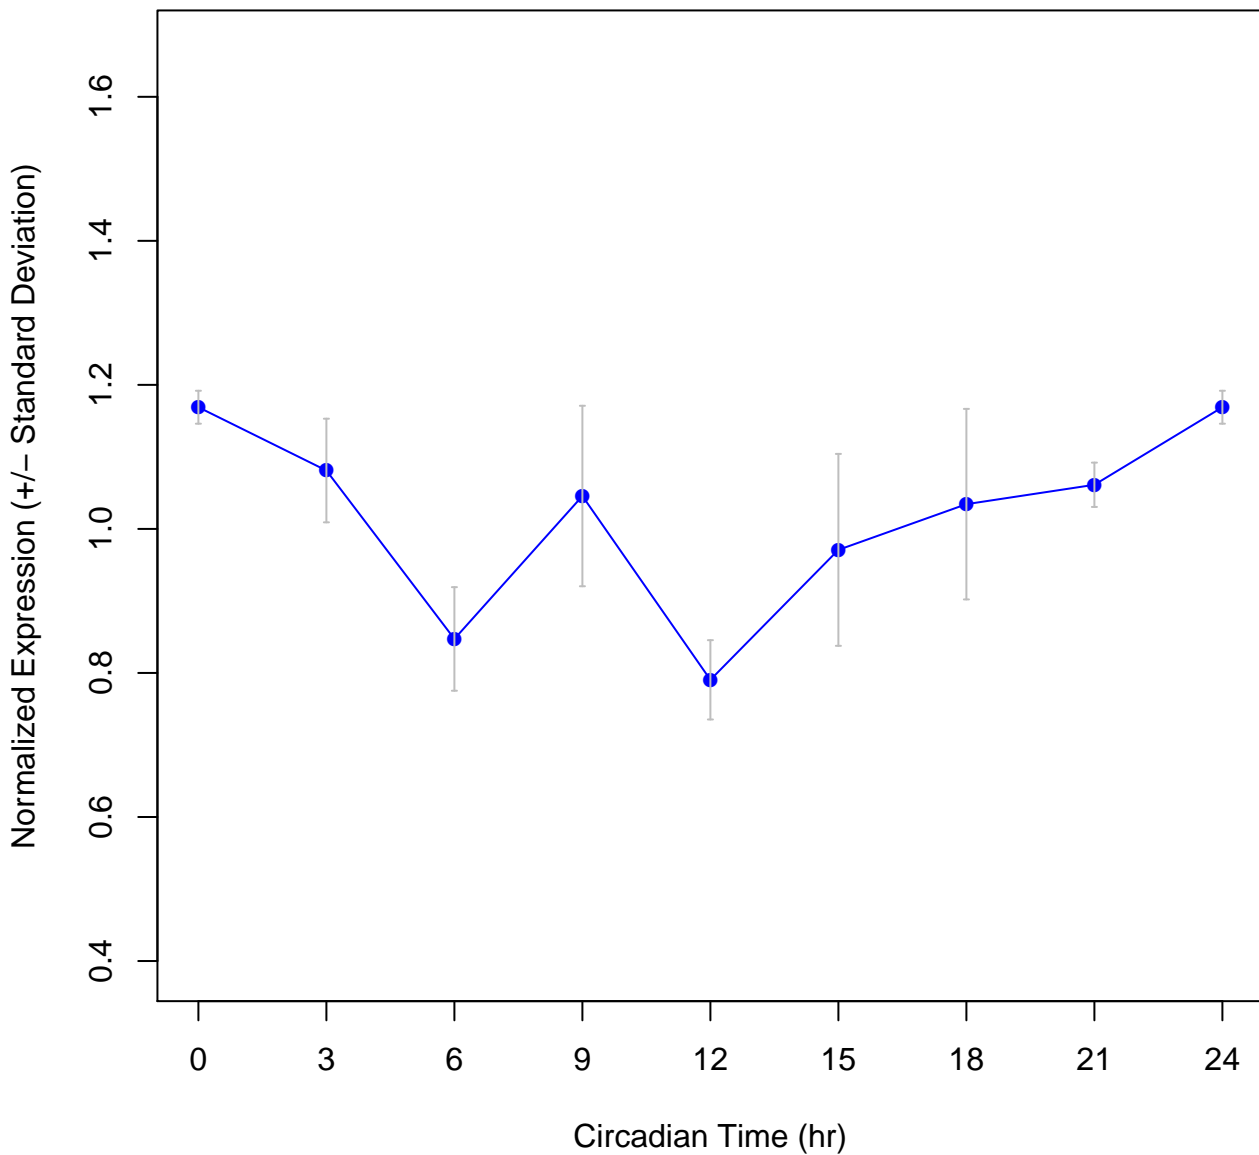



### Supplement Figure 4 g2e3

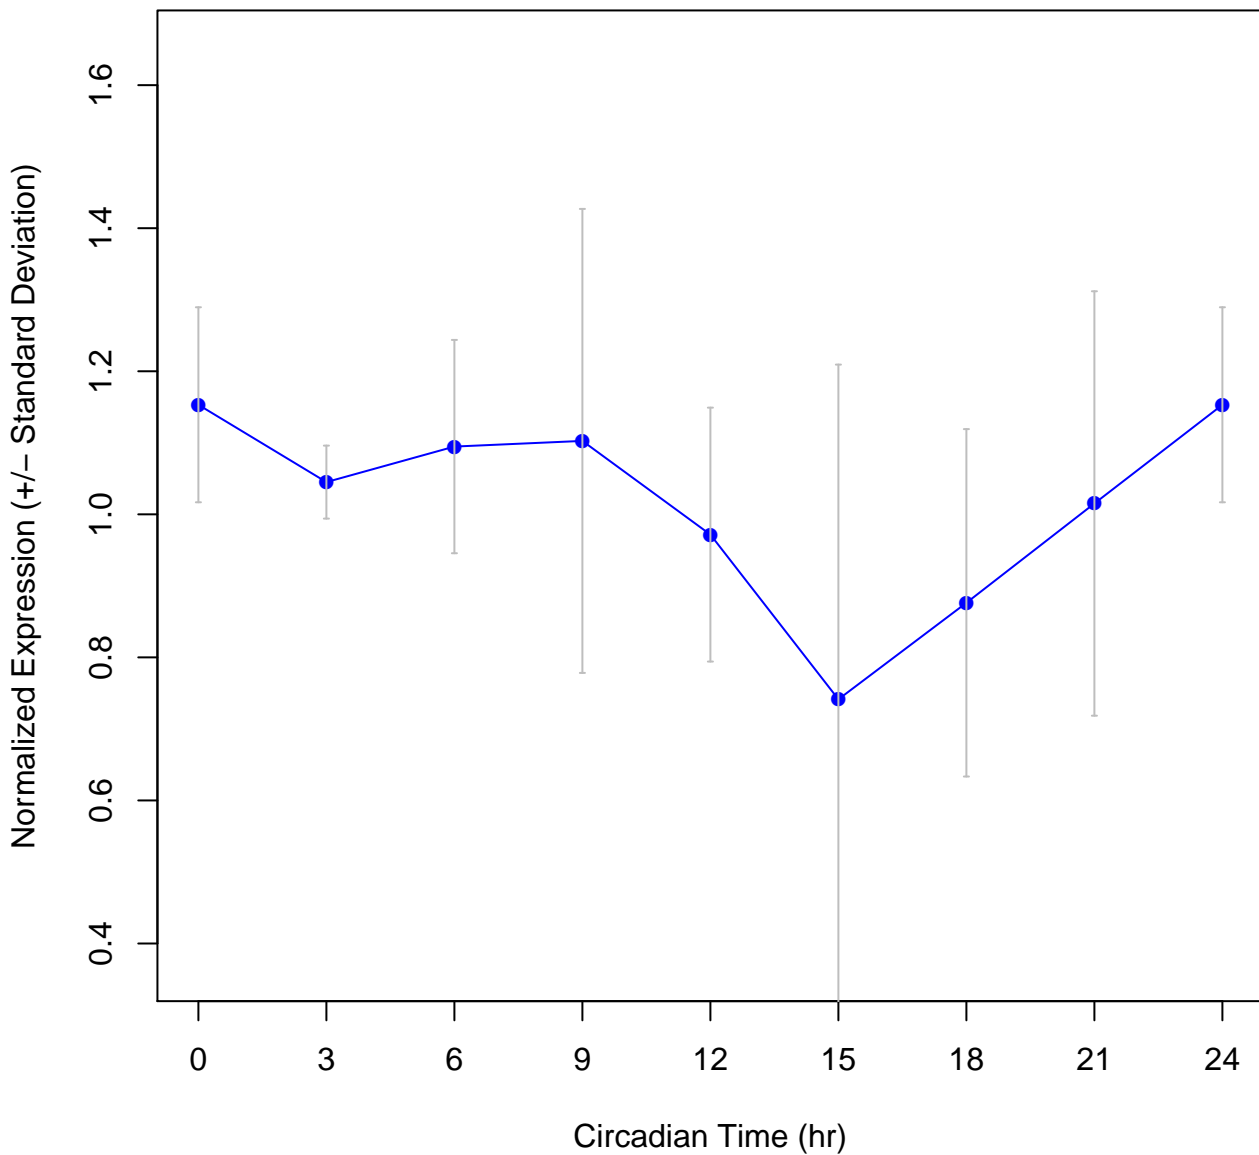

Supplement Figure 4 *gadd45aa*

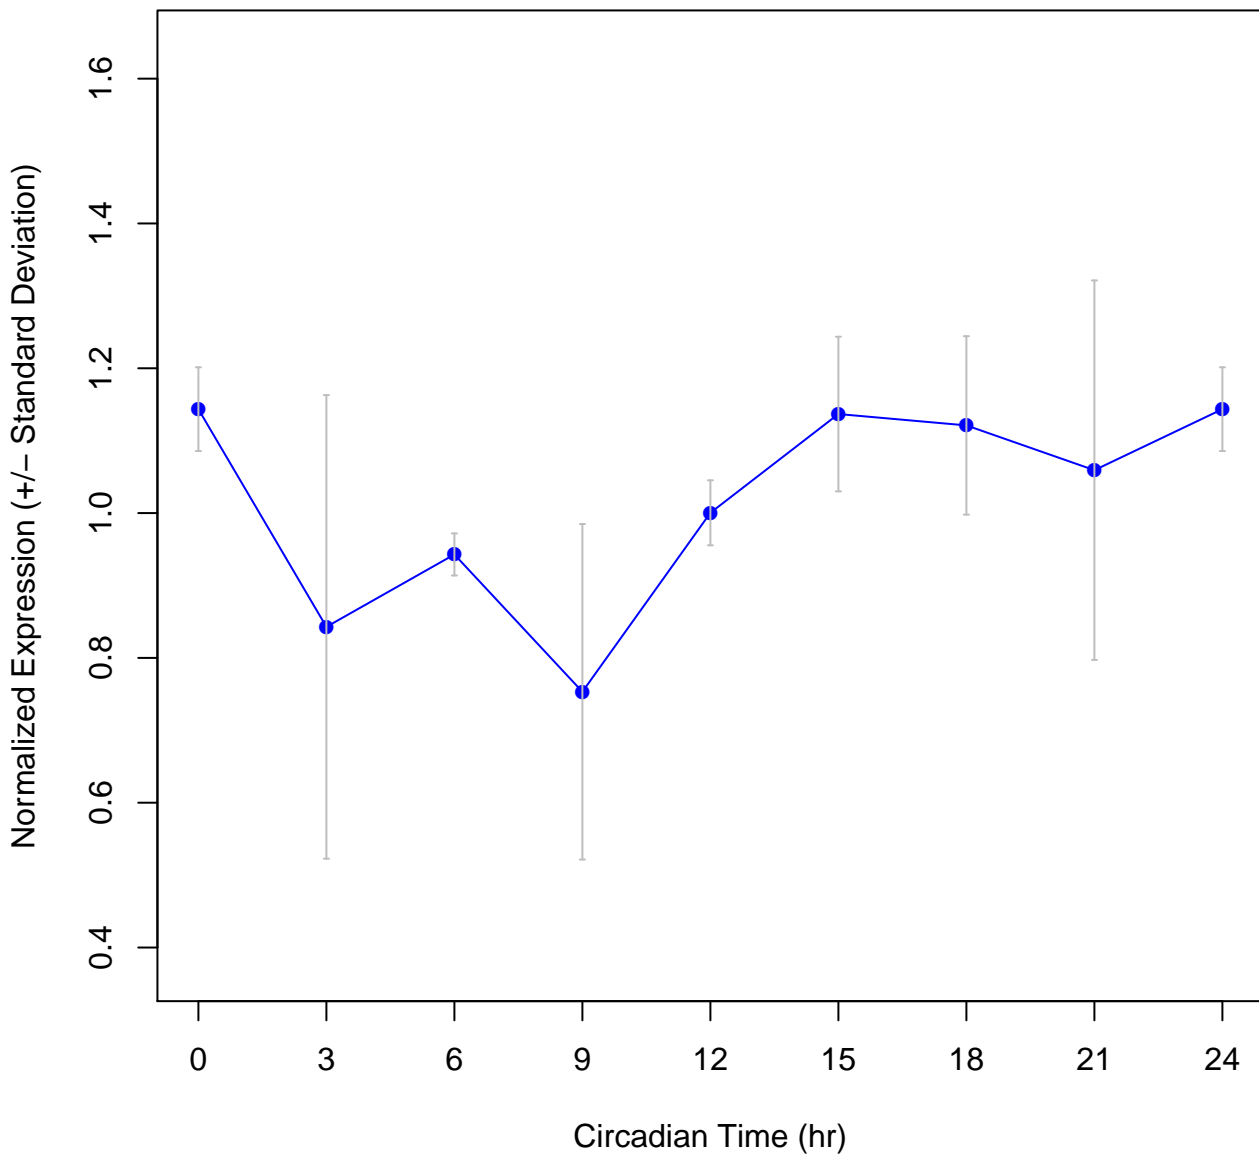

Supplement Figure 4 gadd45ab

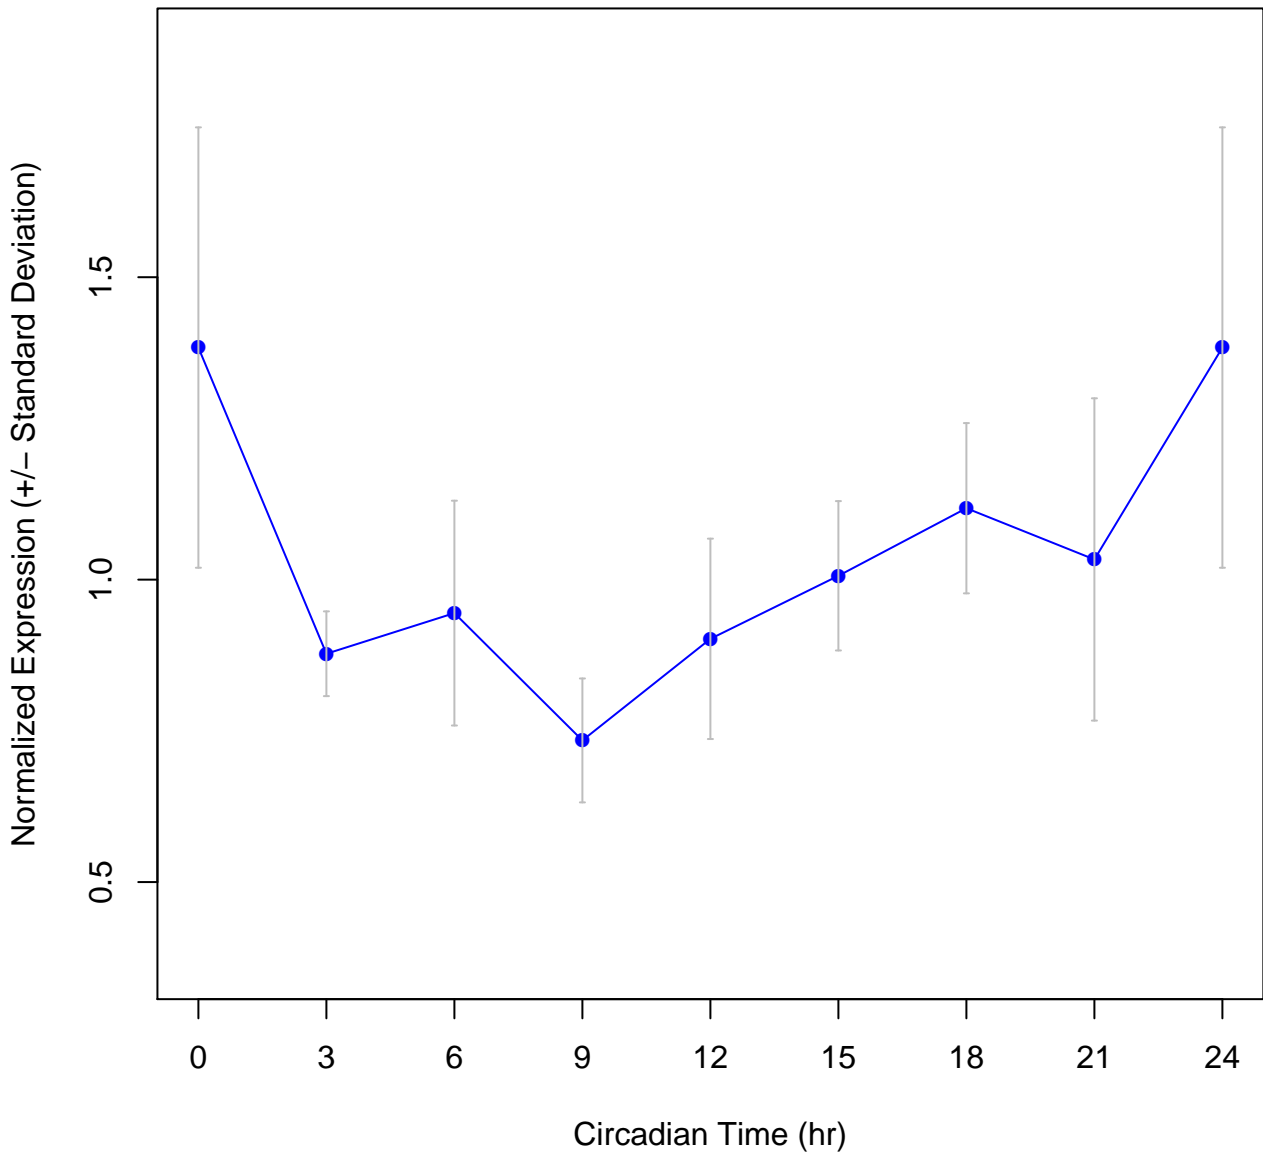

Supplement Figure 4 *gadd45b*

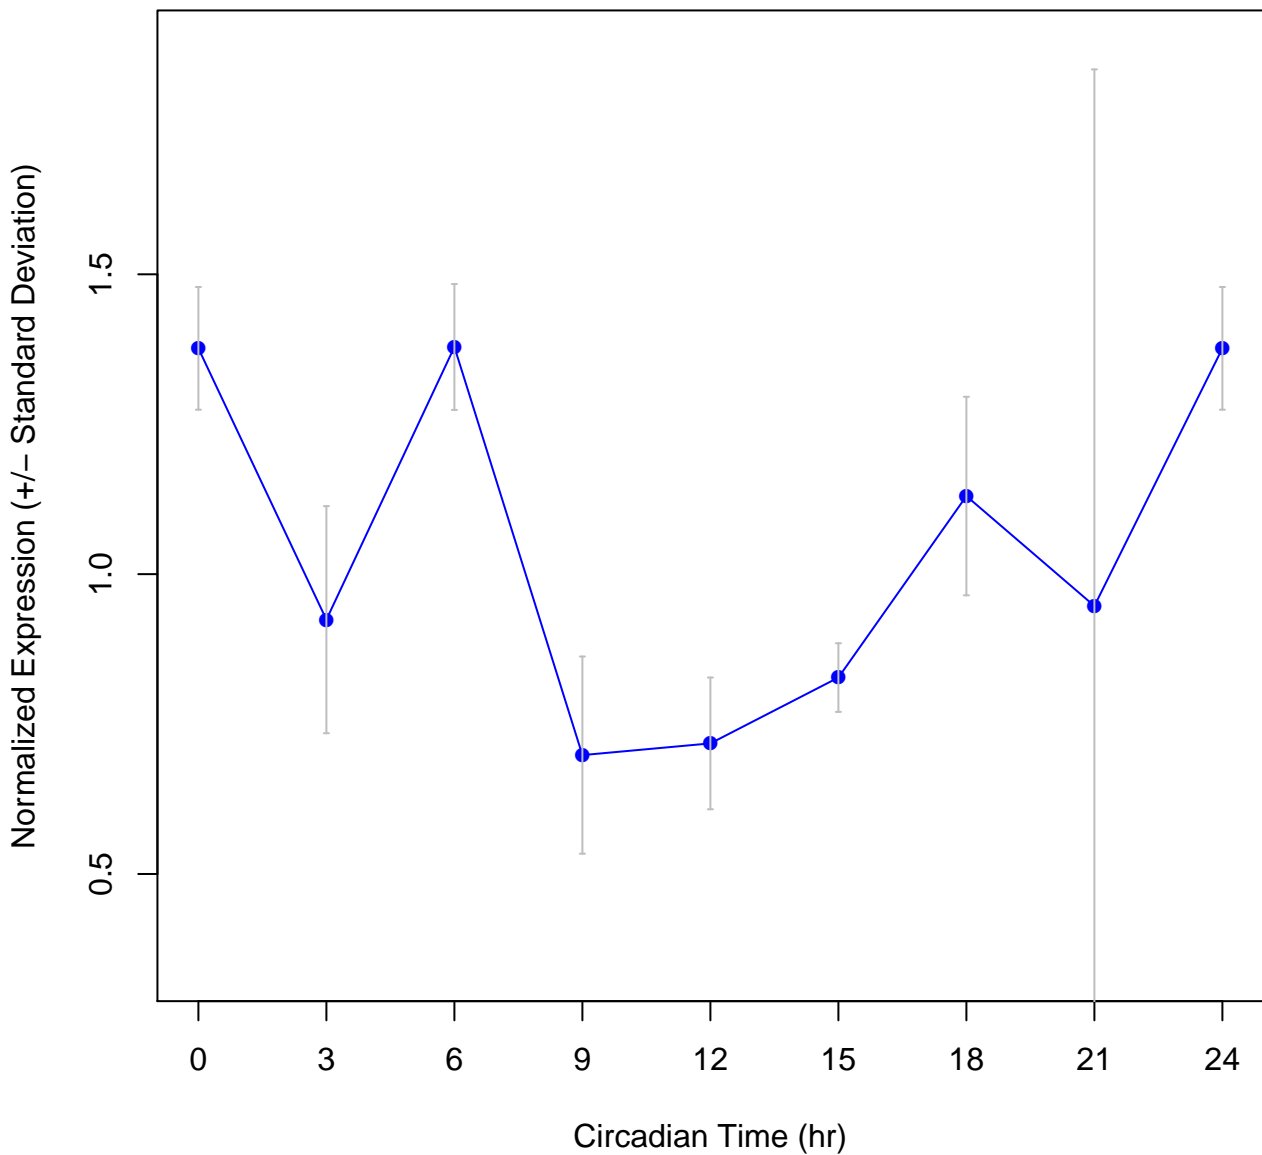

Supplement Figure 4 *gna15*

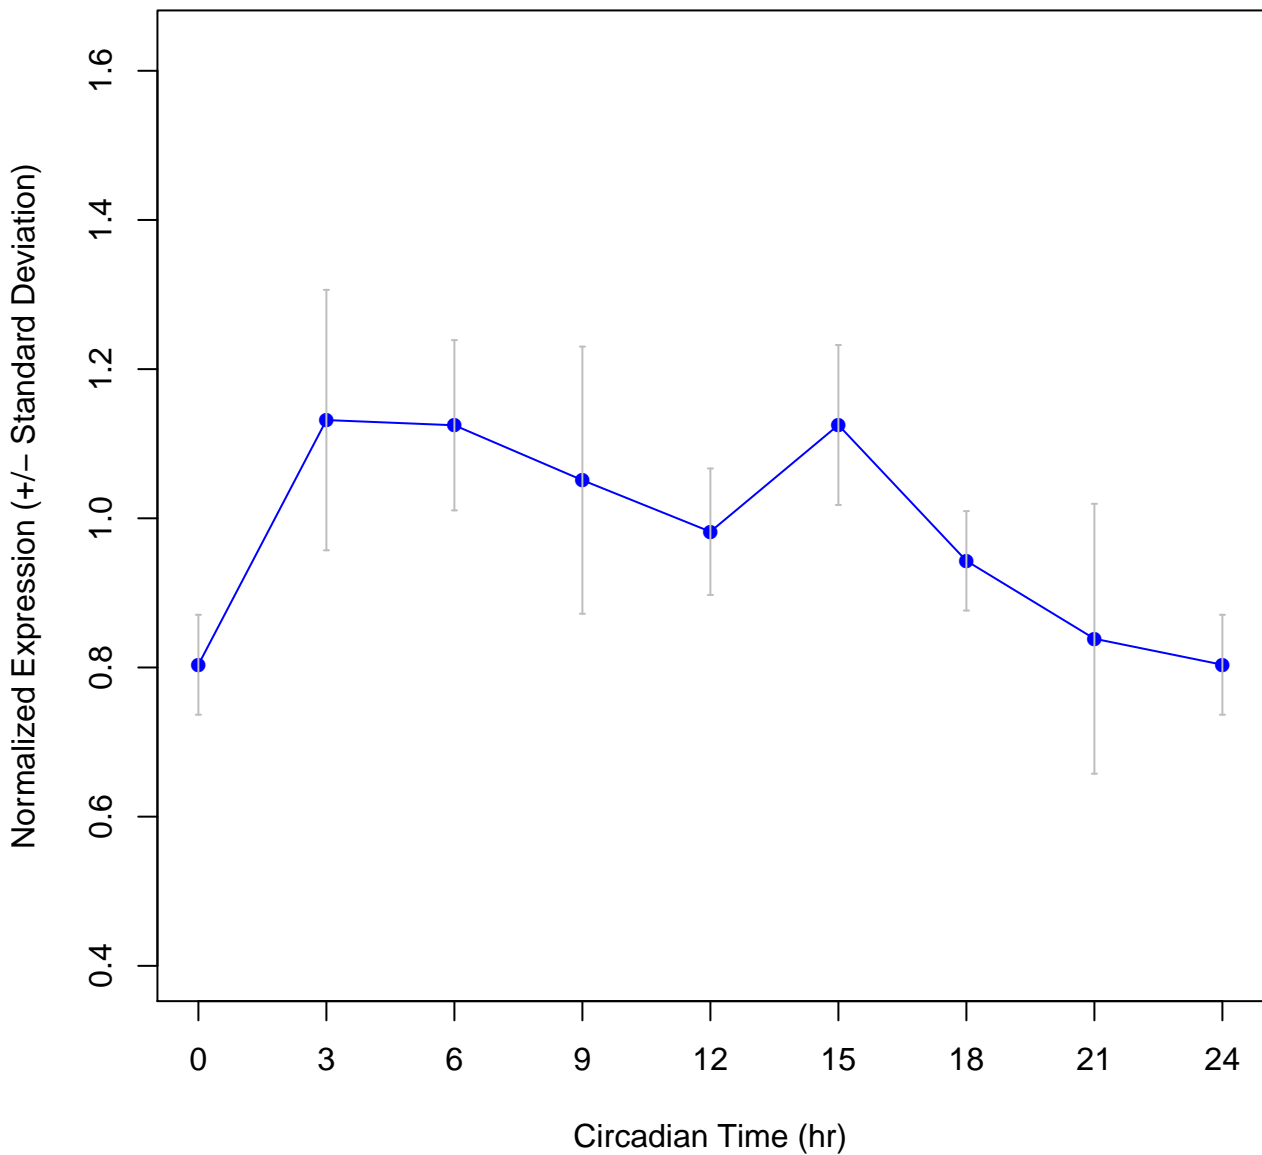

**Supplement Figure 4 grin1**

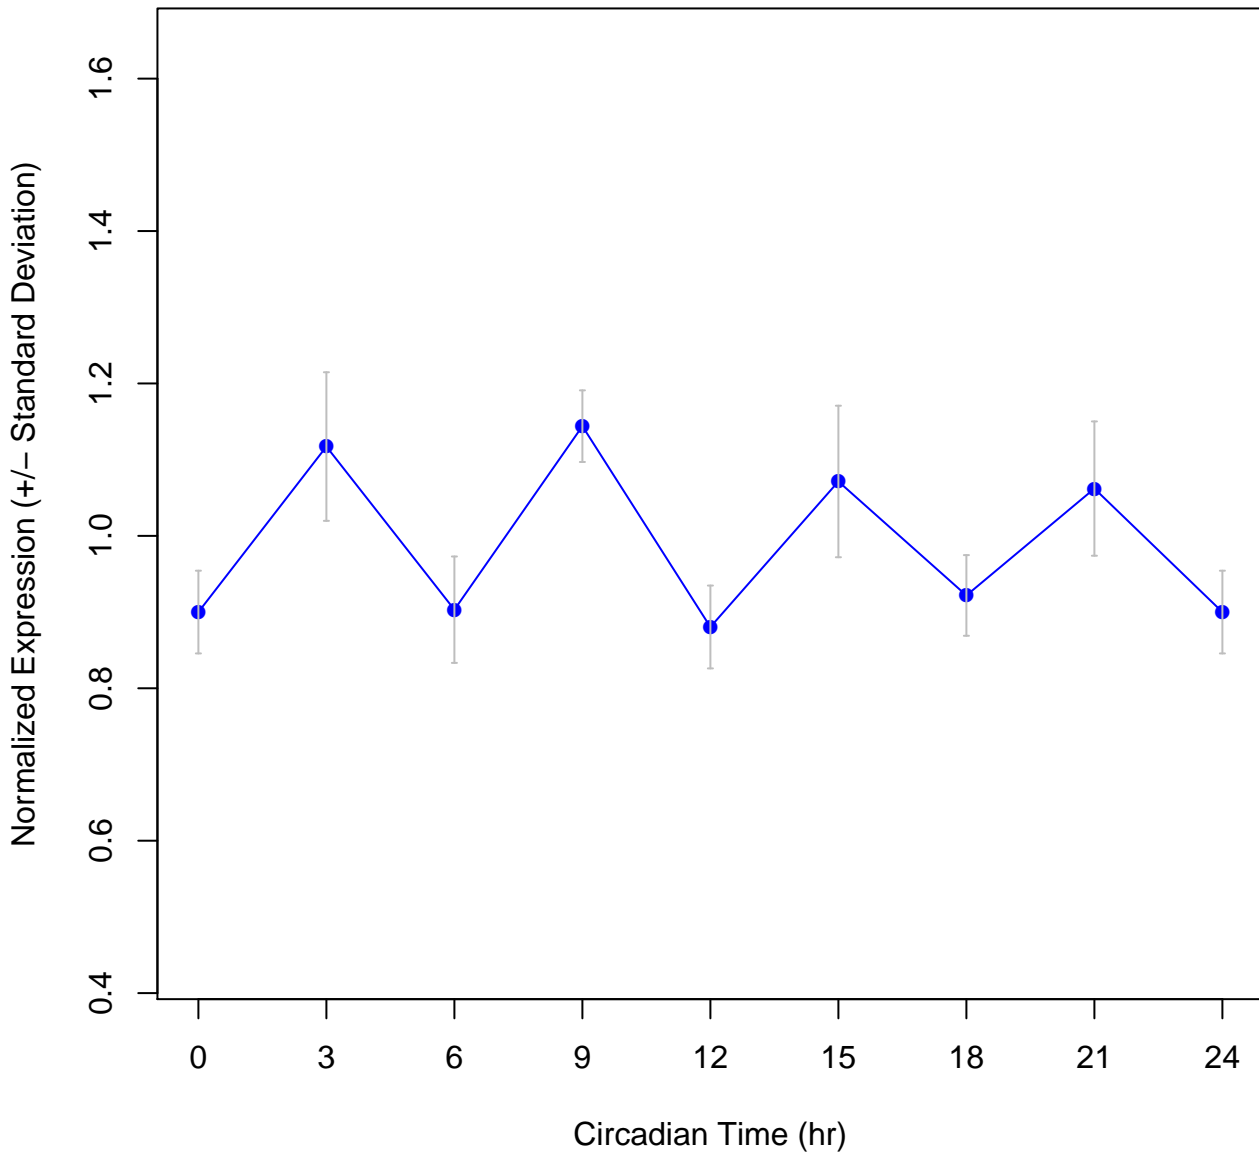

Supplement Figure 4 grin2a

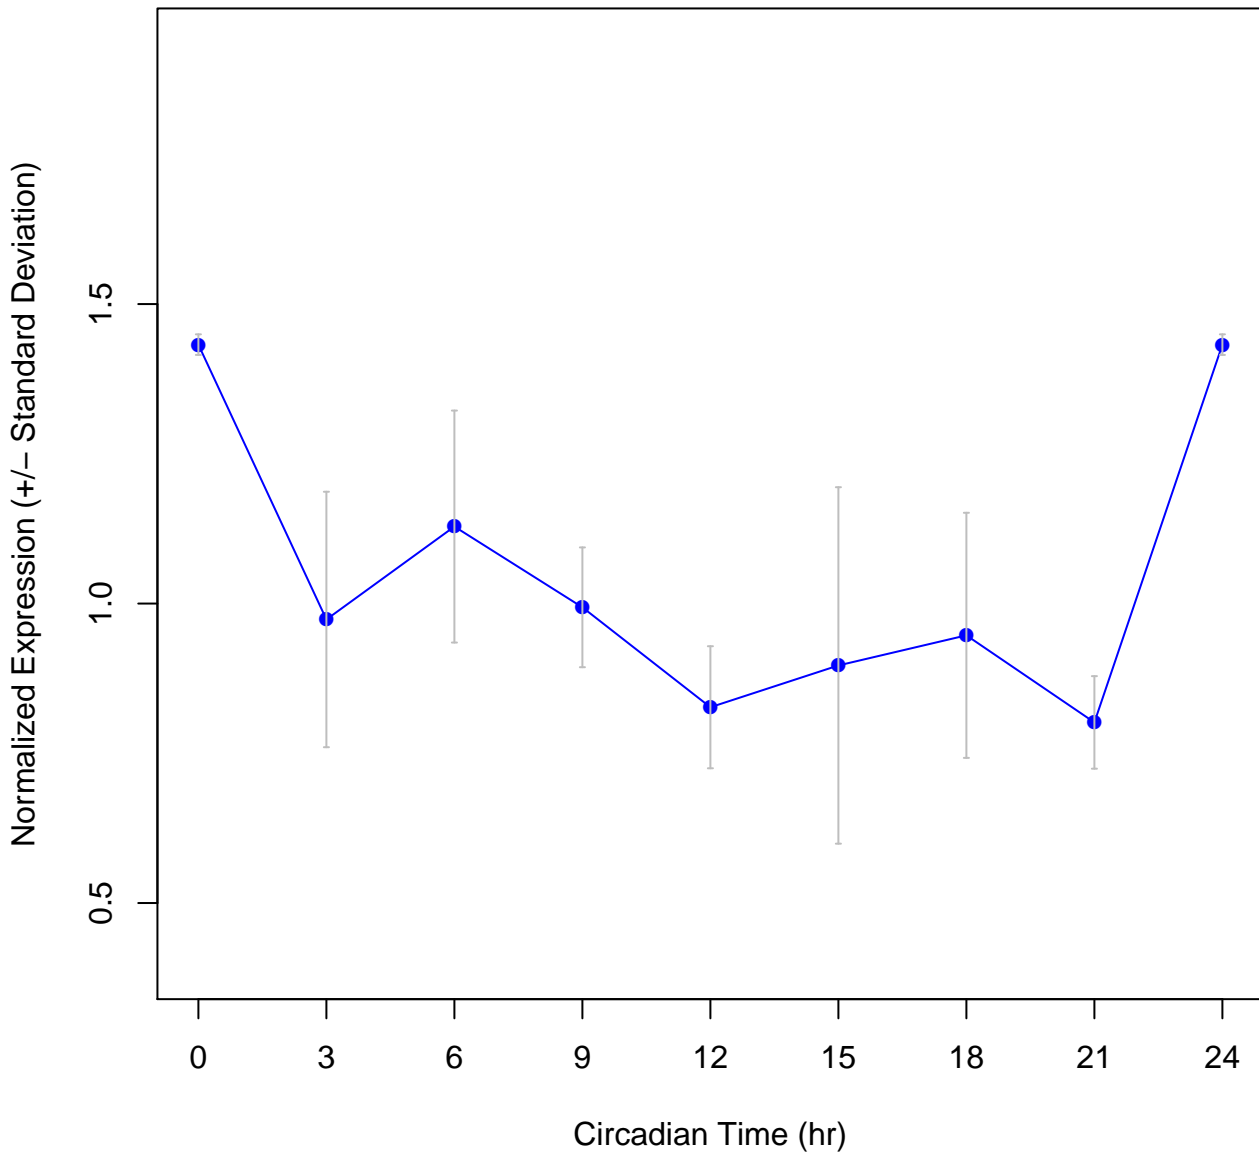

**Supplement Figure 4 hdac3**

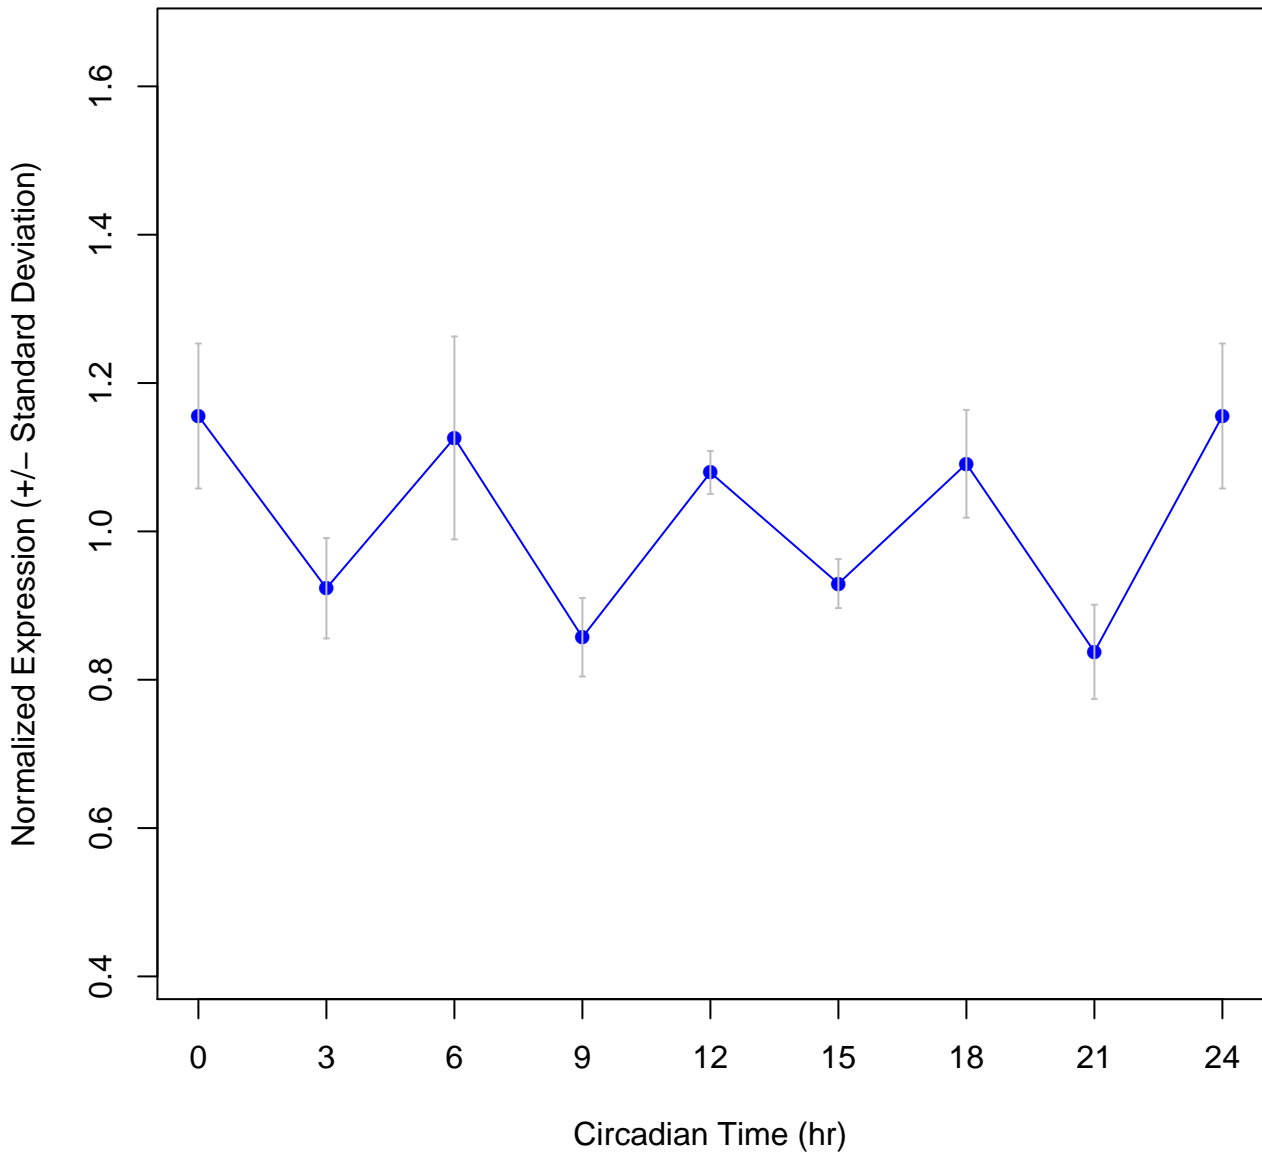



Supplement Figure 4 hmox1

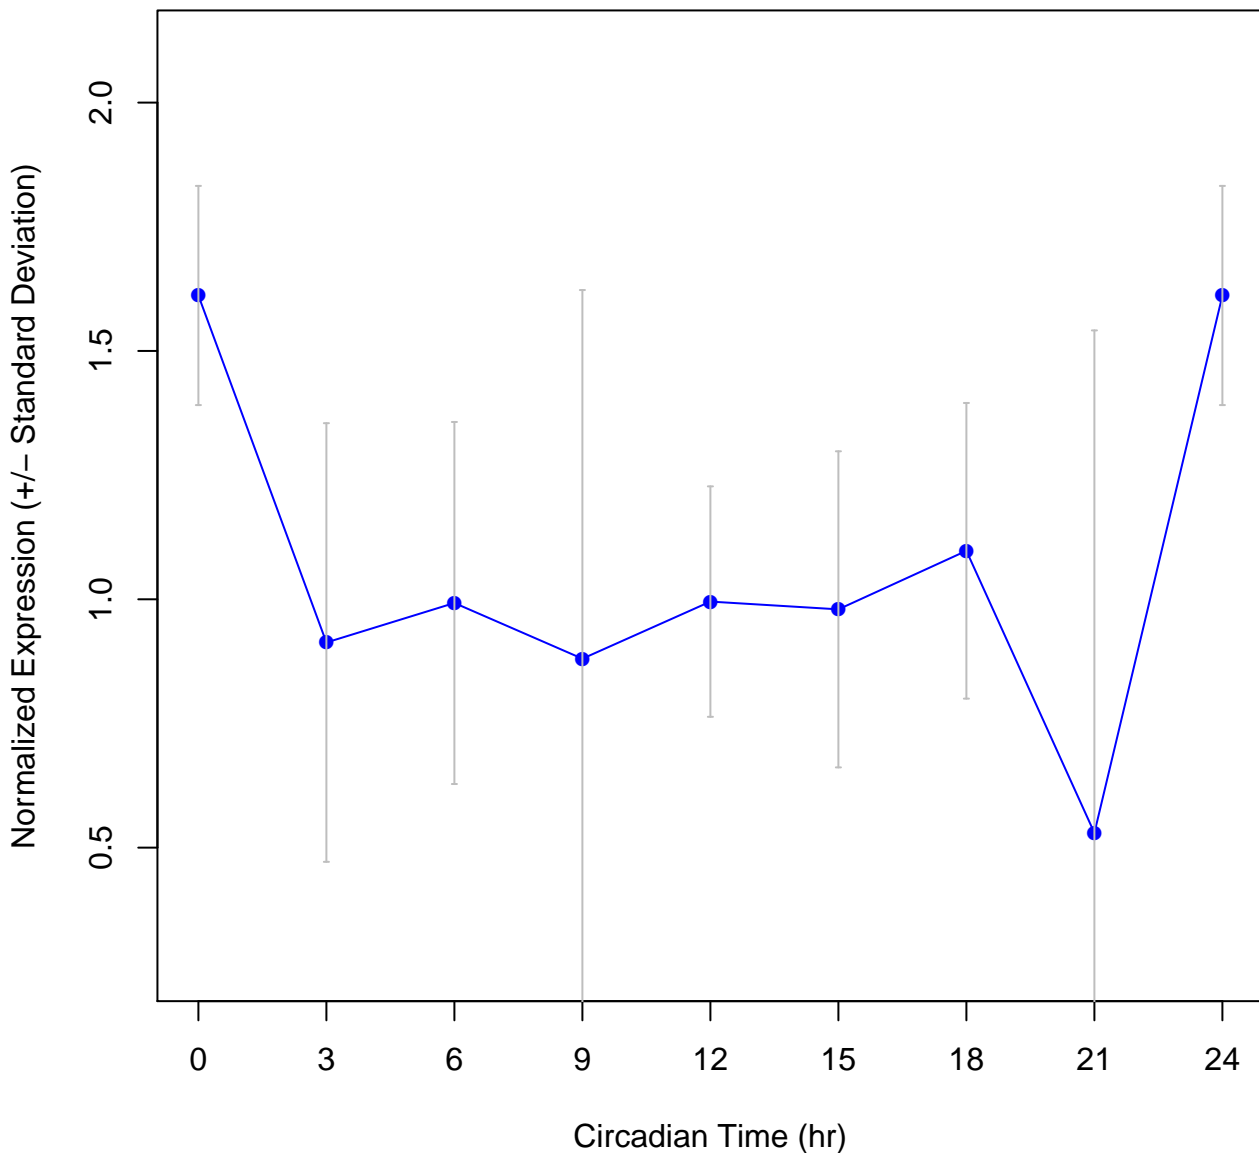

Supplement Figure 4 hp

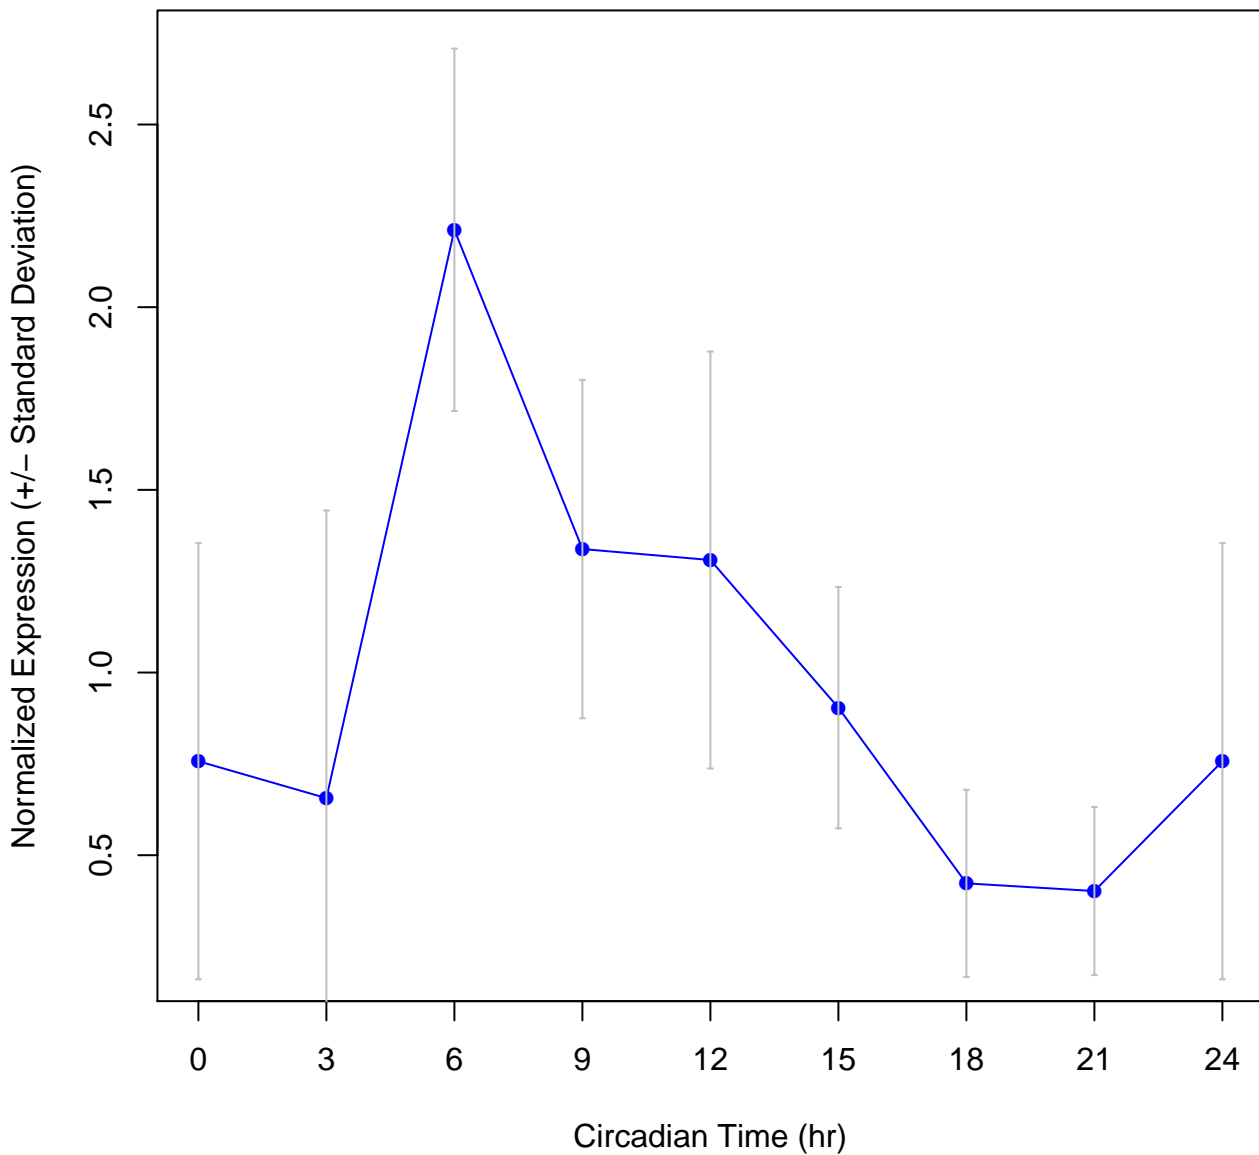

**Supplement Figure 4 hsp90aa1**

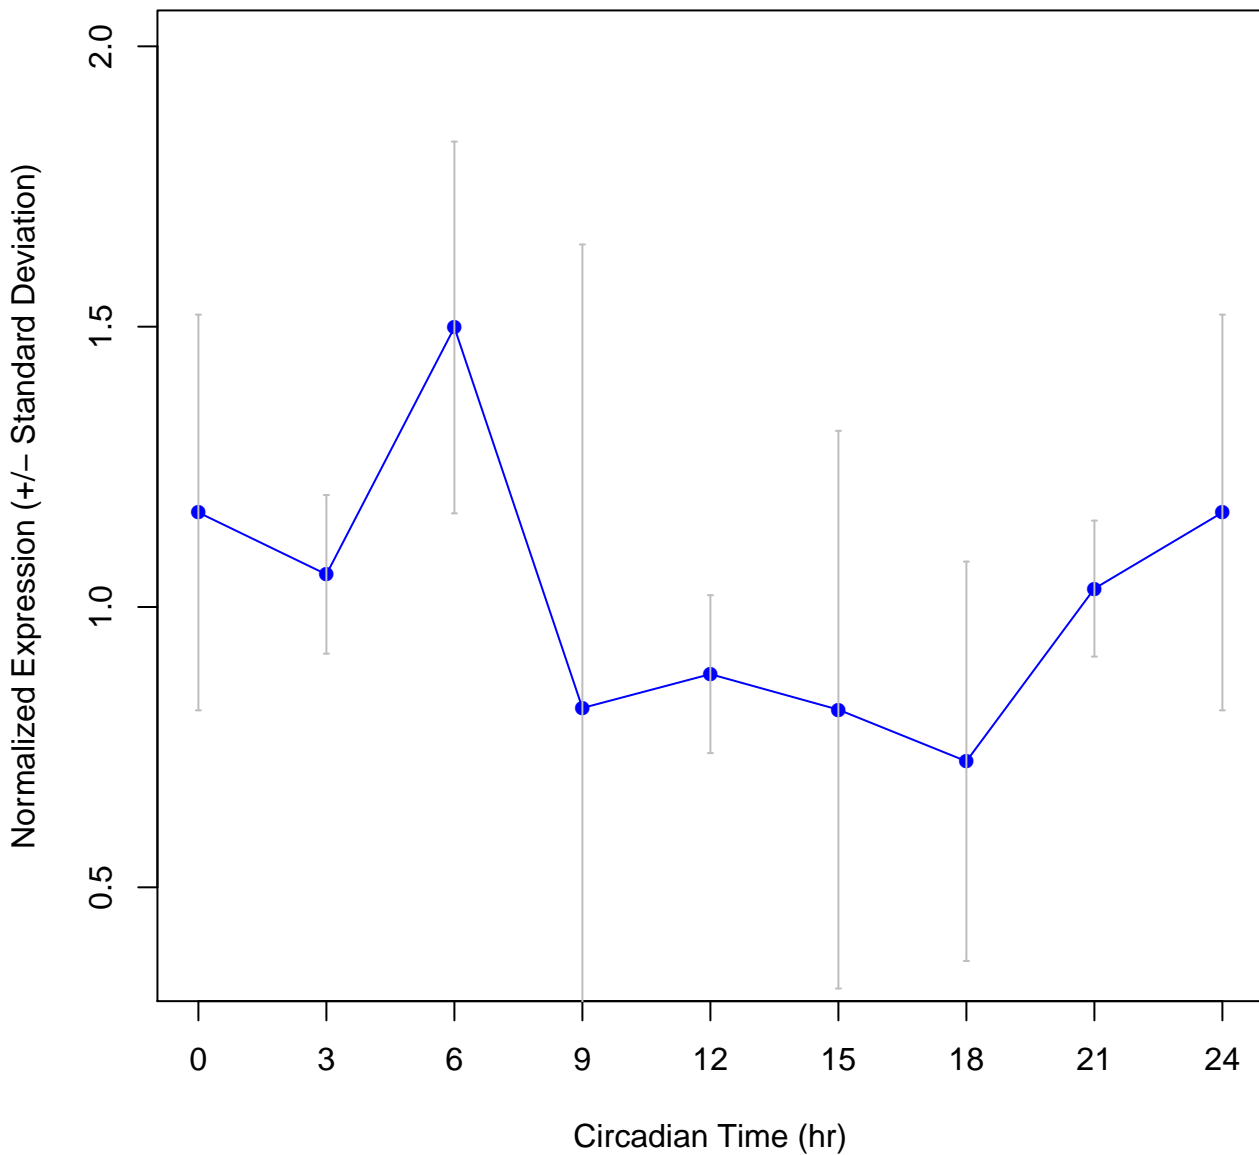

## Supplement Figure 4 hspa4

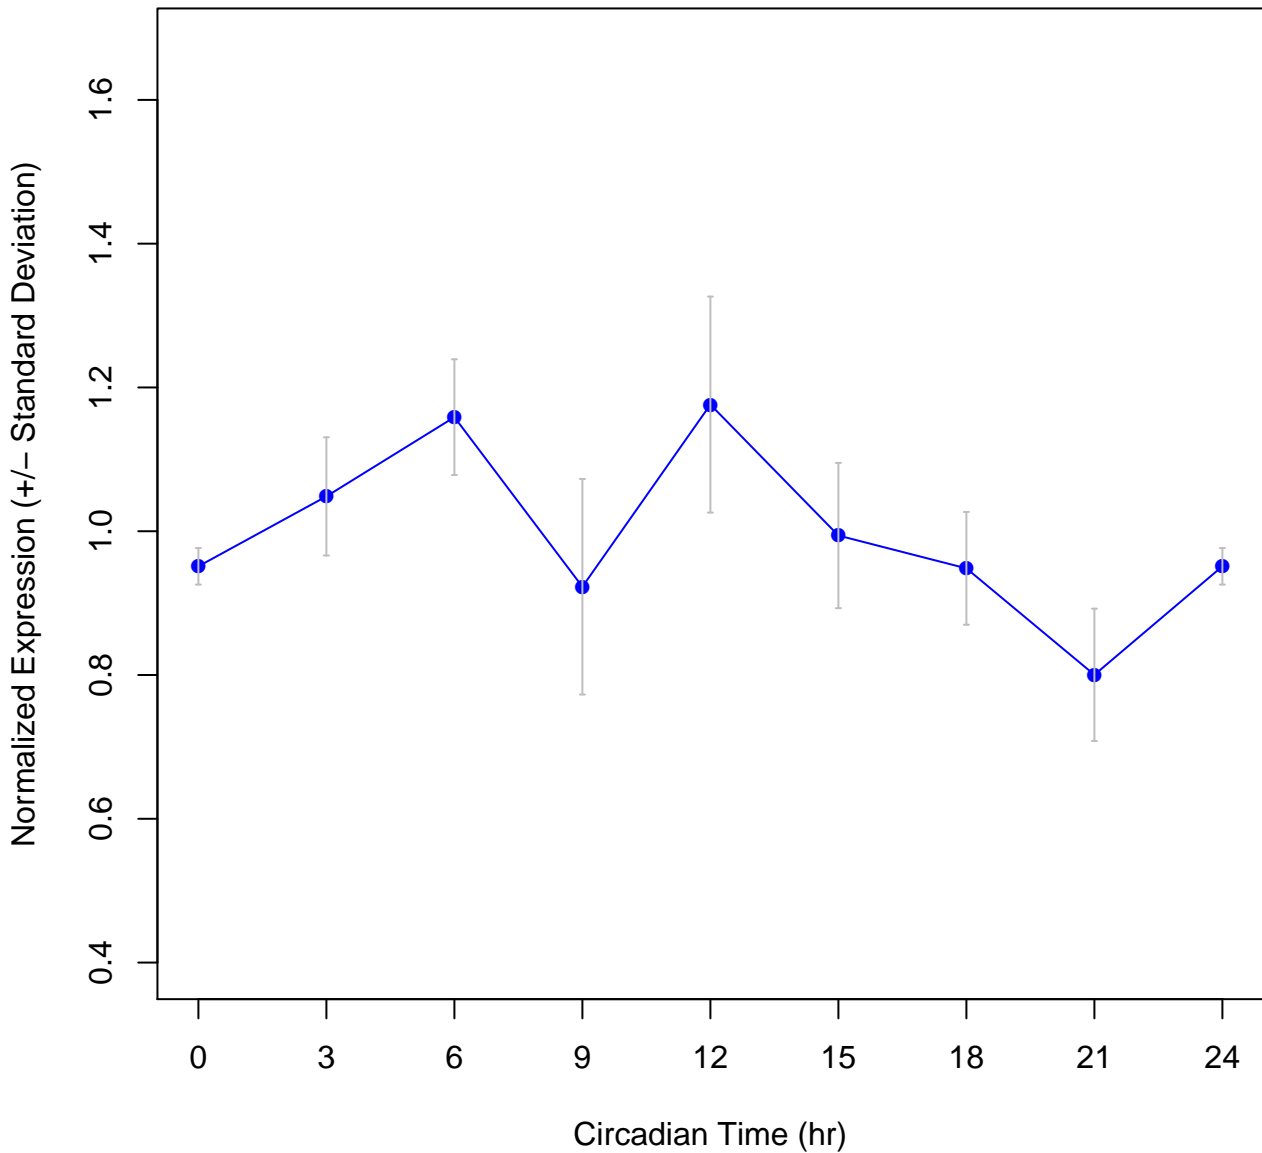

Supplement Figure 4 hunk

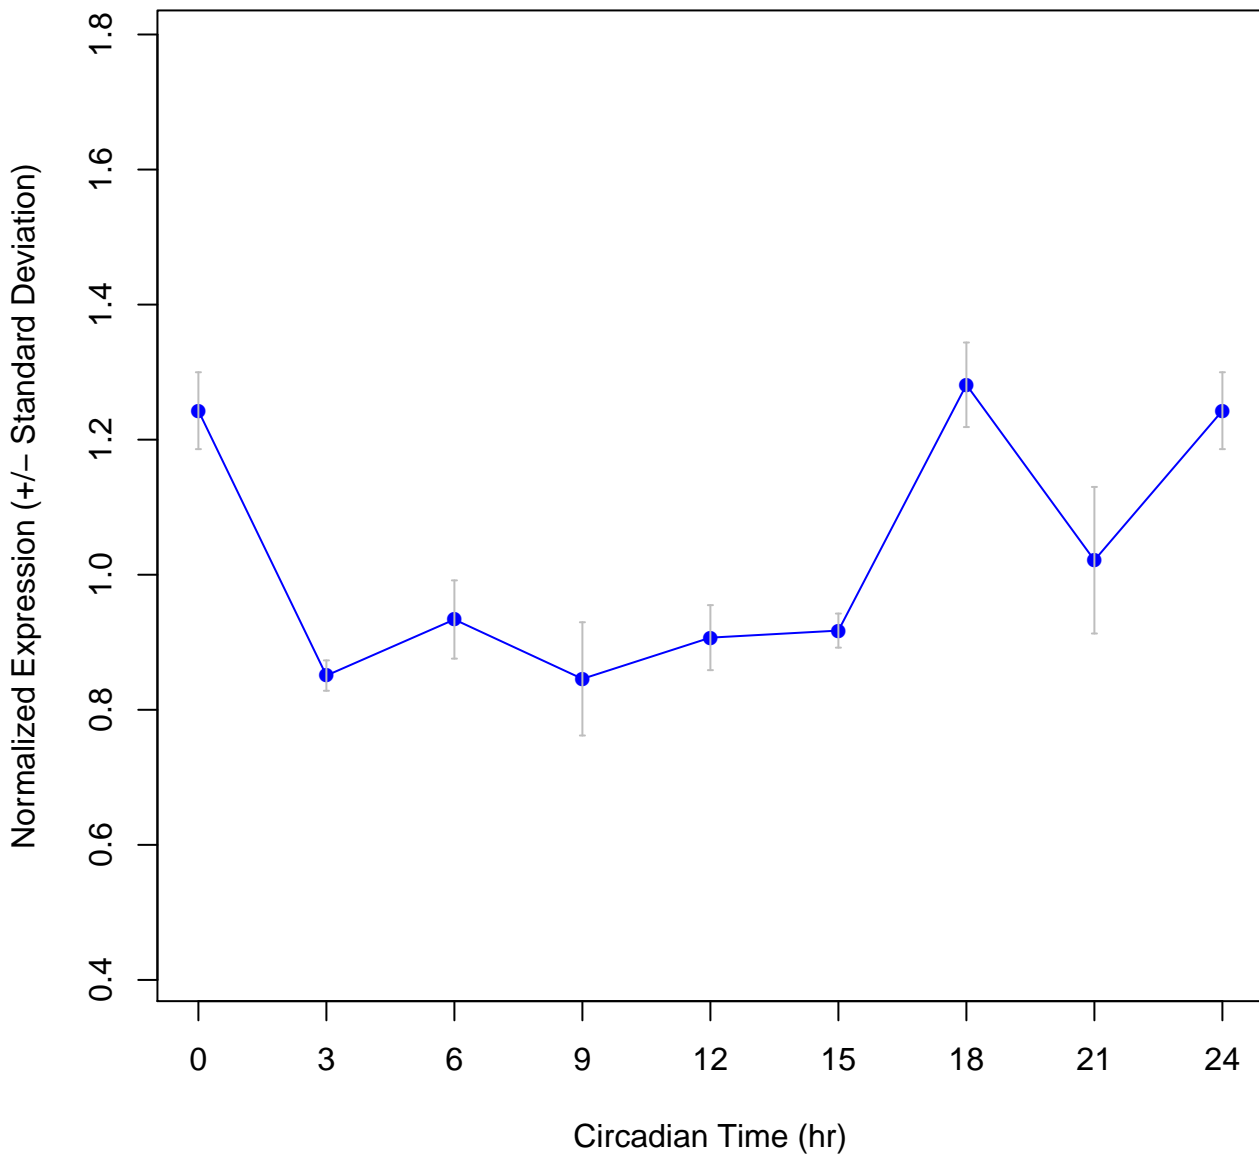

Supplement Figure 4 igf1

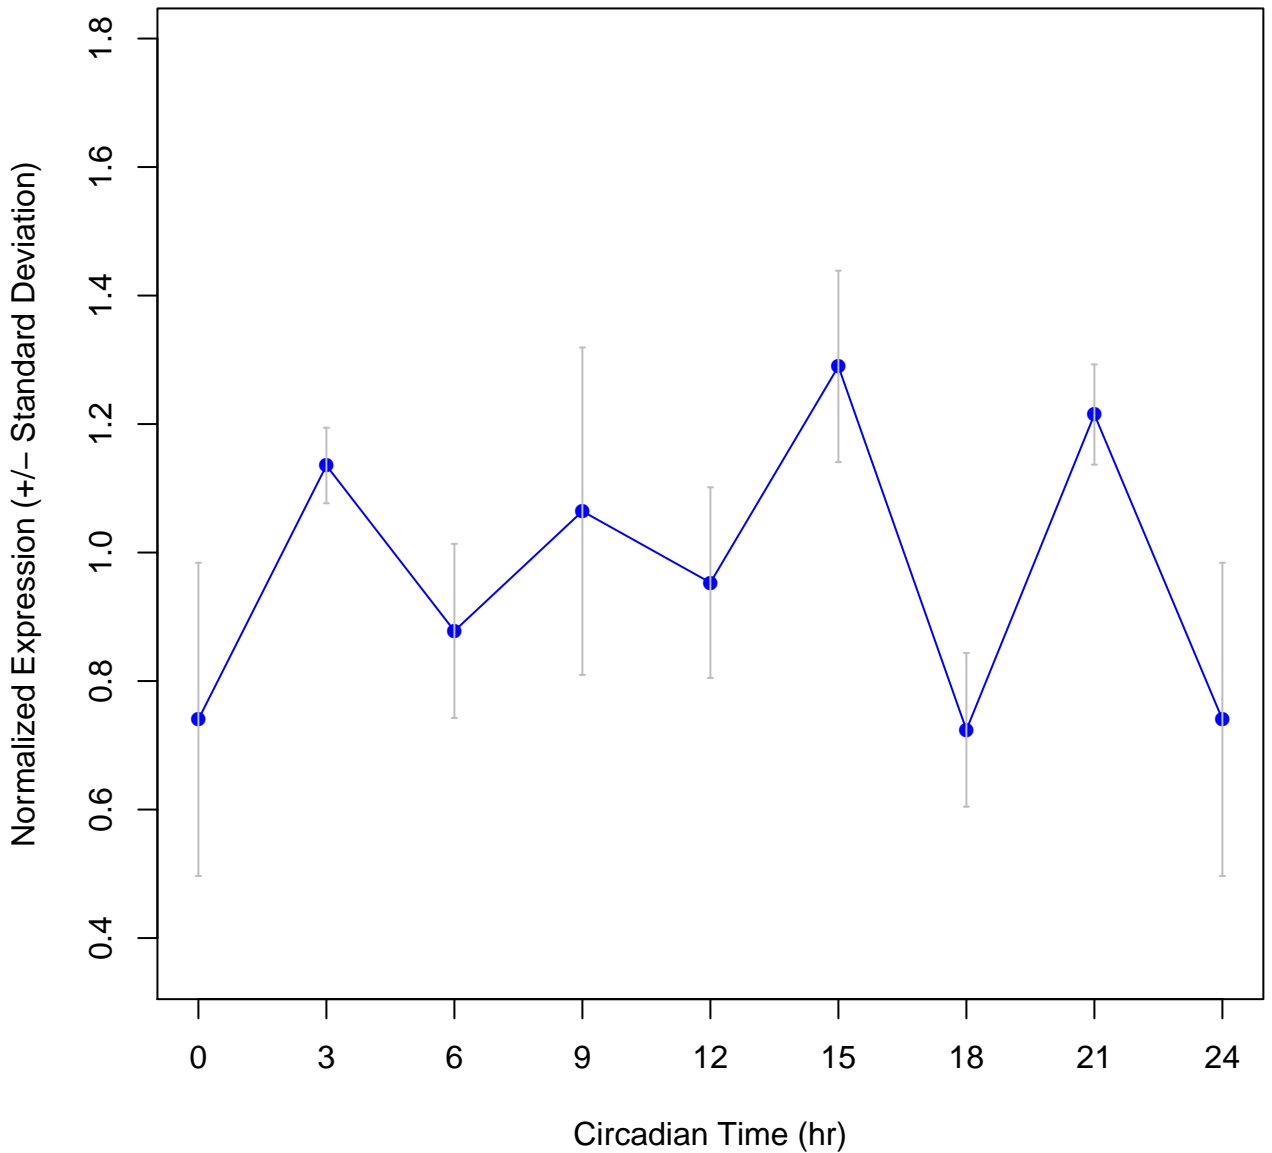

Supplement Figure 4 ints9

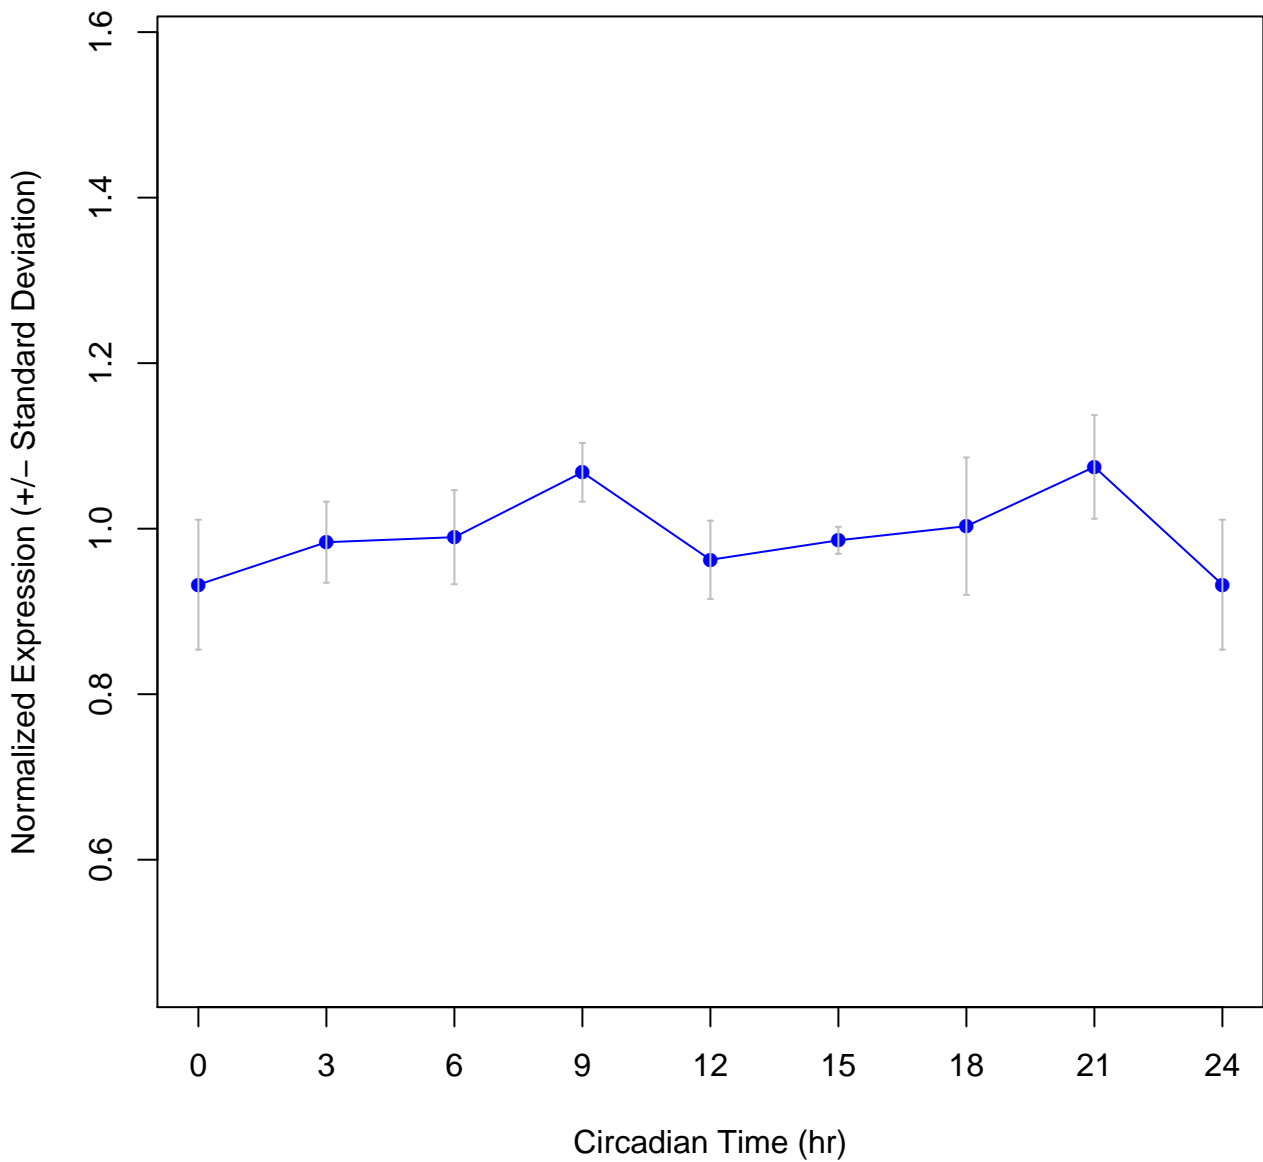

**Supplement Figure 4 *irs1***

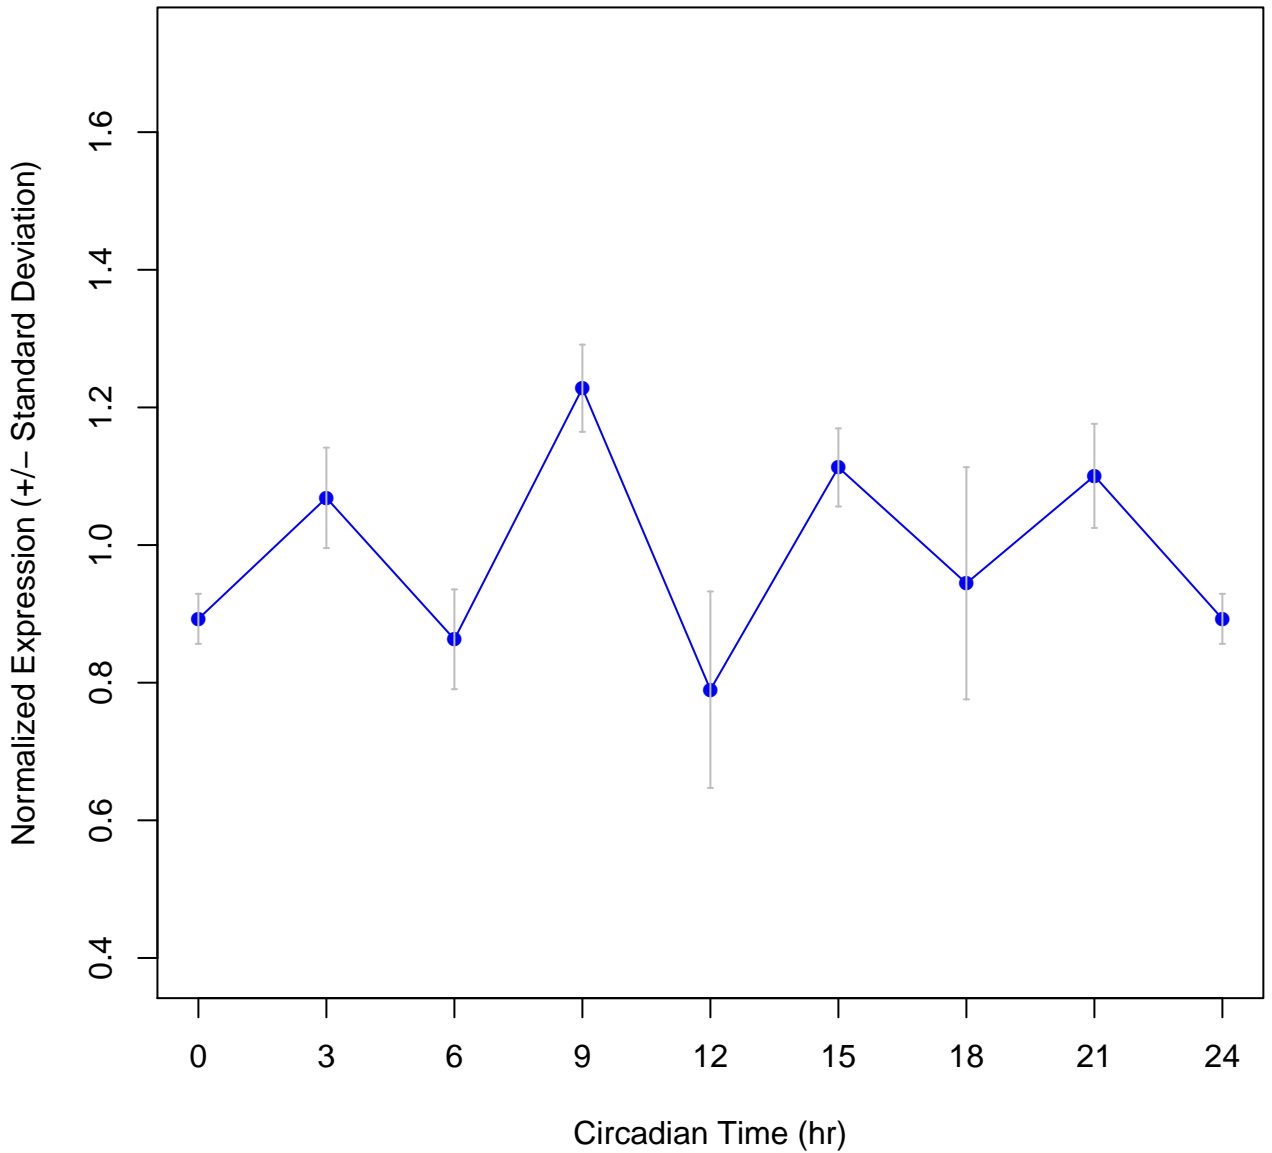



**Supplement Figure 4 *irs2***

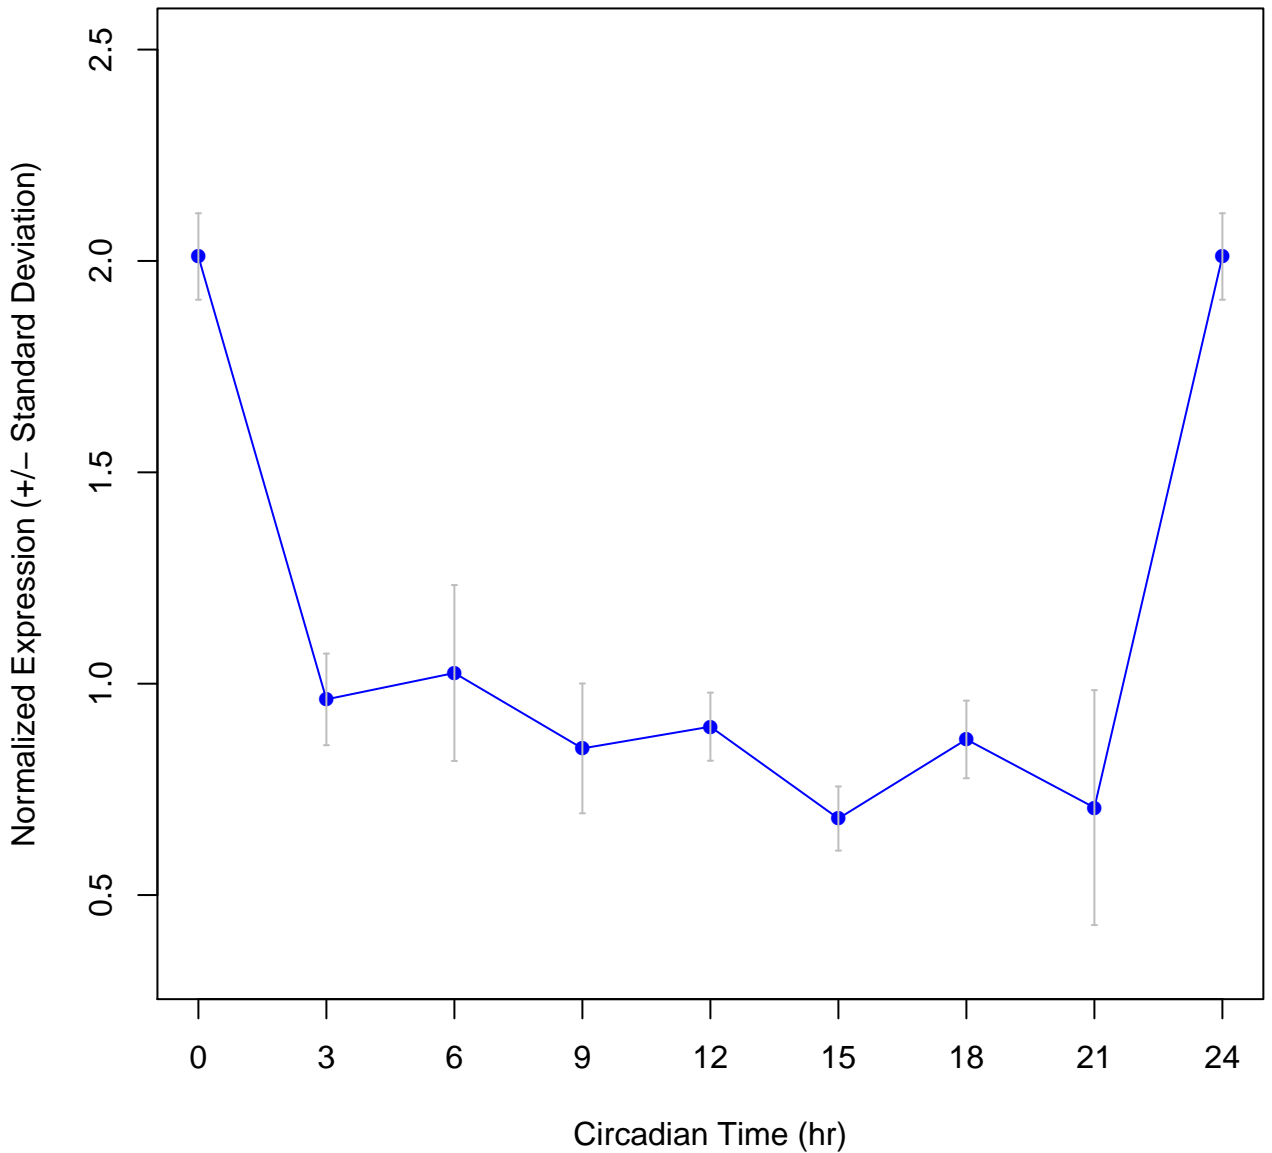

Supplement Figure 4 itpr1

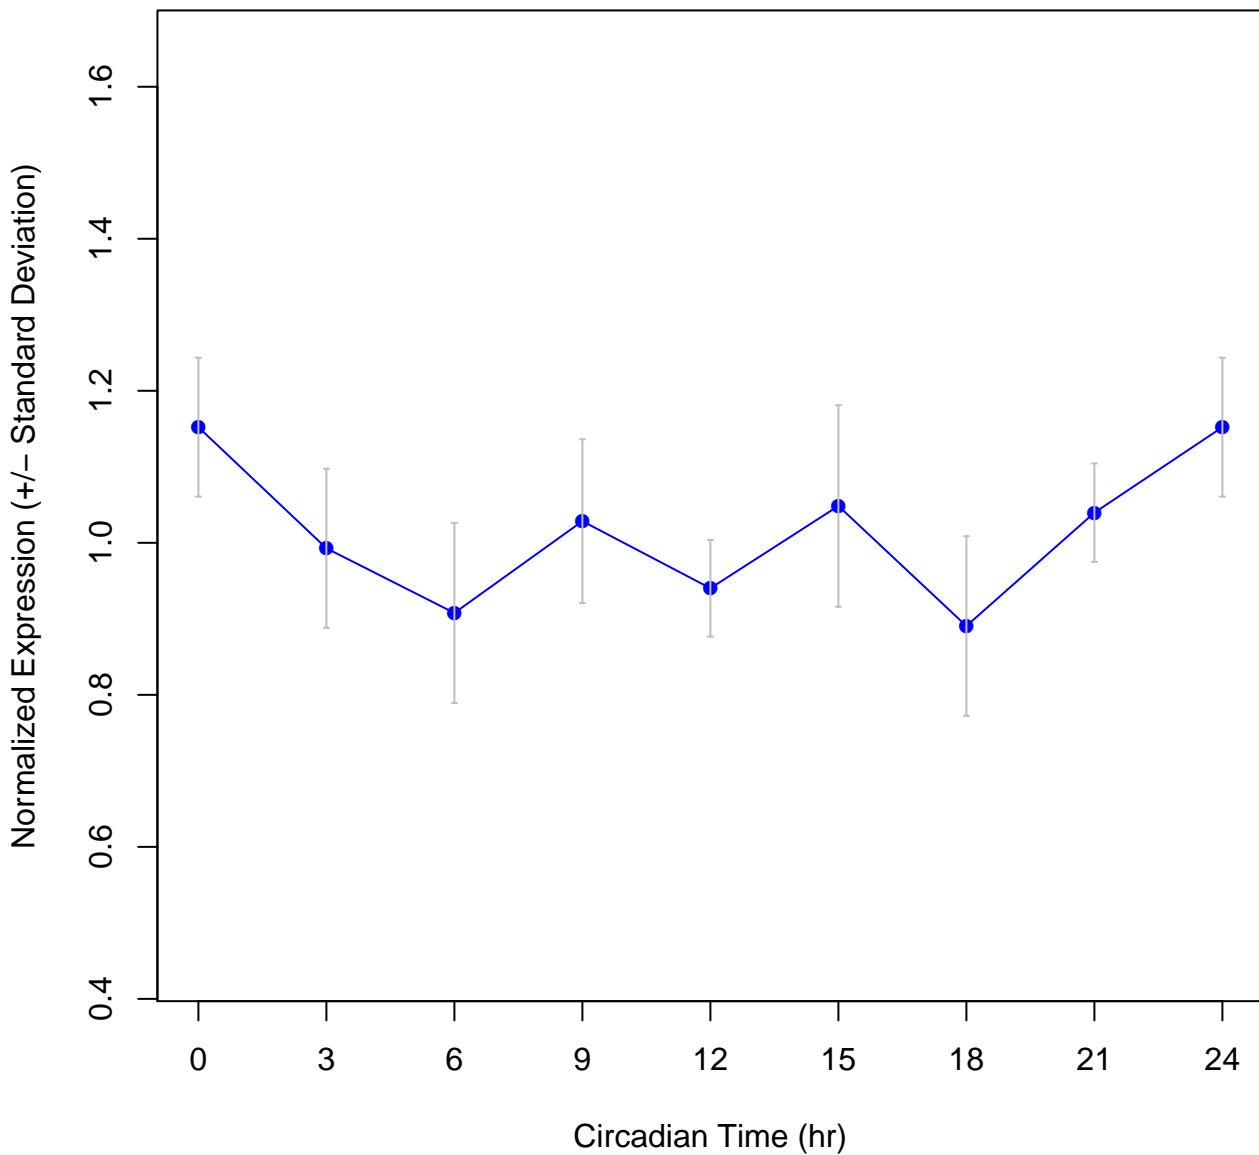

Supplement Figure 4 itpr3

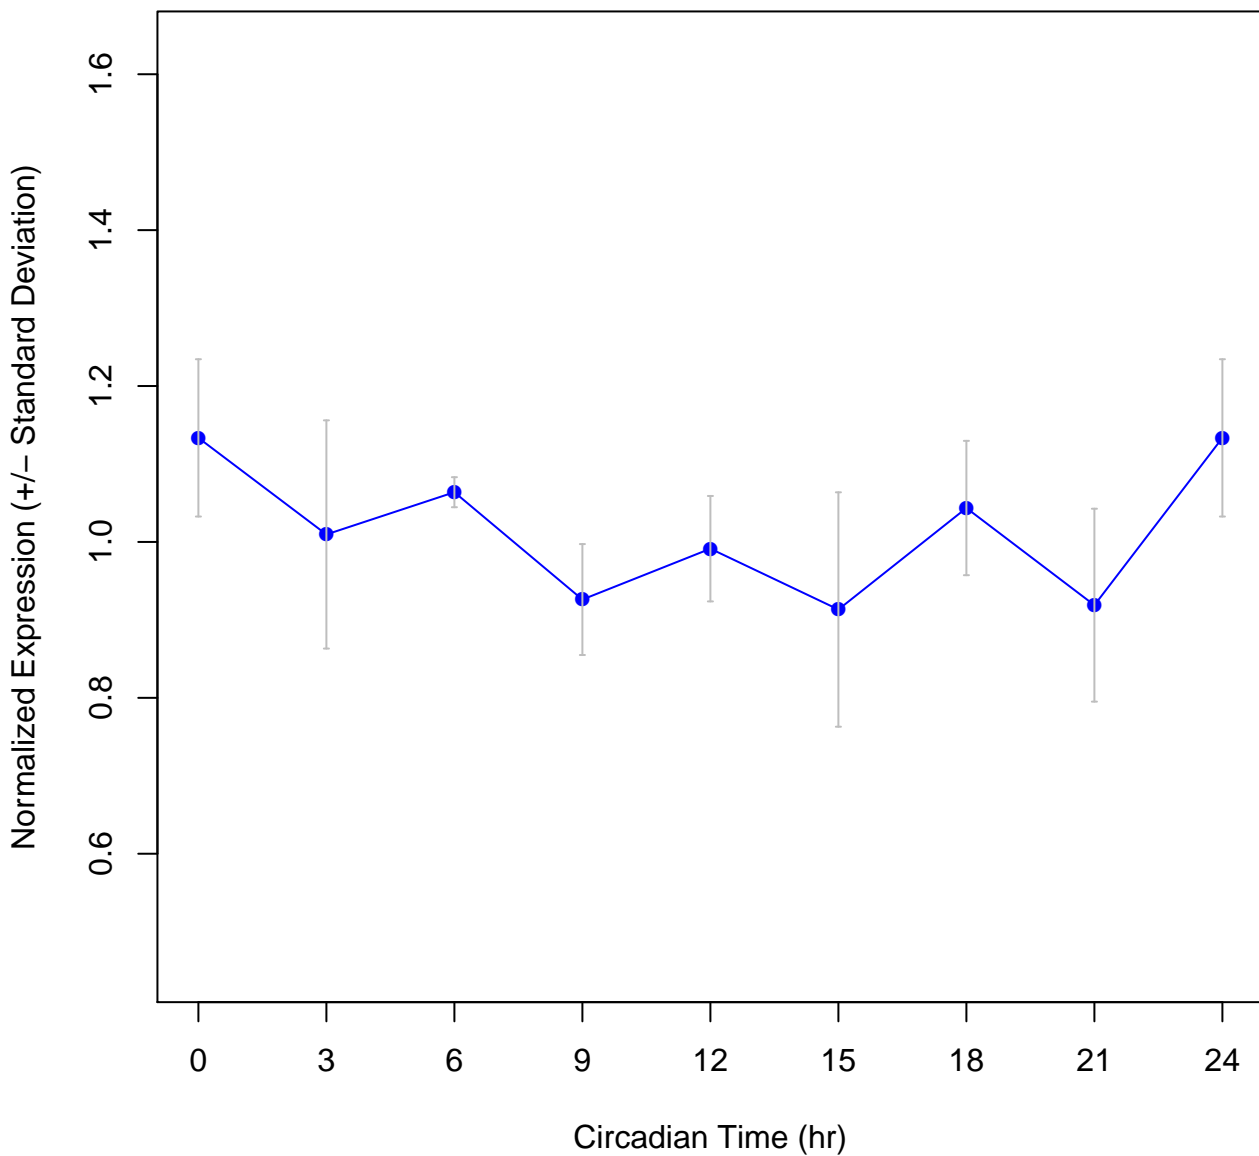

Supplement Figure 4 jun\_1

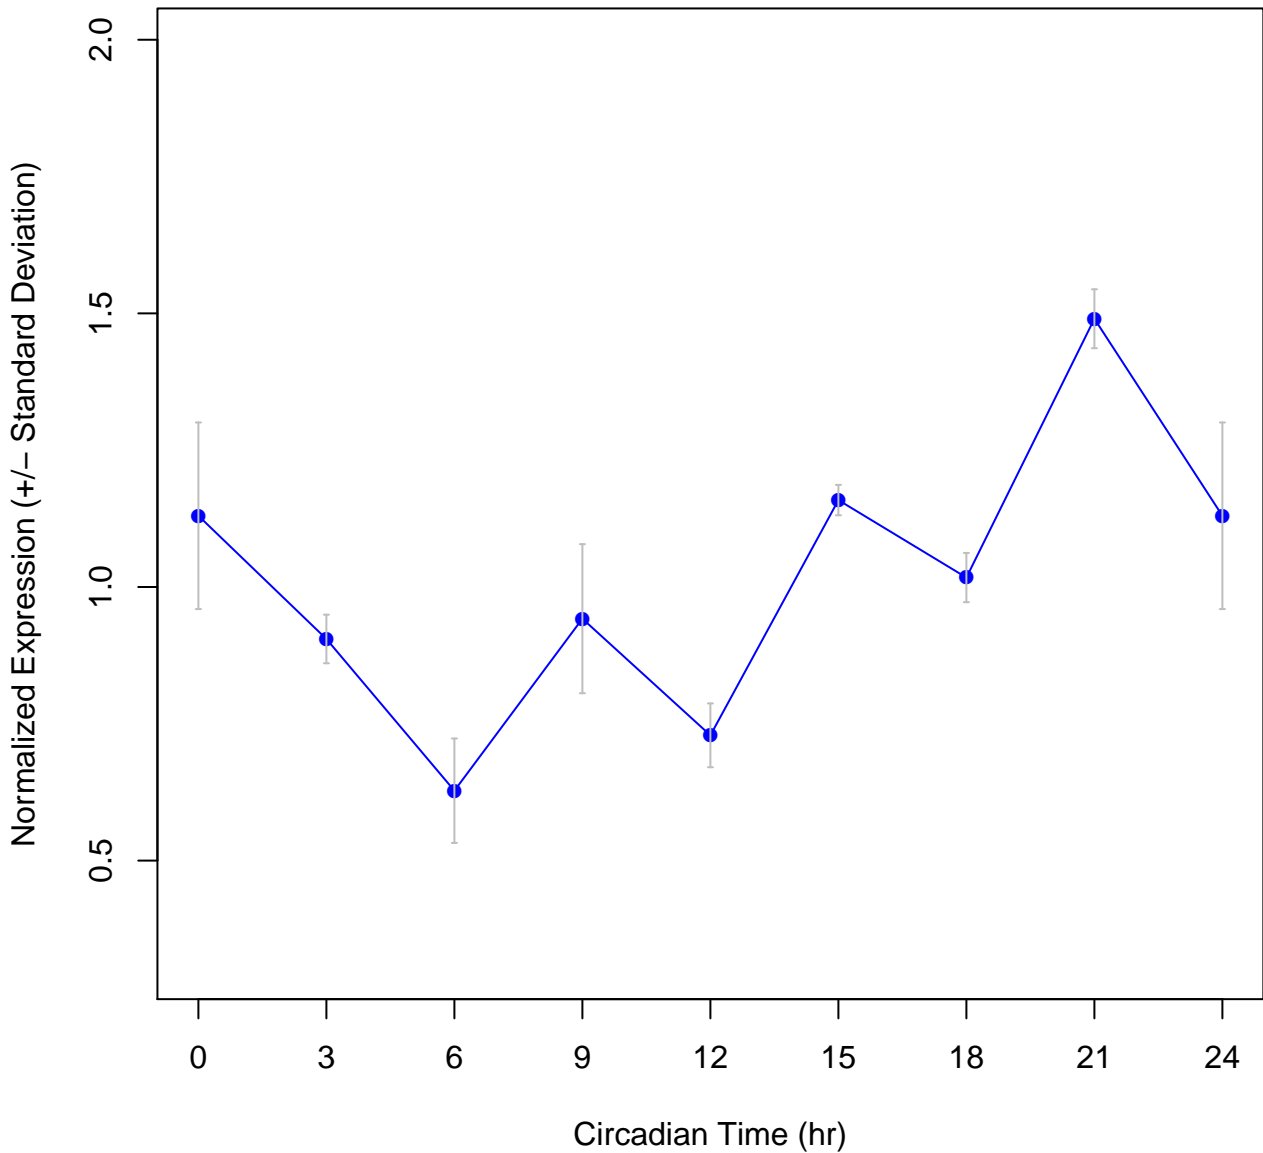

Supplement Figure 4 jun\_2

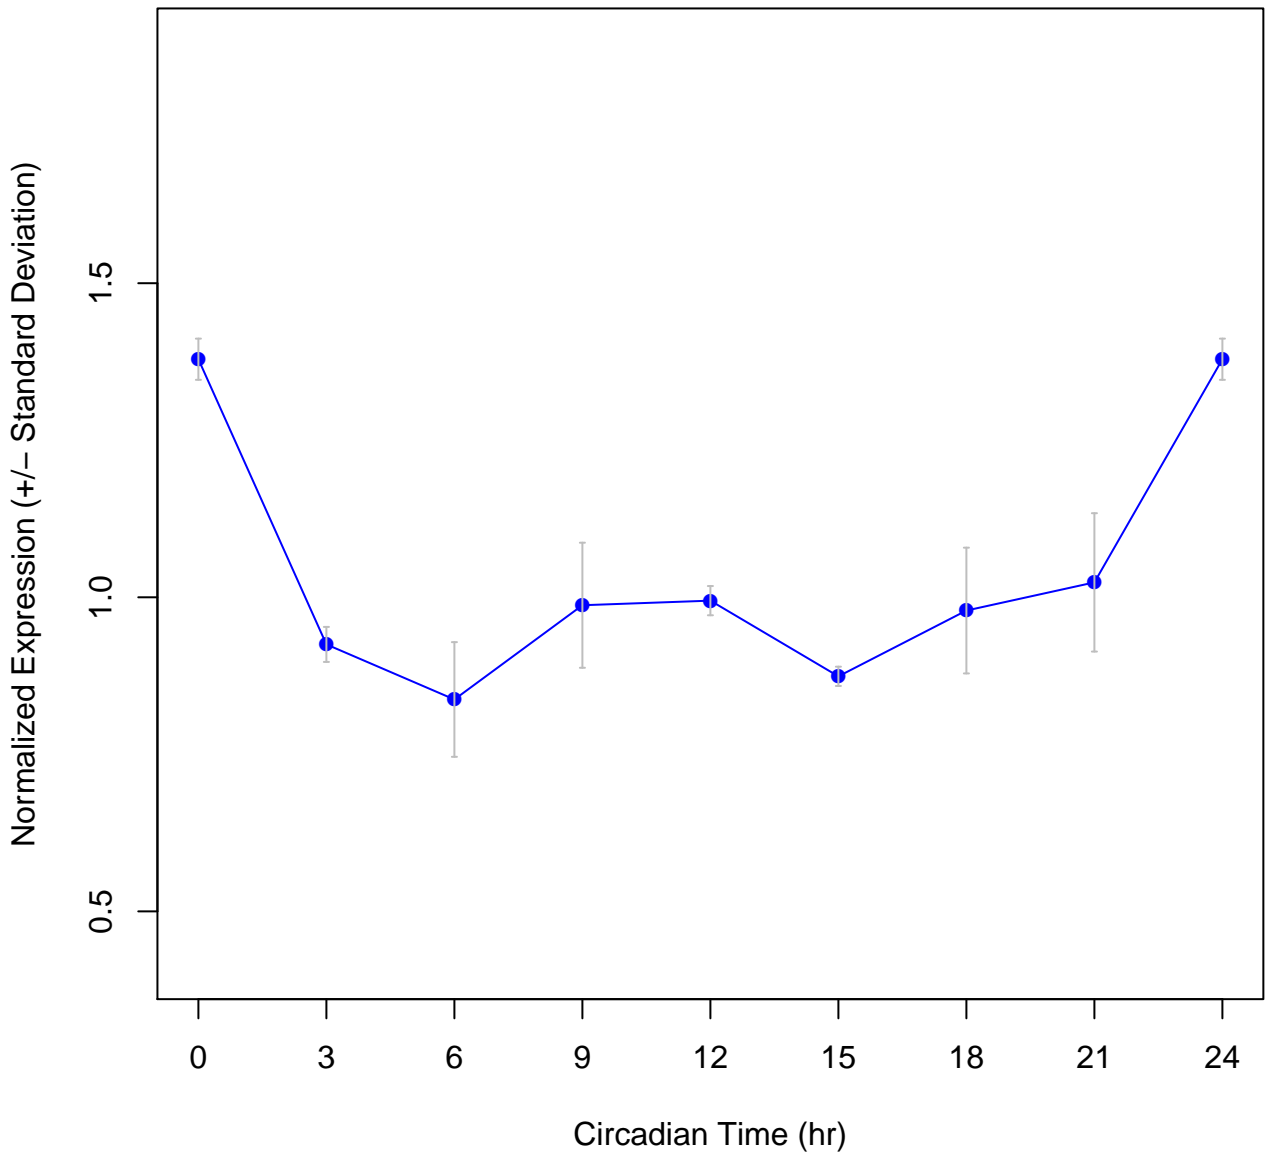

Supplement Figure 4 kat2b

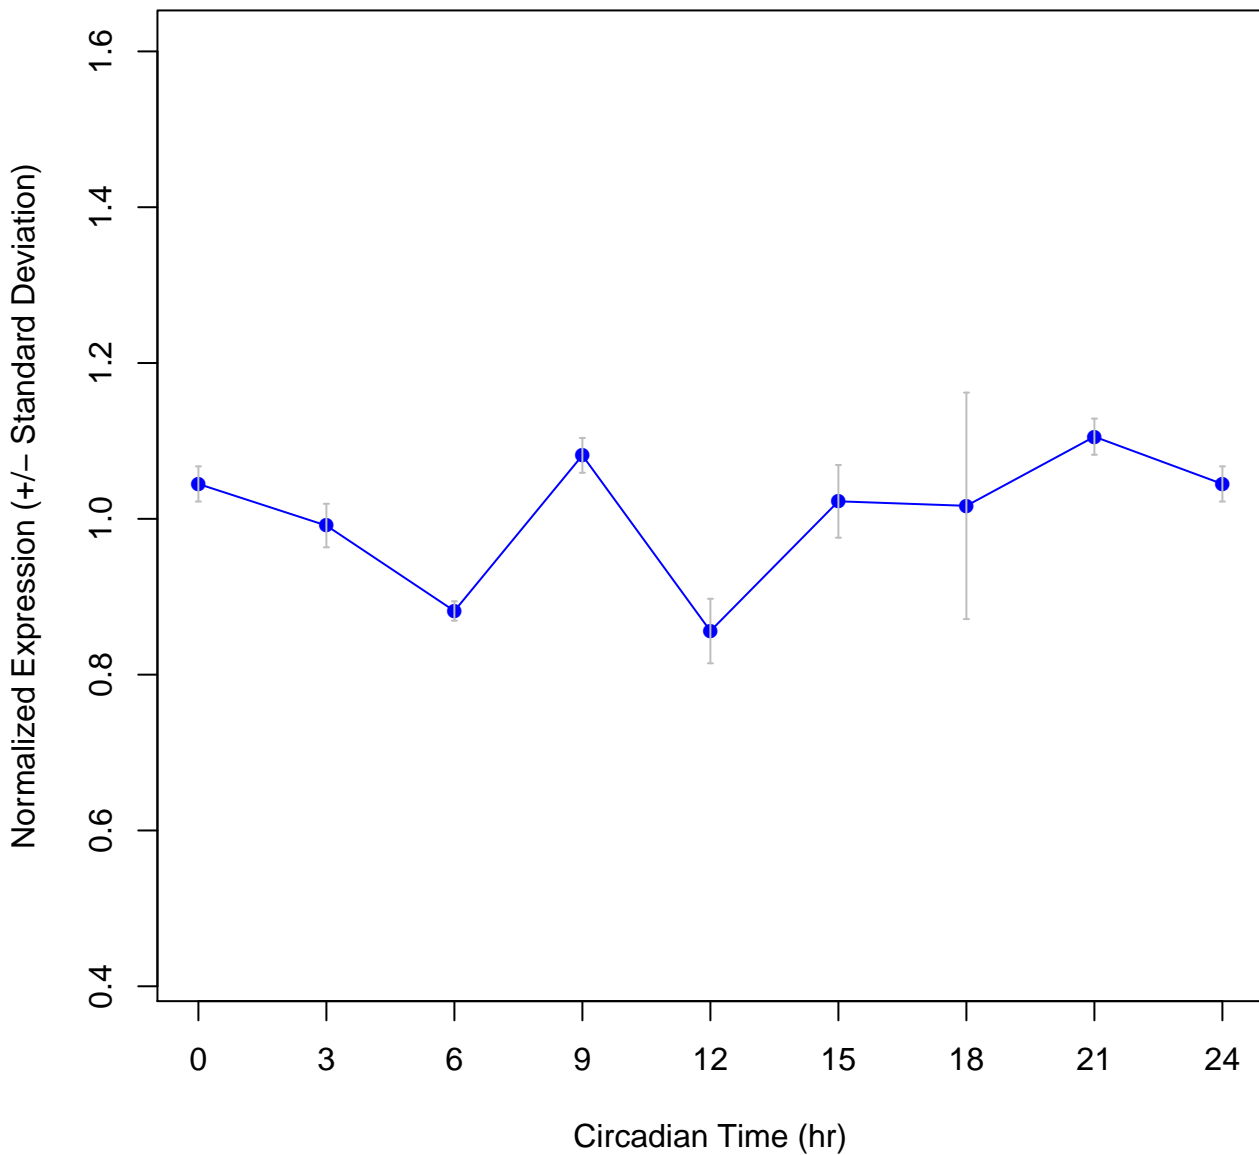

### Supplement Figure 4 kifc1

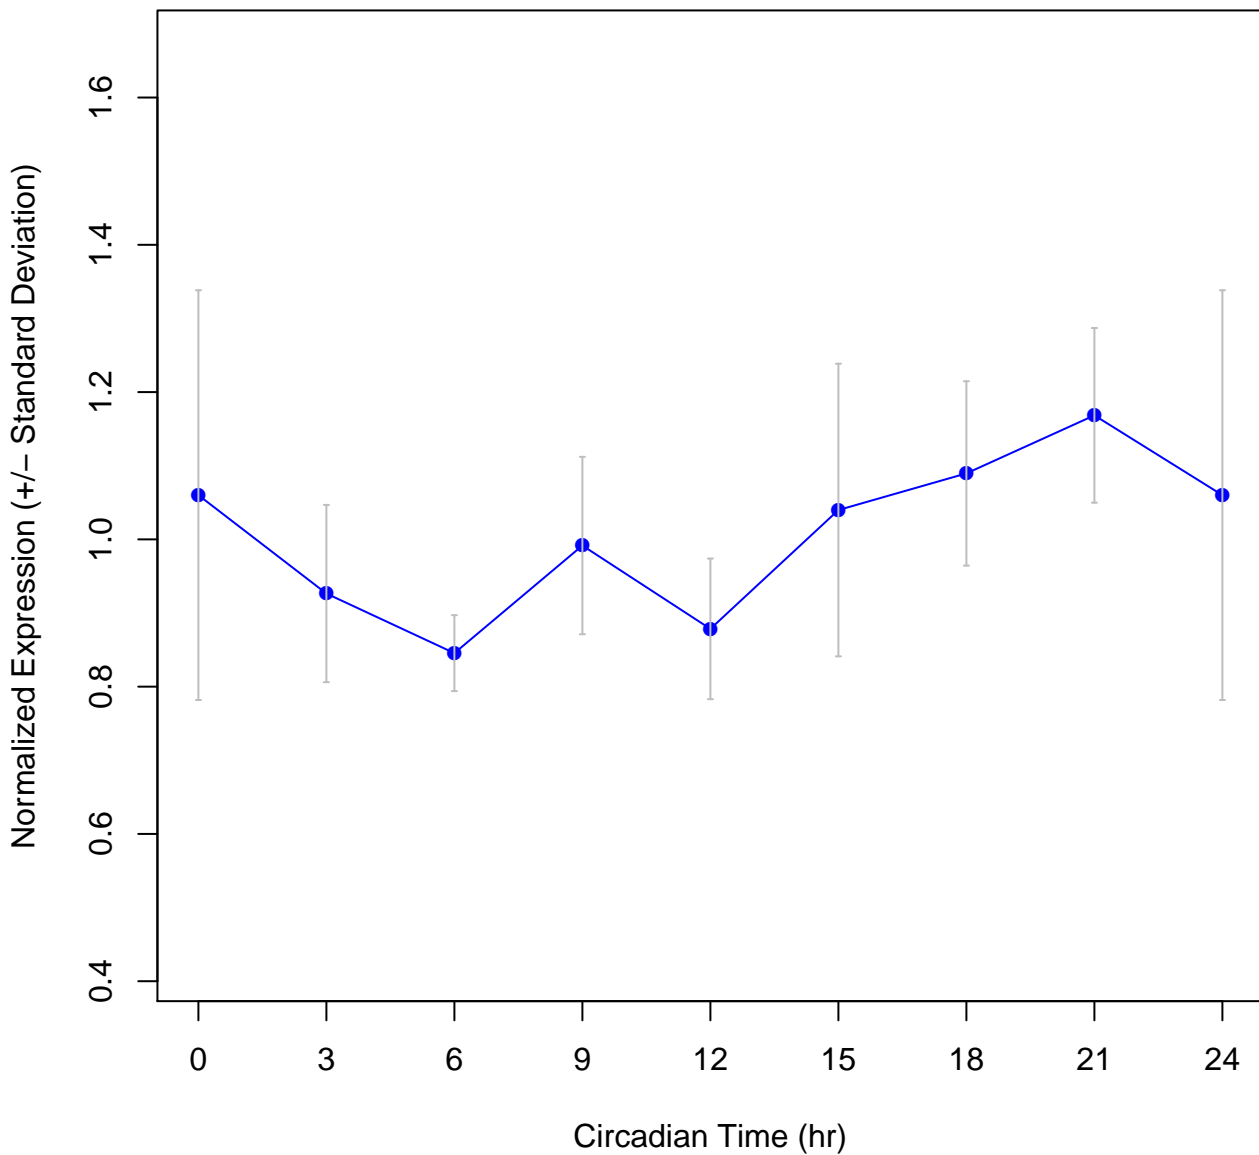

## Supplement Figure 4 kit

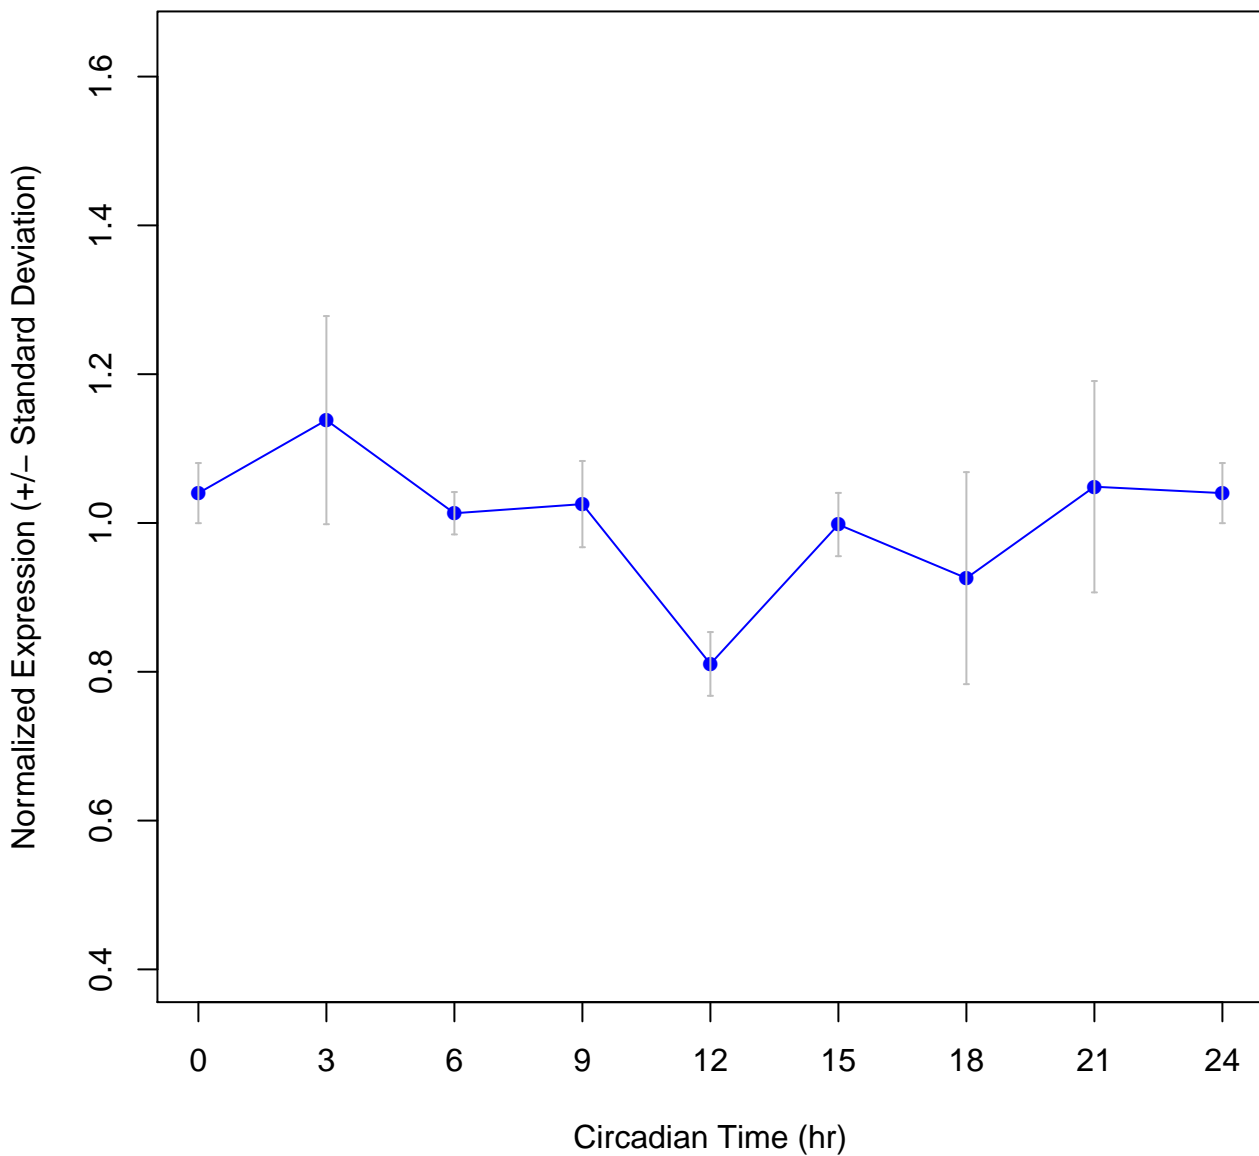



**Supplement Figure 4 klf10**

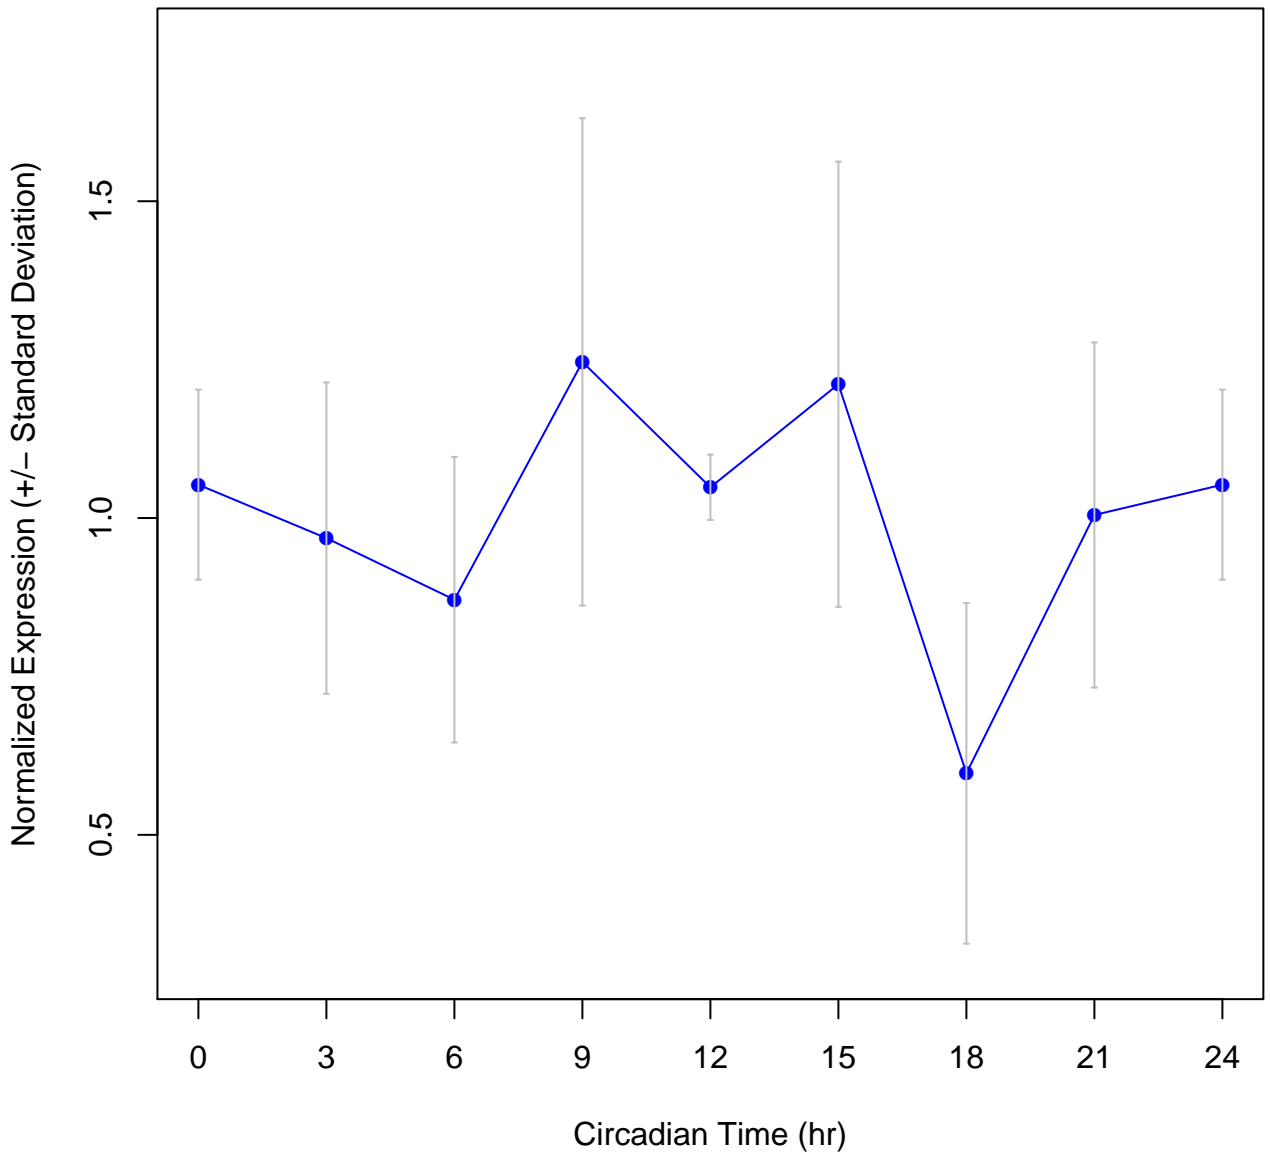

**Supplement Figure 4 klh138**

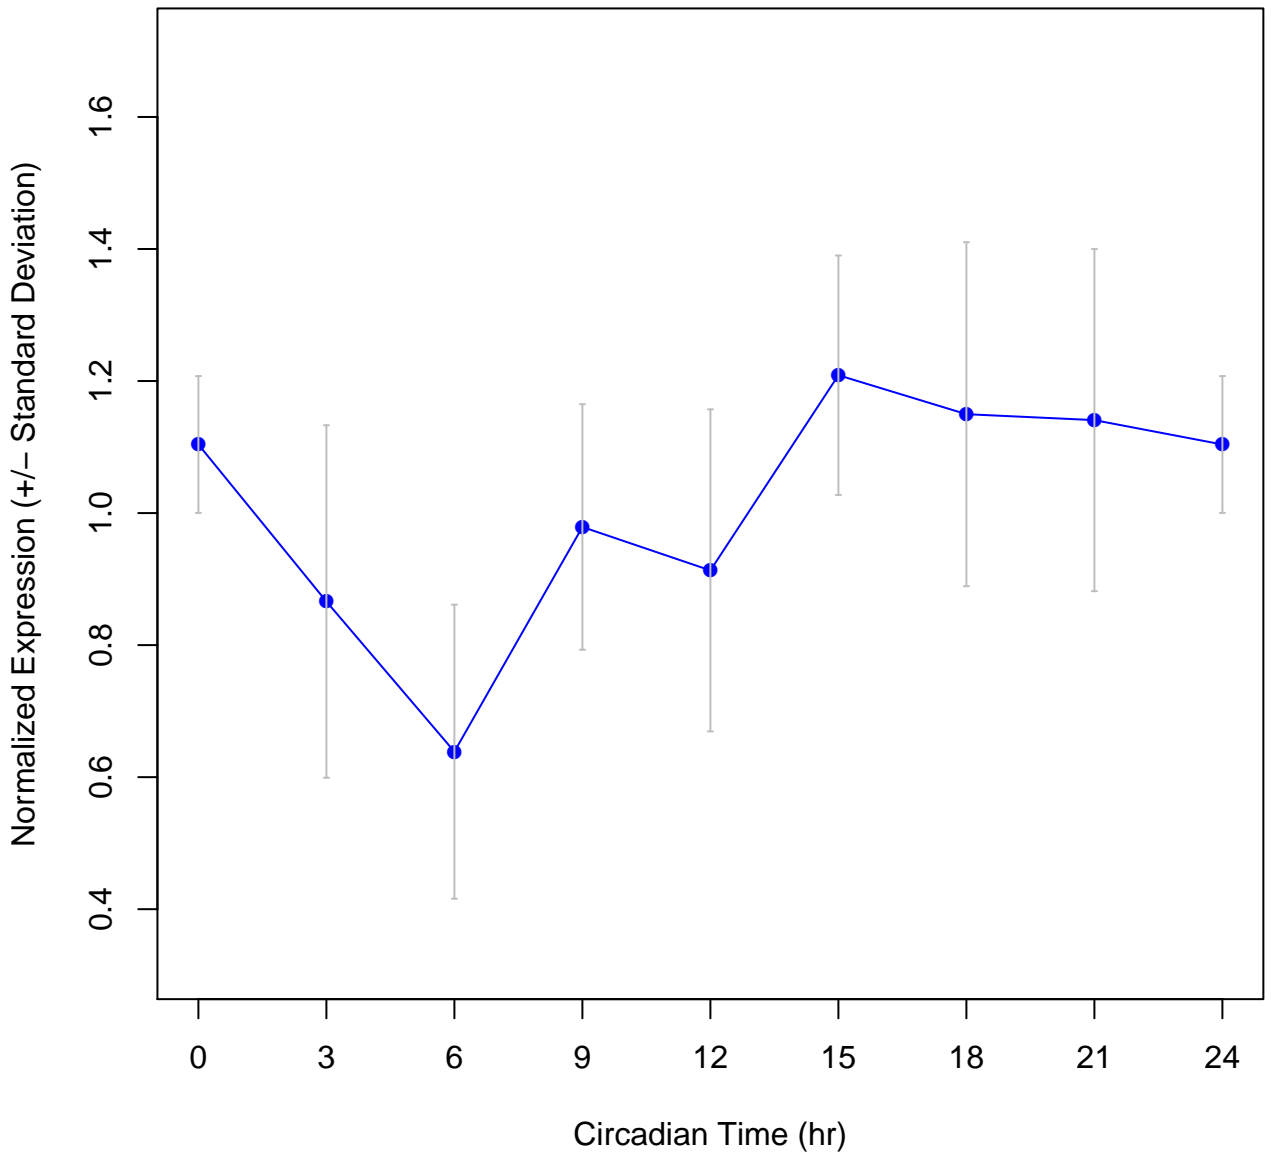

Supplement Figure 4 kmt2a

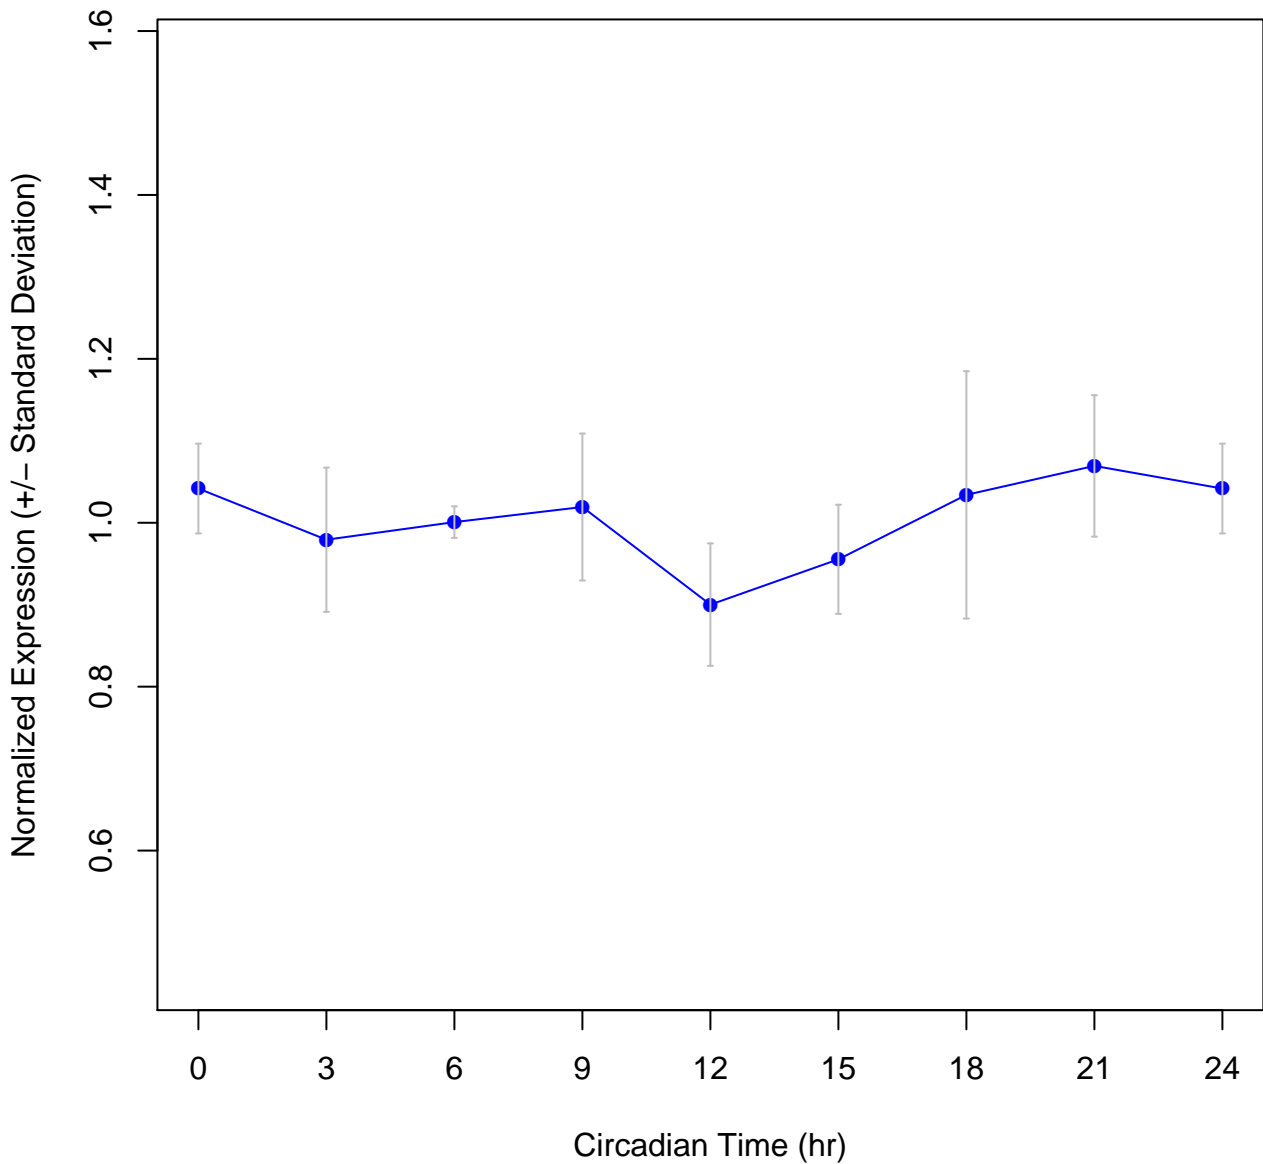

Supplement Figure 4 kpna2

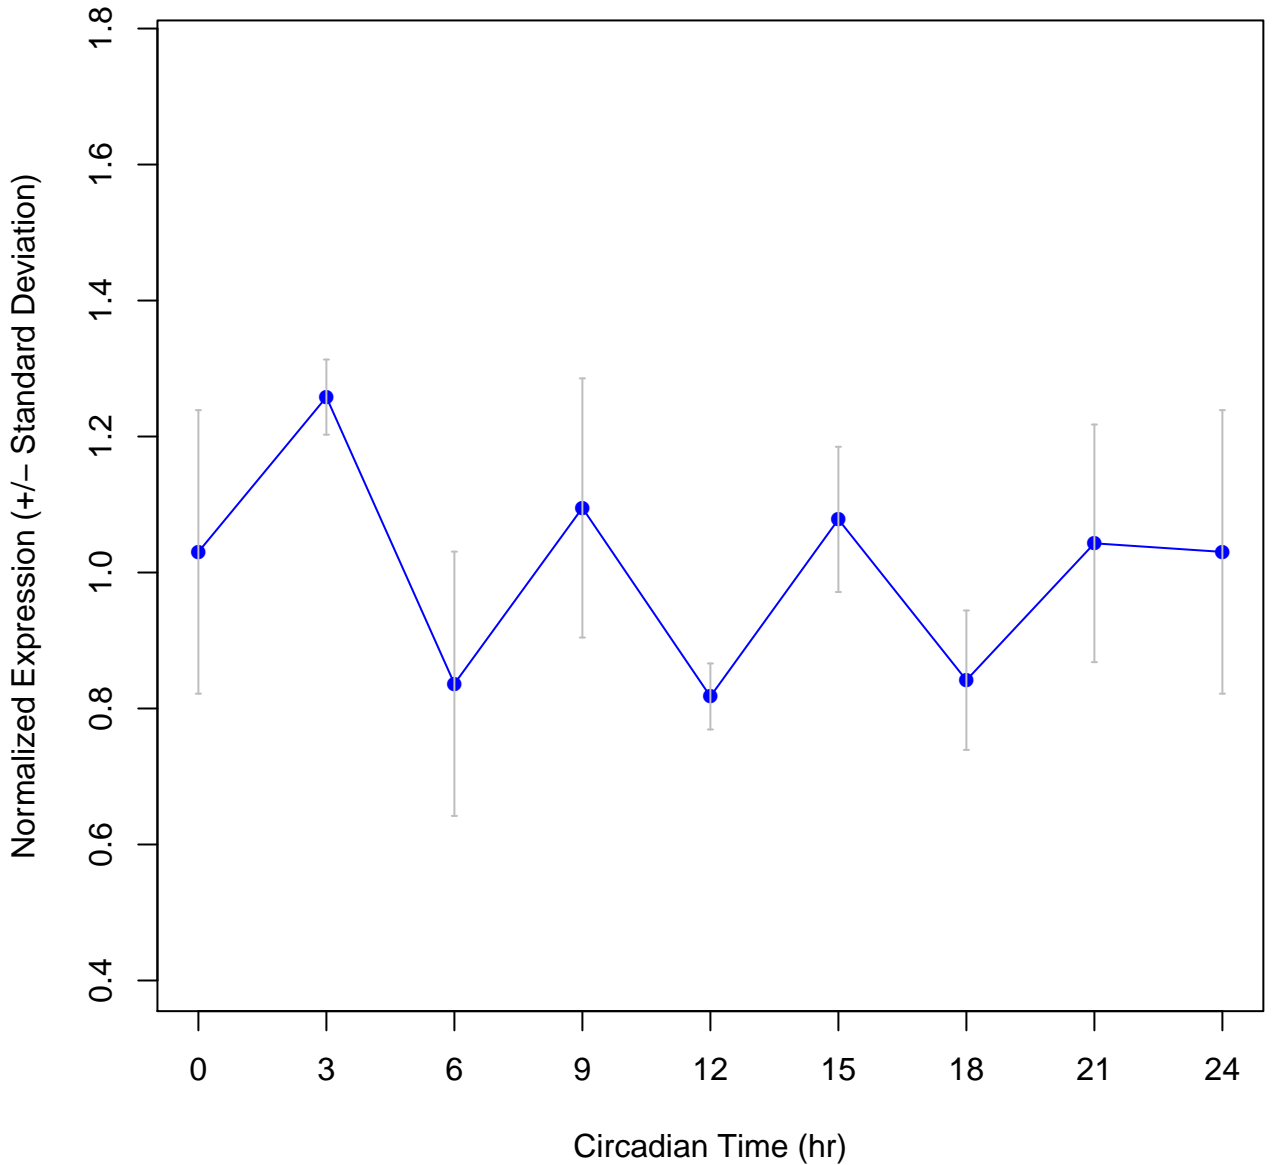

**Supplement Figure 4 lcp2**

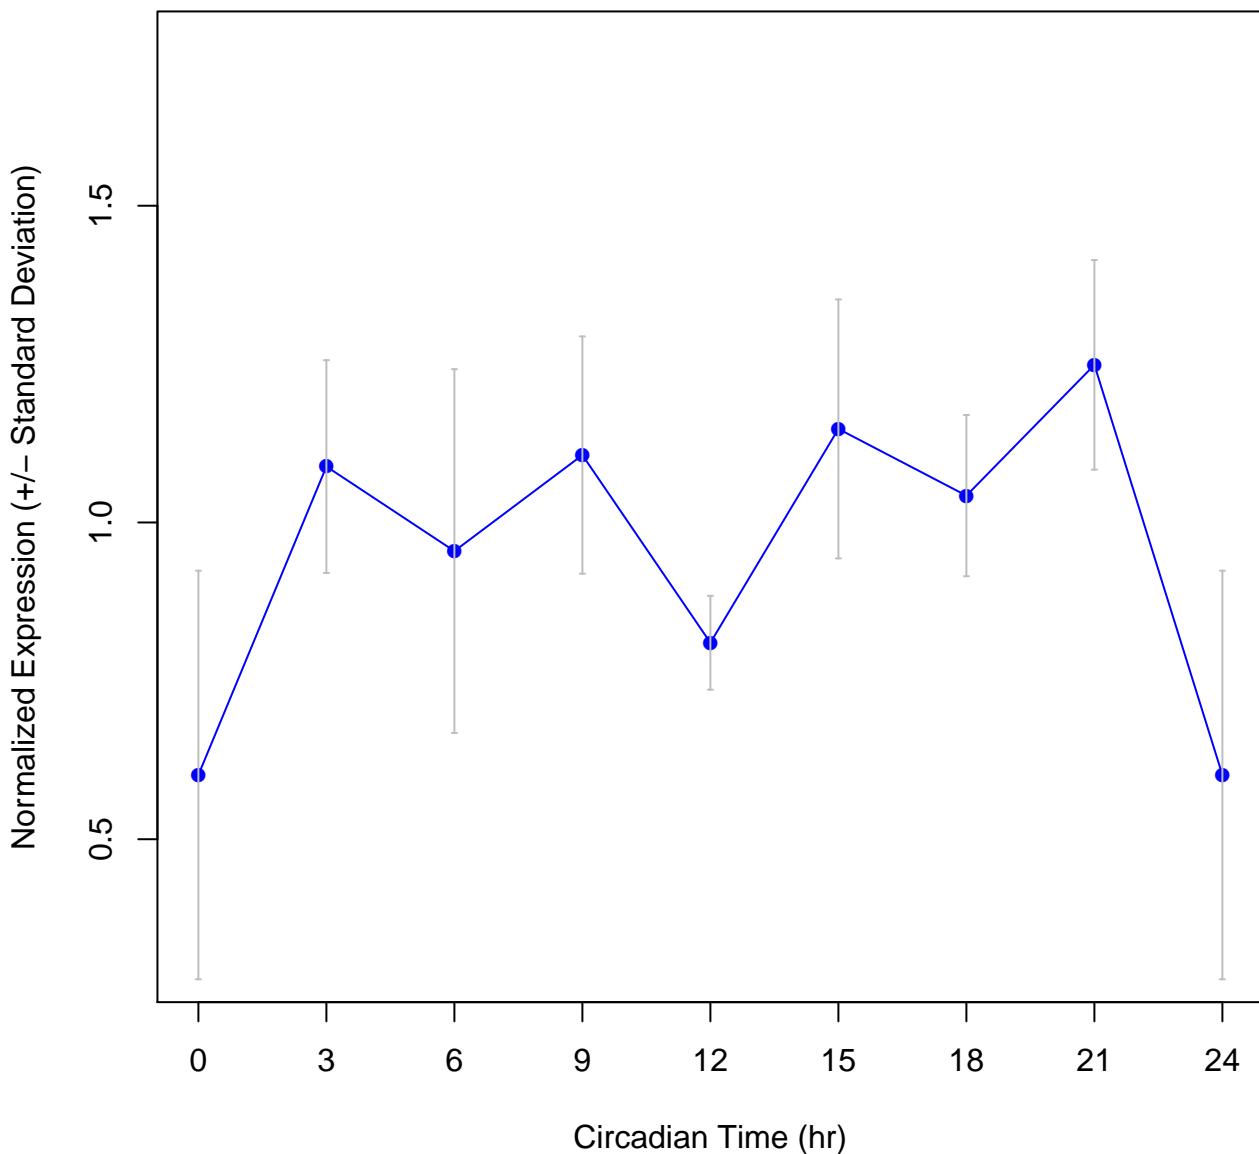

## Supplement Figure 4 Ikb1

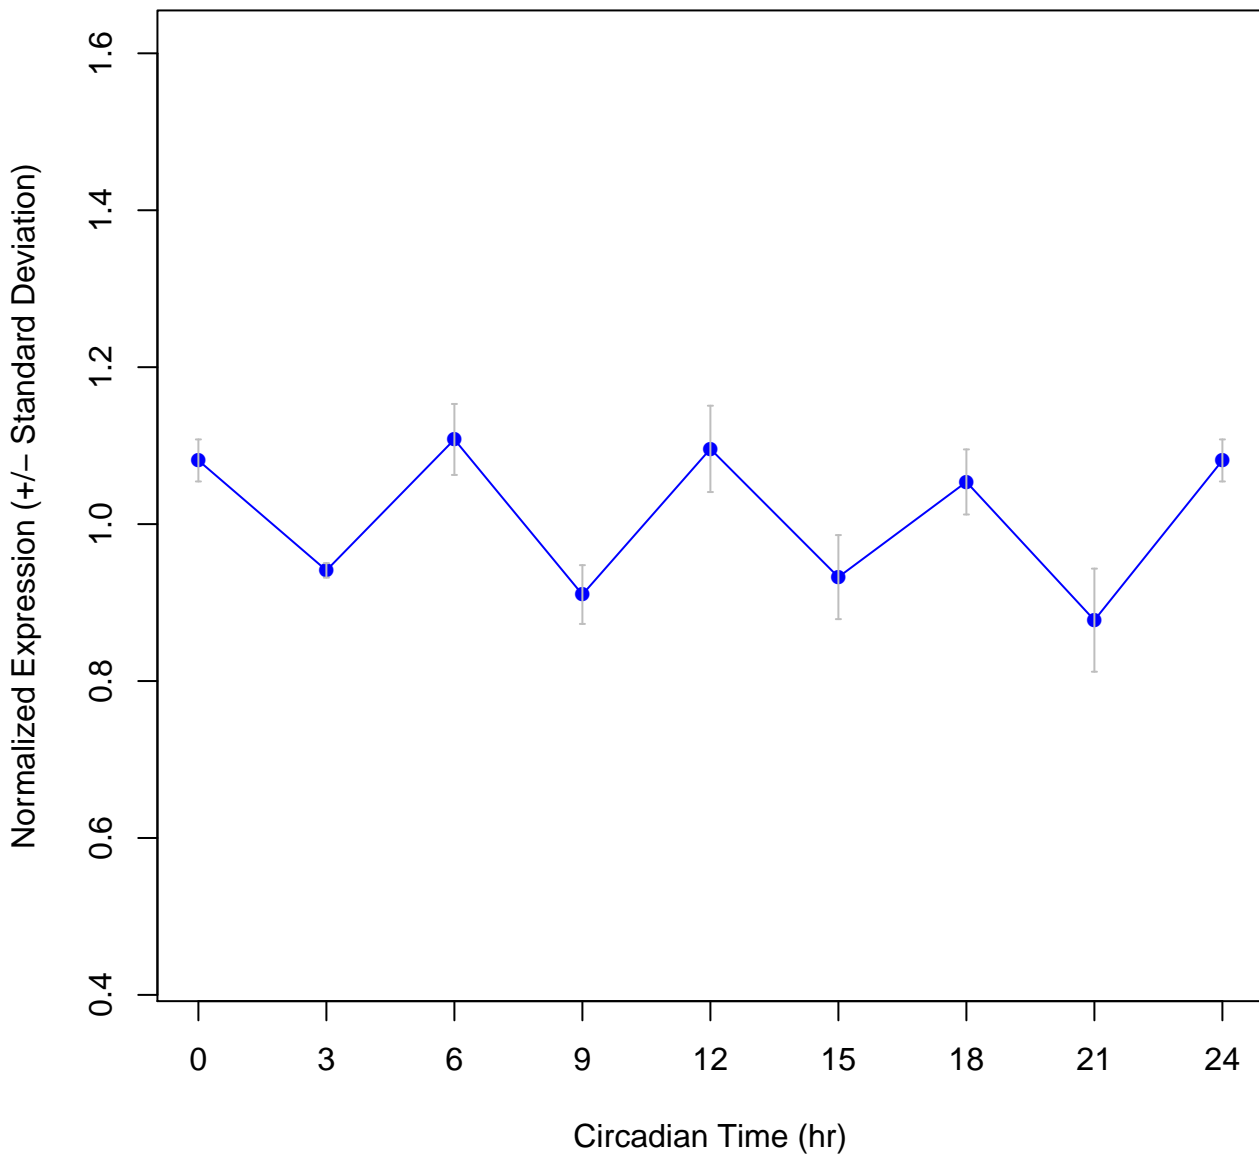

## Supplement Figure 4 Ipin1

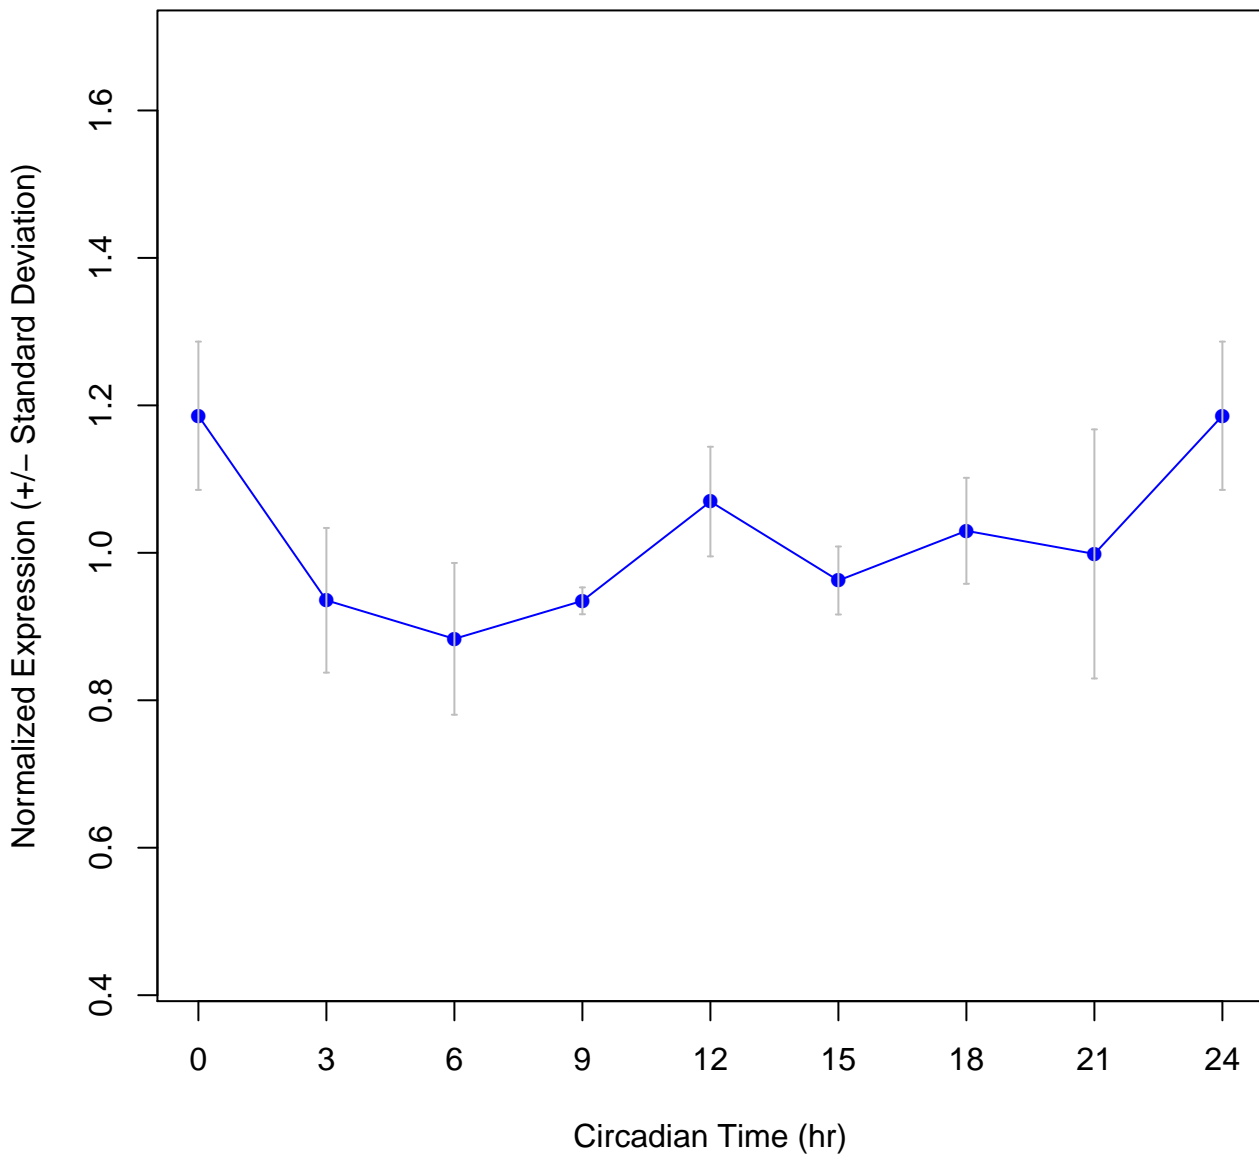

Supplement Figure 4 mad211

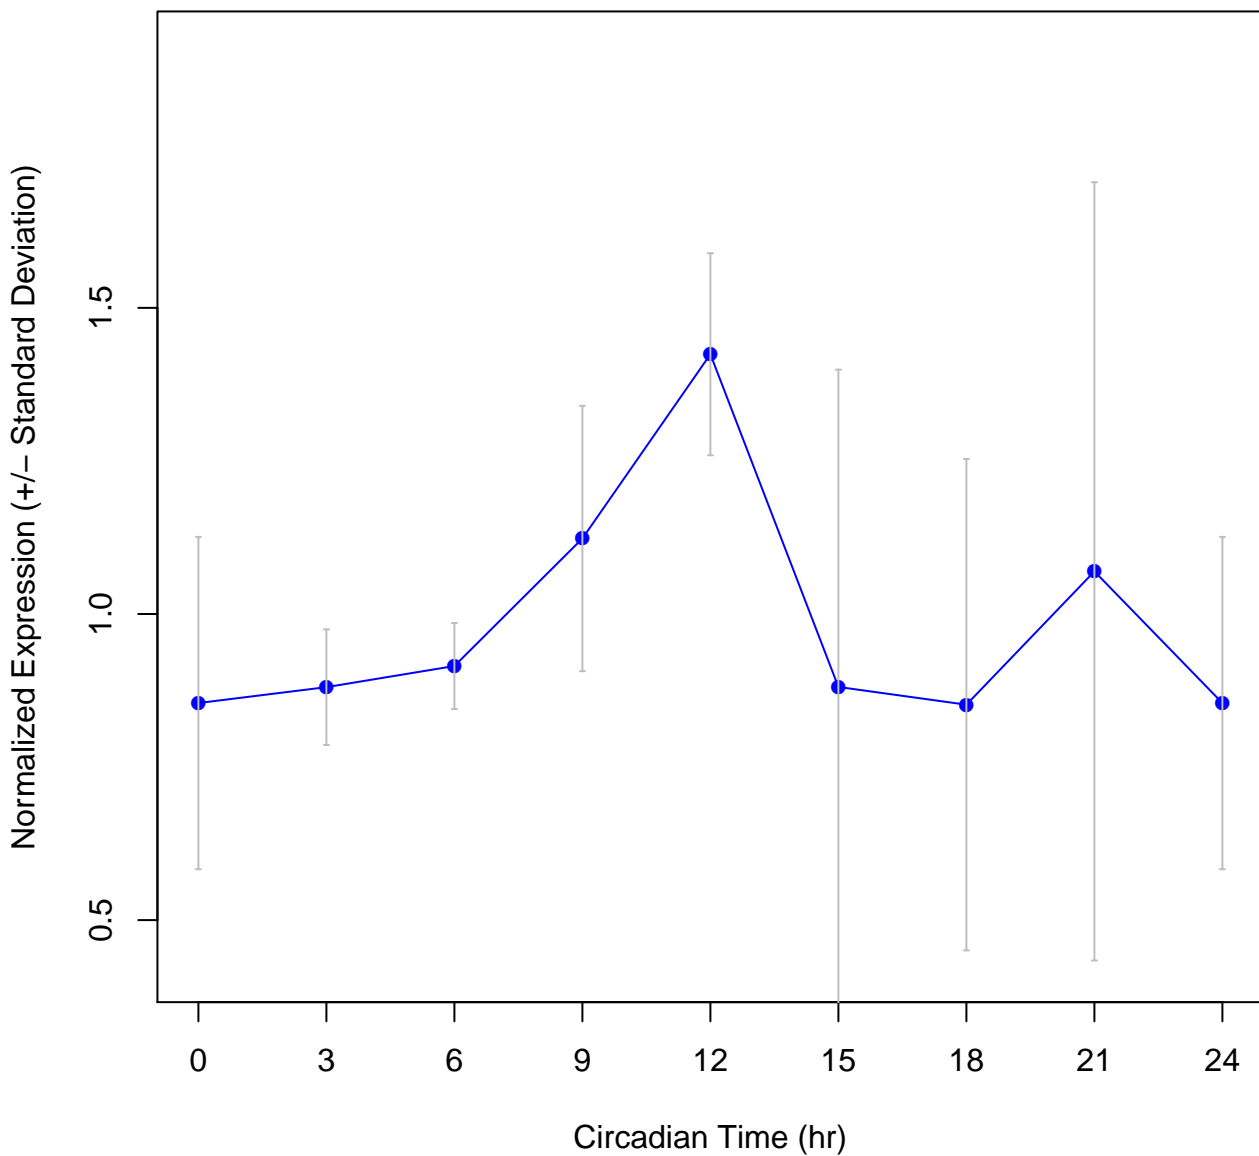



Supplement Figure 4 map2k1

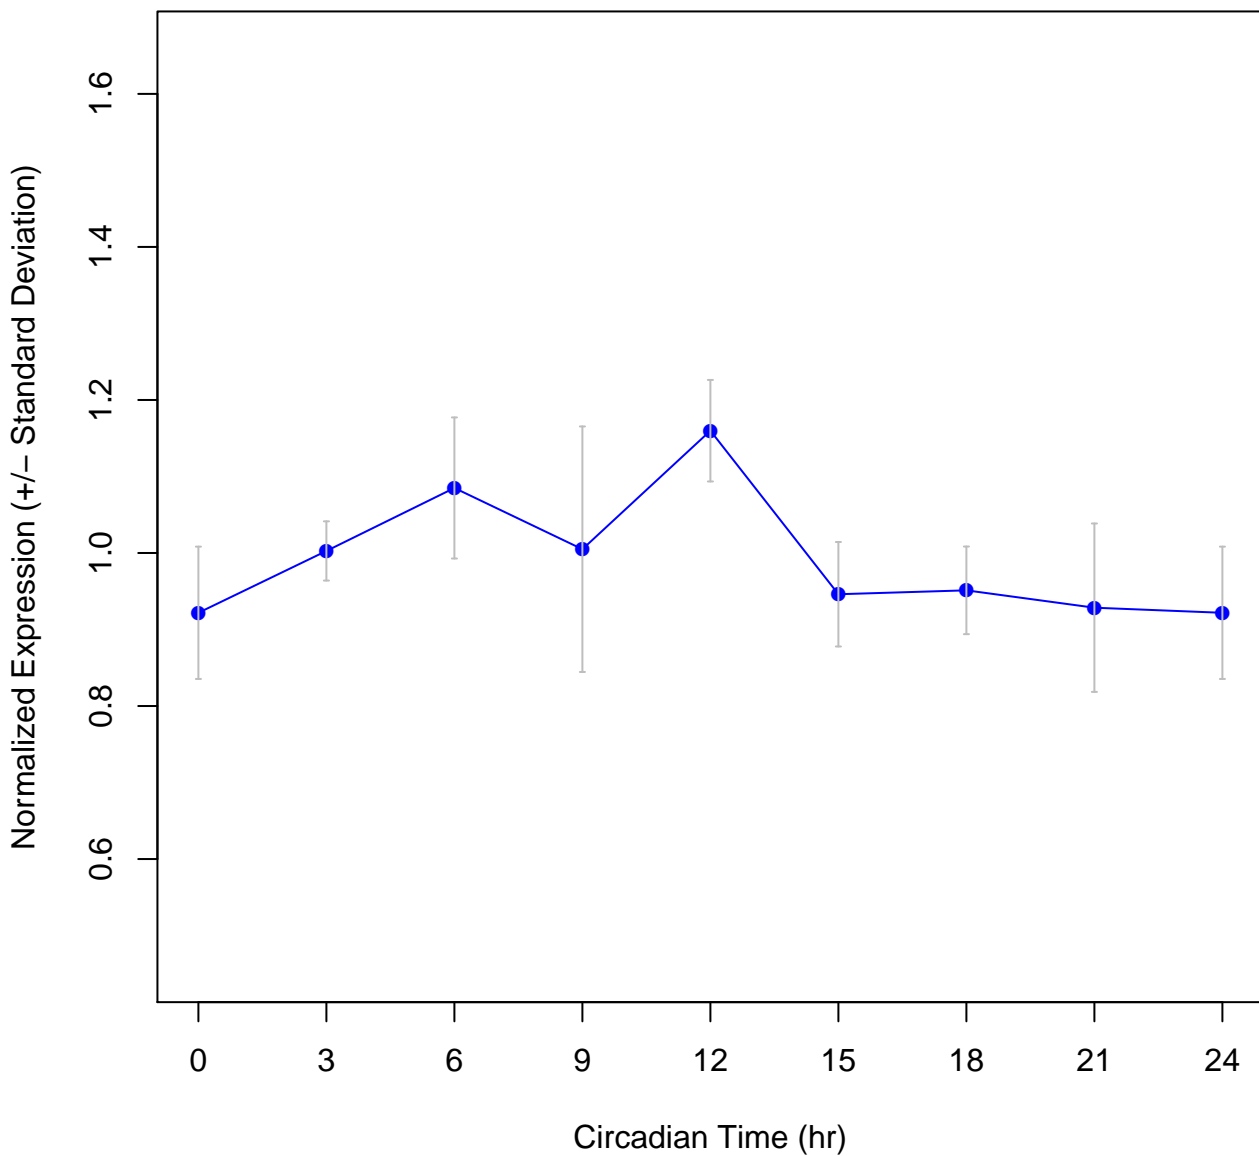

Supplement Figure 4 map2k6

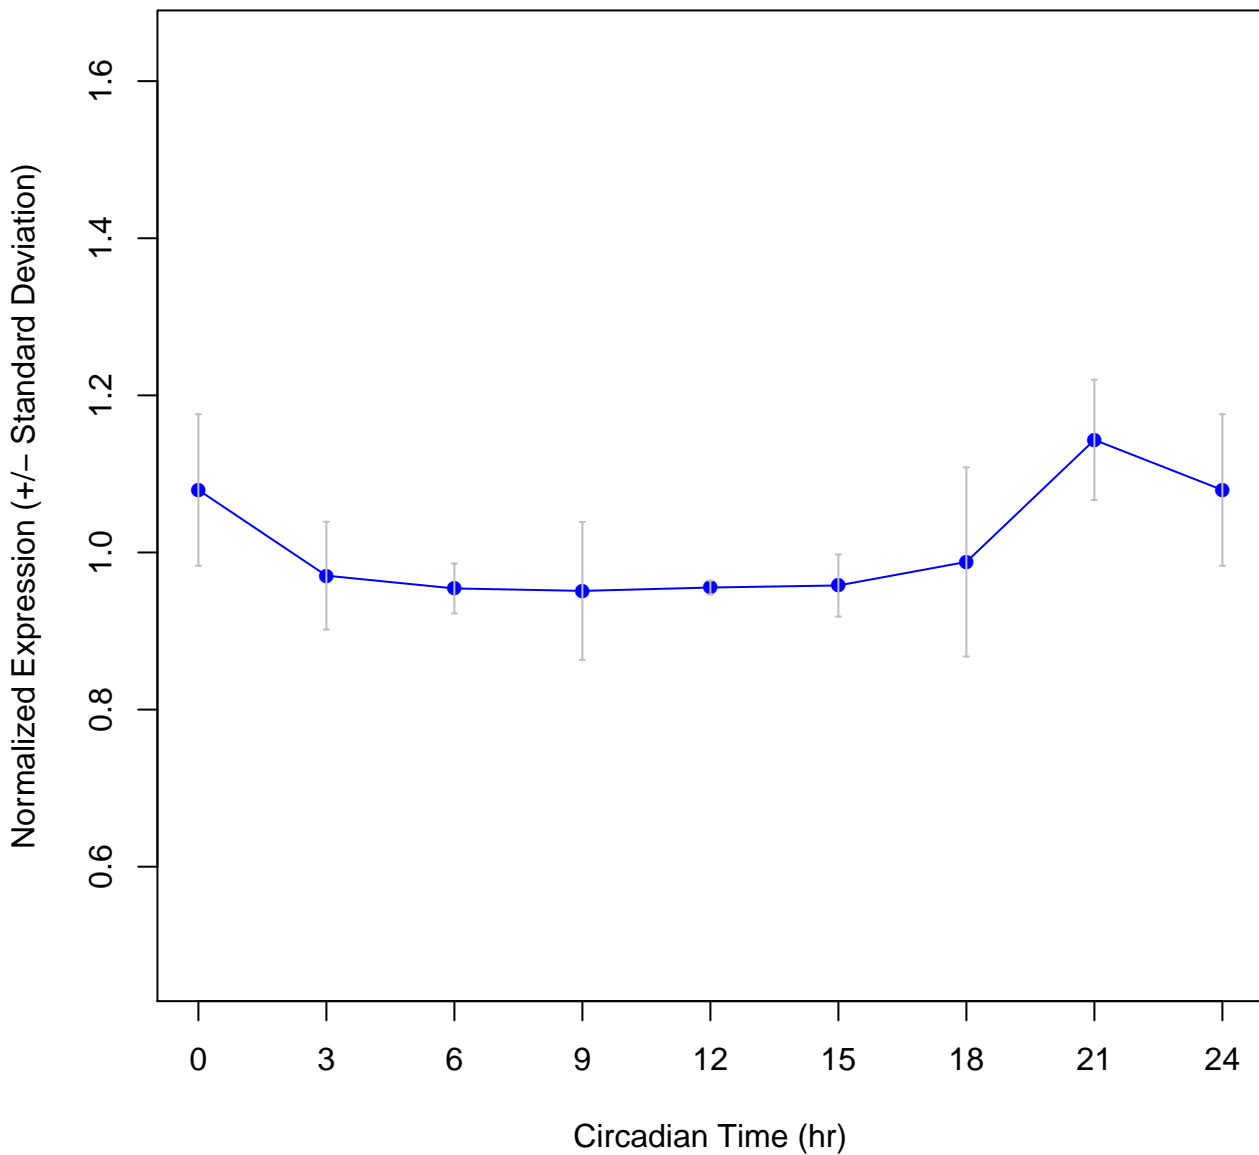

Supplement Figure 4 mcl1

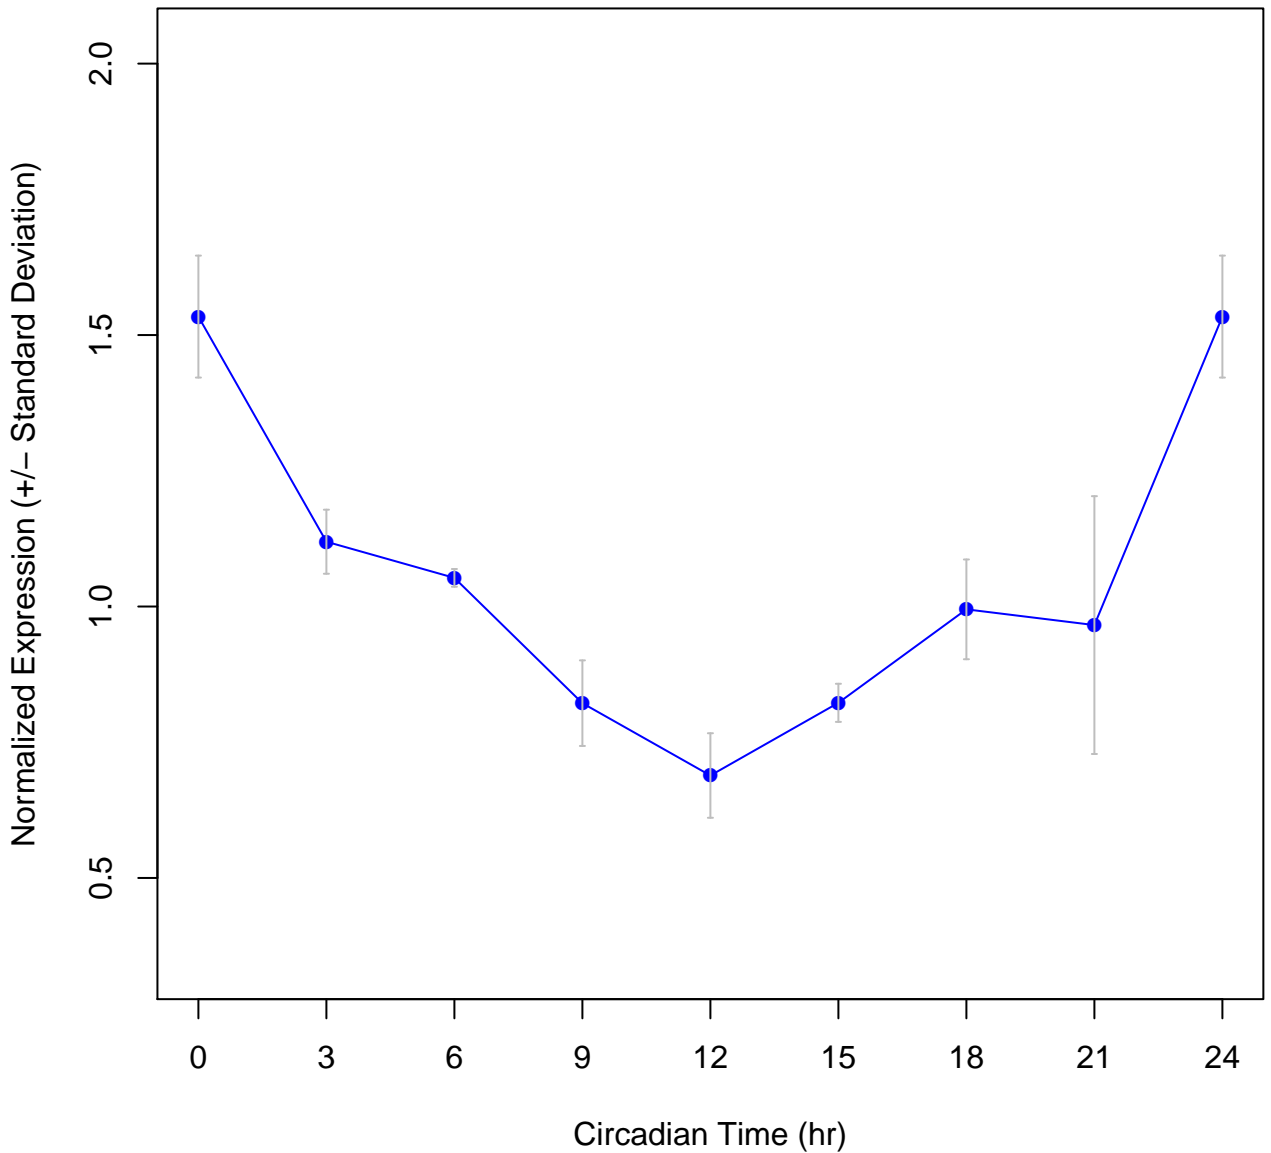

Supplement Figure 4 me1

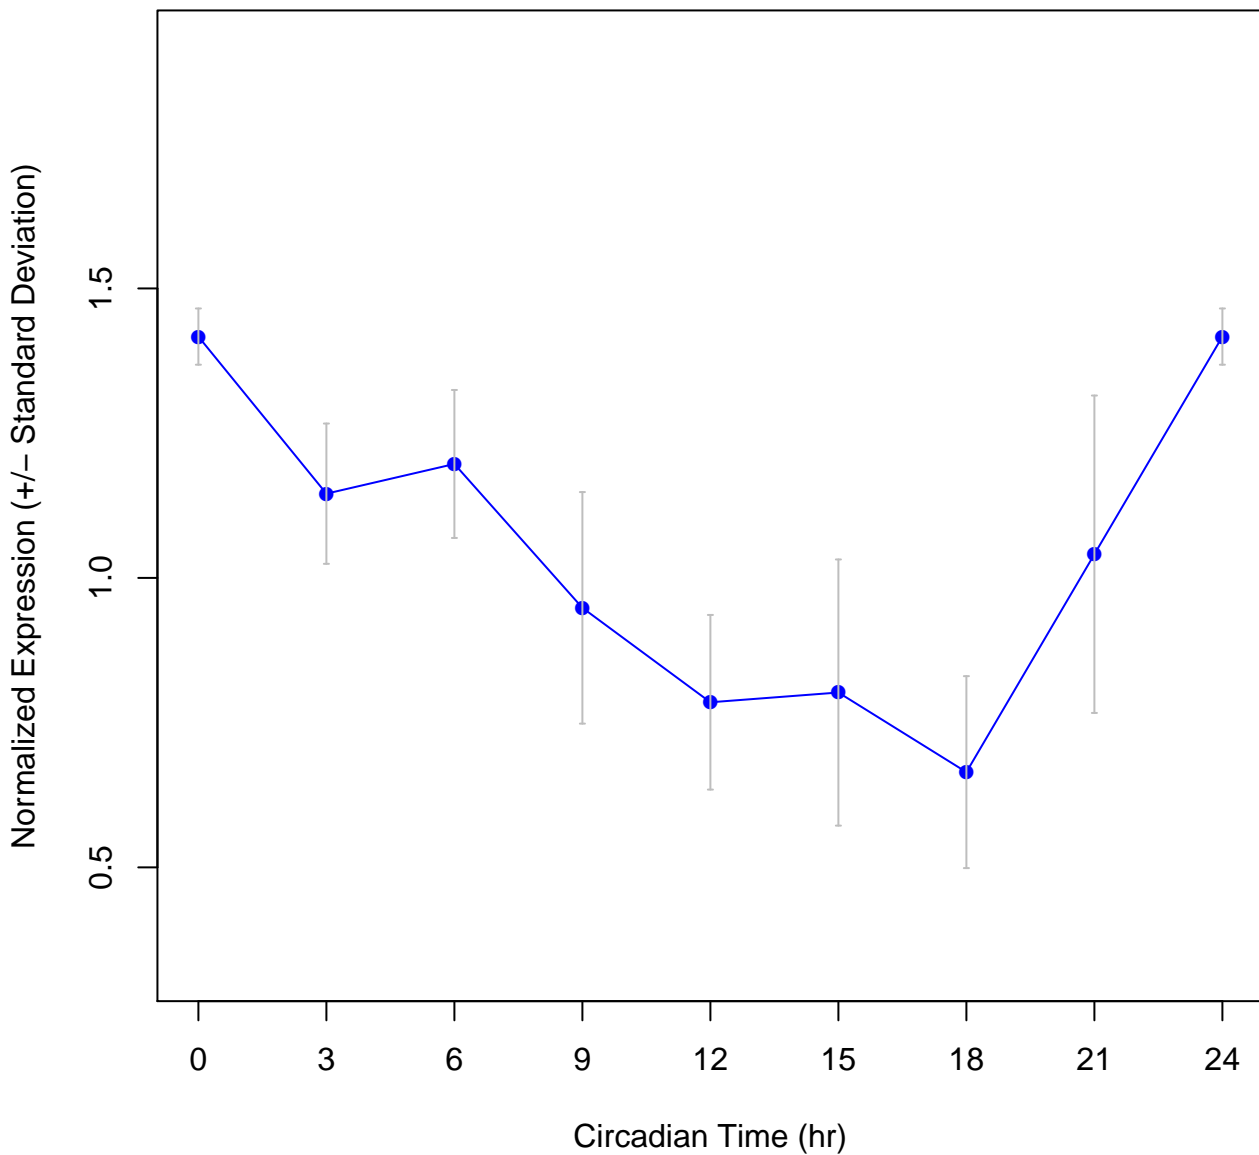

Supplement Figure 4 mgst1

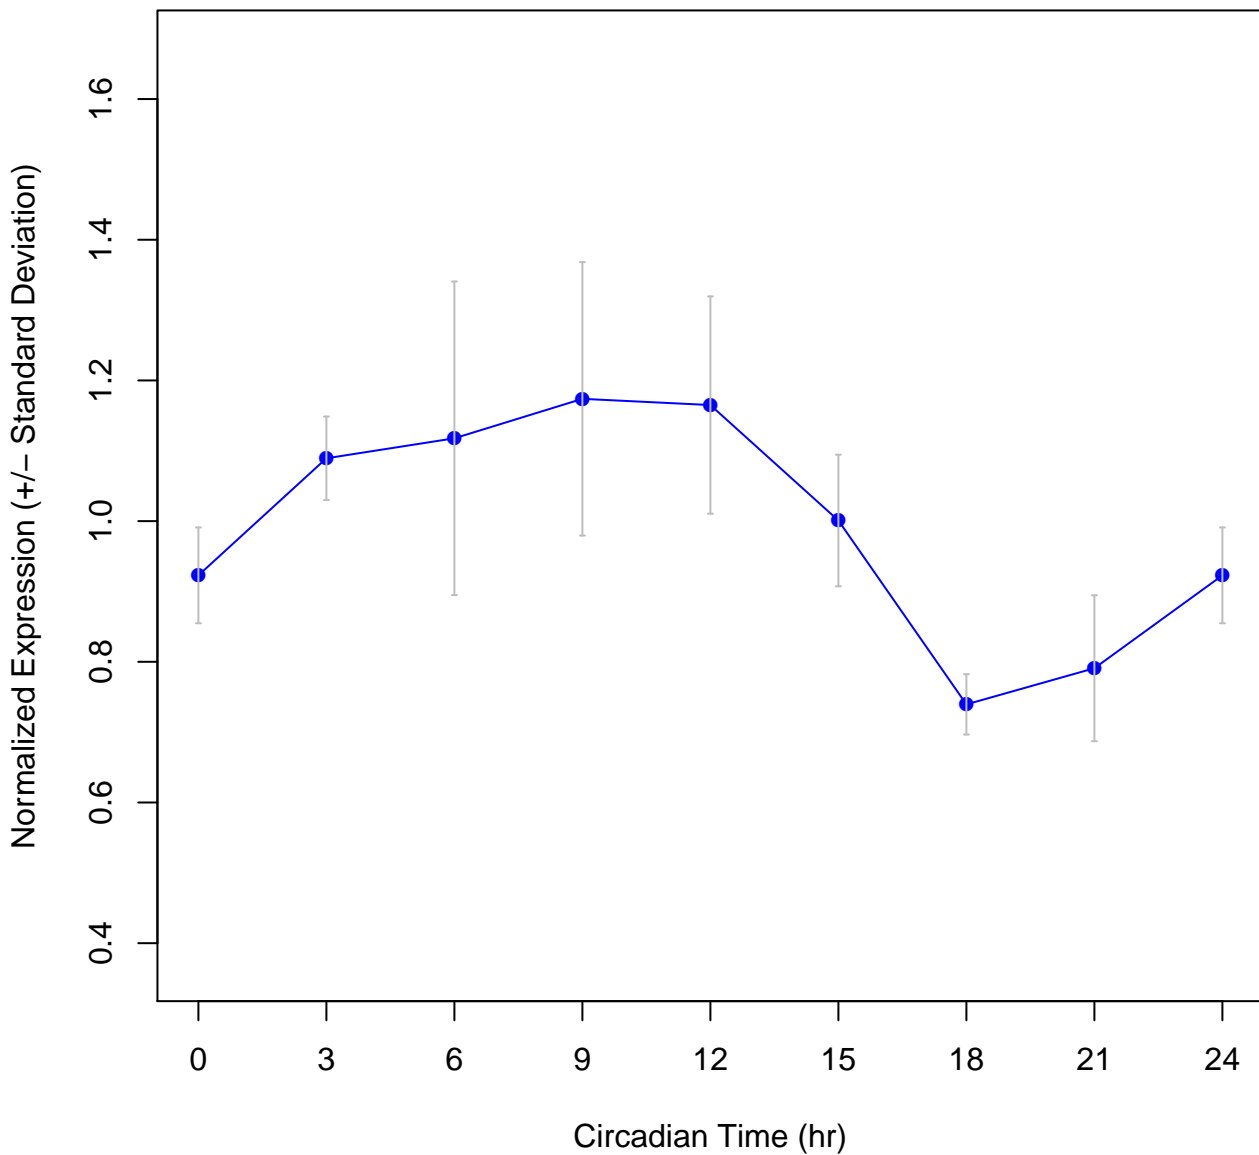

Supplement Figure 4 mitf

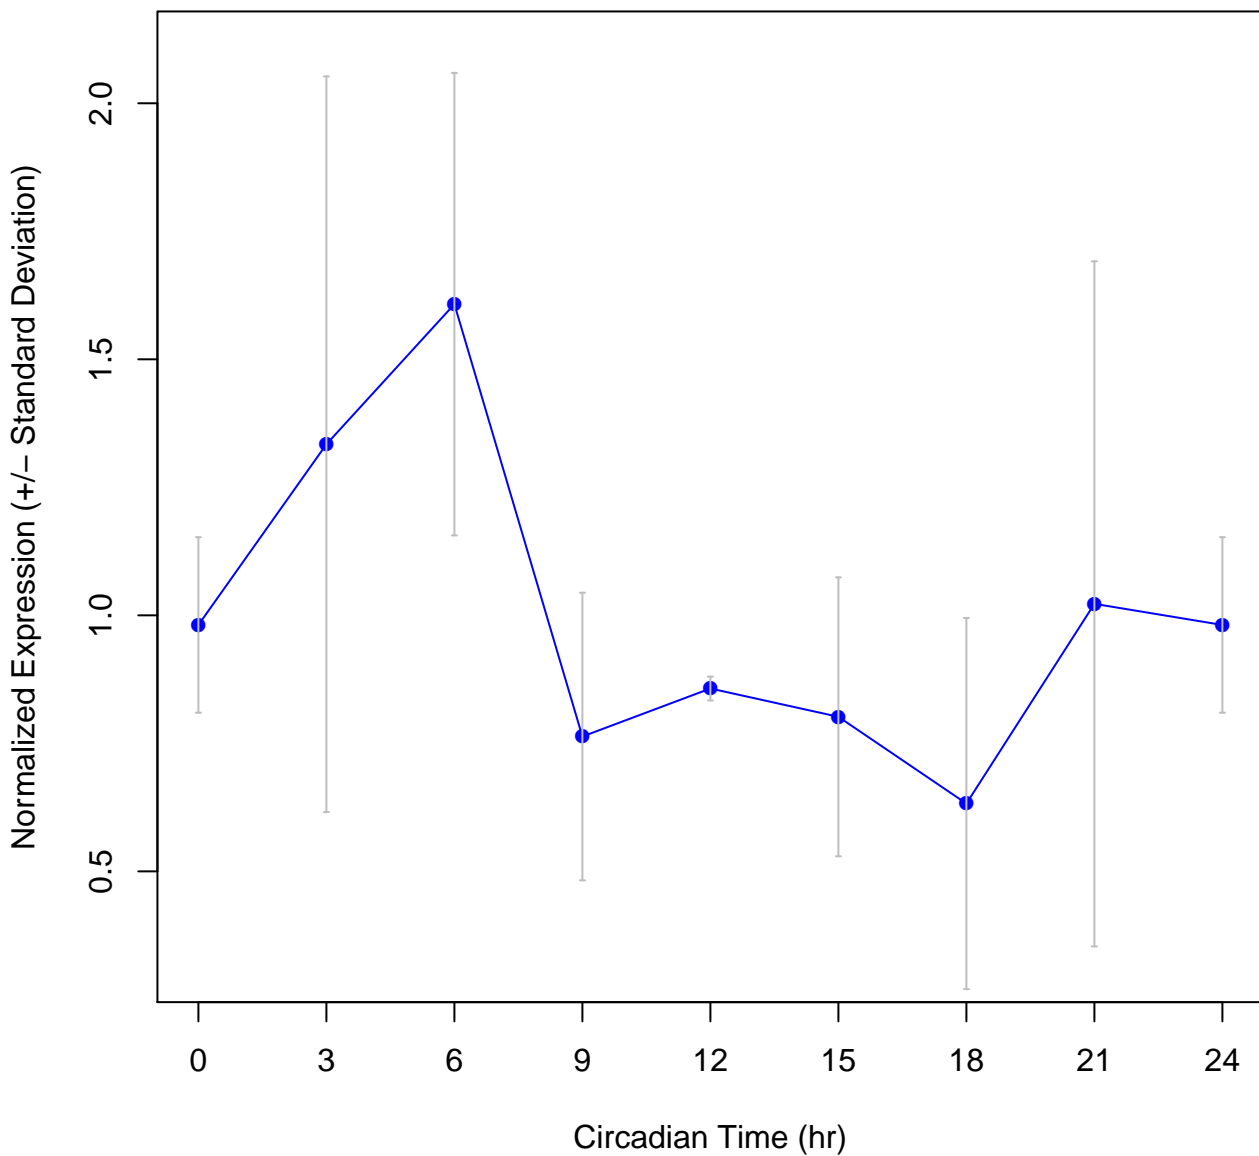

Supplement Figure 4 mtcl

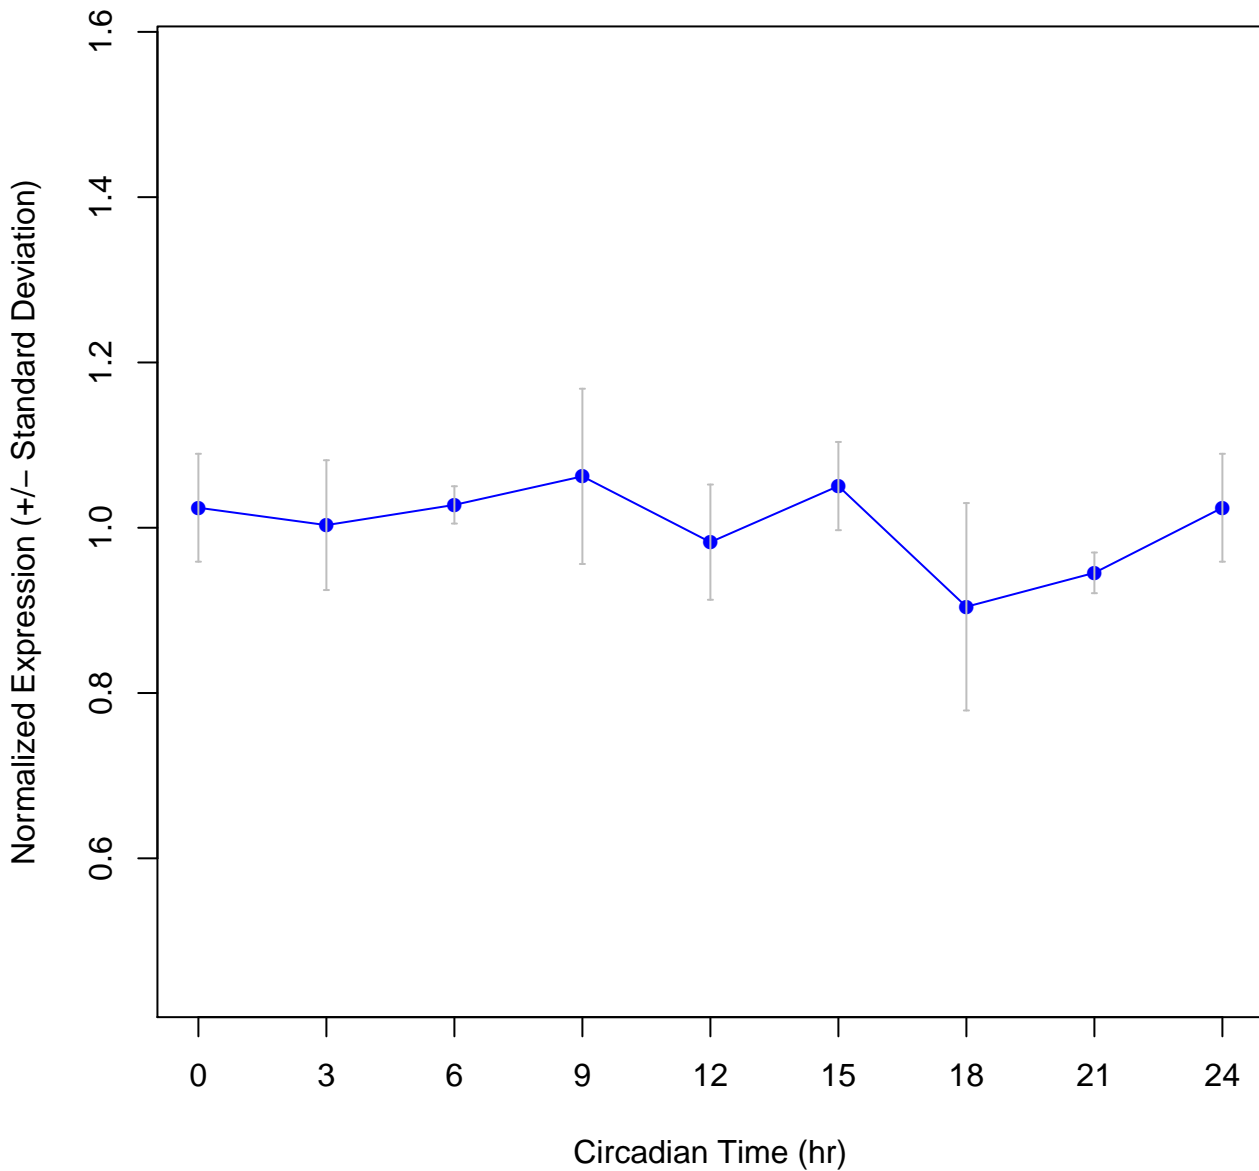

## Supplement Figure 4 mtor

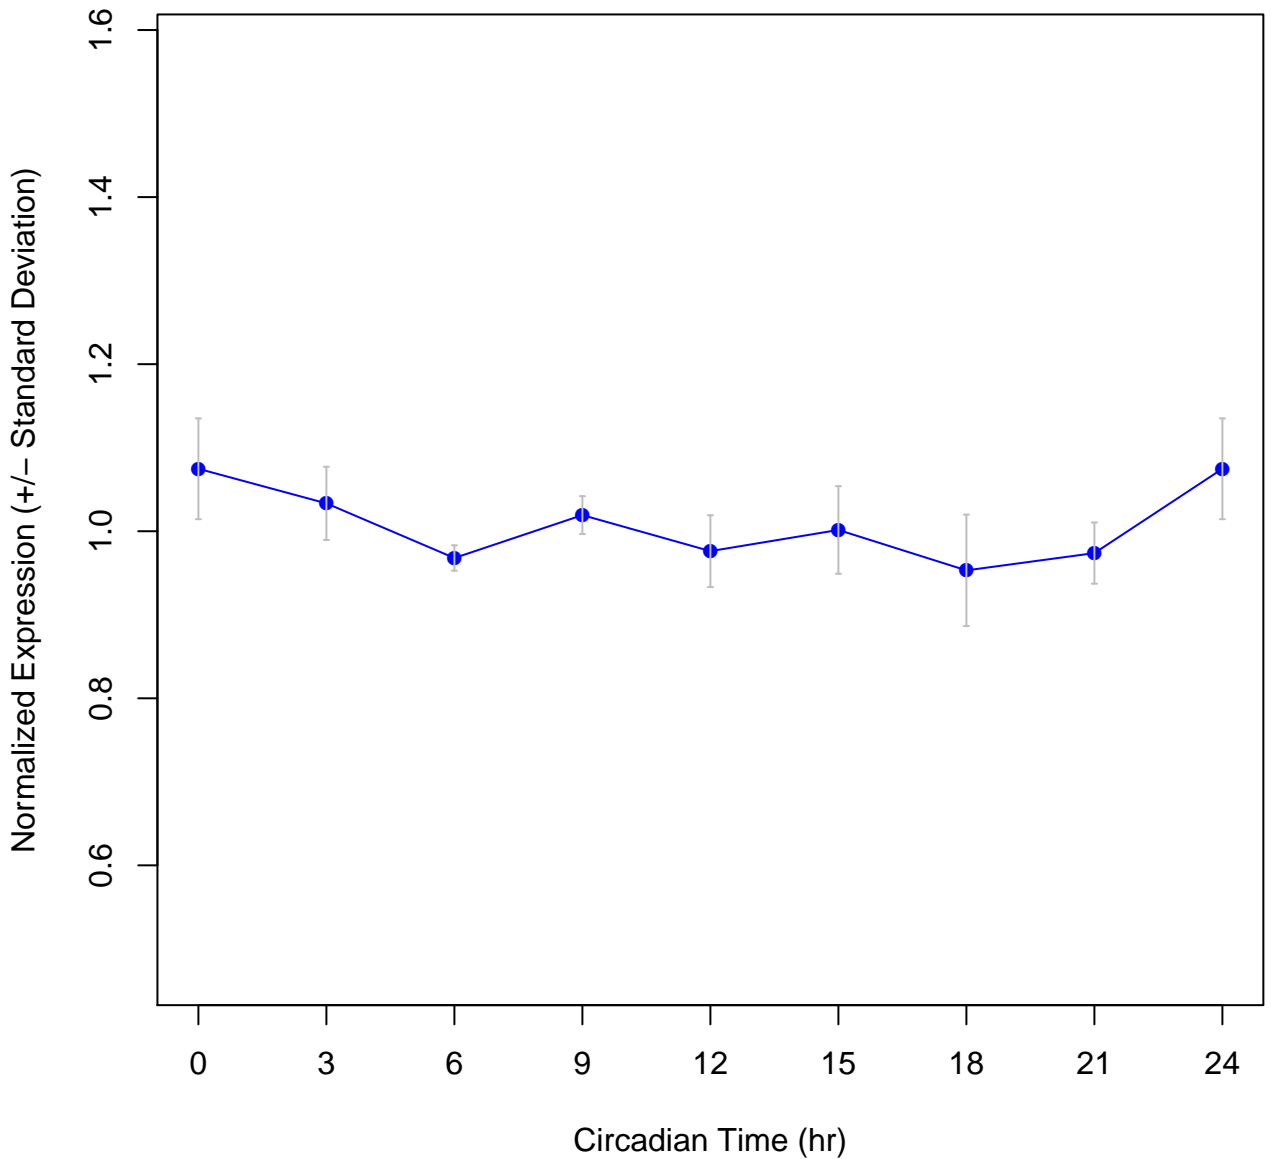



Supplement Figure 4 myh14

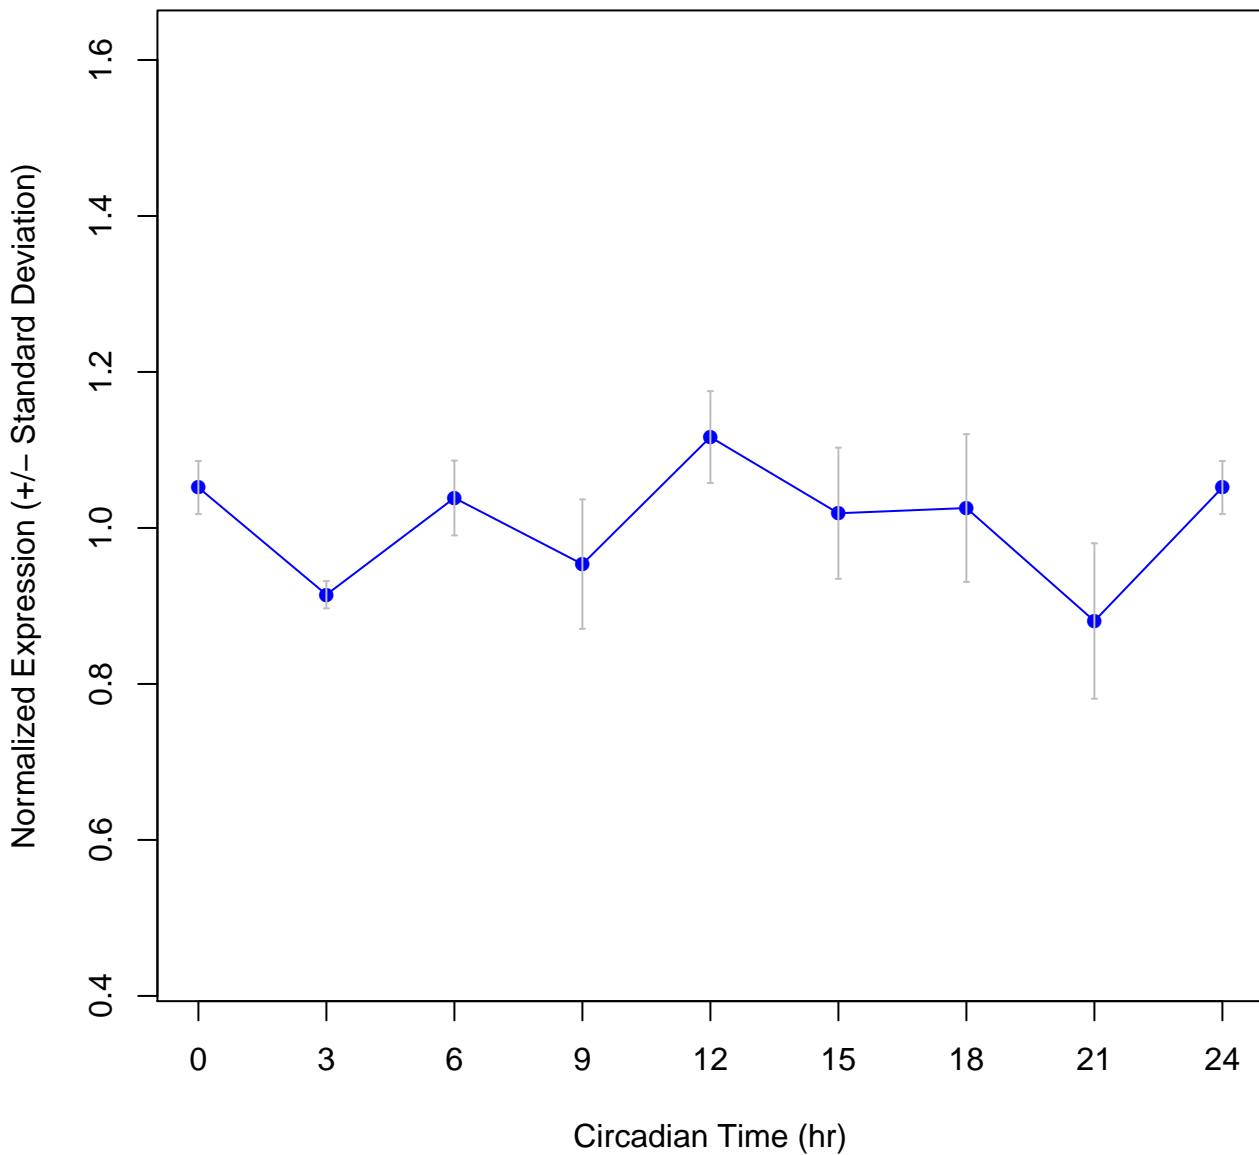

Supplement Figure 4 myl2b

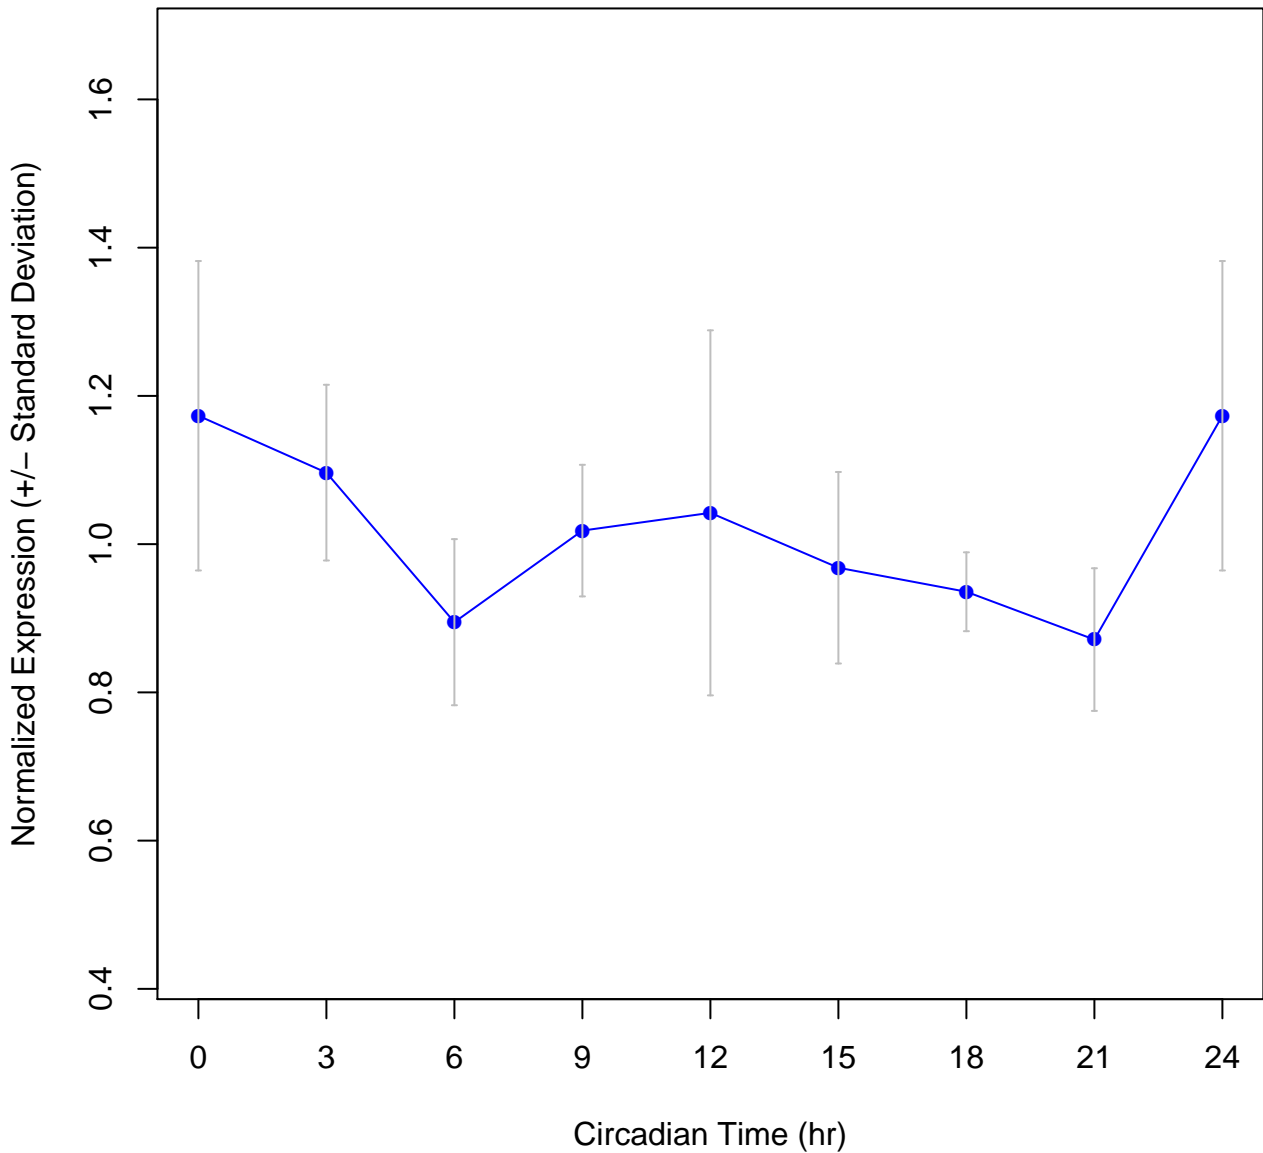

Supplement Figure 4 nadsyn1

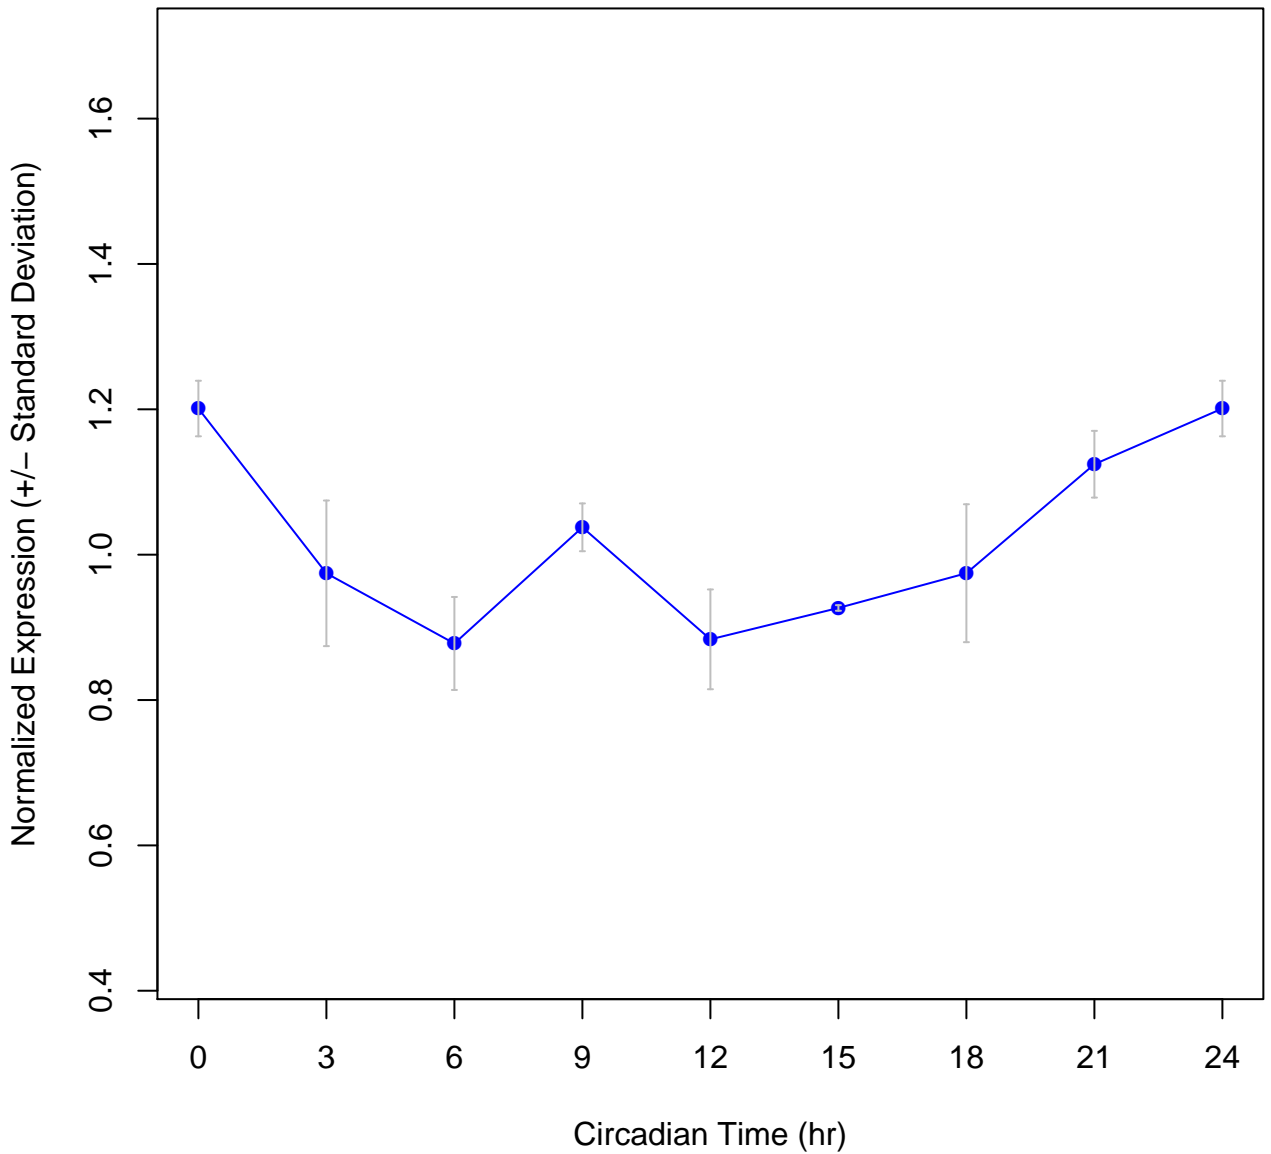

Supplement Figure 4 ncor1

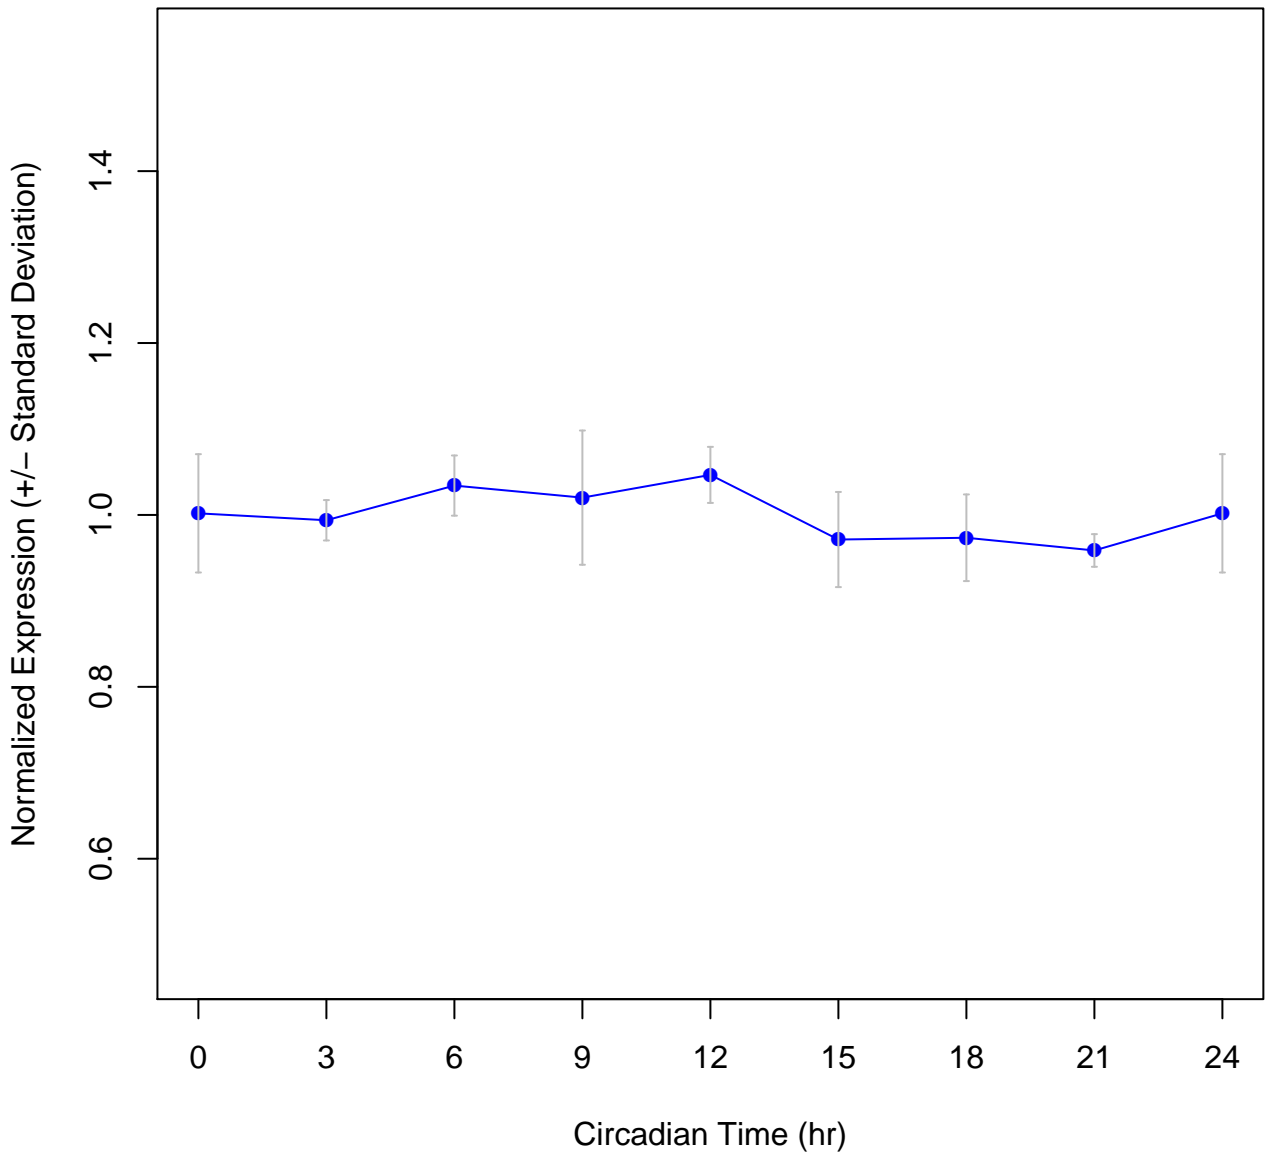

Supplement Figure 4 ncor2

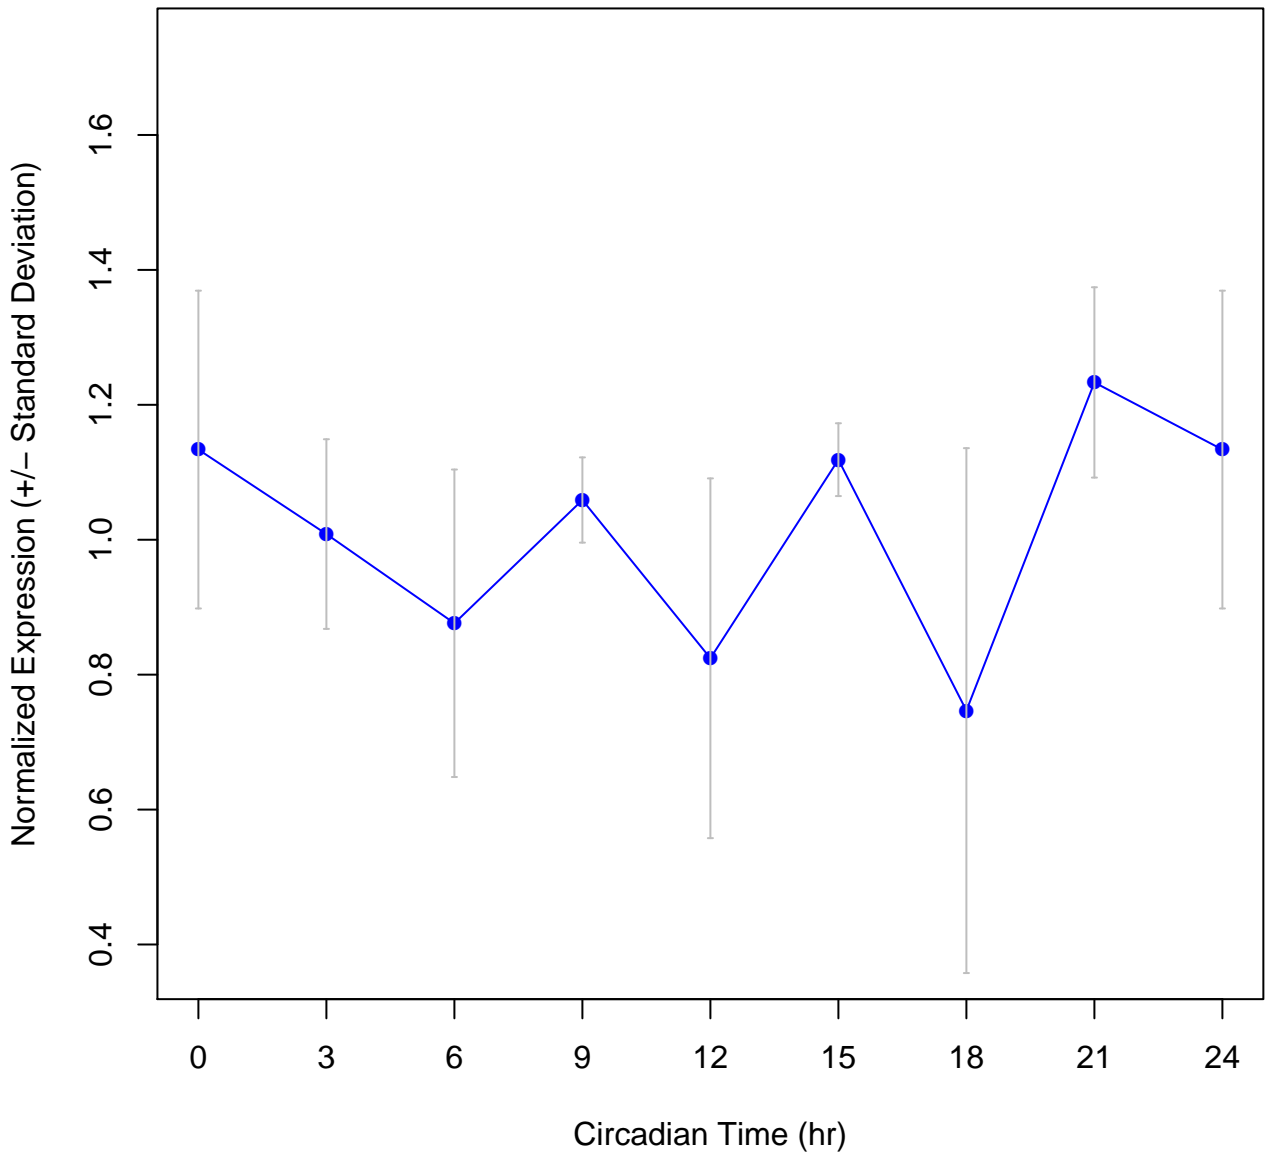

Supplement Figure 4 nos2

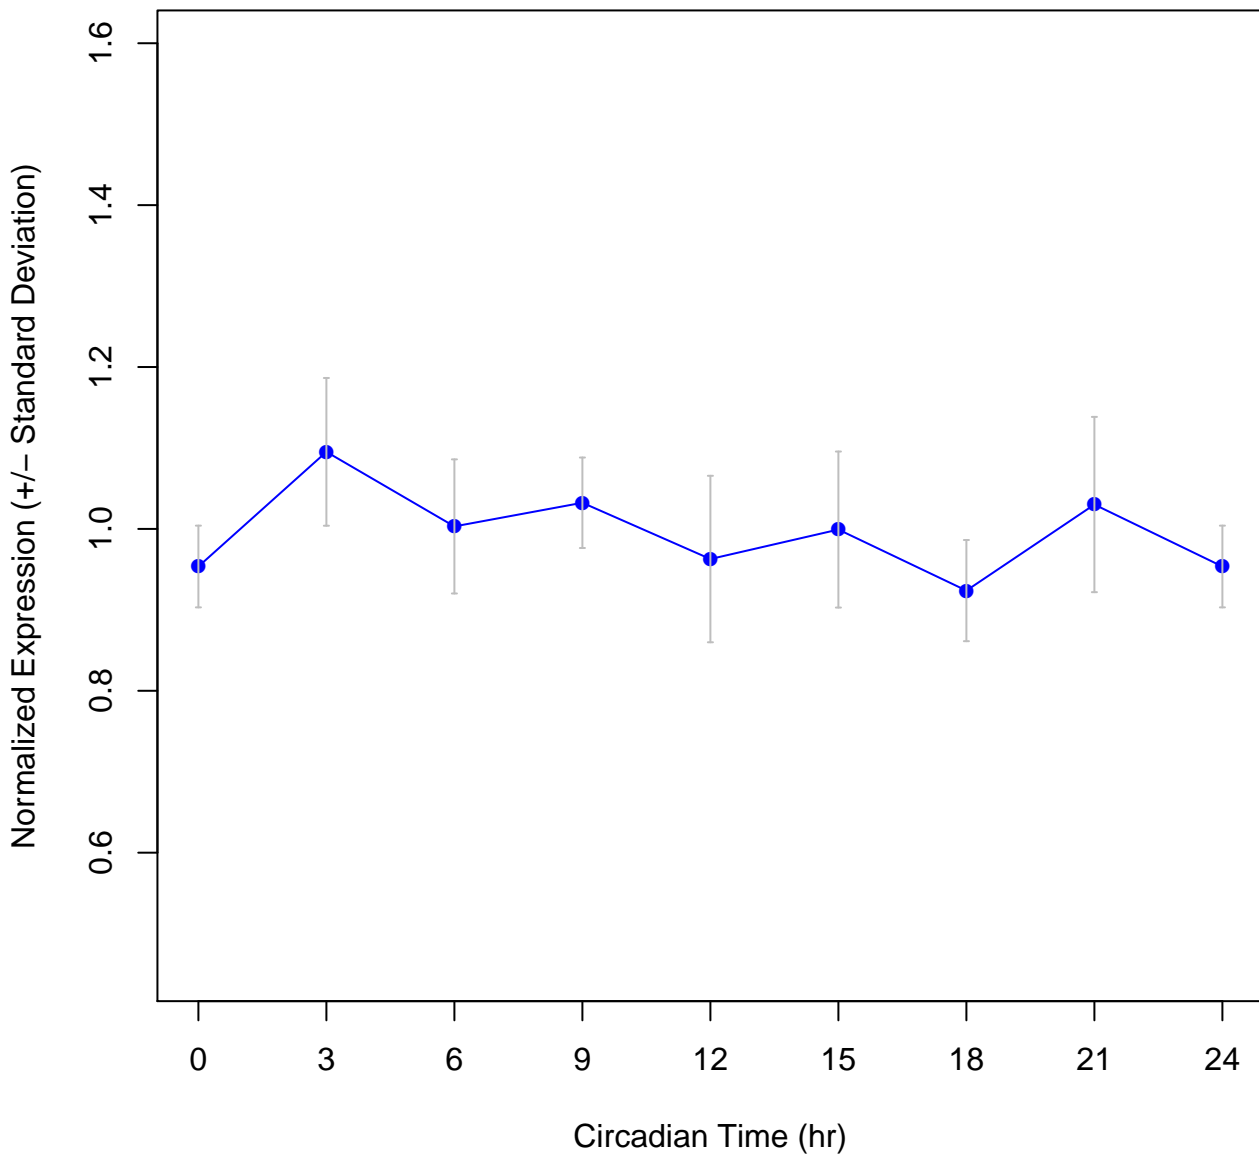

**Supplement Figure 4 nr1d1**

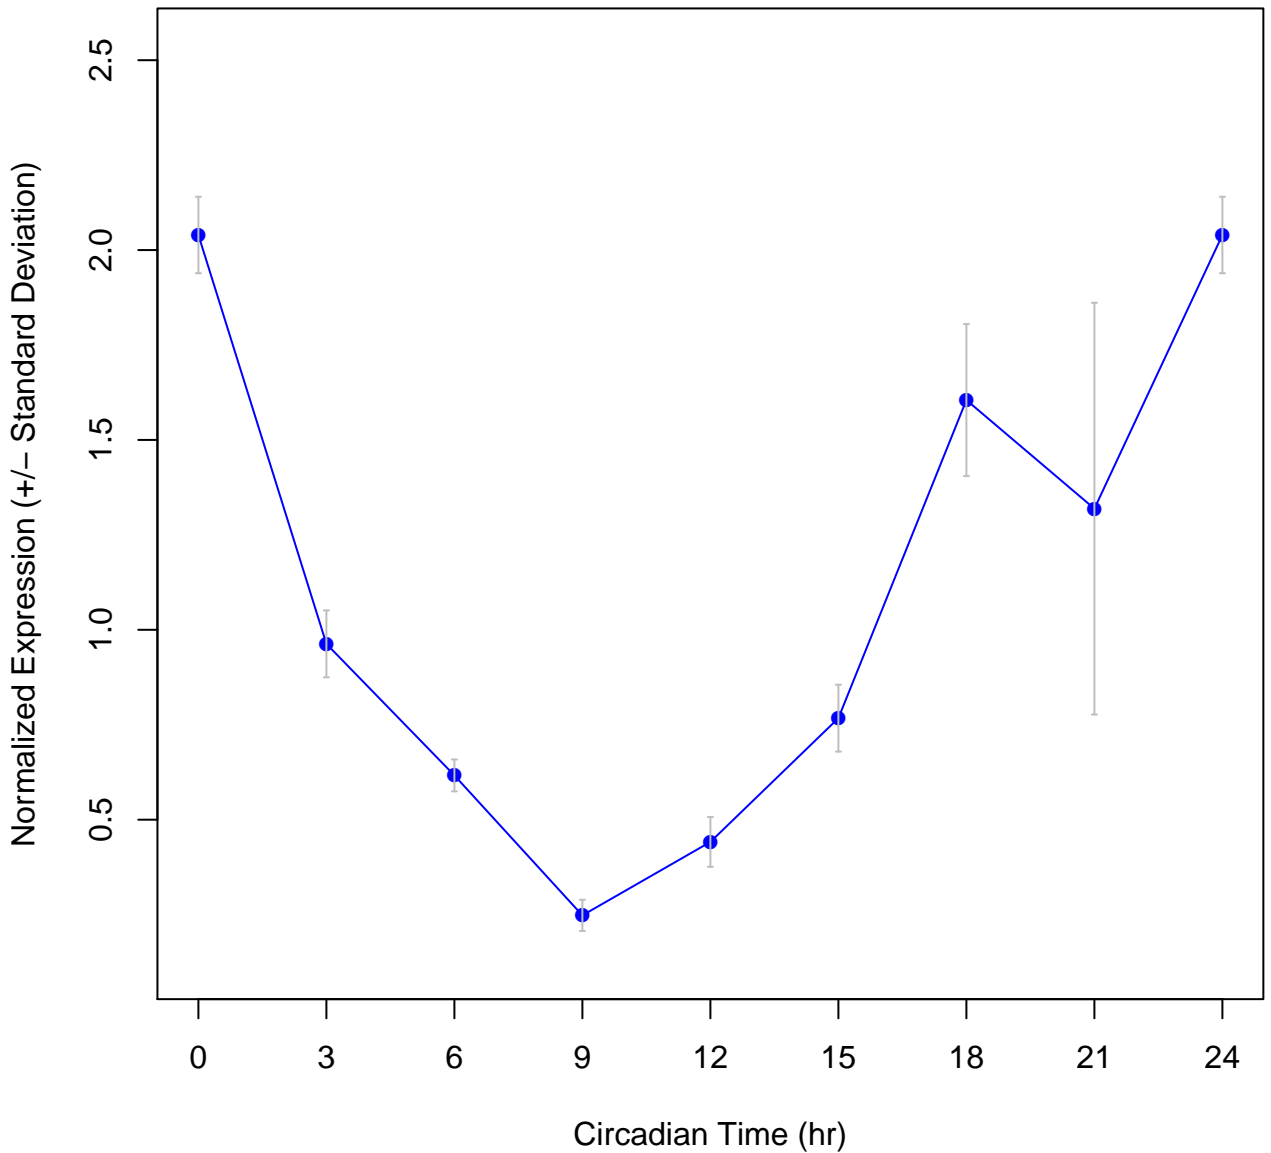

Supplement Figure 4 nr1d2

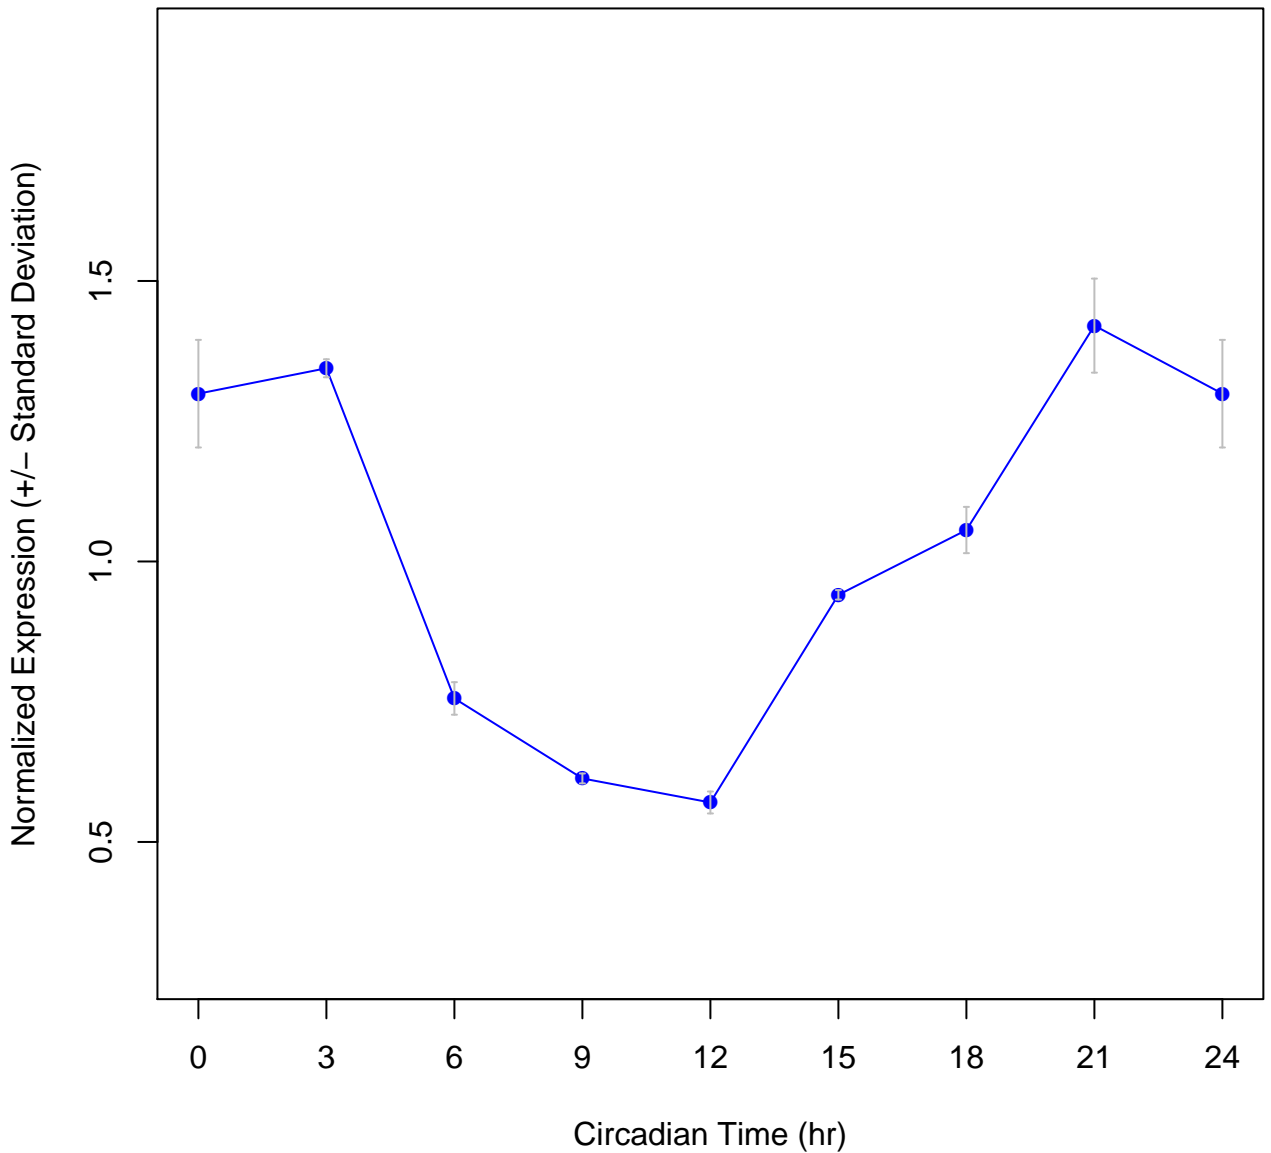



Supplement Figure 4 nr1d4

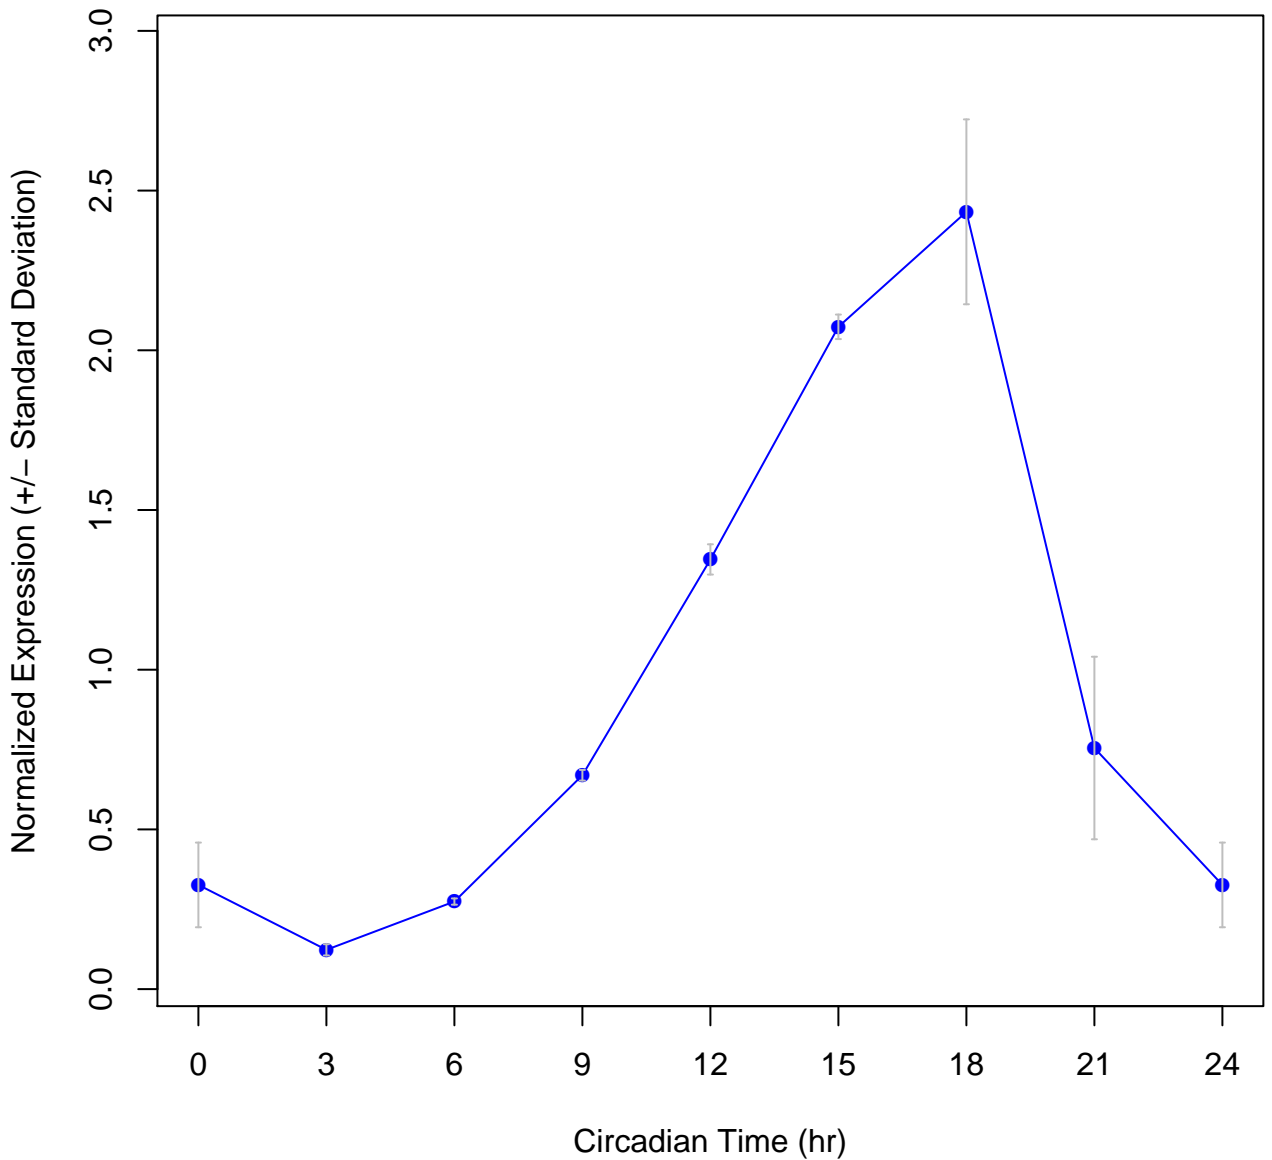

Supplement Figure 4 numa1

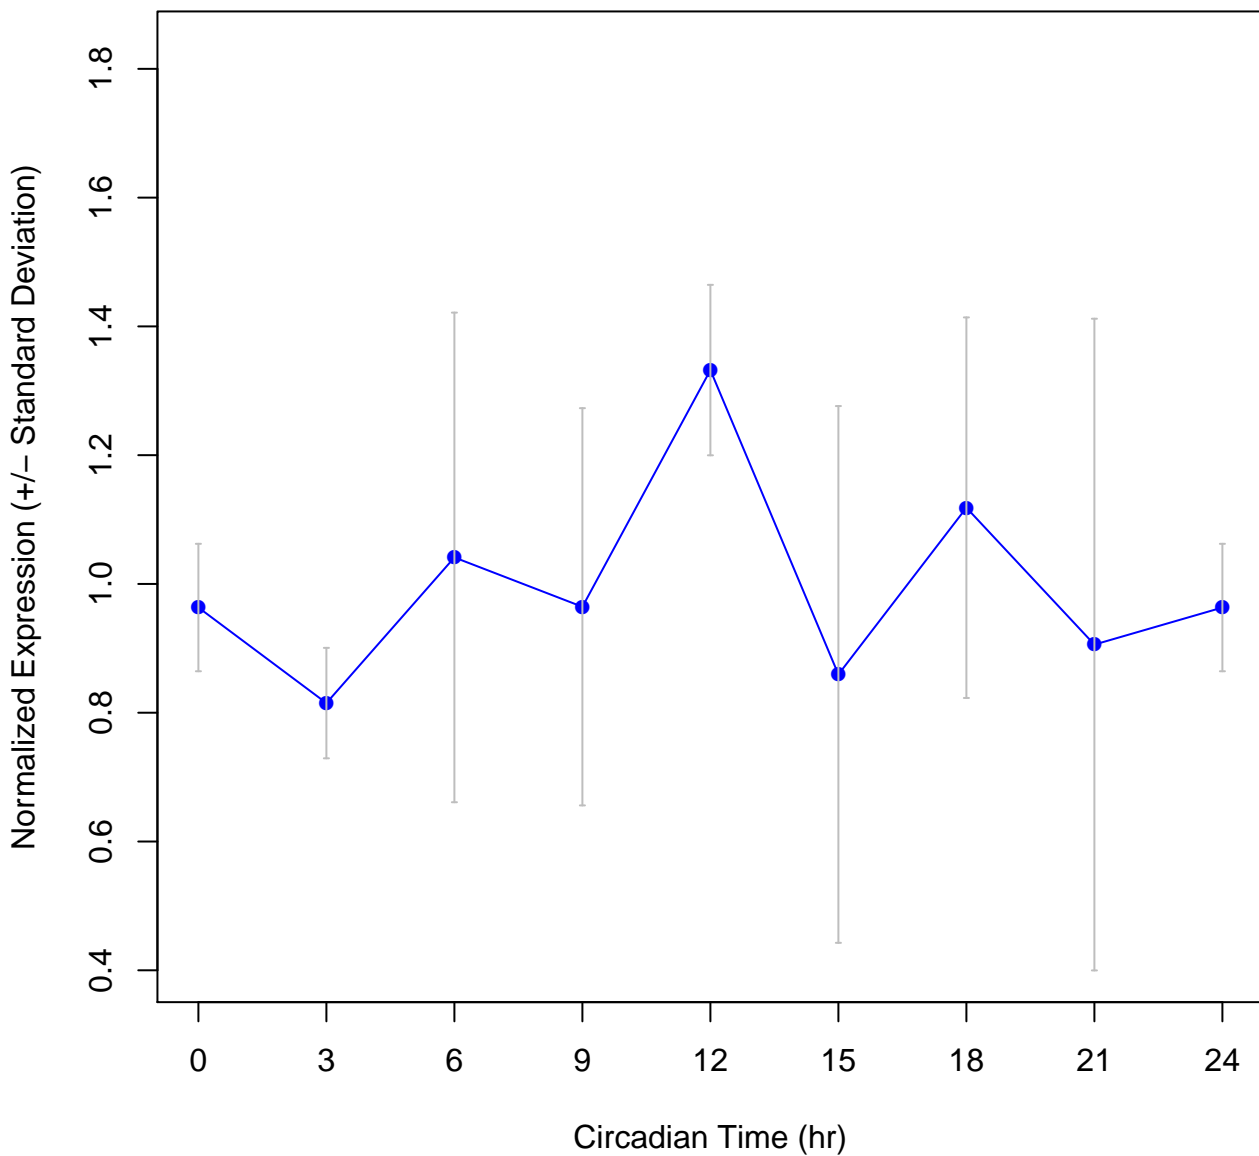

Supplement Figure 4 opn1sw

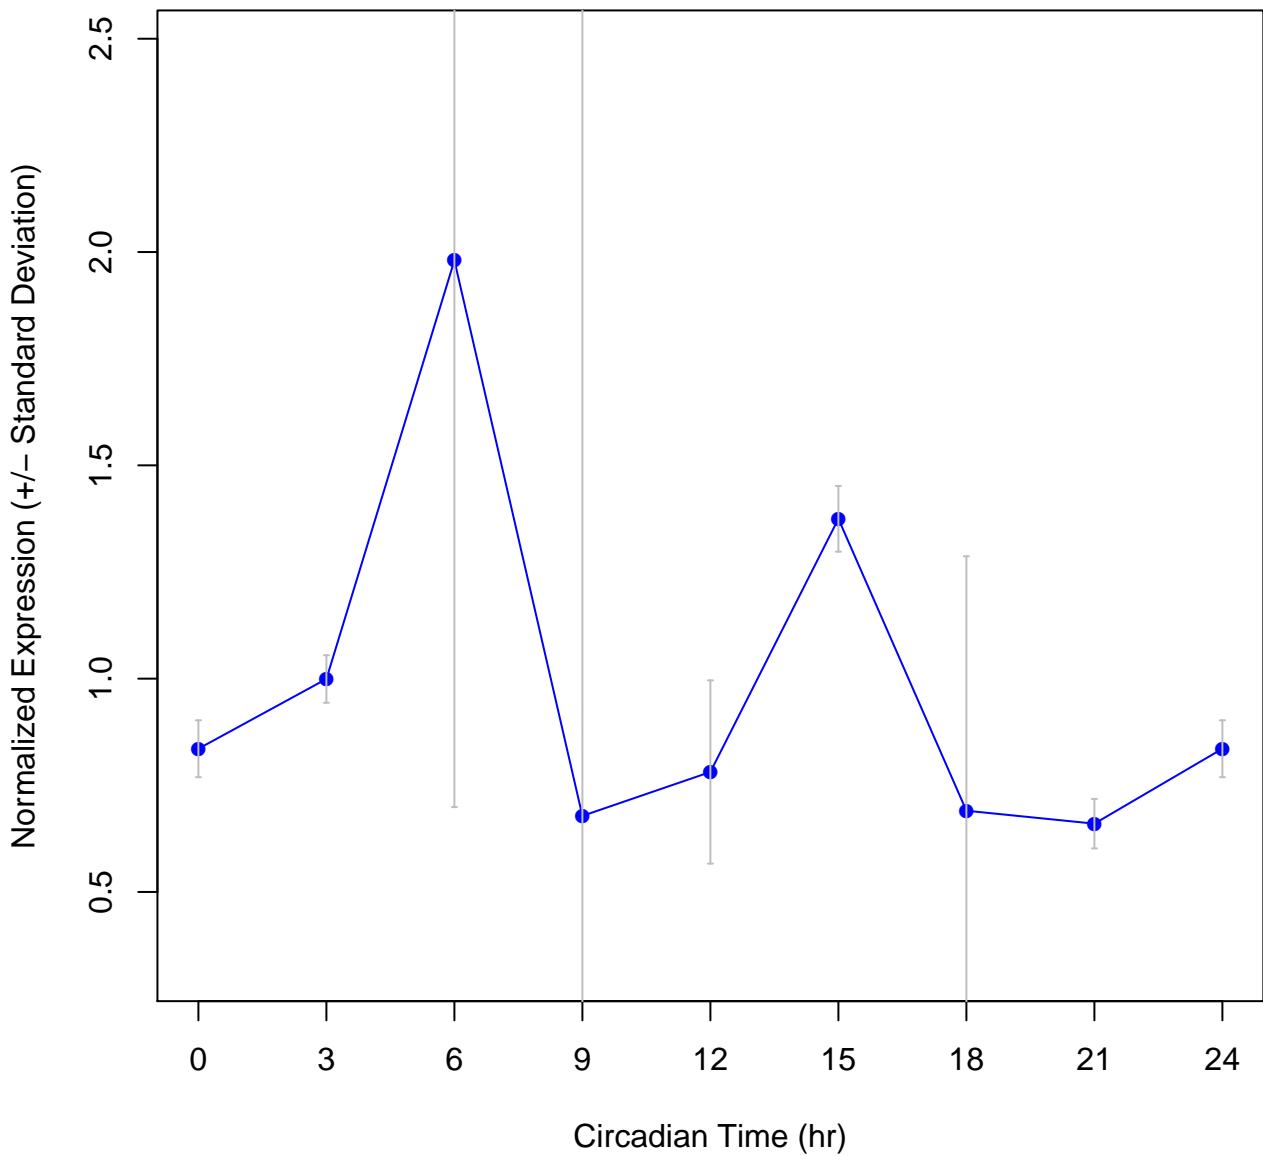

## Supplement Figure 4 pacap

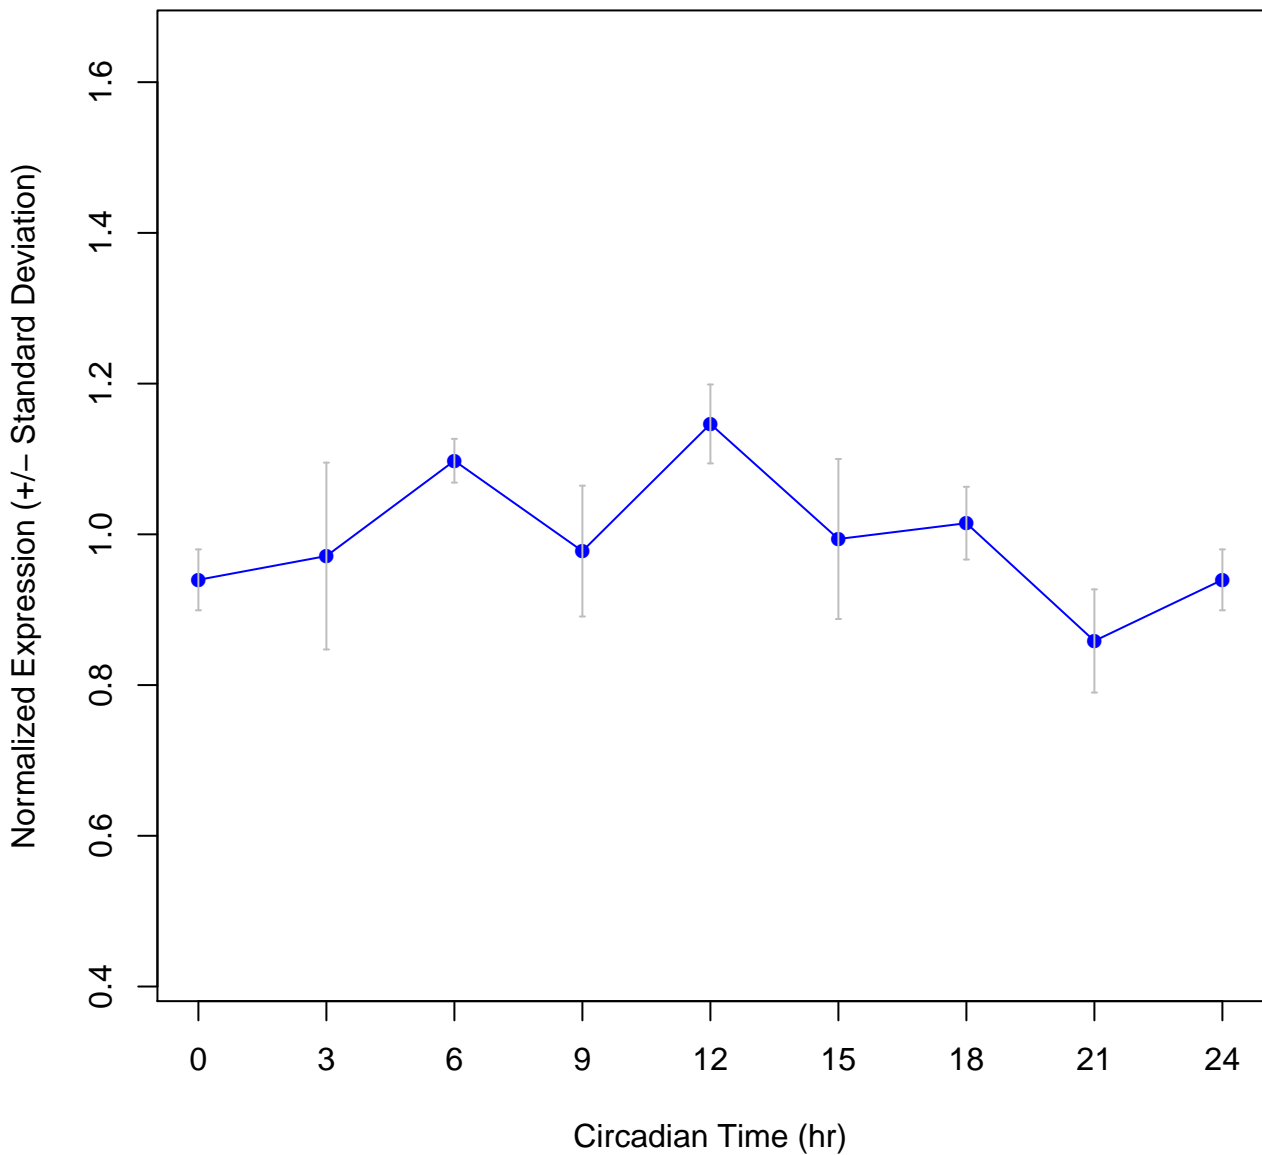

Supplement Figure 4 parpbp

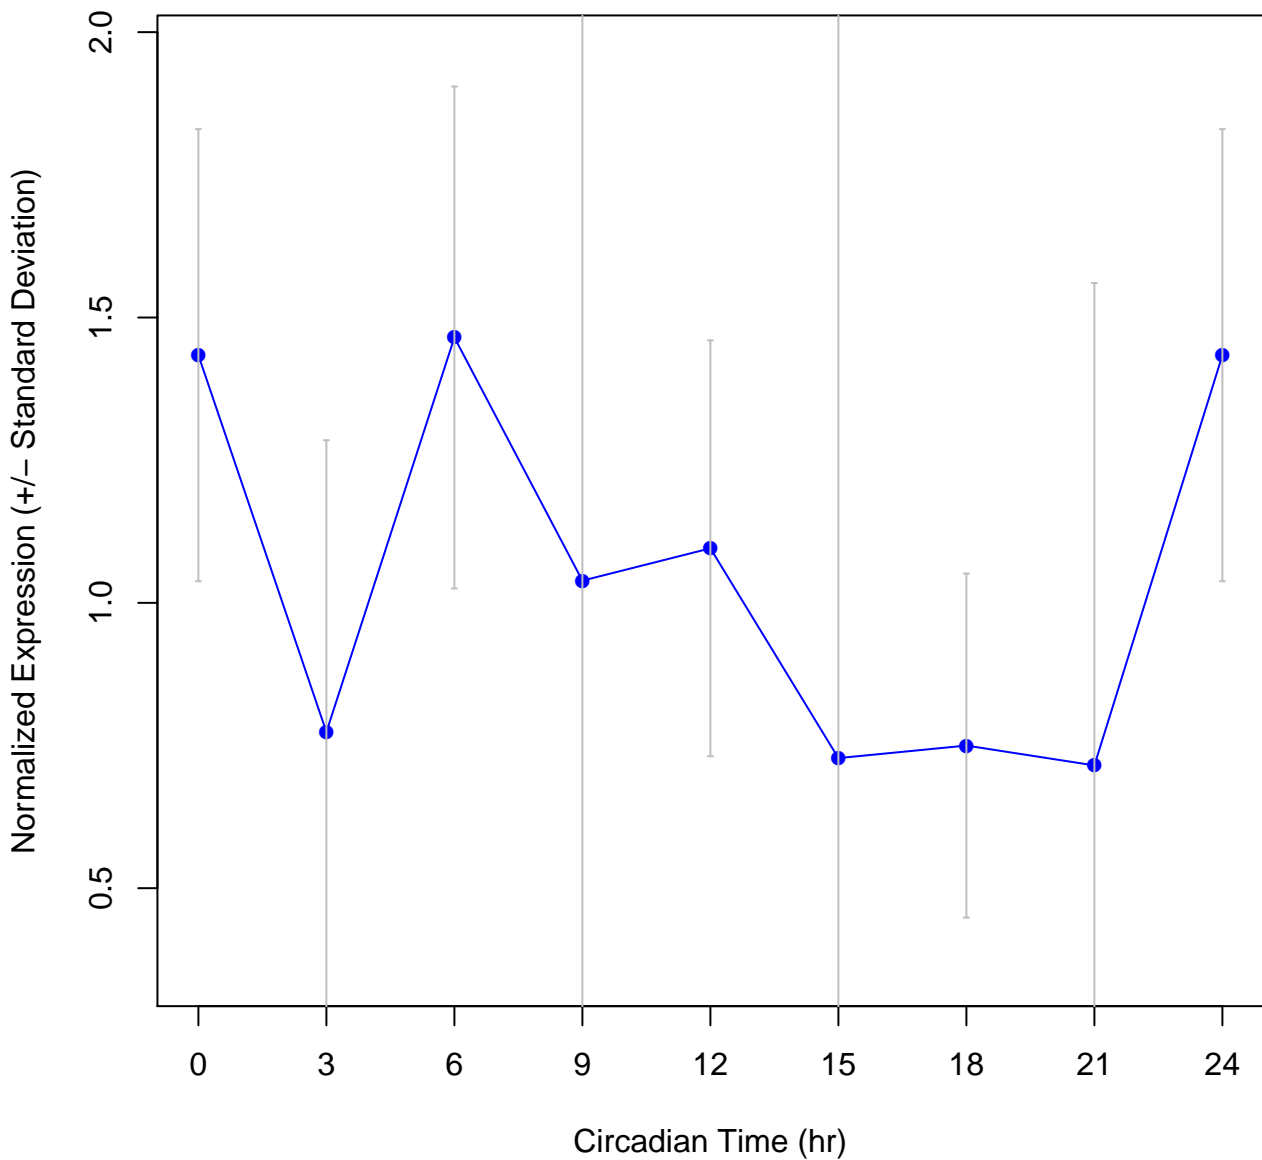

Supplement Figure 4 pcna

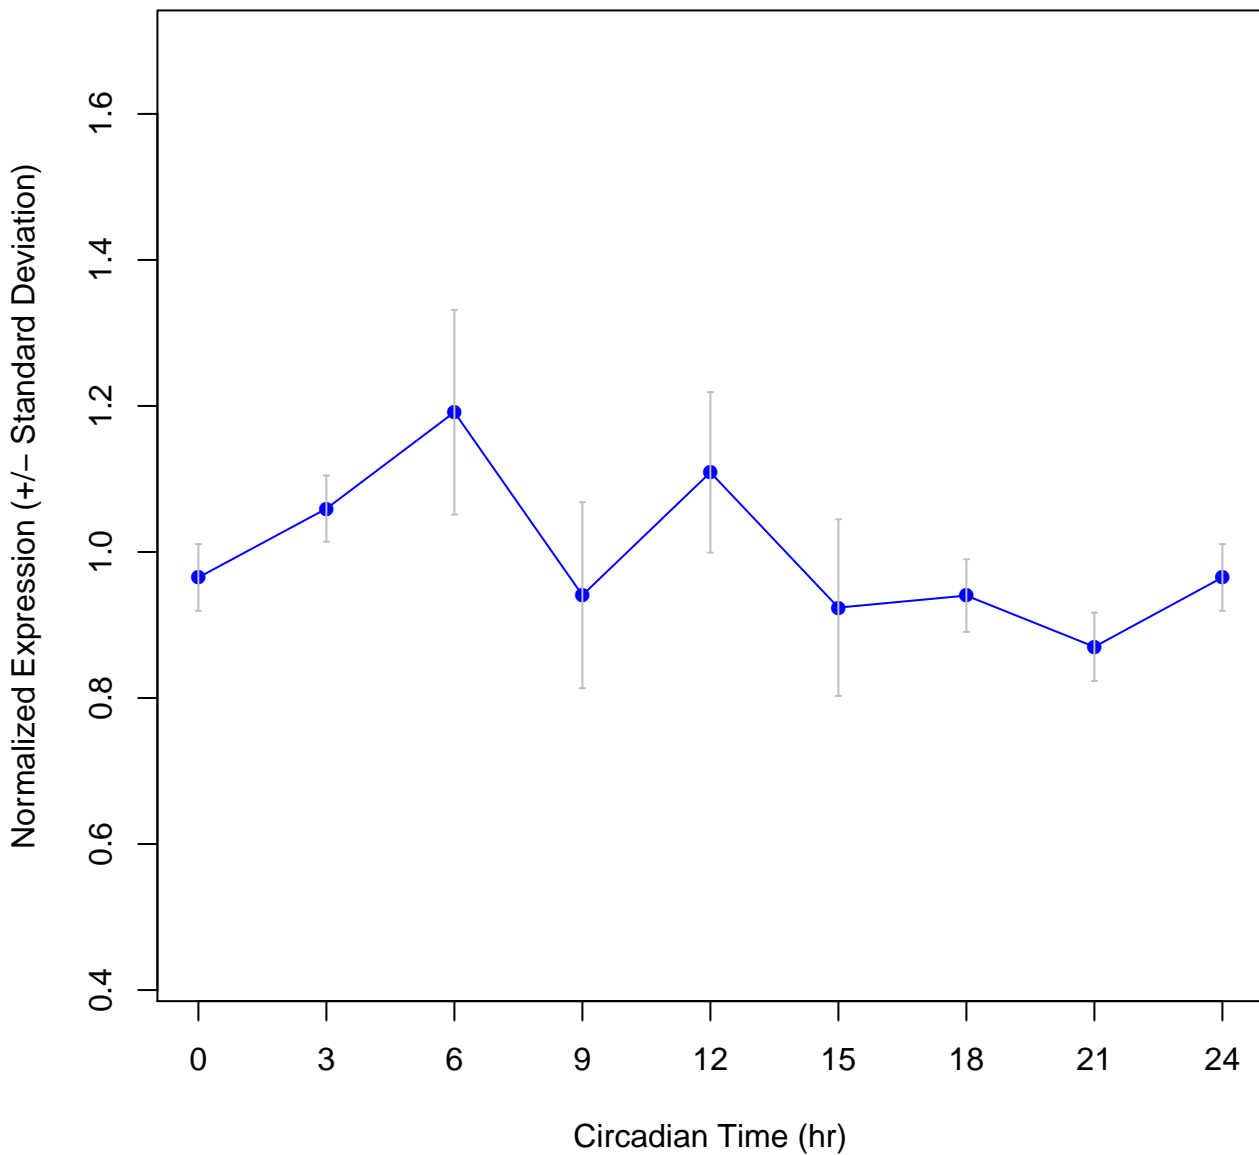

Supplement Figure 4 pcp4

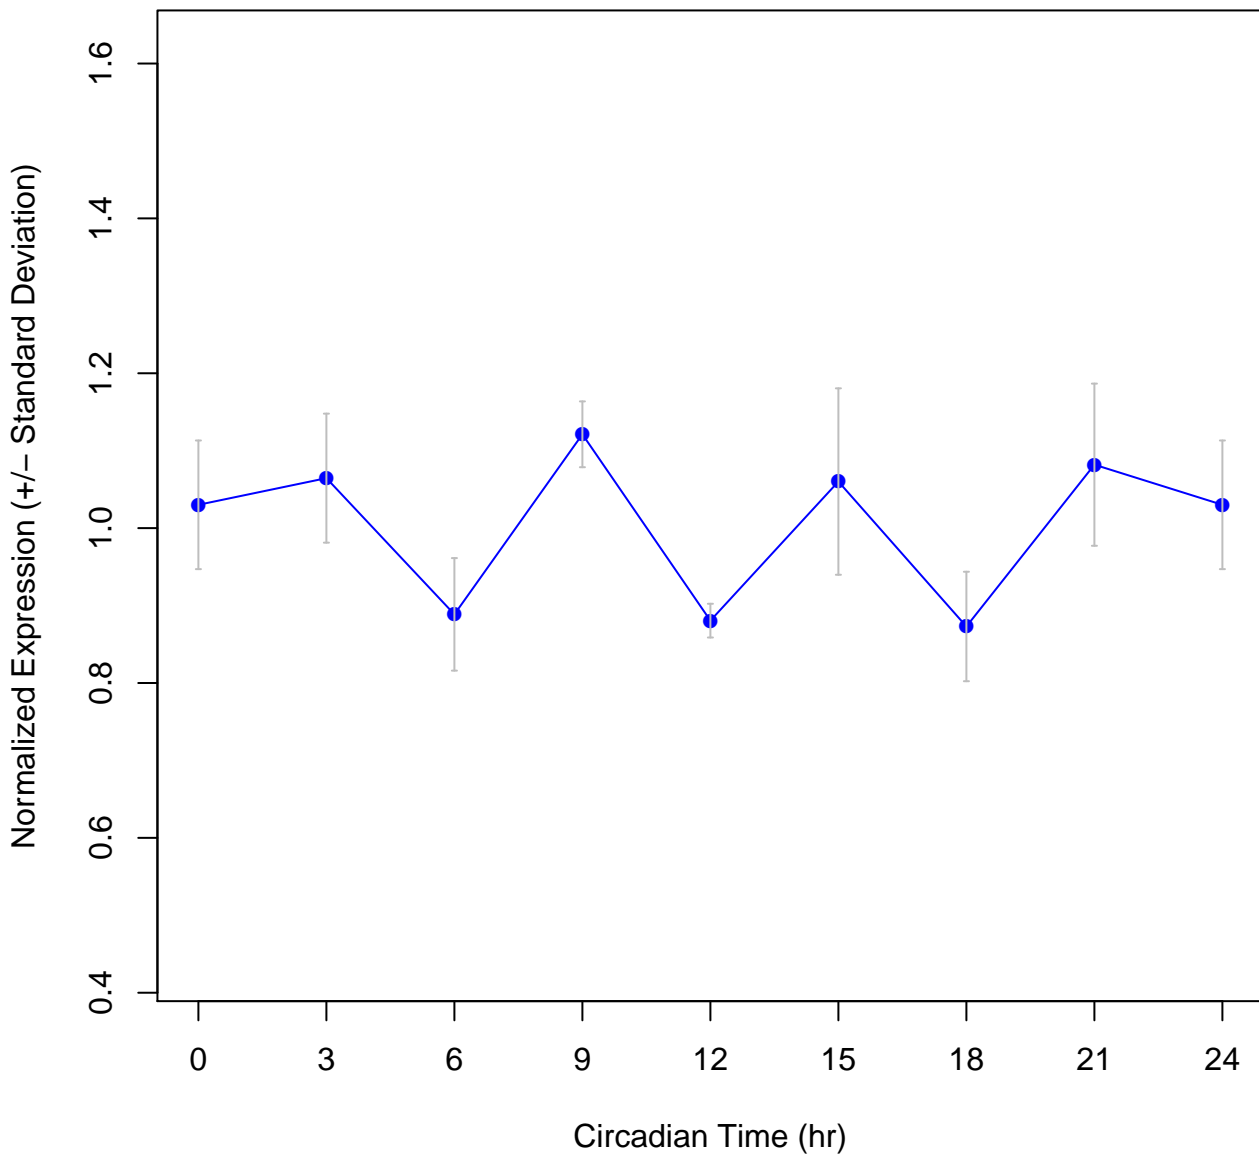

Supplement Figure 4 pdgfc

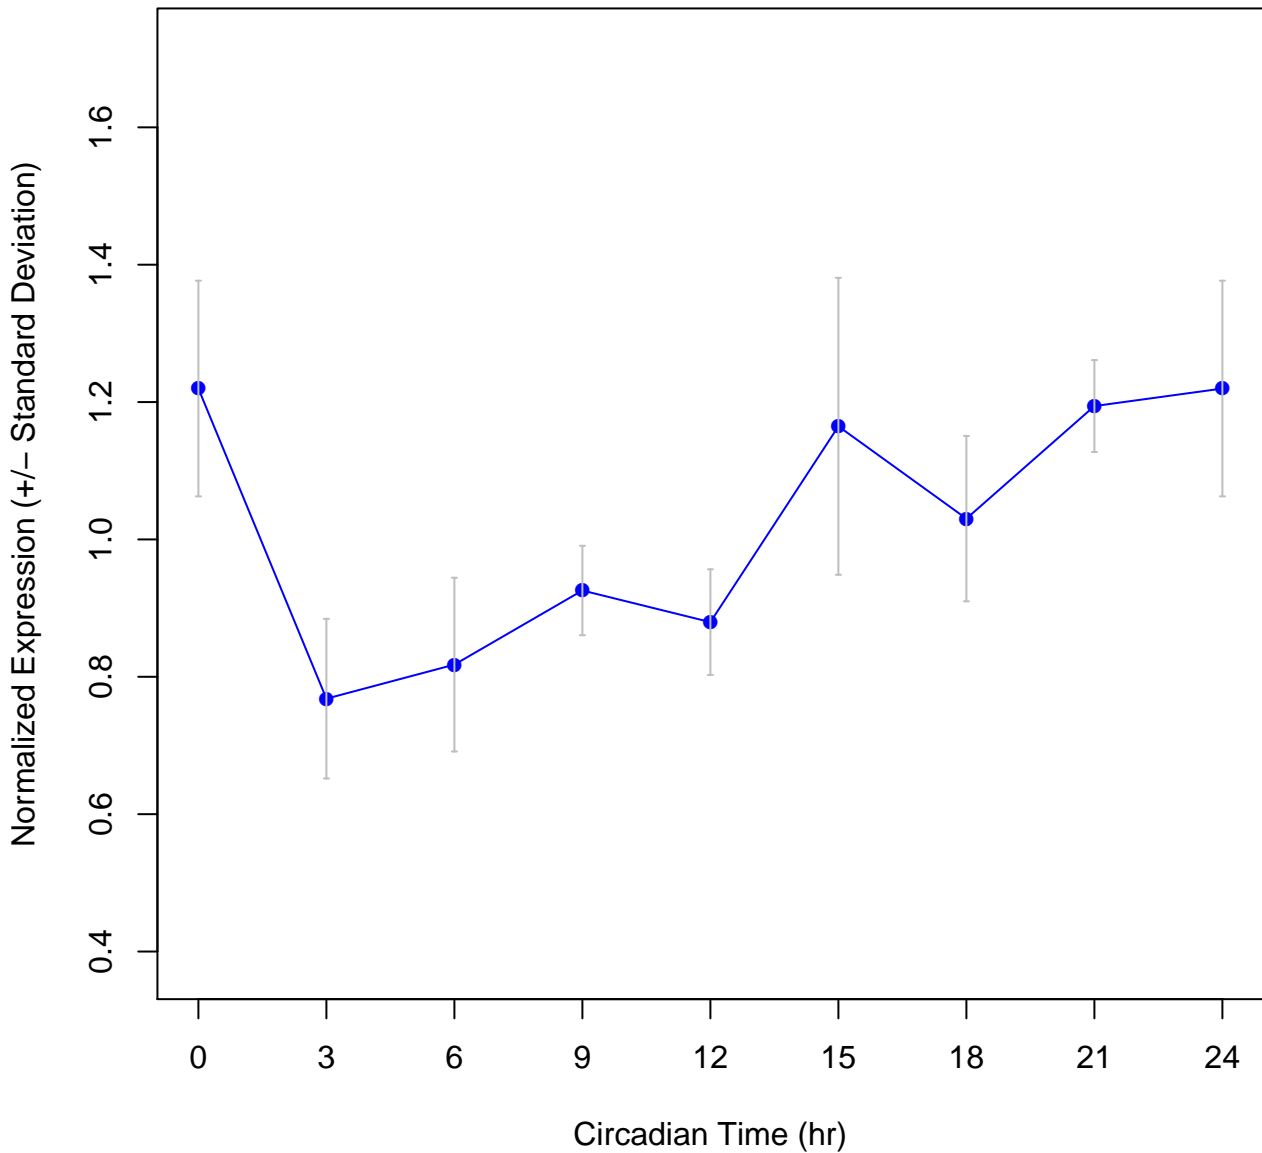



Supplement Figure 4 per1

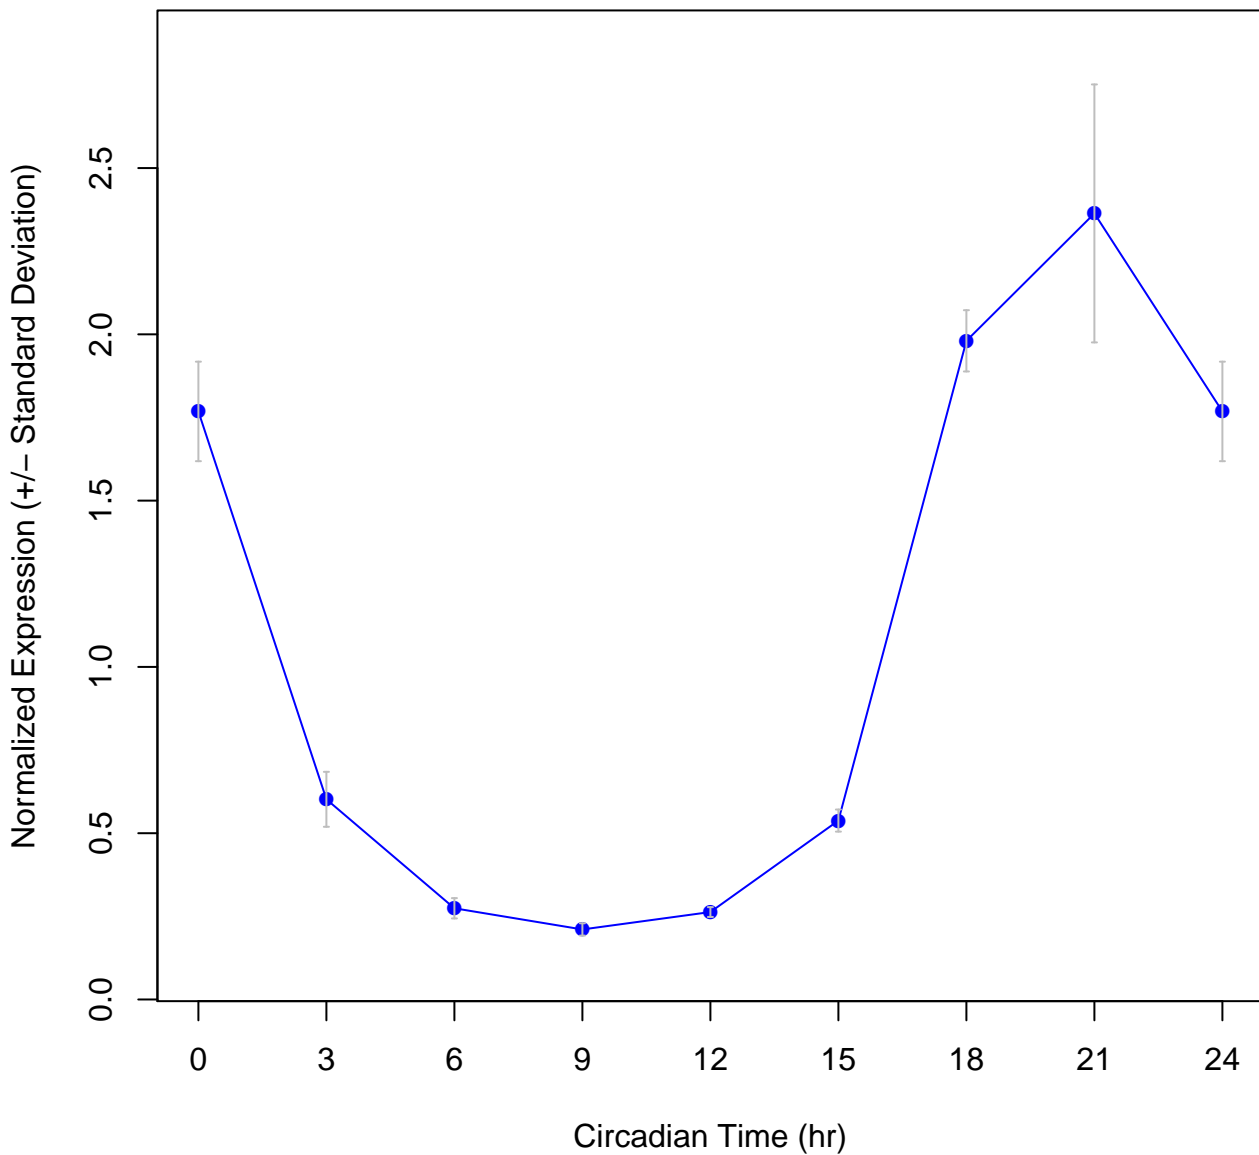

Supplement Figure 4 per2

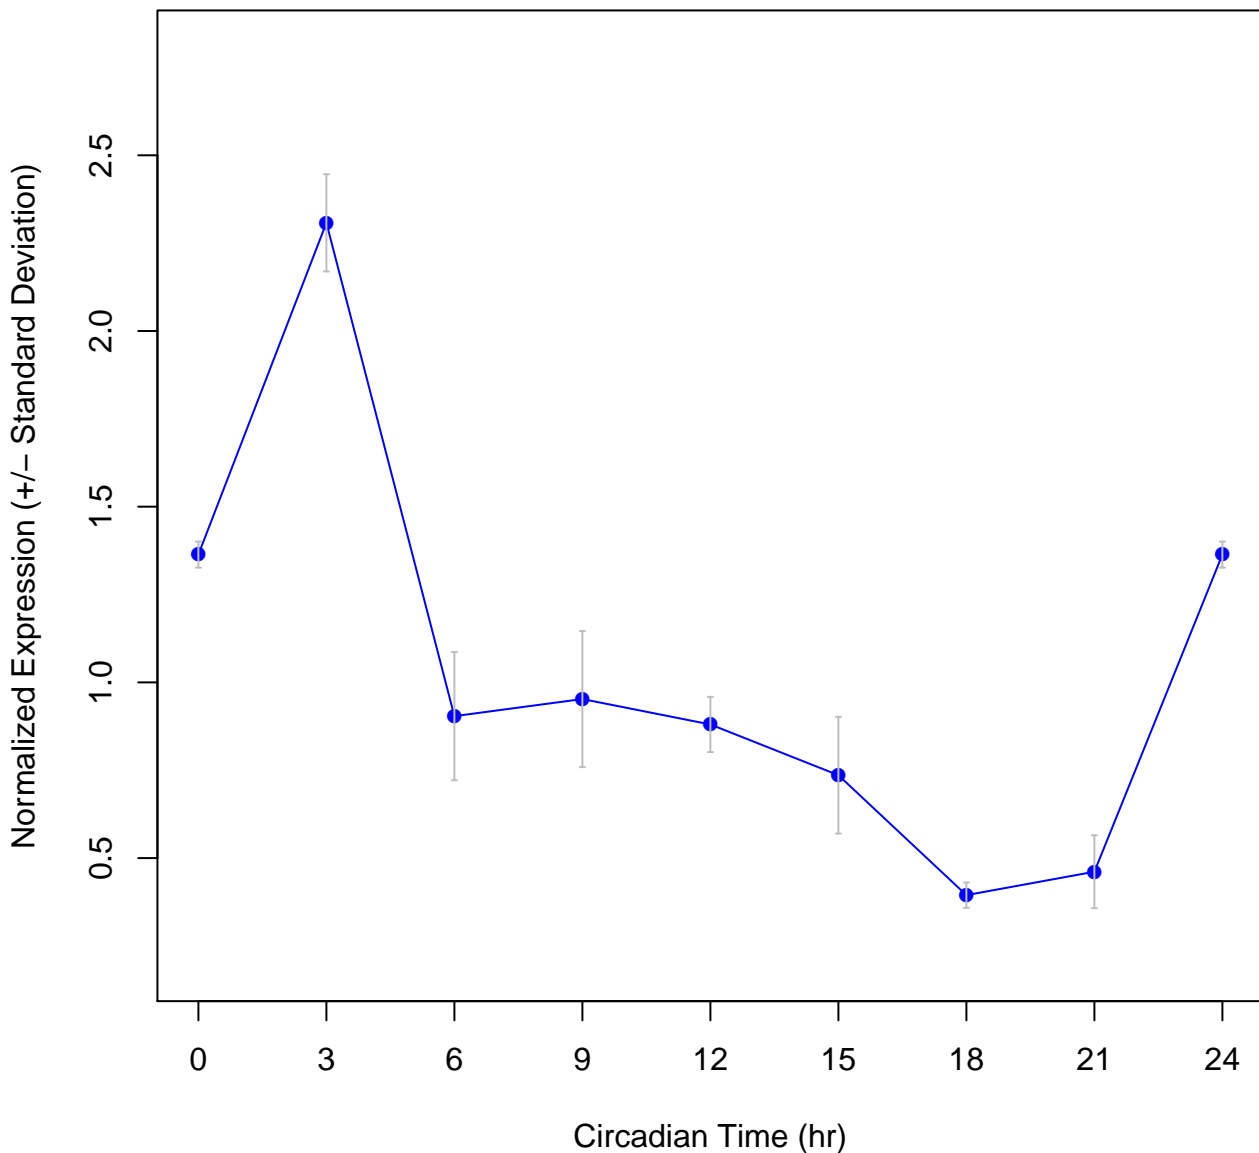

Supplement Figure 4 pfkfb1

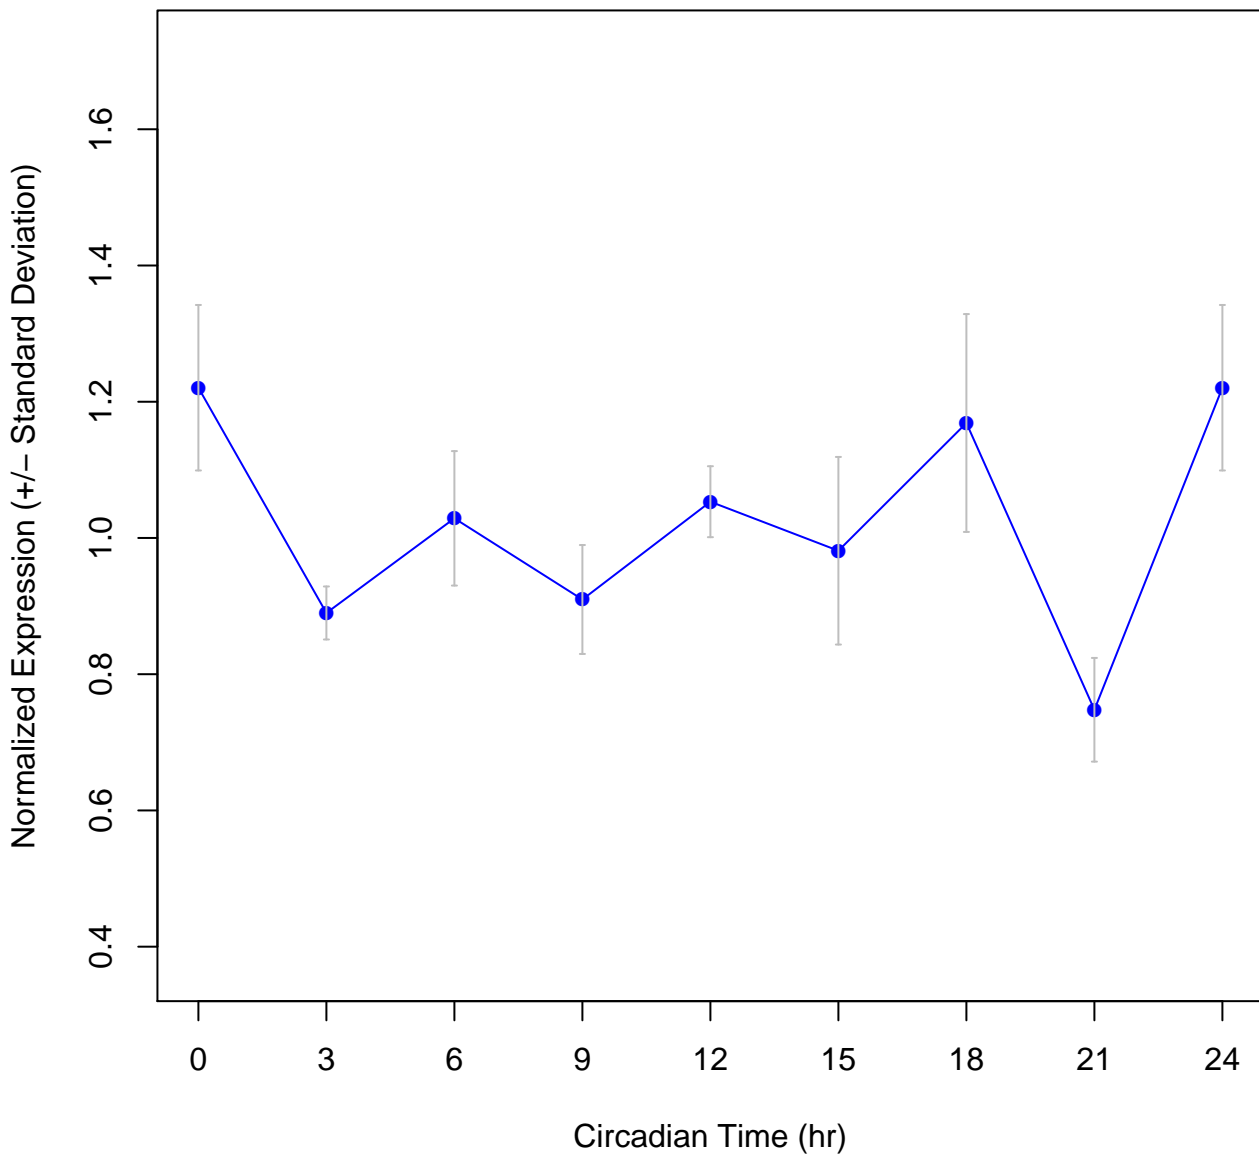

Supplement Figure 4 pif1

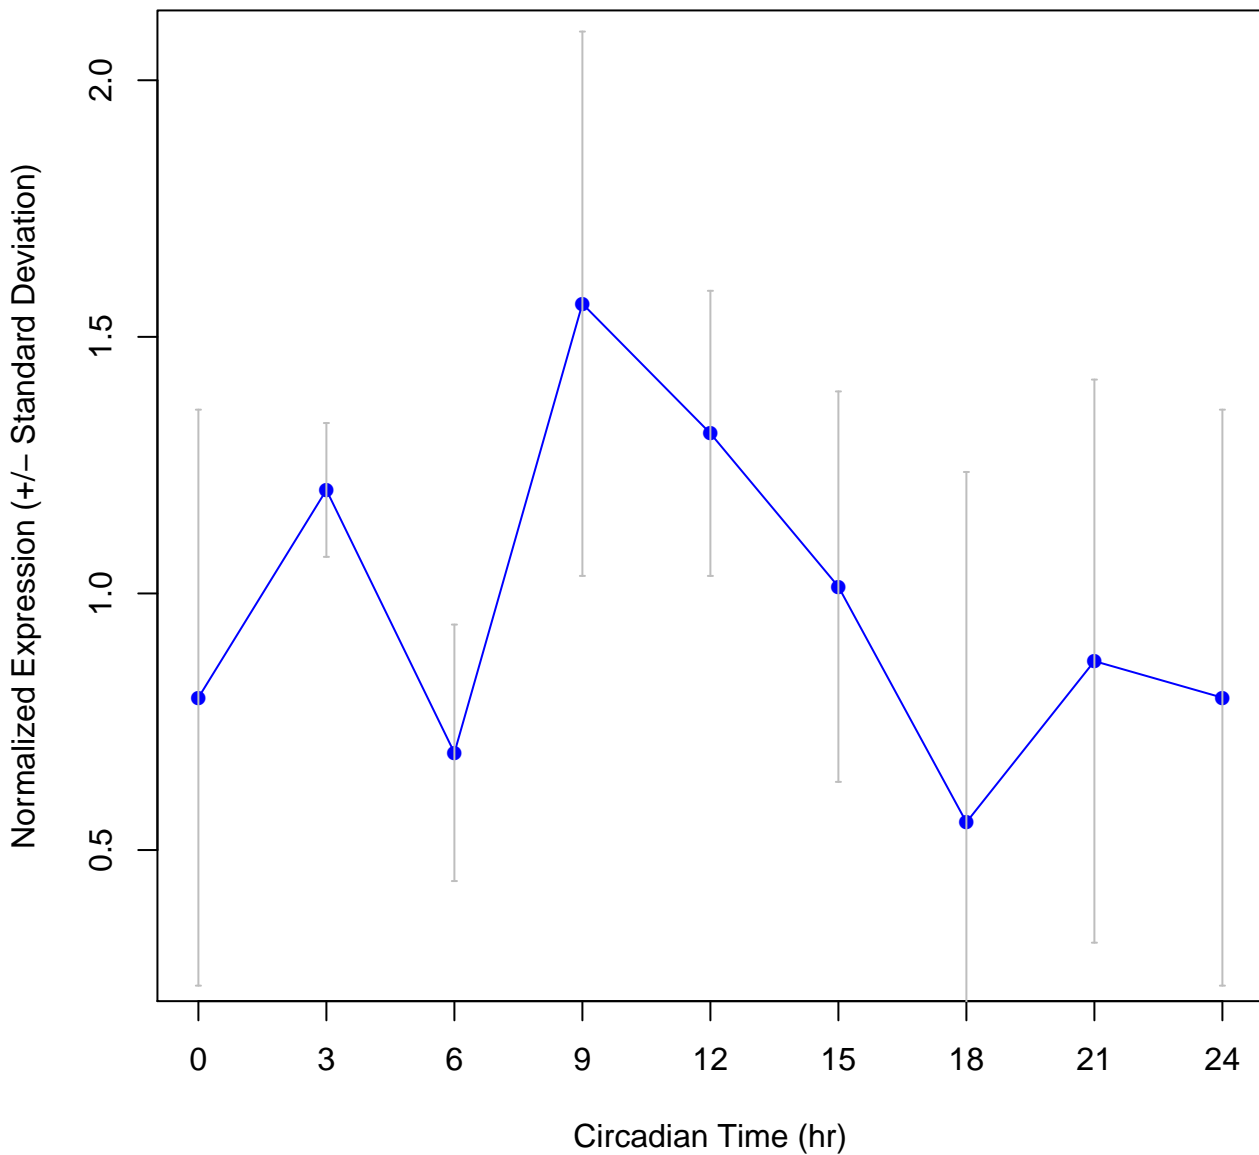

Supplement Figure 4 pik3c2b

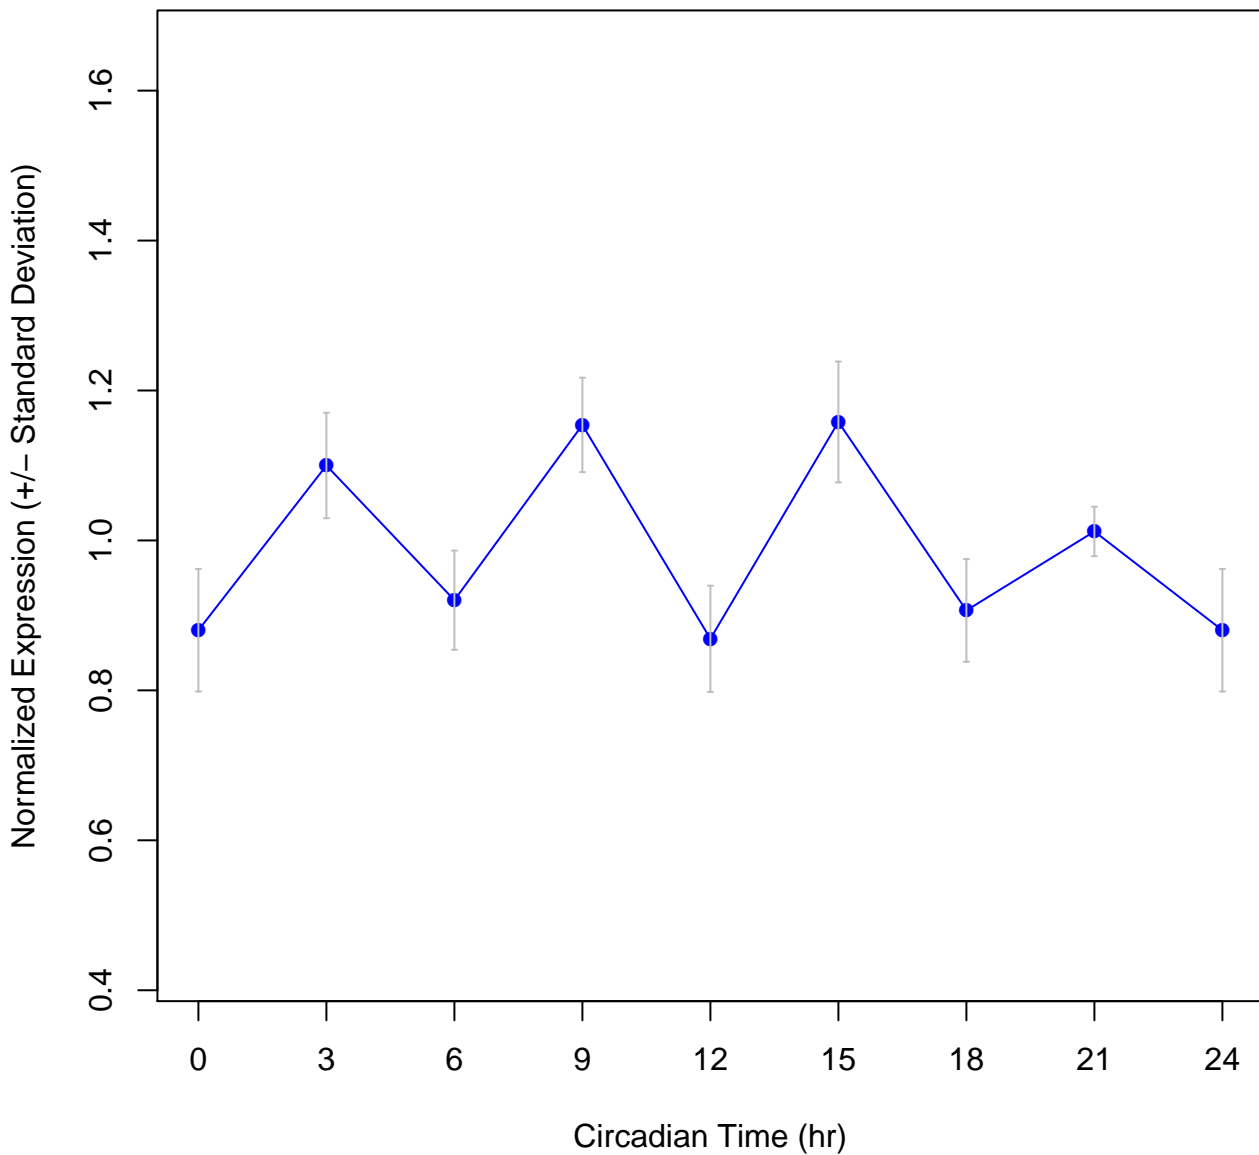

Supplement Figure 4 pkmyt1

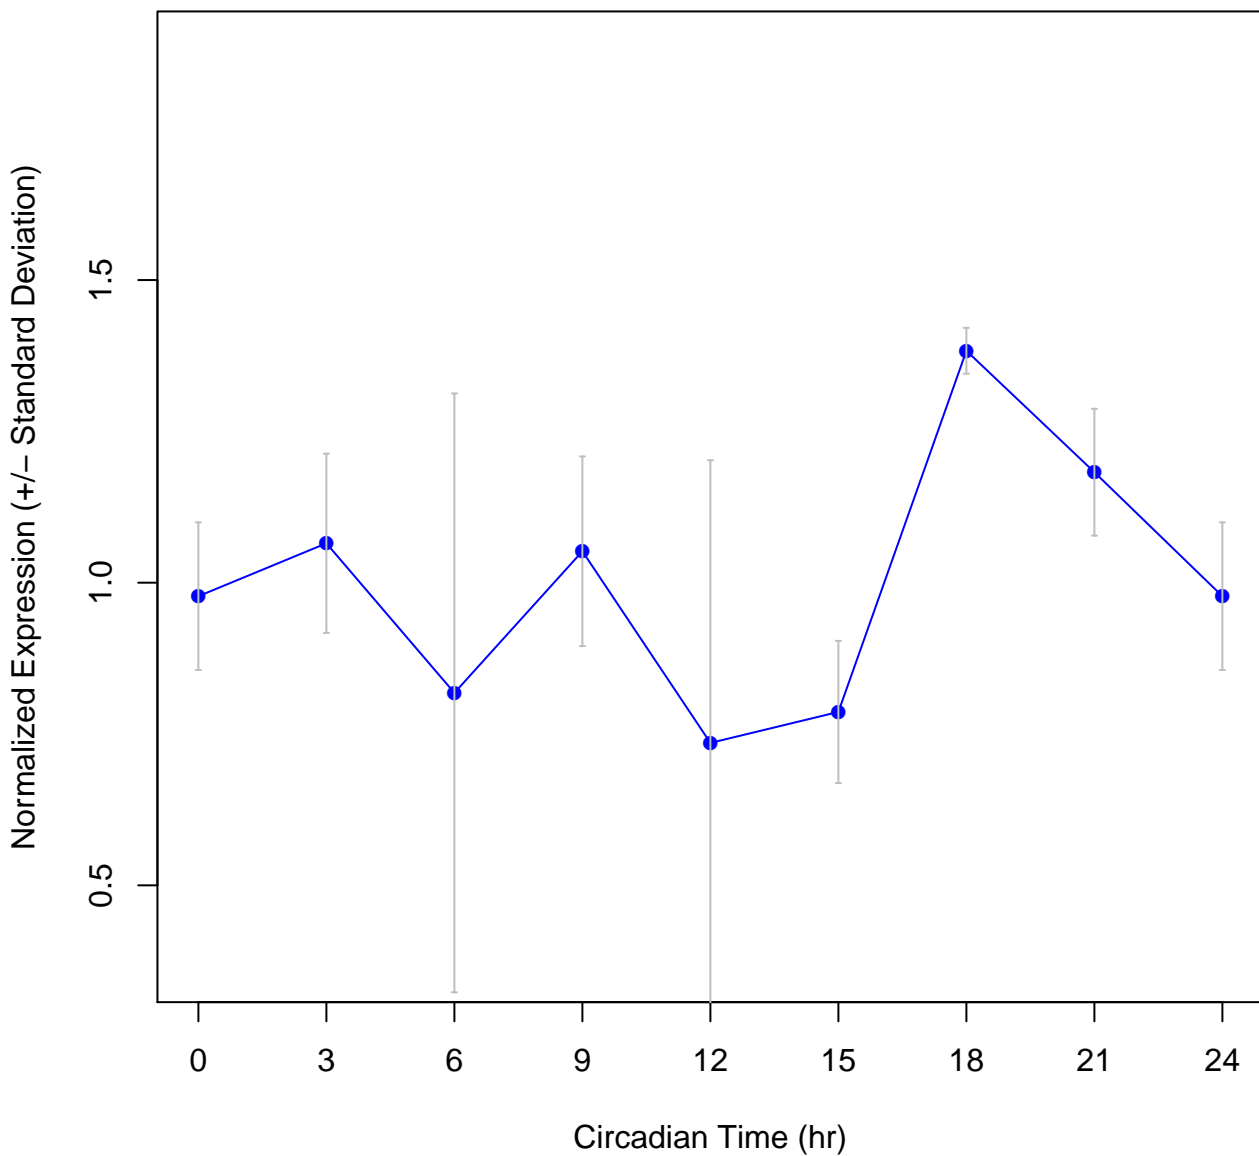

Supplement Figure 4 *plcb1*

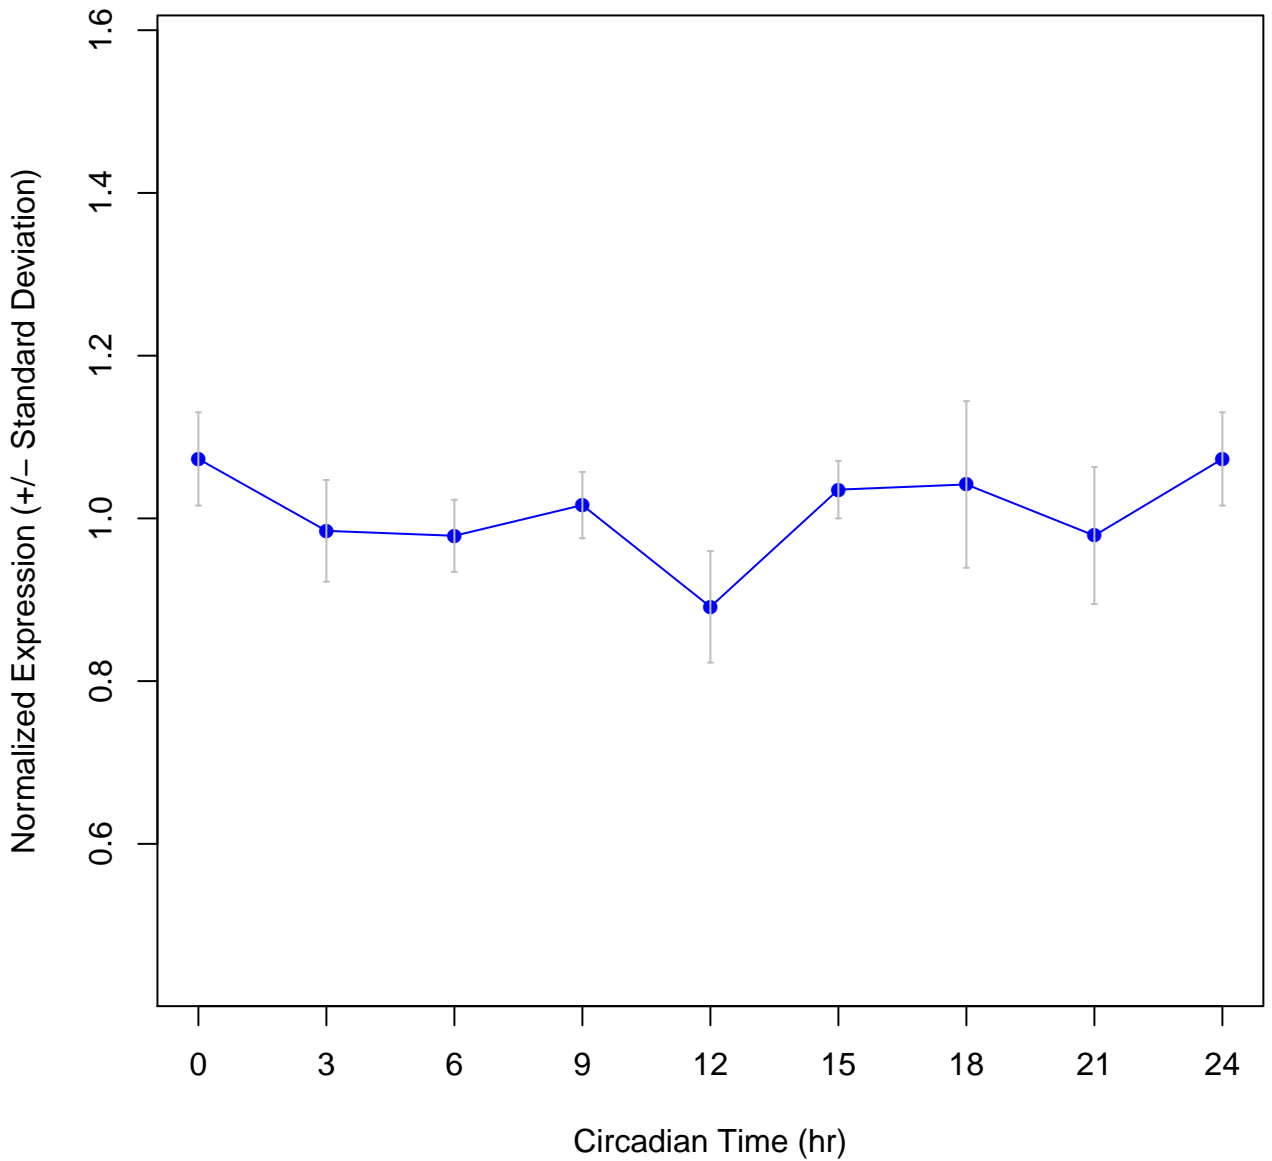

Supplement Figure 4 *plcd1*

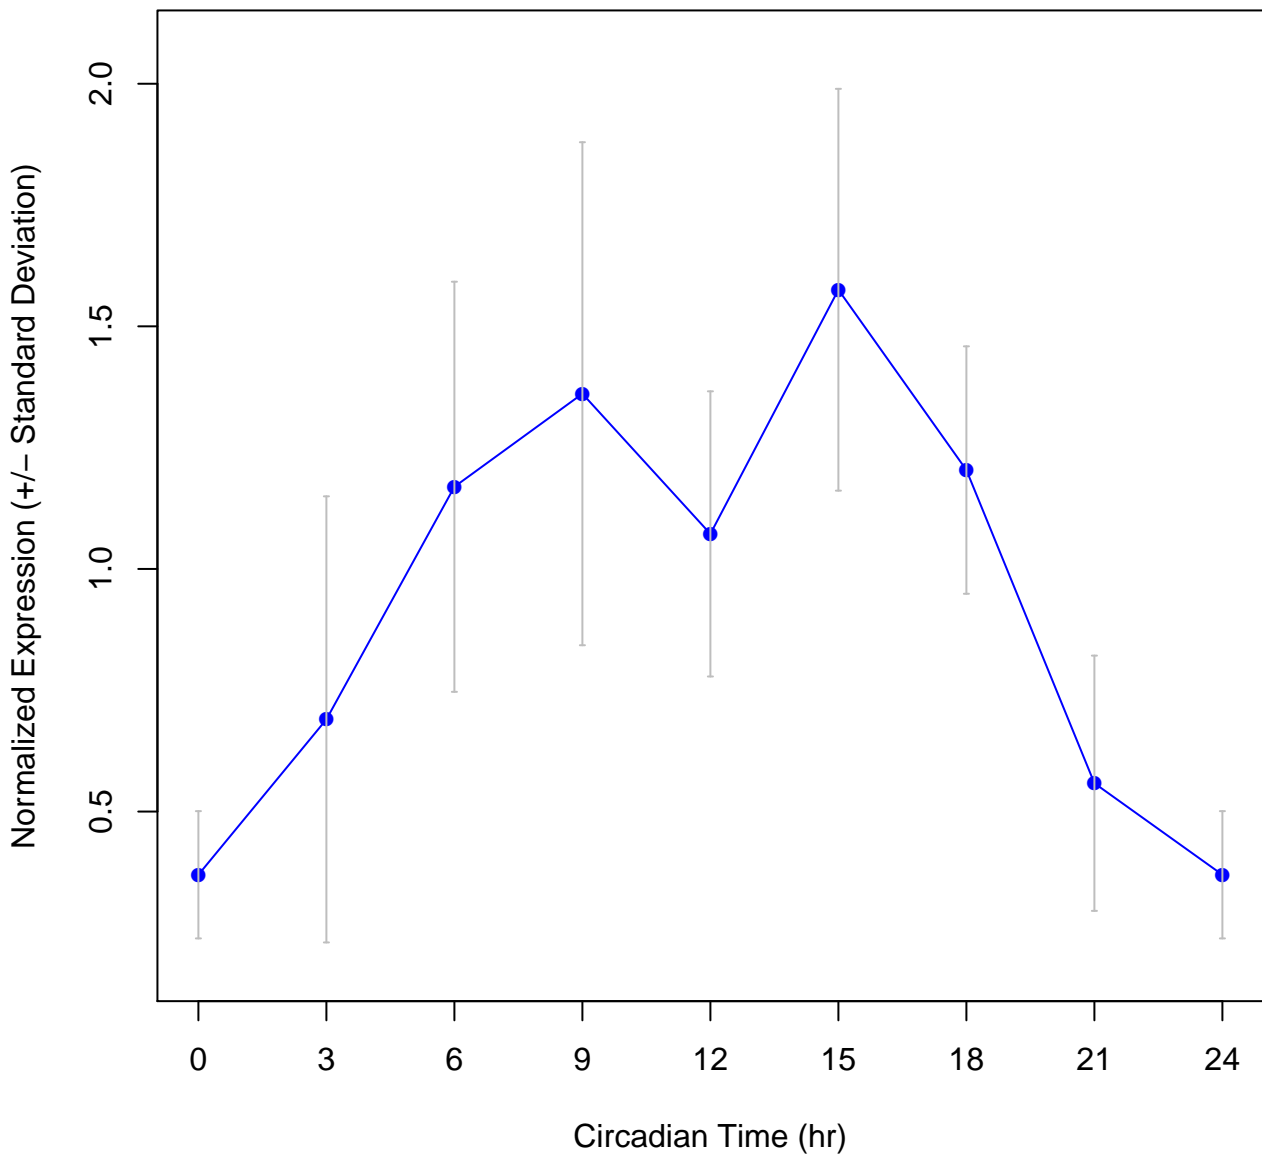



Supplement Figure 4 plch2

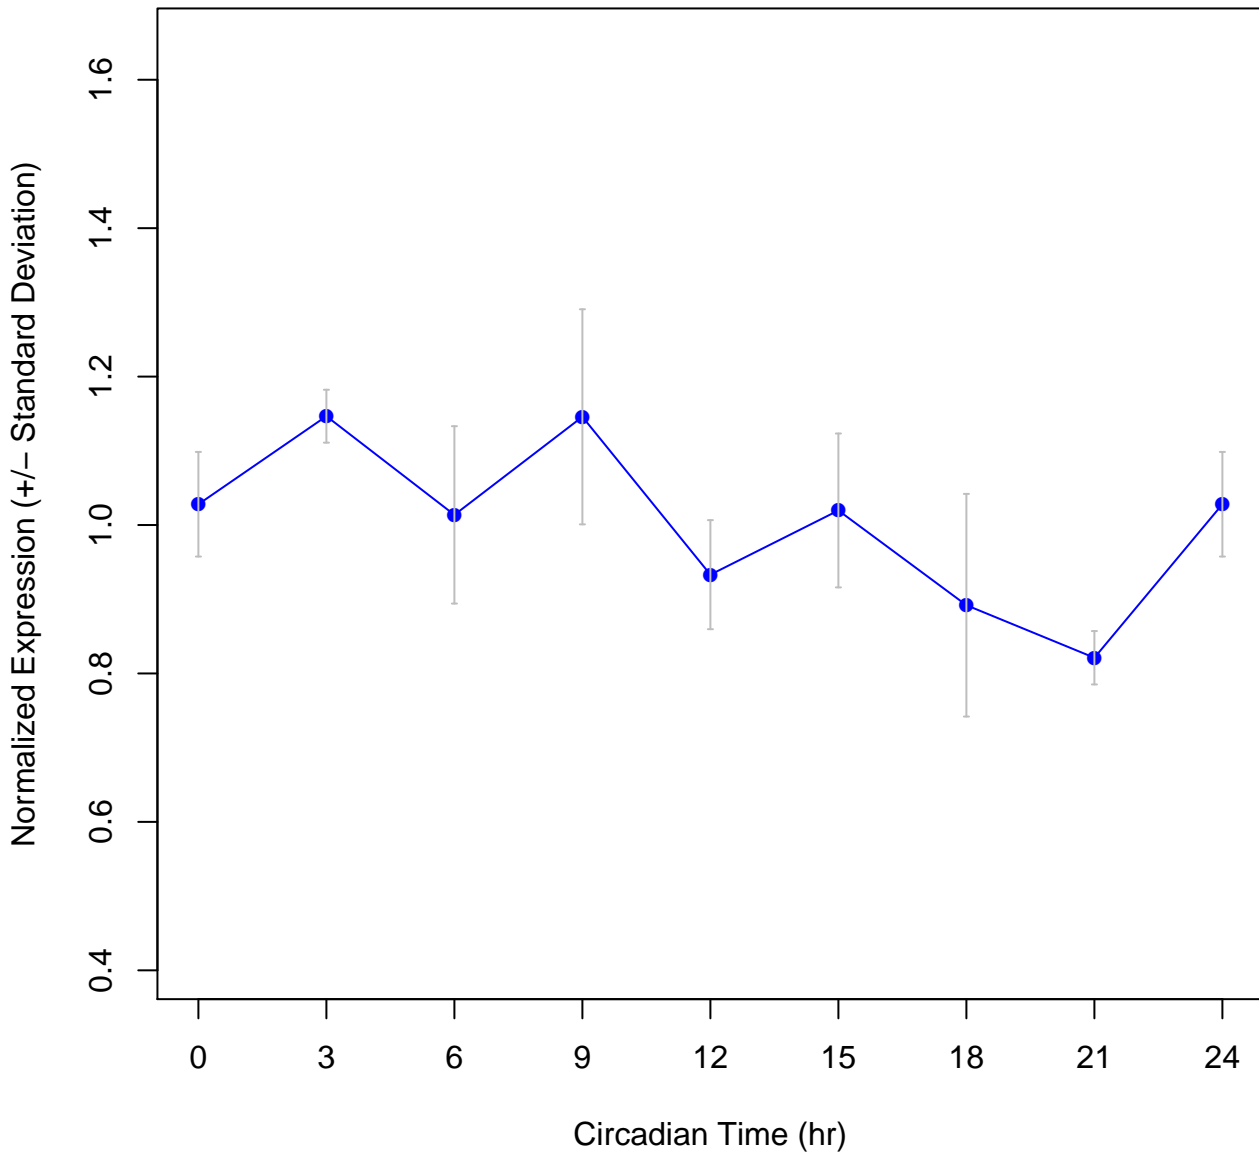

Supplement Figure 4 plk1

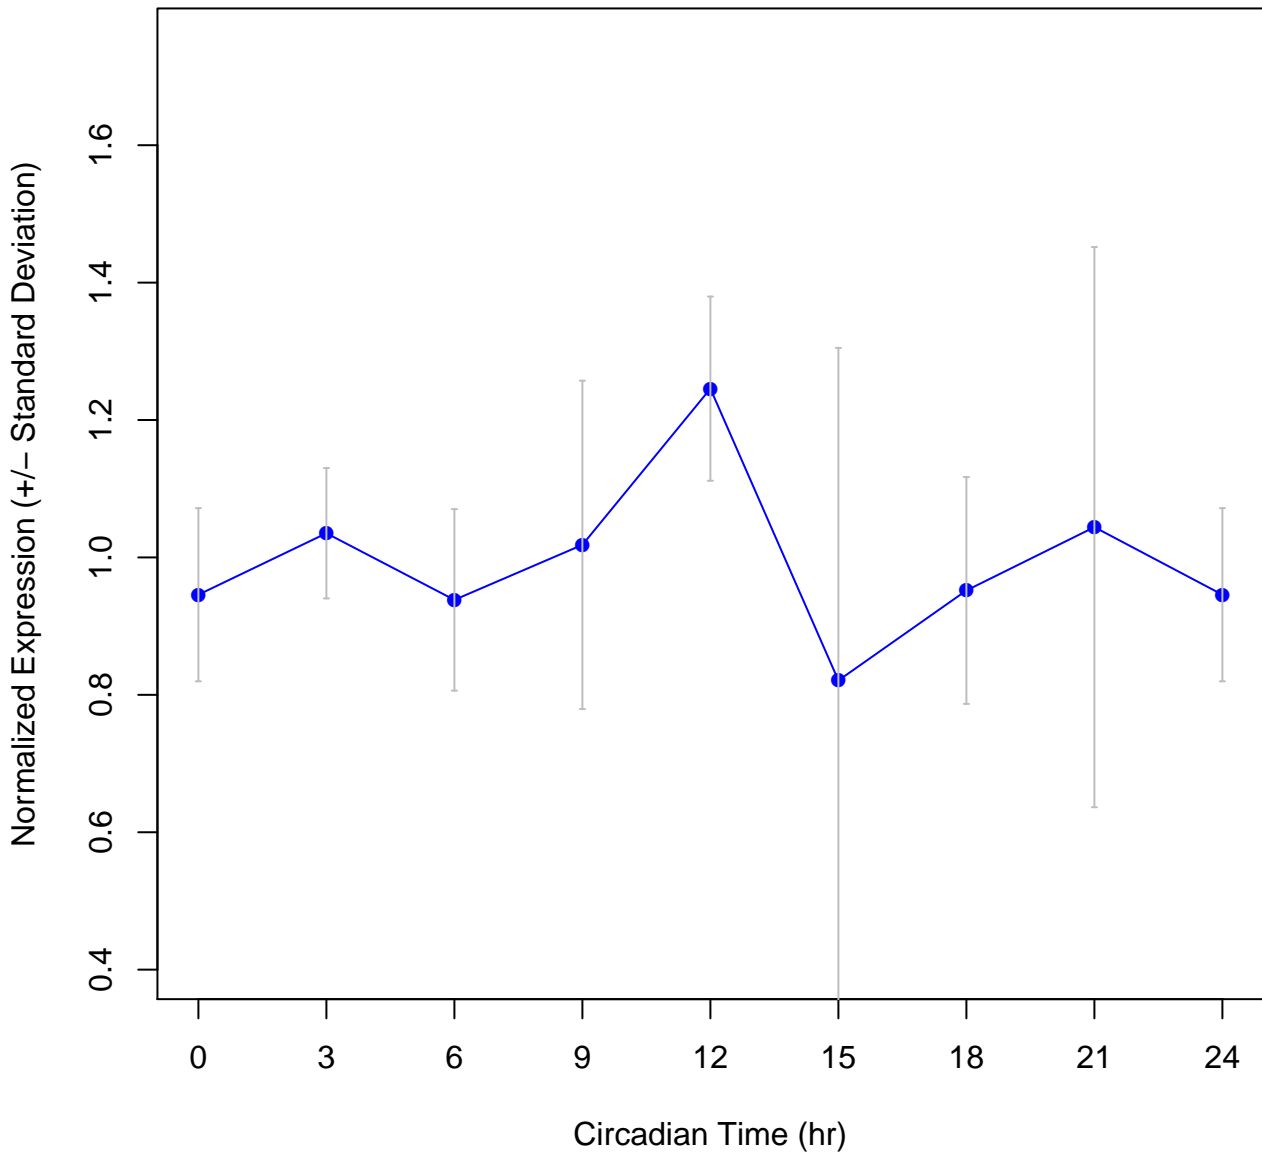

Supplement Figure 4 polr2a

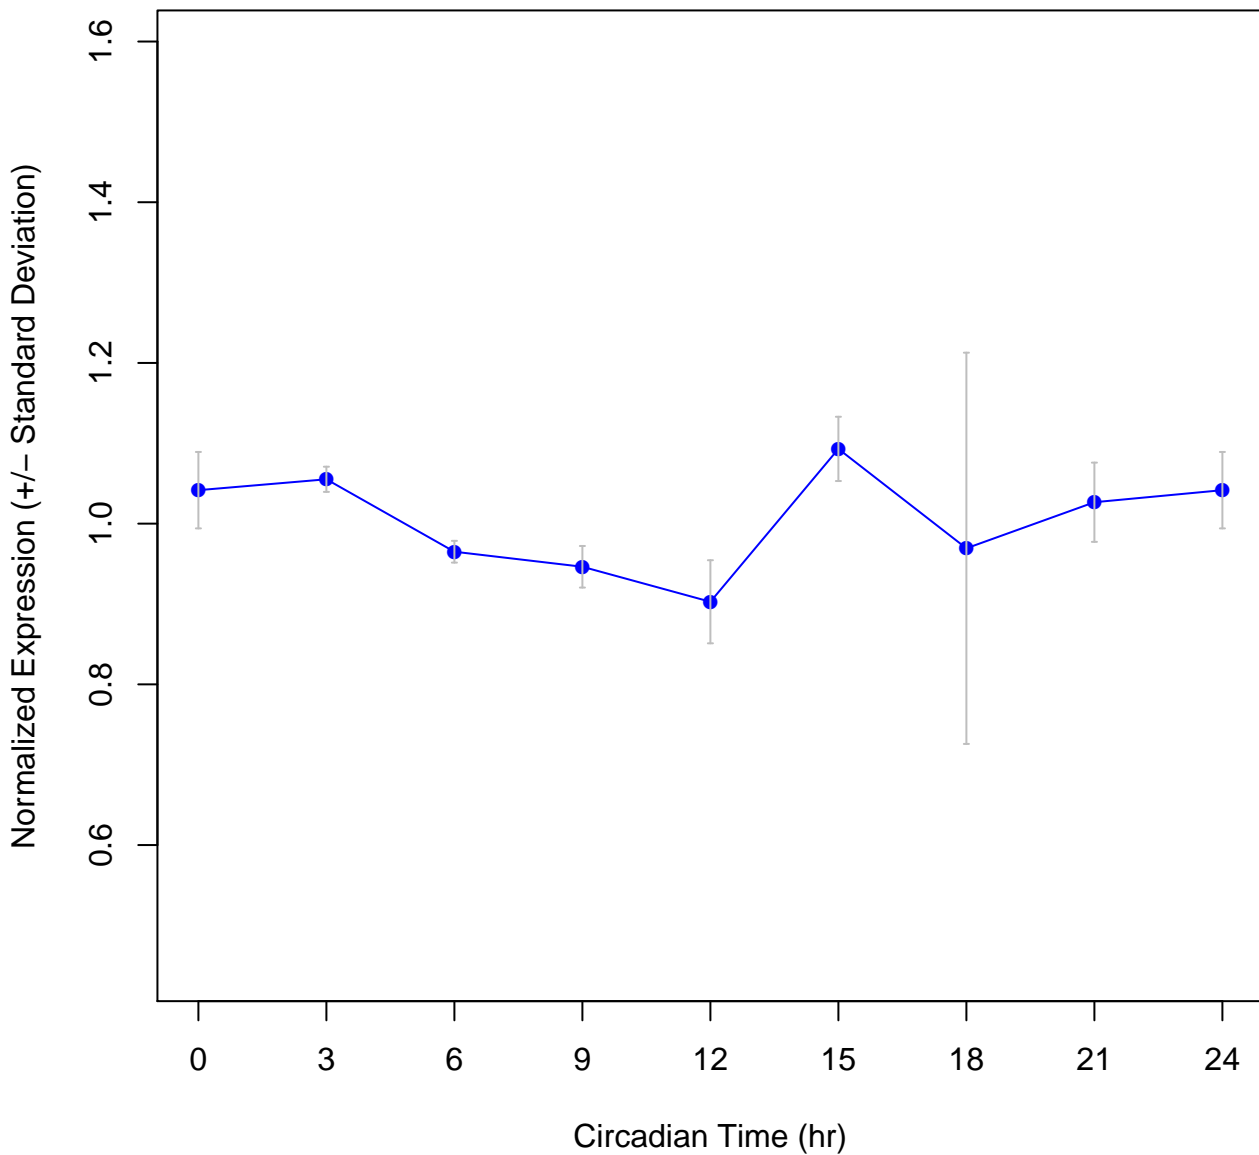

## Supplement Figure 4 pomc

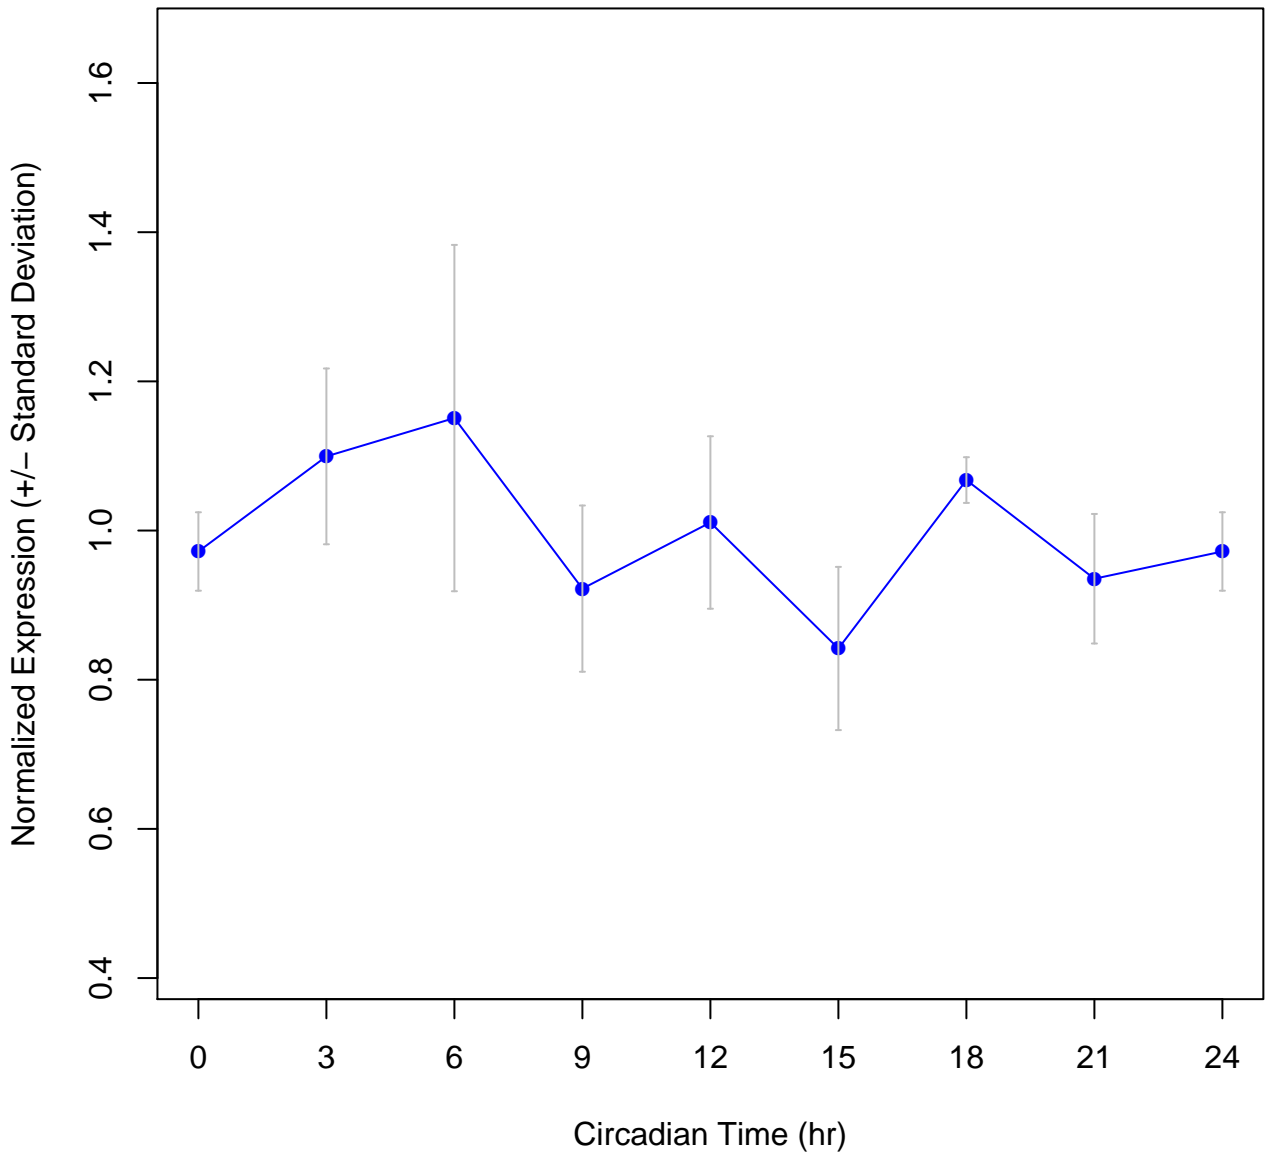

# Supplement Figure 4 pparaa

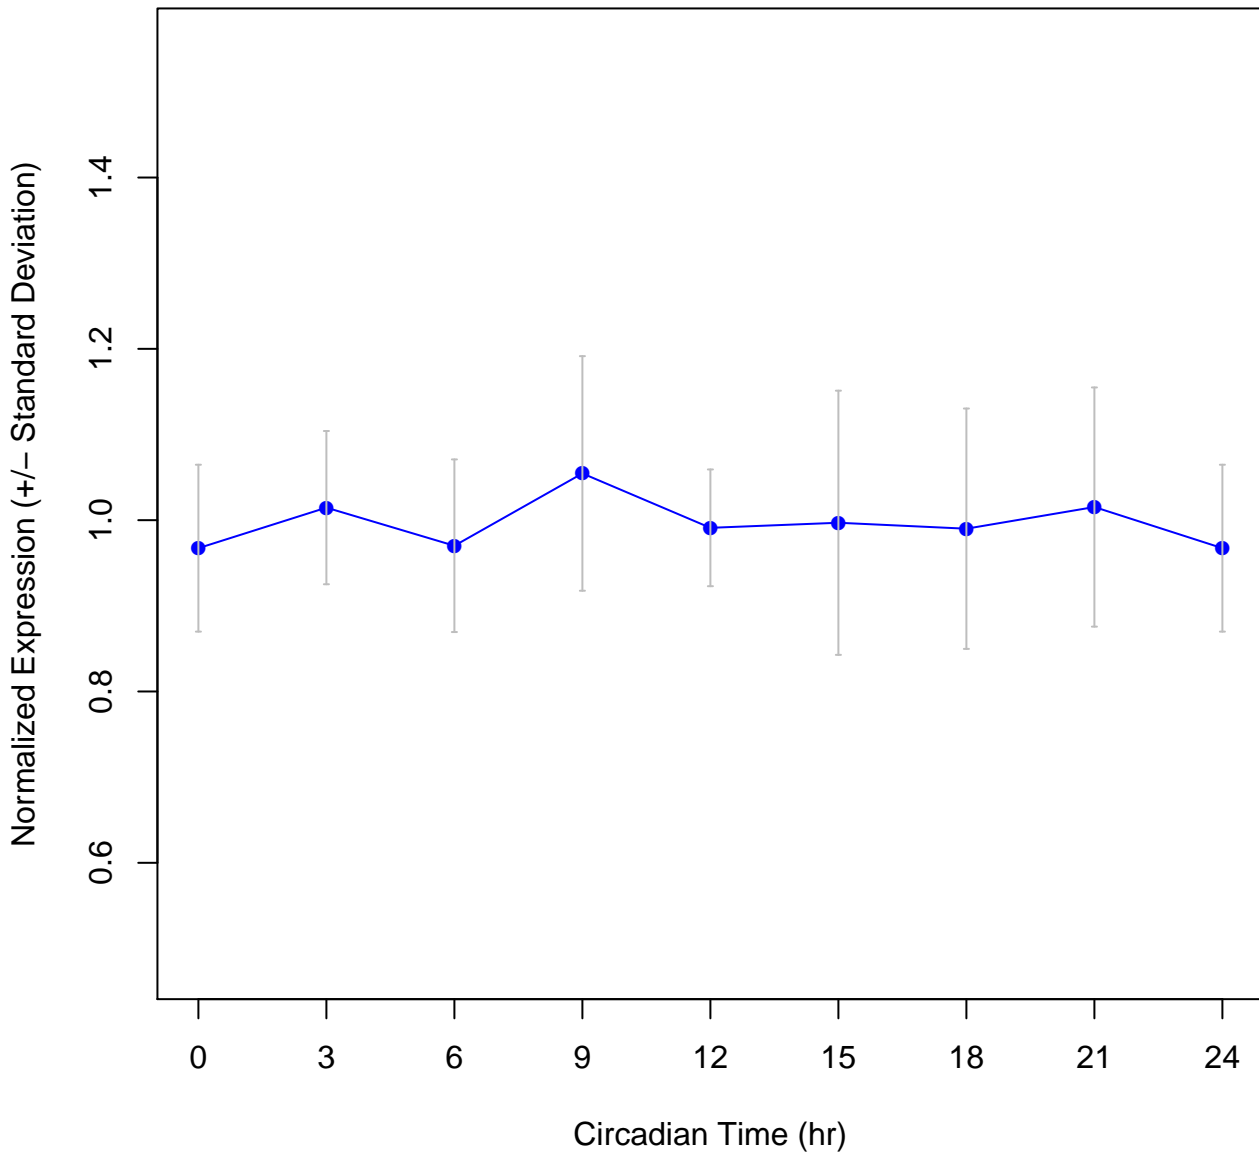

Supplement Figure 4 pparab

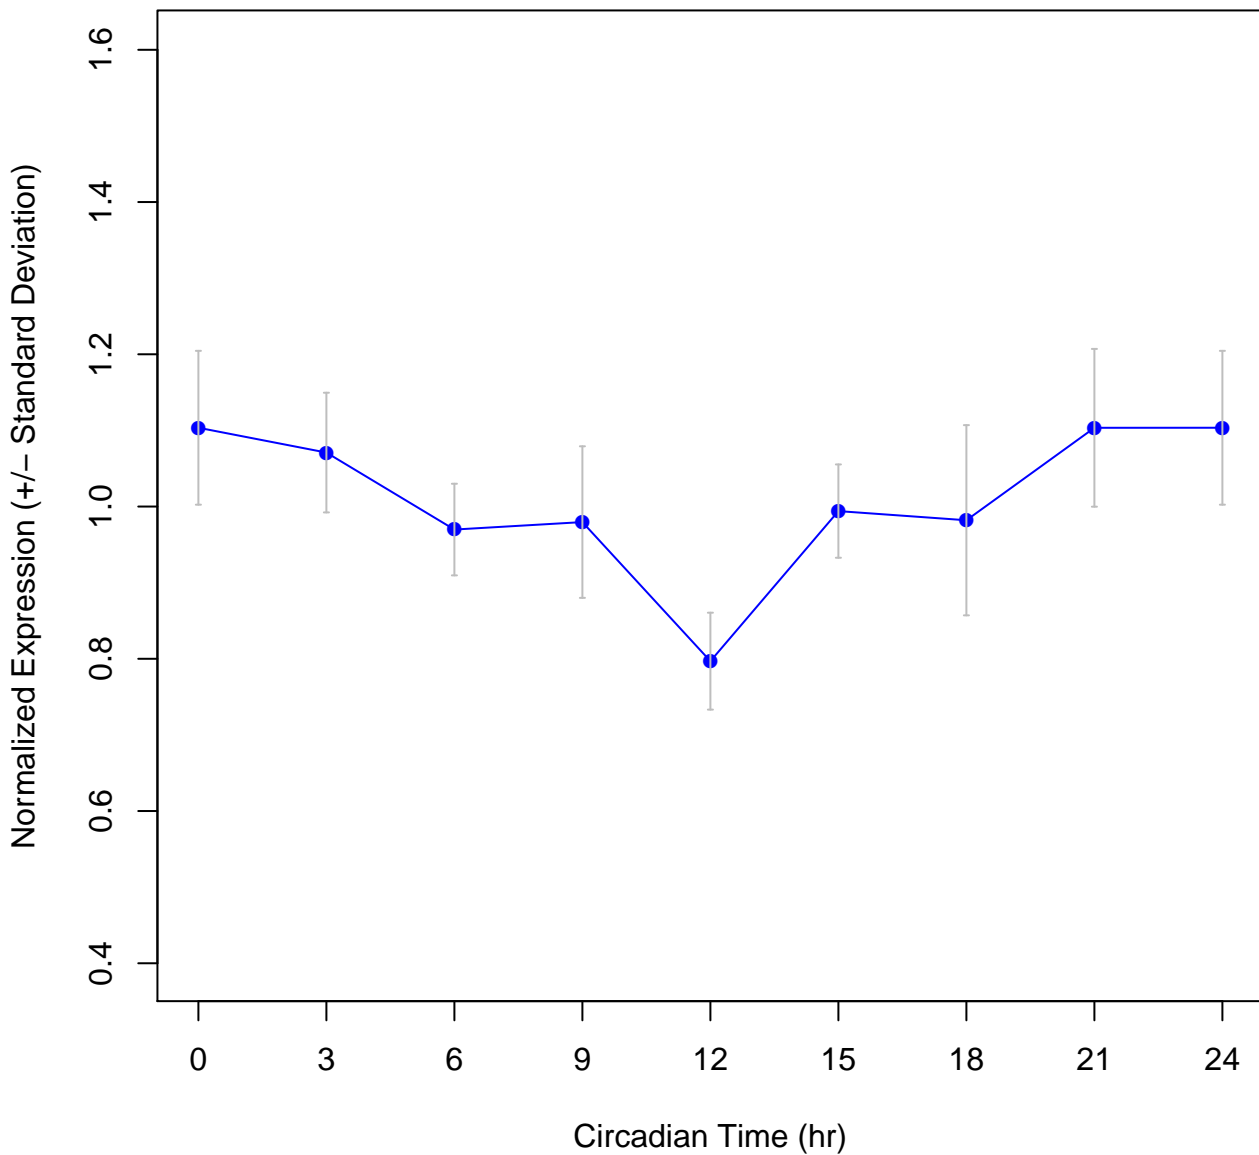

Supplement Figure 4 ppargc1a

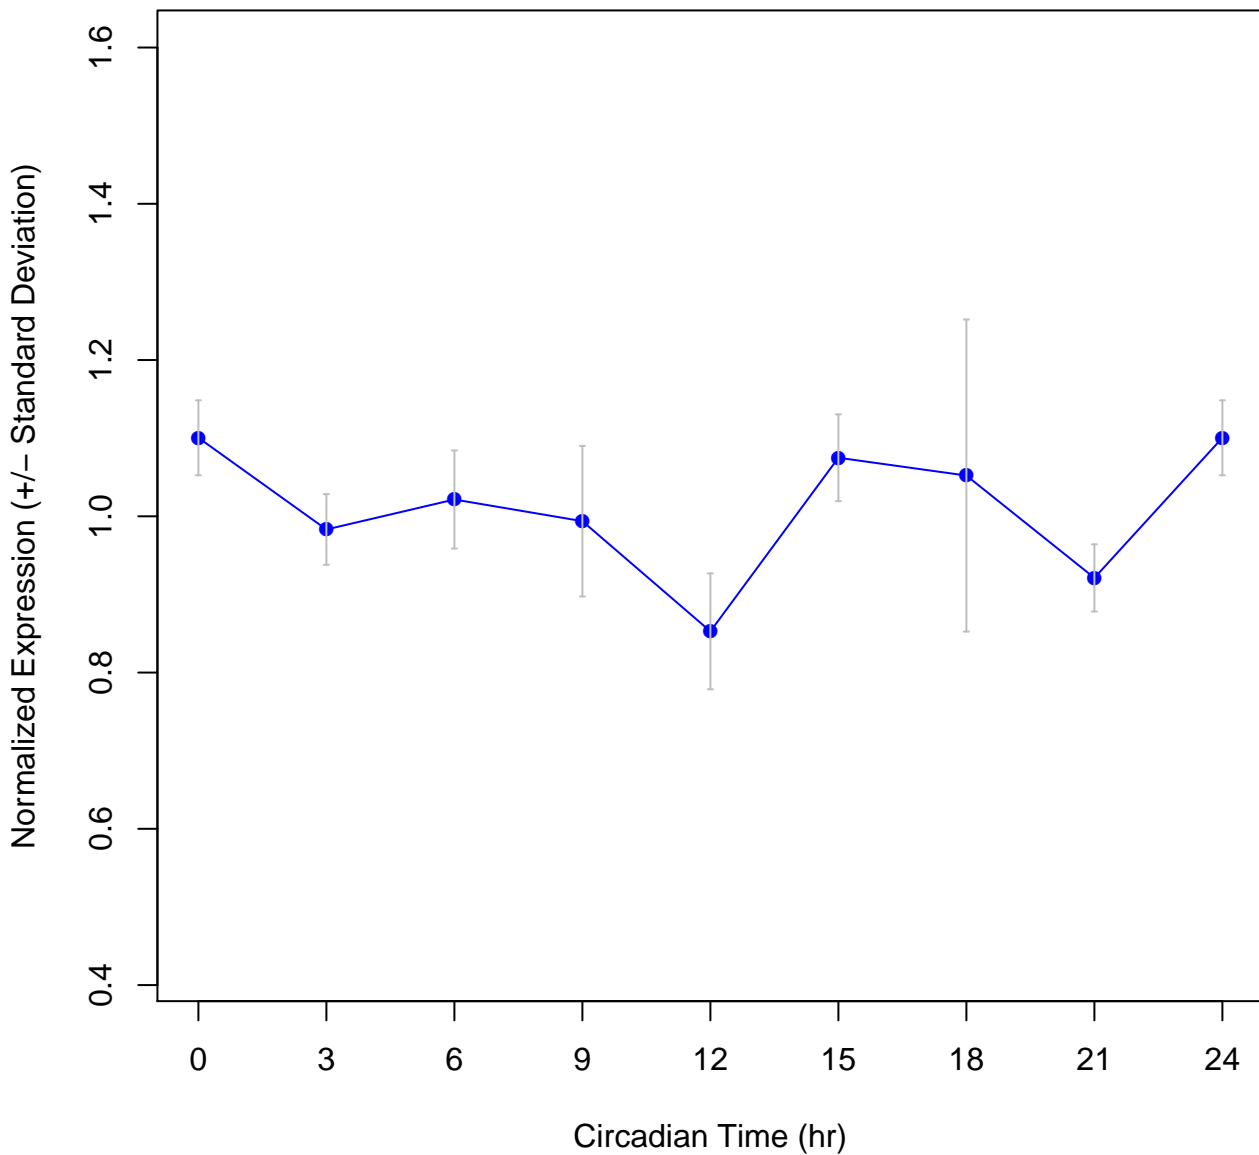

Supplement Figure 4 ppp1r27

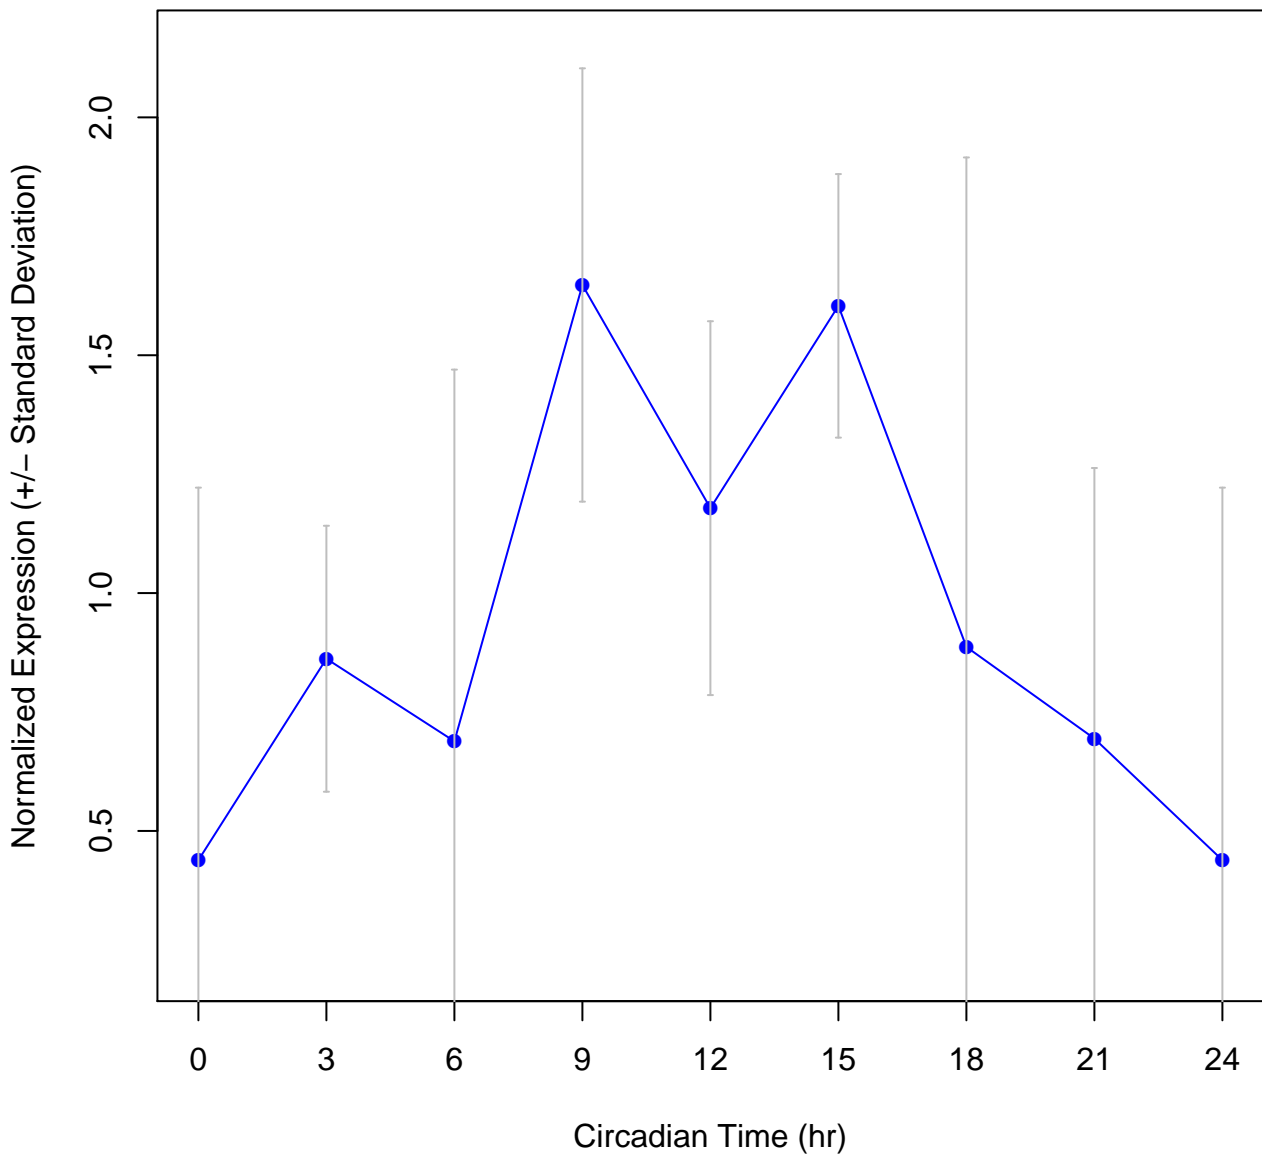



Supplement Figure 4 prc1

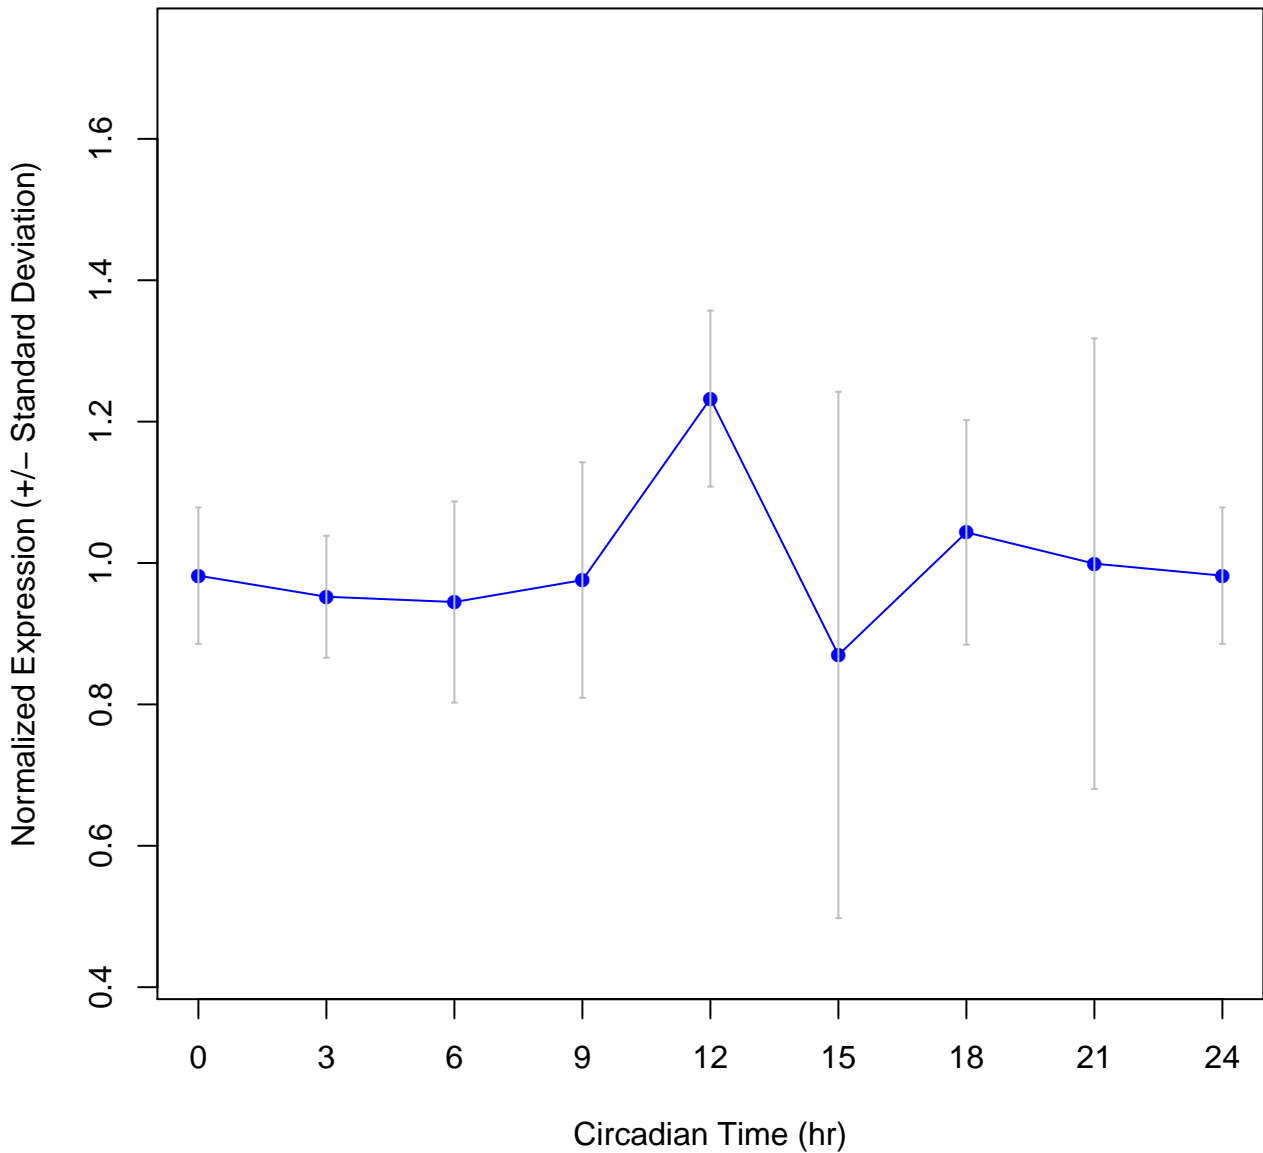

Supplement Figure 4 prkaa2

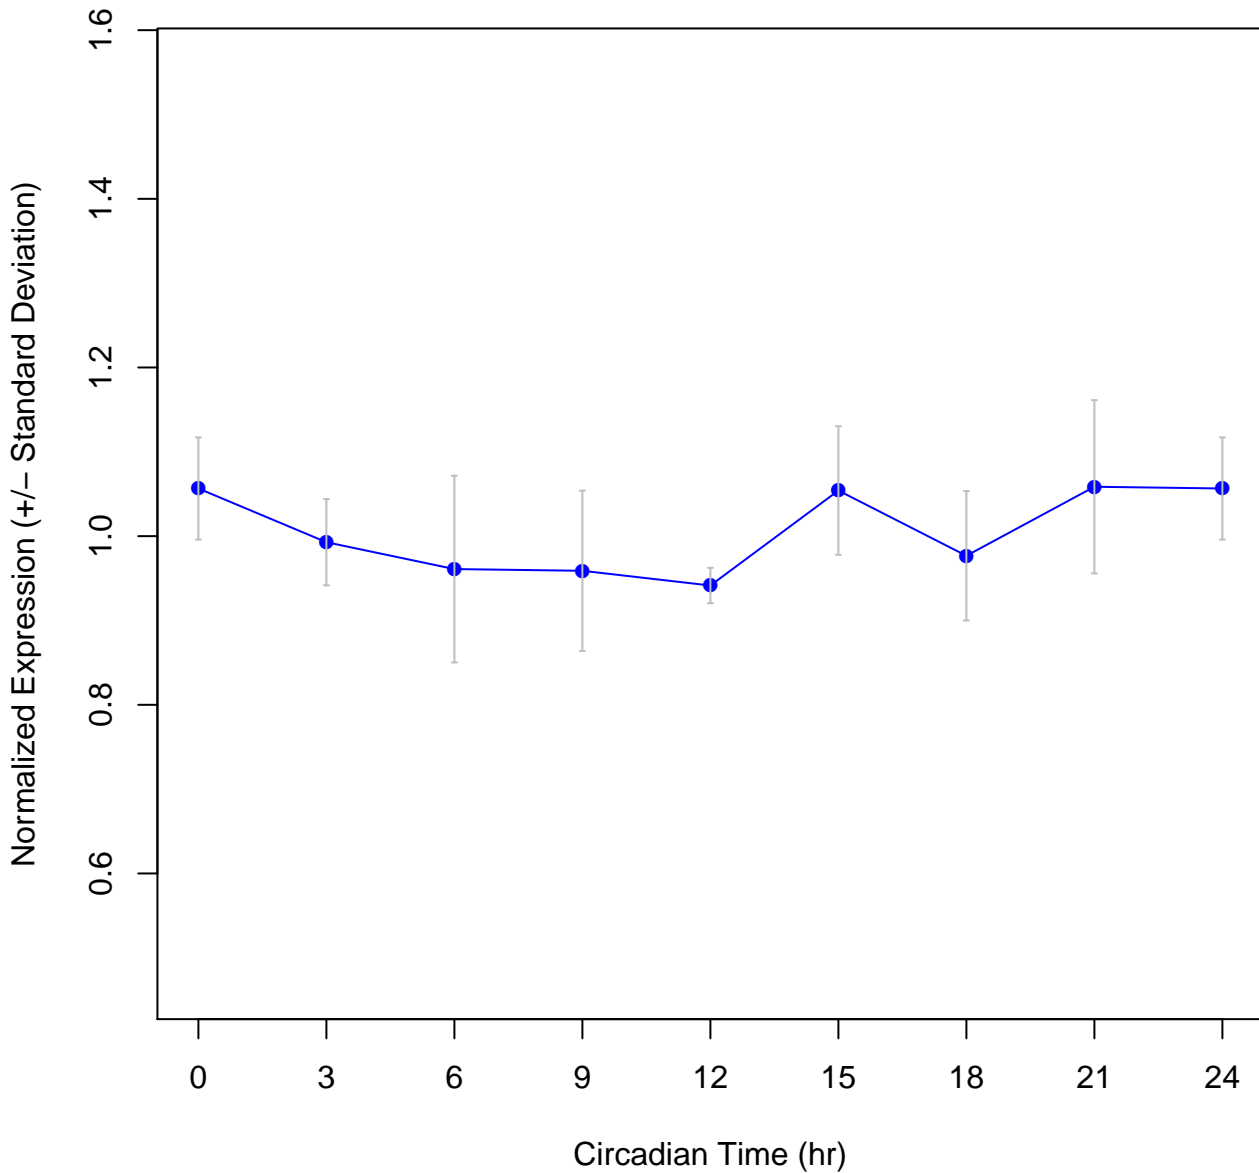

Supplement Figure 4 prkar2a

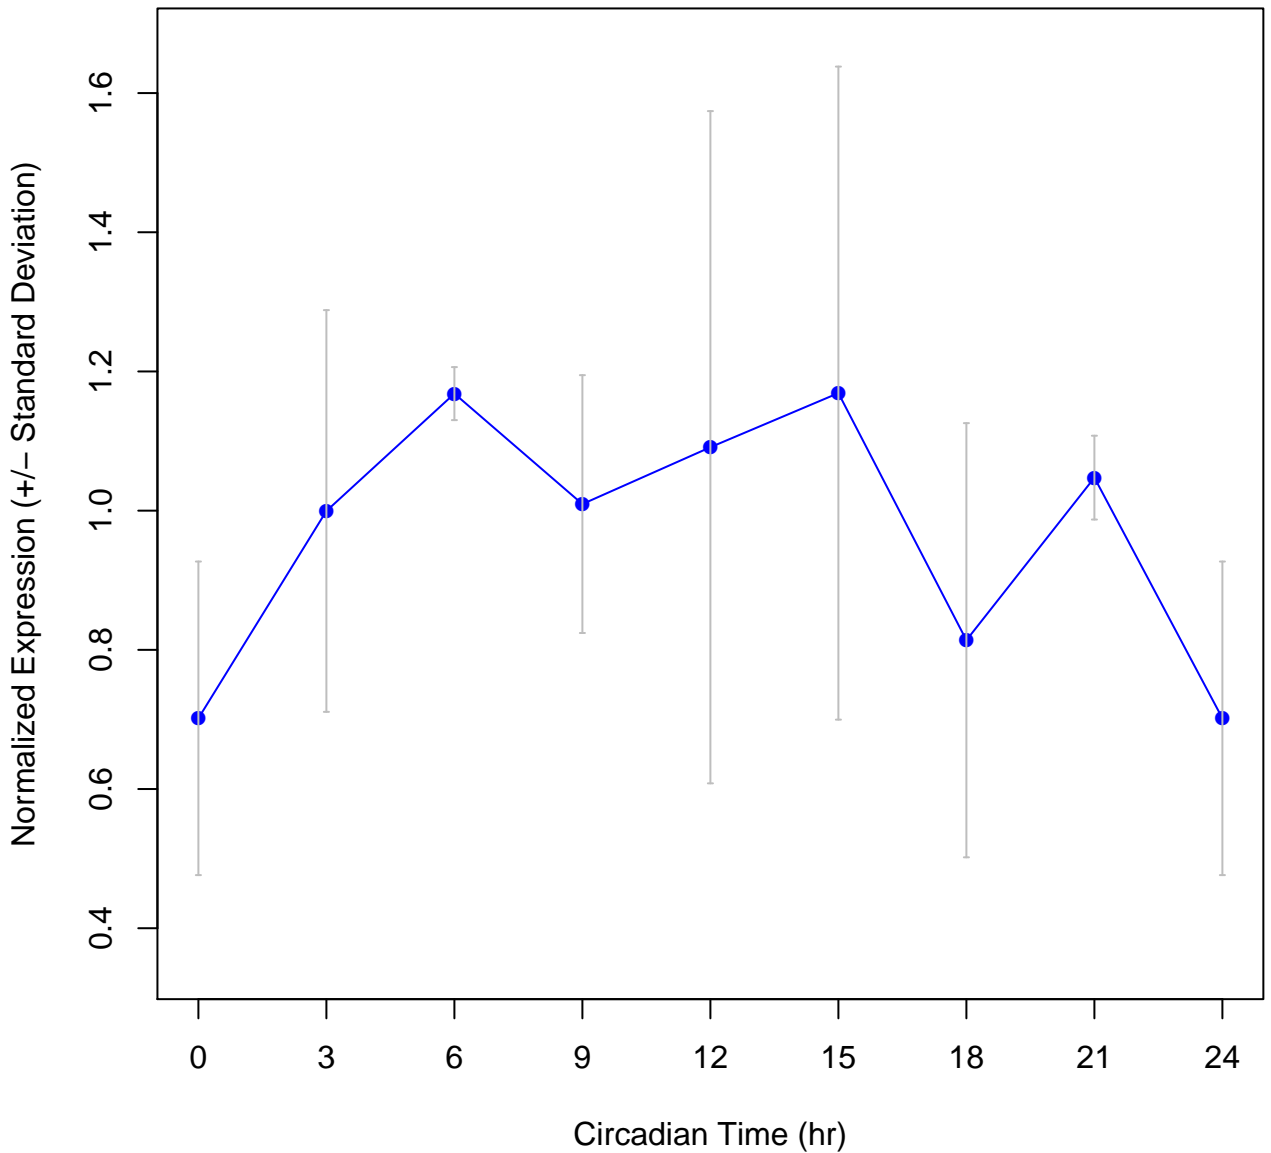

Supplement Figure 4 prkca\_1

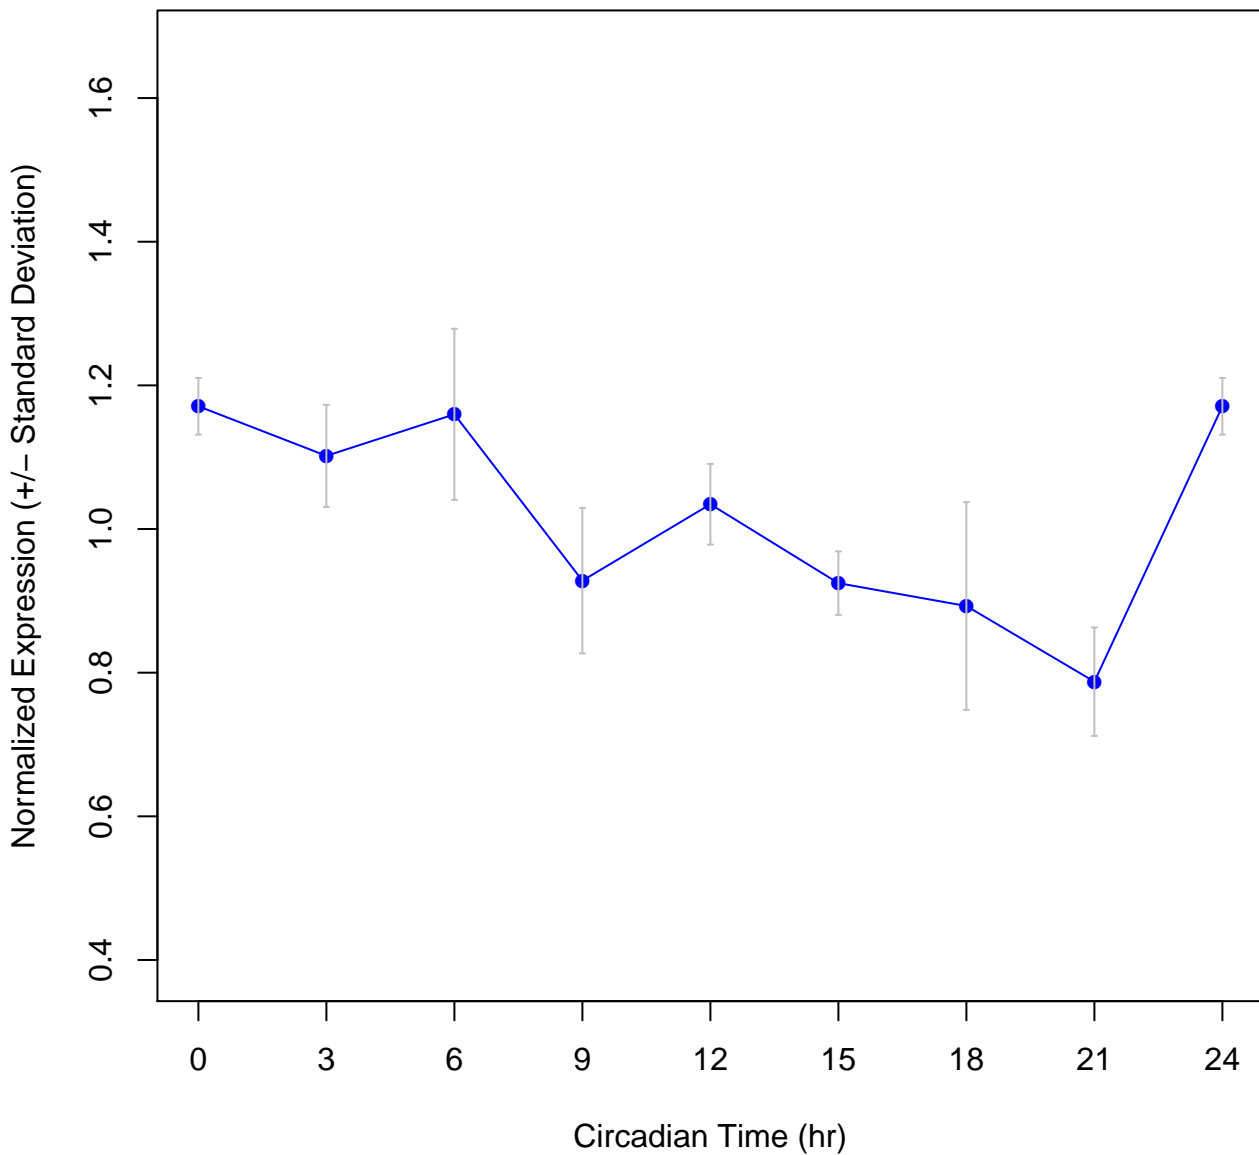

Supplement Figure 4 prkca\_2

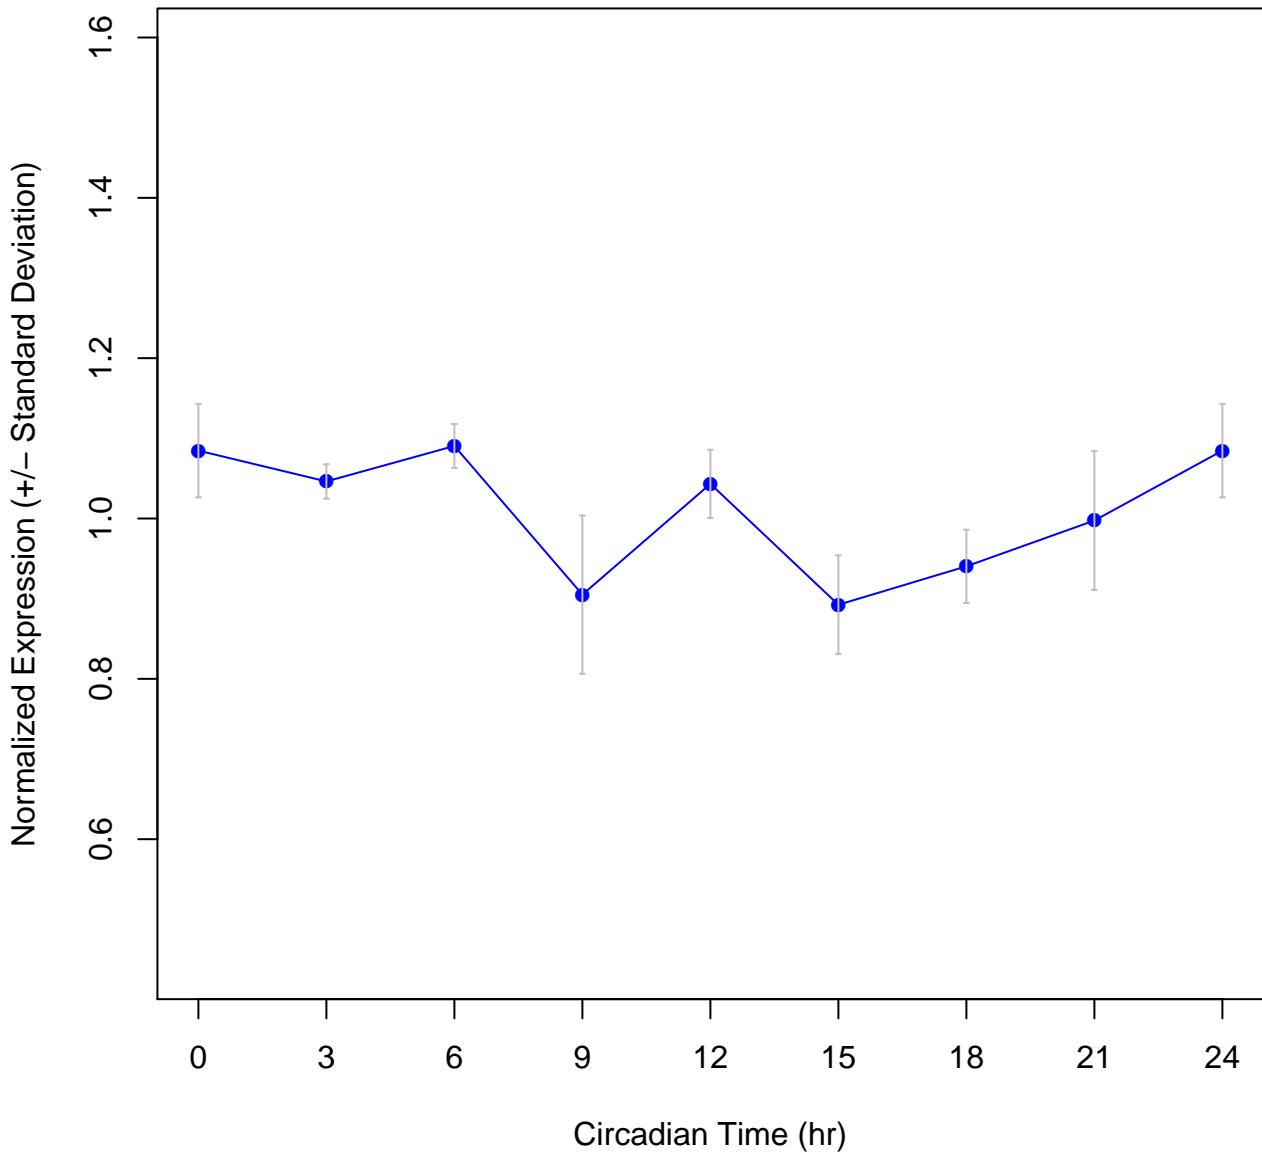

**Supplement Figure 4 prkcb**

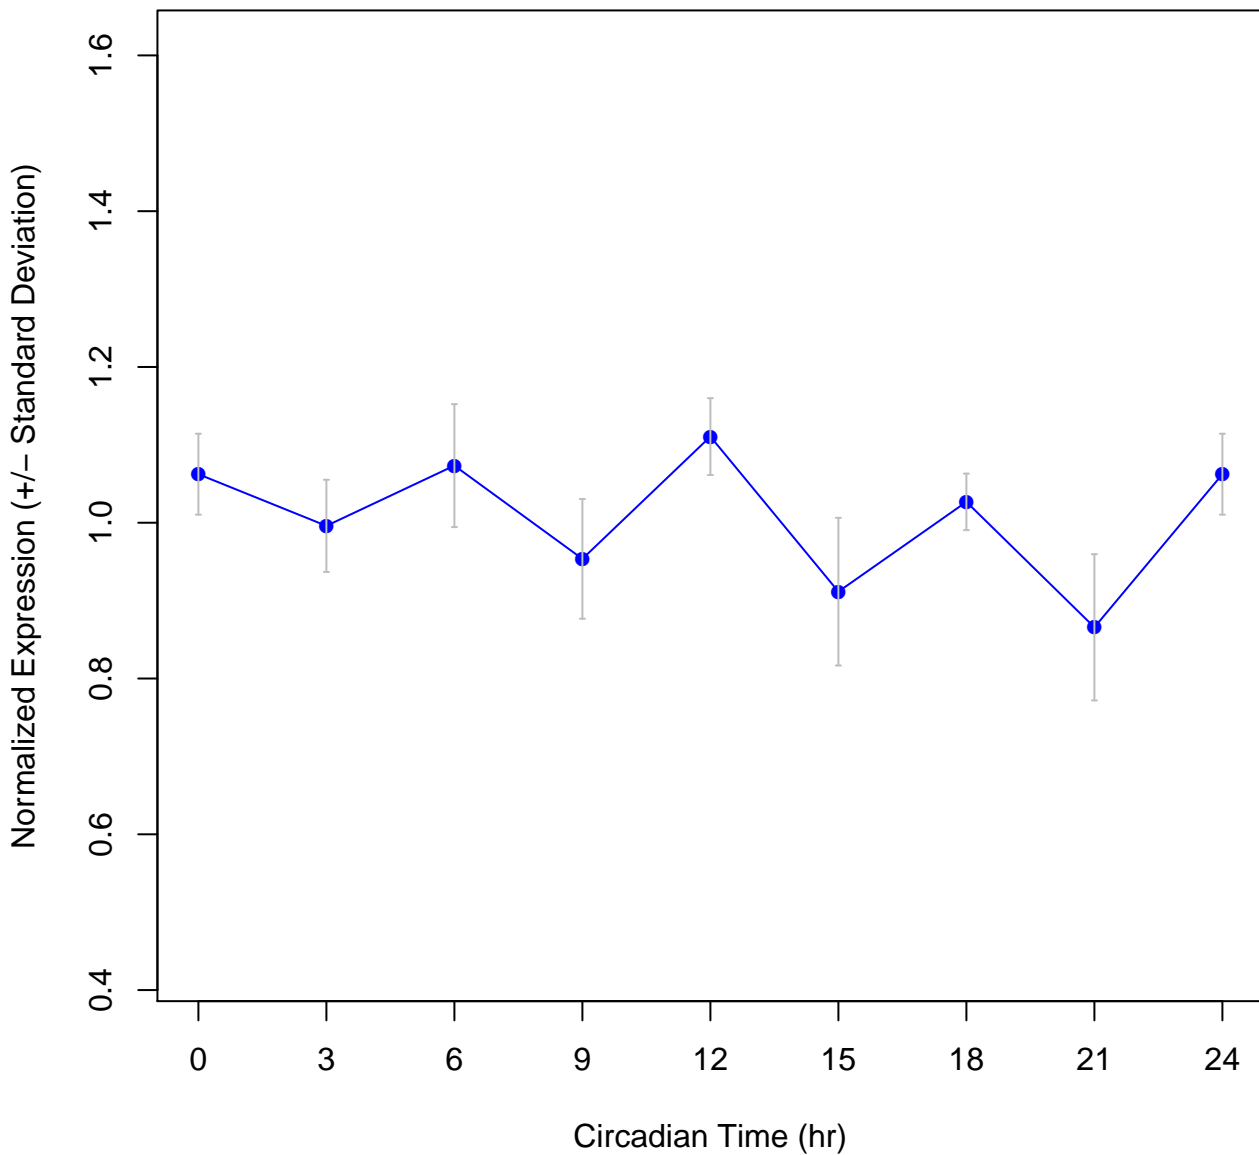

Supplement Figure 4 prkdc

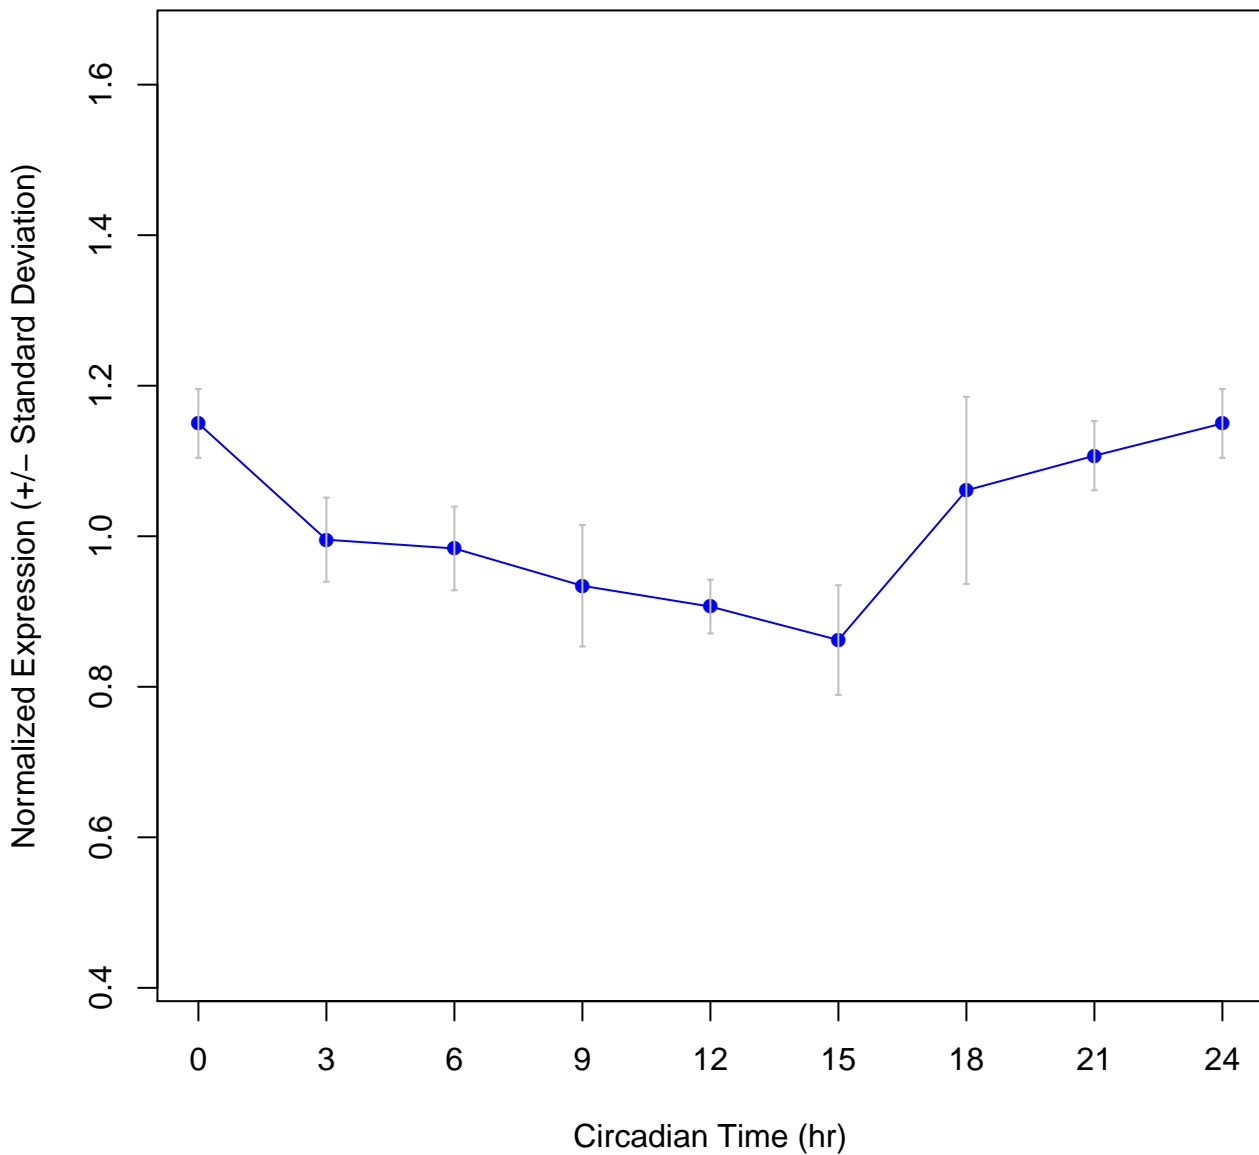

Supplement Figure 4 rab3b

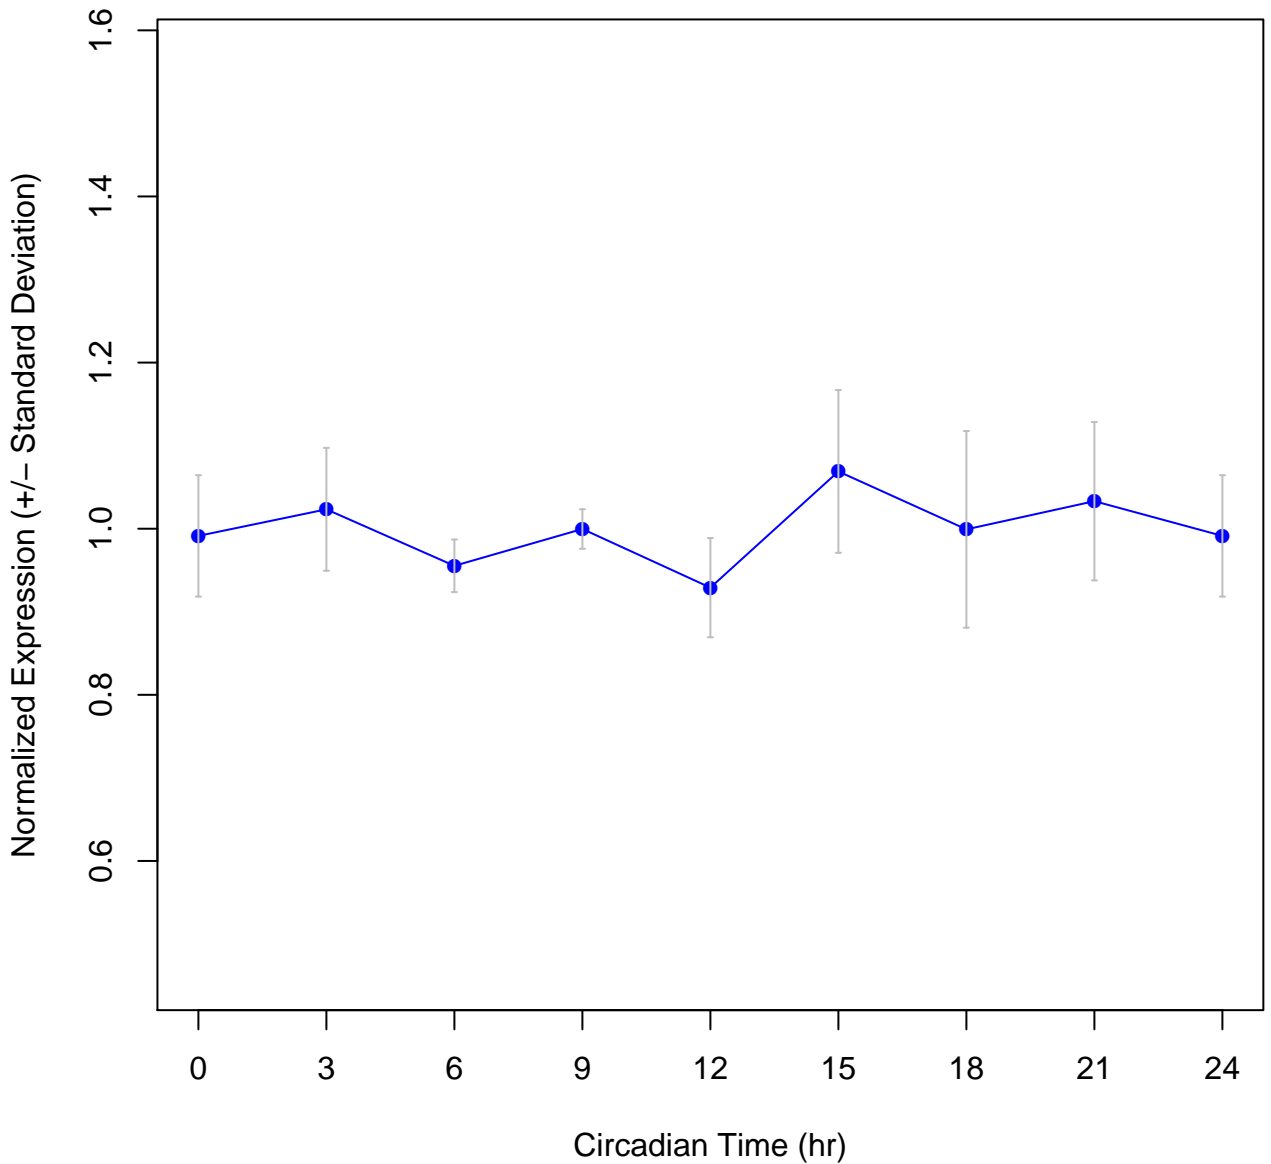



Supplement Figure 4 rara

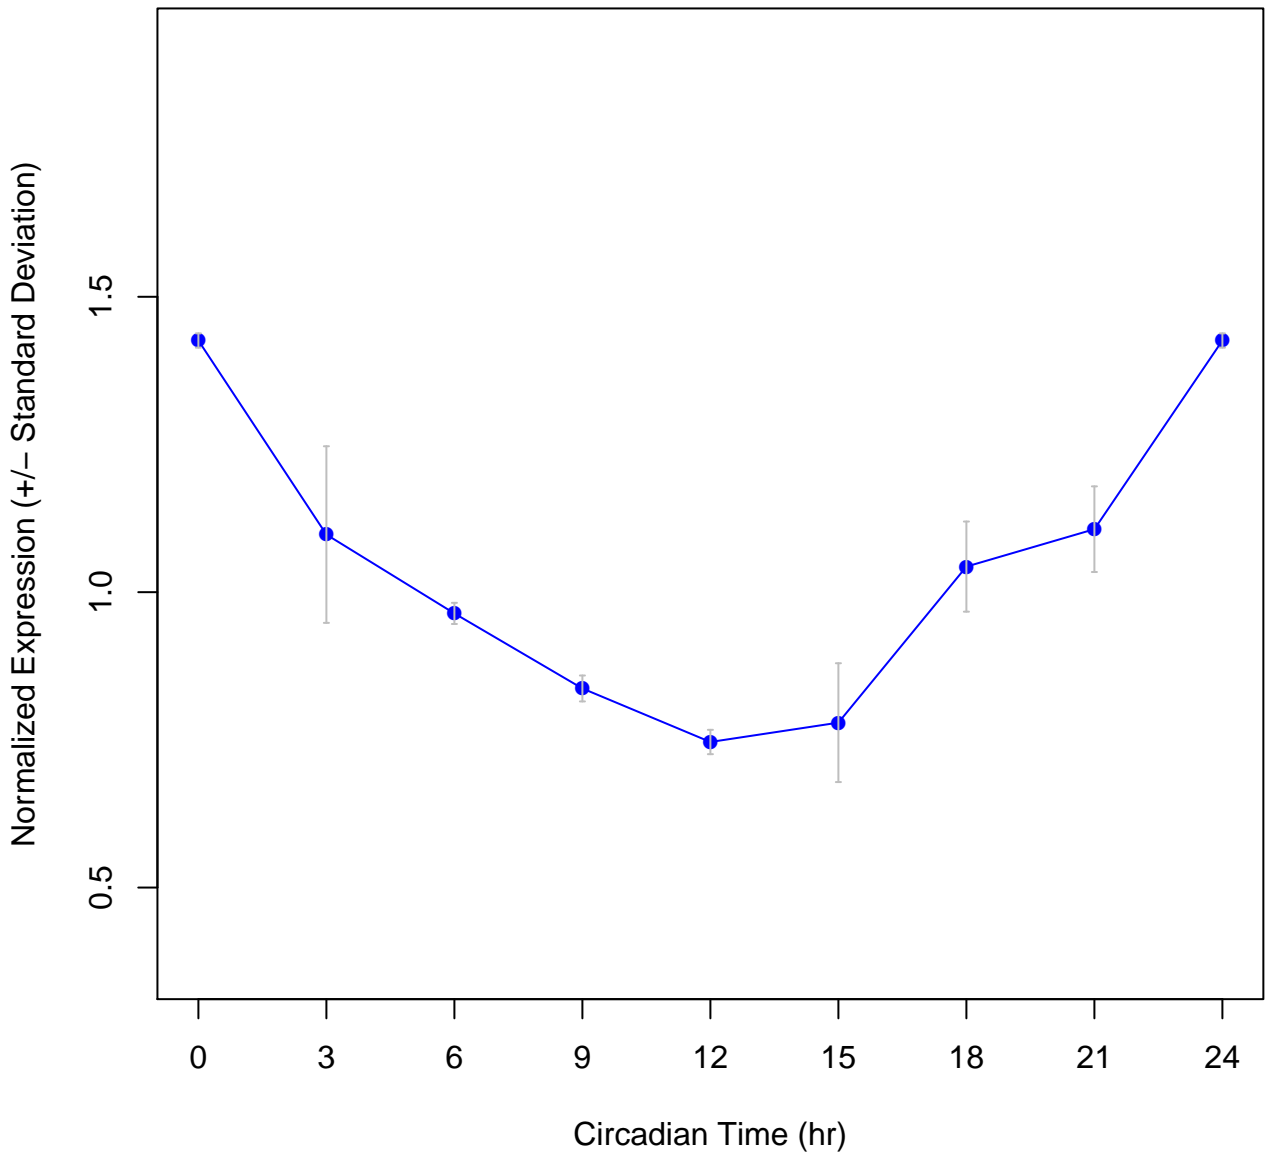

**Supplement Figure 4 rarb**

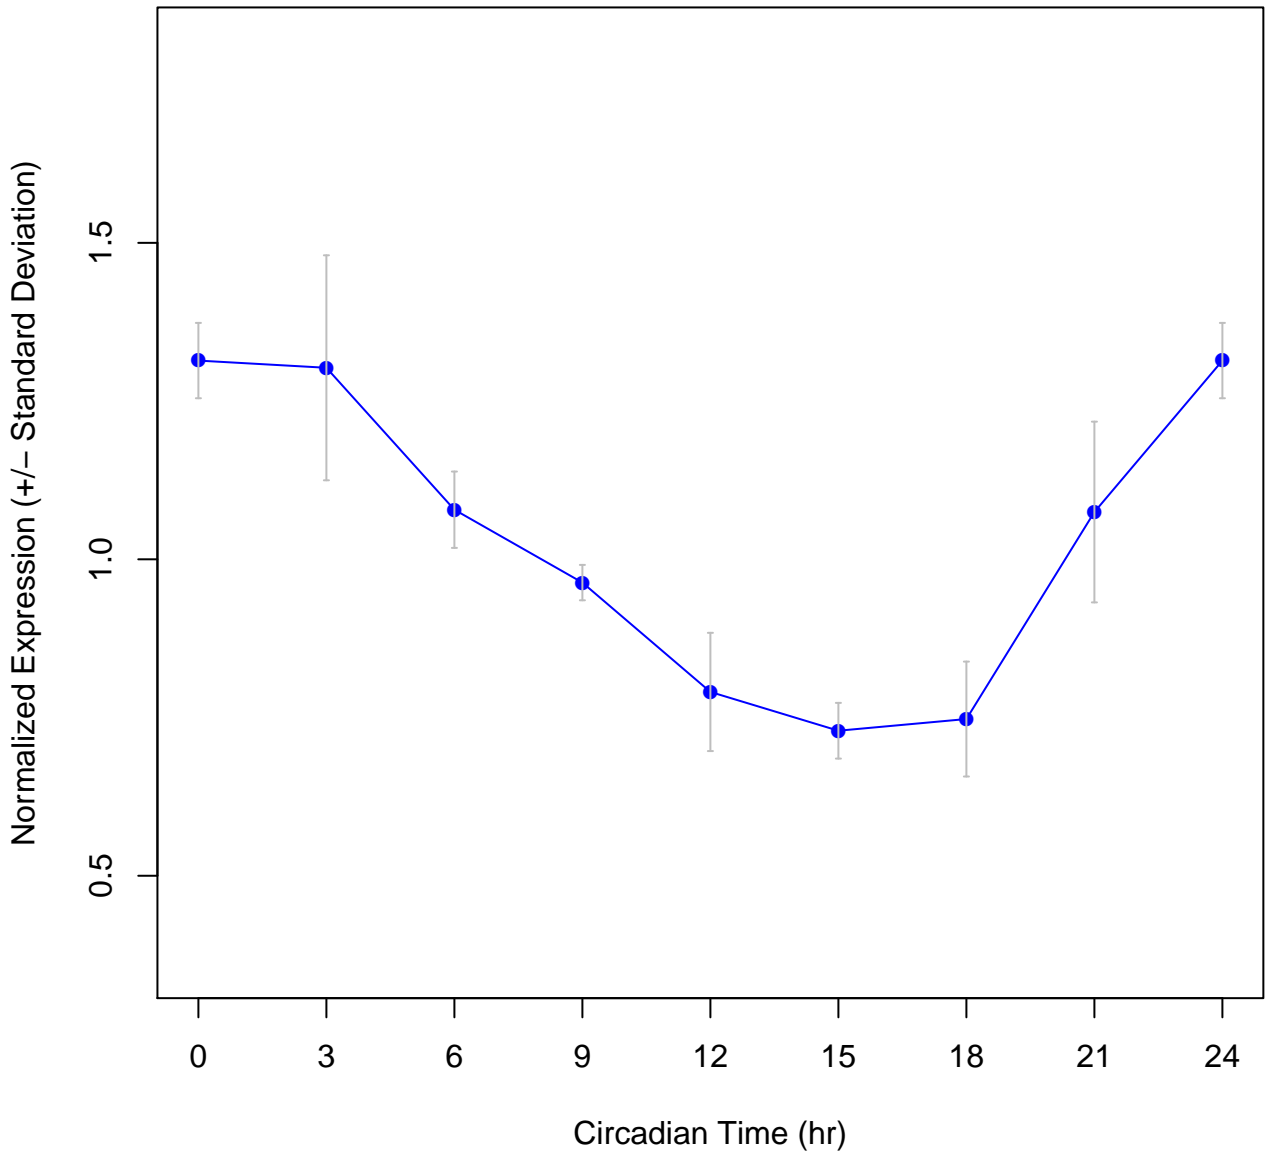

Supplement Figure 4 raver1

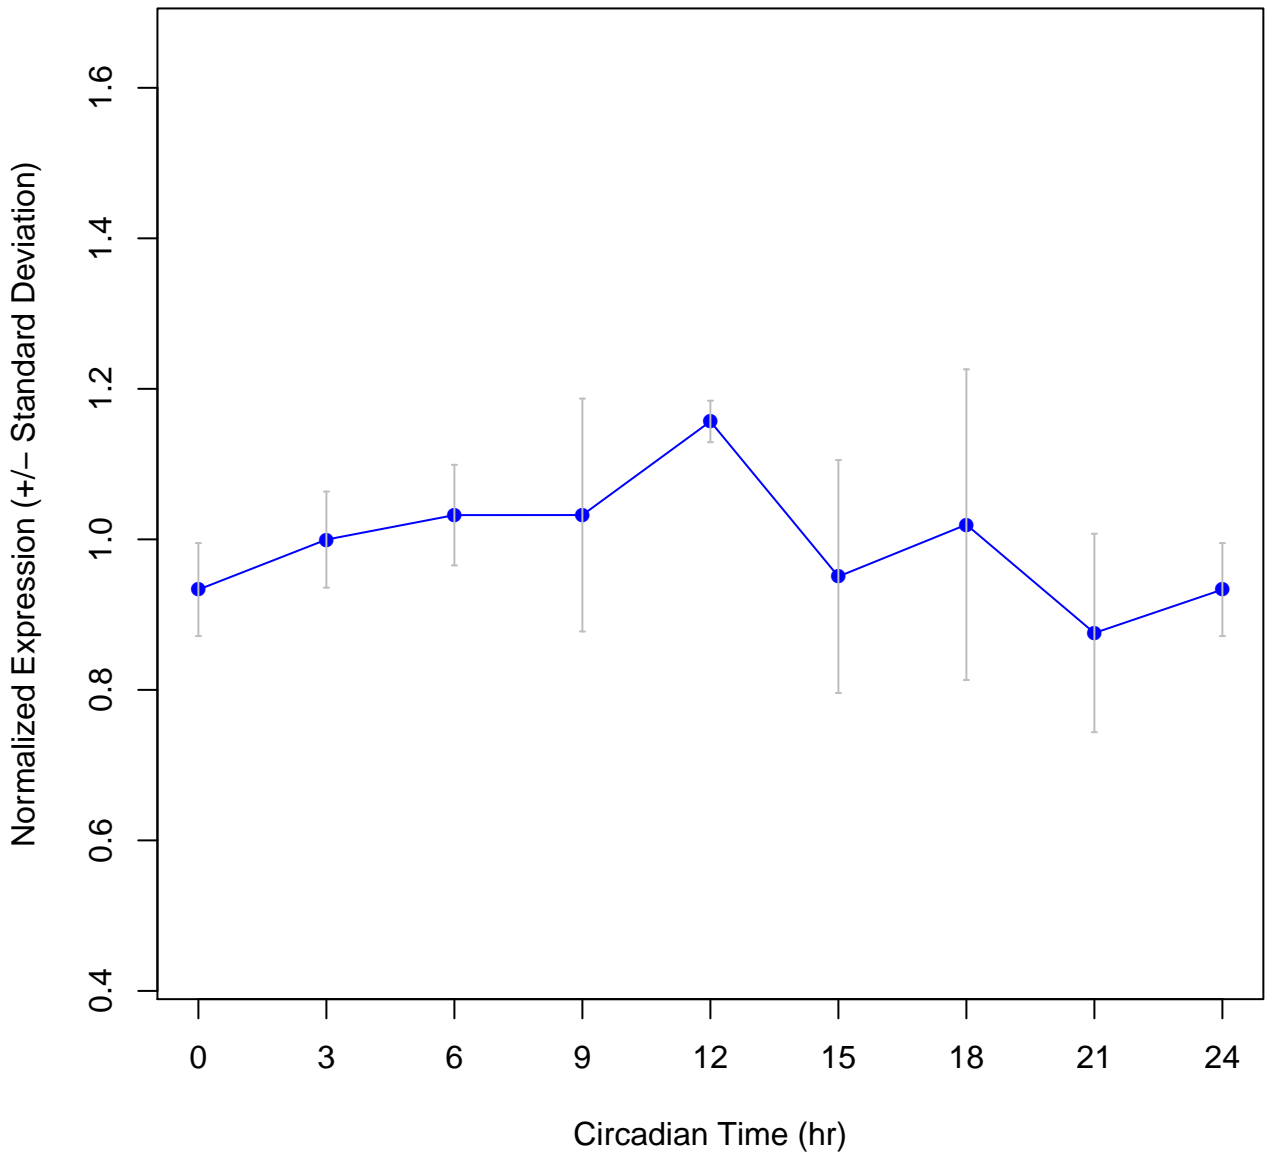

Supplement Figure 4 rbbp5

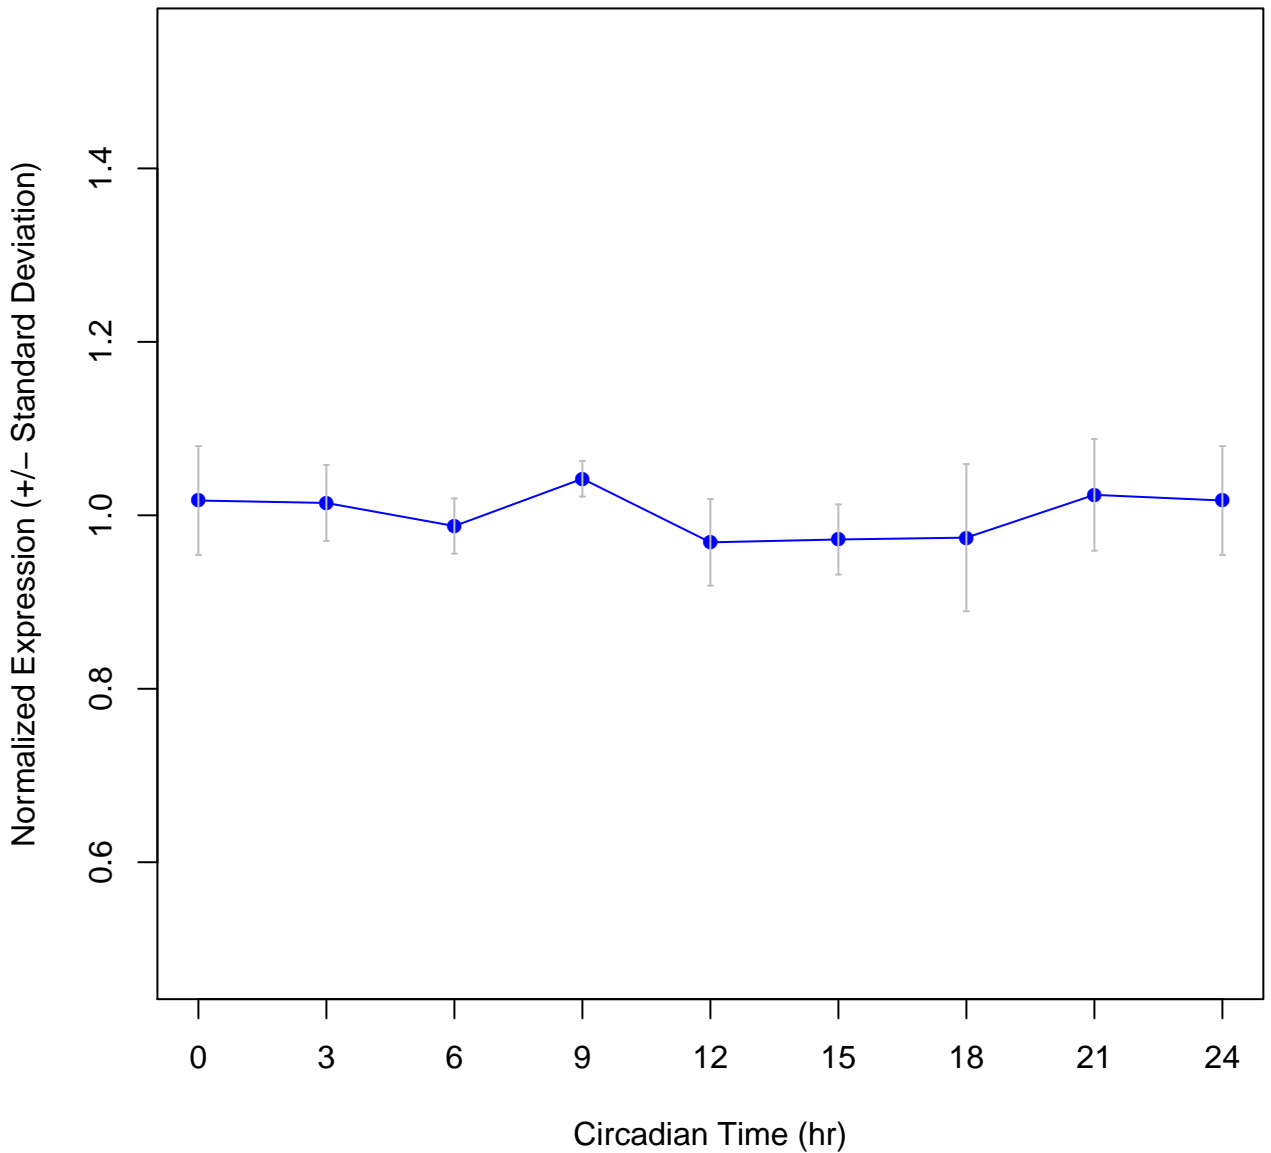

Supplement Figure 4 rora

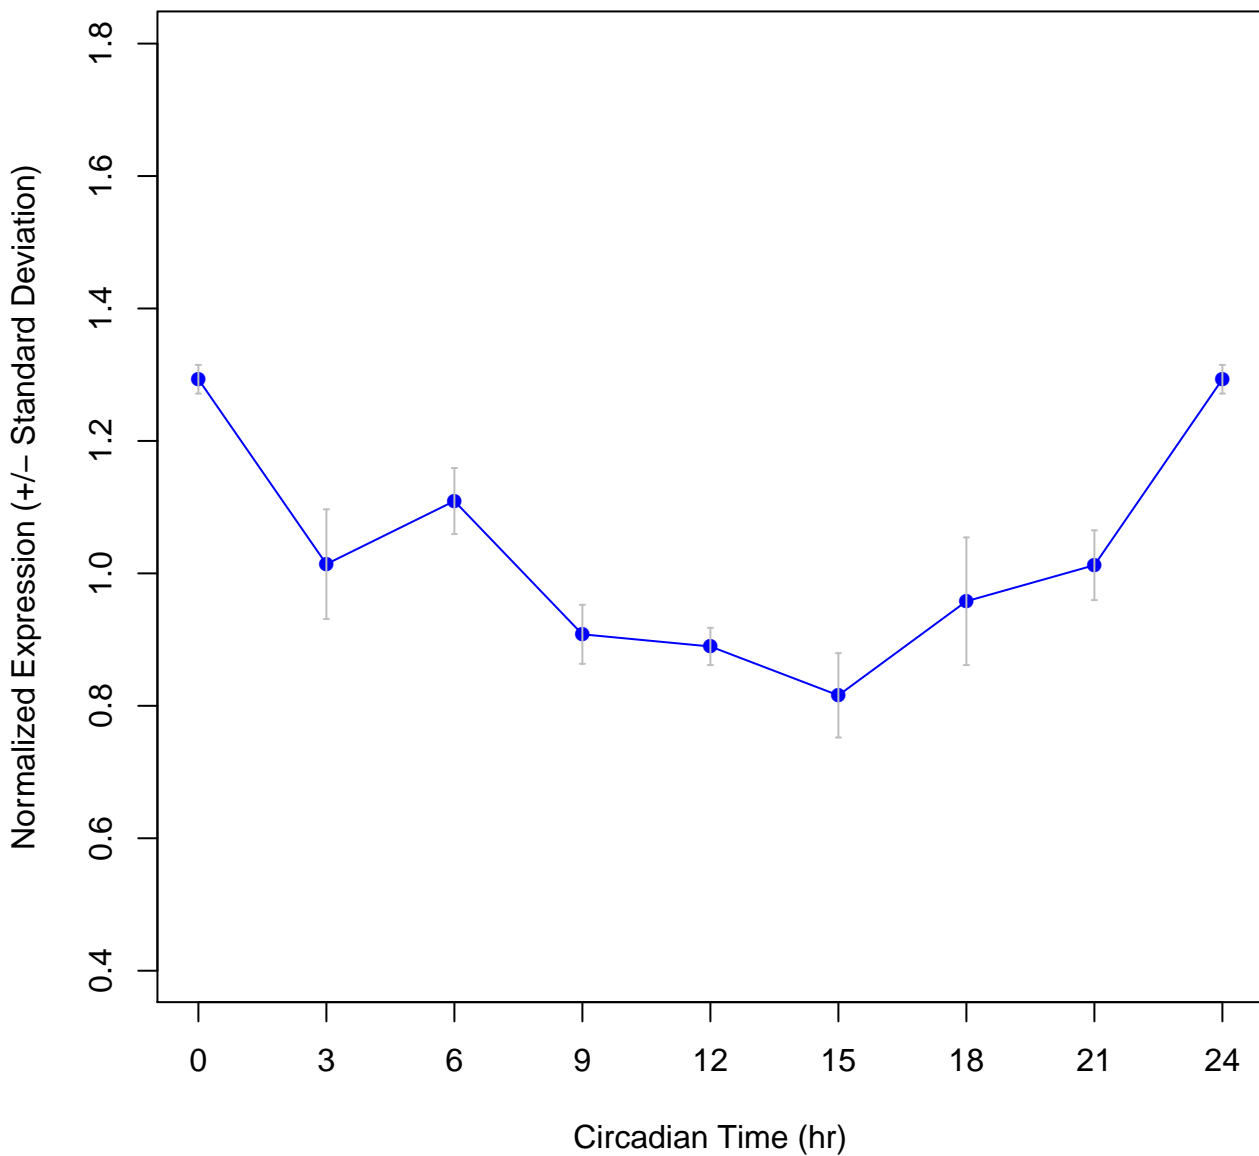

Supplement Figure 4 rps6ka2

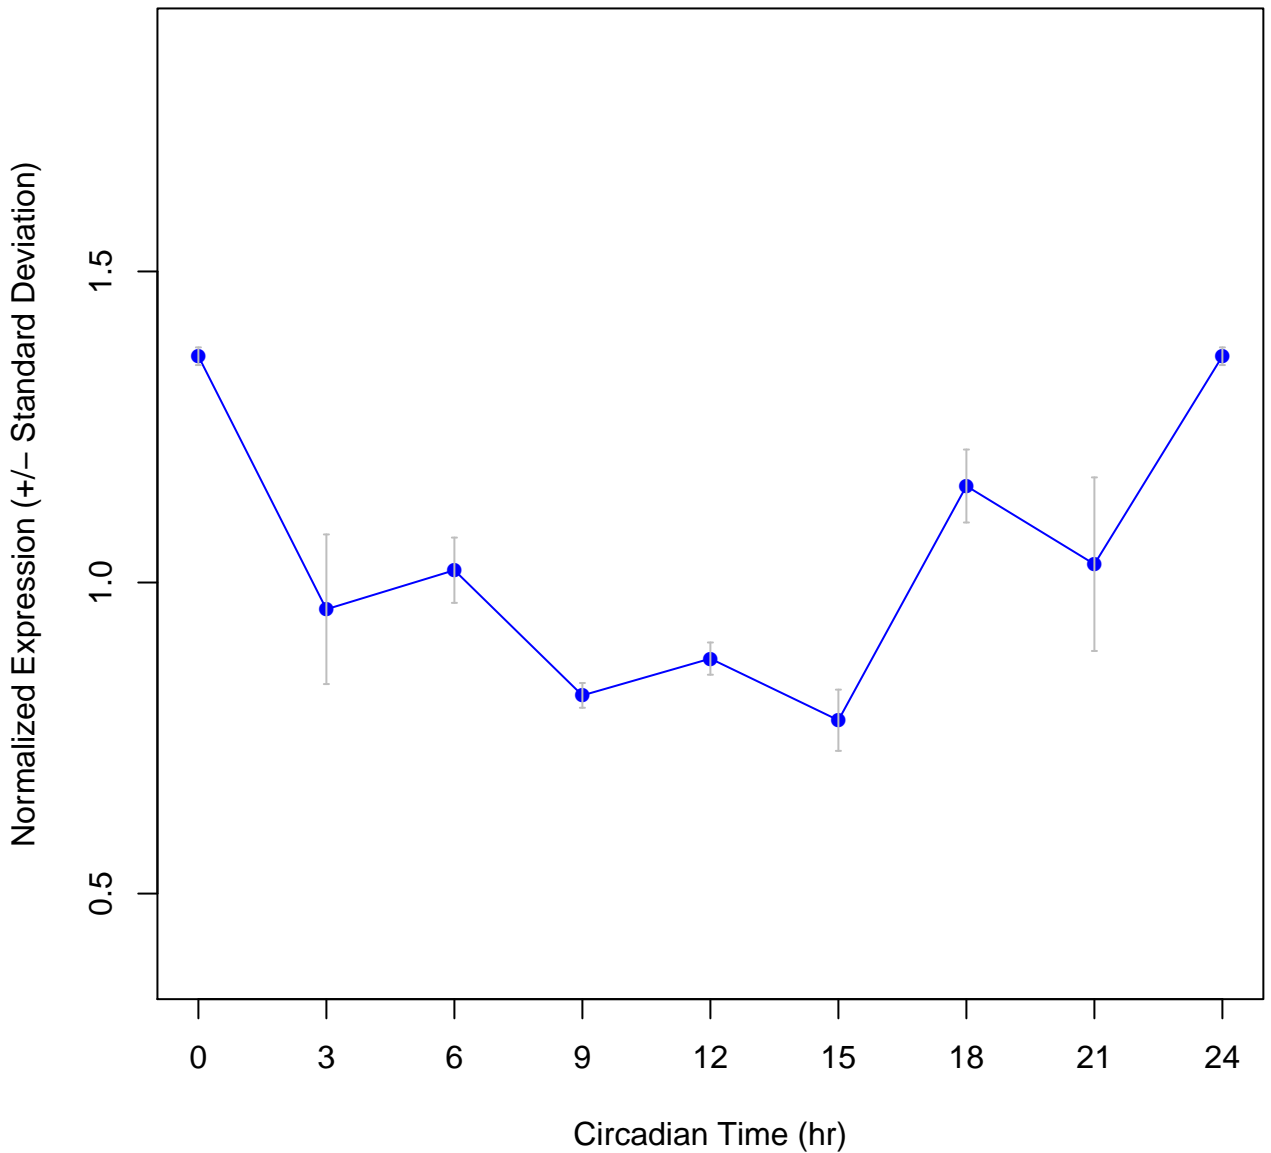

**Supplement Figure 4 rps6kb1**

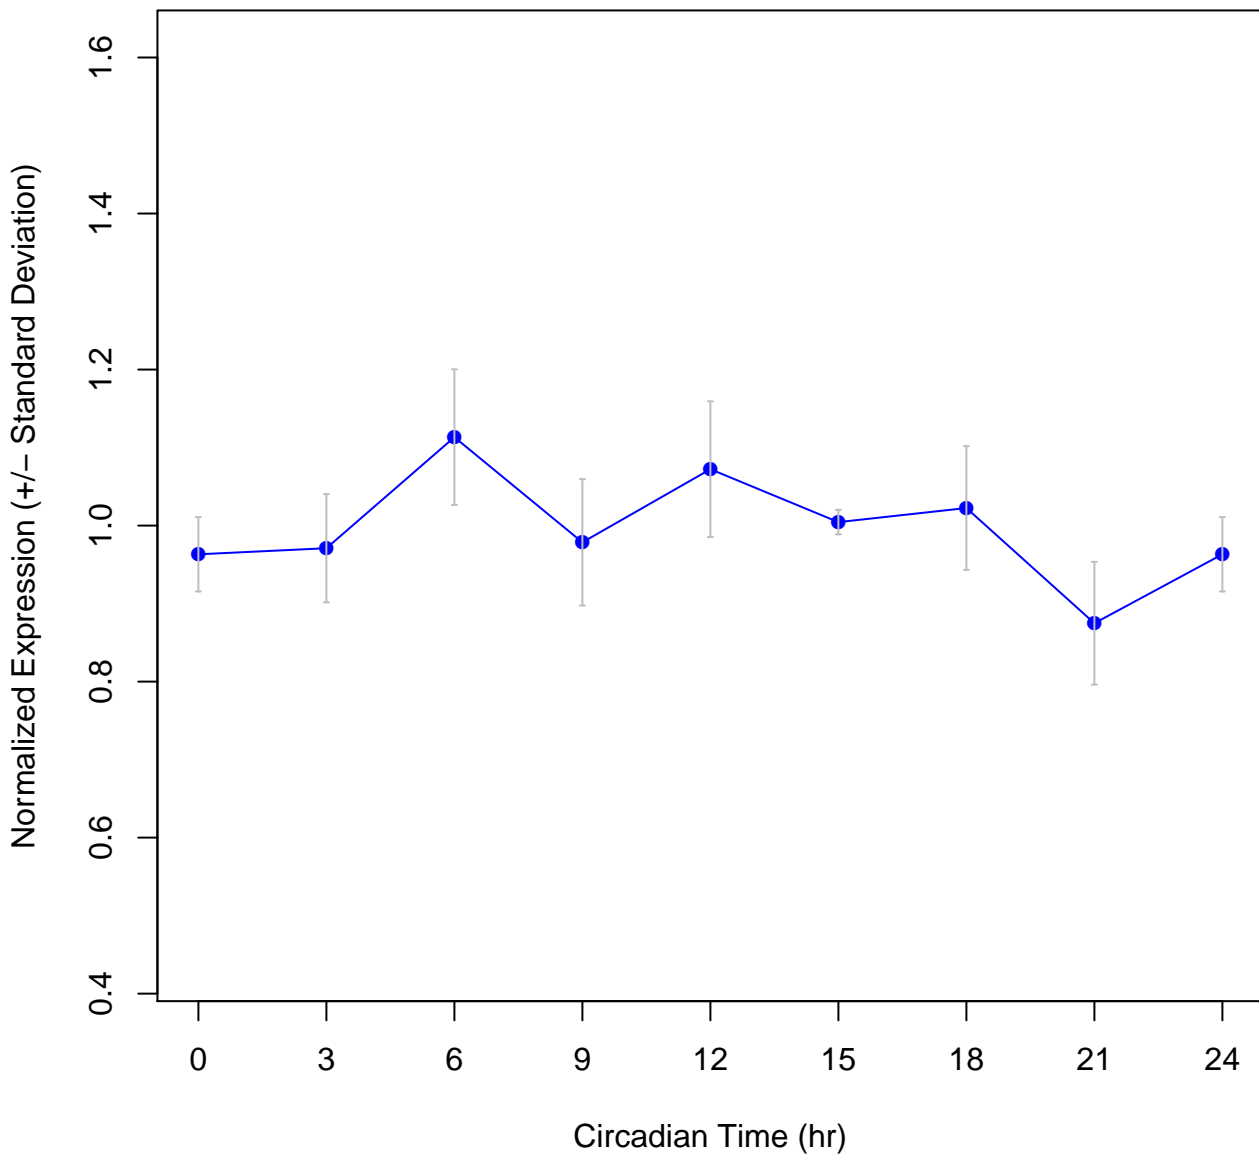

Supplement Figure 4 si\_ch211-114i13.12

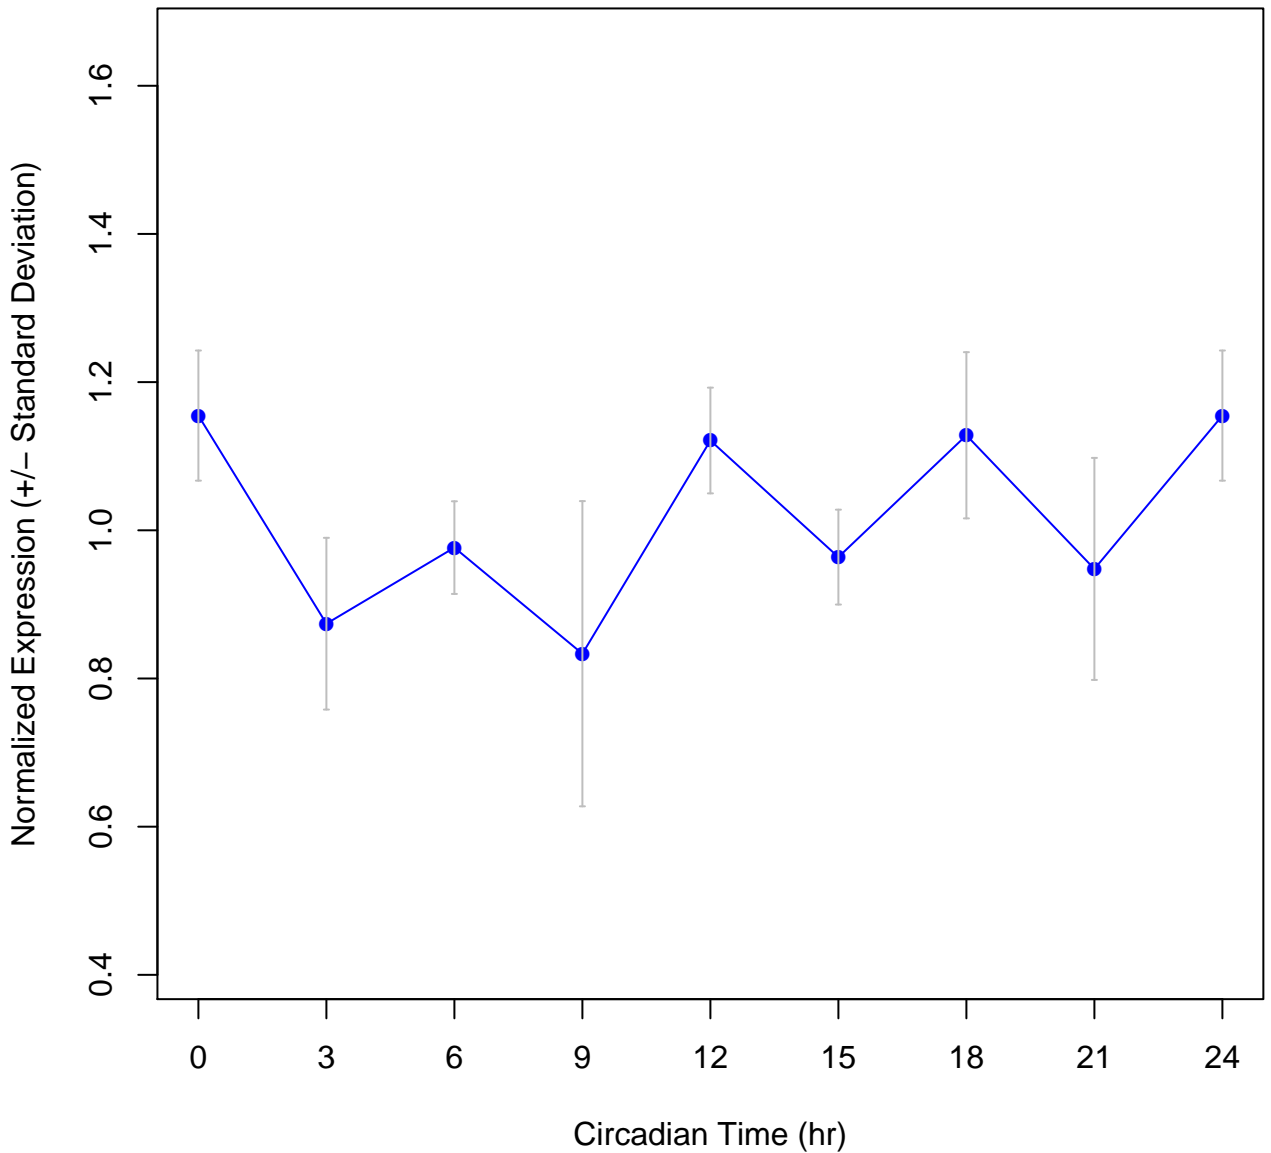



Supplement Figure 4 si\_ch211-199o1.2

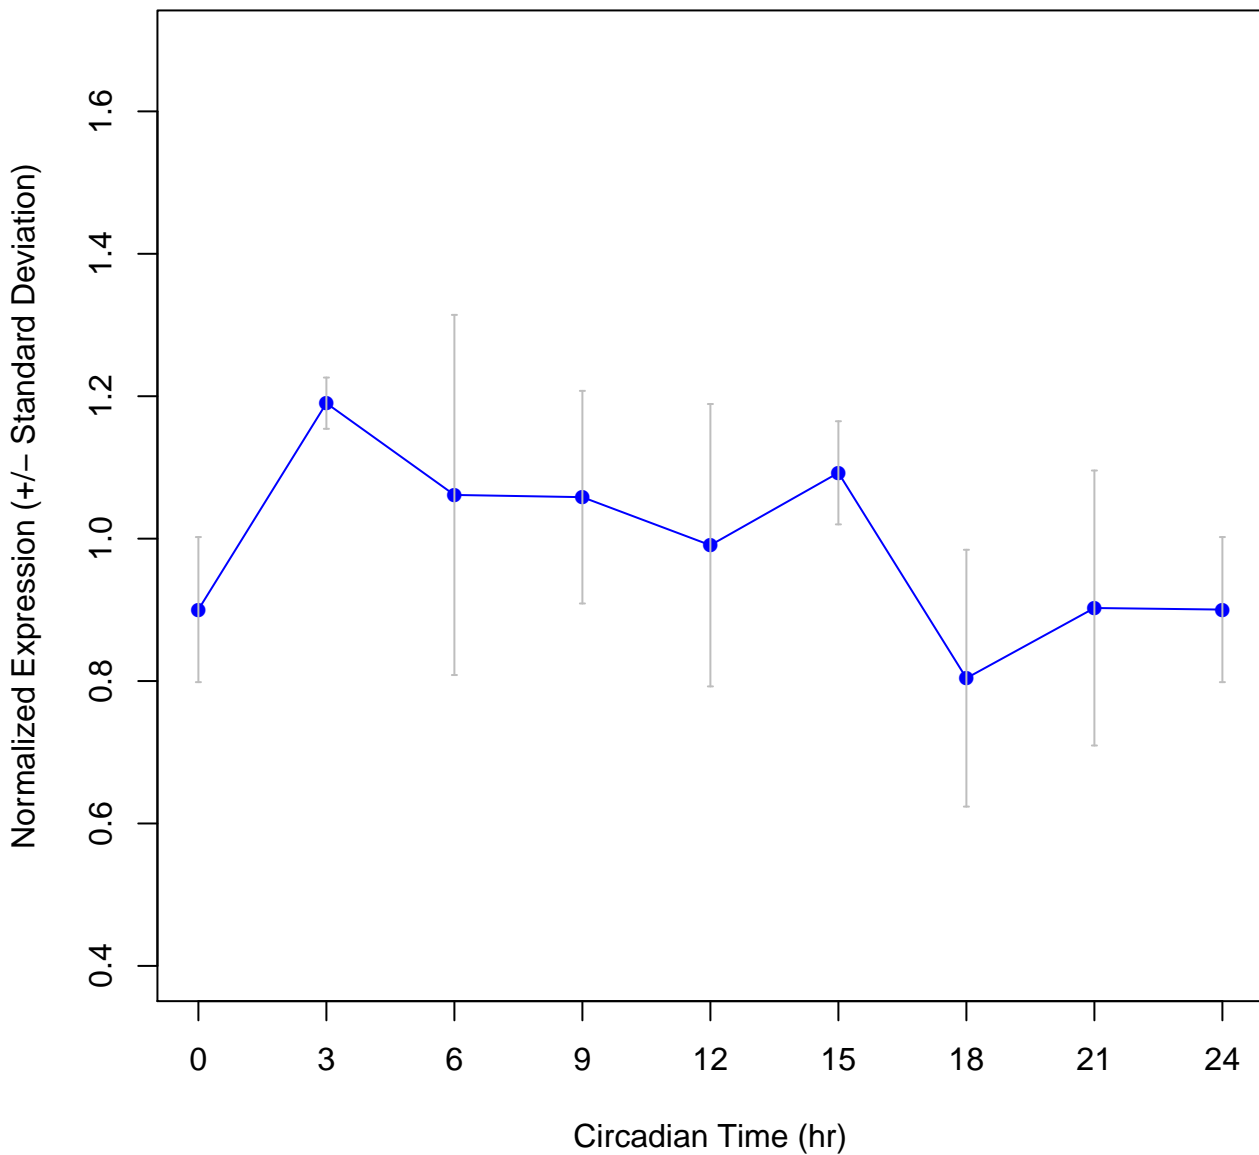

## Supplement Figure 4 sigirr

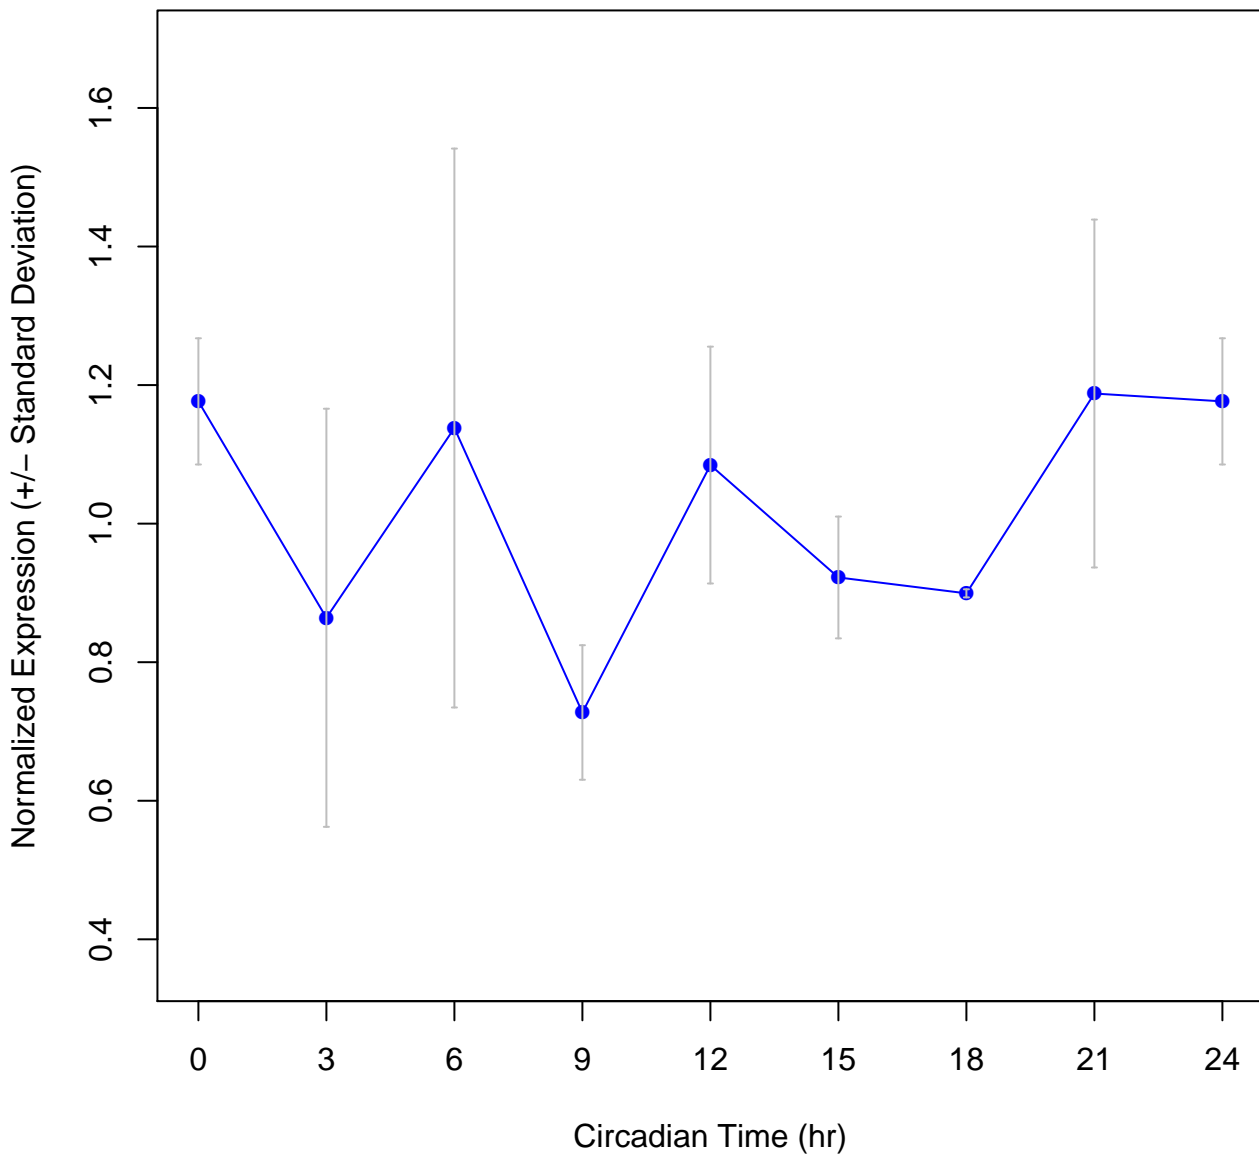

**Supplement Figure 4 sirt1**

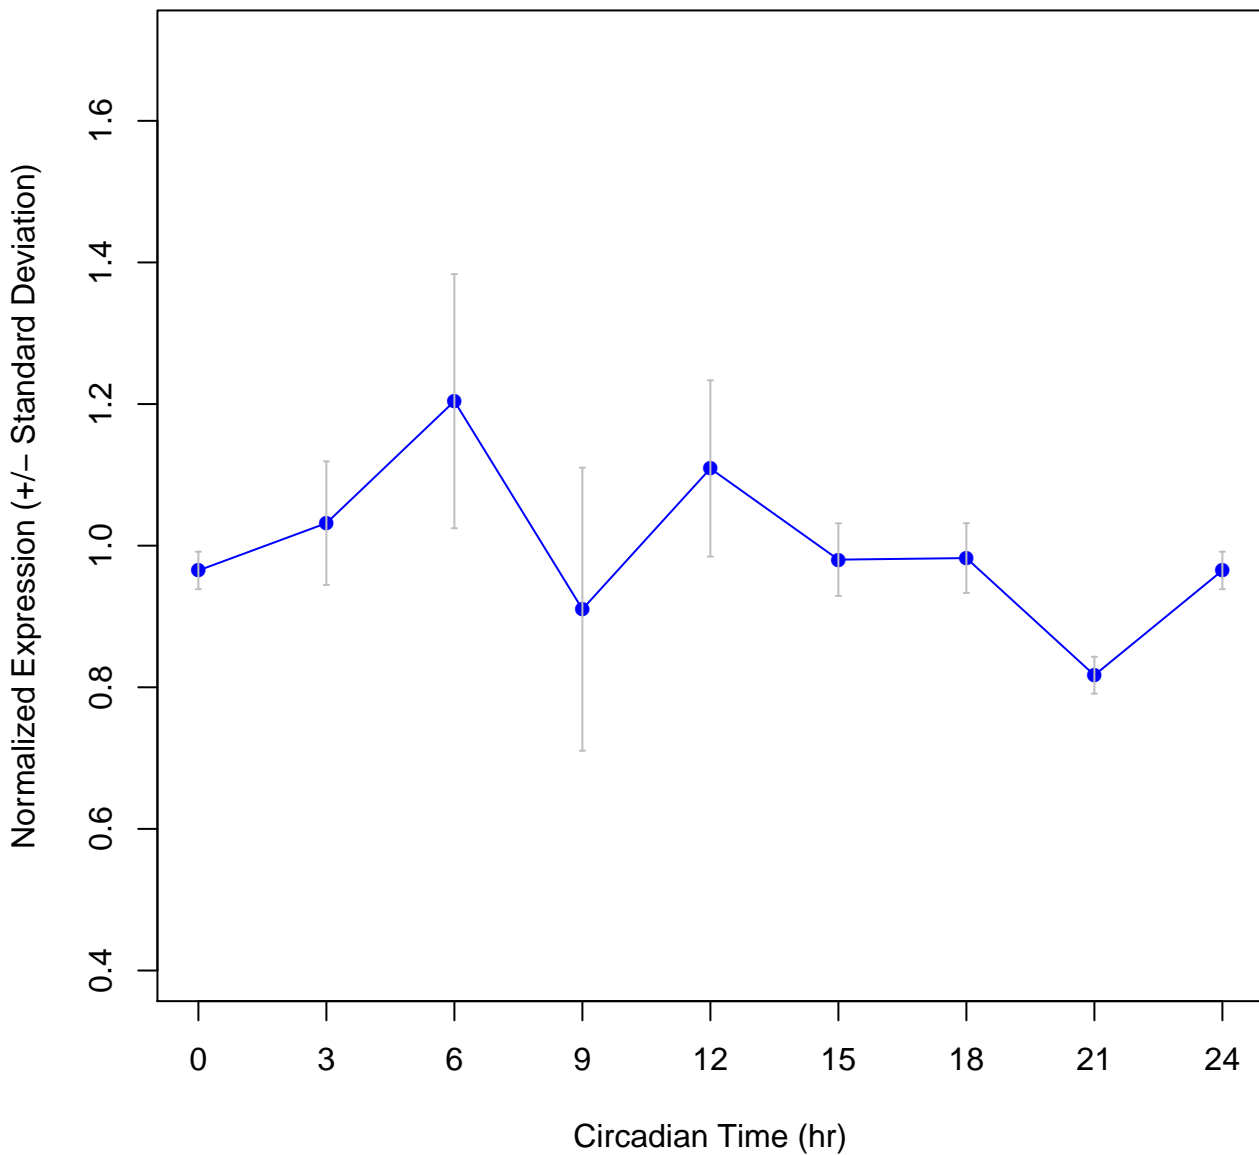

**Supplement Figure 4 six3**

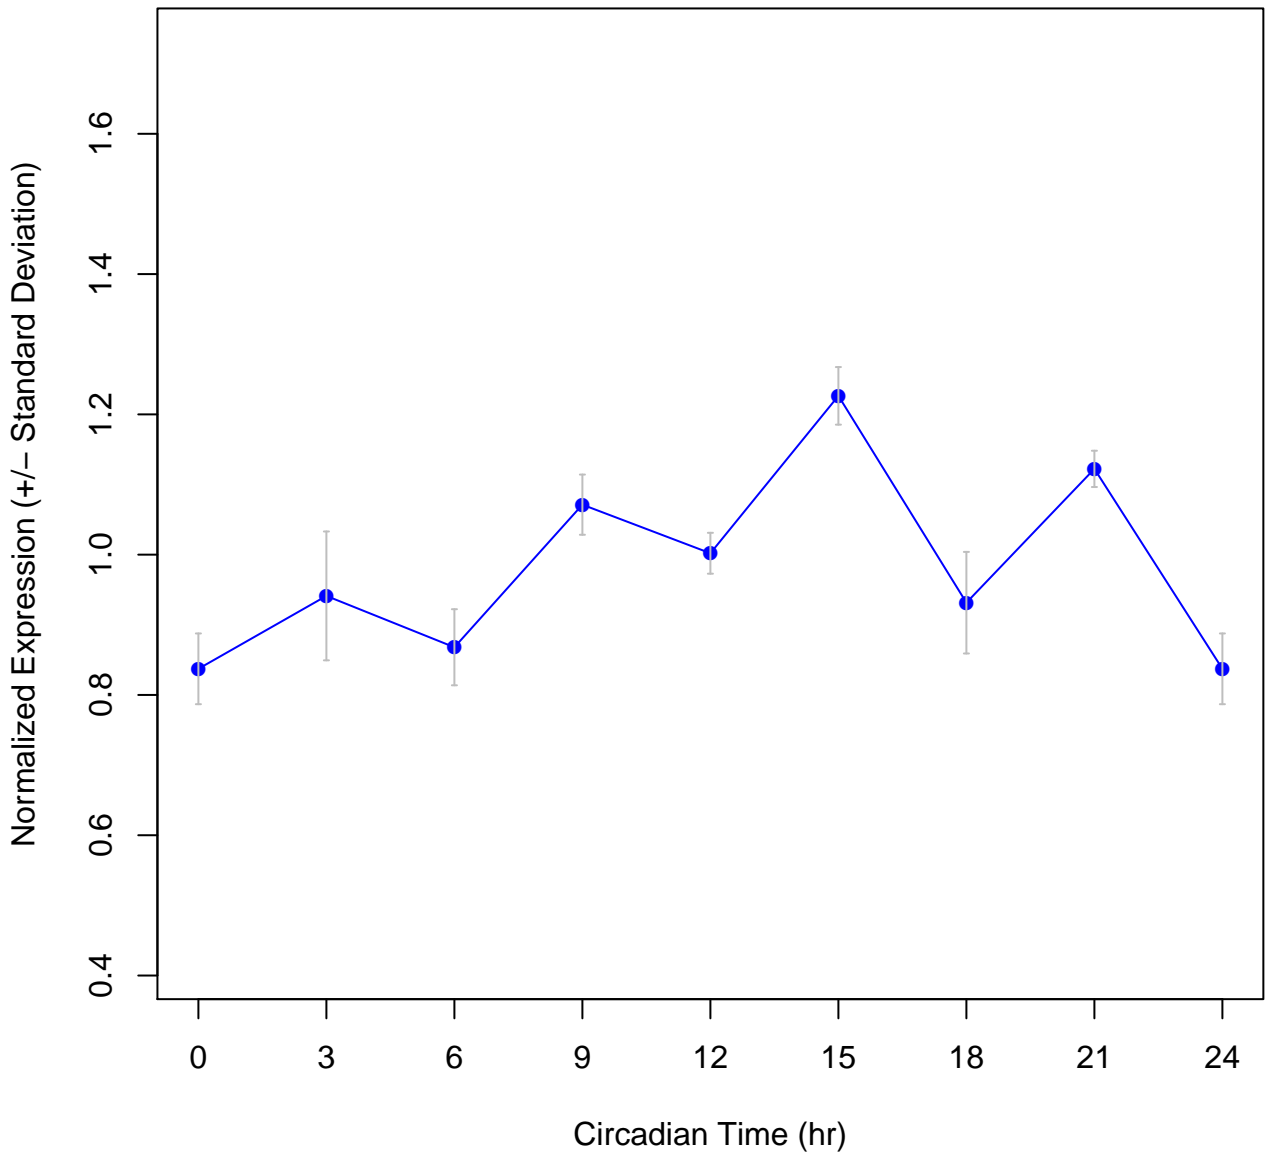

Supplement Figure 4 *skp1*

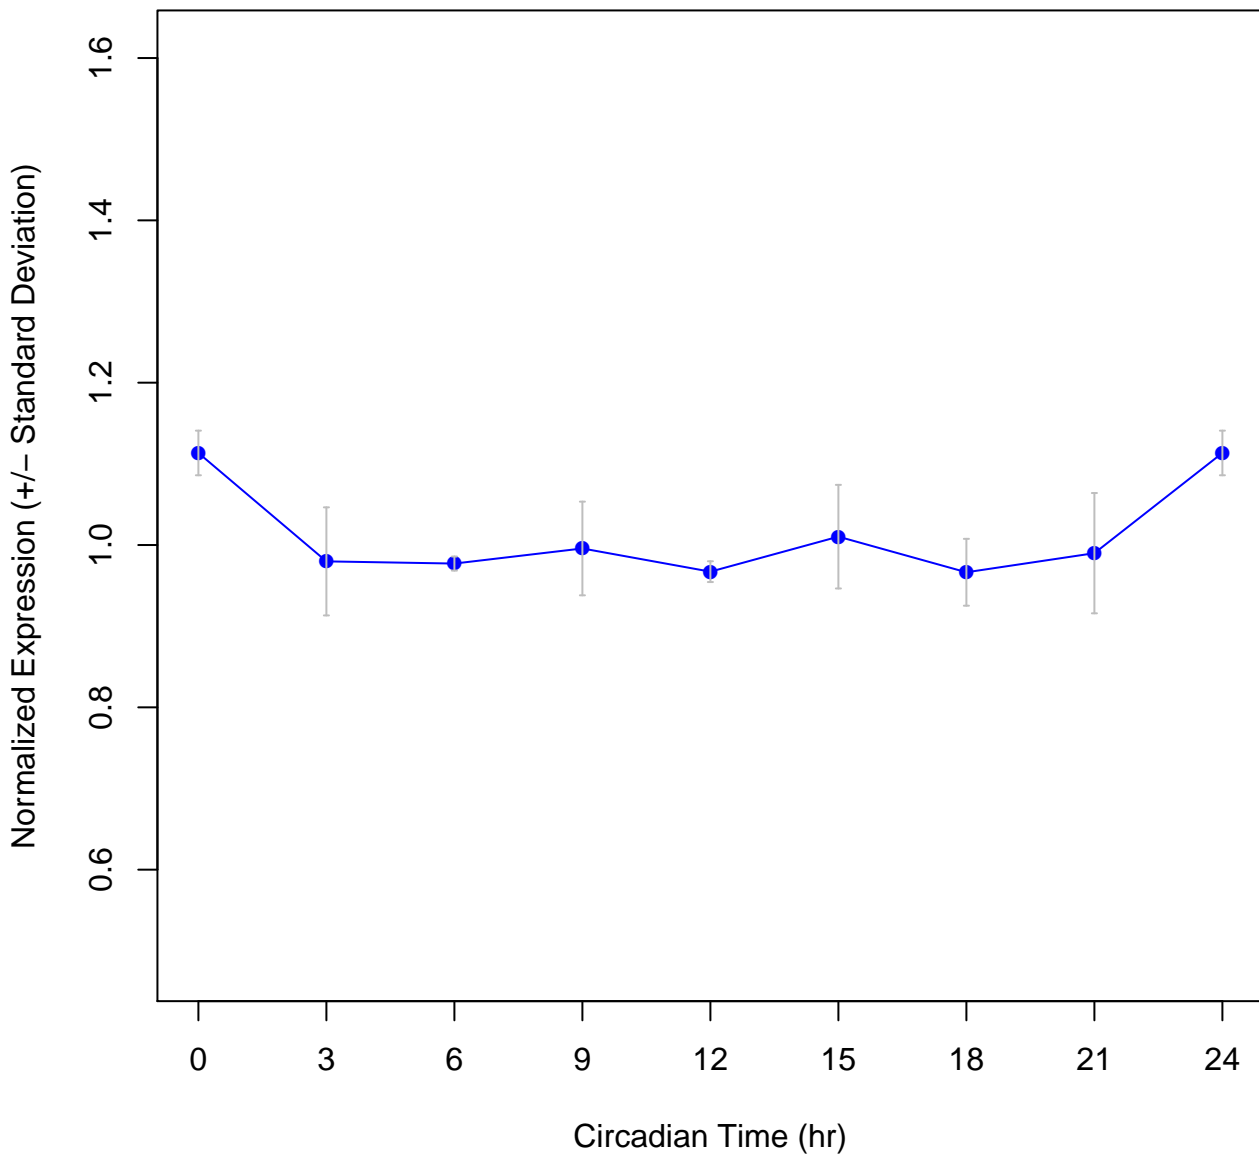

Supplement Figure 4 slc2a4

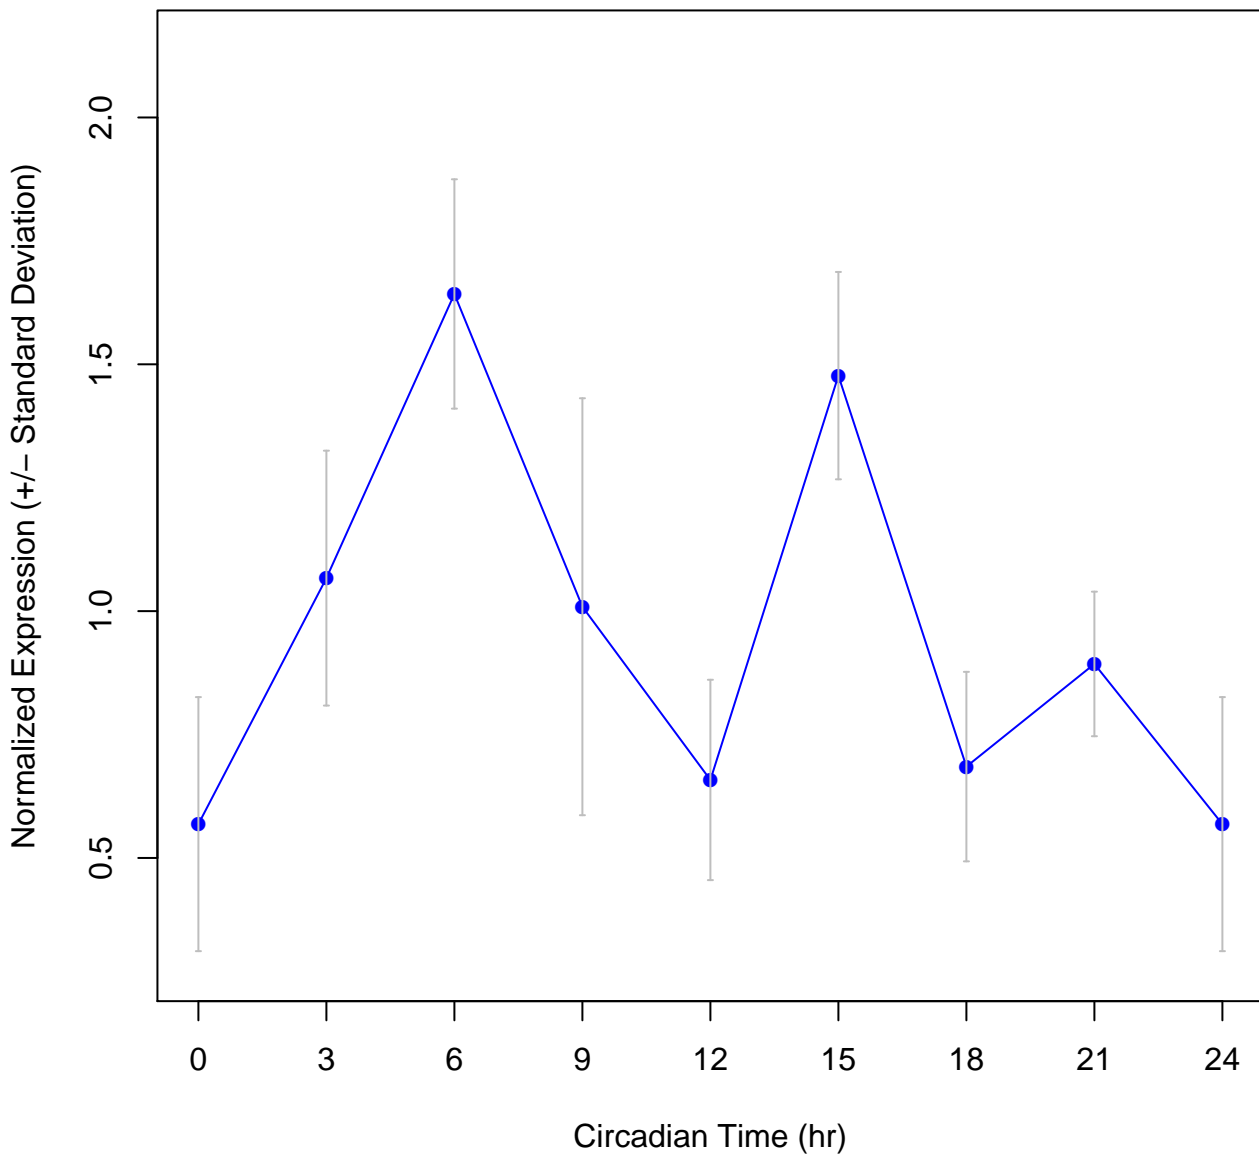

Supplement Figure 4 slc2a4rg

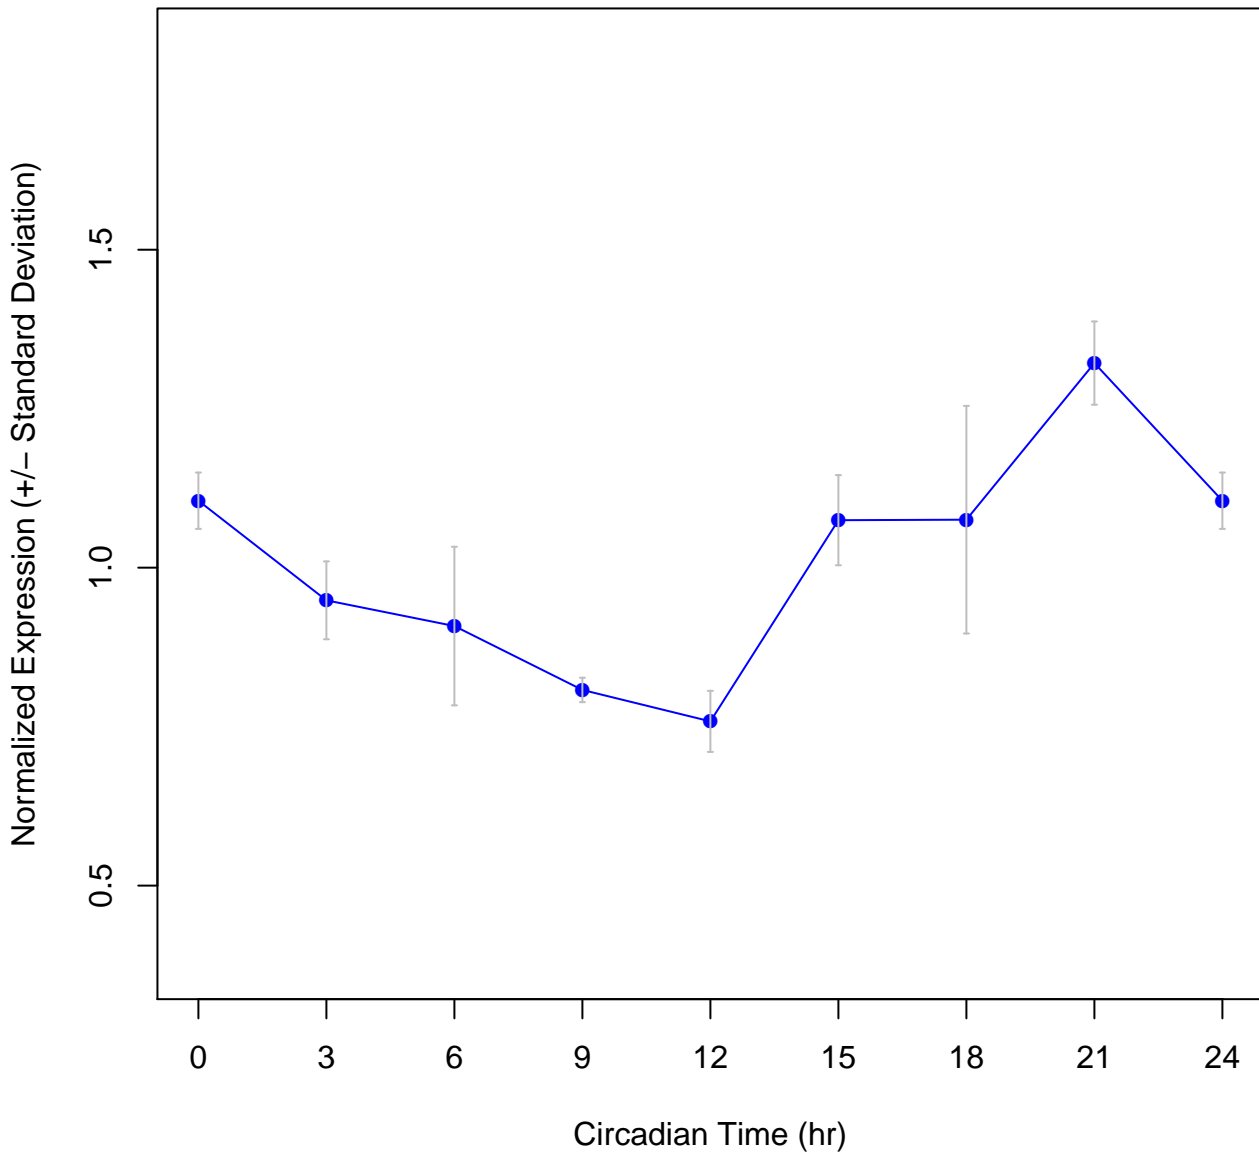

Supplement Figure 4 snca

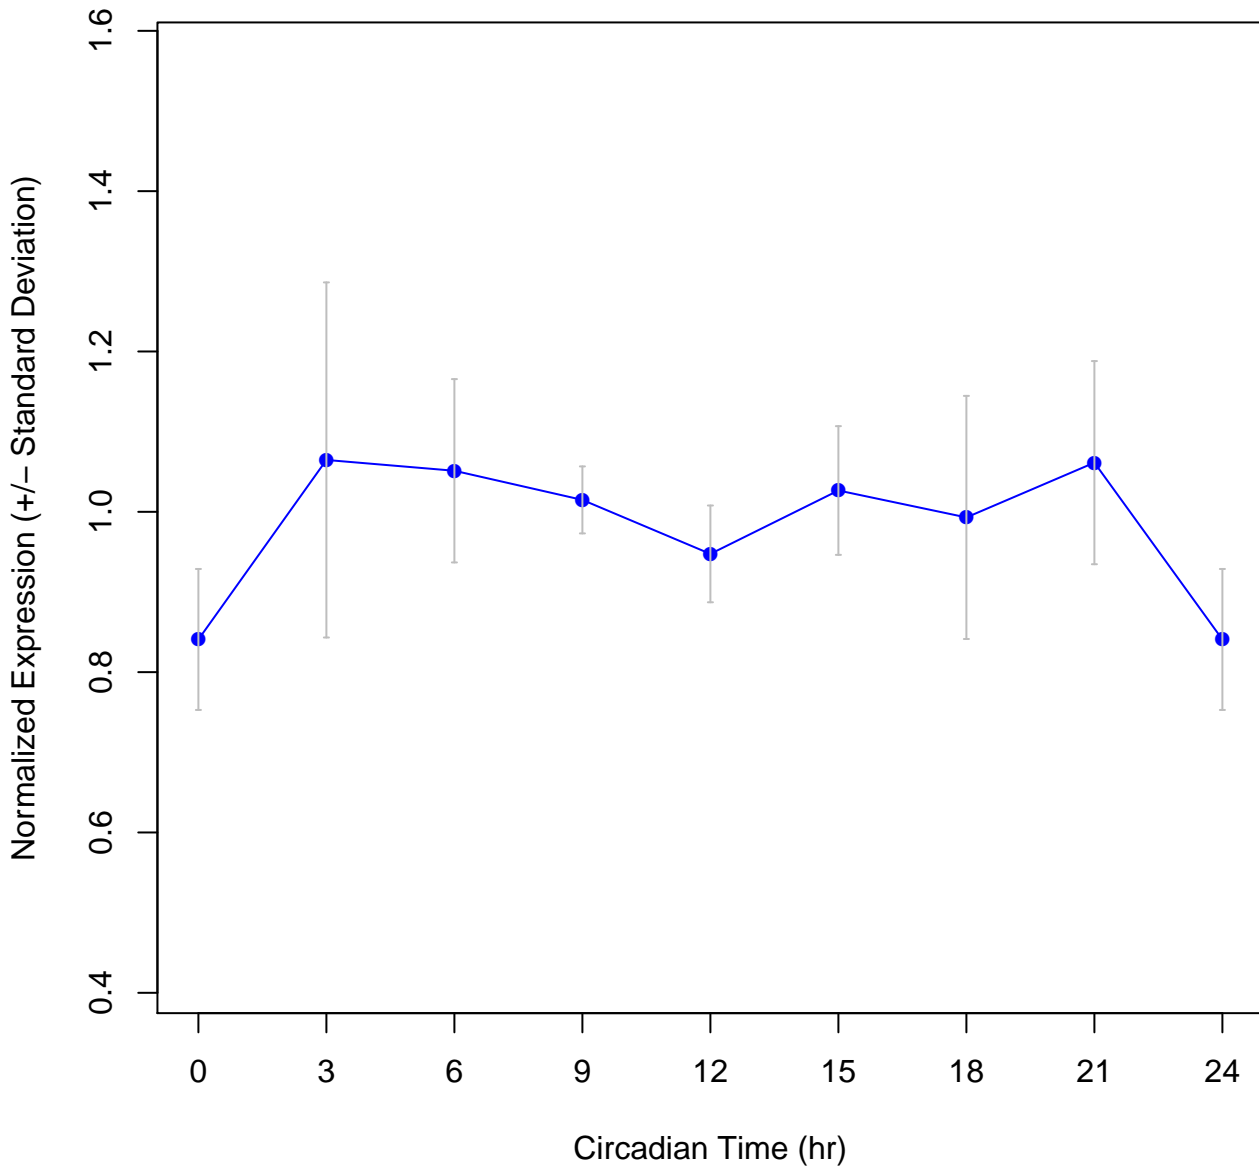



## Supplement Figure 4 sort1

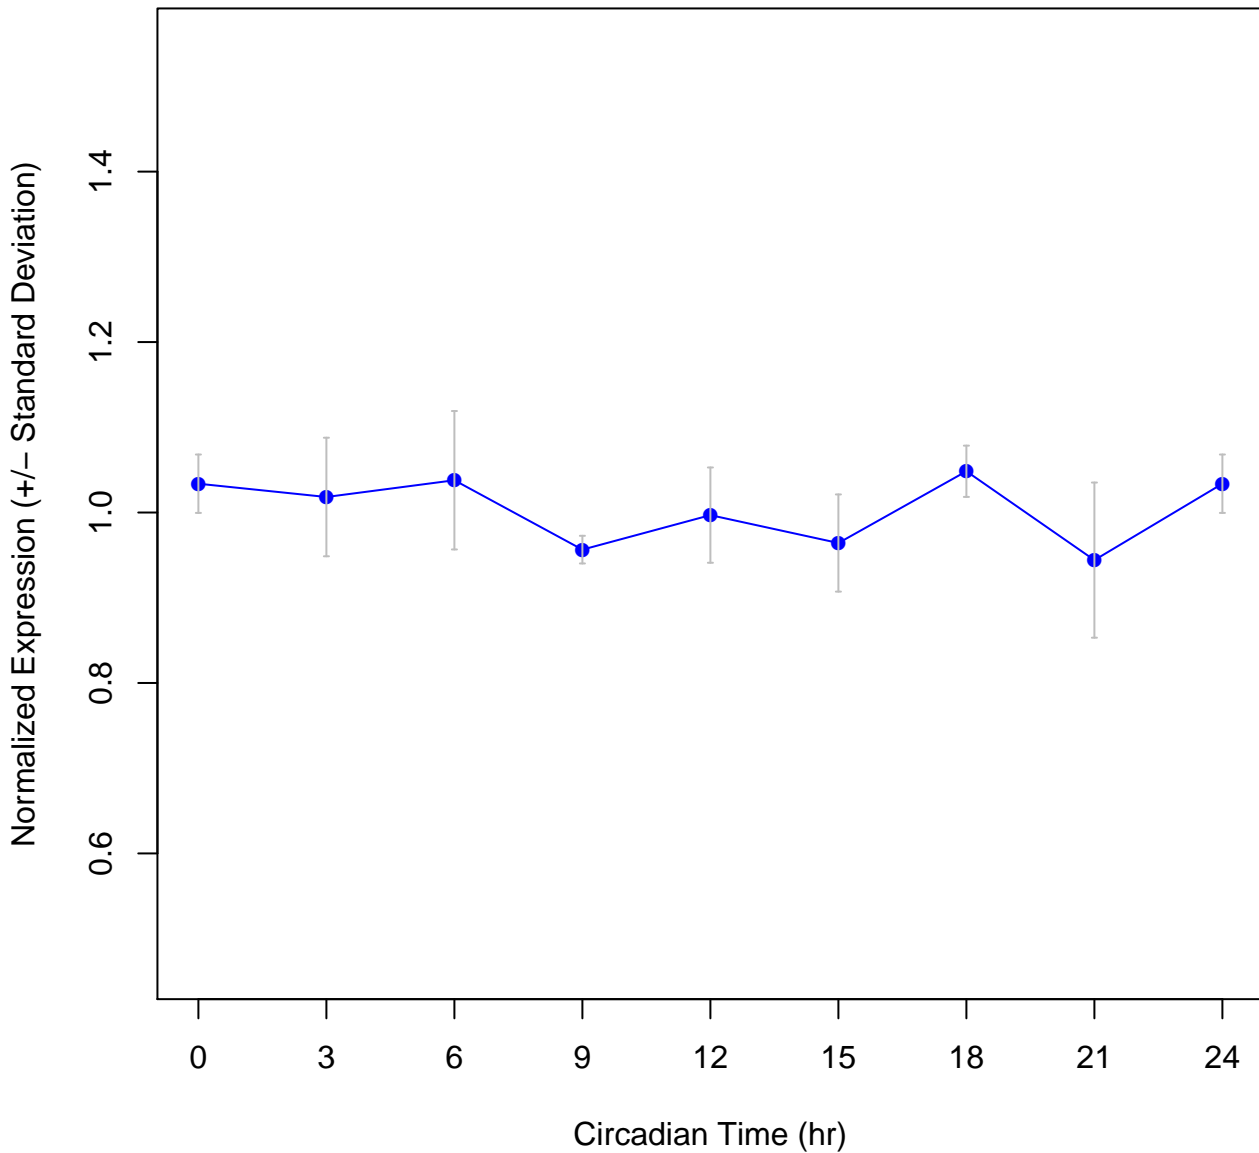

**Supplement Figure 4 sox10**

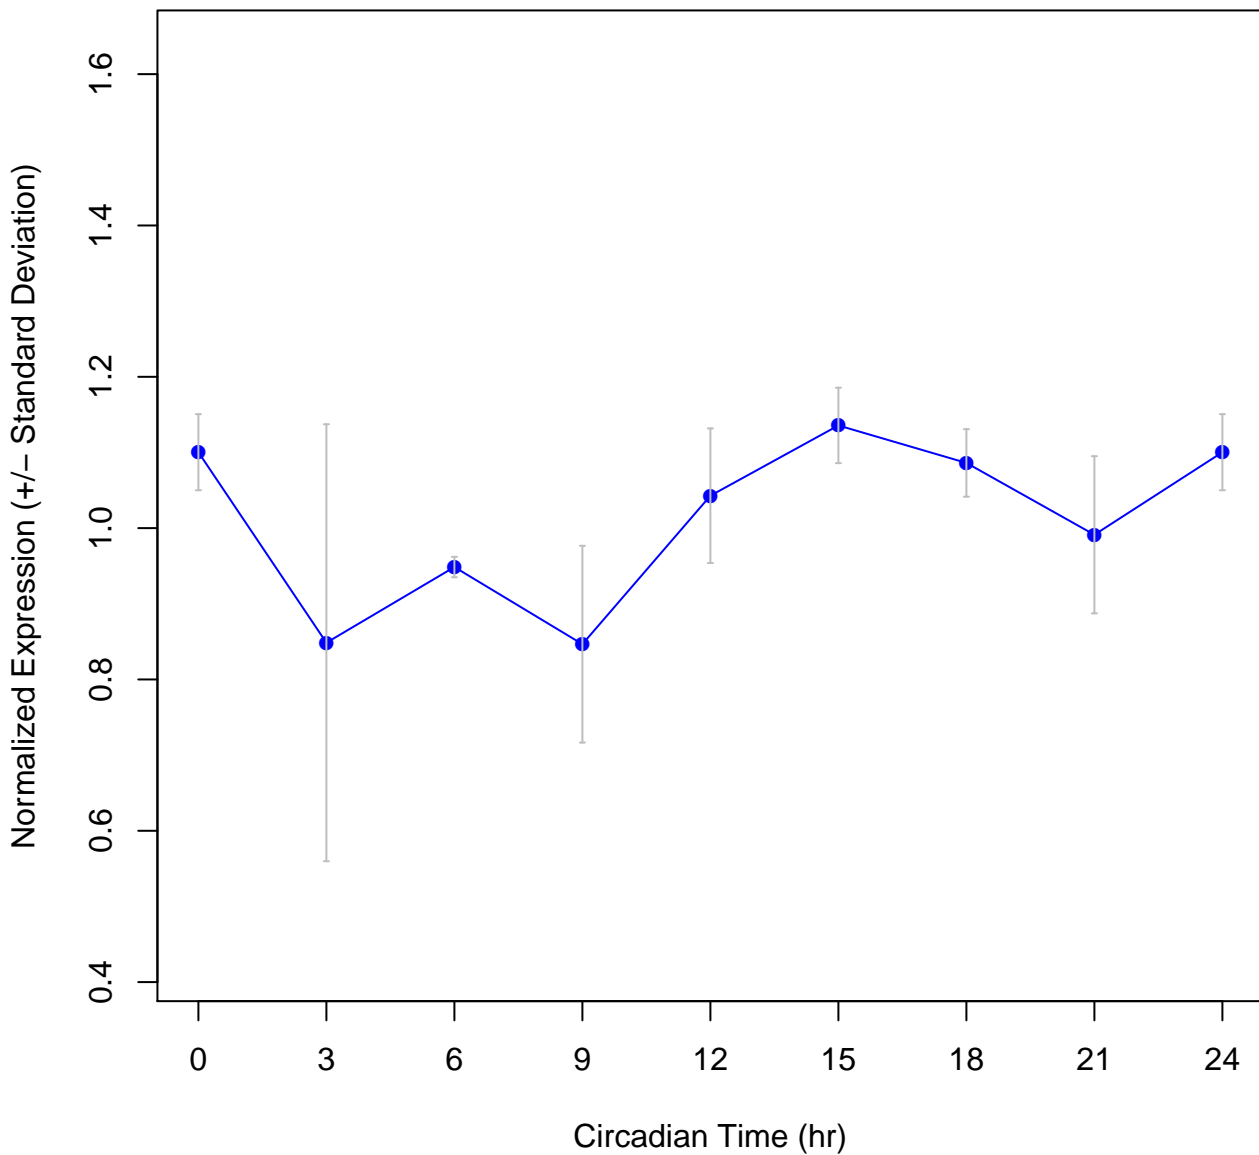

**Supplement Figure 4 sox8**

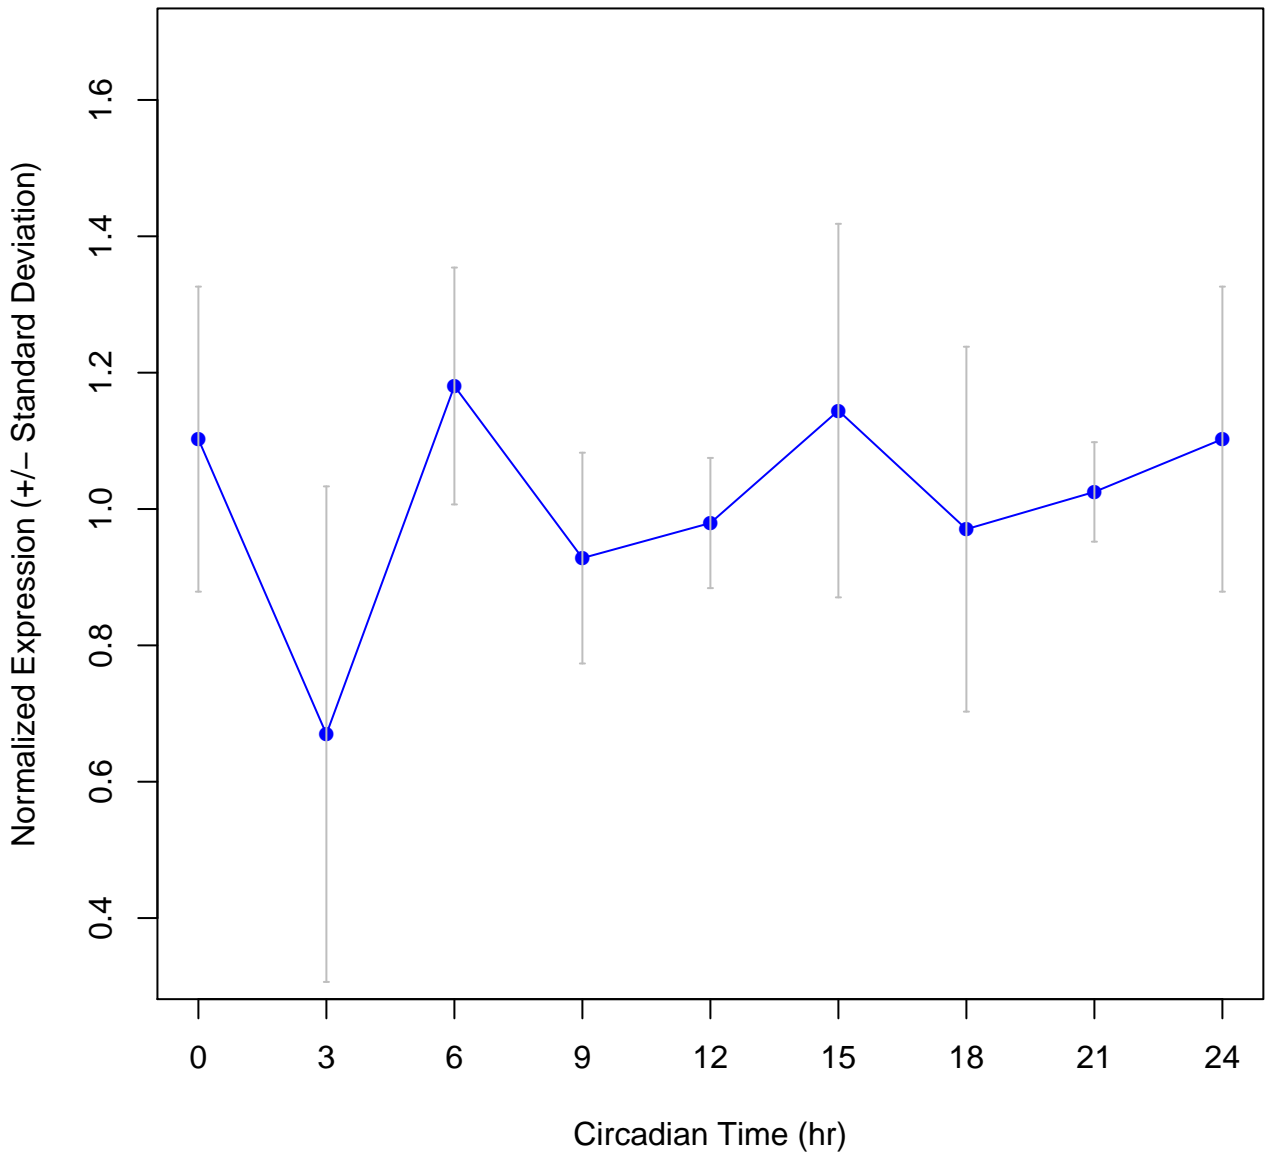

Supplement Figure 4 spc25

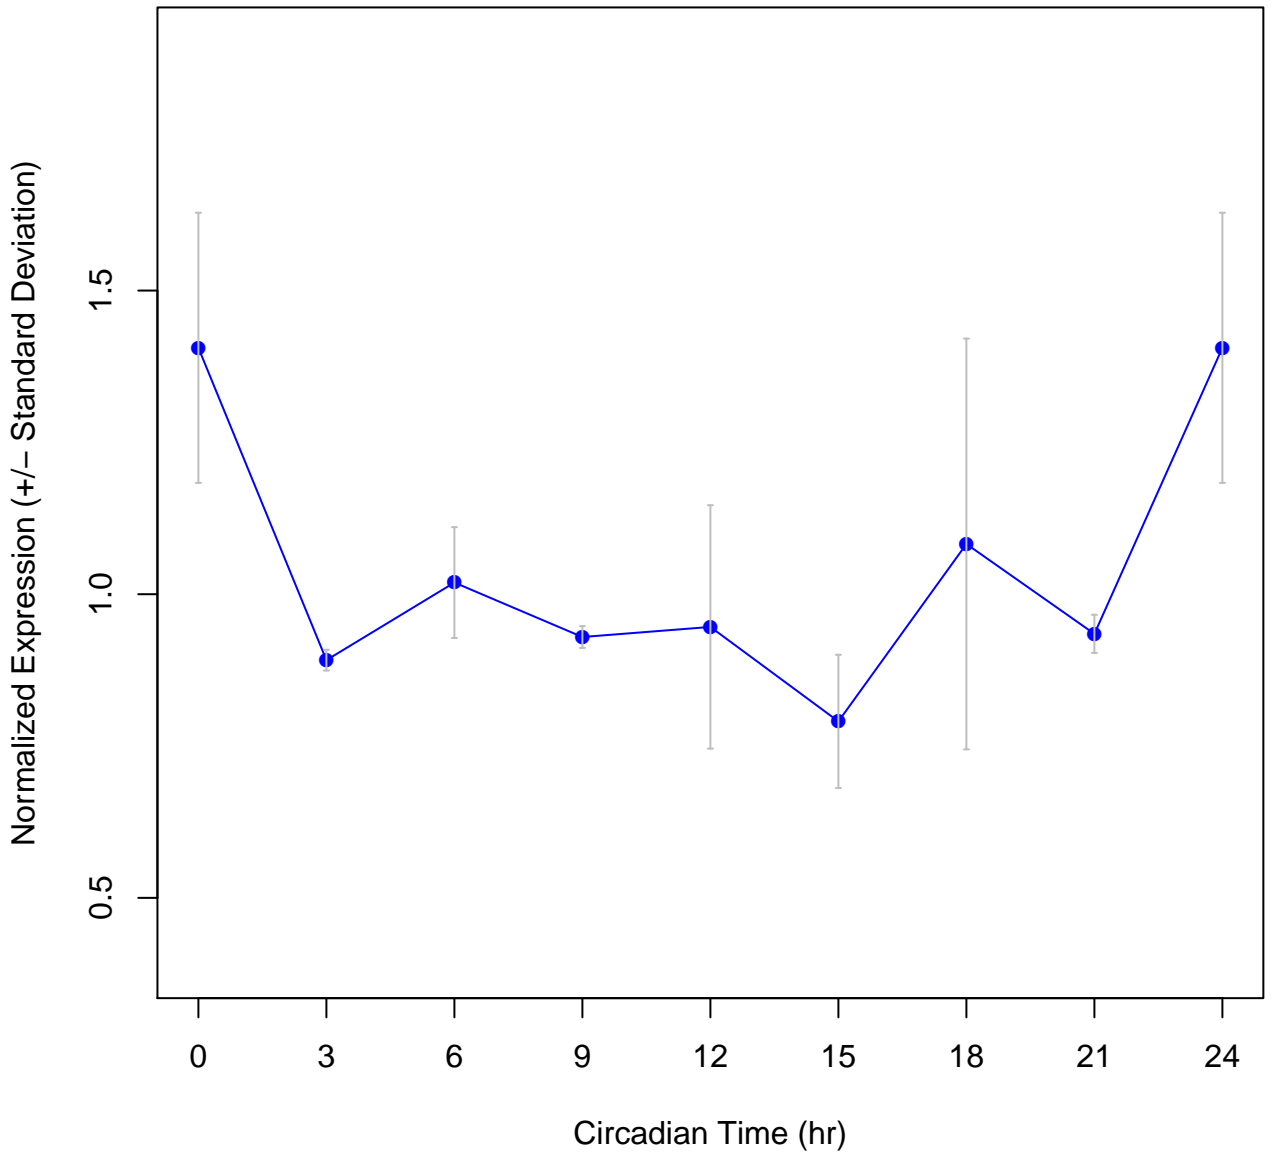

**Supplement Figure 4 sreb1**

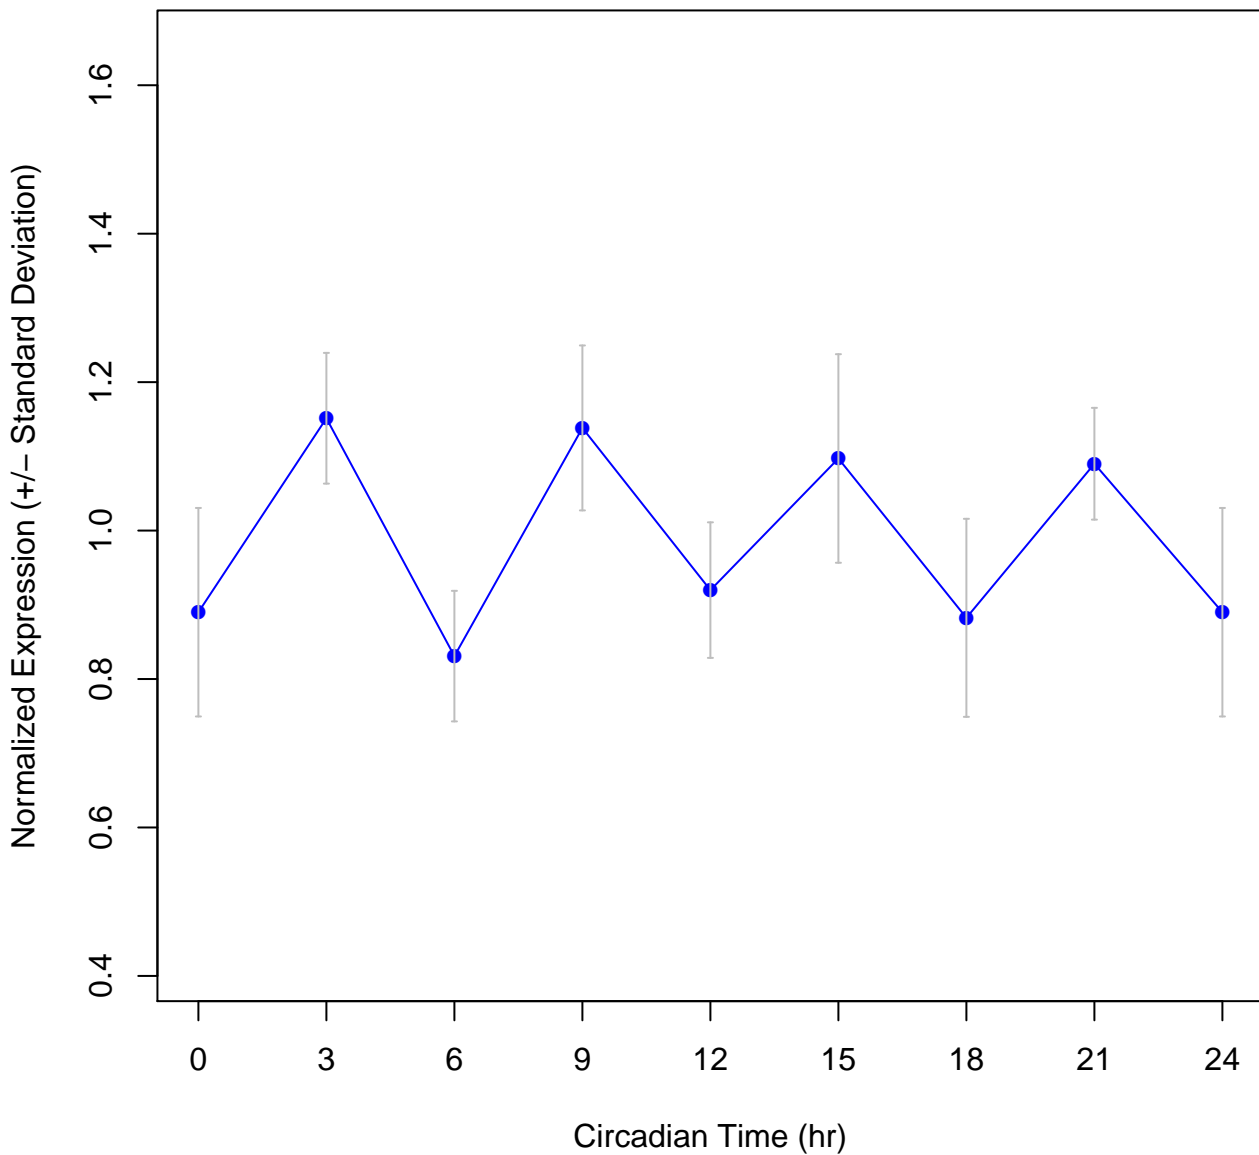

Supplement Figure 4 sybu

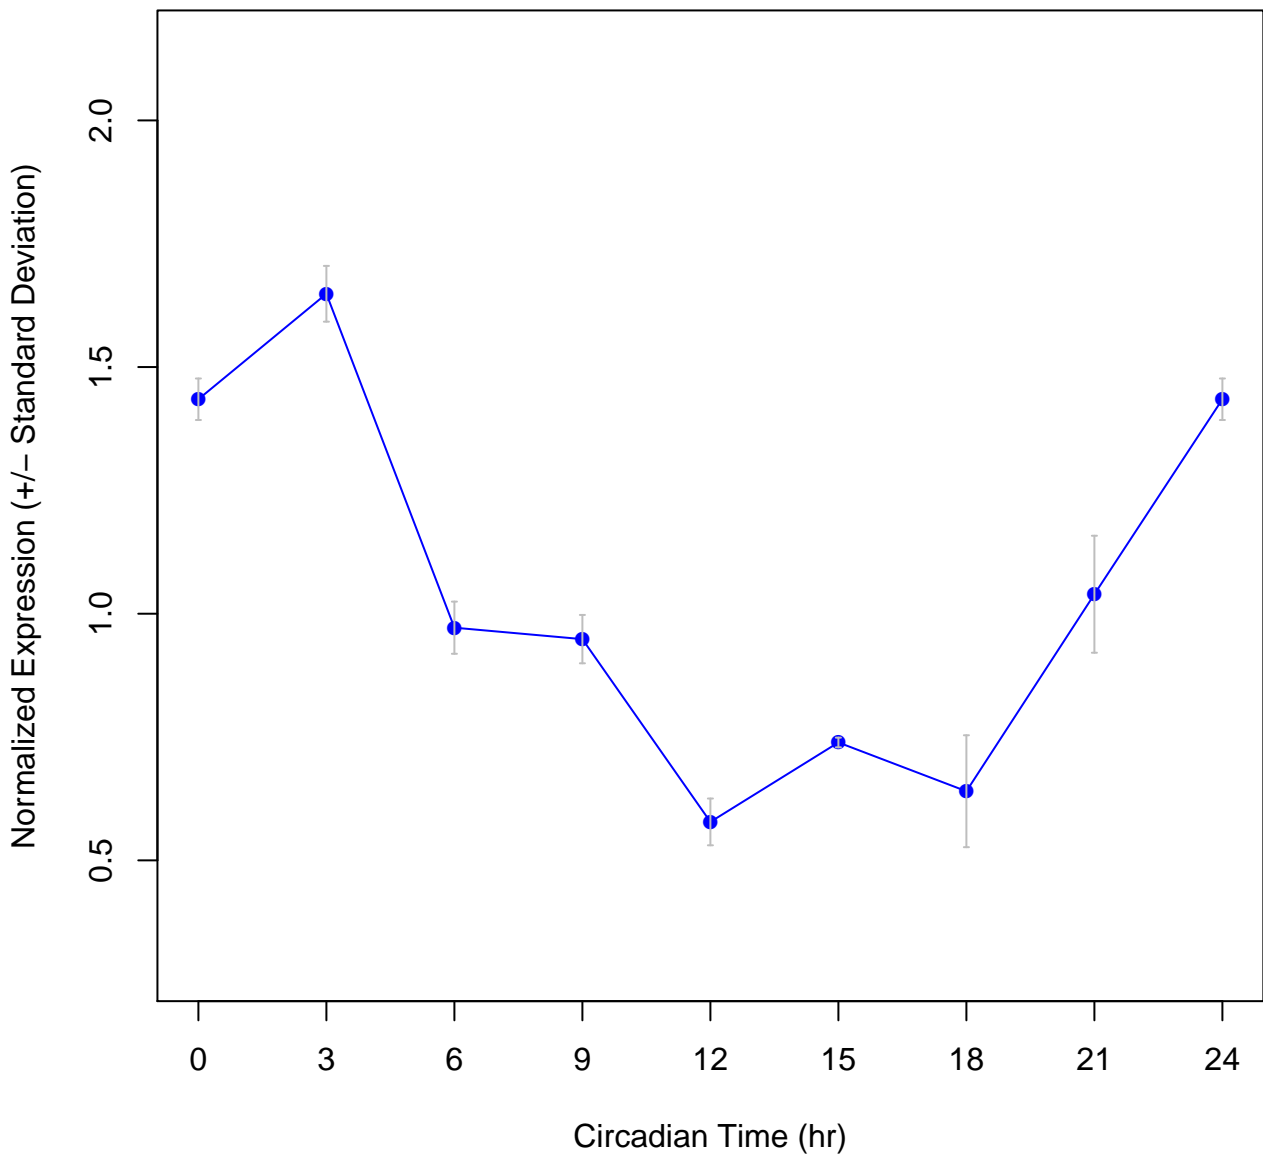

### Supplement Figure 4 tgm8

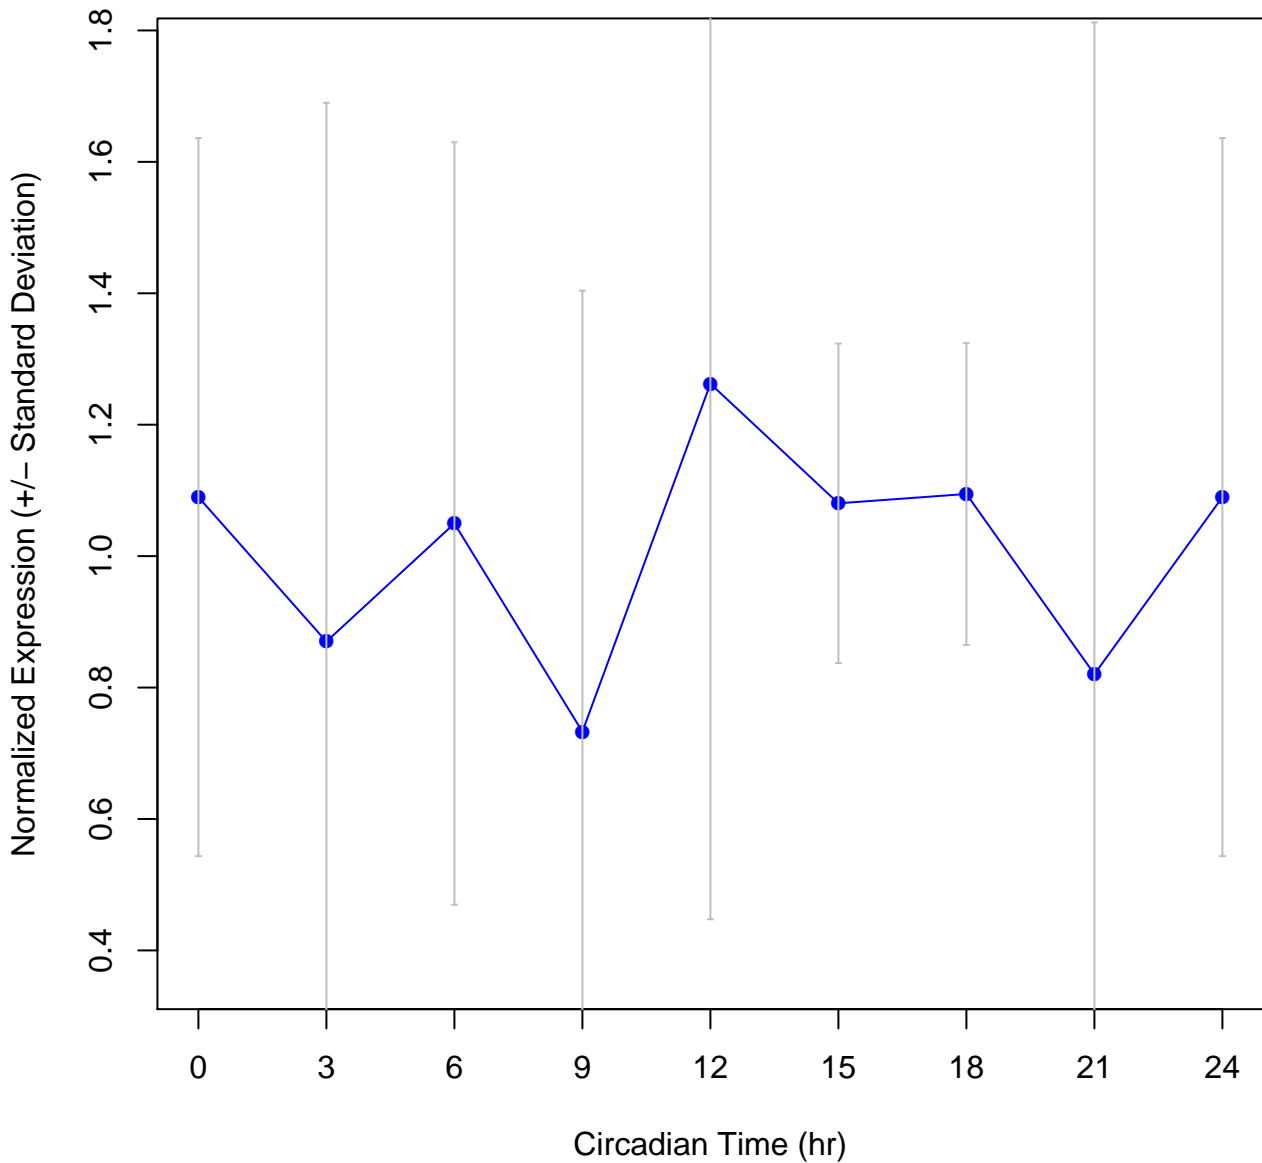

Supplement Figure 4 thbs1

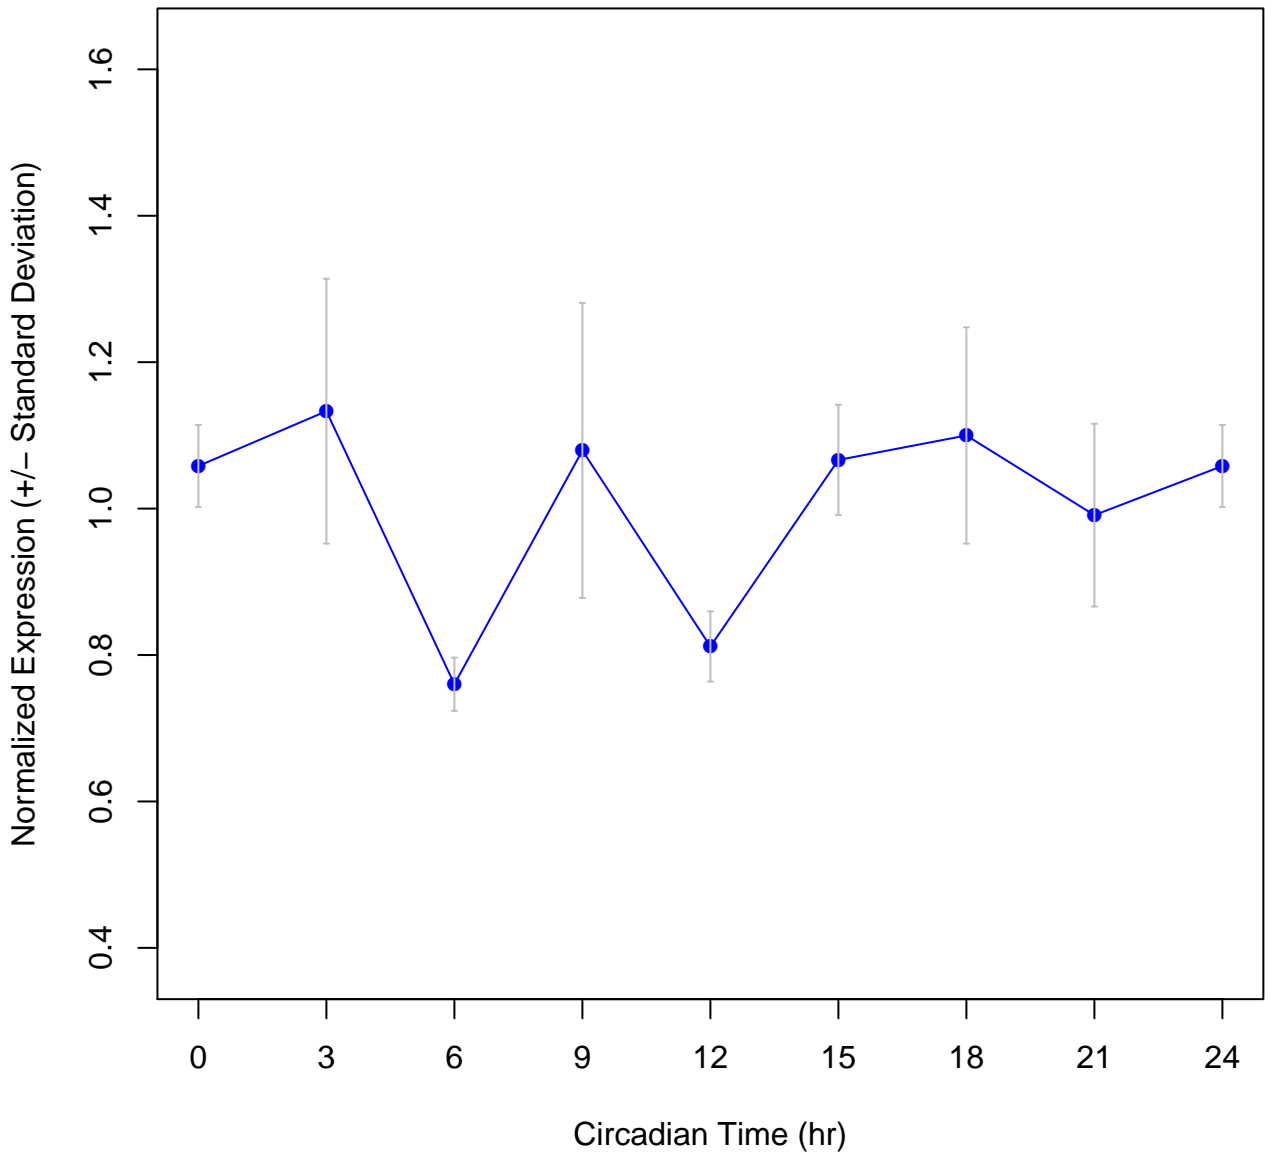



Supplement Figure 4 tim1

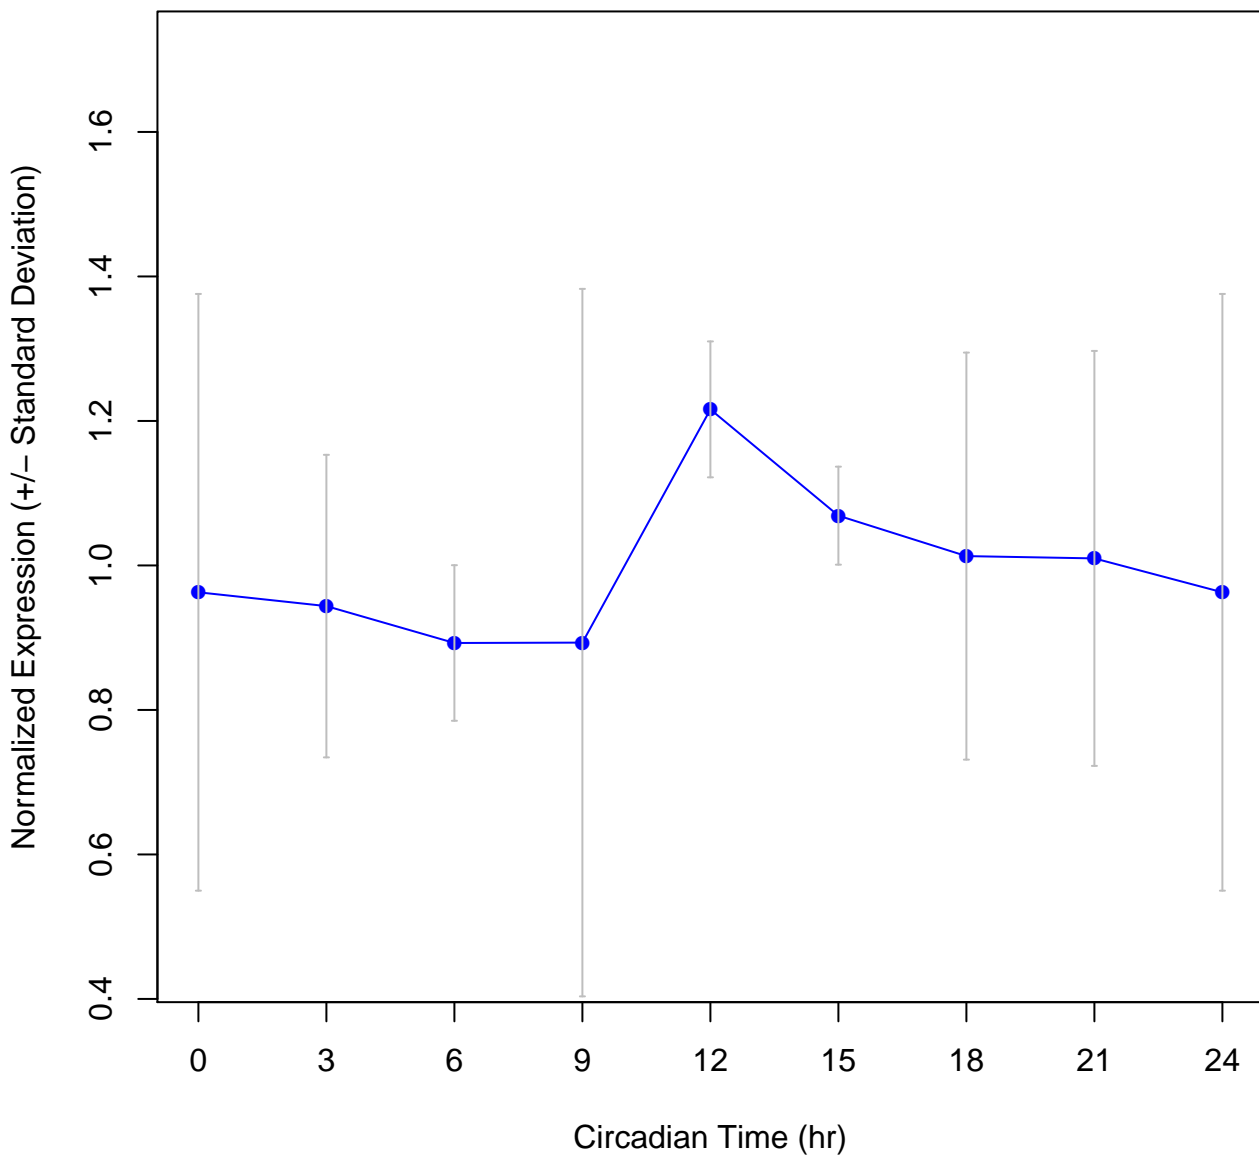

**Supplement Figure 4 tmem204**

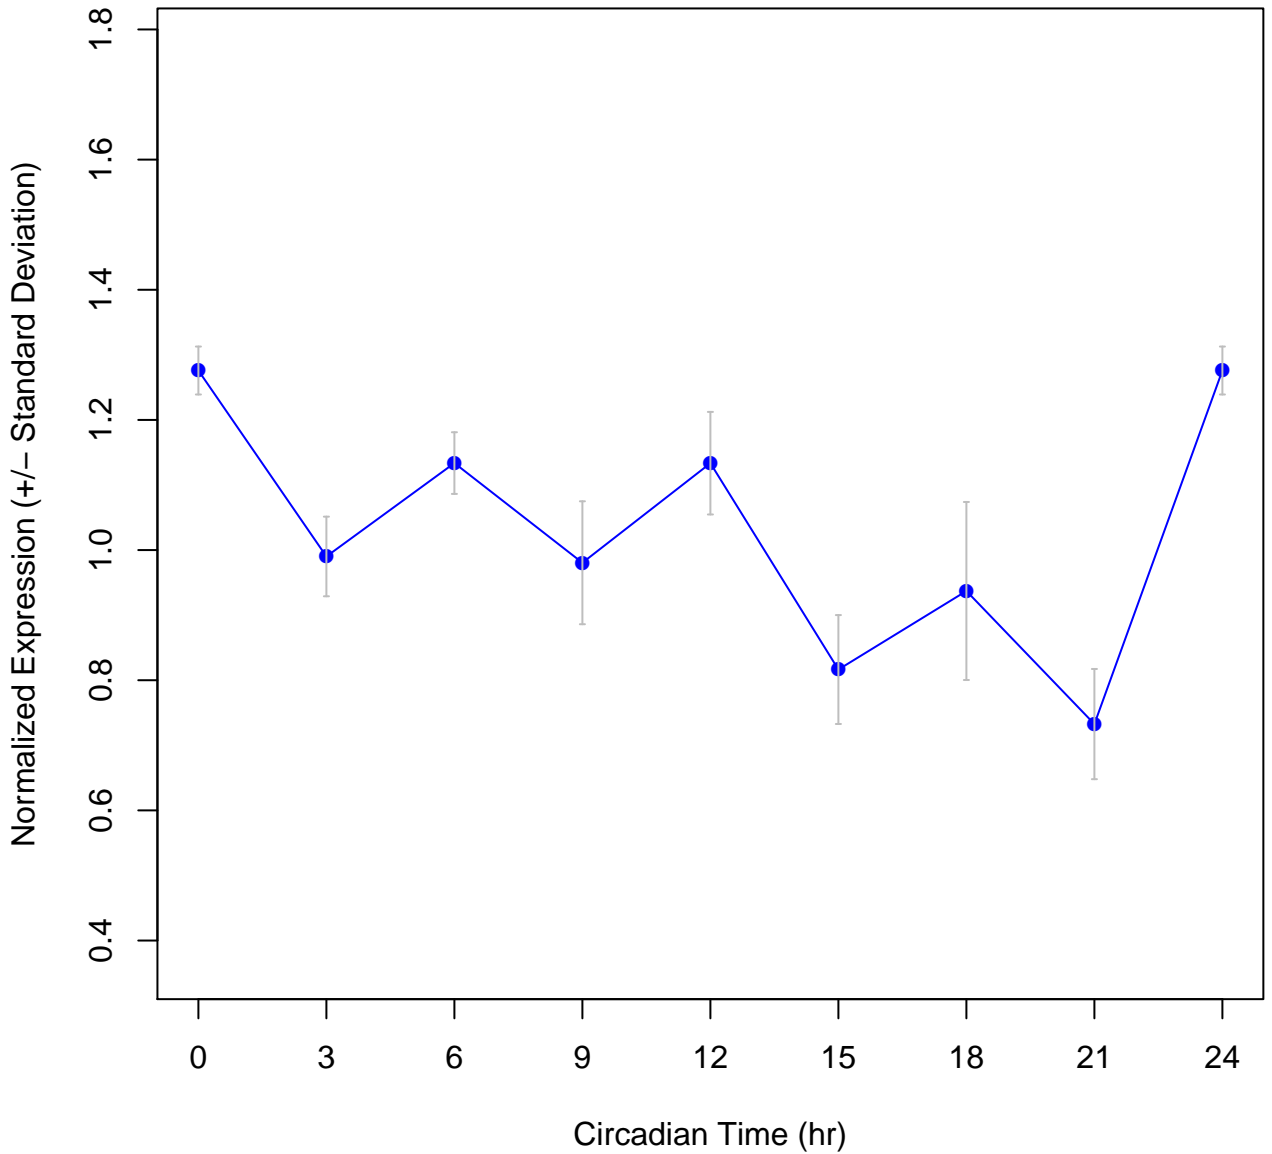

Supplement Figure 4 top2a

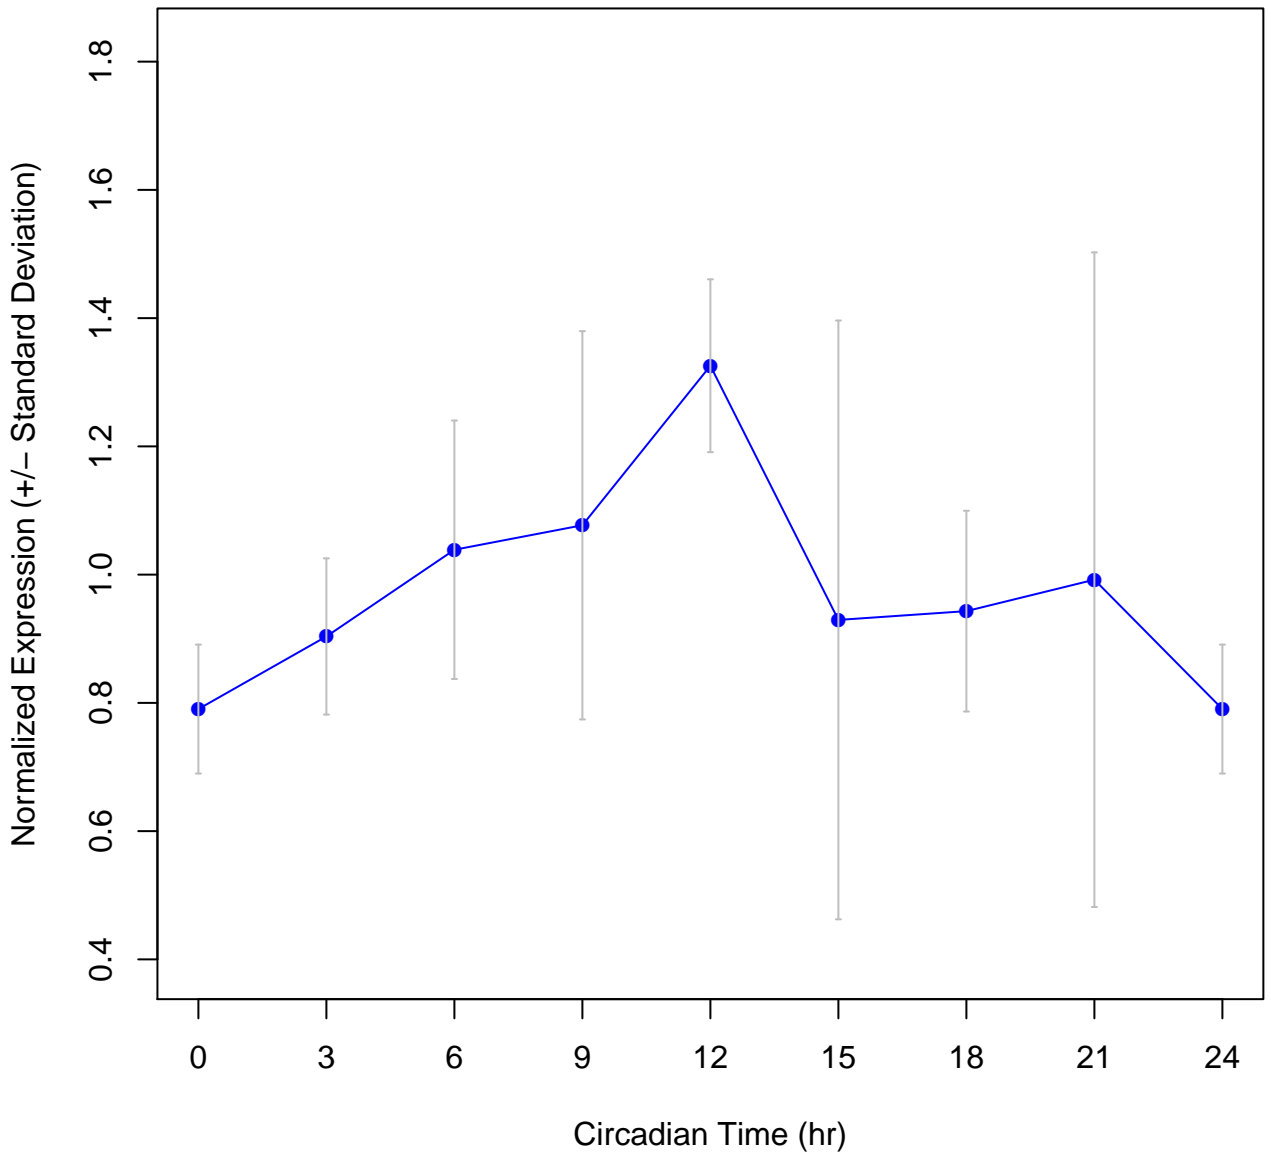

### Supplement Figure 4 tpm4

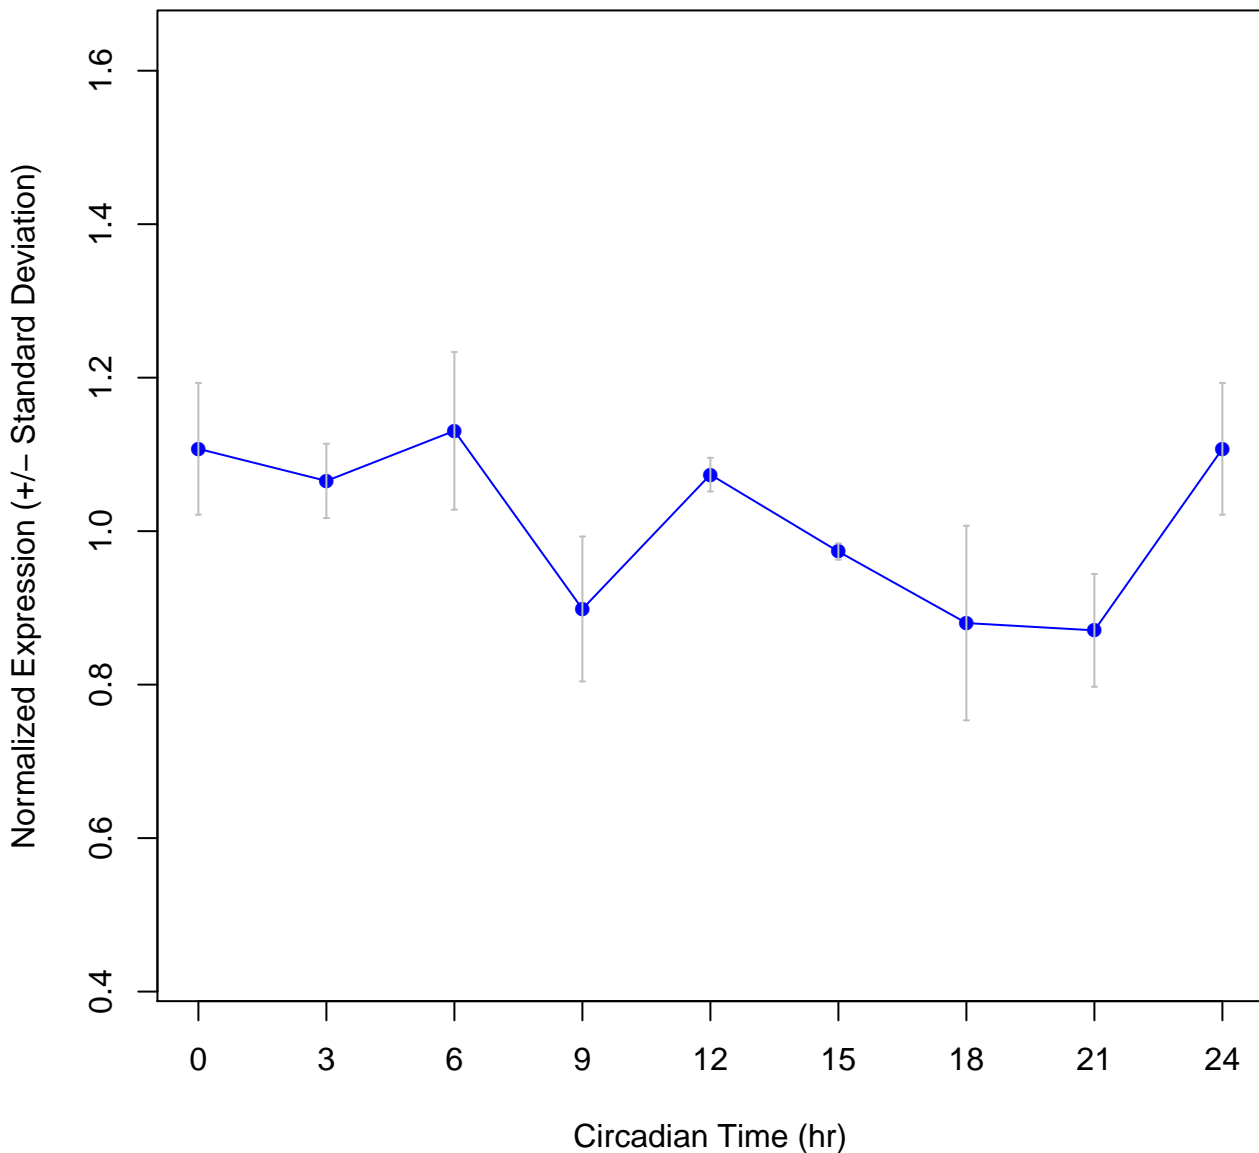

Supplement Figure 4 tyr

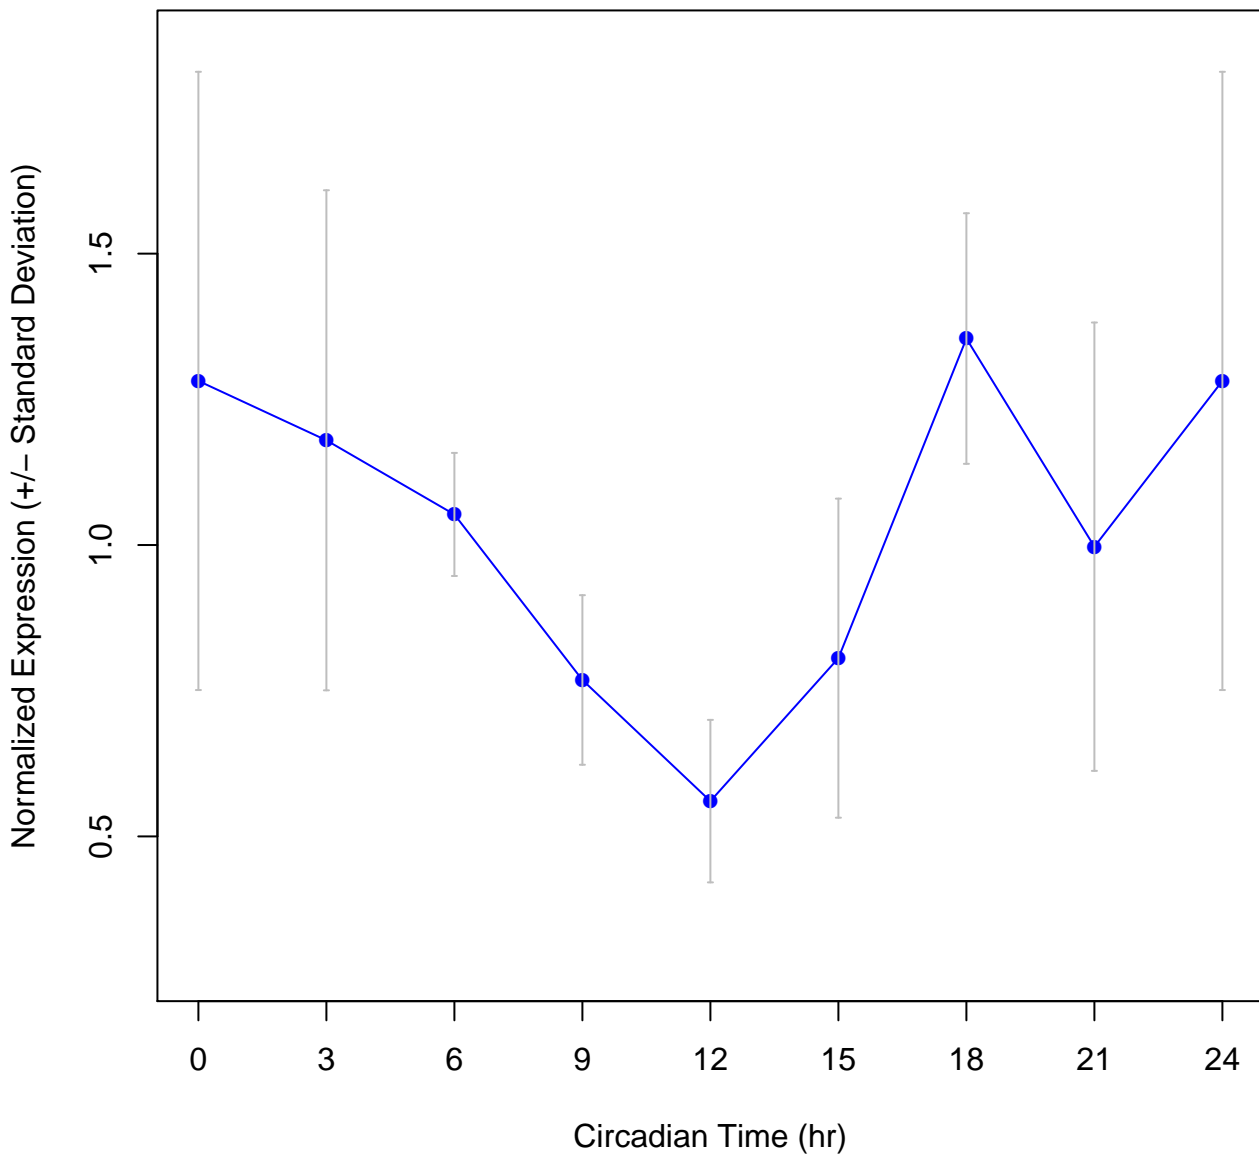

Supplement Figure 4 tyrp1

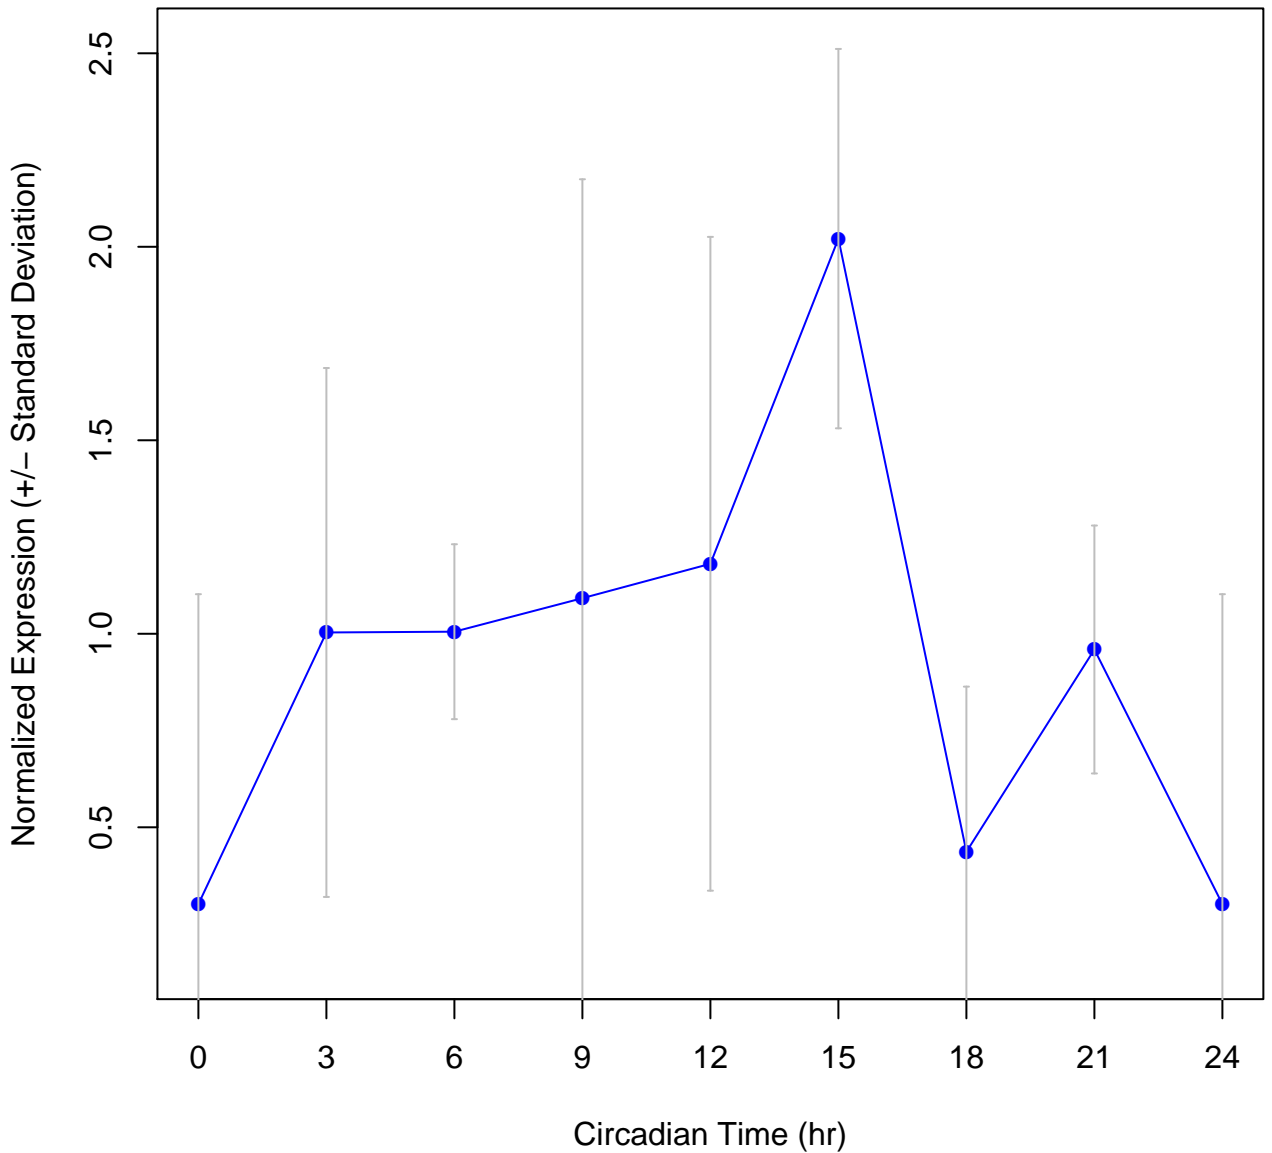

Supplement Figure 4 *vipr1*

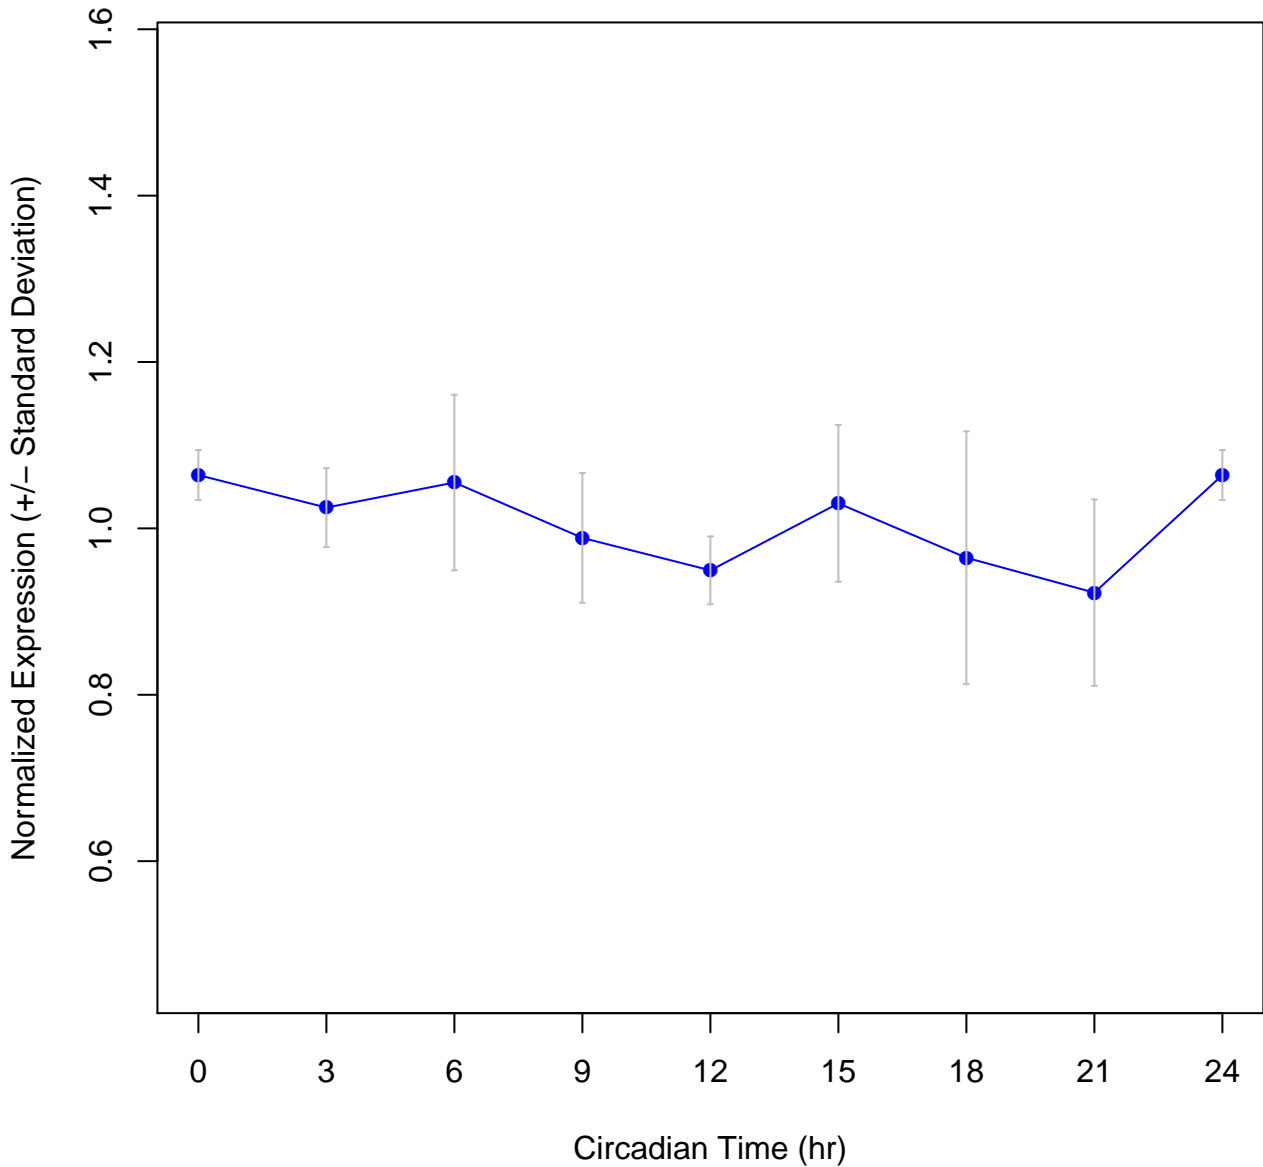

Supplement Figure 4 wdr37

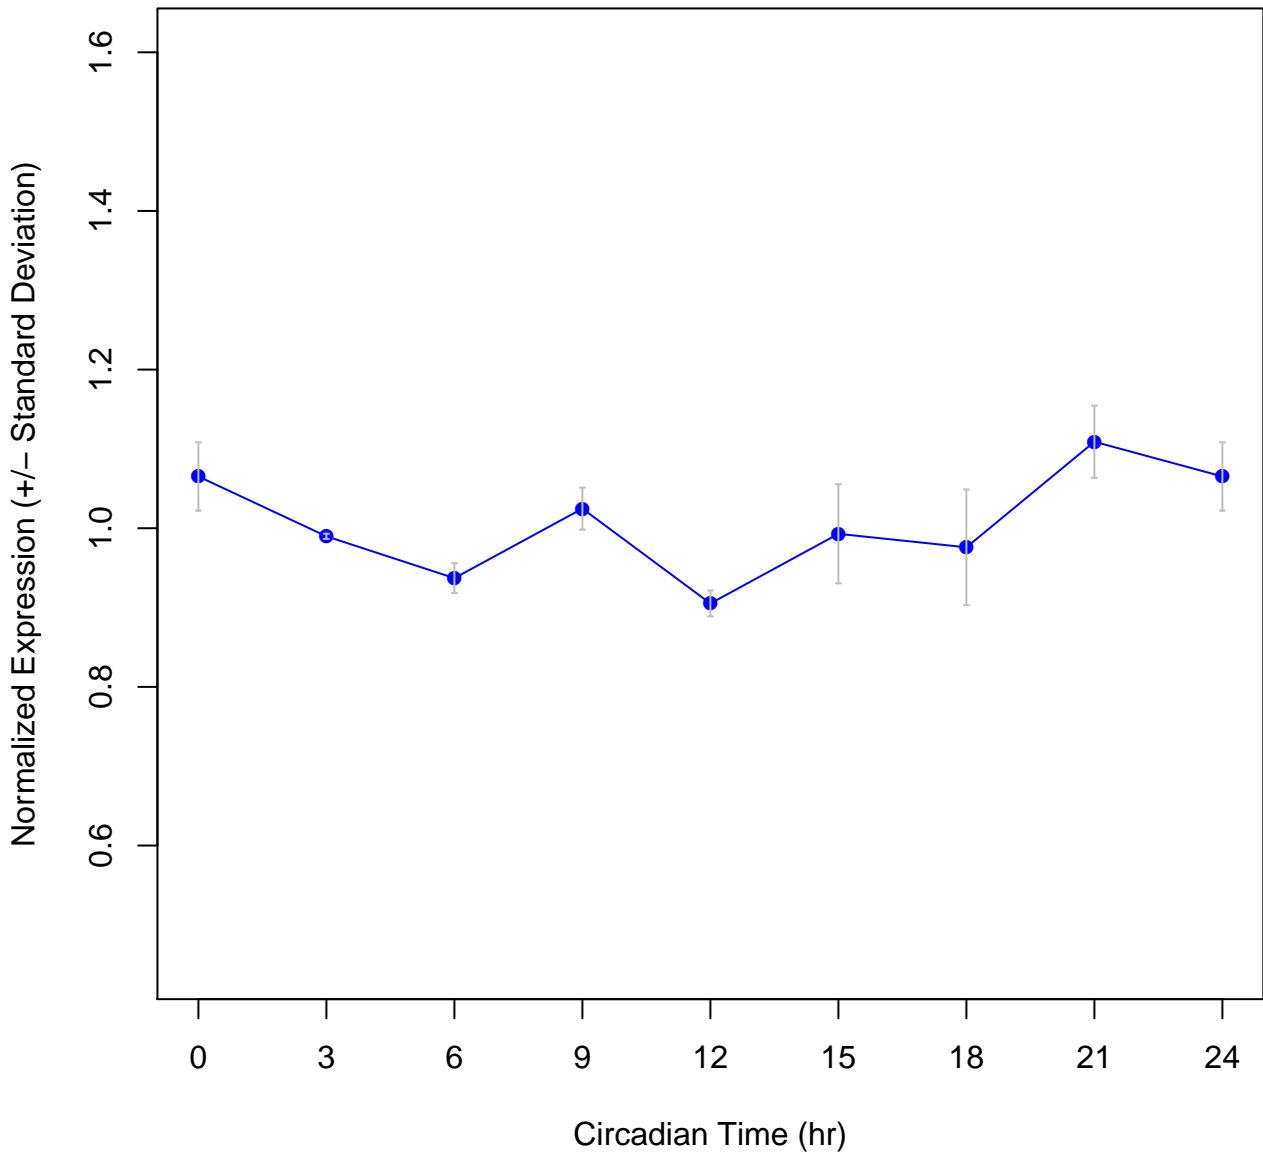



Supplement Figure 4 wdr76

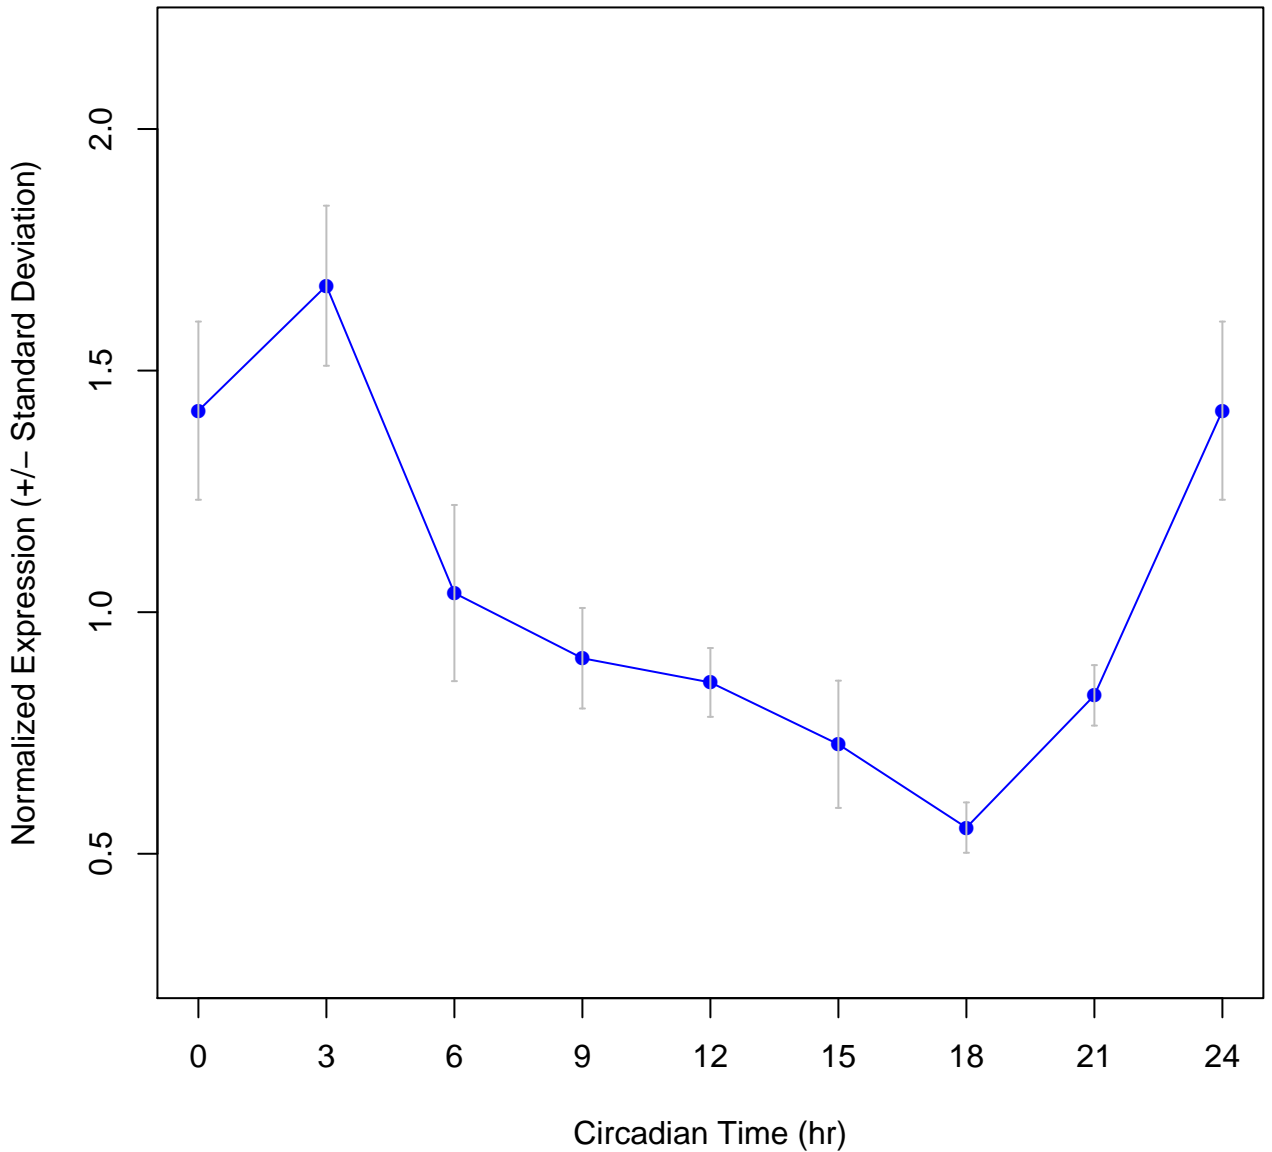

Supplement Figure 4 *wnt10b*

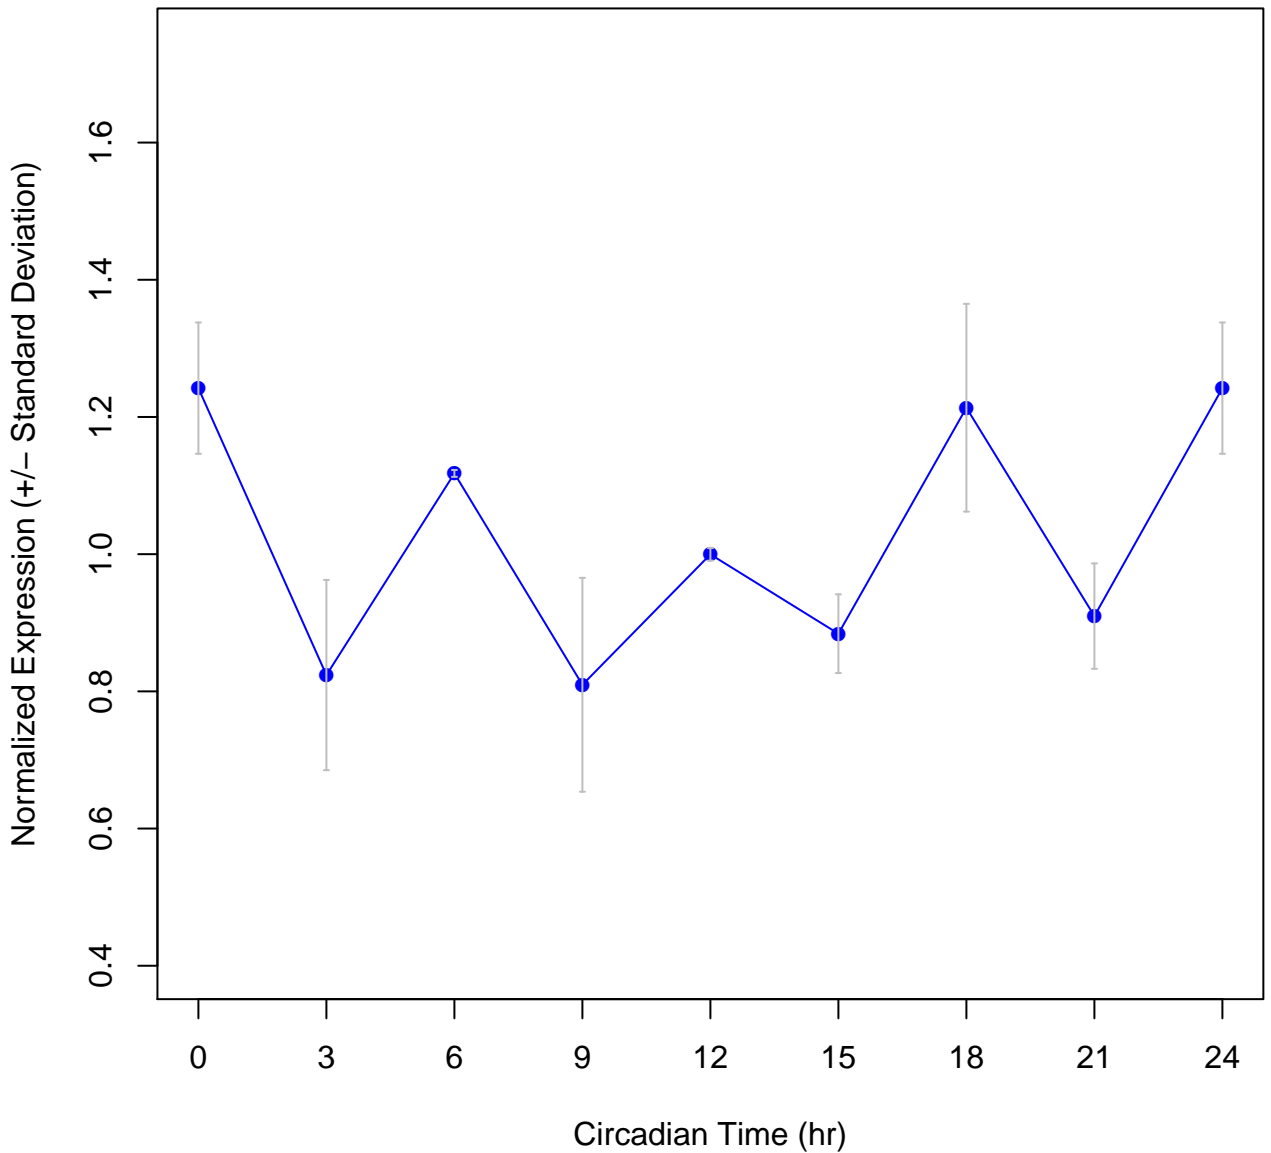

Supplement Figure 4 wnt2b

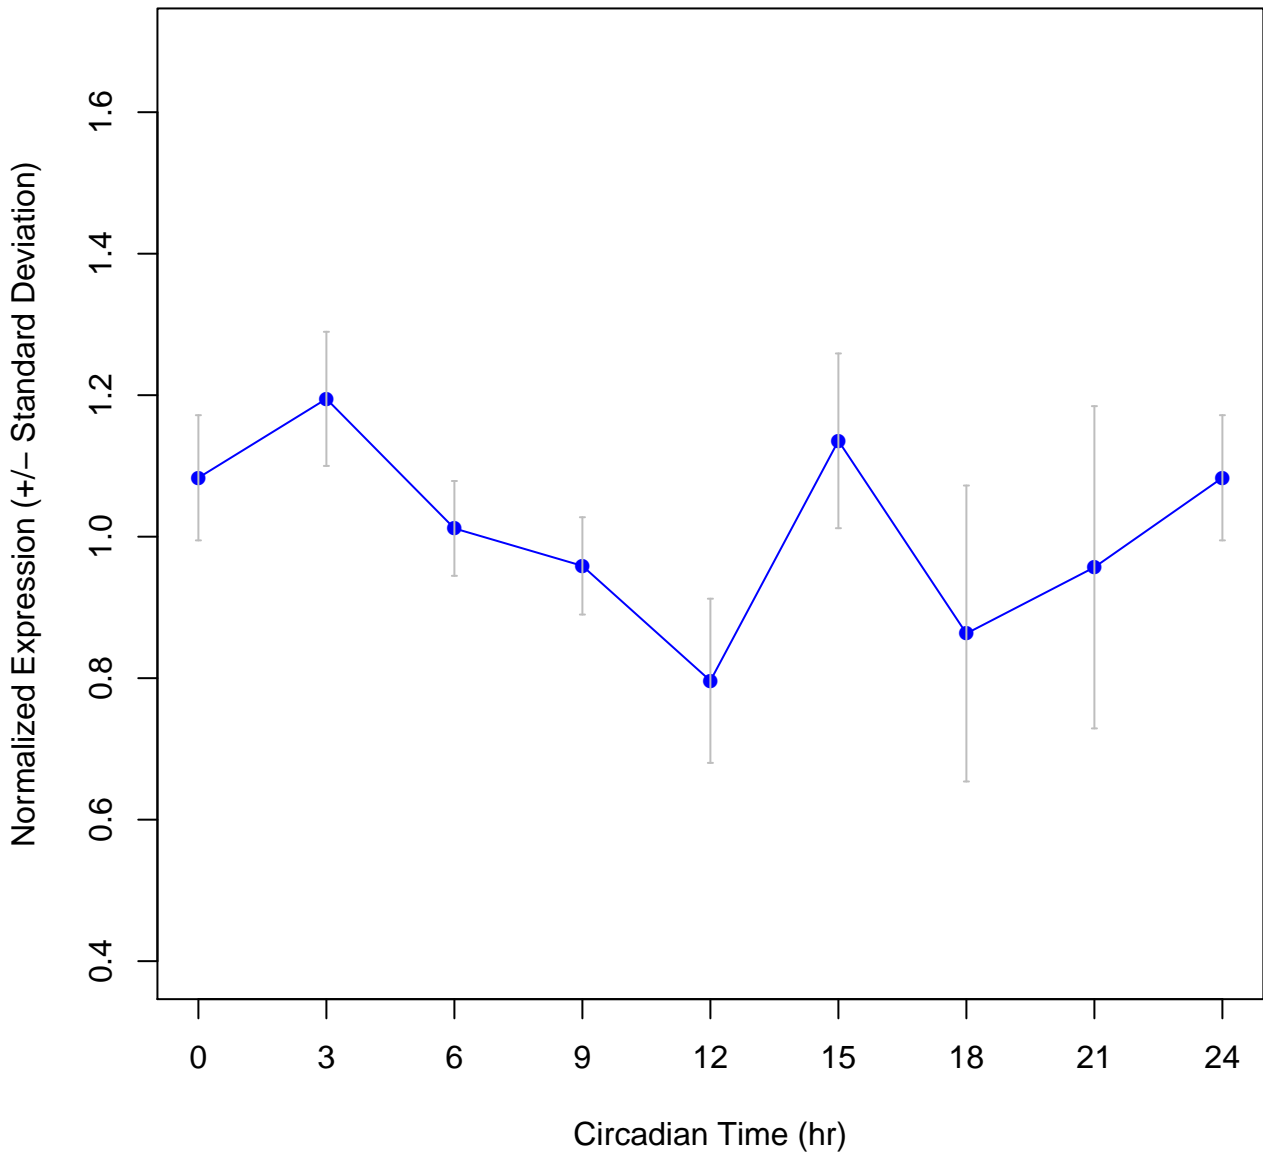

Supplement Figure 4 *wnt5a*

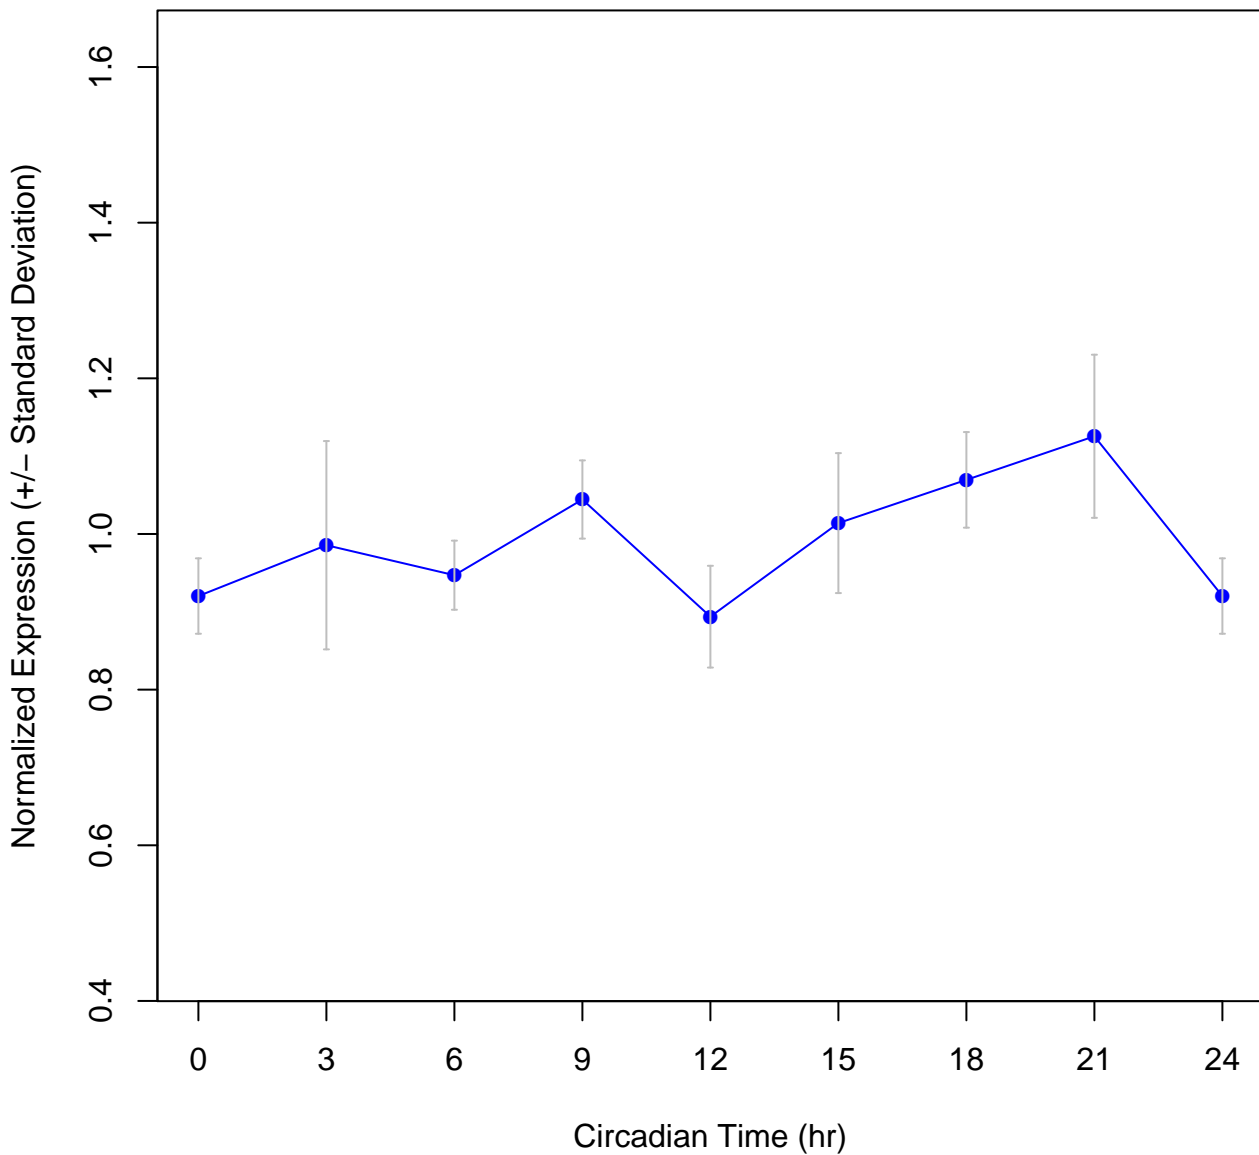

Supplement Figure 4 wt1

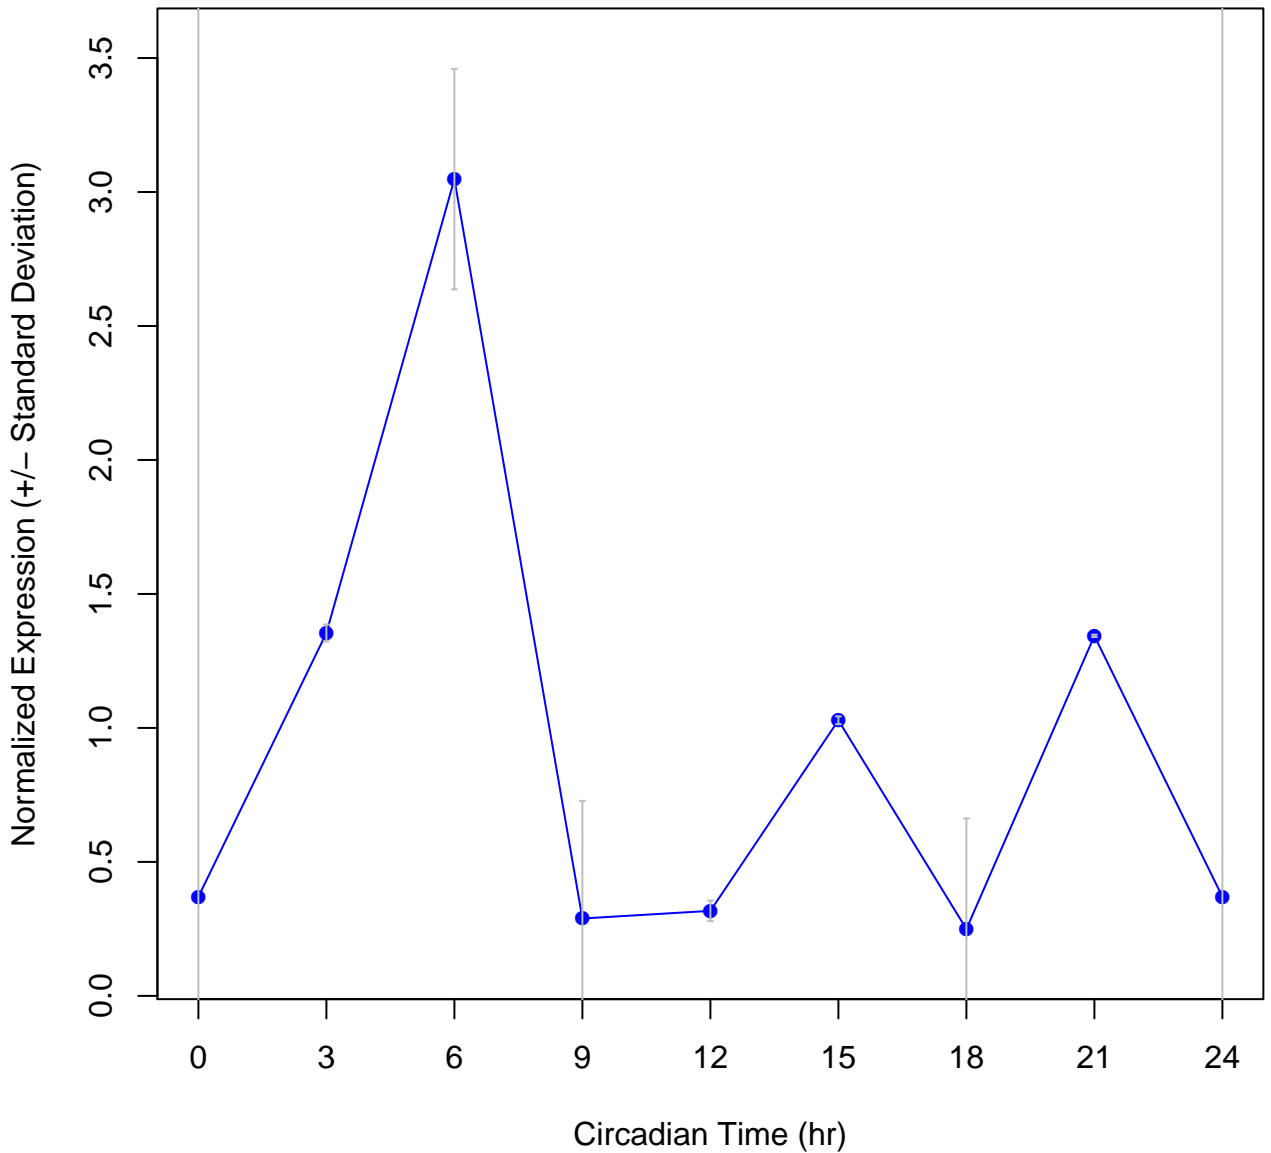

Supplement Figure 4 xpc

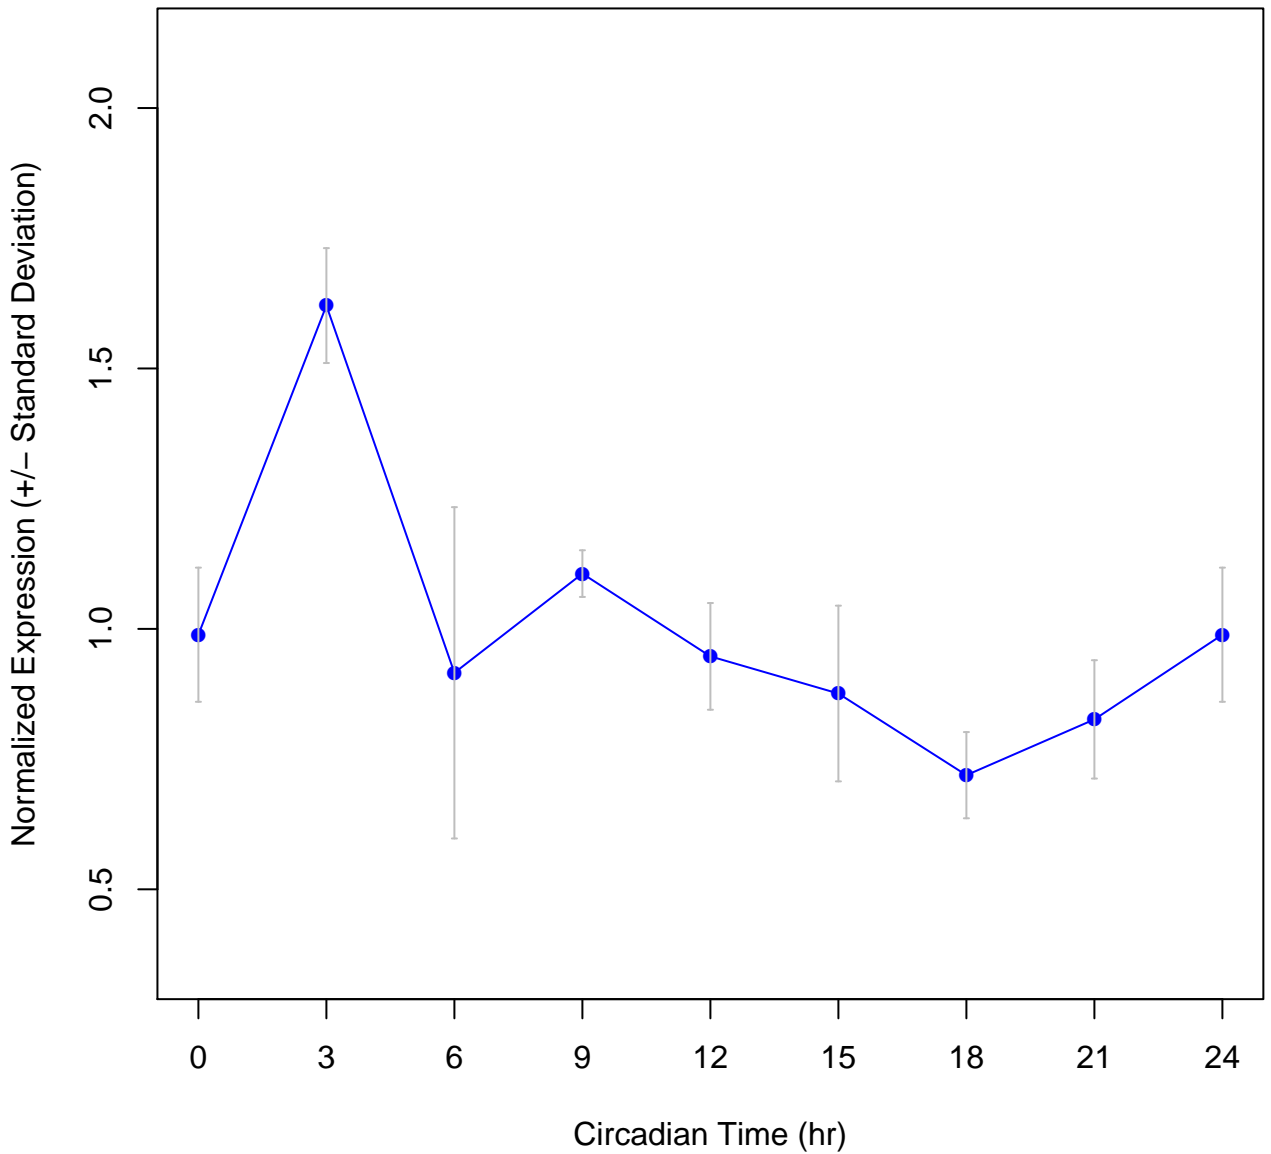

## Supplement Figure 4 xrcc1

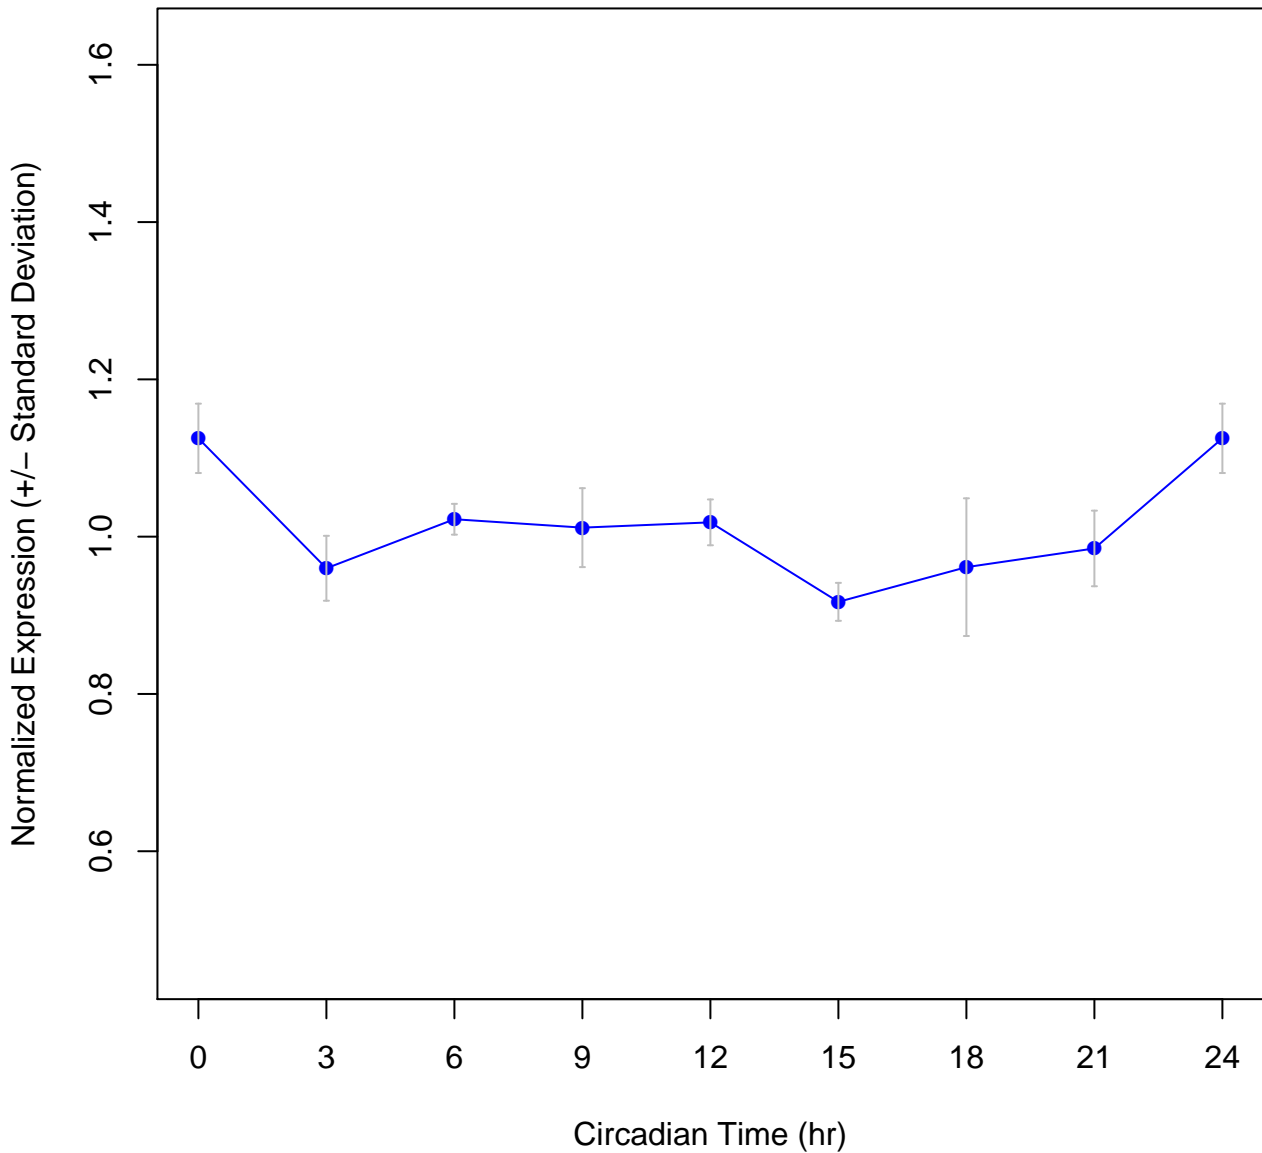

**Supplement Figure 4 ybx2**

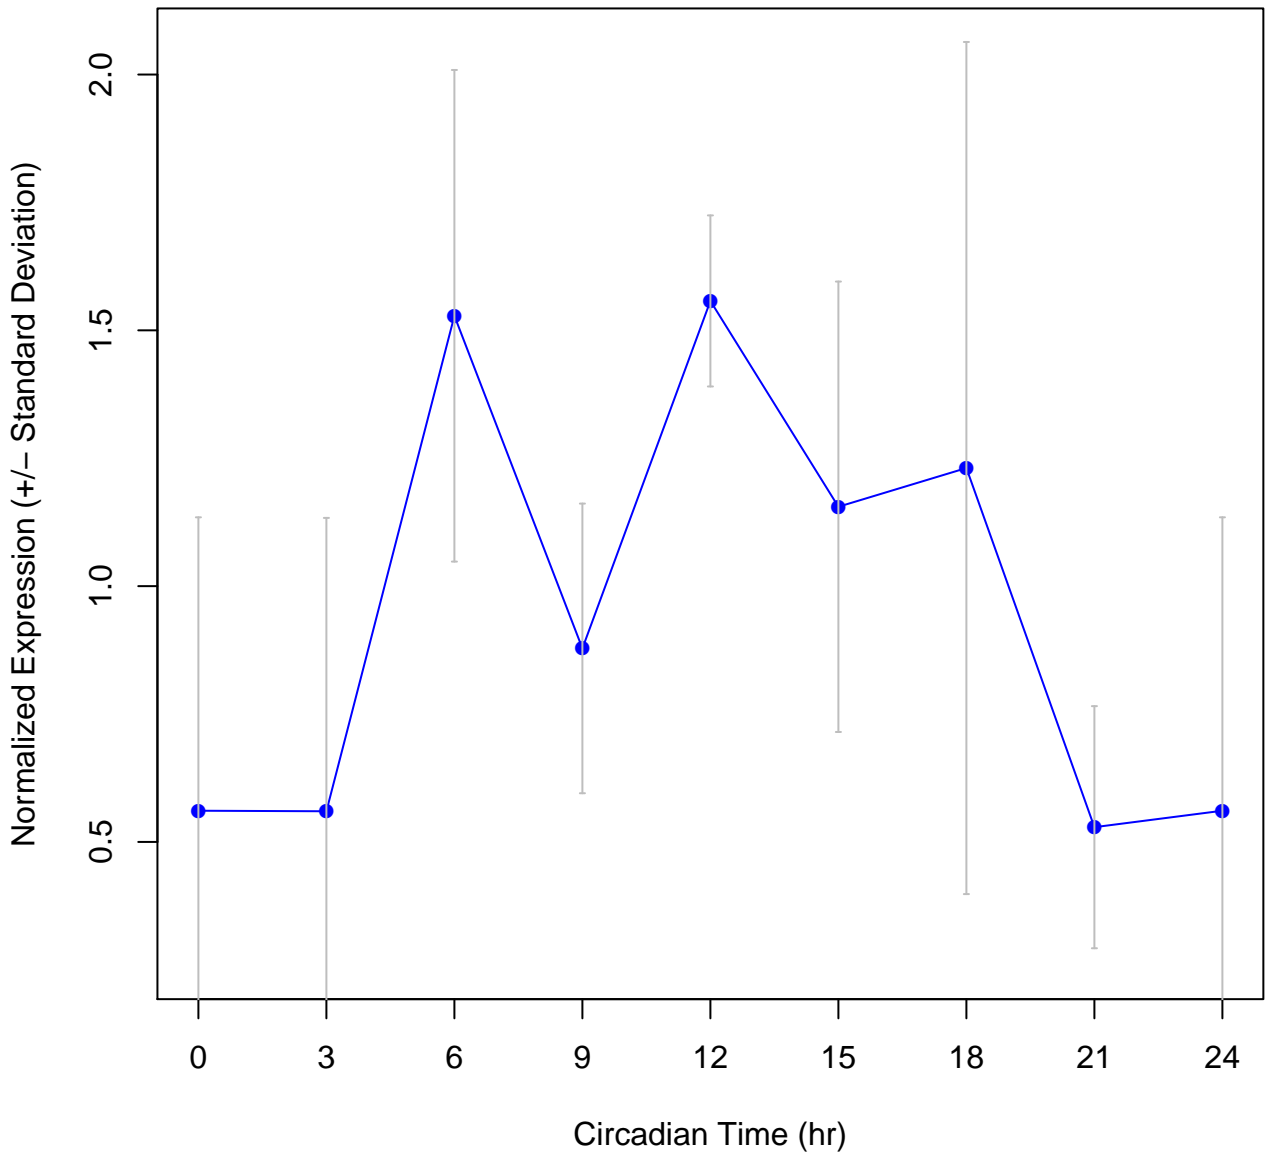



## Supplement Figure 4 yme1

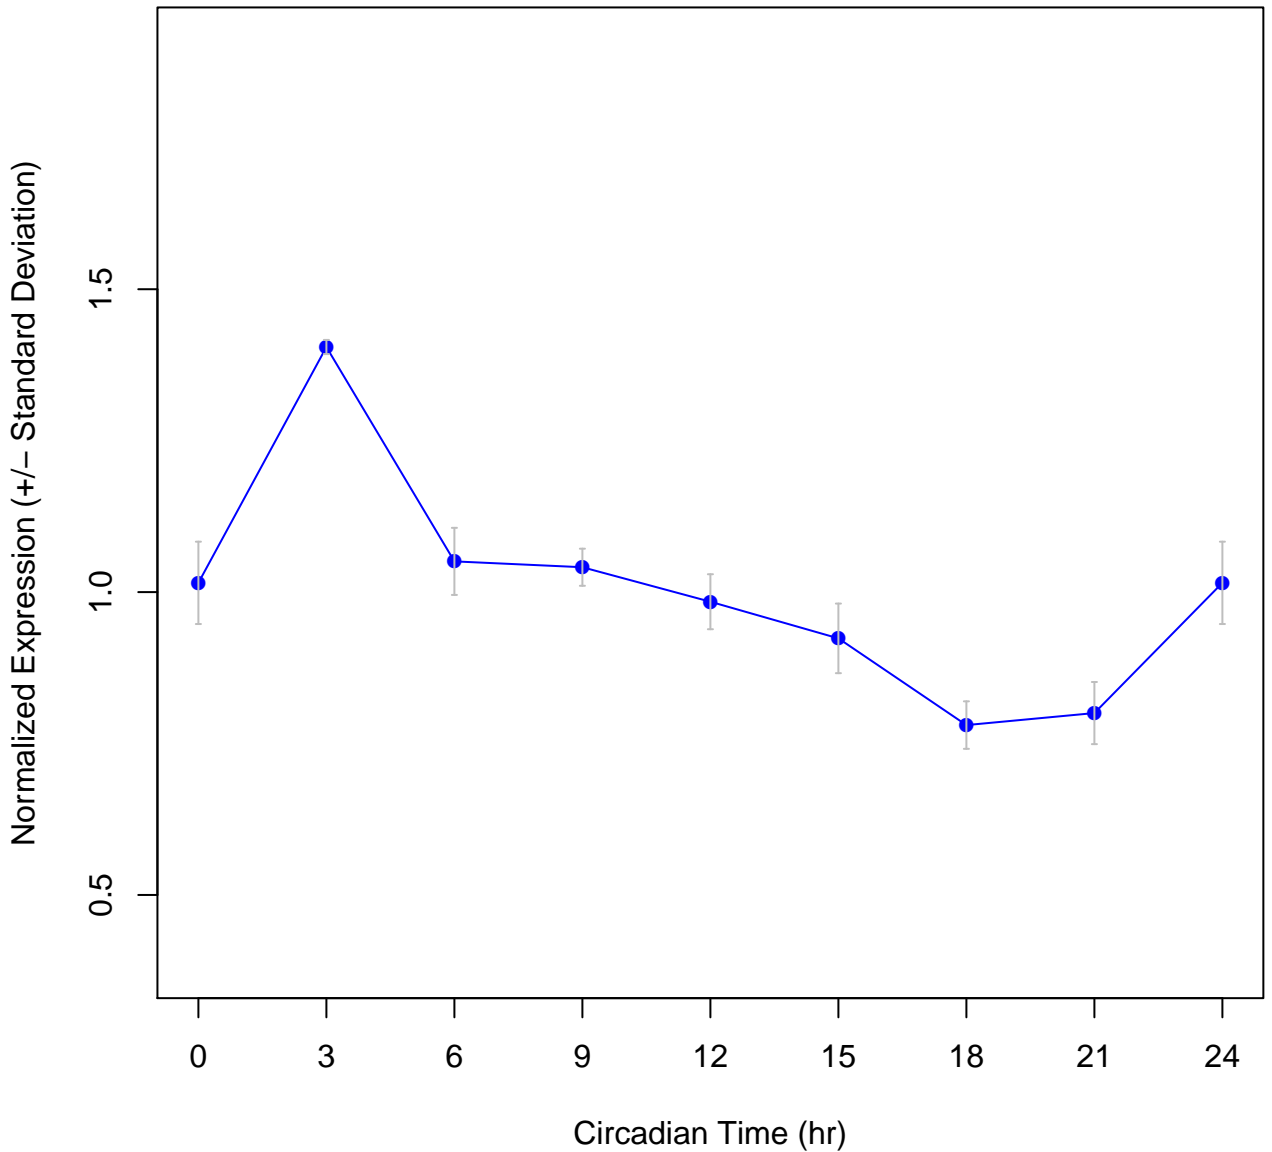

## Supplement Figure 4 ywhaQ

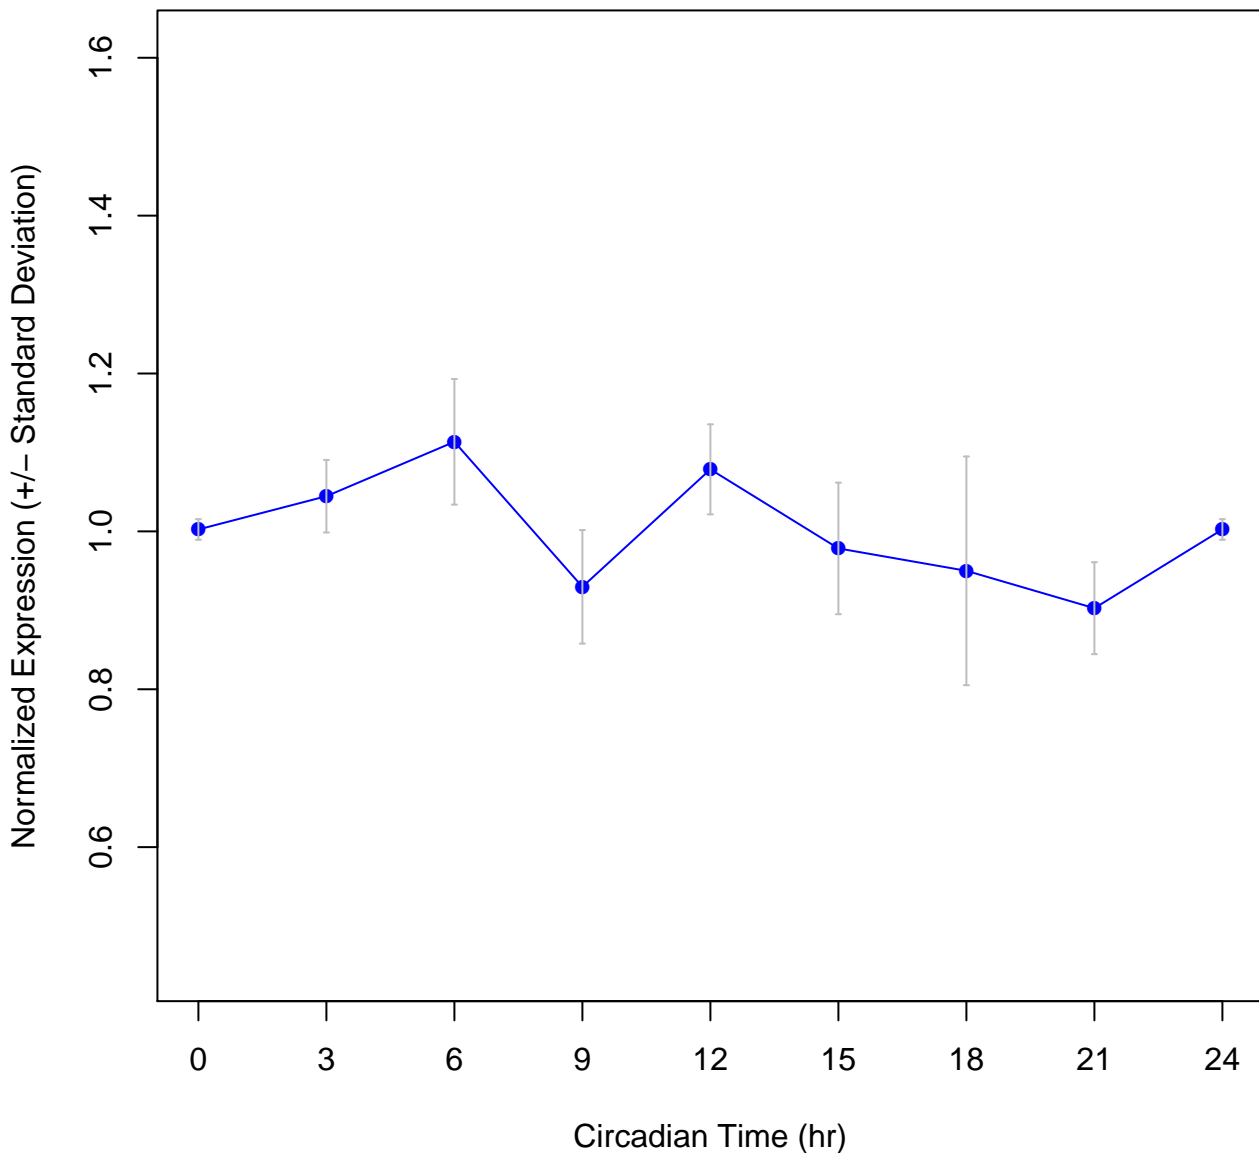

## Supplement Figure 5 6-4 photolyase

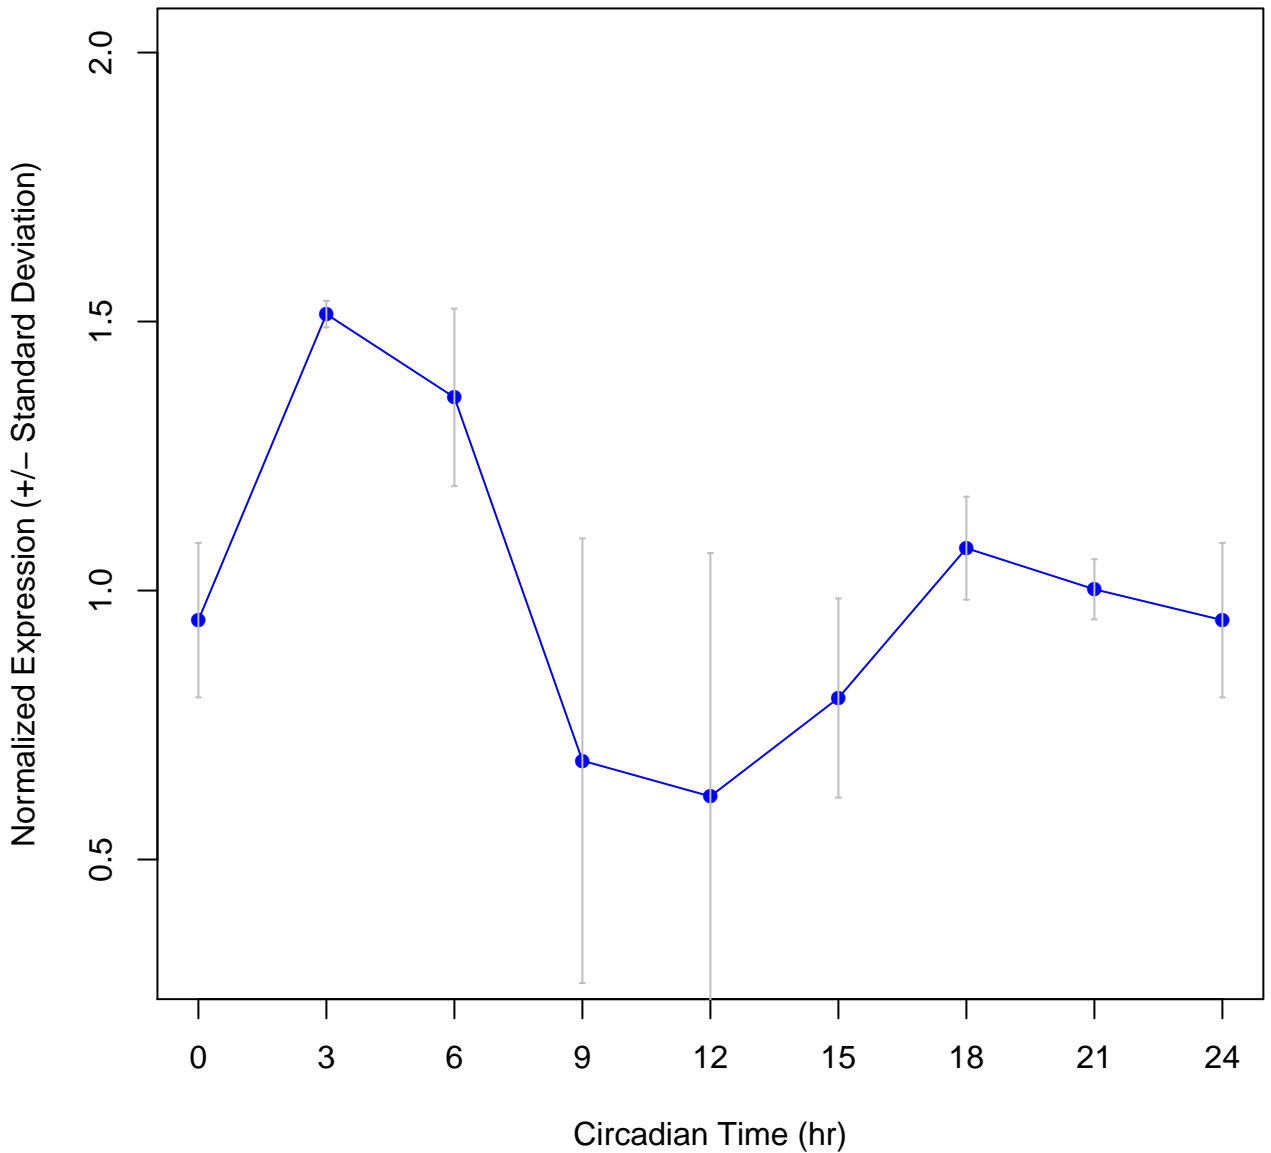

Supplement Figure 5 a2ml1

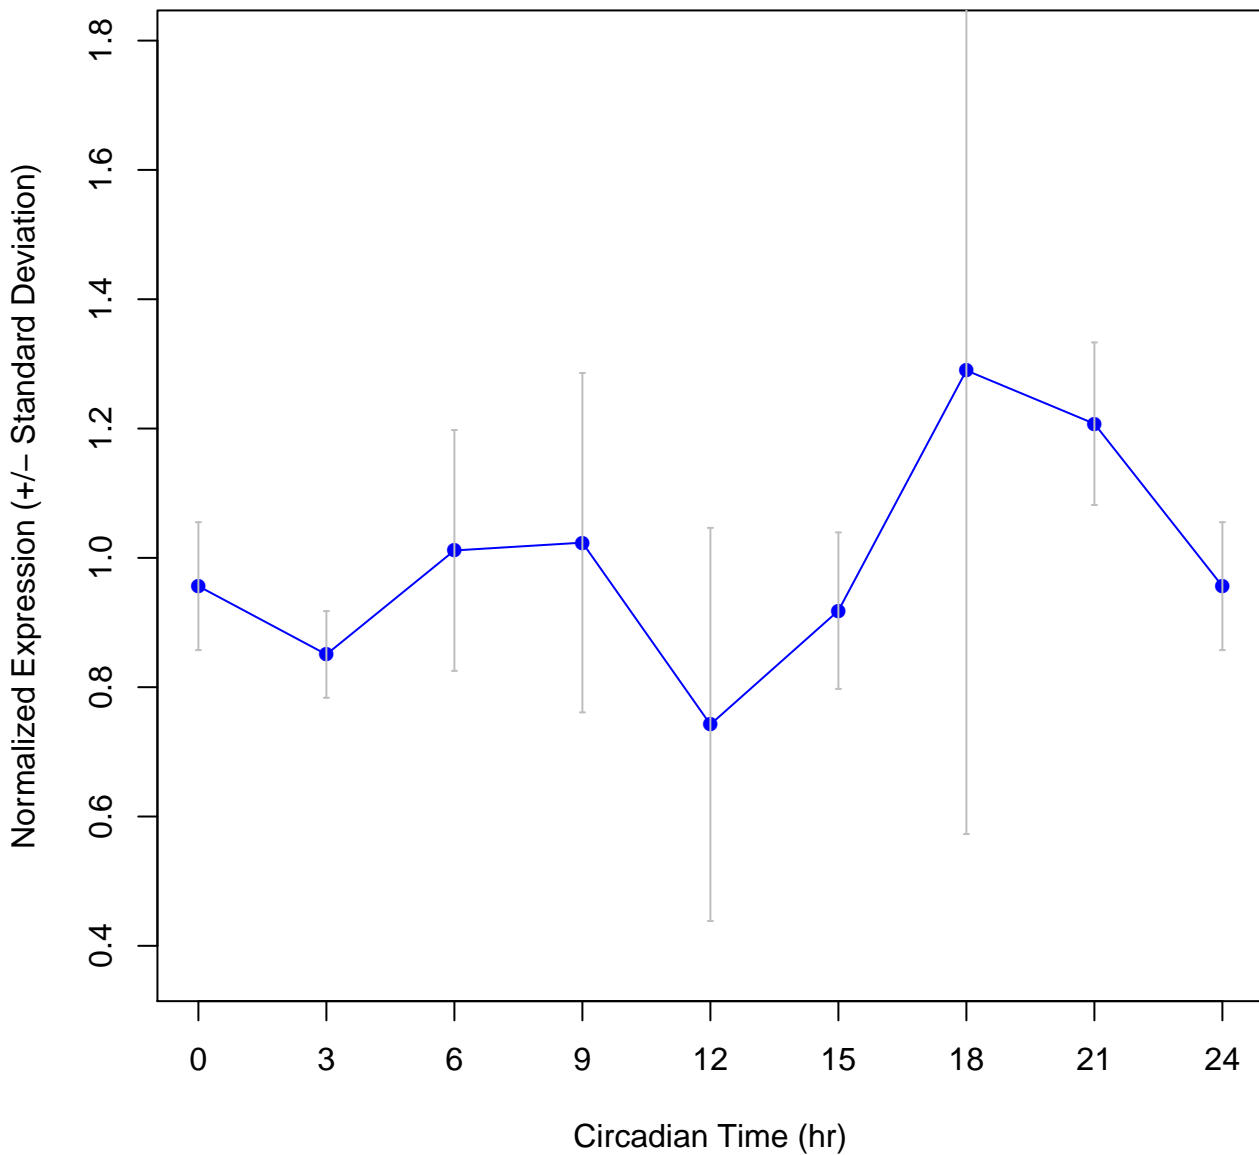

**Supplement Figure 5 adamts2**

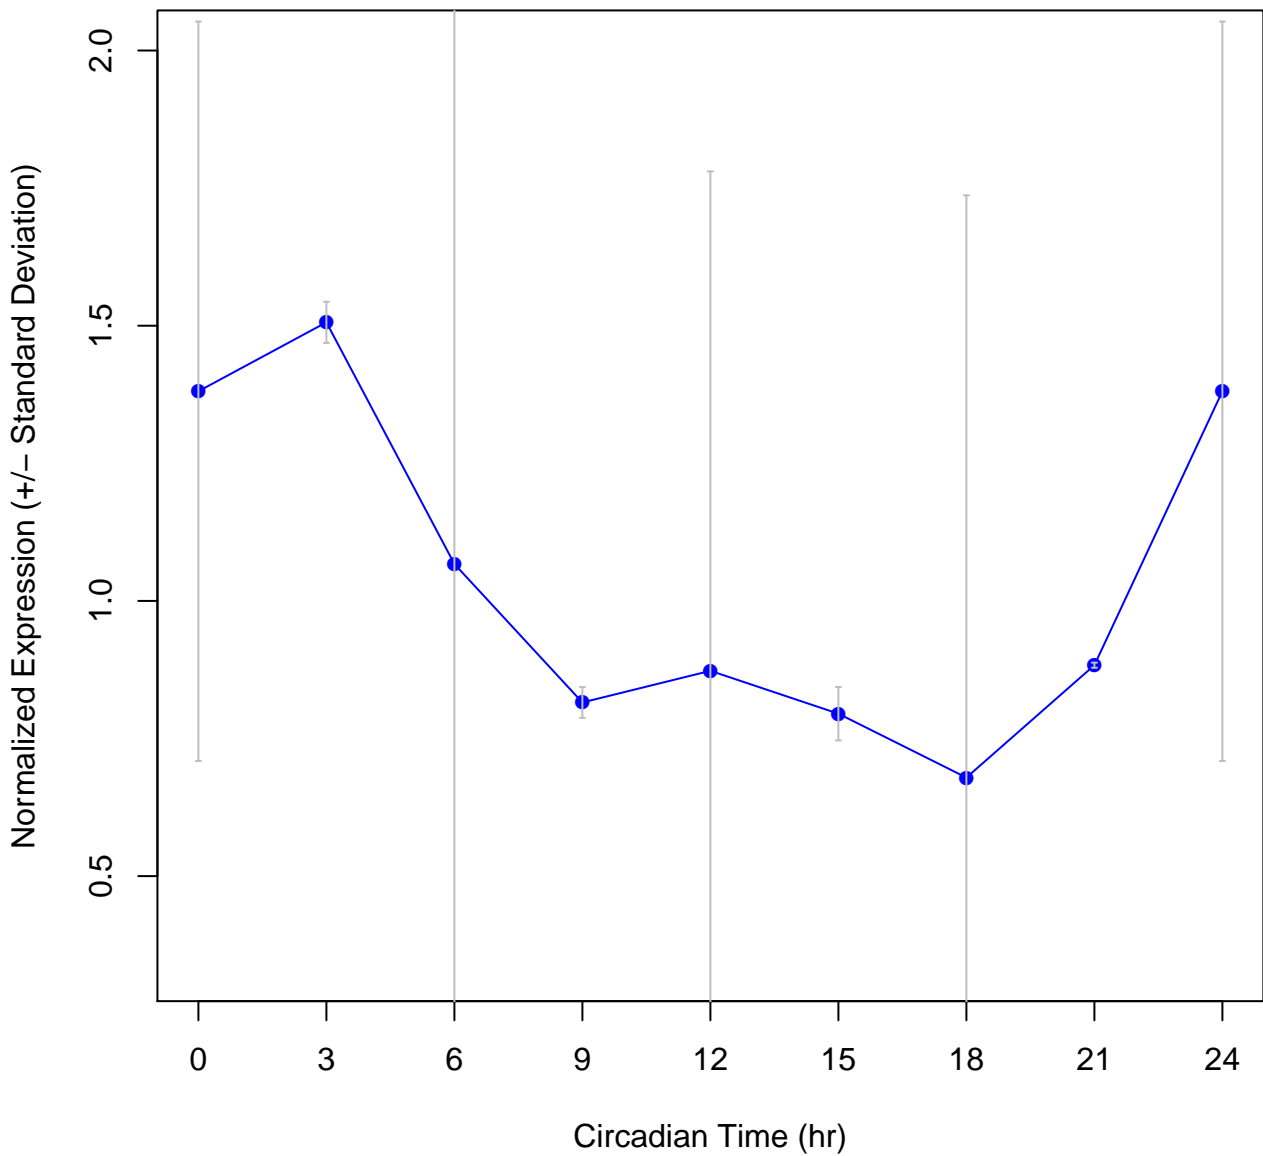

Supplement Figure 5 adcy2

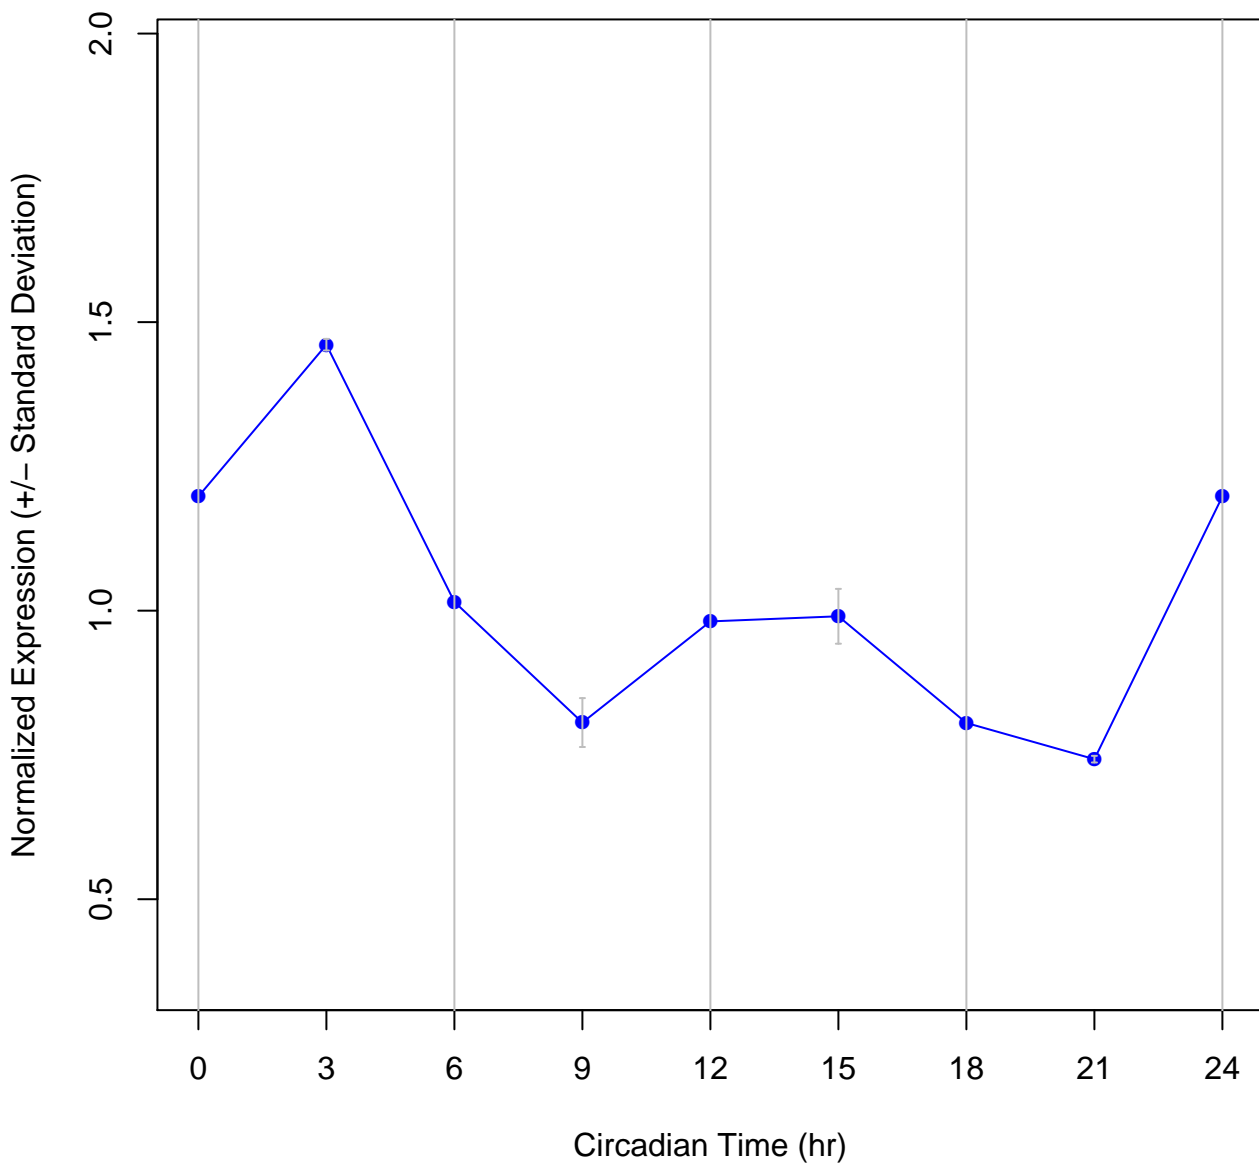

Supplement Figure 5 adrb2

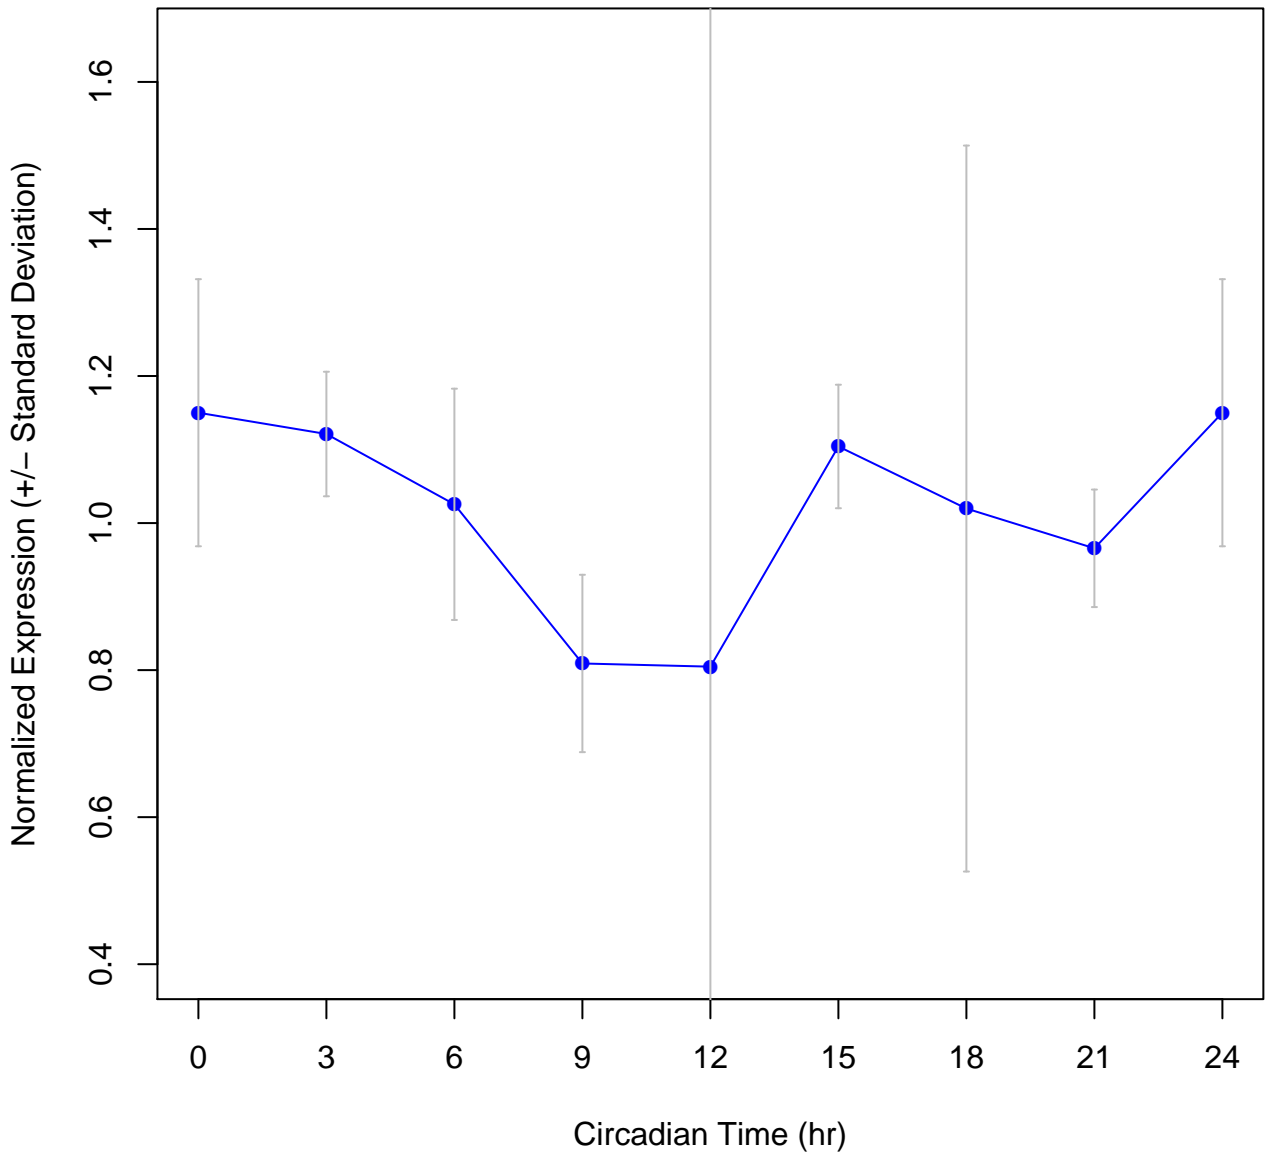

Supplement Figure 5 akt1

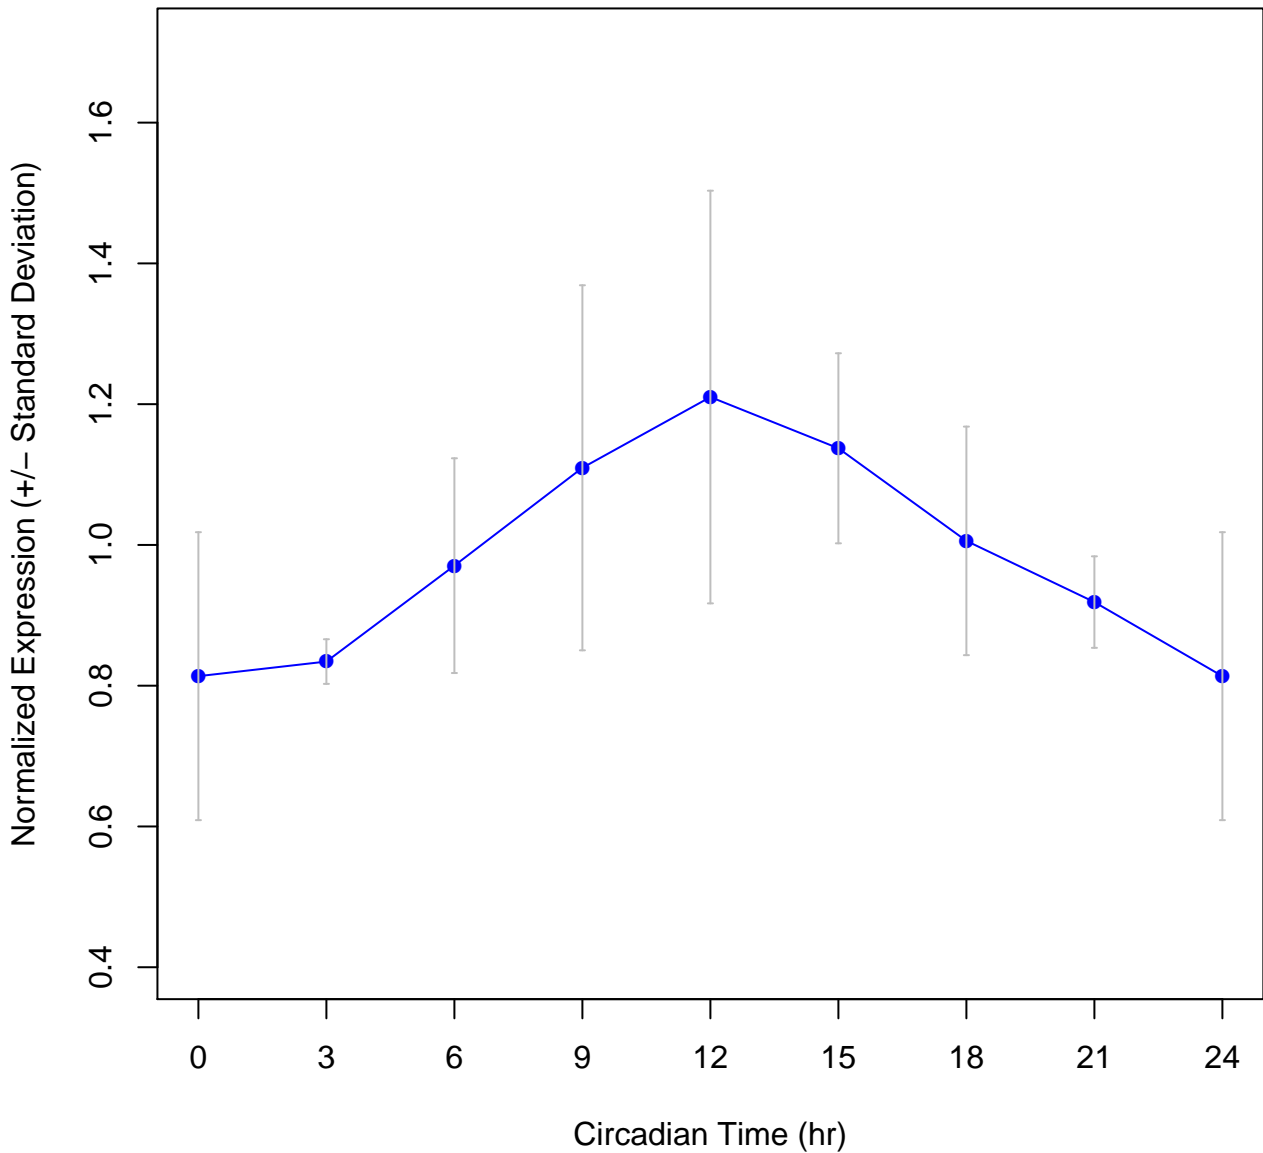



Supplement Figure 5 akt2

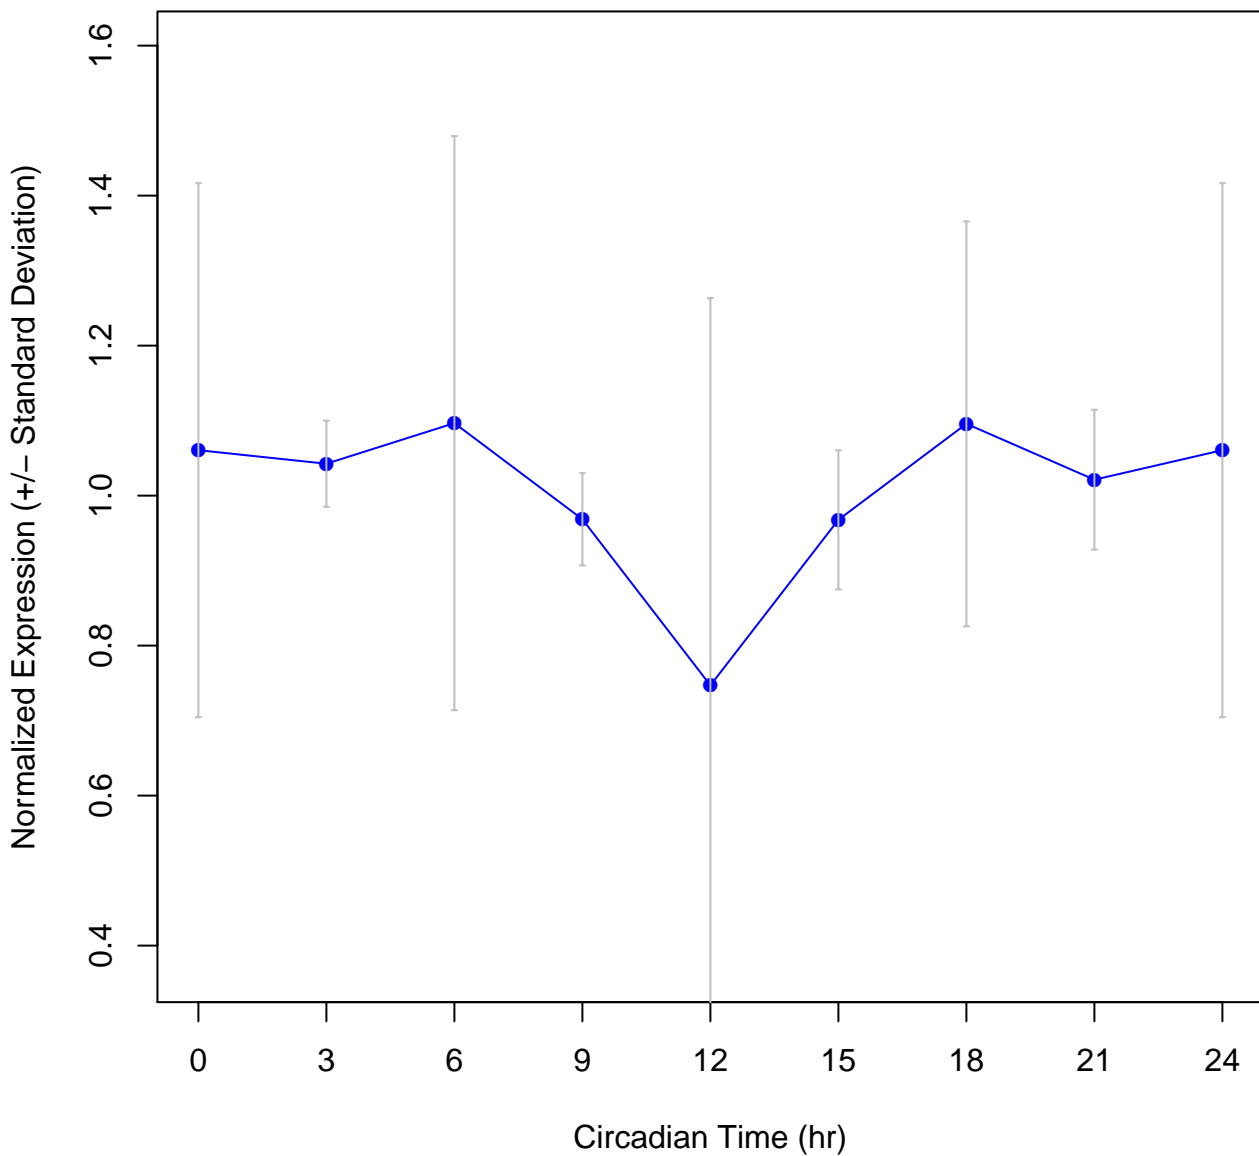

**Supplement Figure 5 akt3**

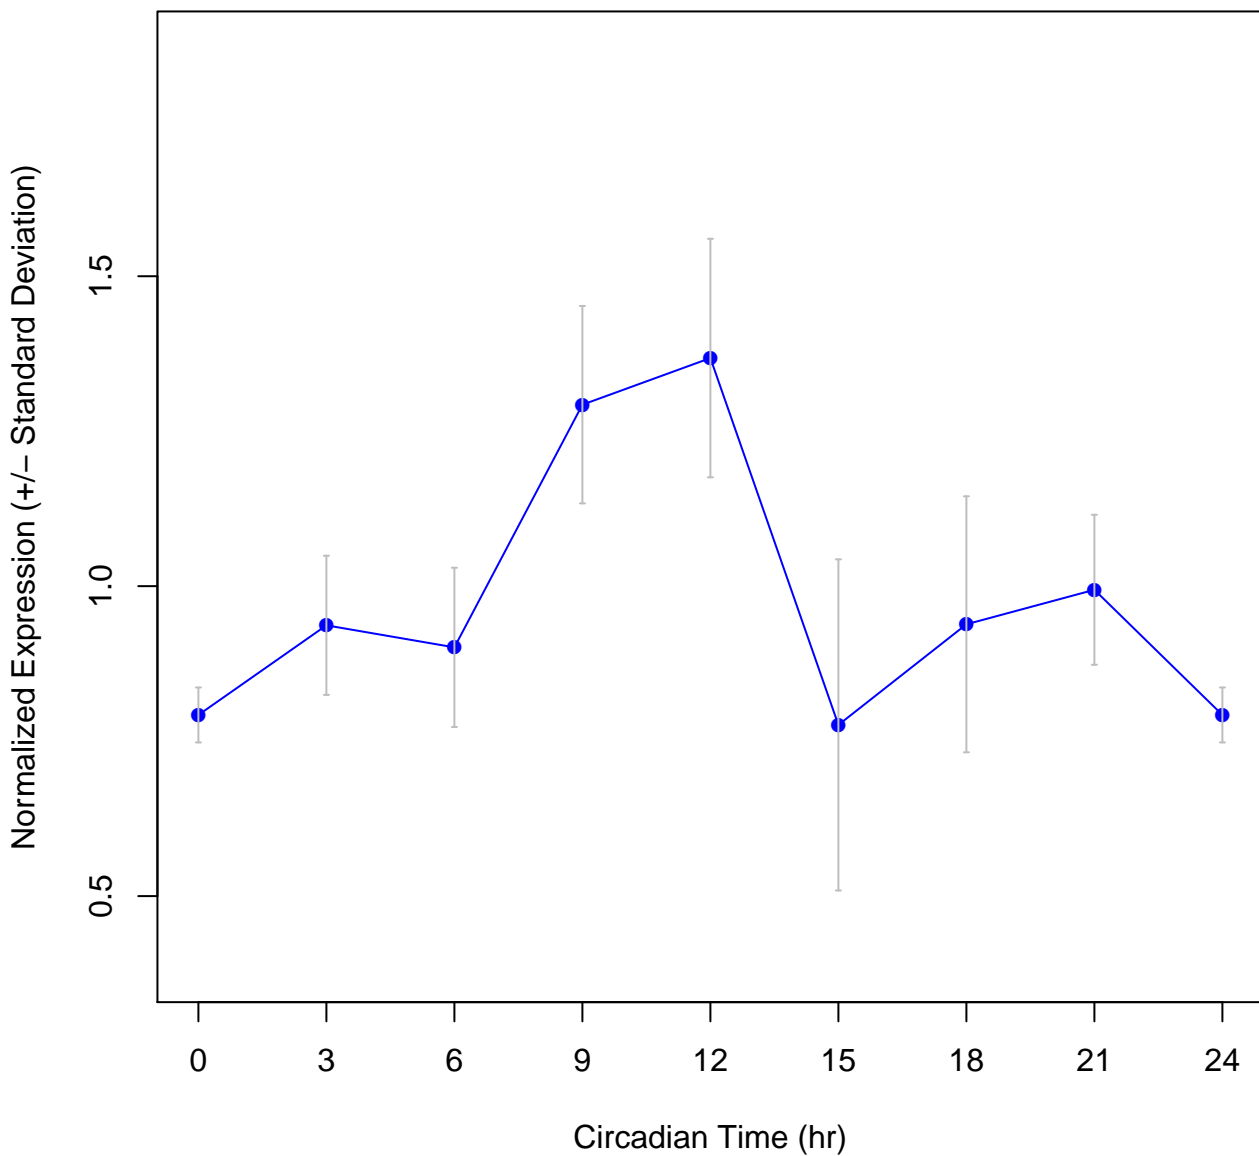

Supplement Figure 5 apex2

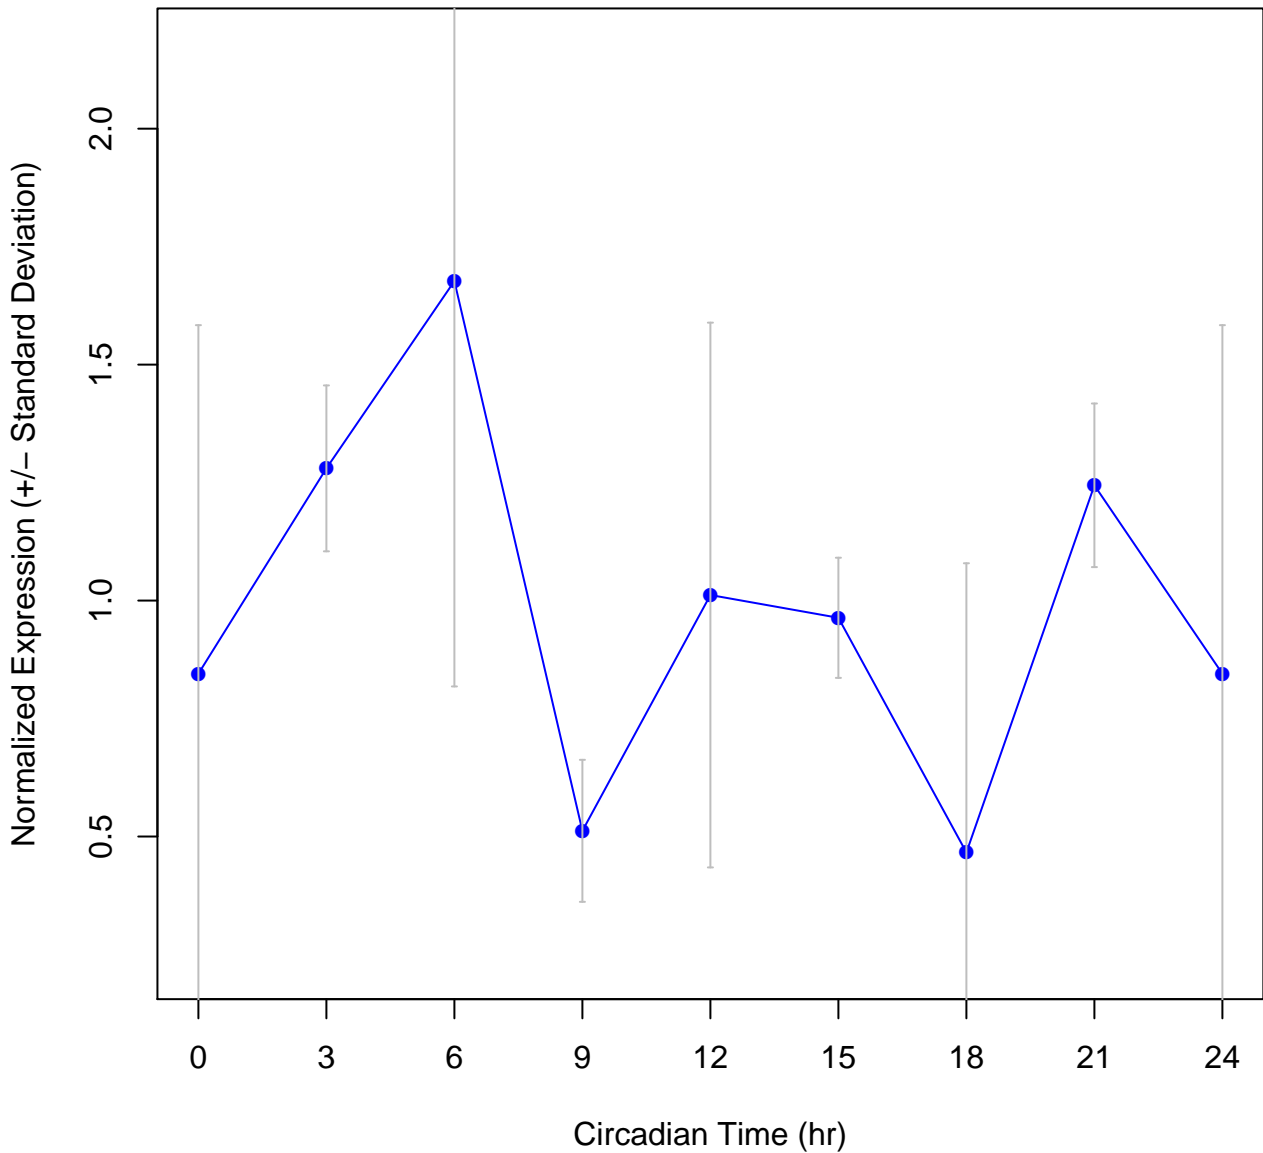

Supplement Figure 5 arhgap19

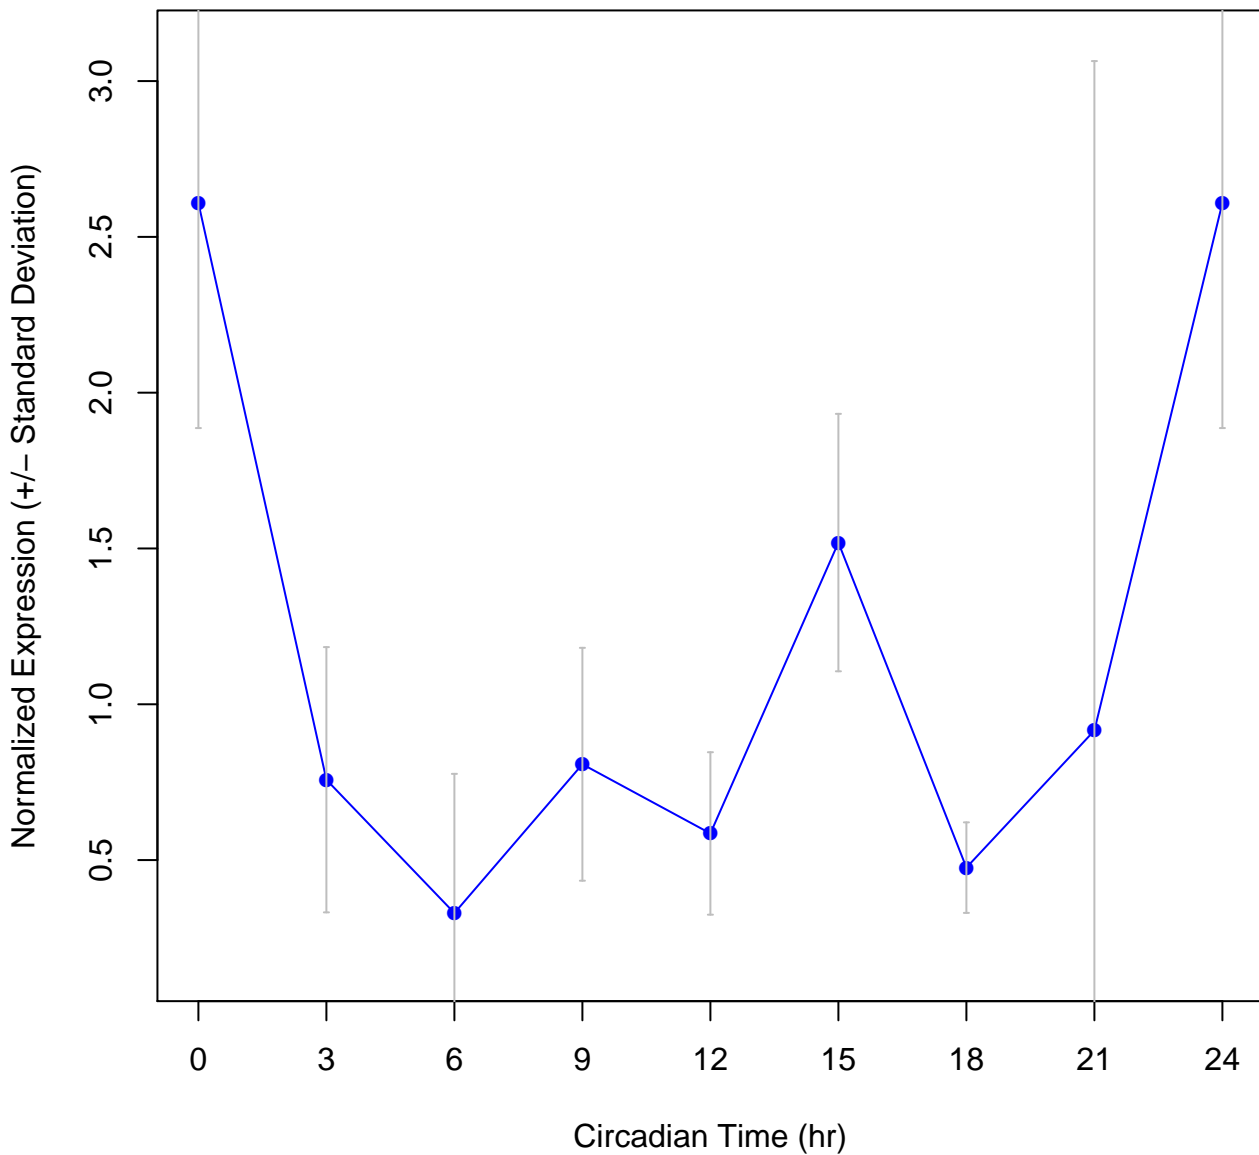

Supplement Figure 5 arid1a

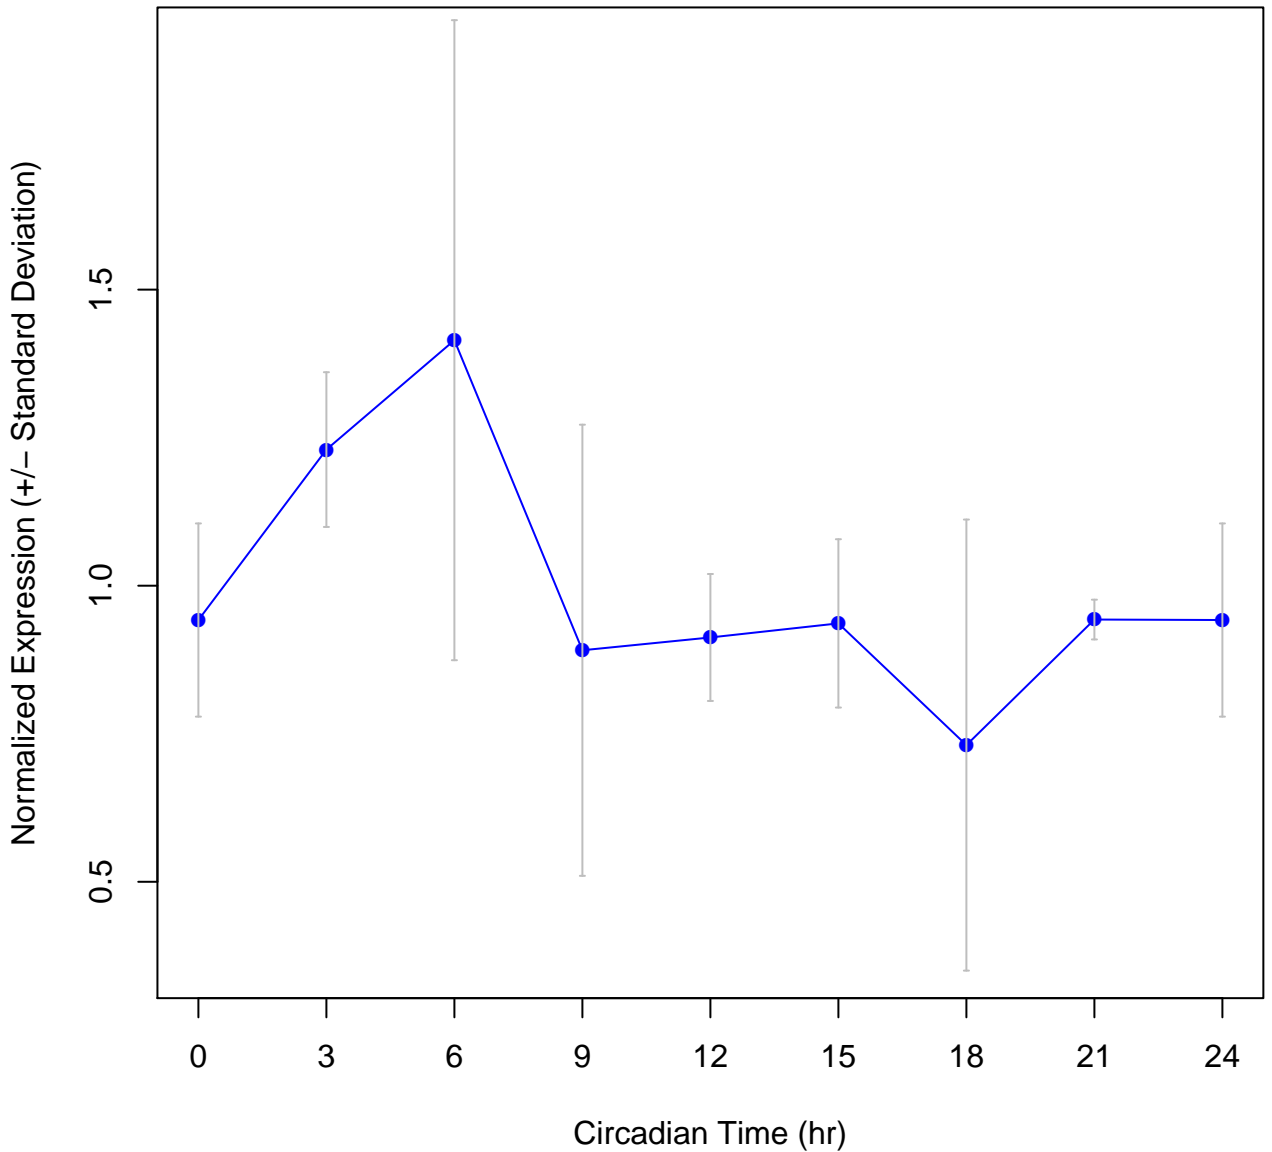

Supplement Figure 5 ash2l

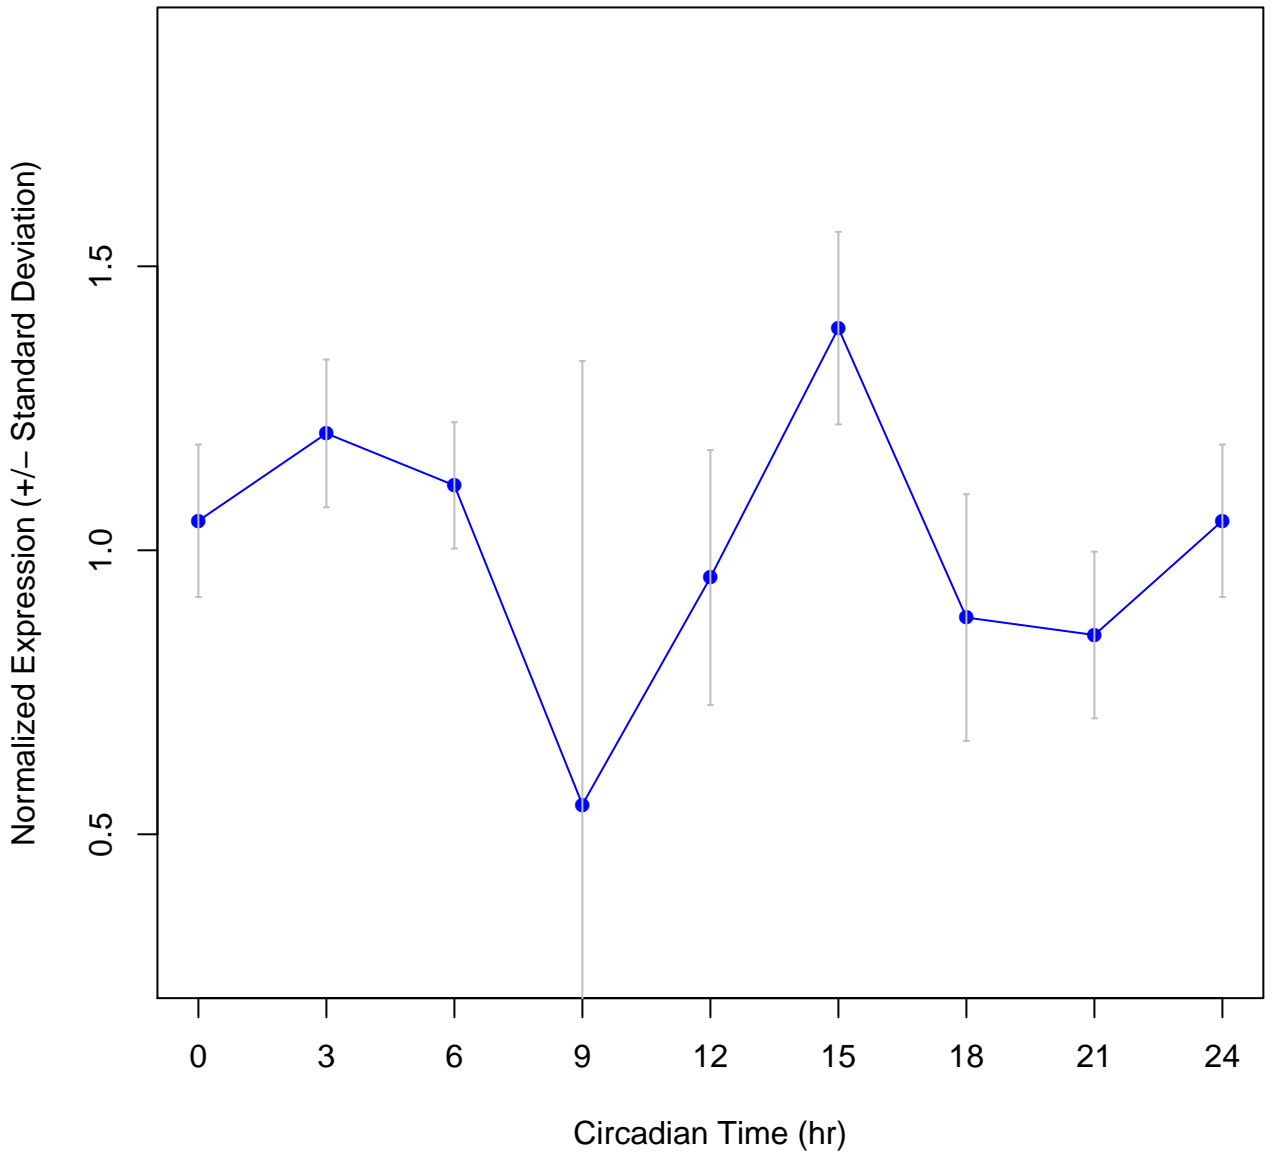

**Supplement Figure 5 asic1**

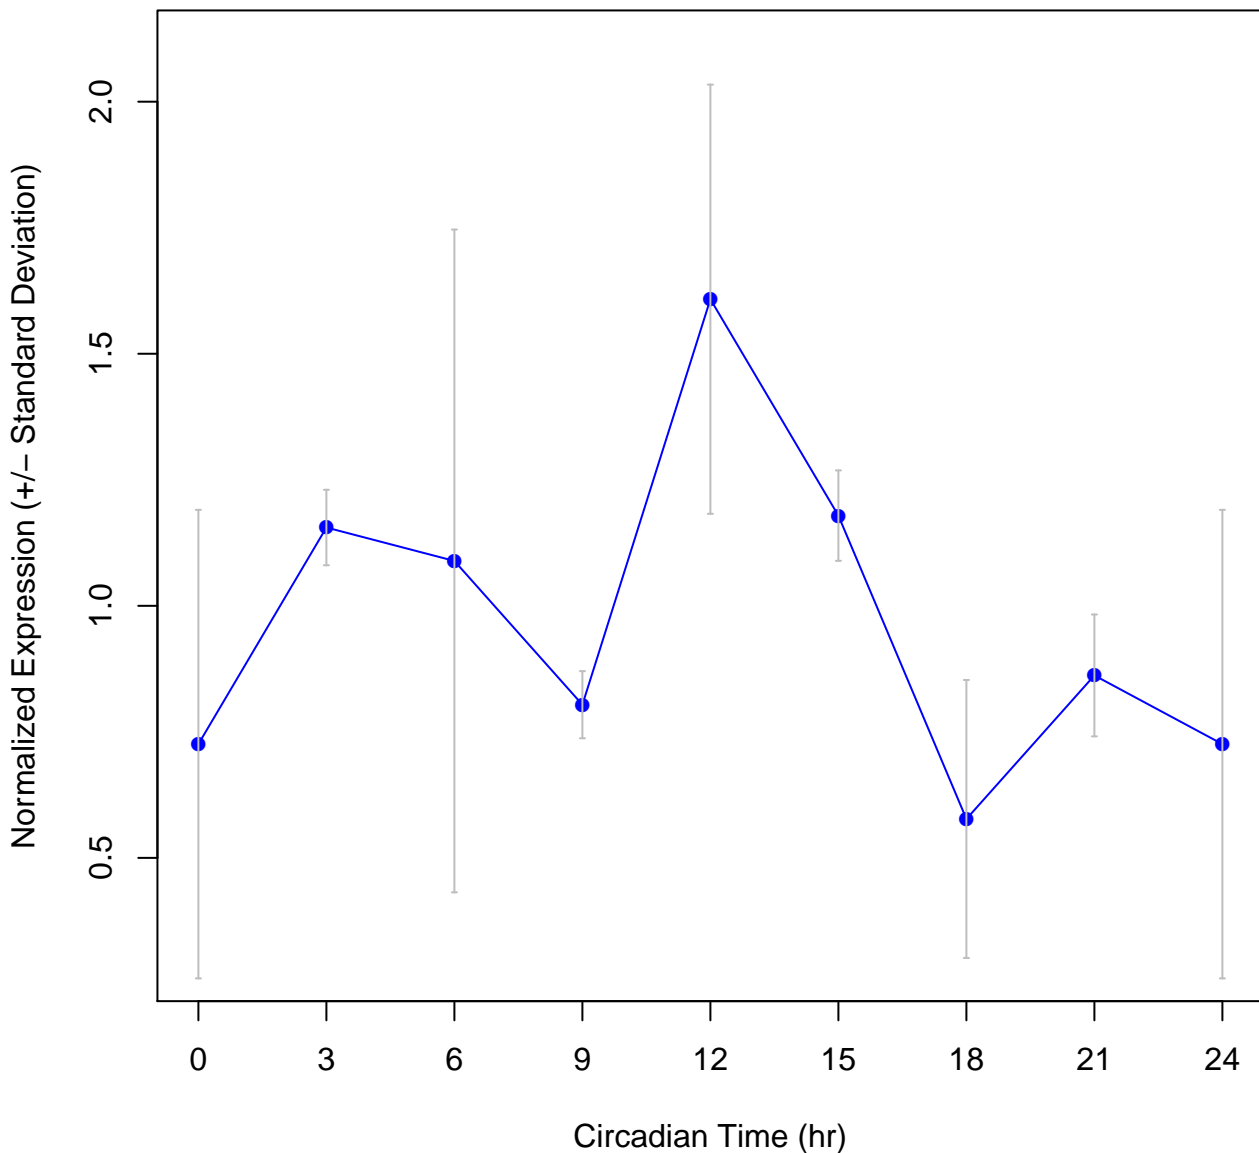

Supplement Figure 5 atm

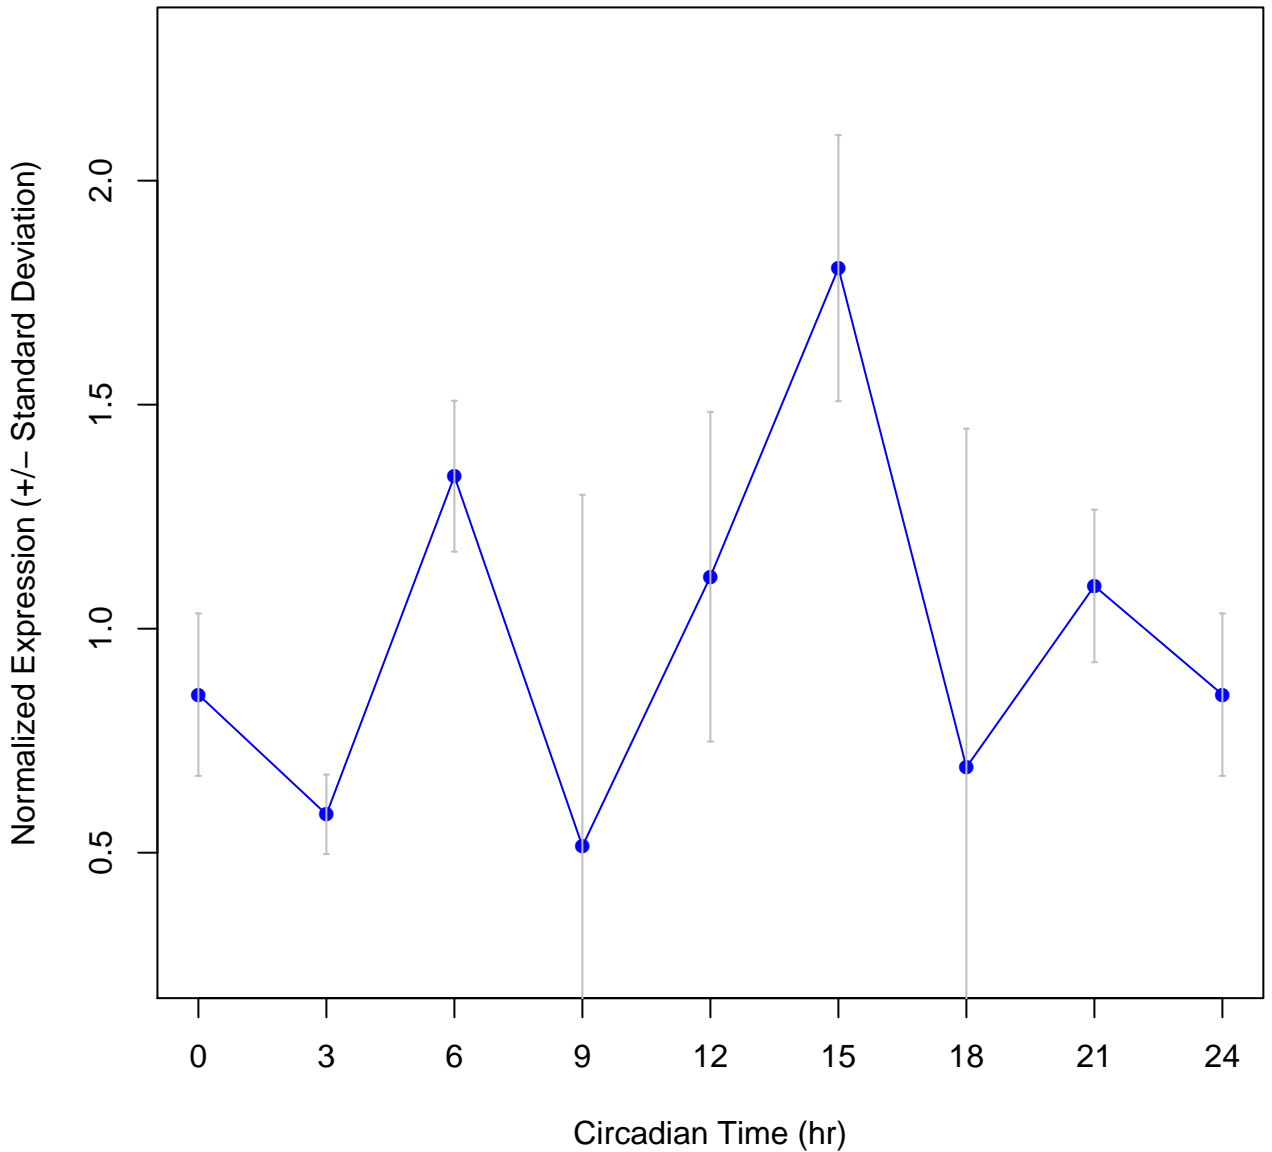



Supplement Figure 5 *atp2a1*

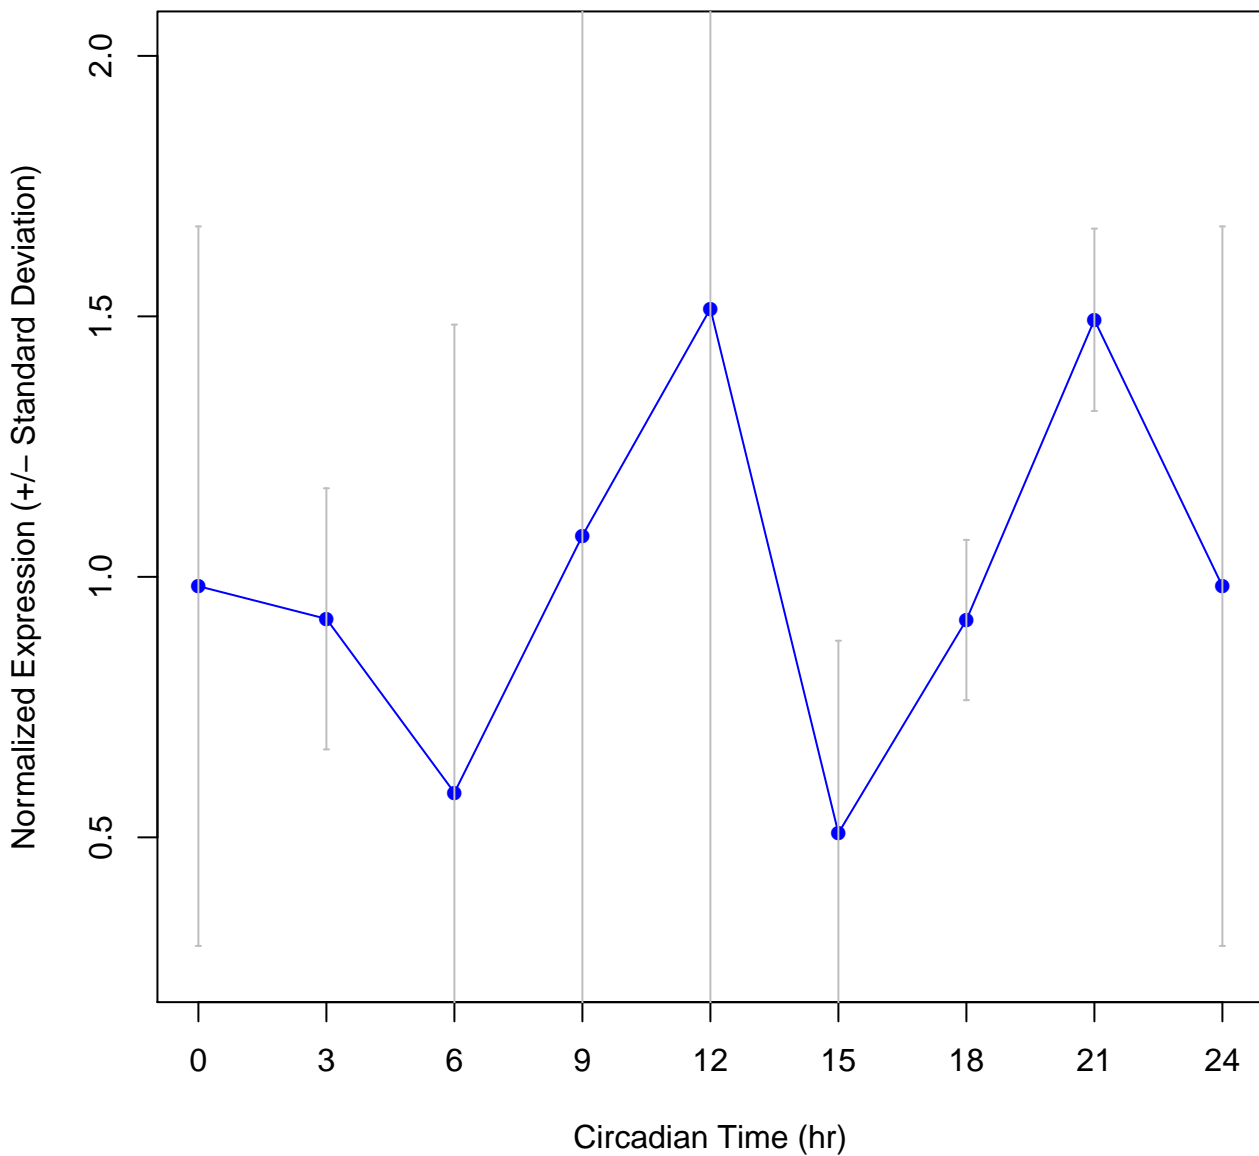

**Supplement Figure 5 aurka**

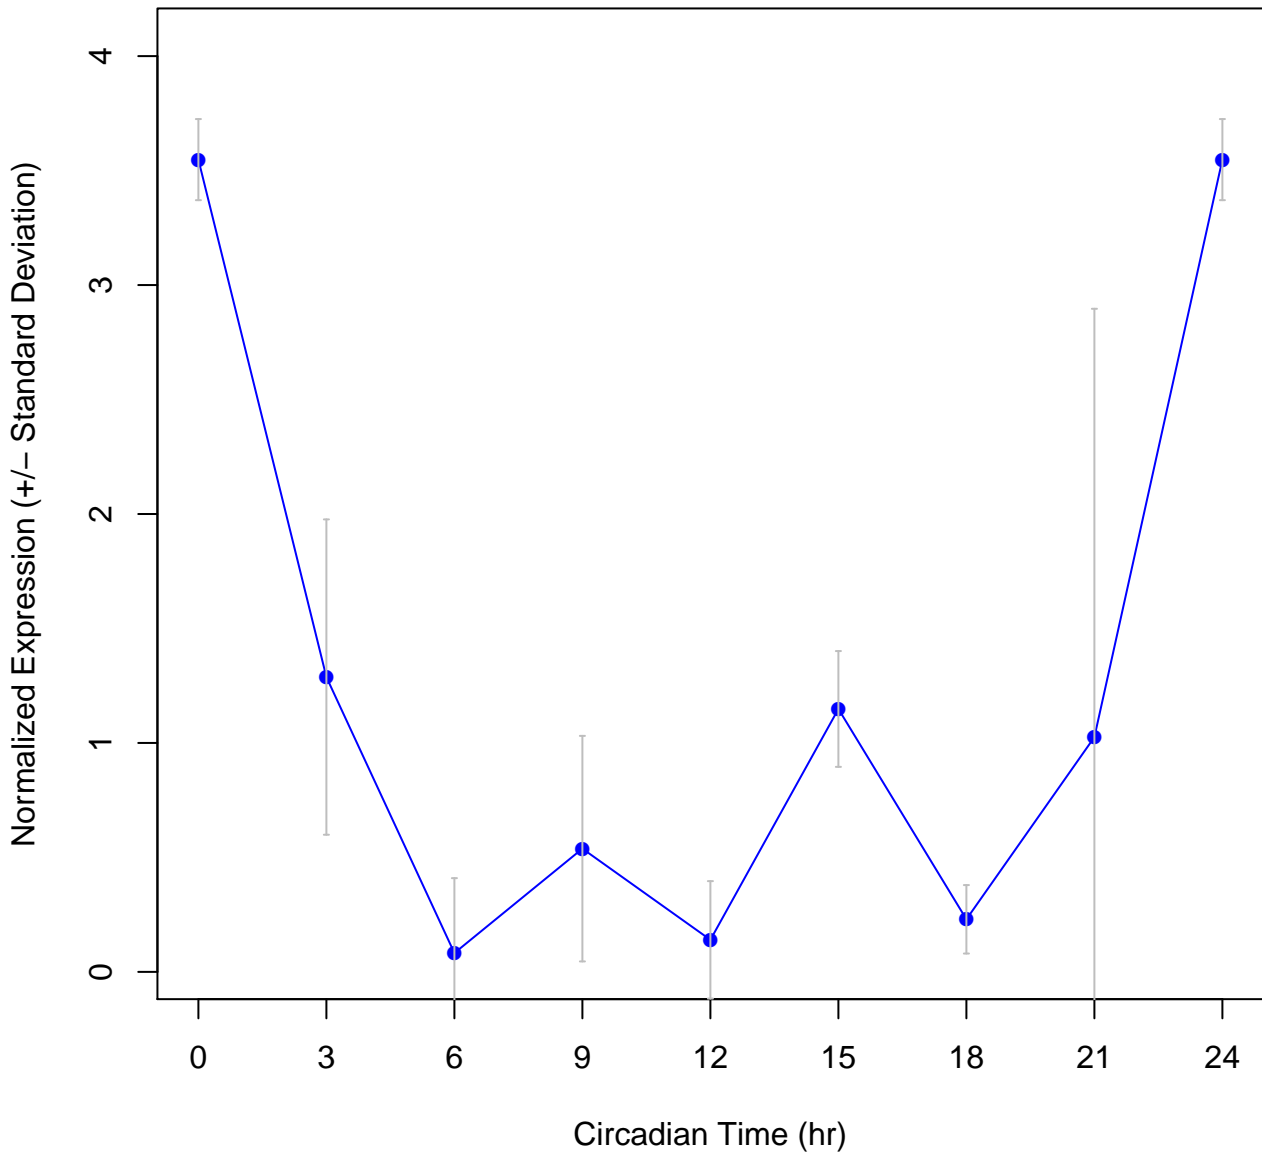

Supplement Figure 5 bcl1

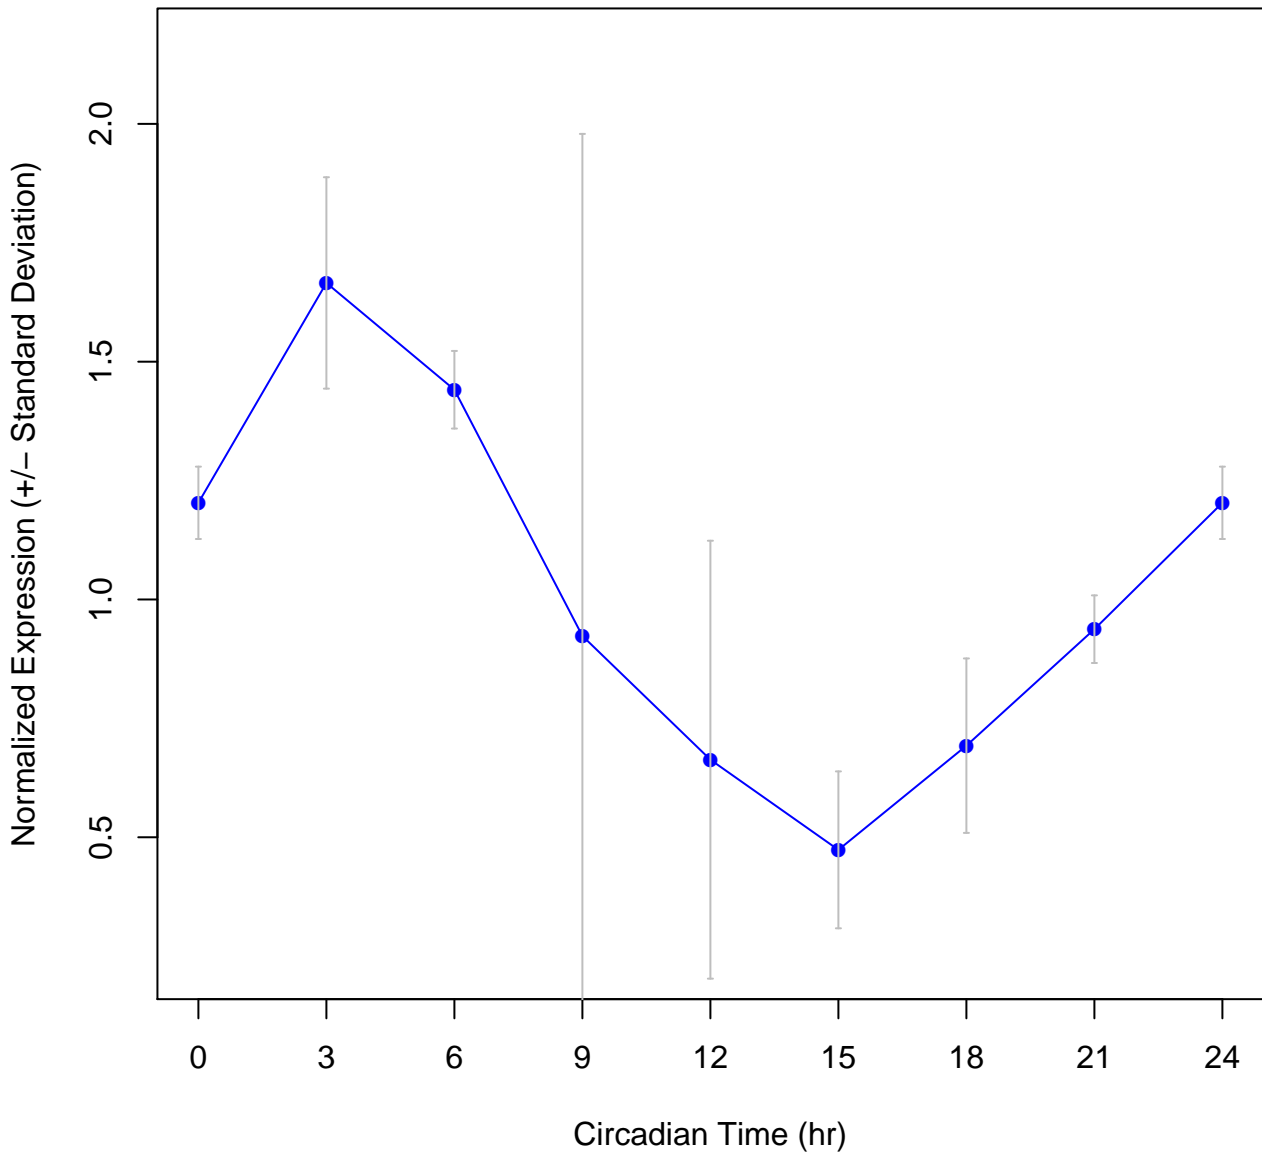

Supplement Figure 5 *bcl2*

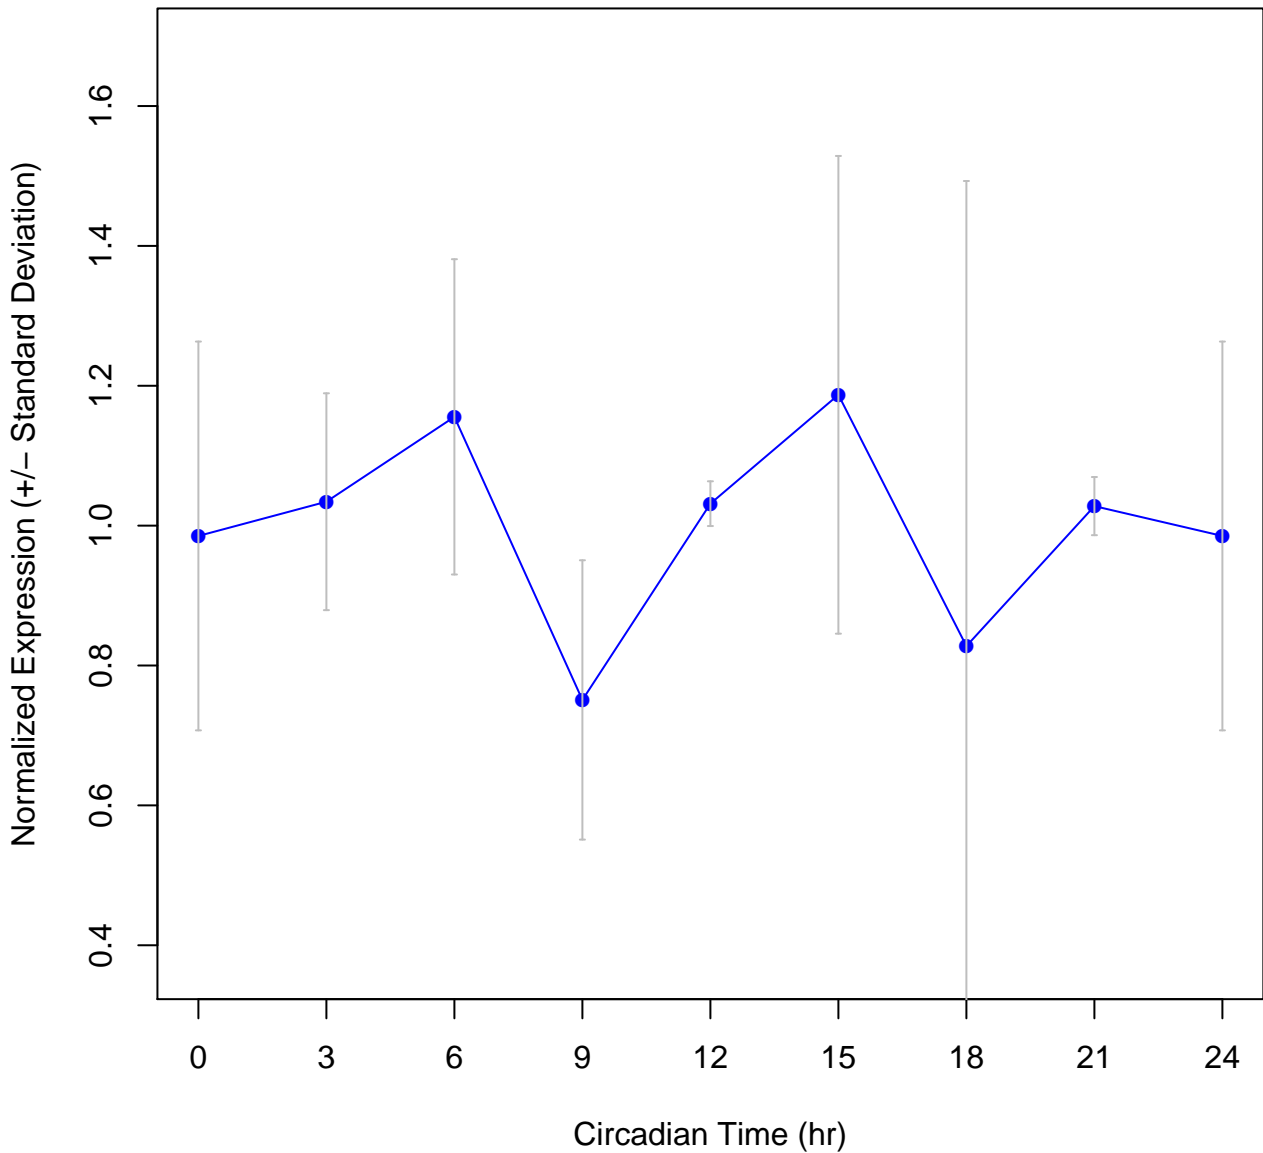

Supplement Figure 5 bhlhe40

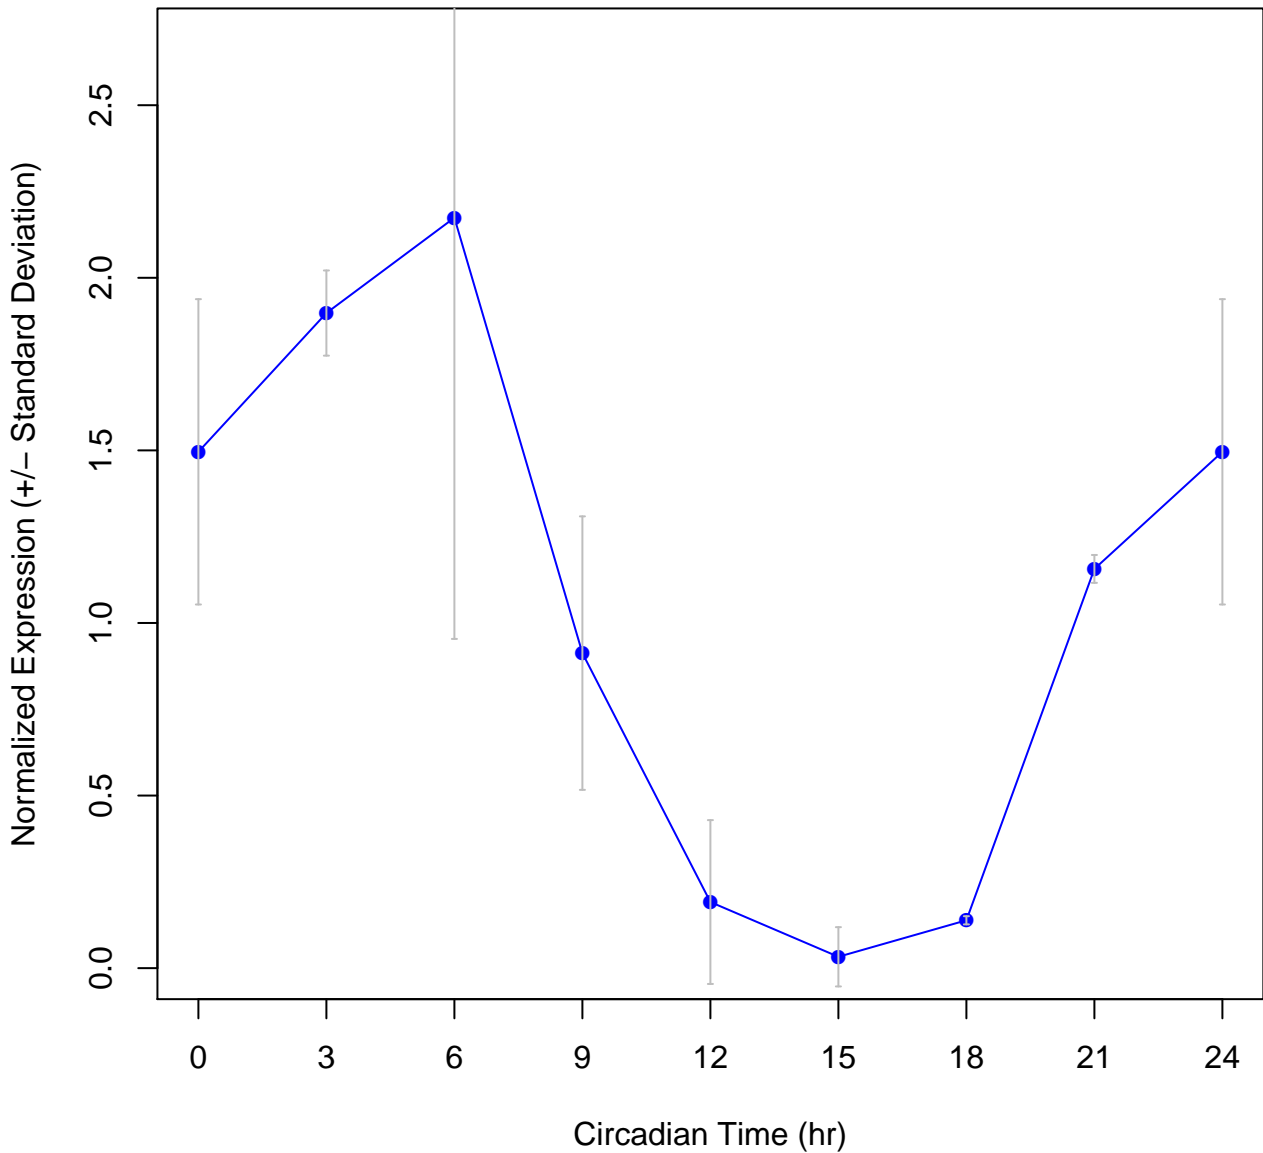

Supplement Figure 5 bmal1

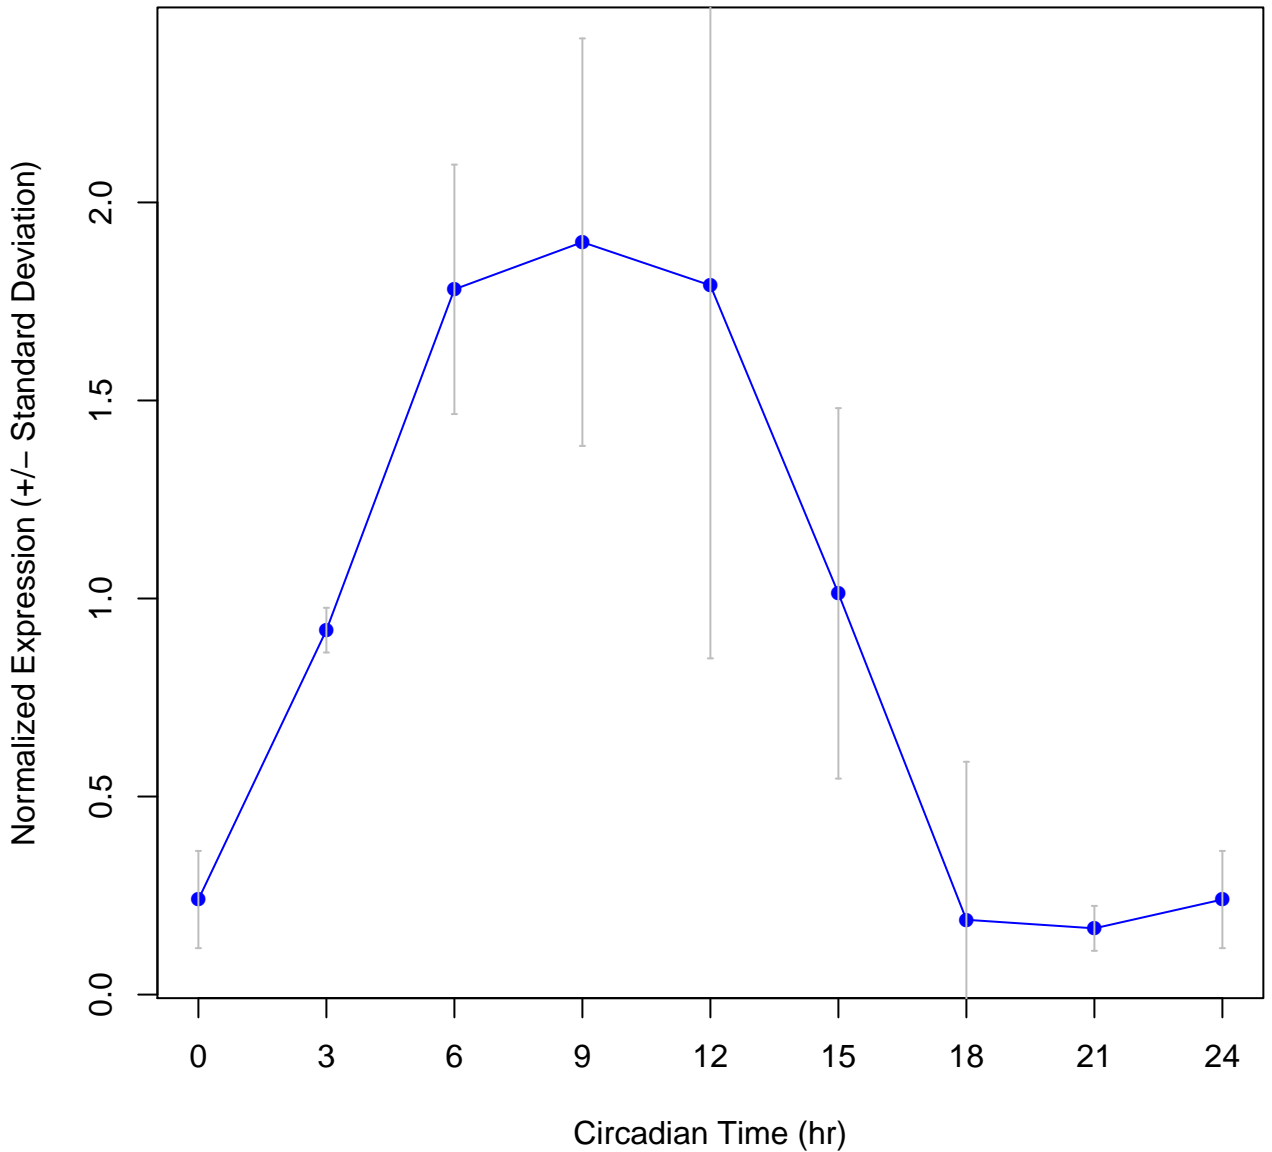

**Supplement Figure 5 bmp7**

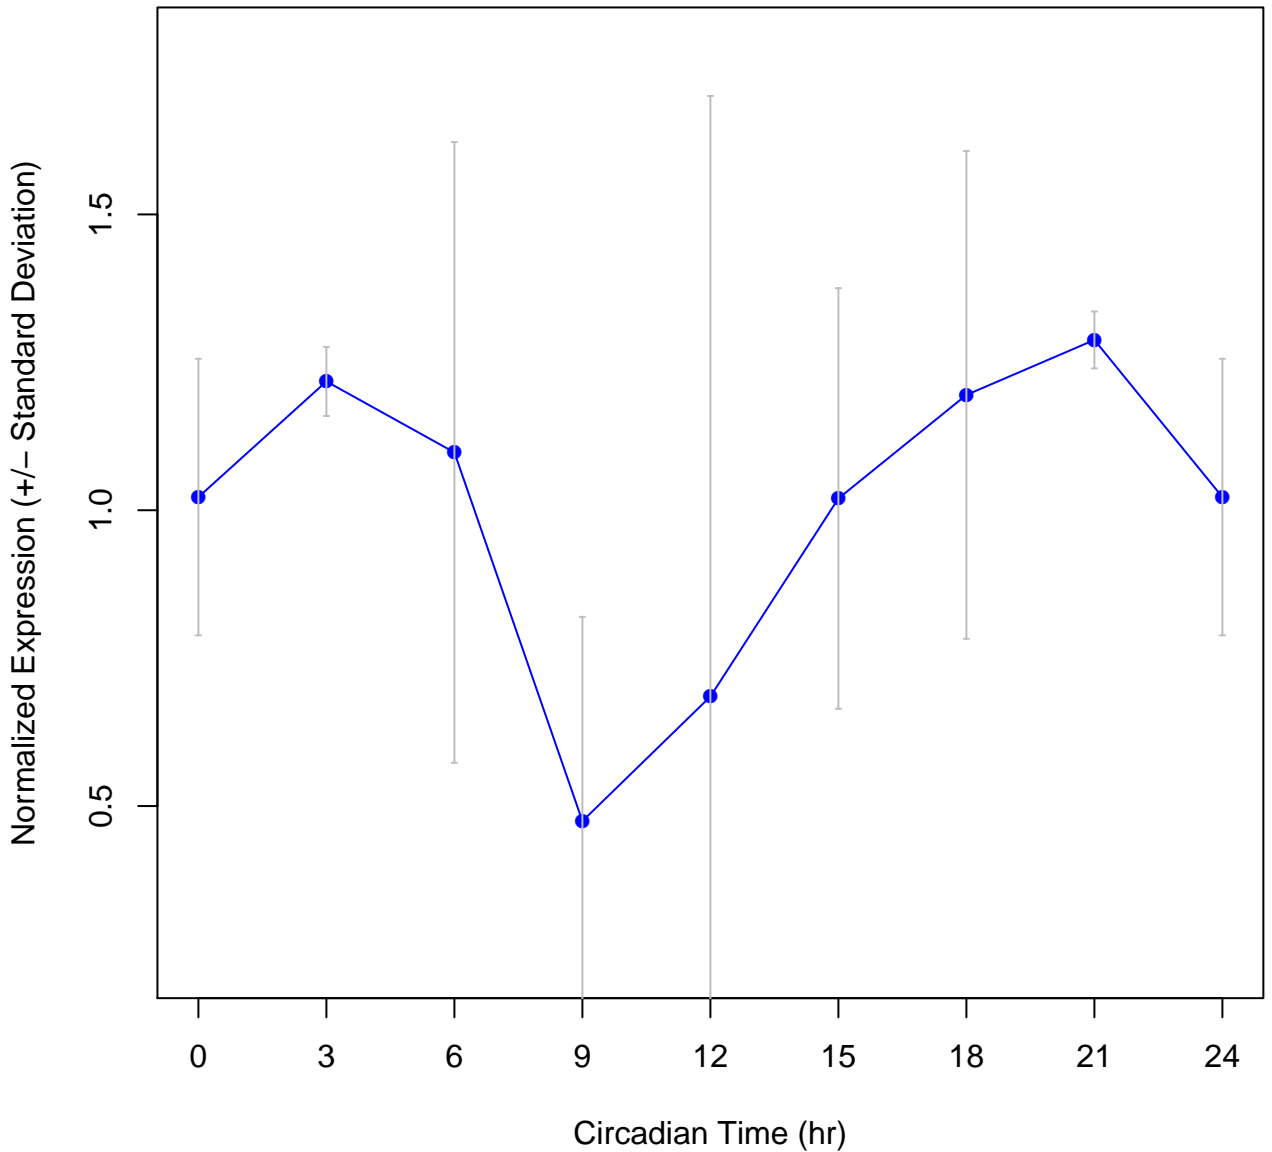

Supplement Figure 5 bmpr1b

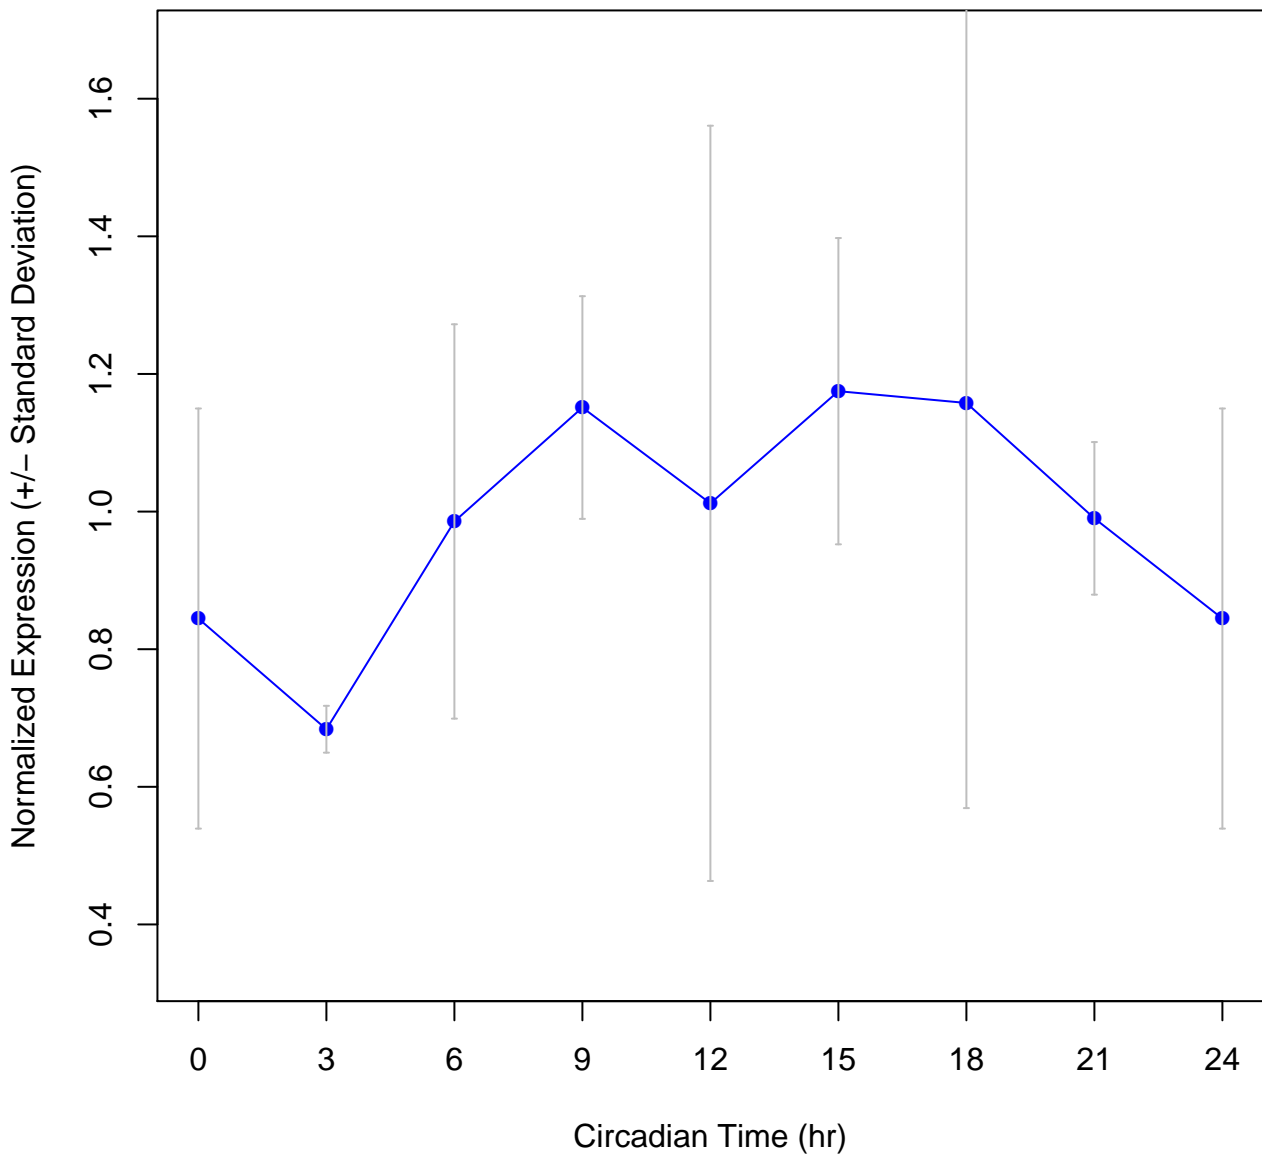



## Supplement Figure 5 bora

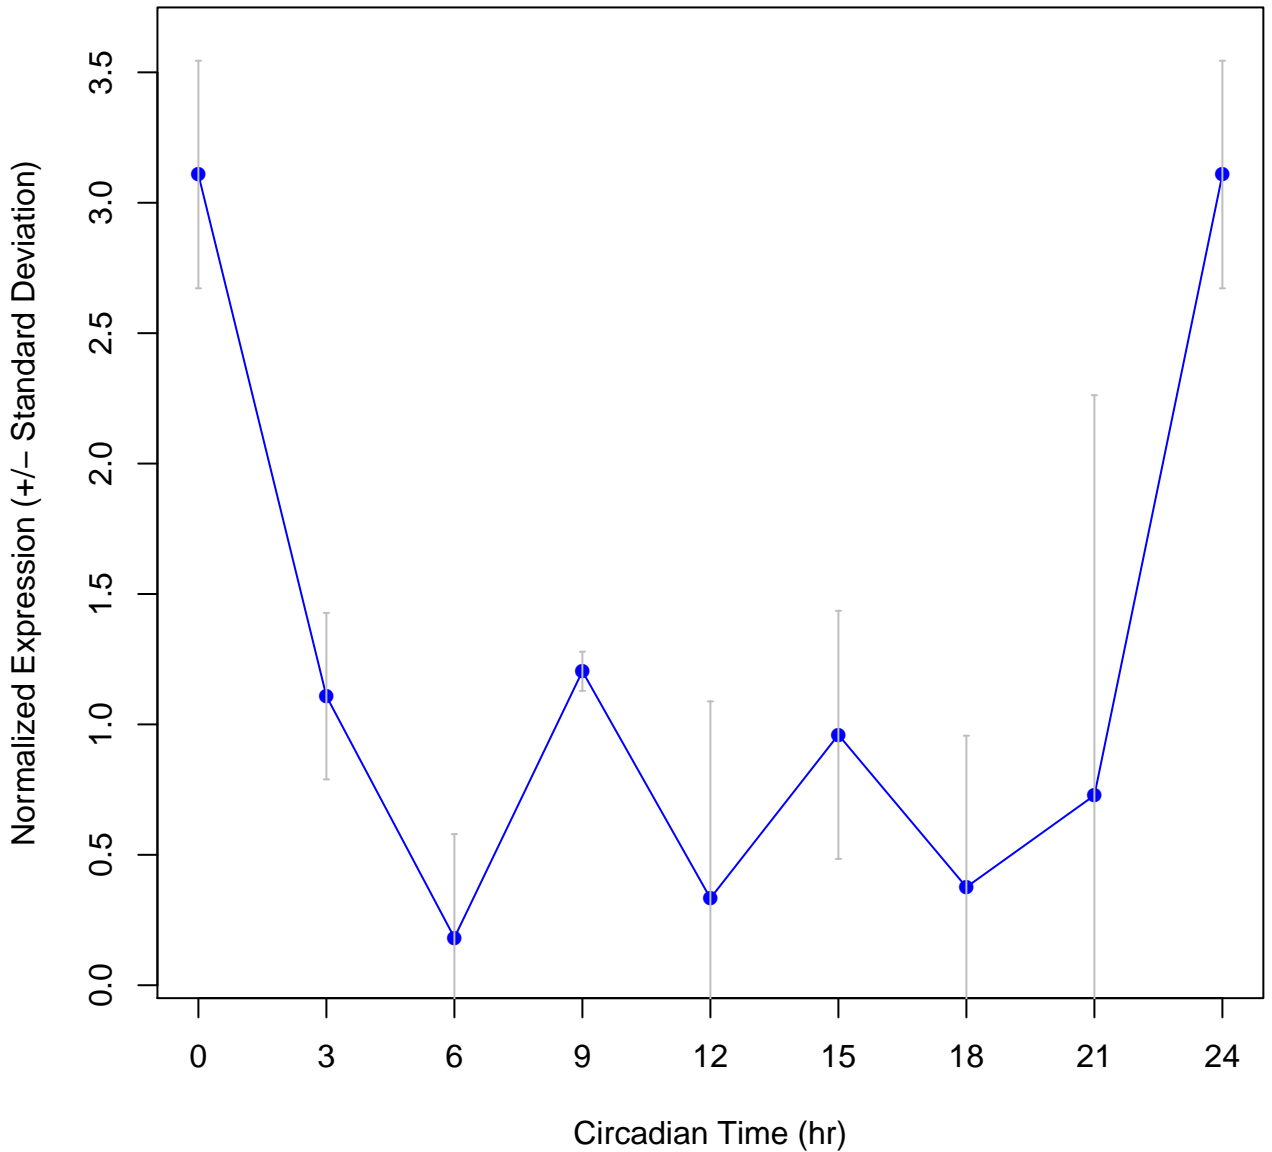

Supplement Figure 5 brca2

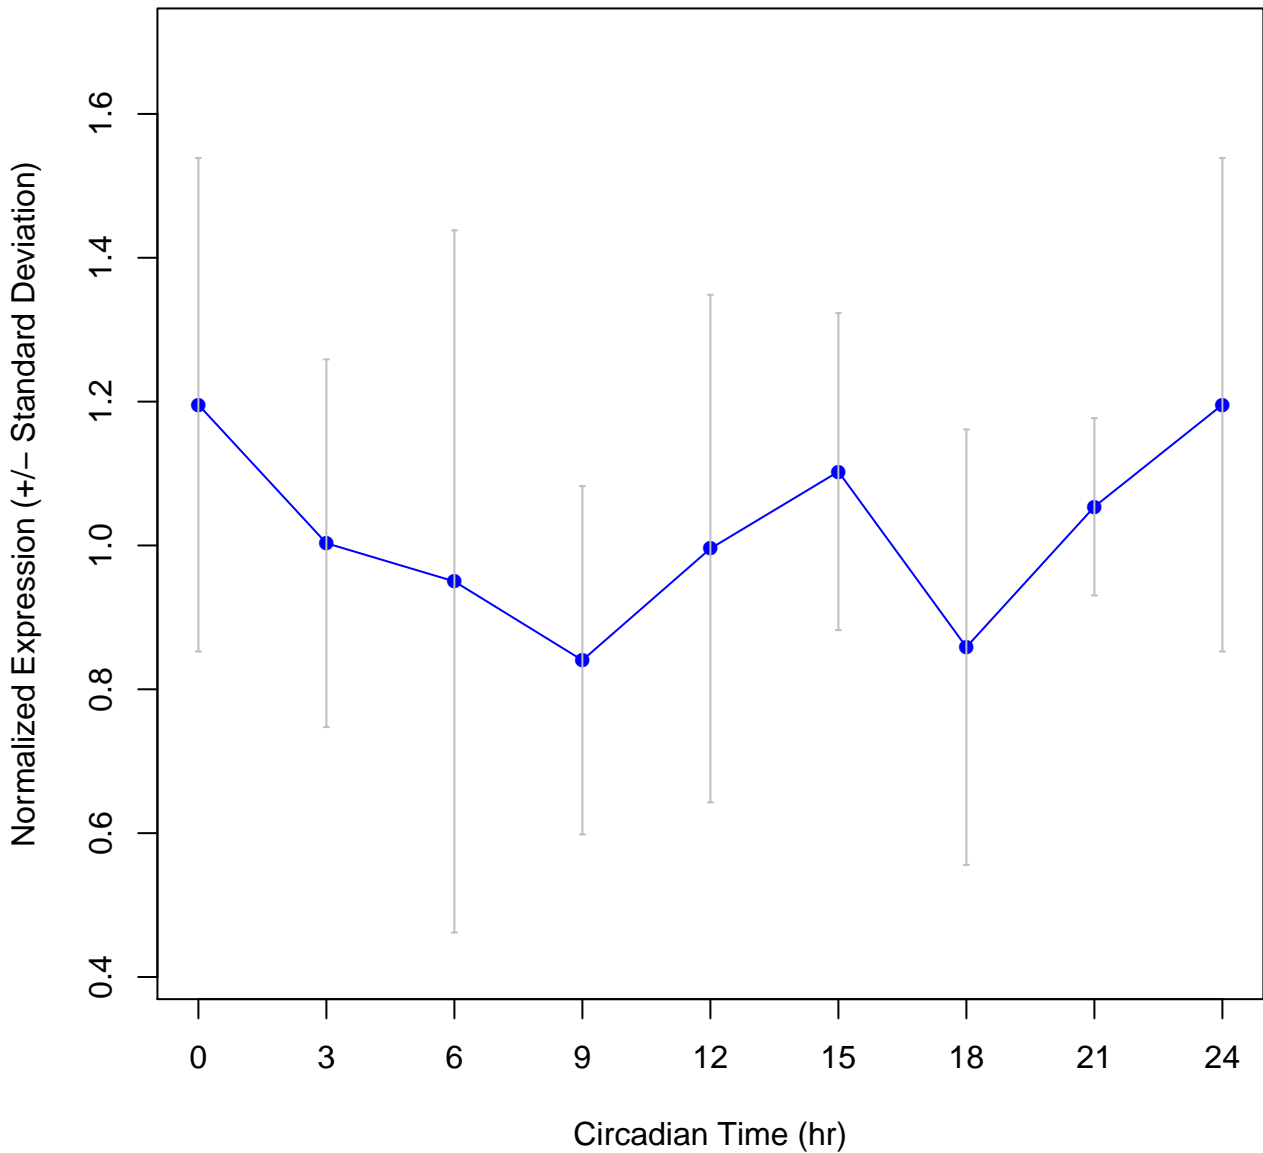

Supplement Figure 5 camk1g

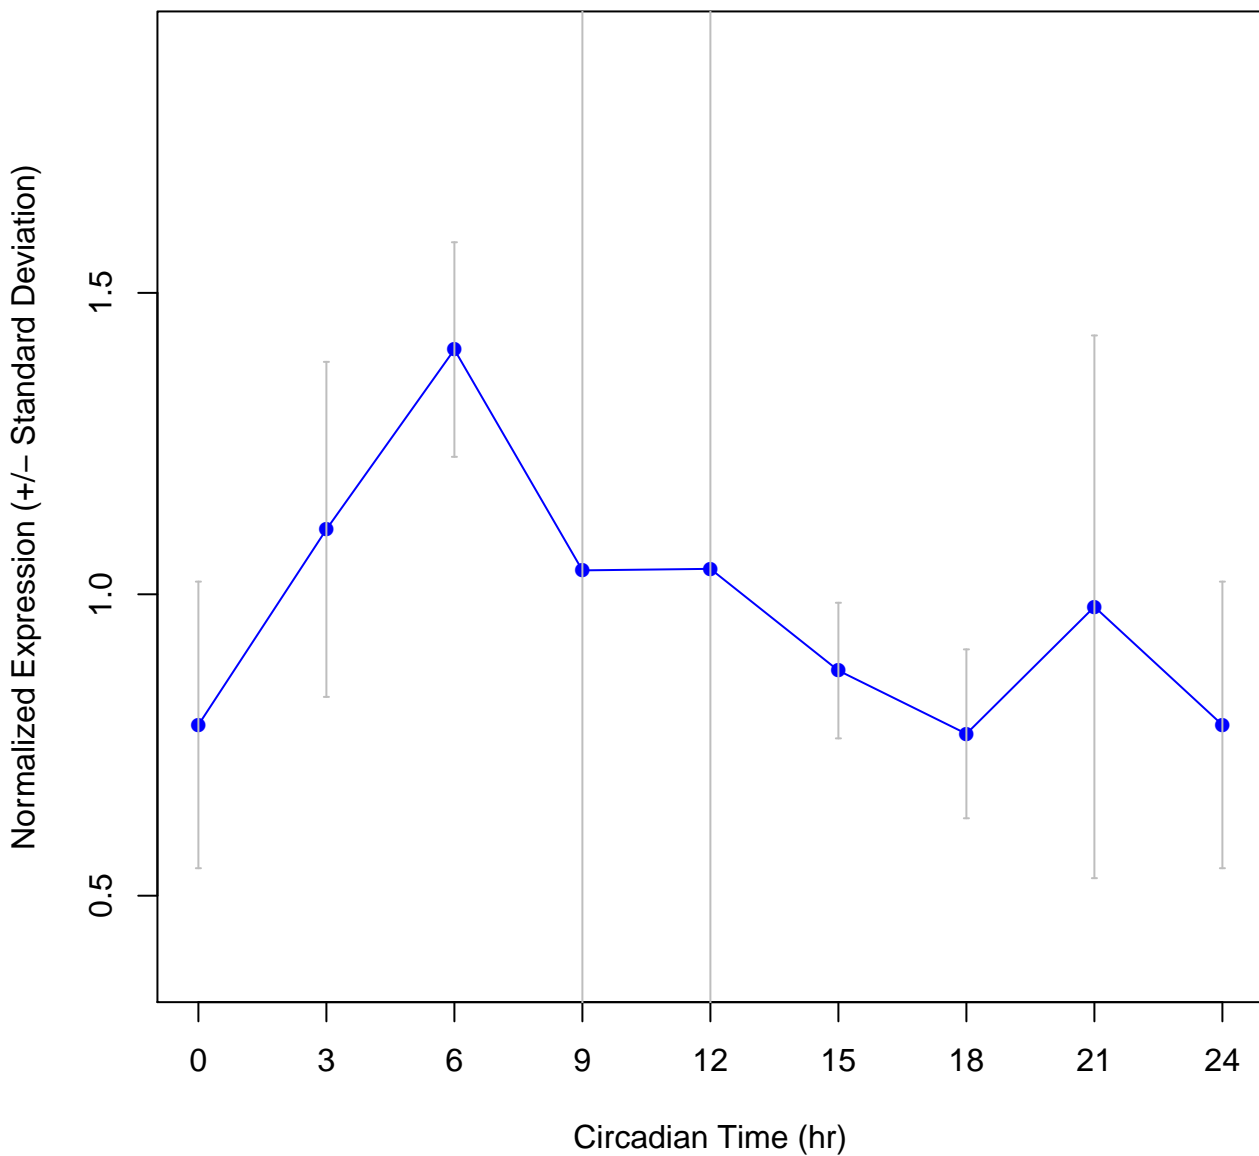

Supplement Figure 5 camk2a

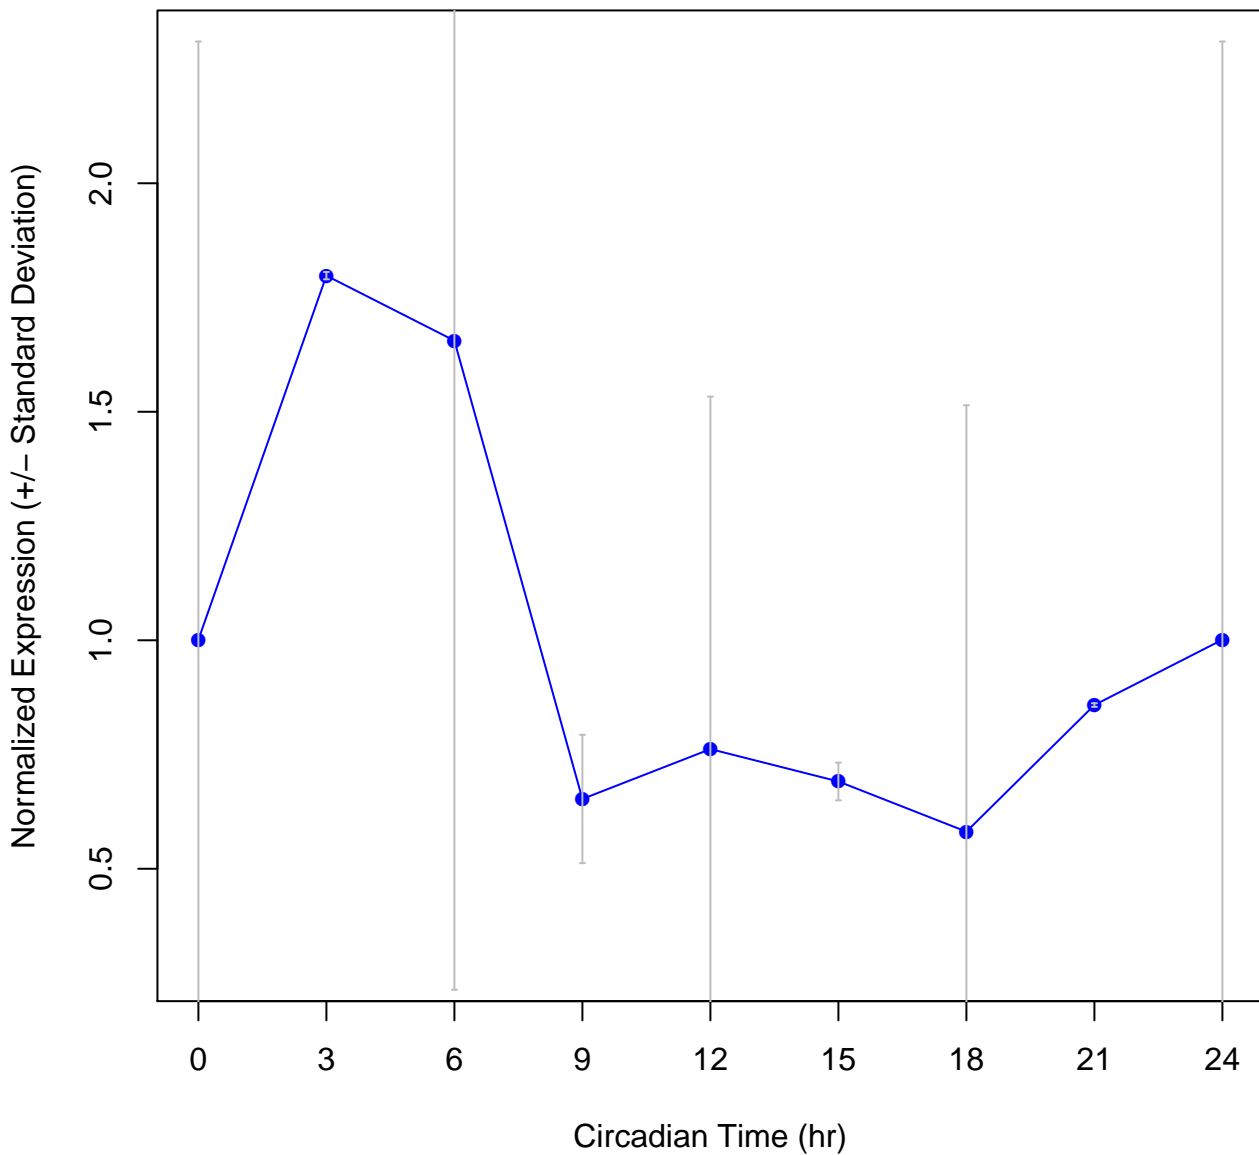

## Supplement Figure 5 ccnb1

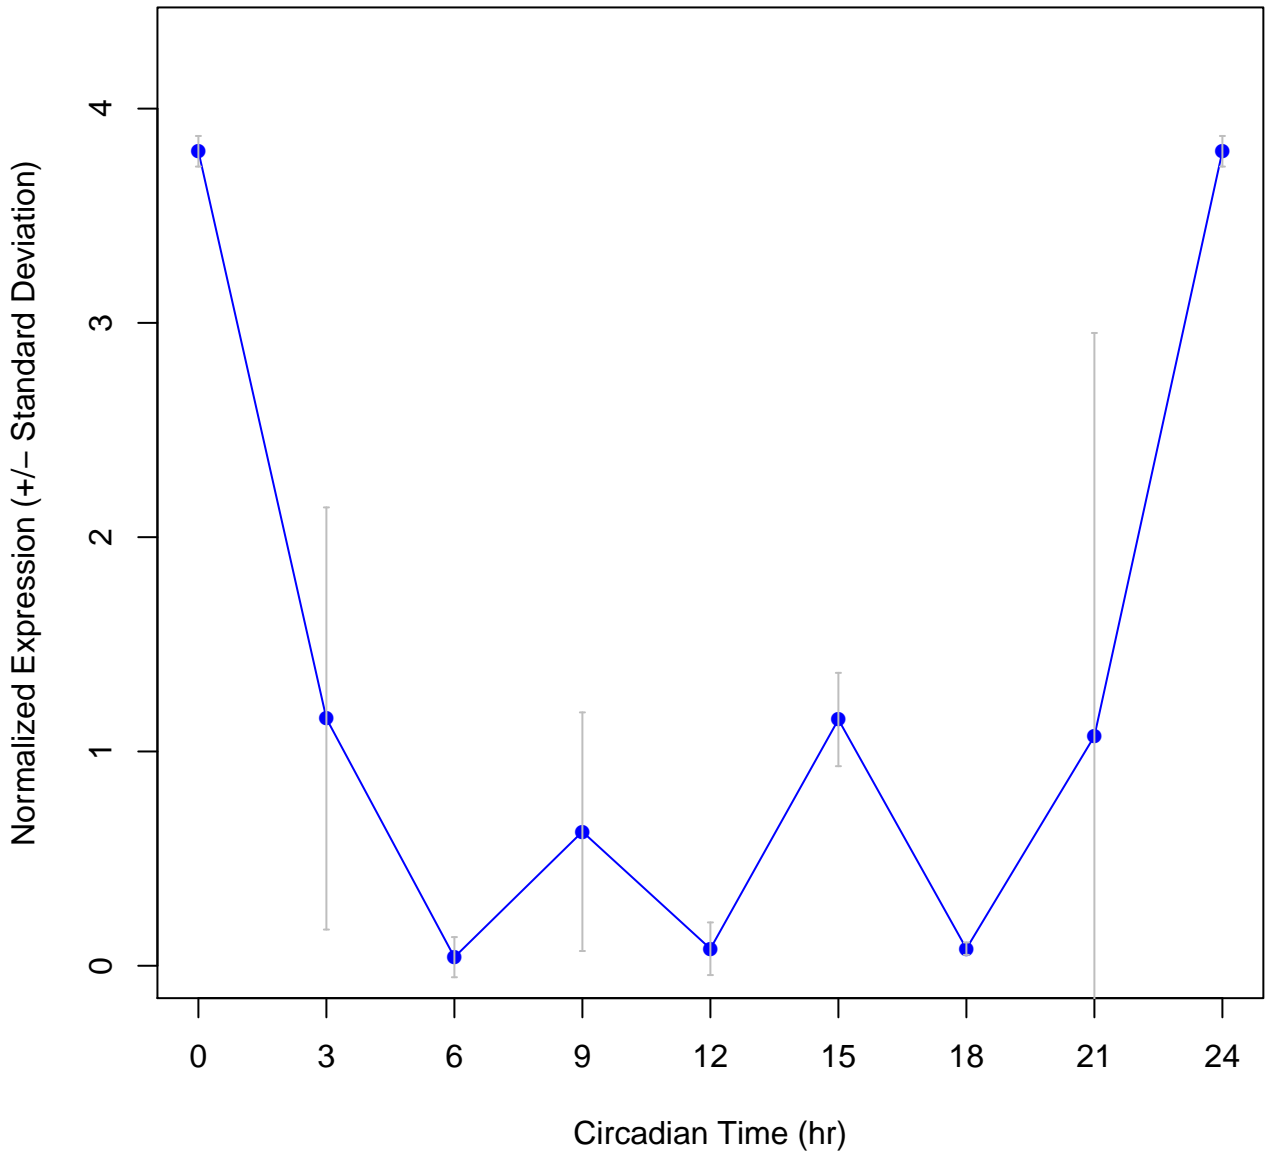

Supplement Figure 5 ccnb2

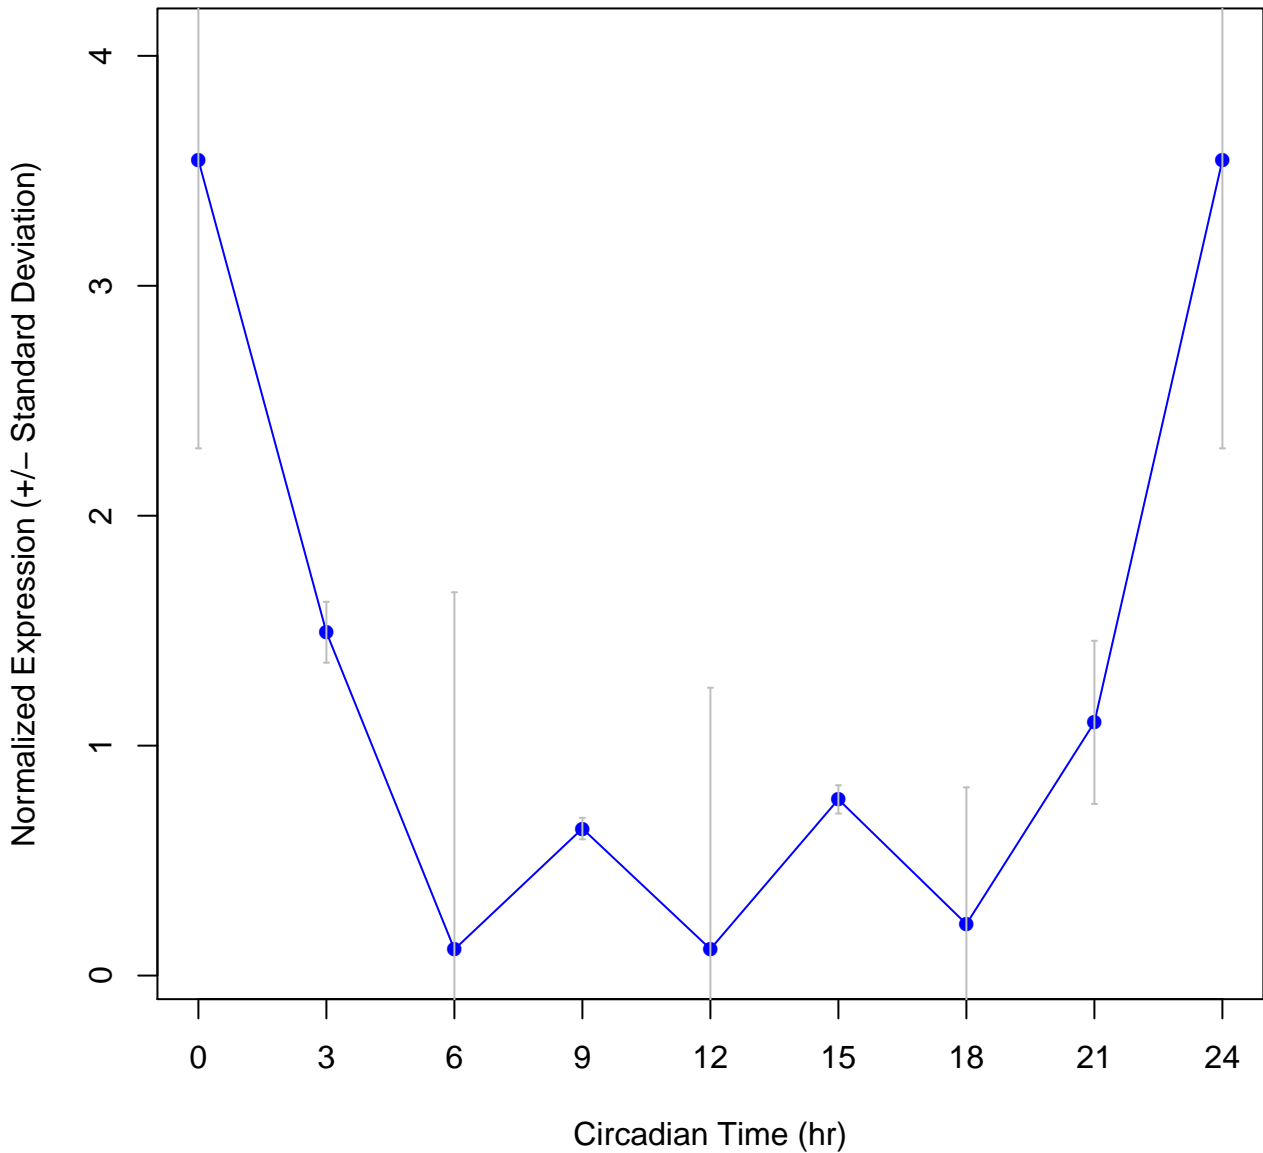

**Supplement Figure 5 ccnb3**

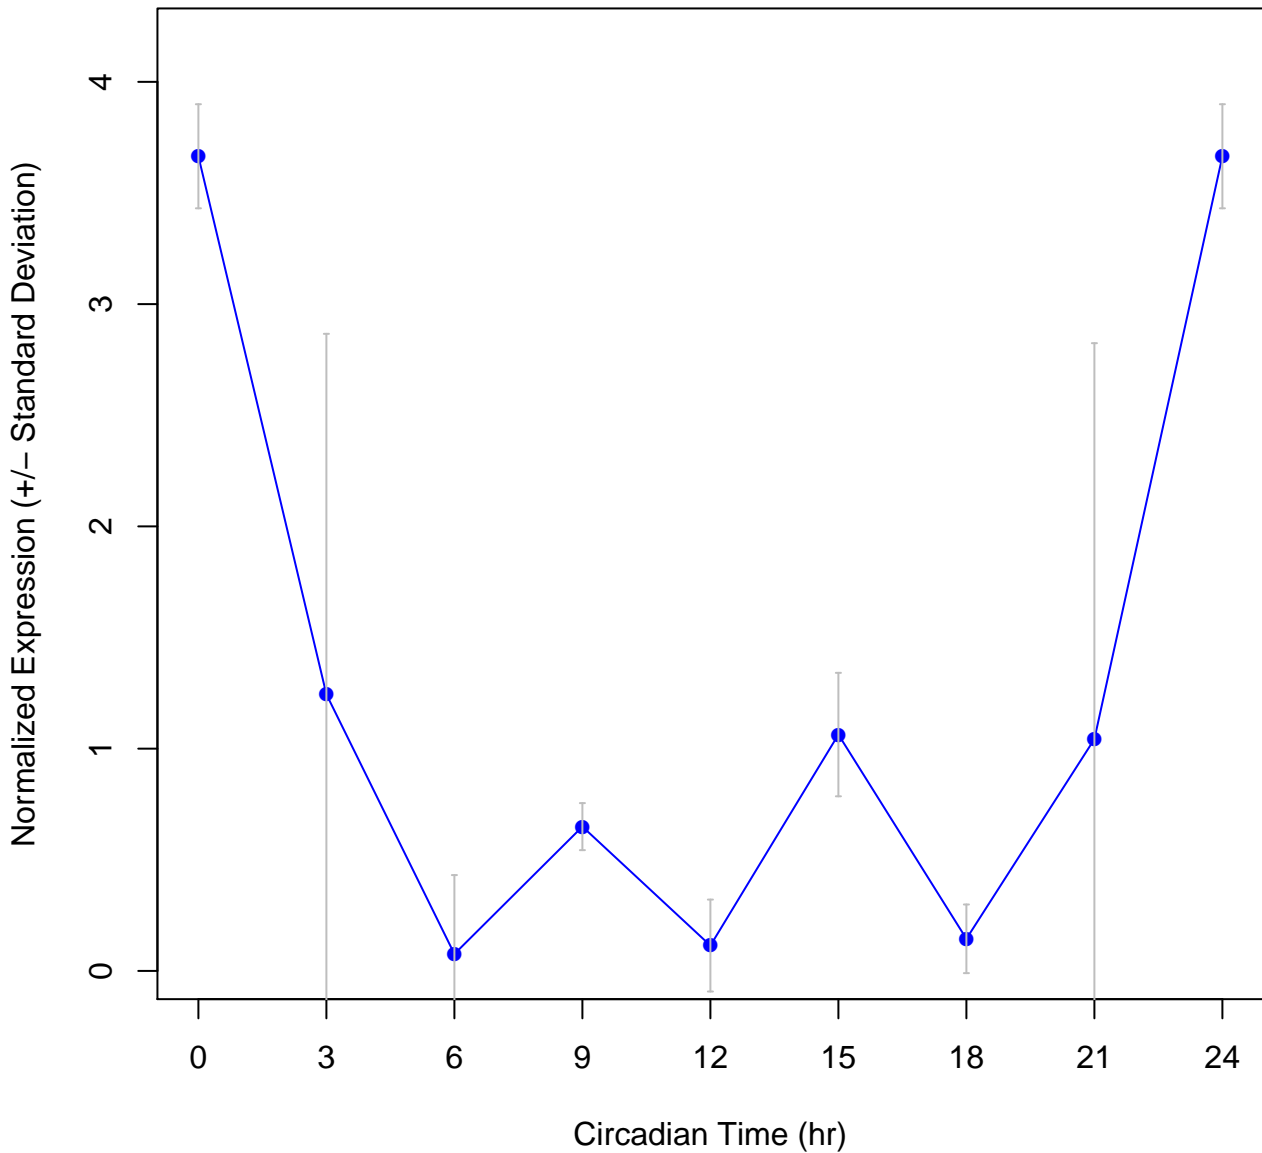

# Supplement Figure 5 ccnf

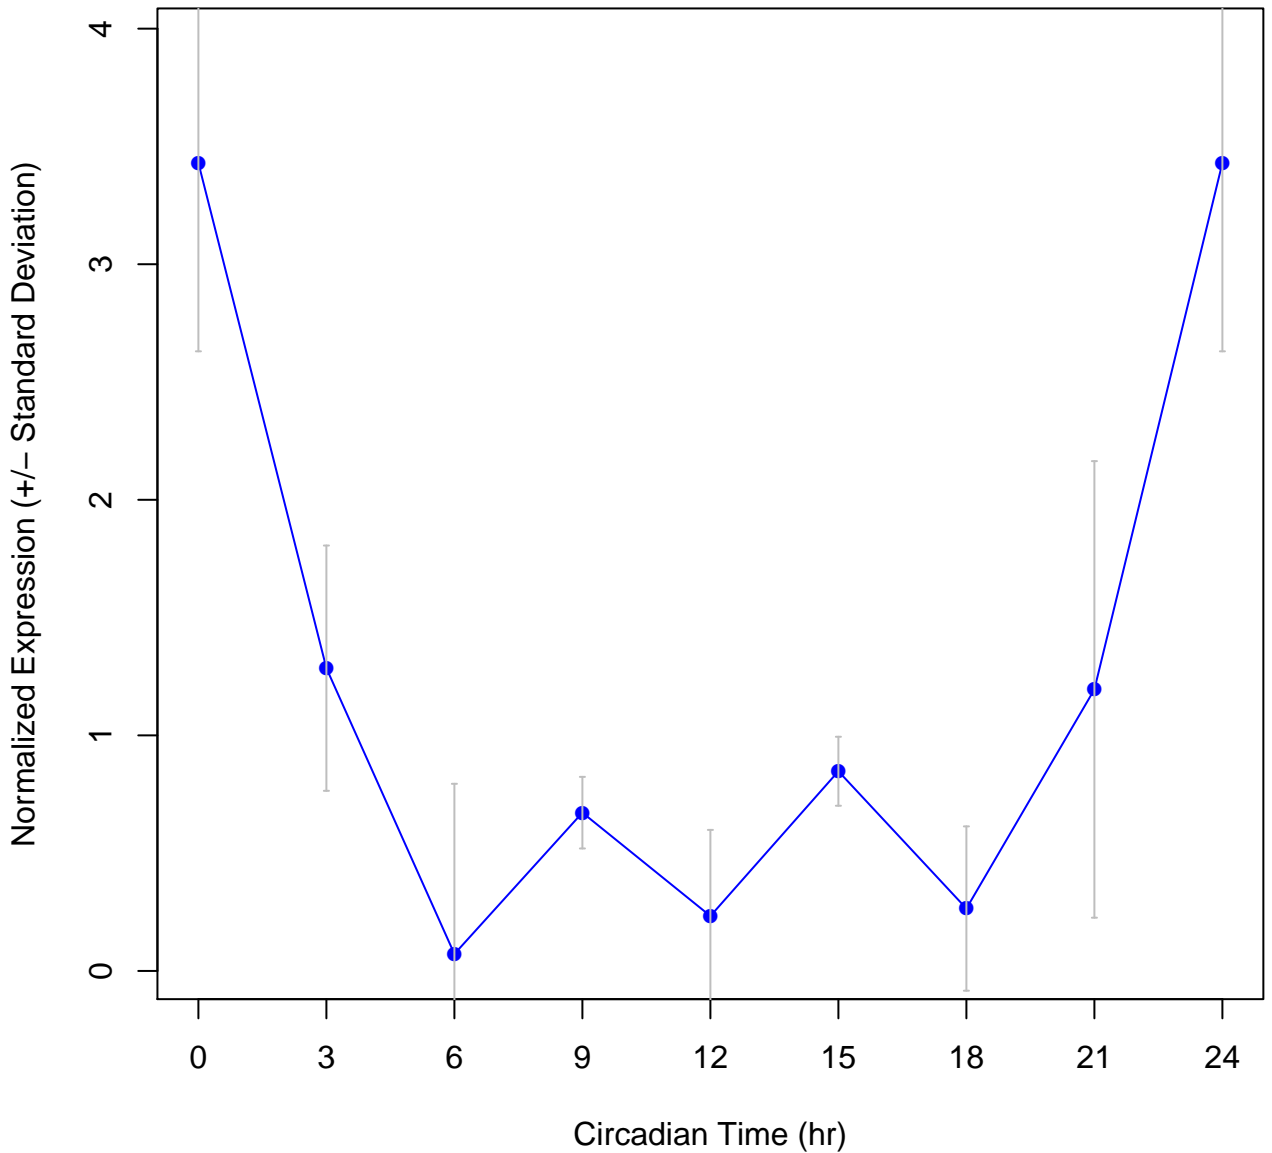



**Supplement Figure 5 cd44**

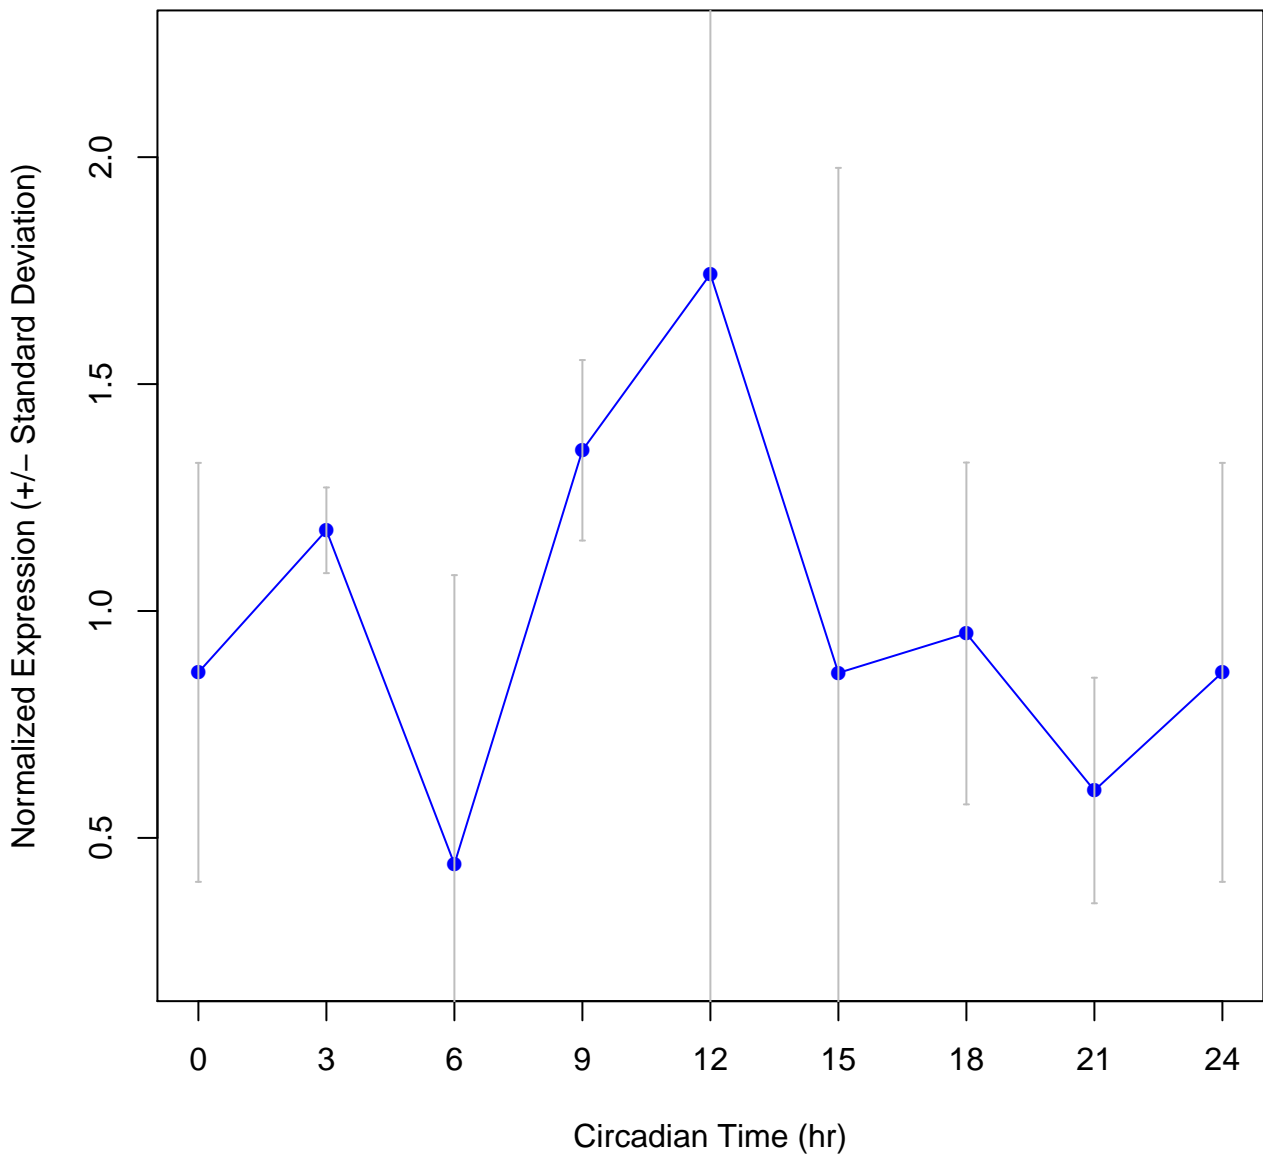

**Supplement Figure 5 cdc20**

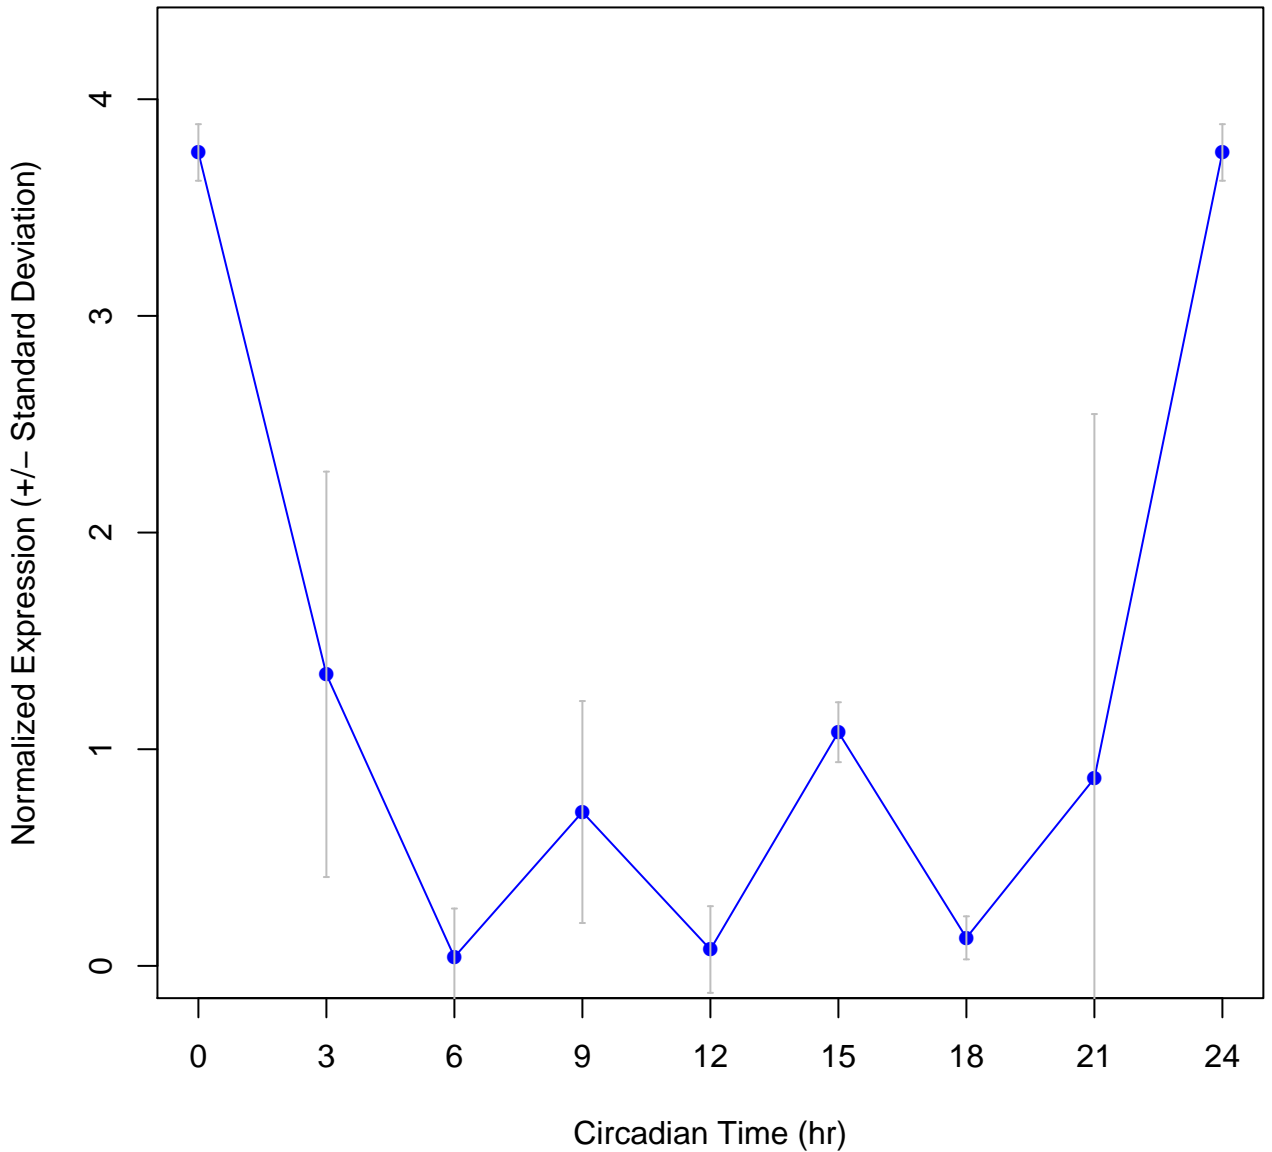

Supplement Figure 5 *cdc25b*

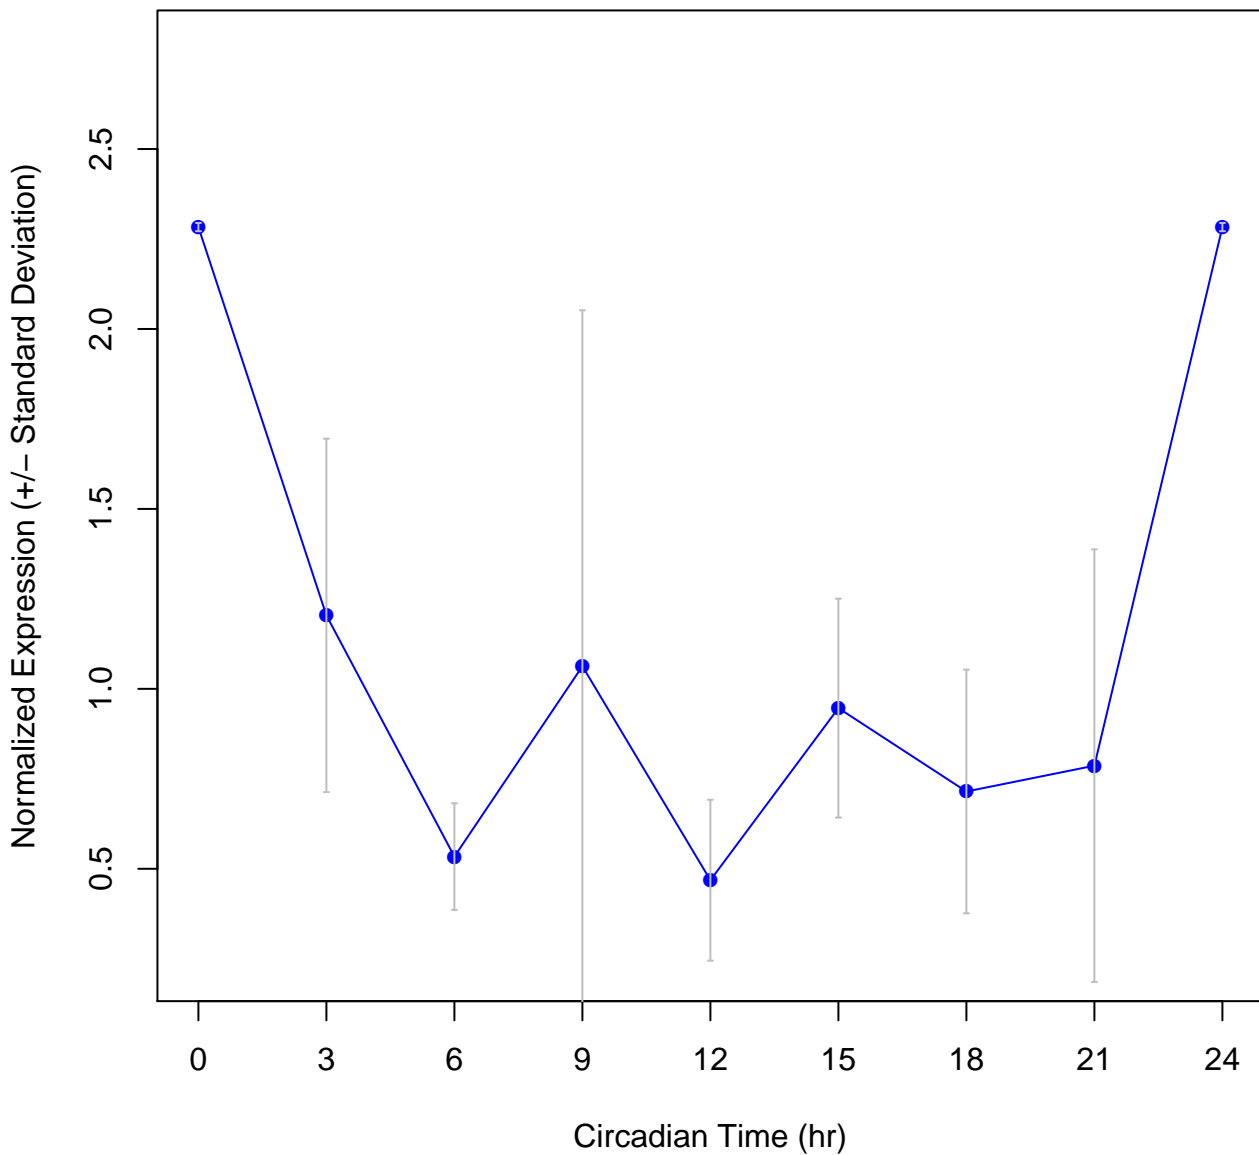

## Supplement Figure 5 cdca7

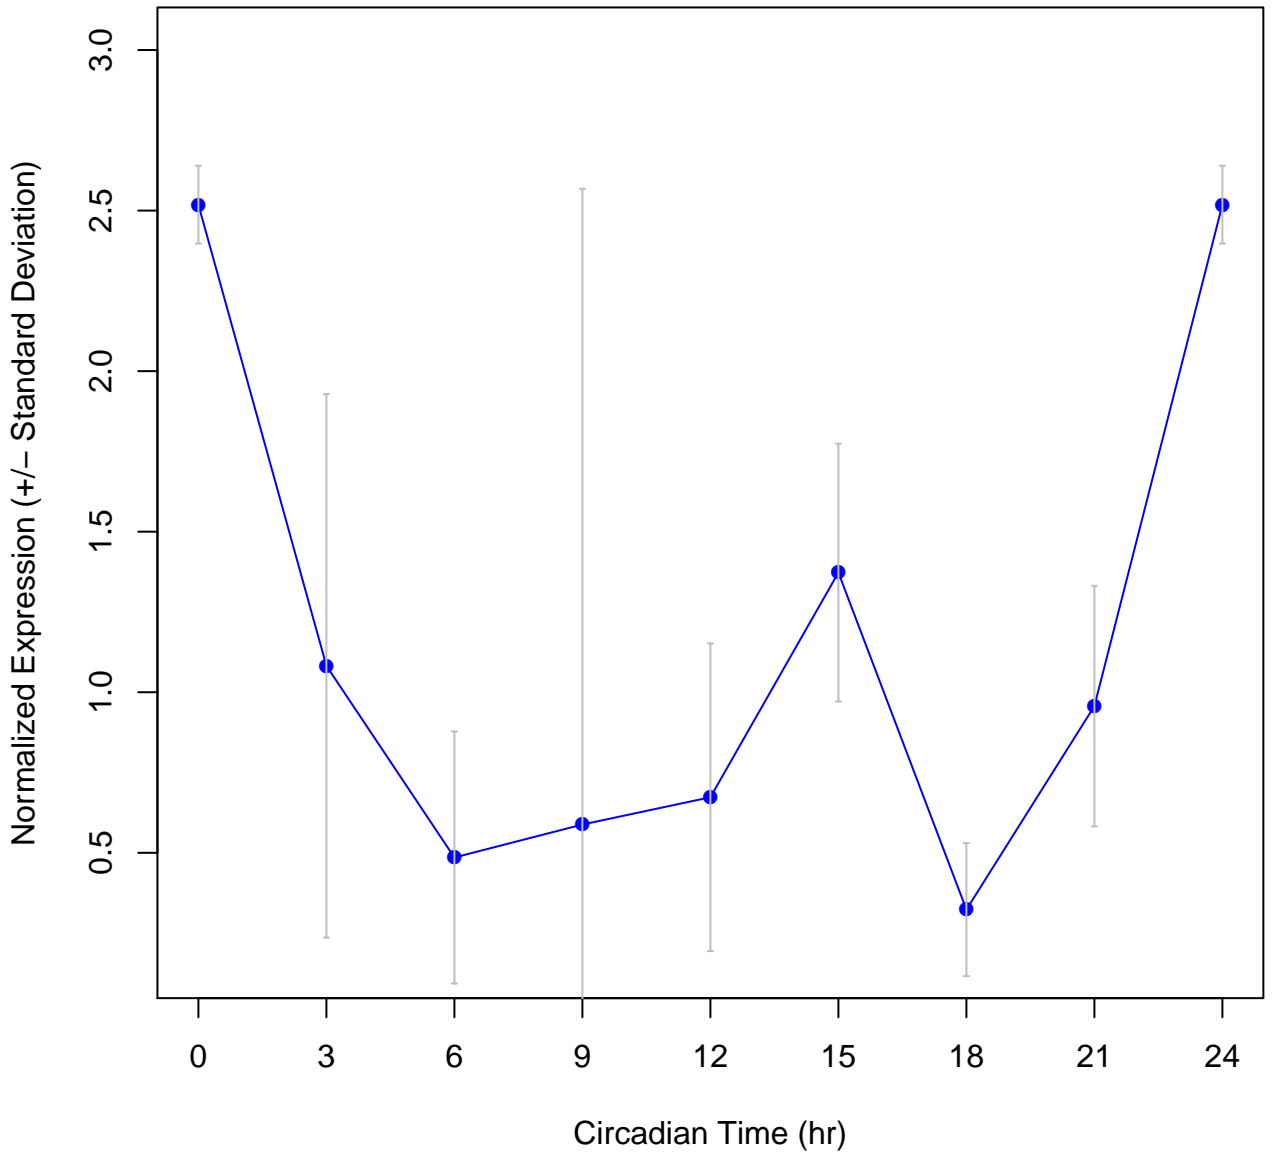

Supplement Figure 5 cdh15

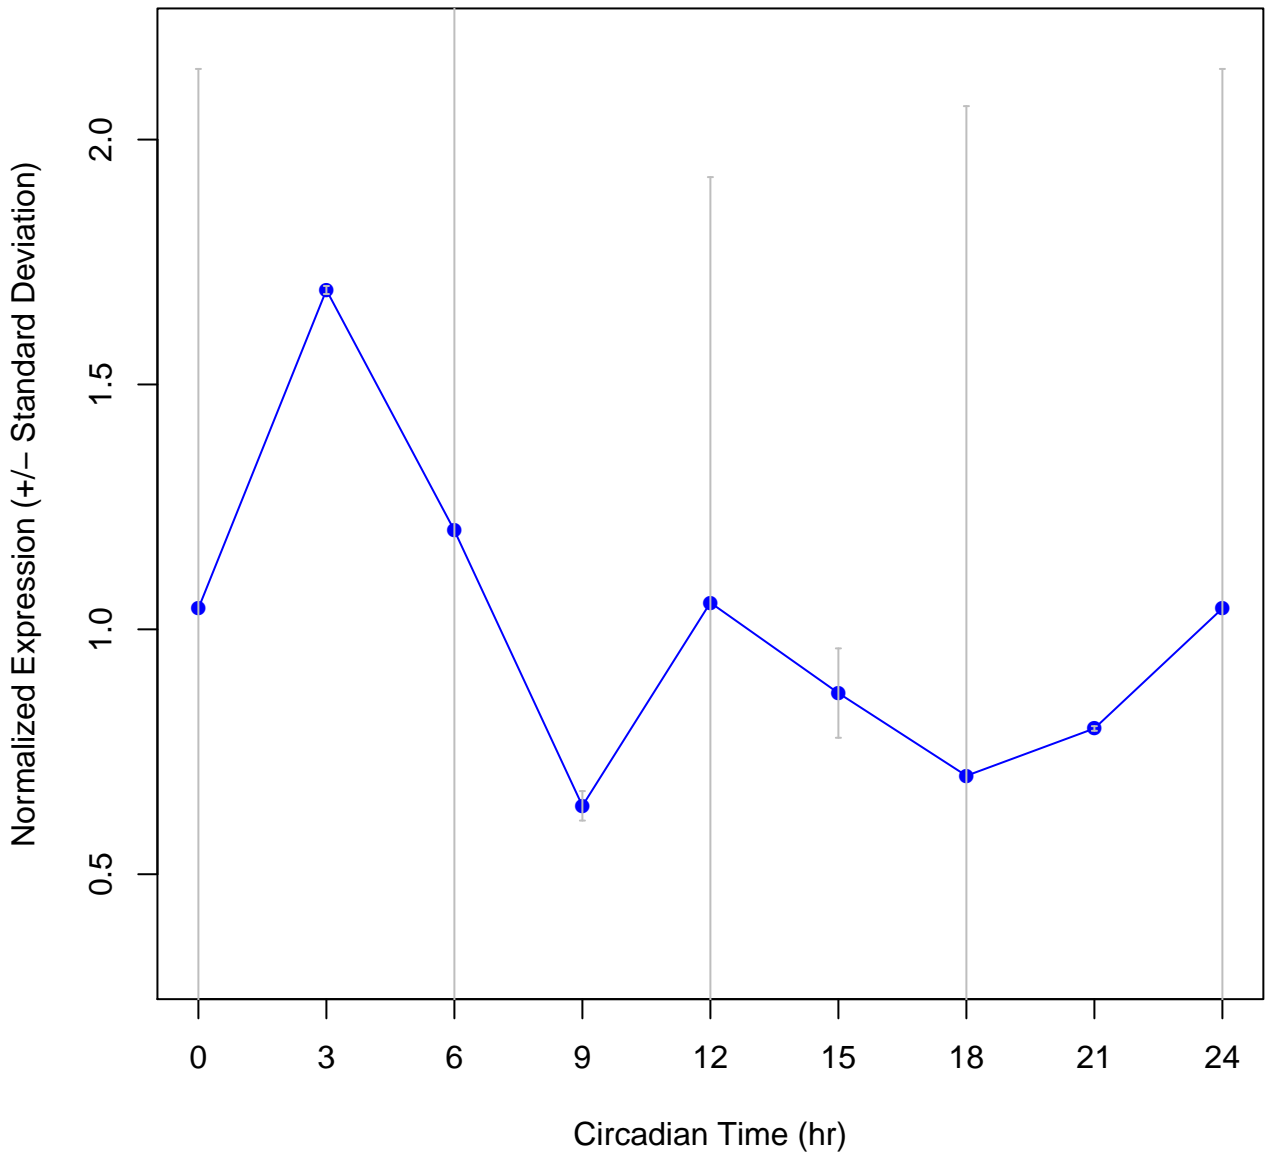

## Supplement Figure 5 cdk1

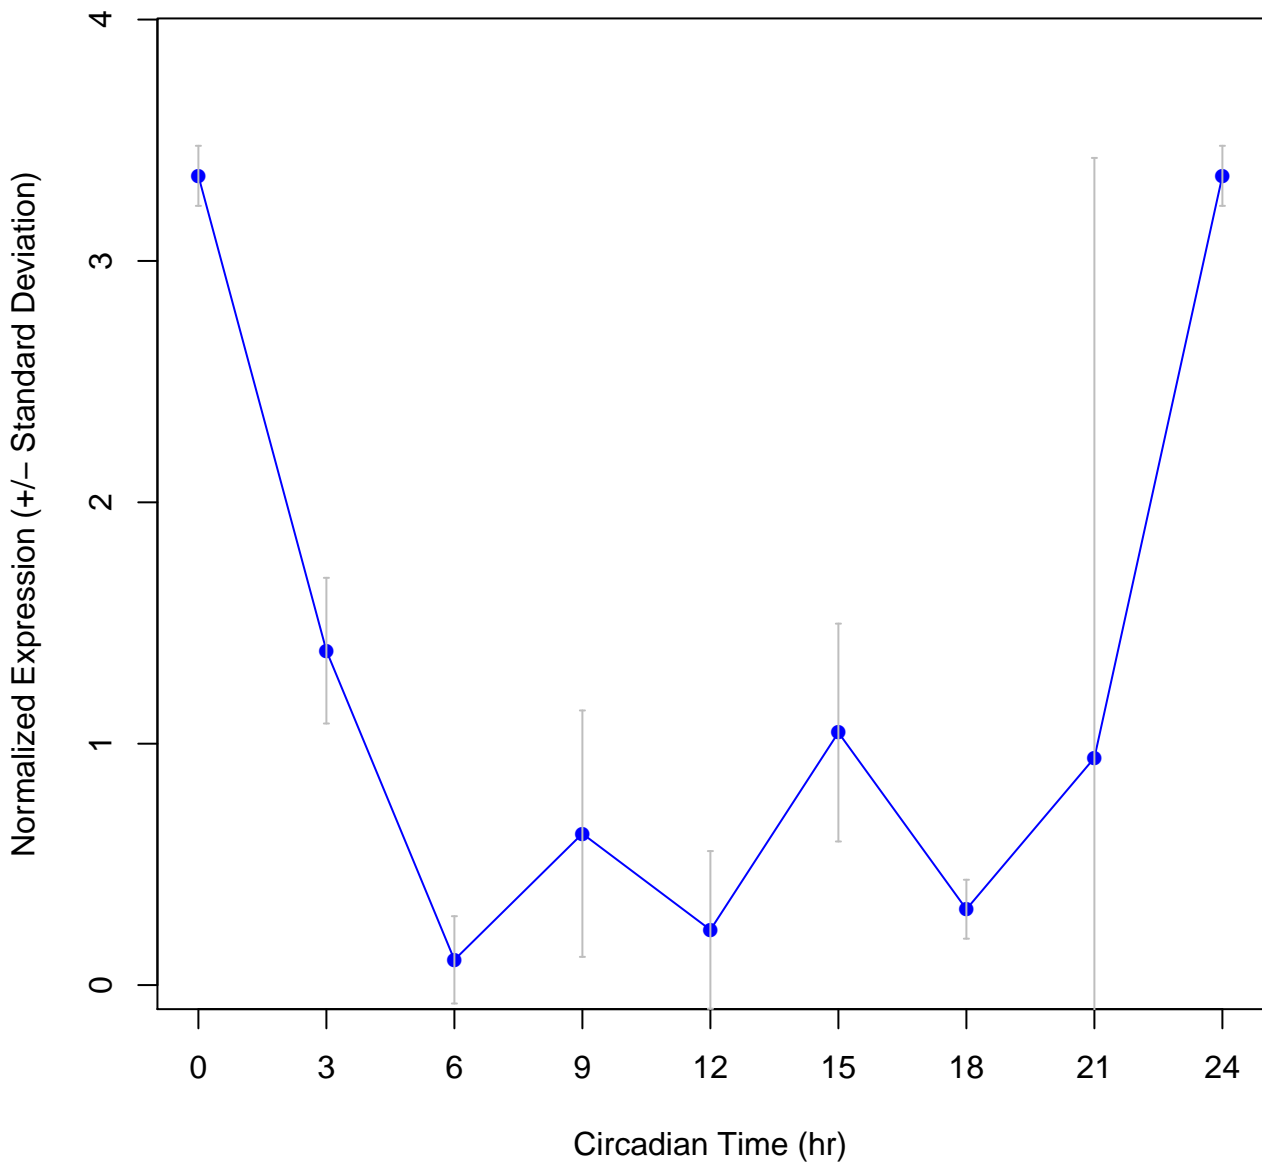

**Supplement Figure 5 cdk7**

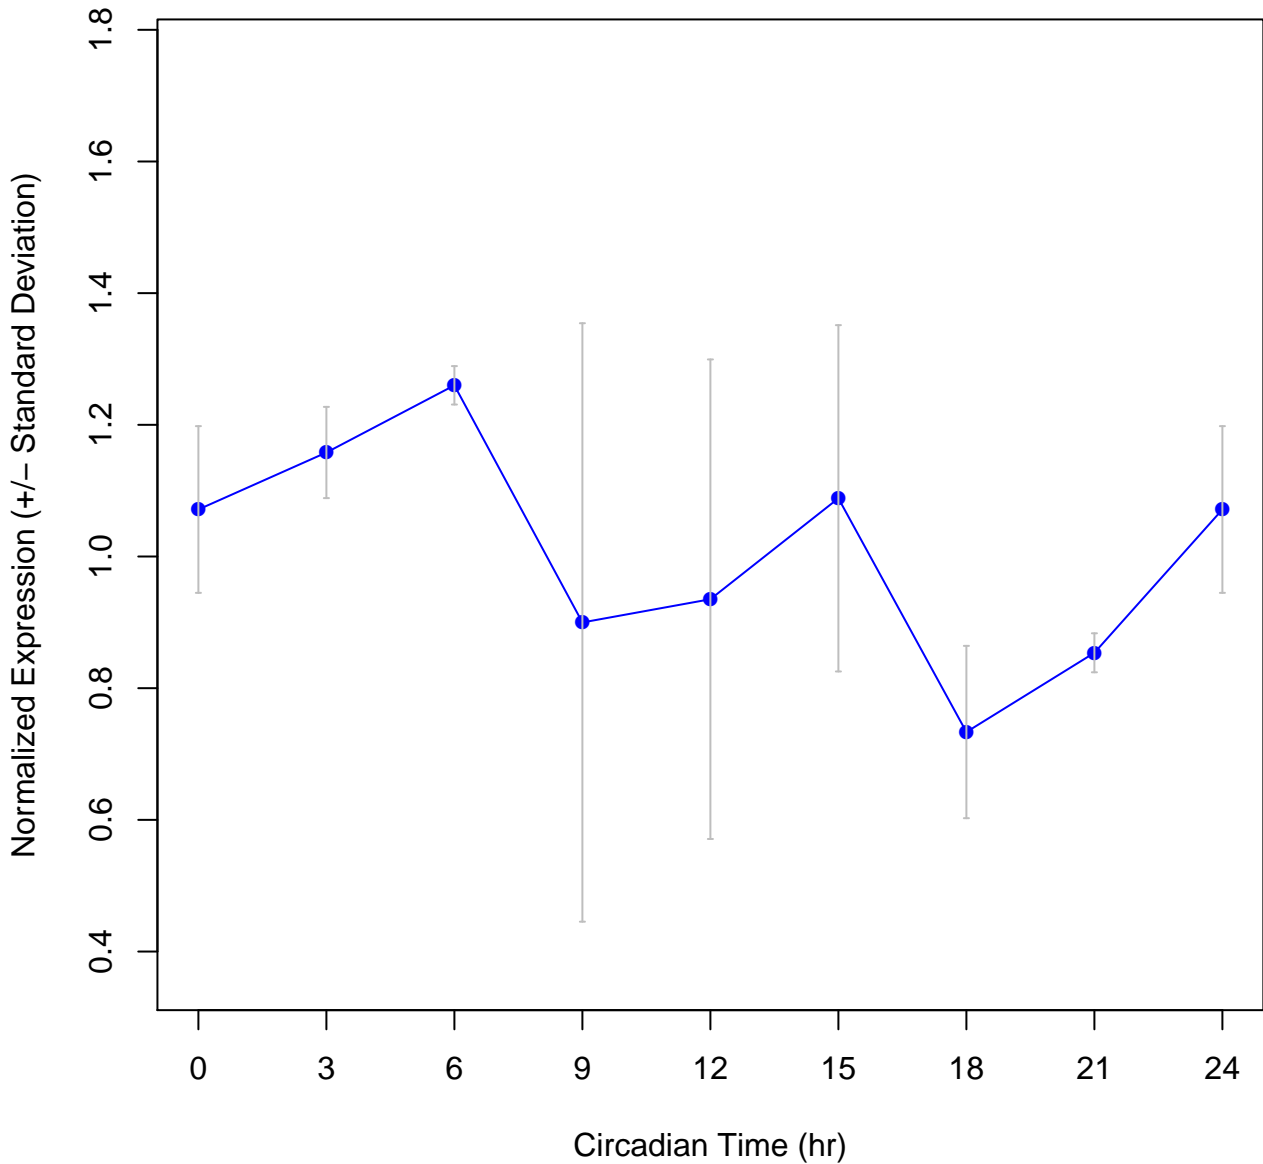

Supplement Figure 5 cdkn1a

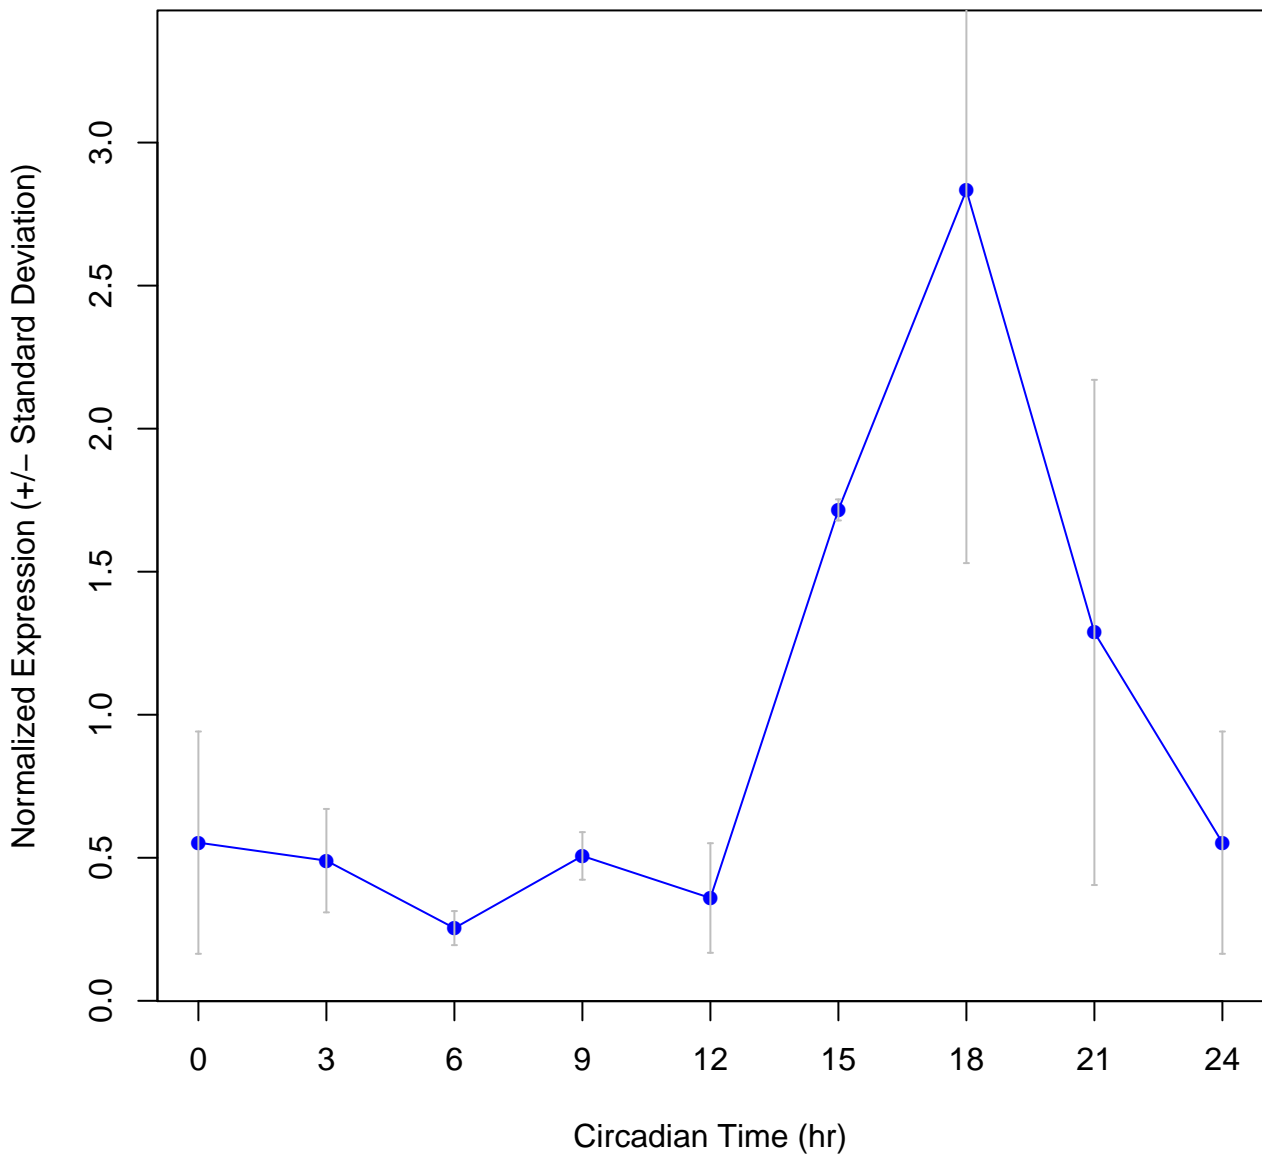



# Supplement Figure 5 chk1

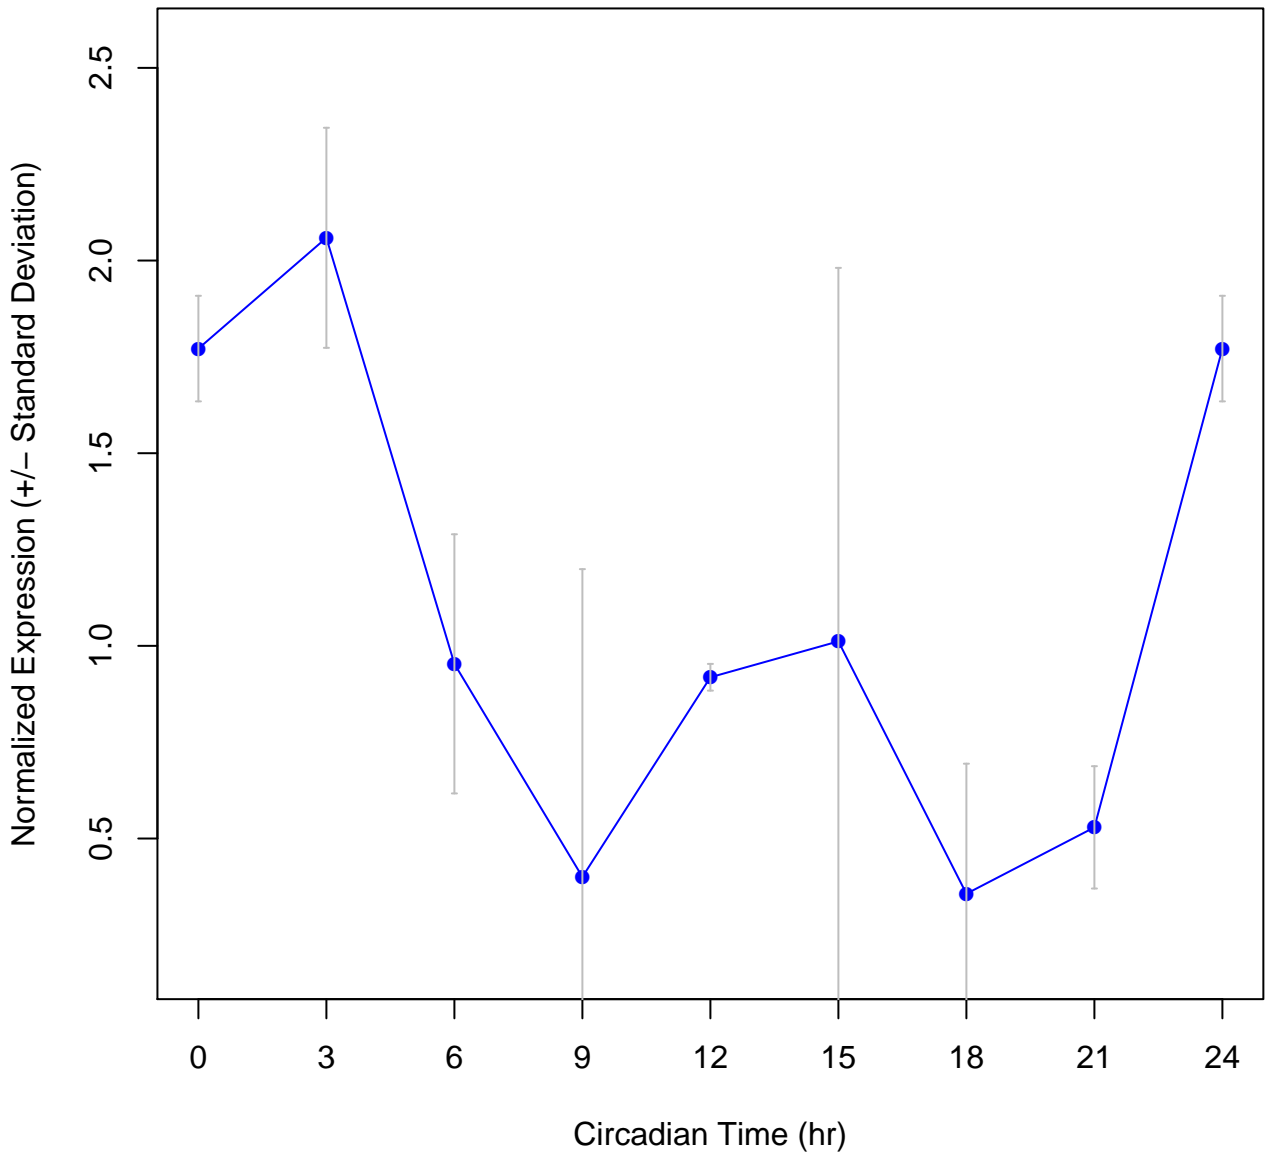

Supplement Figure 5 chrnb1

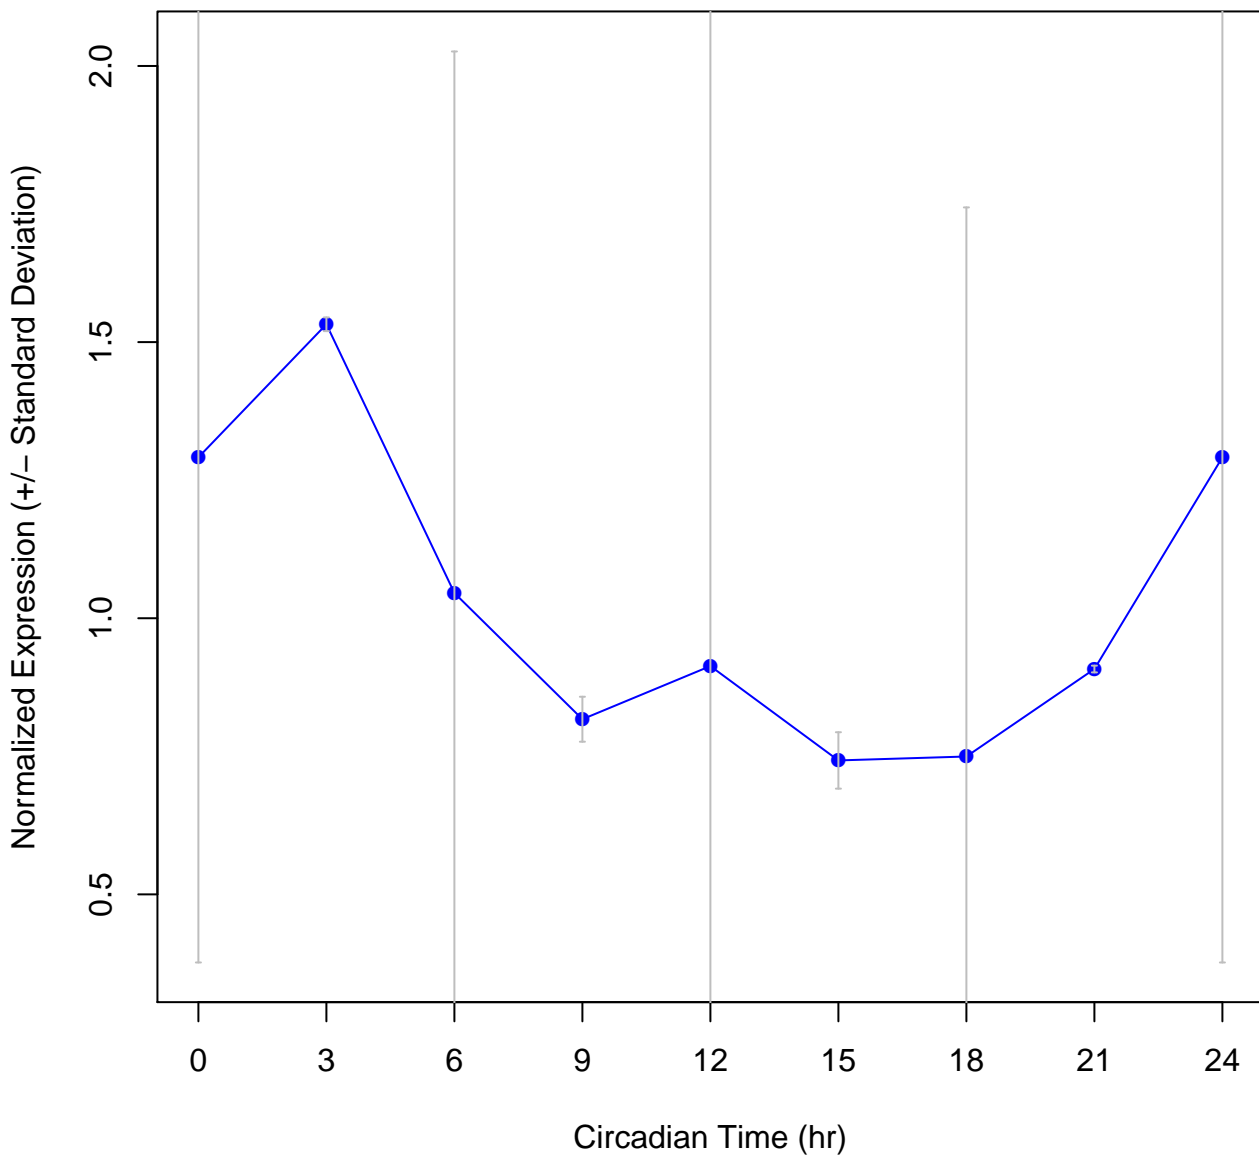

**Supplement Figure 5 ck1e**

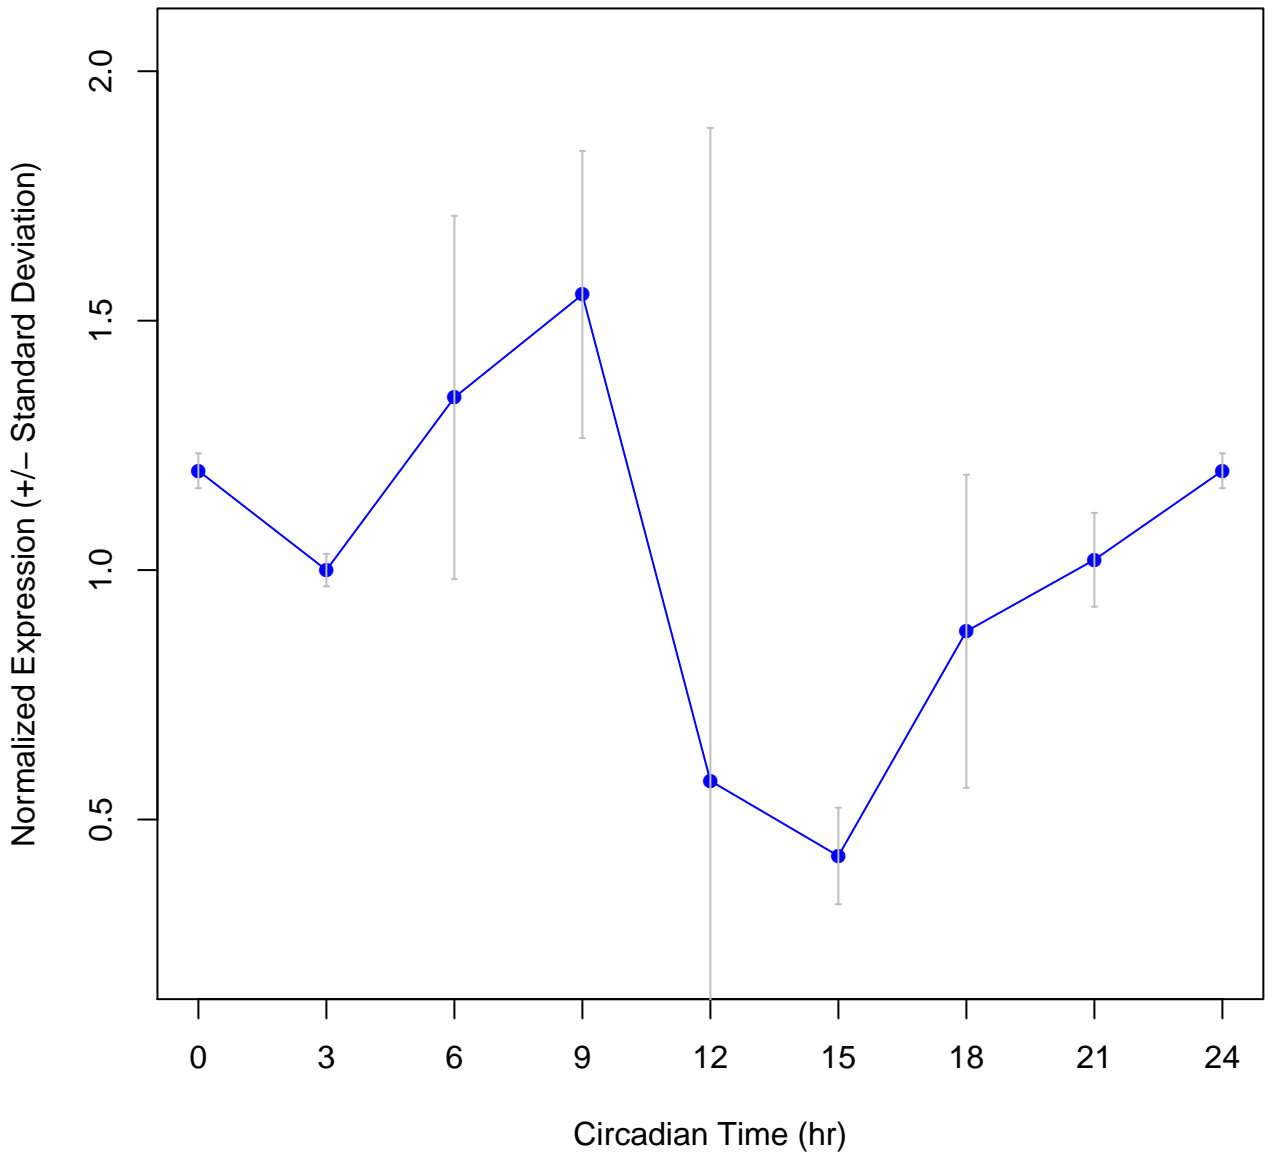

**Supplement Figure 5 ckm**

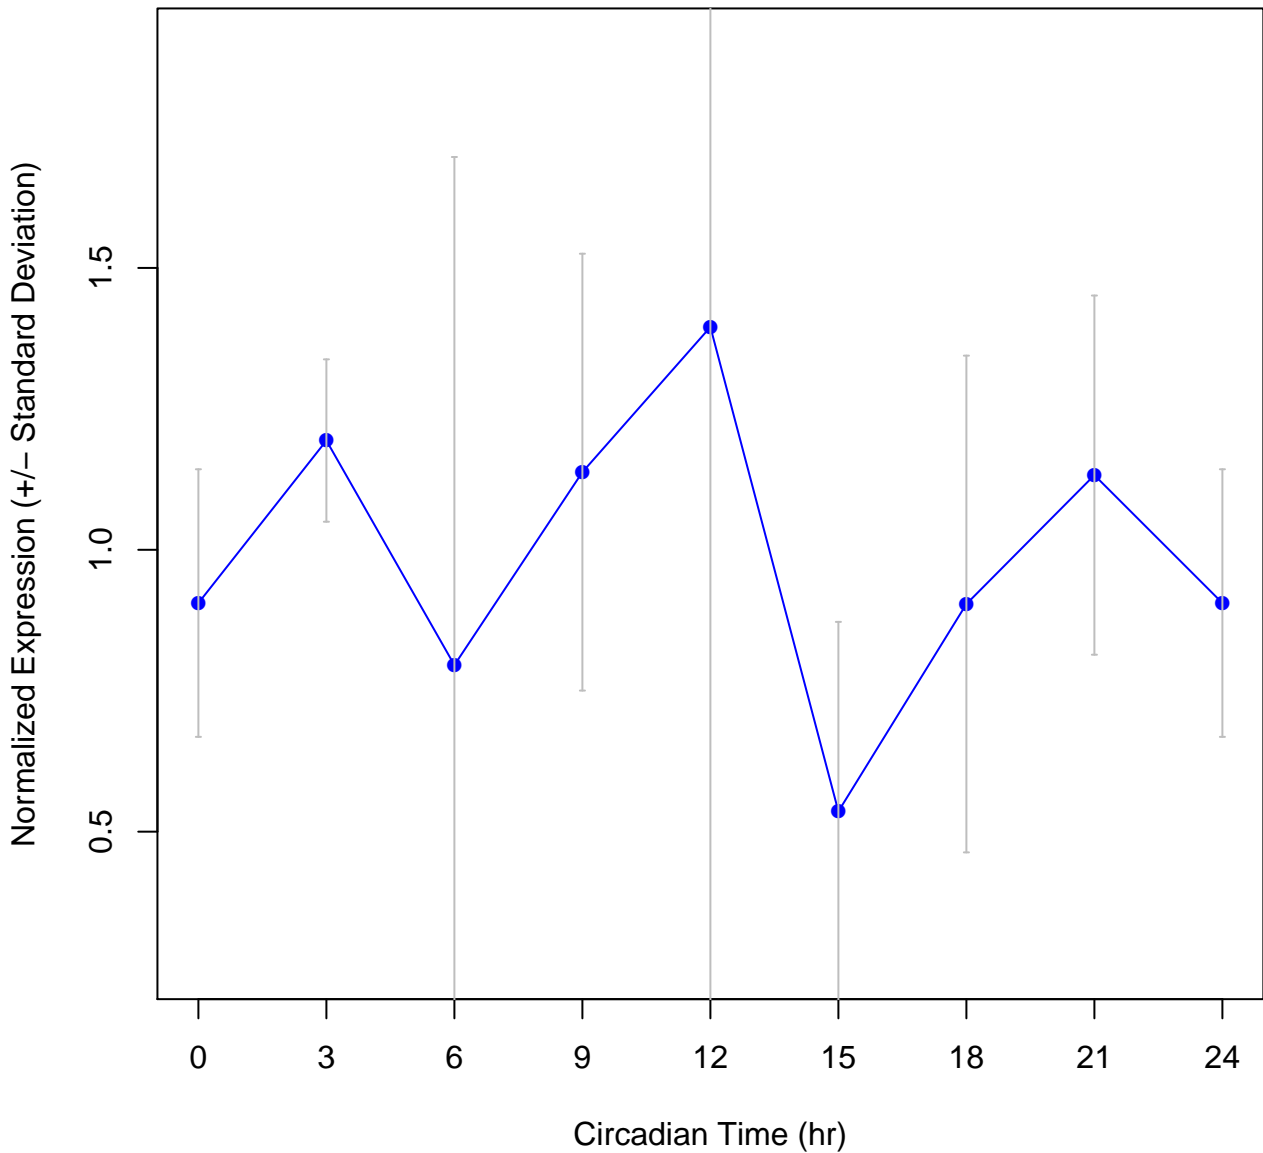

## Supplement Figure 5 cks2

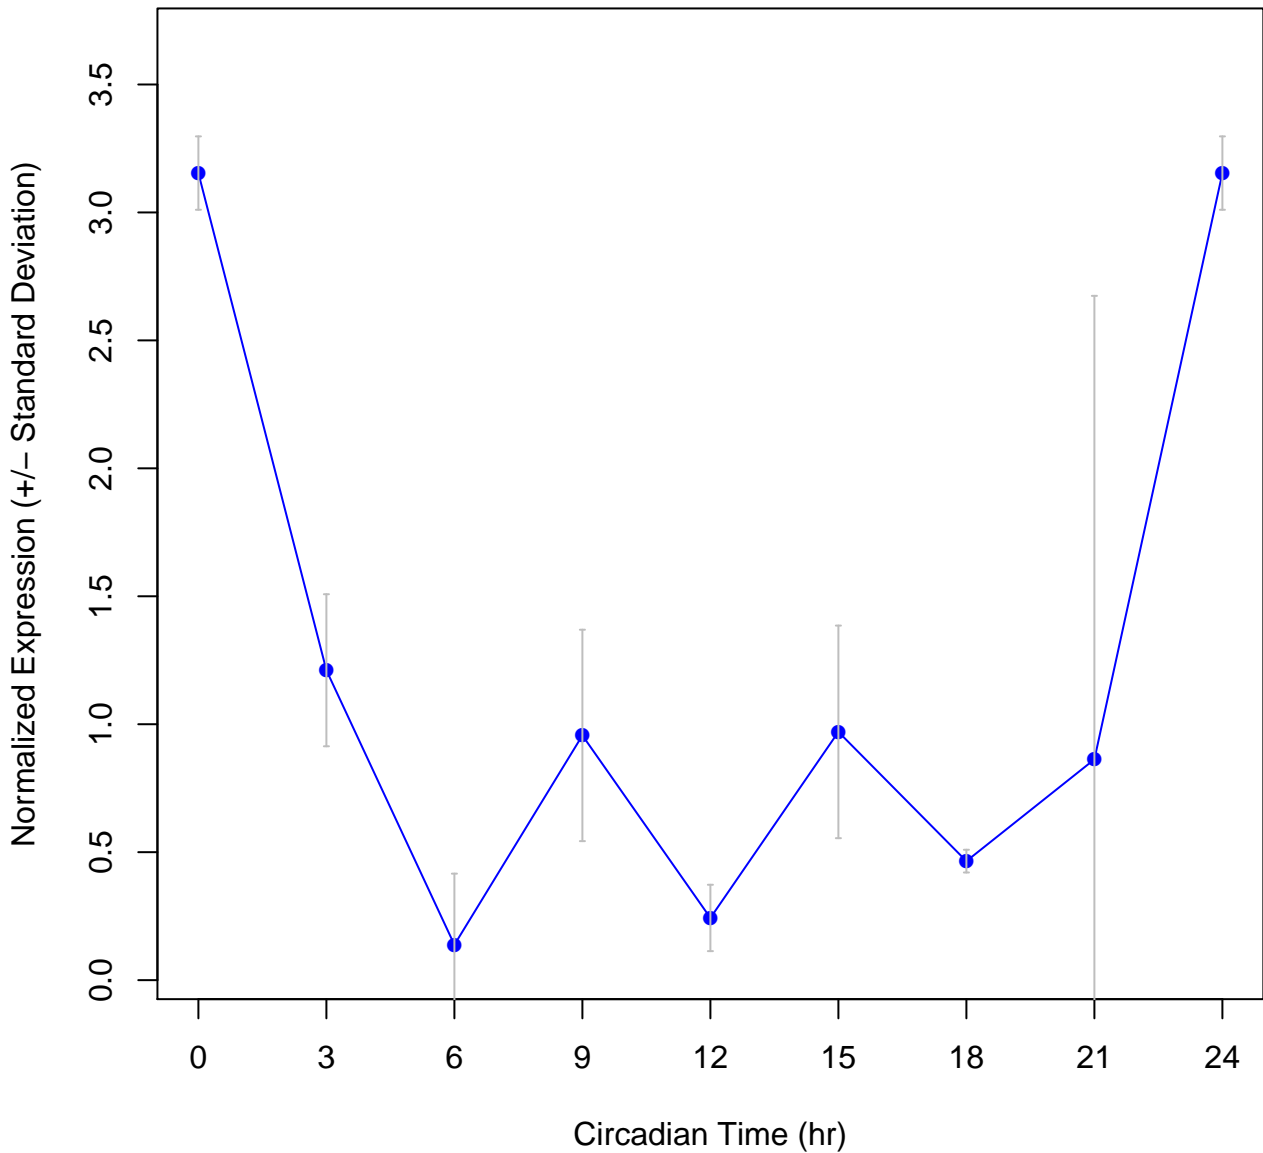

## Supplement Figure 5 clocka

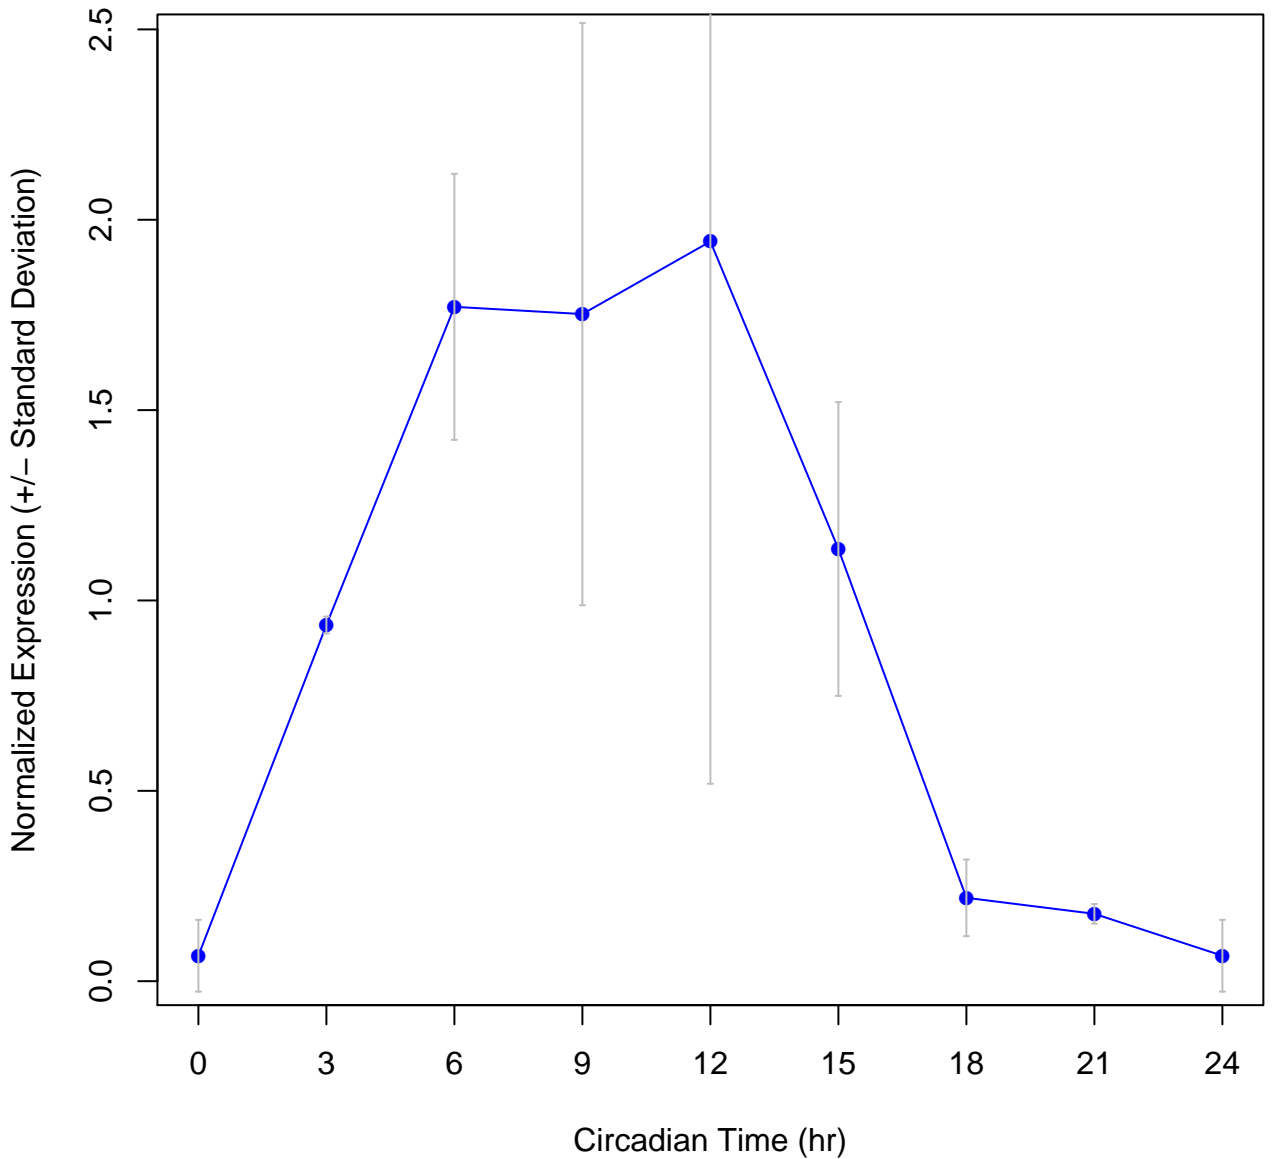

## Supplement Figure 5 clockb

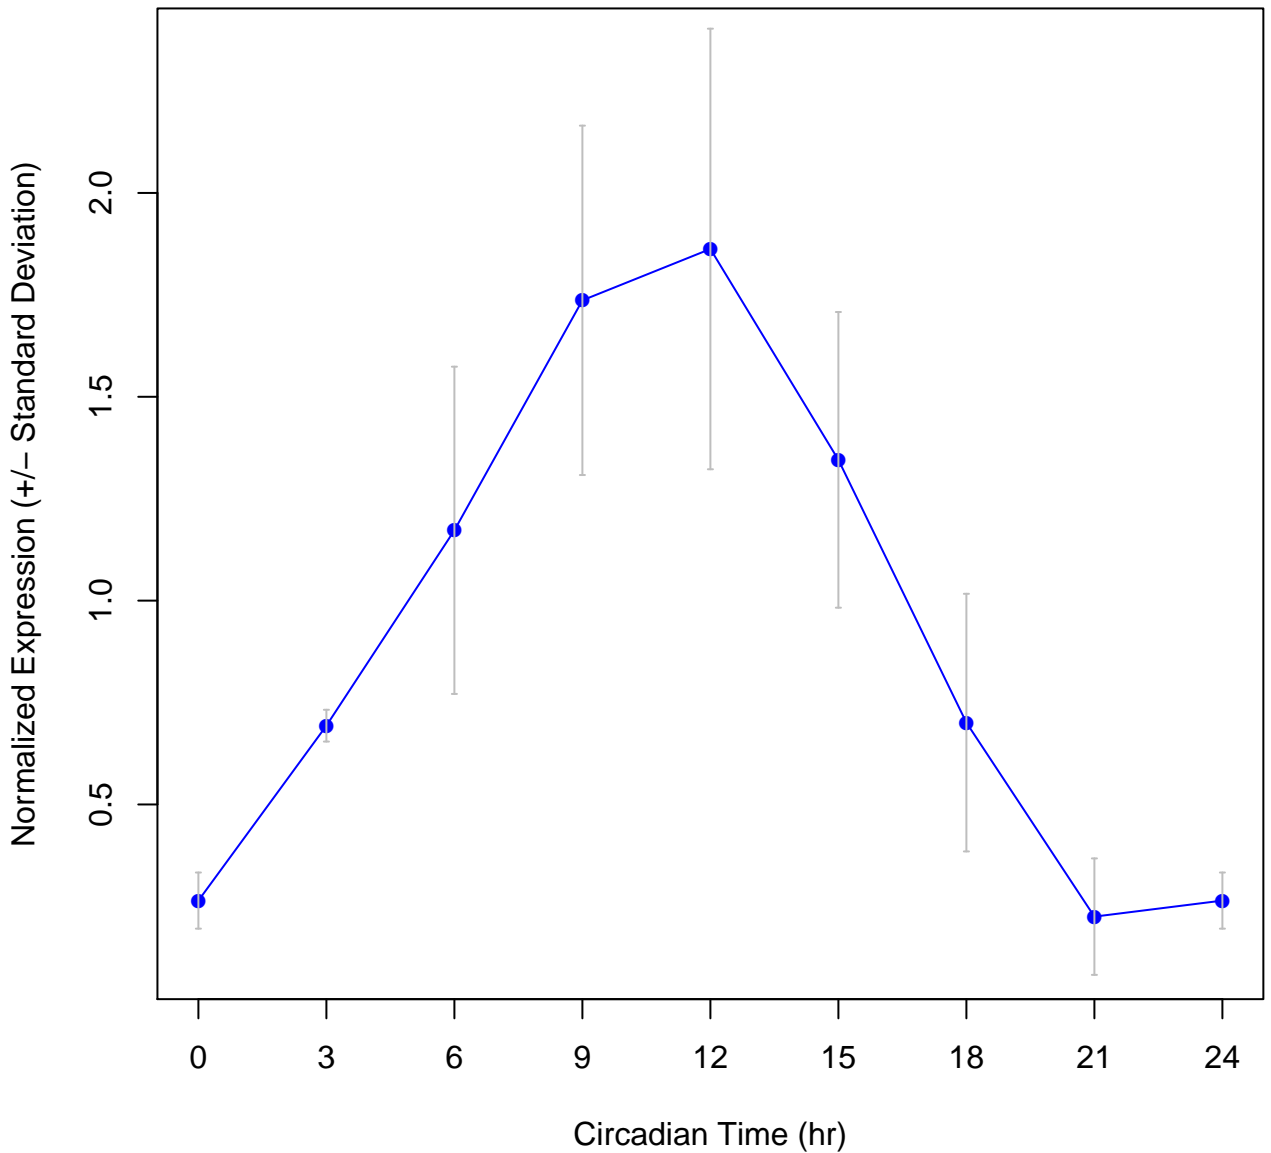

Supplement Figure 5 col9a1

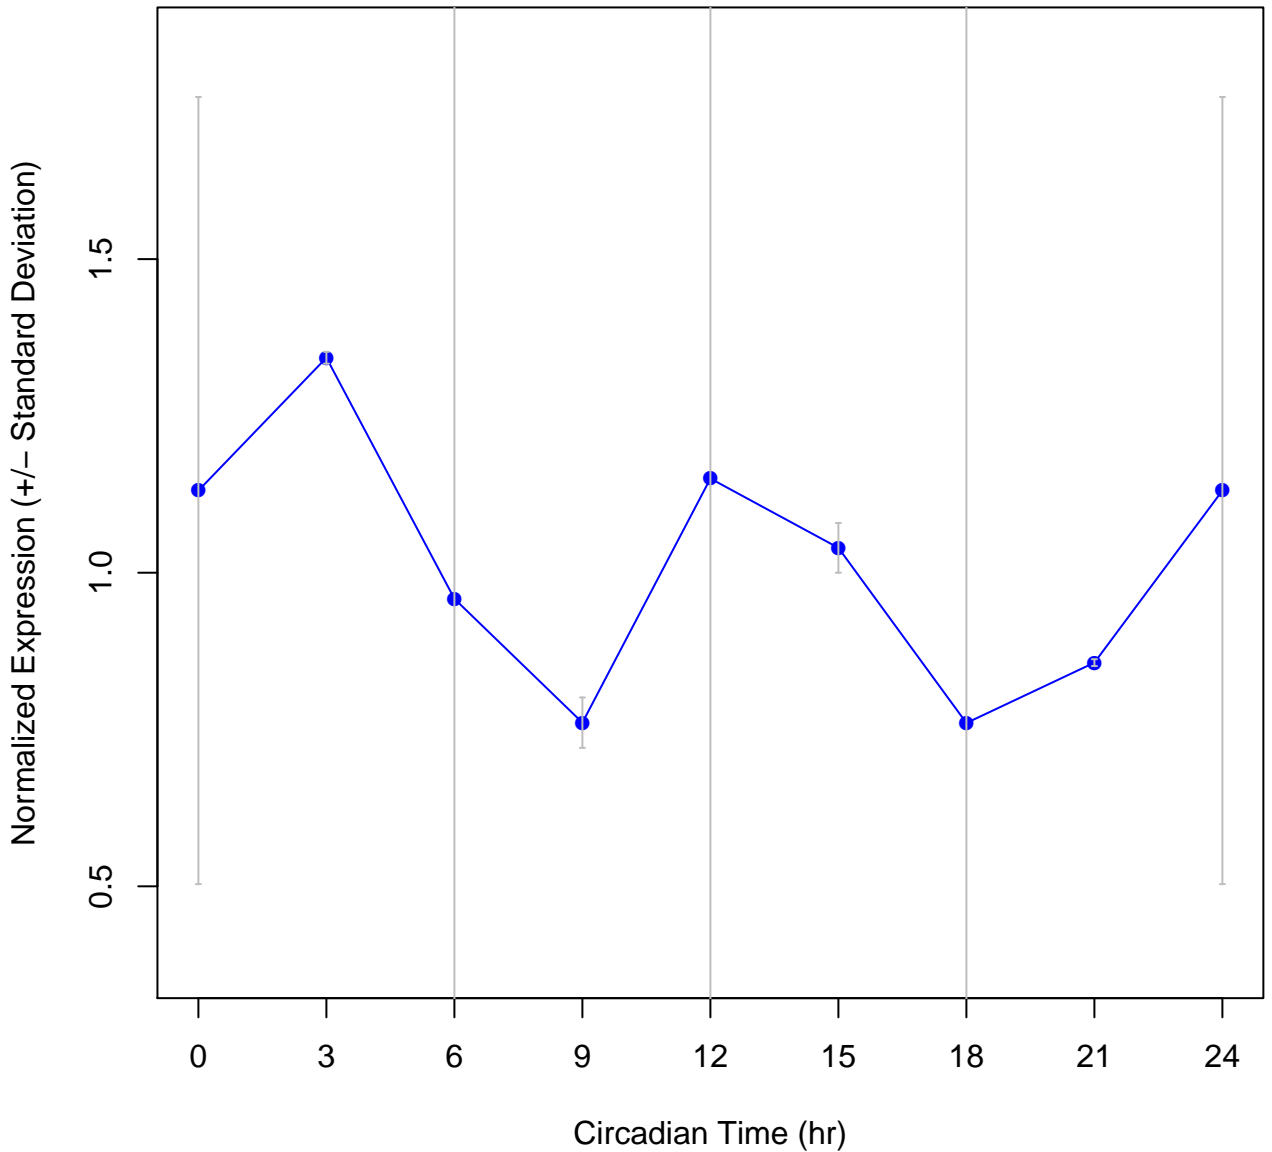



## Supplement Figure 5 cpd photolyase

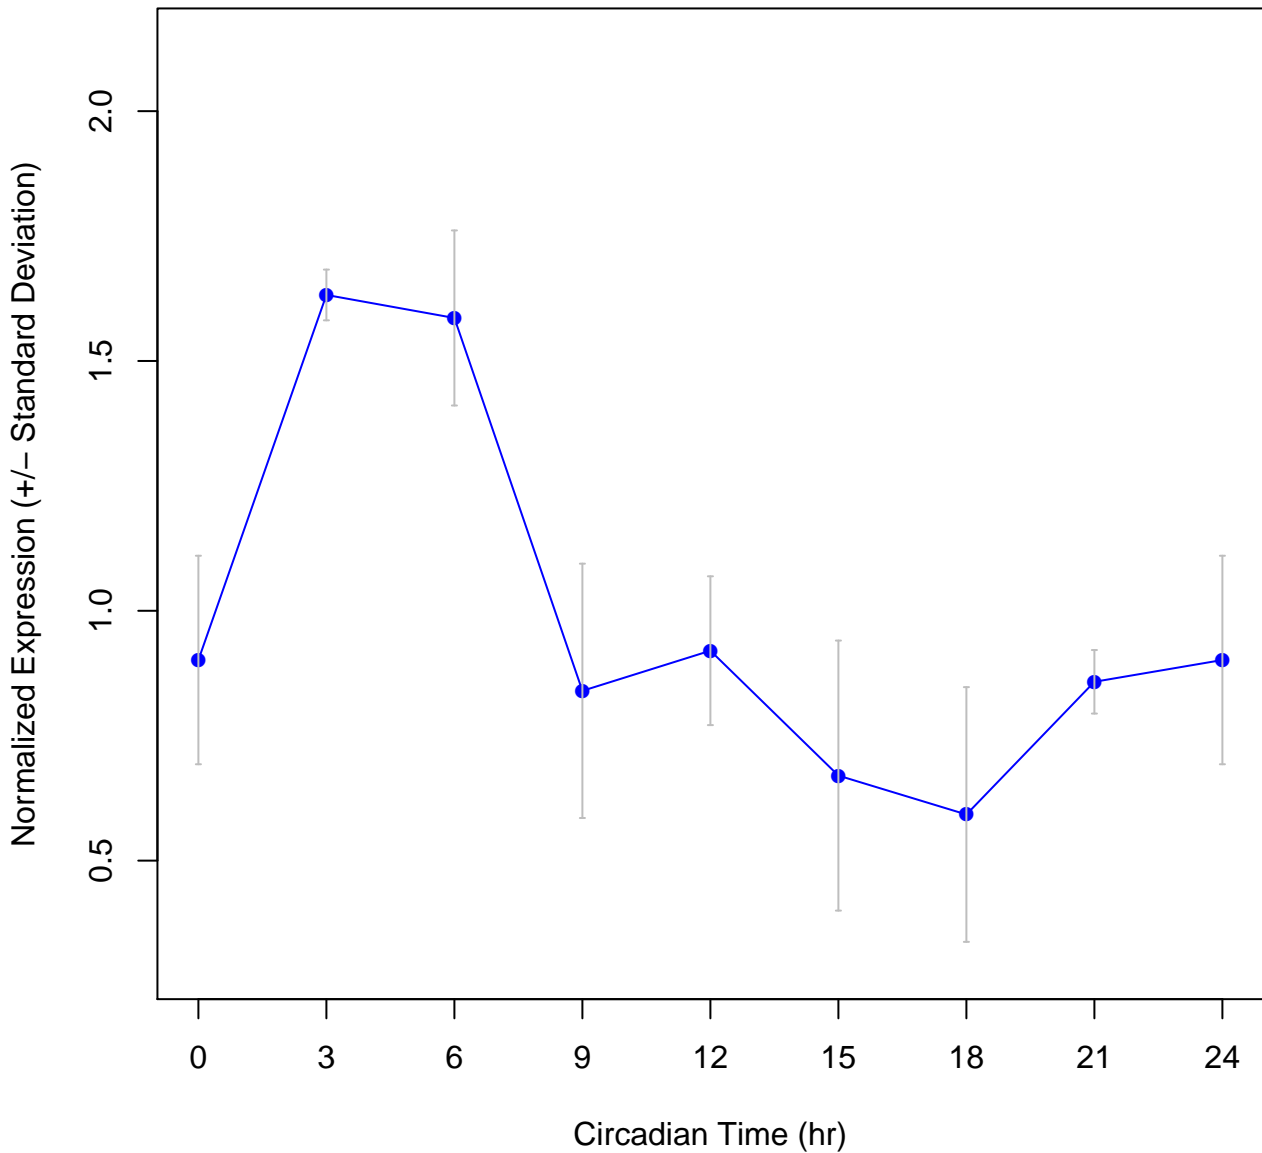

## Supplement Figure 5 creb5

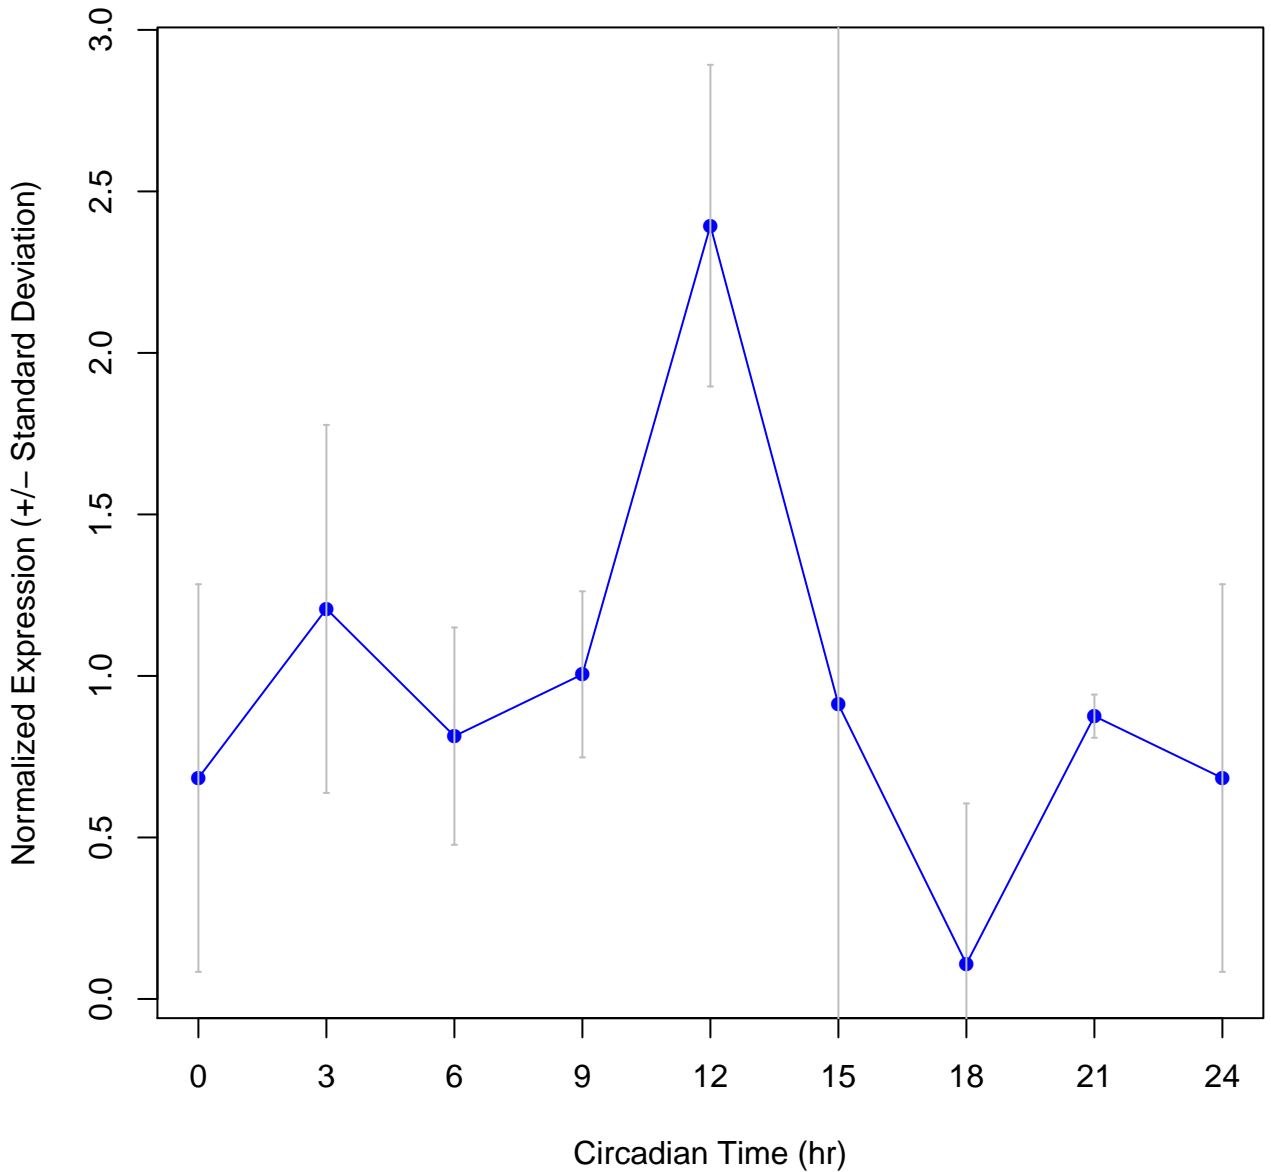

## Supplement Figure 5 crtc2

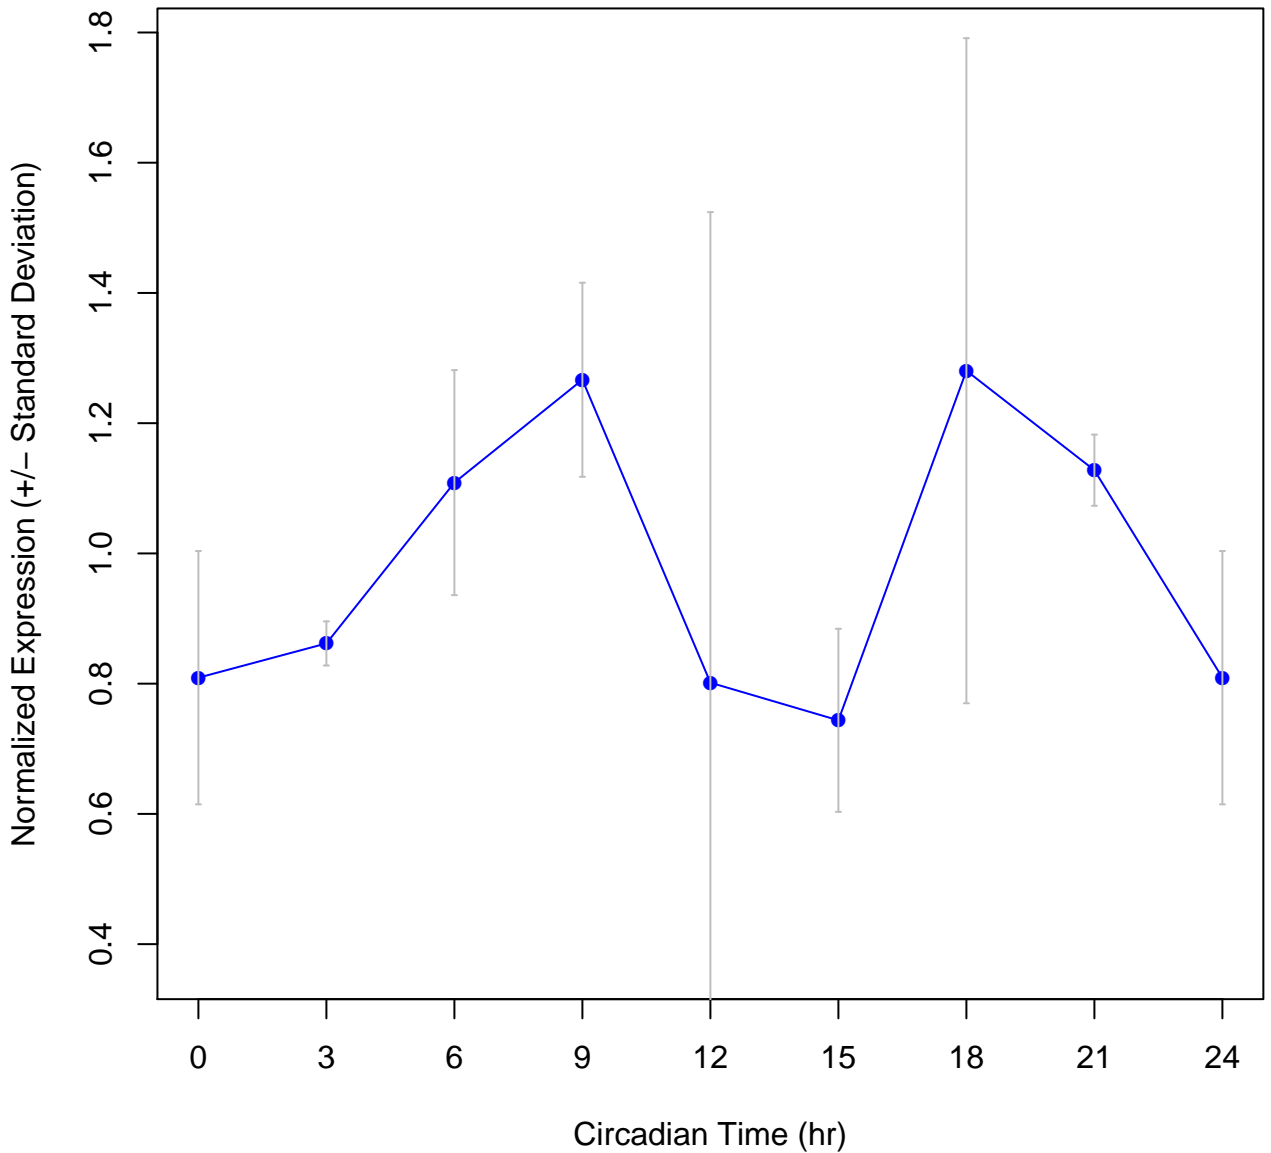

Supplement Figure 5 cry1

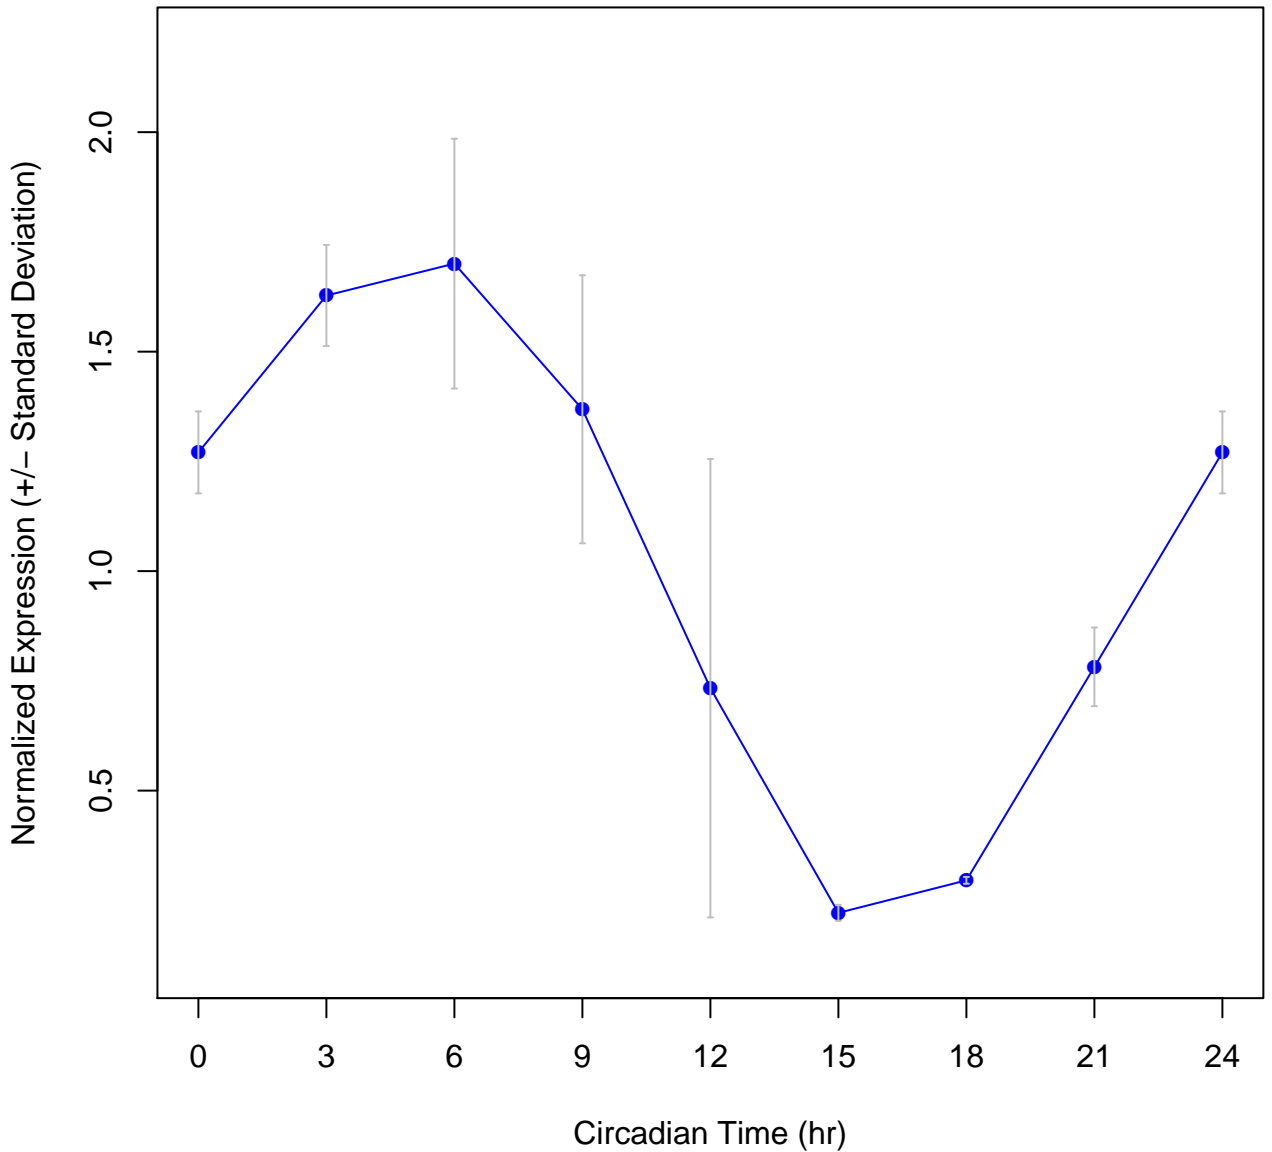

Supplement Figure 5 cry2

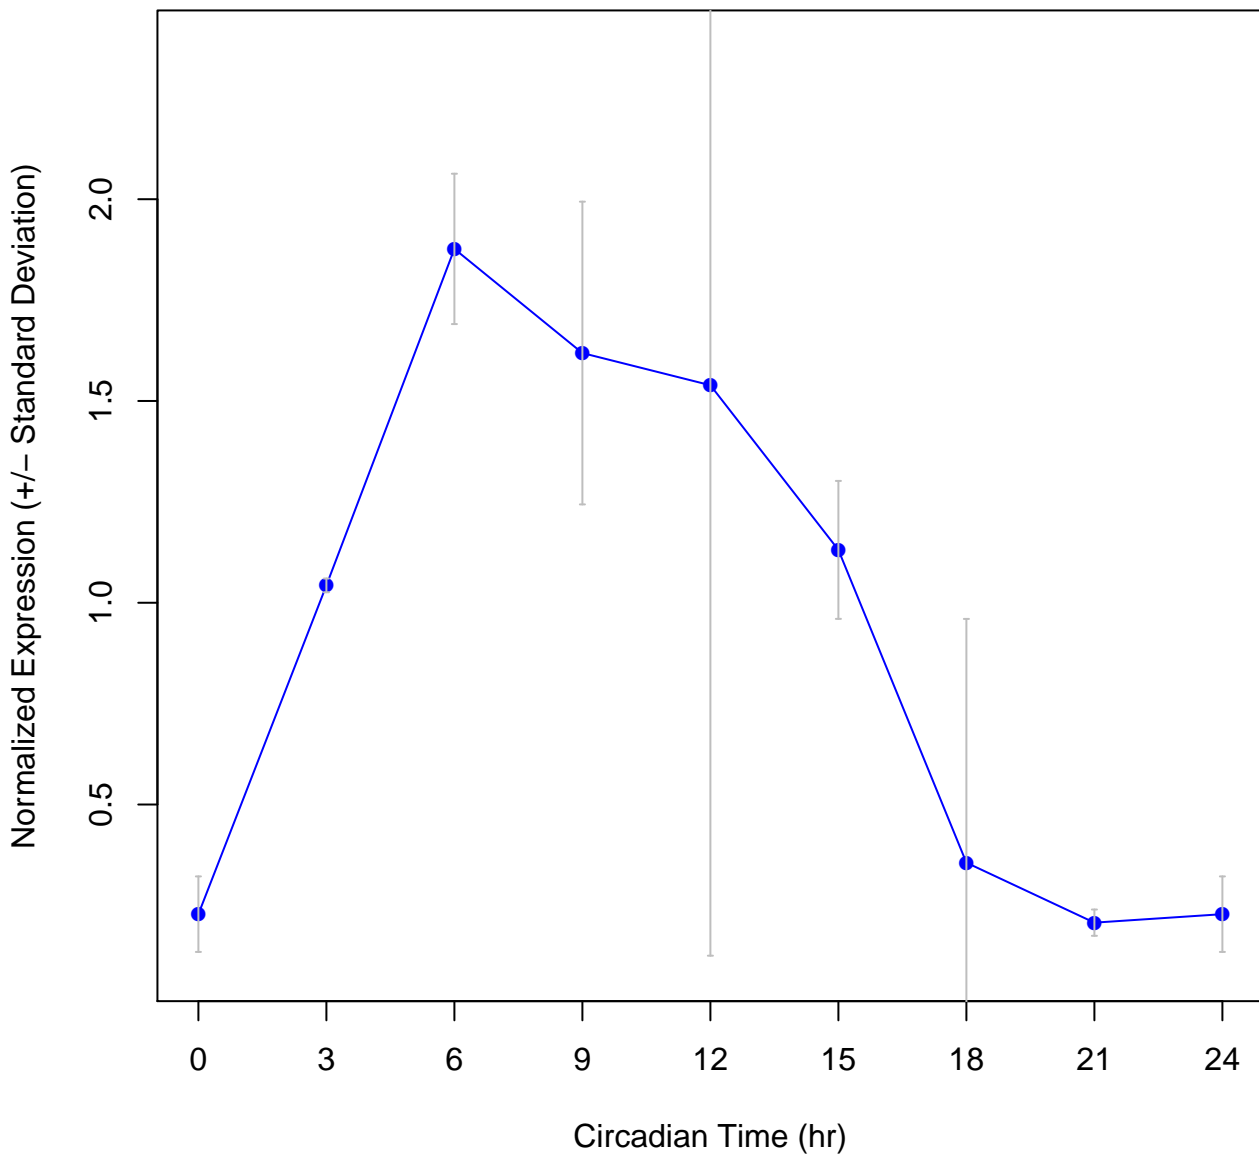

Supplement Figure 5 cry3

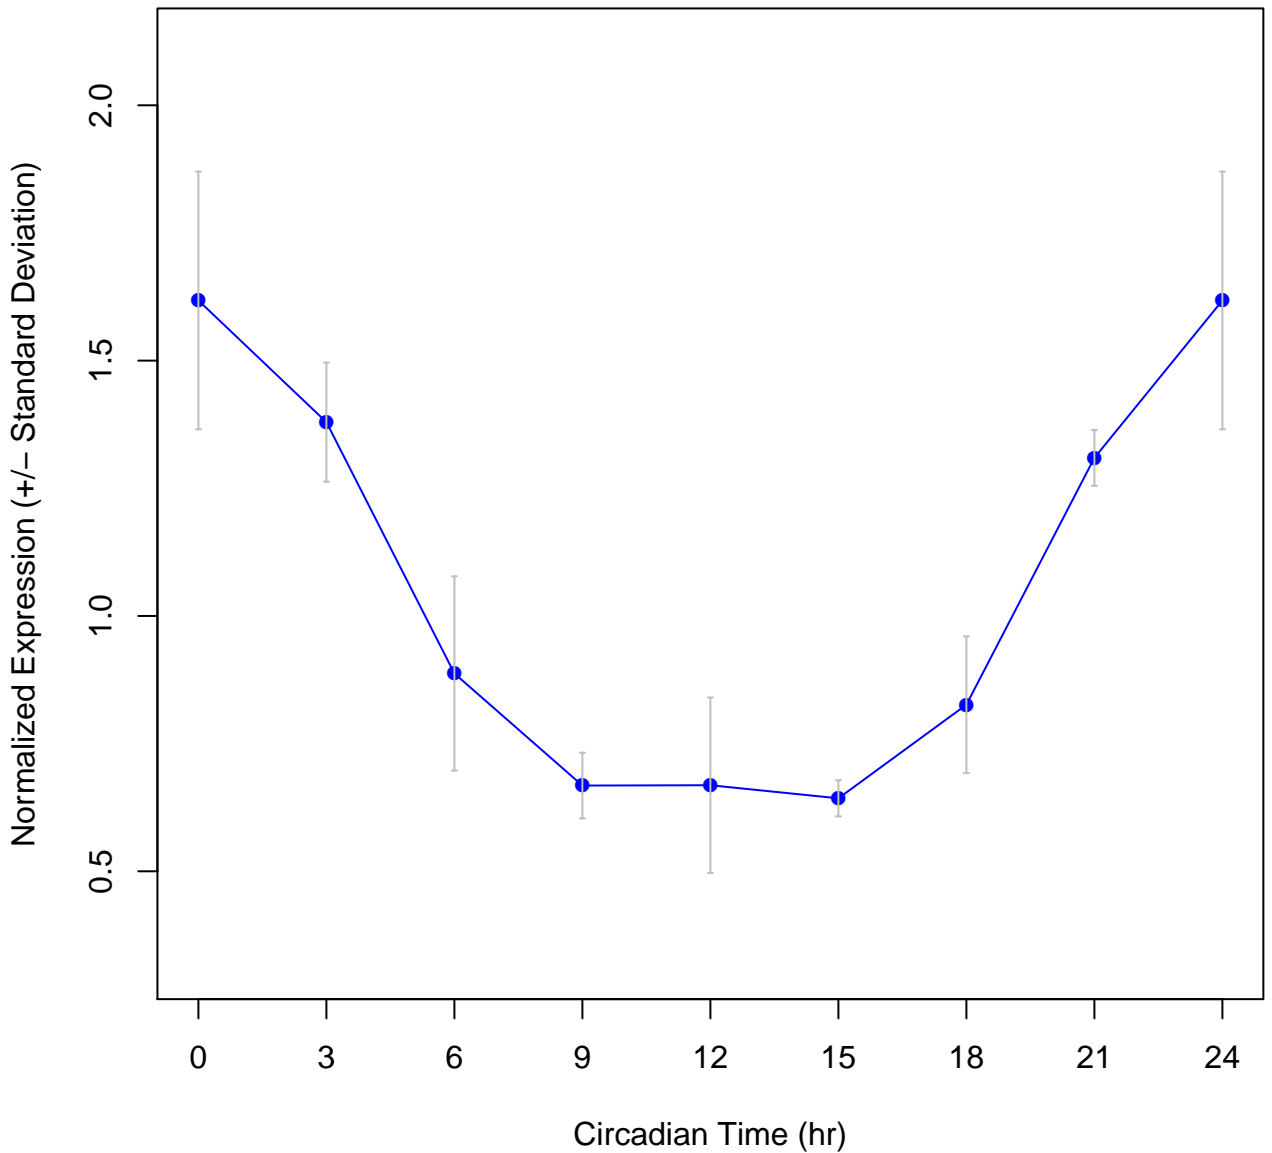

Supplement Figure 5 *ctbp2*

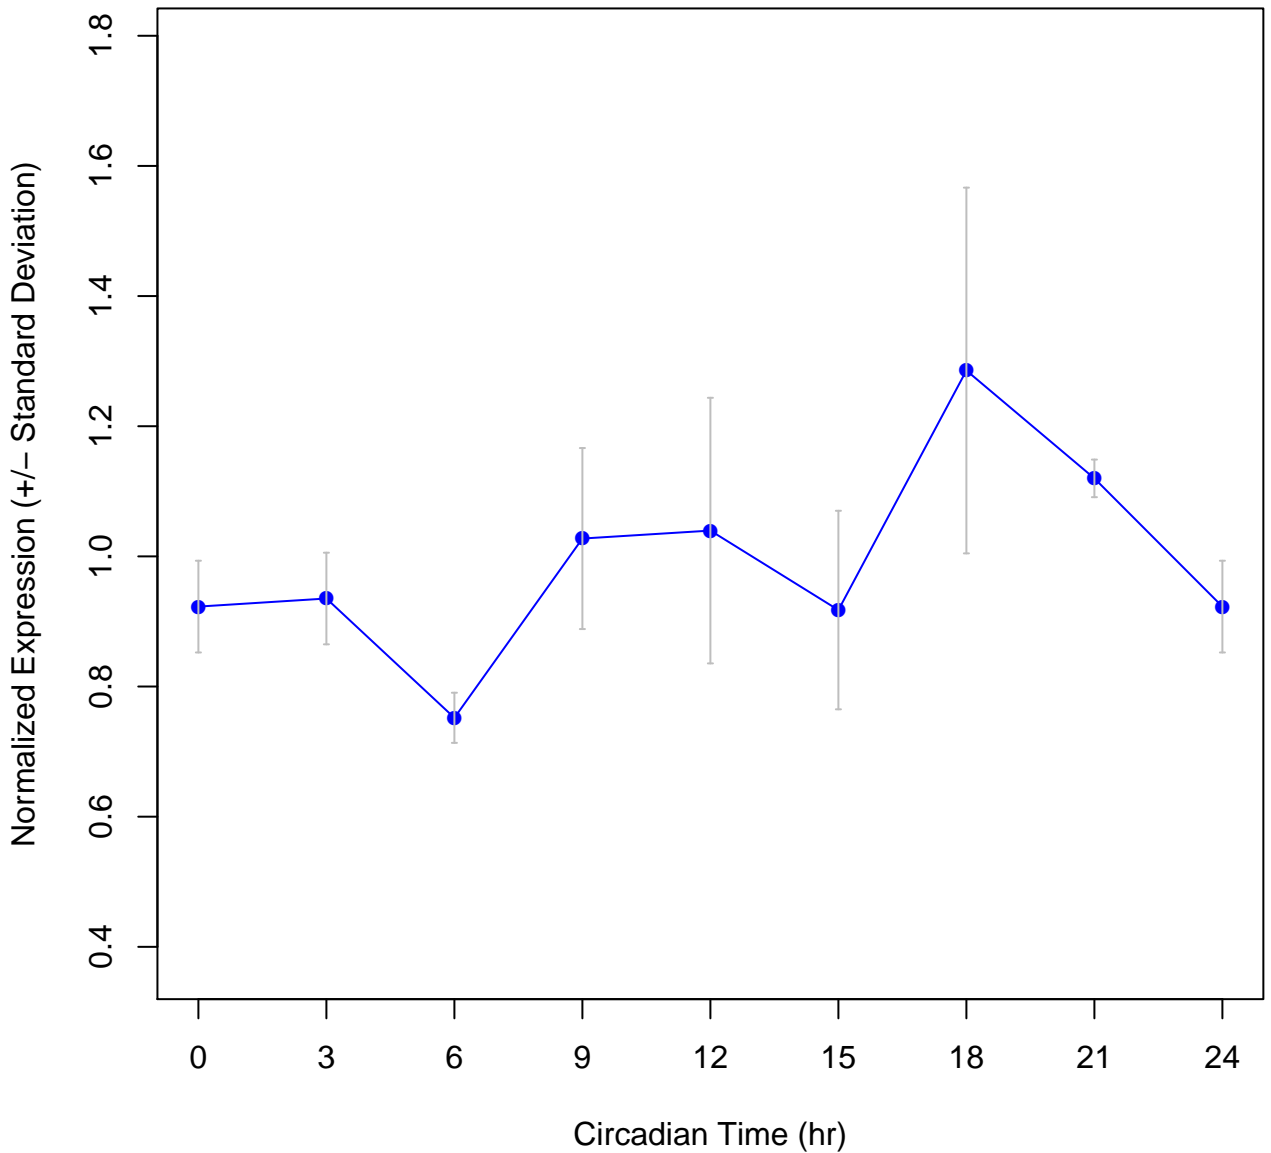

Supplement Figure 5 cul1

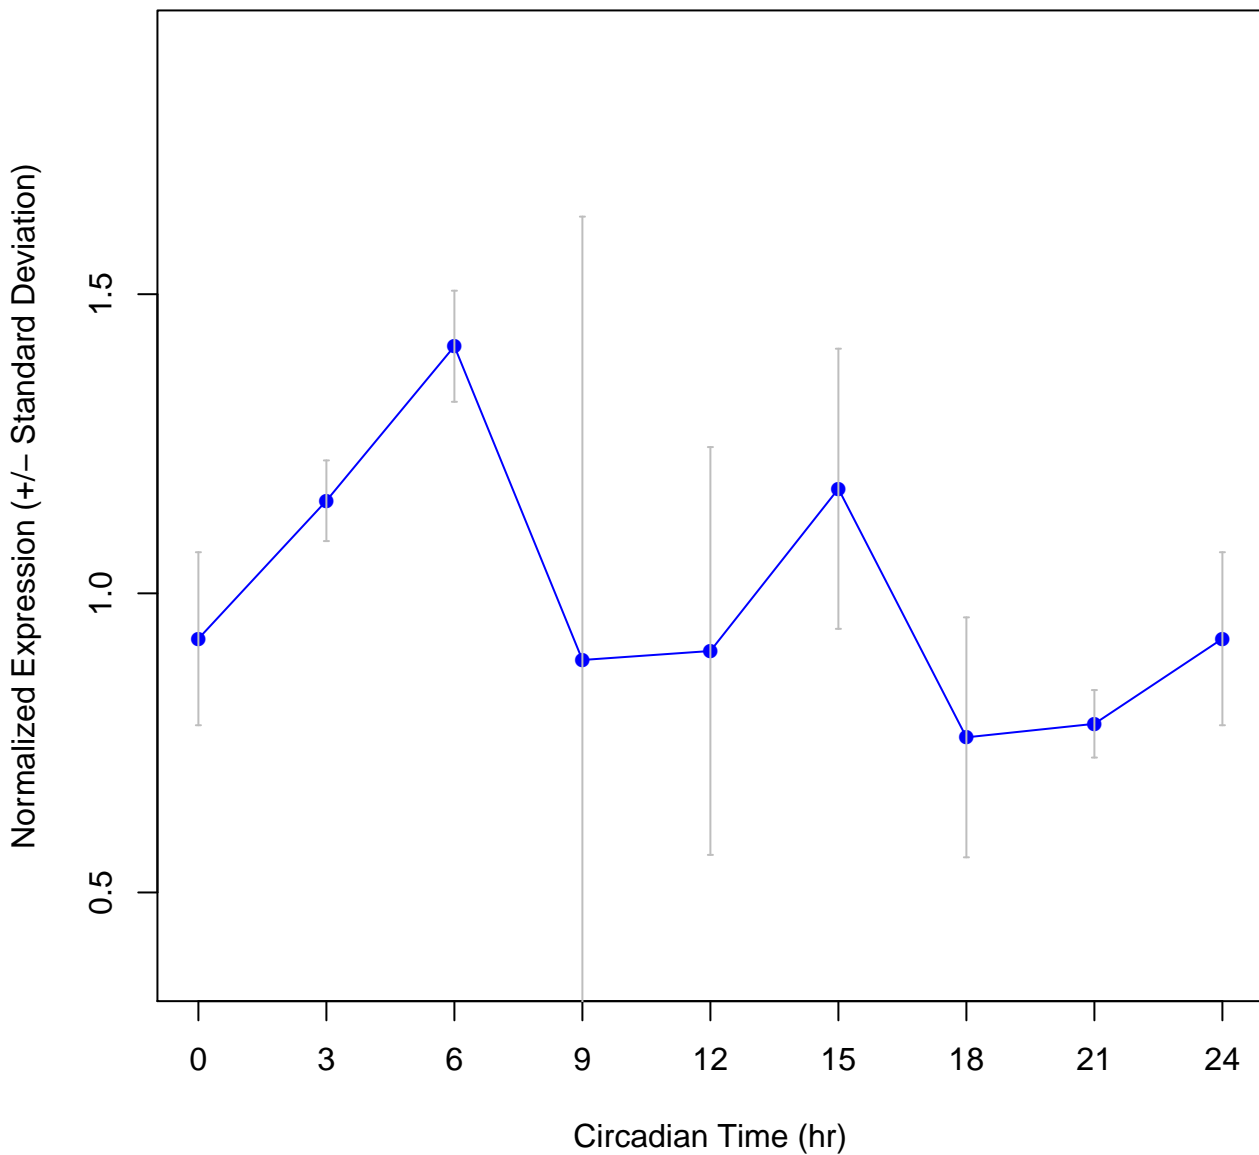



Supplement Figure 5 cyp1

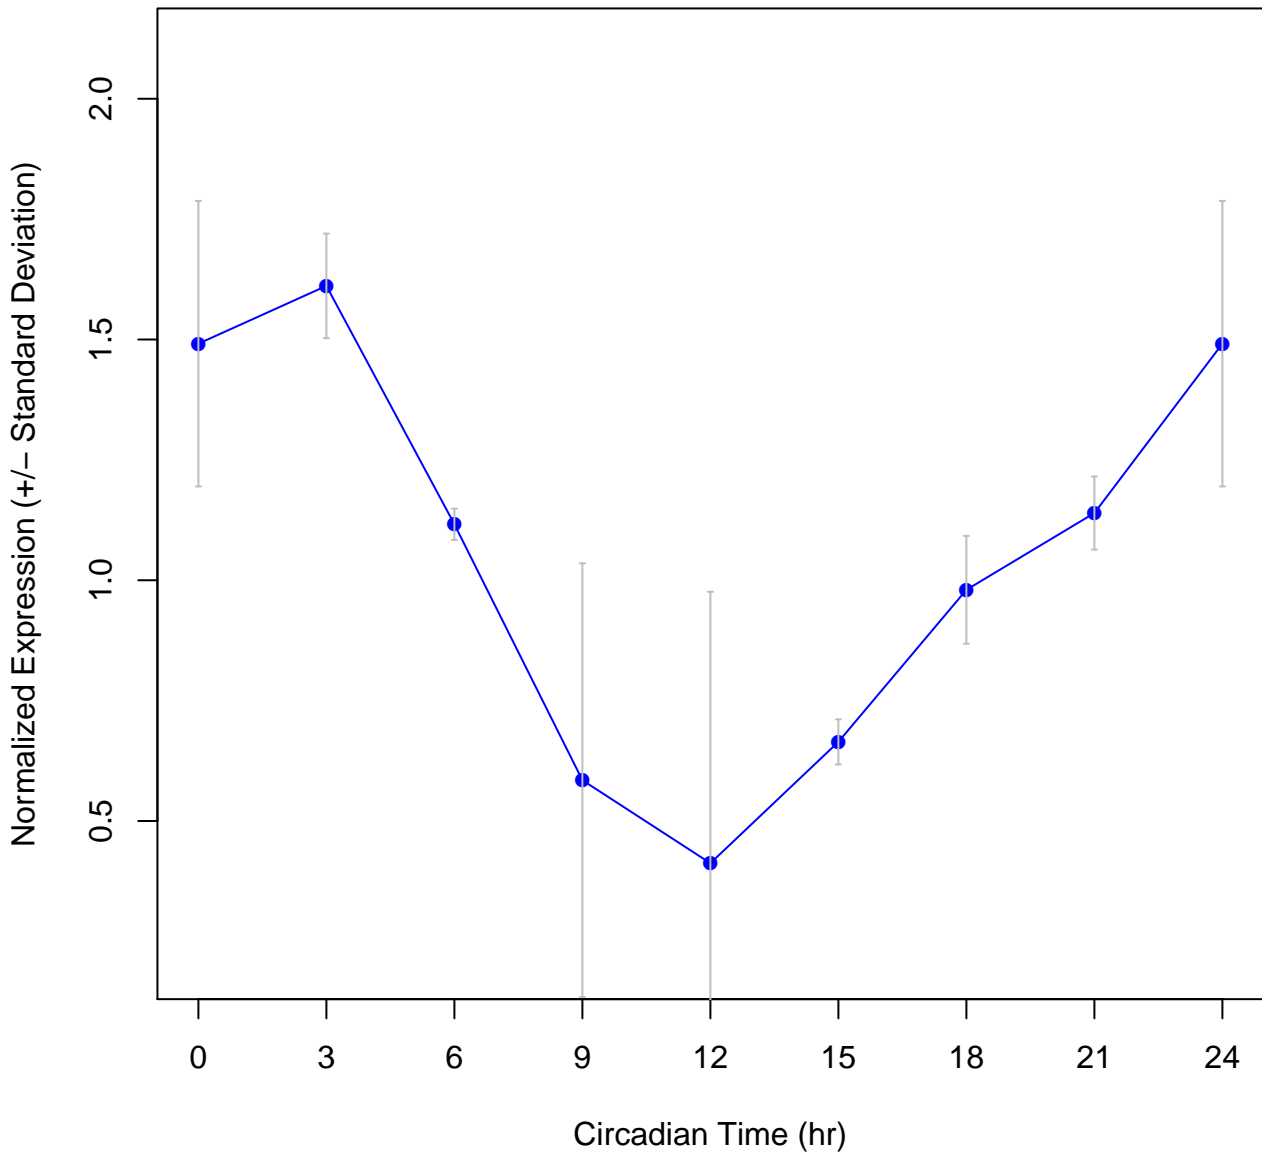

Supplement Figure 5 dct

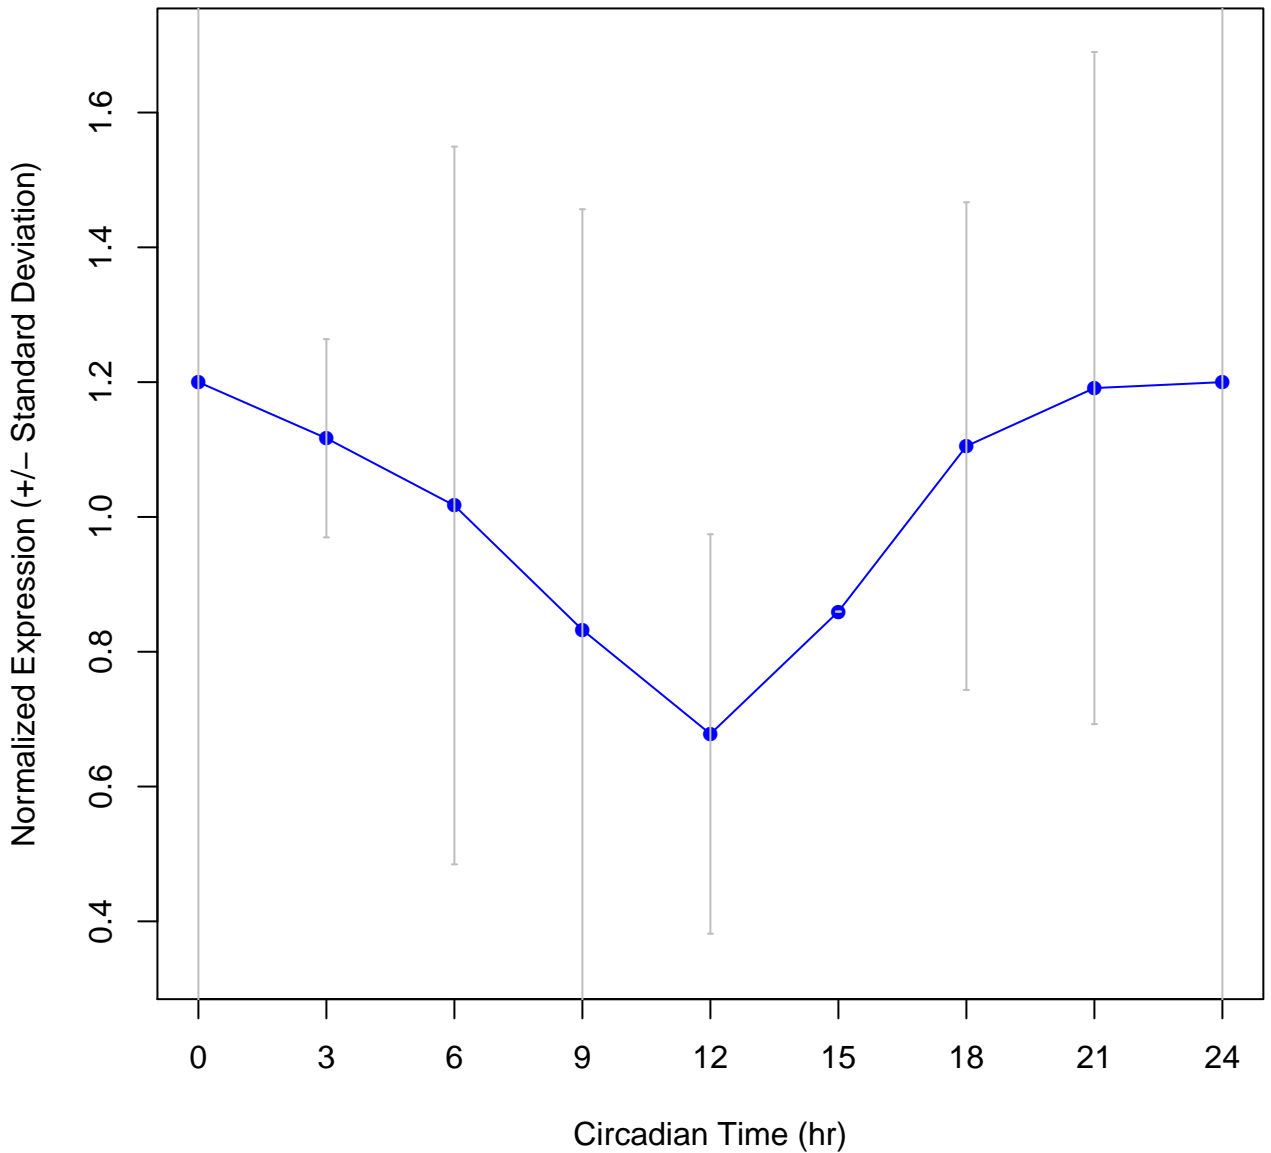

Supplement Figure 5 ddb1

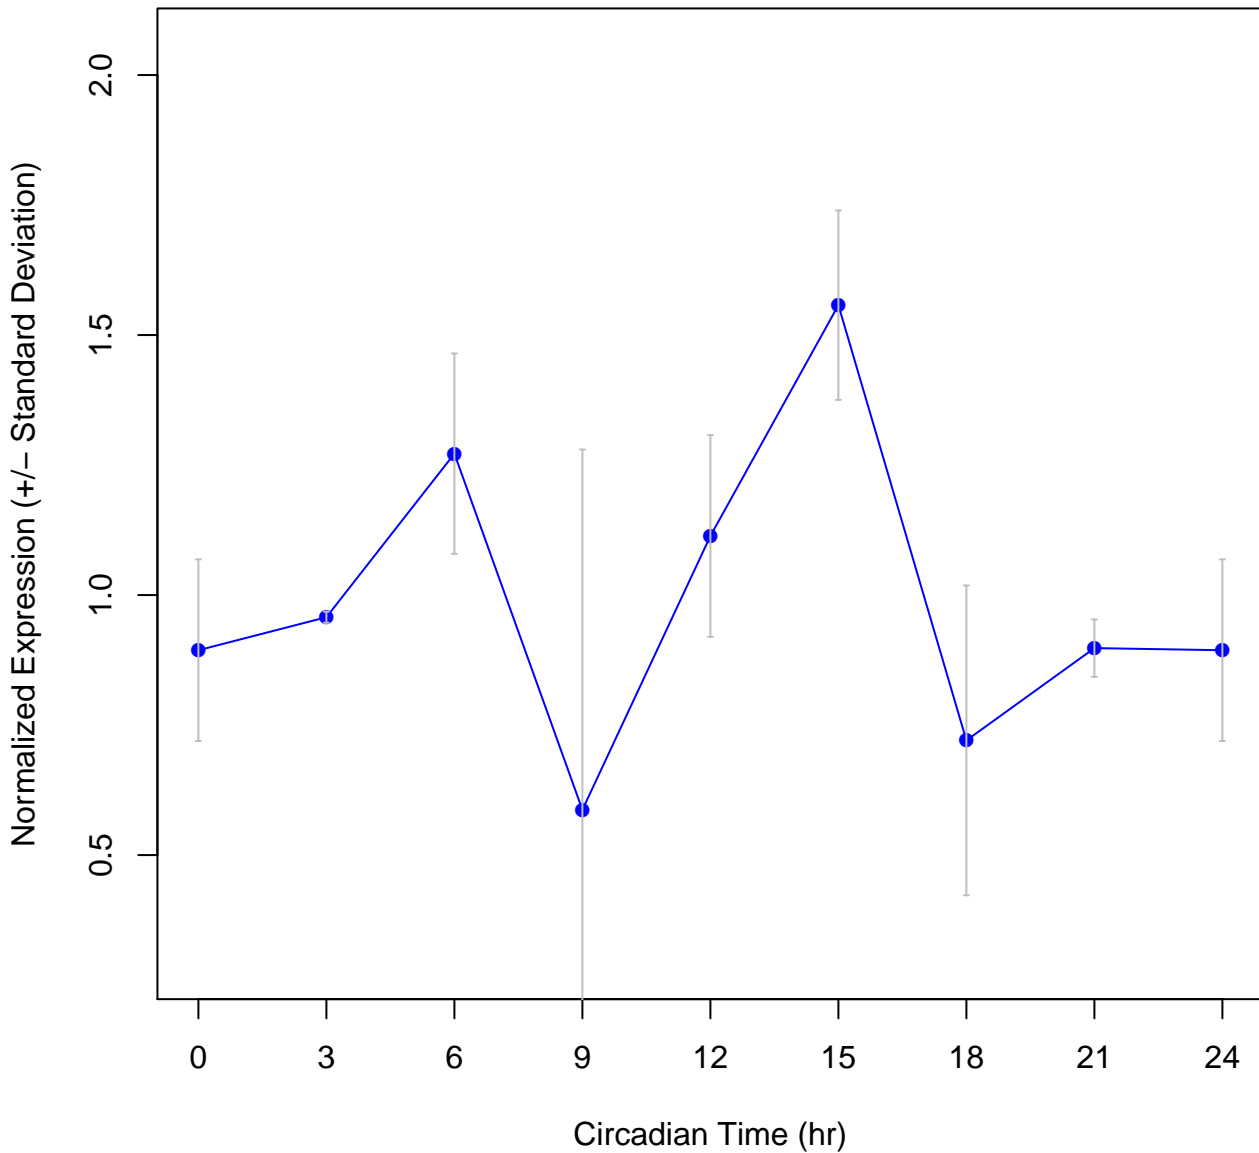

Supplement Figure 5 ddb2

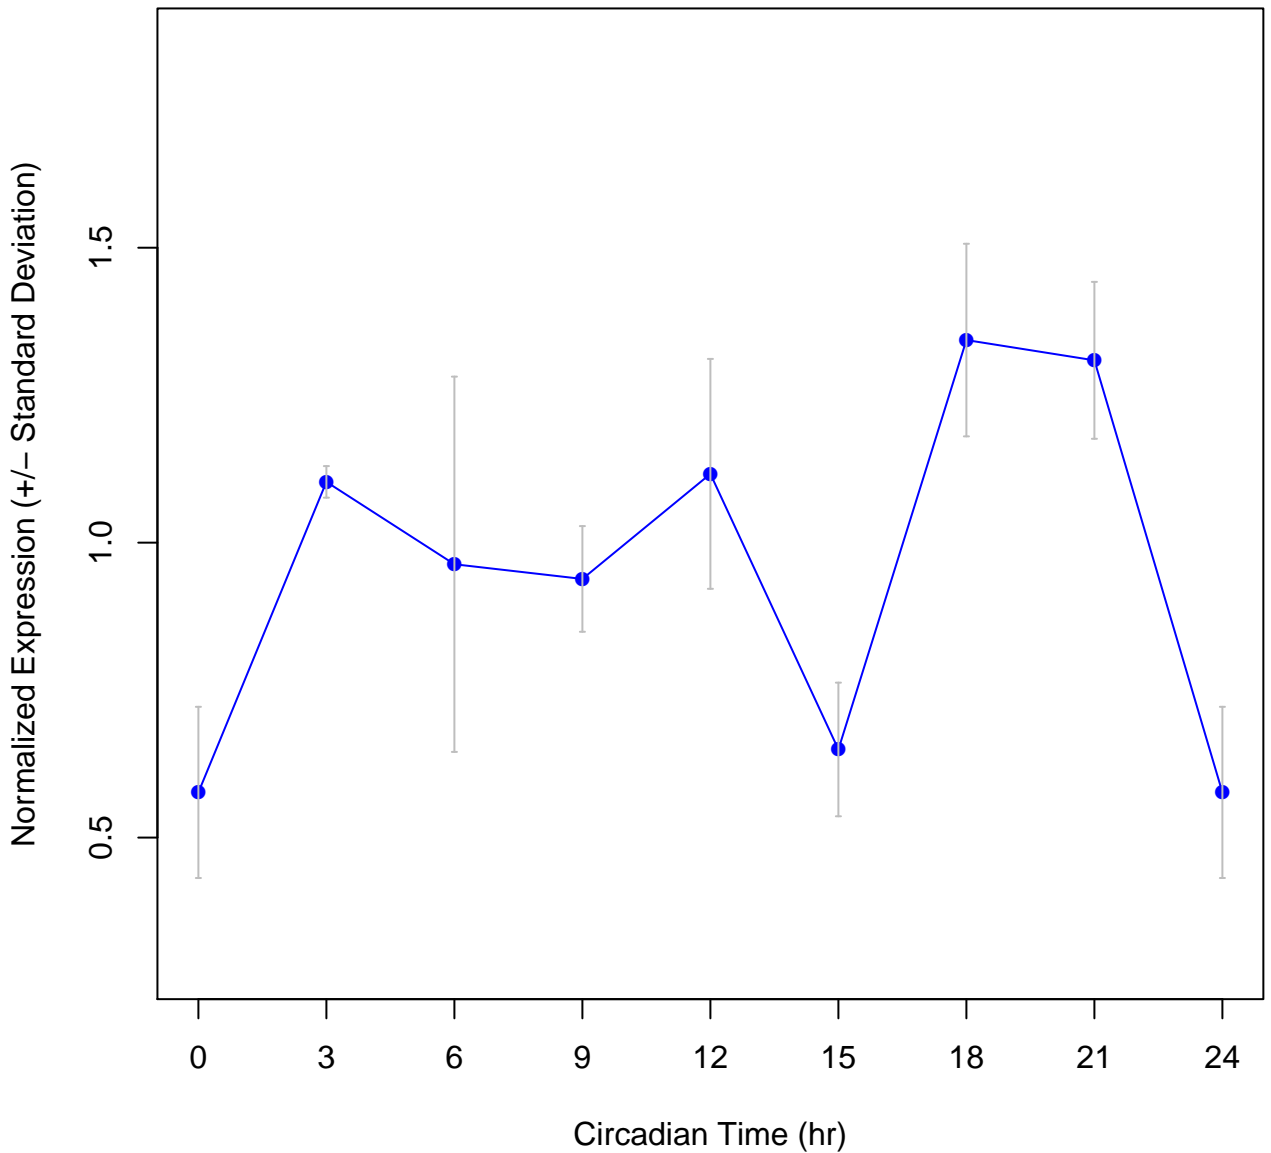

## Supplement Figure 5 dio3

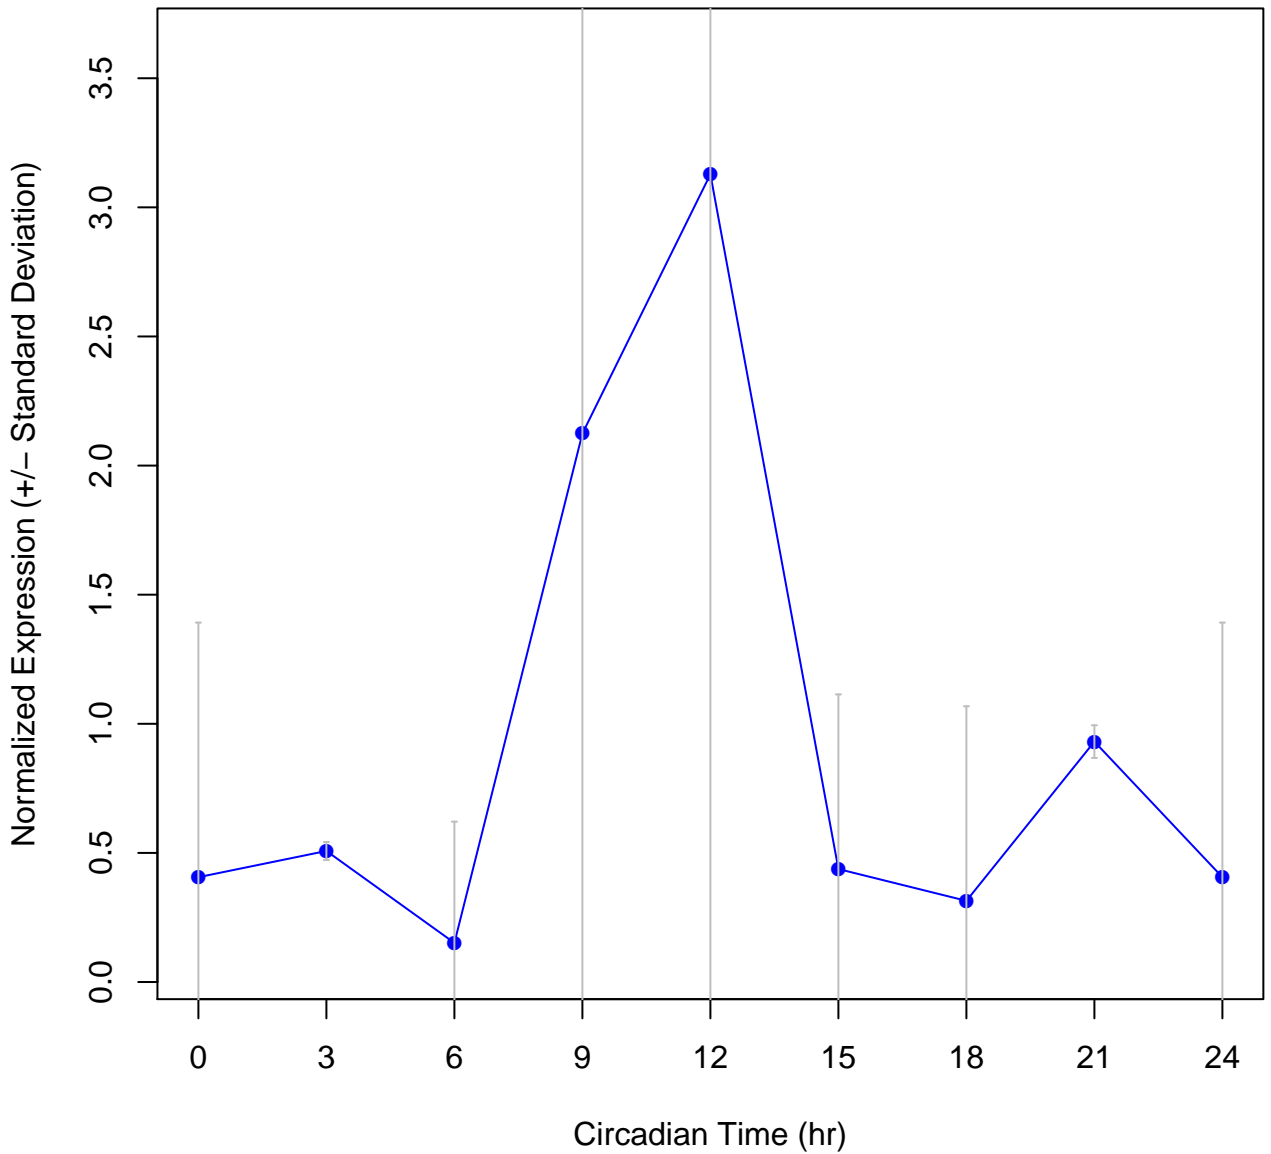

Supplement Figure 5 dnah7

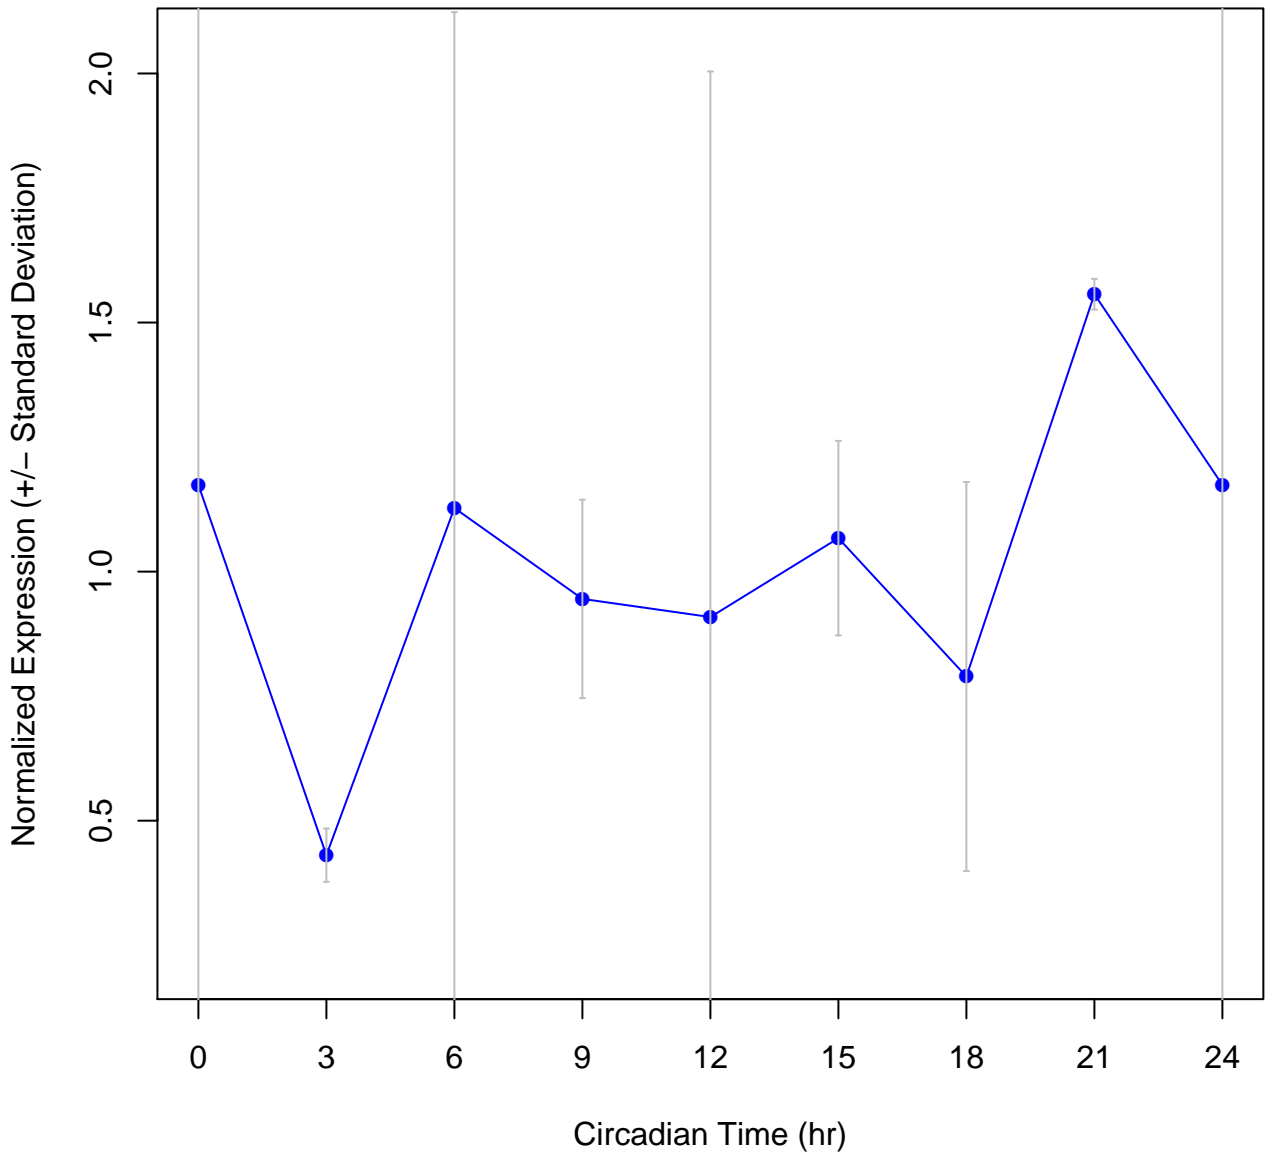

Supplement Figure 5 dnajb4

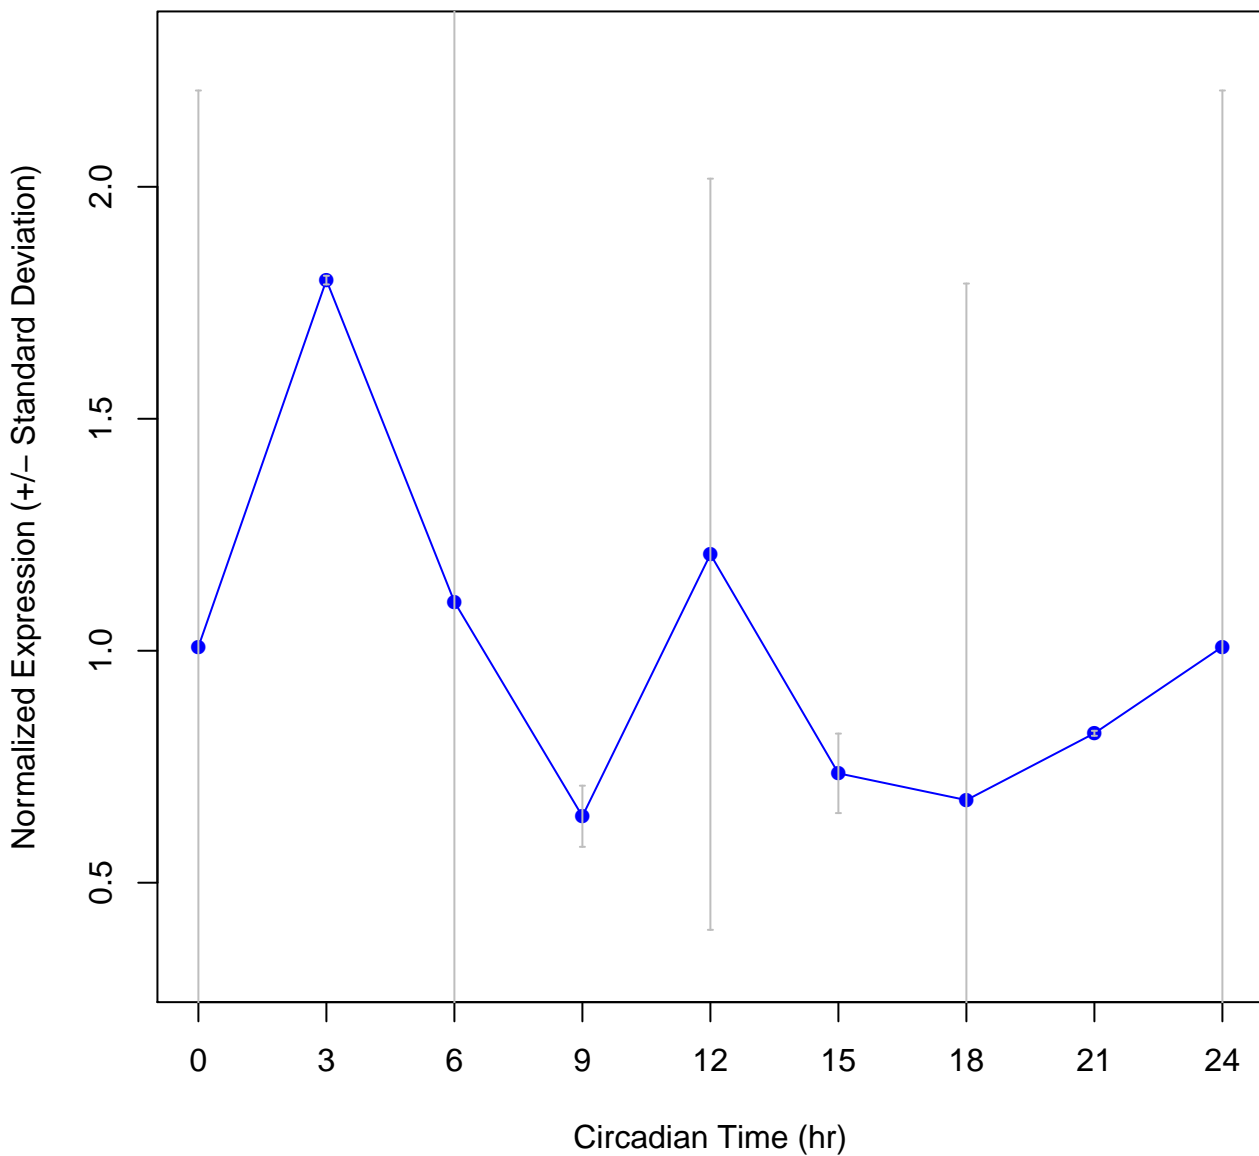

Supplement Figure 5 dscam1l

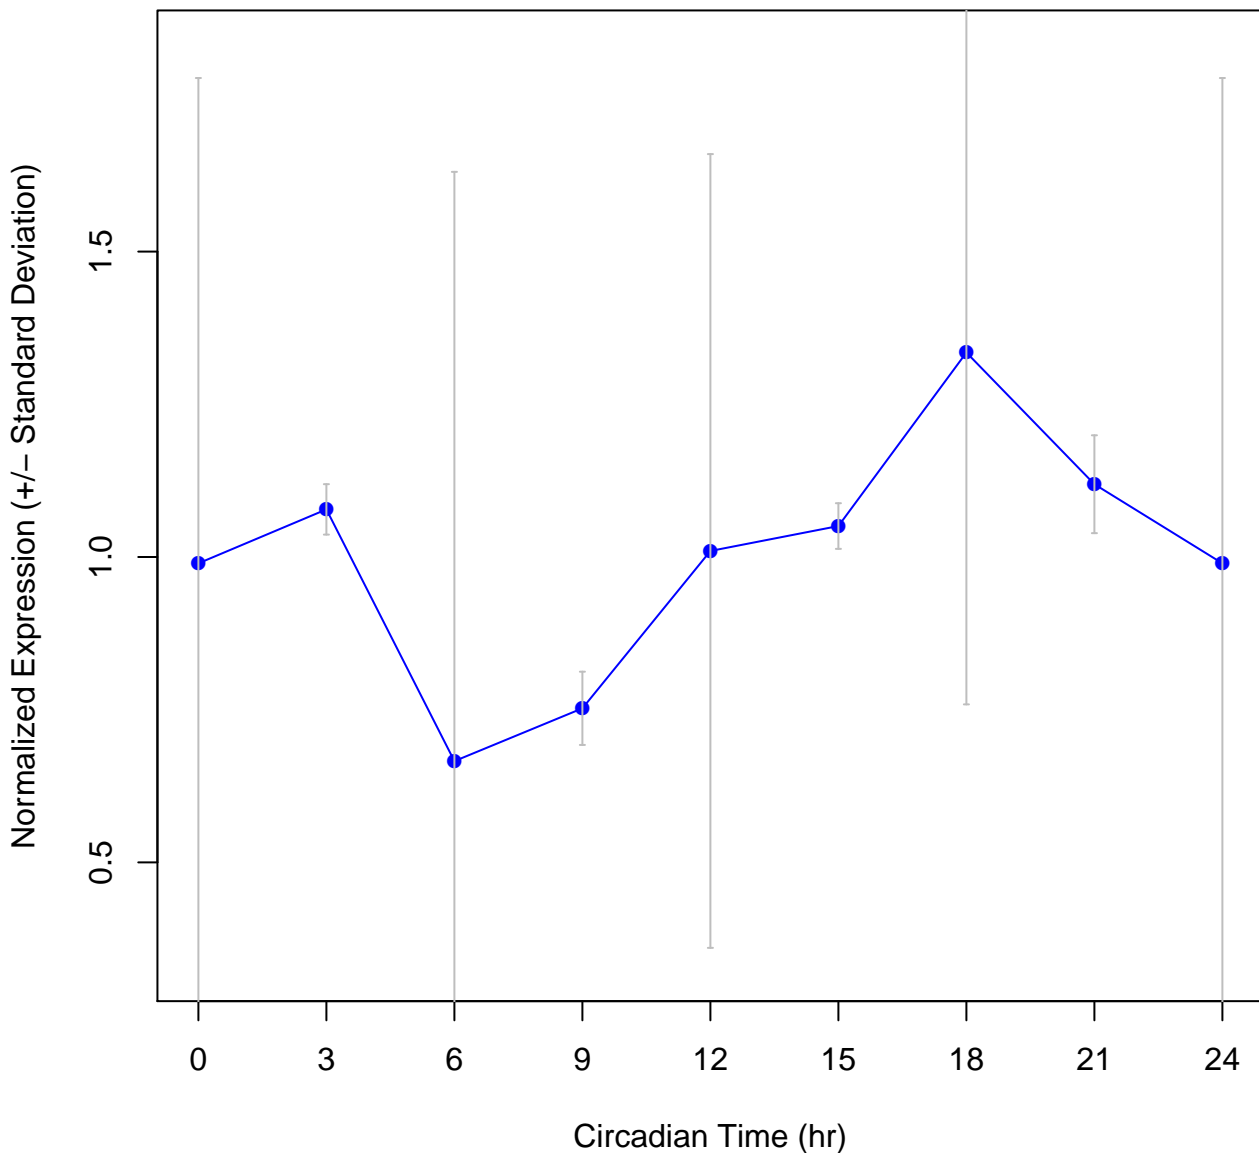



Supplement Figure 5 e2f

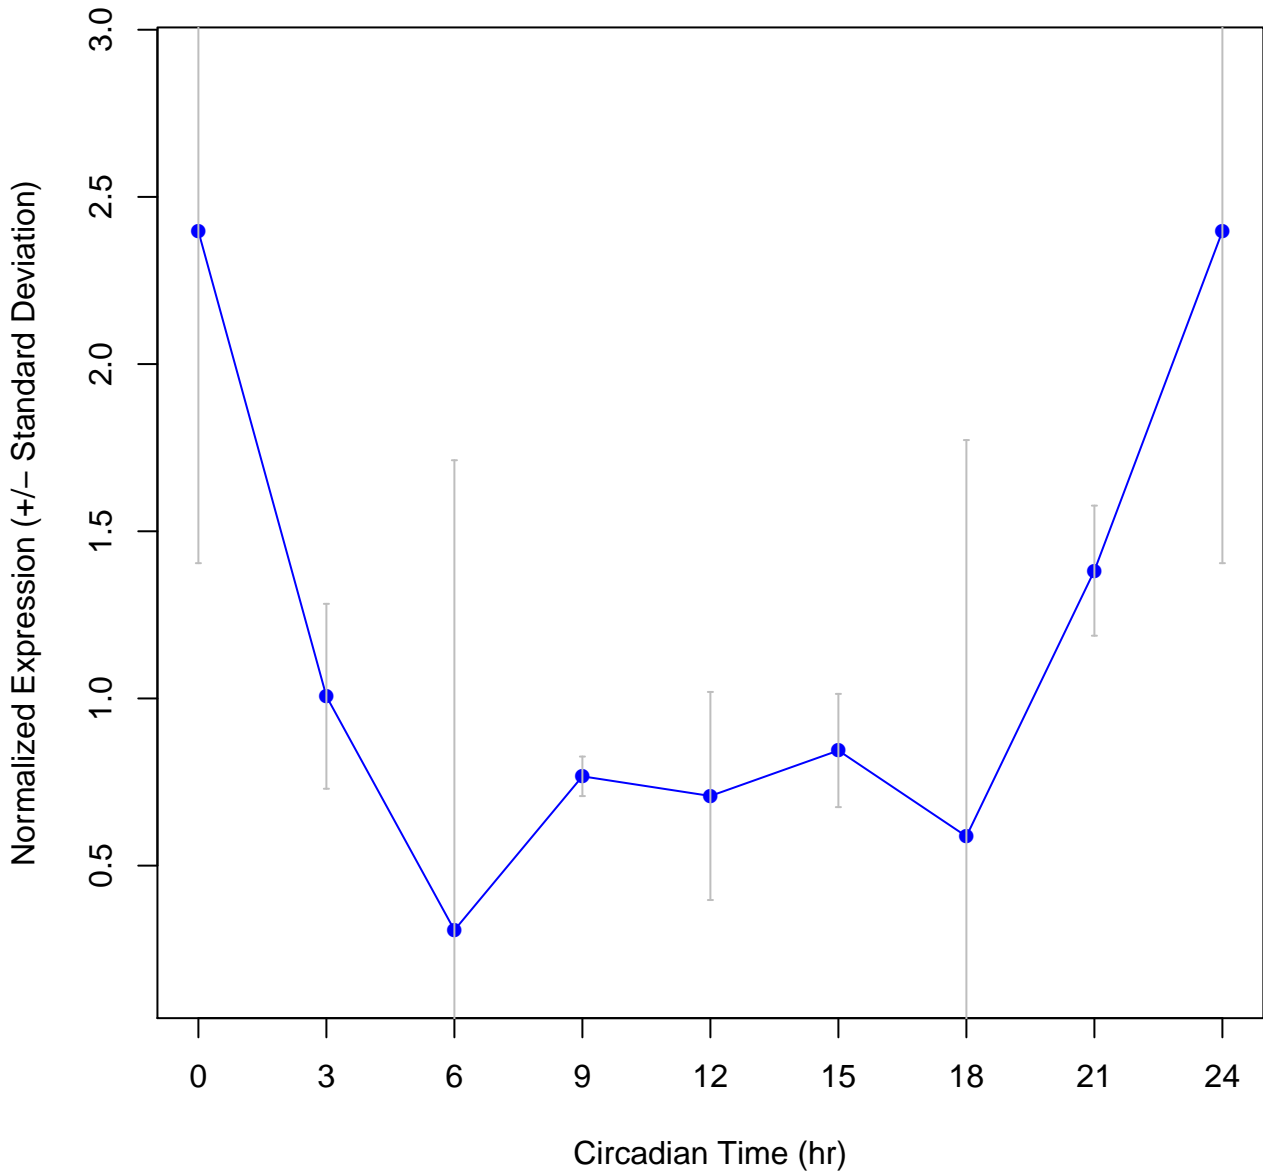

Supplement Figure 5 ect2

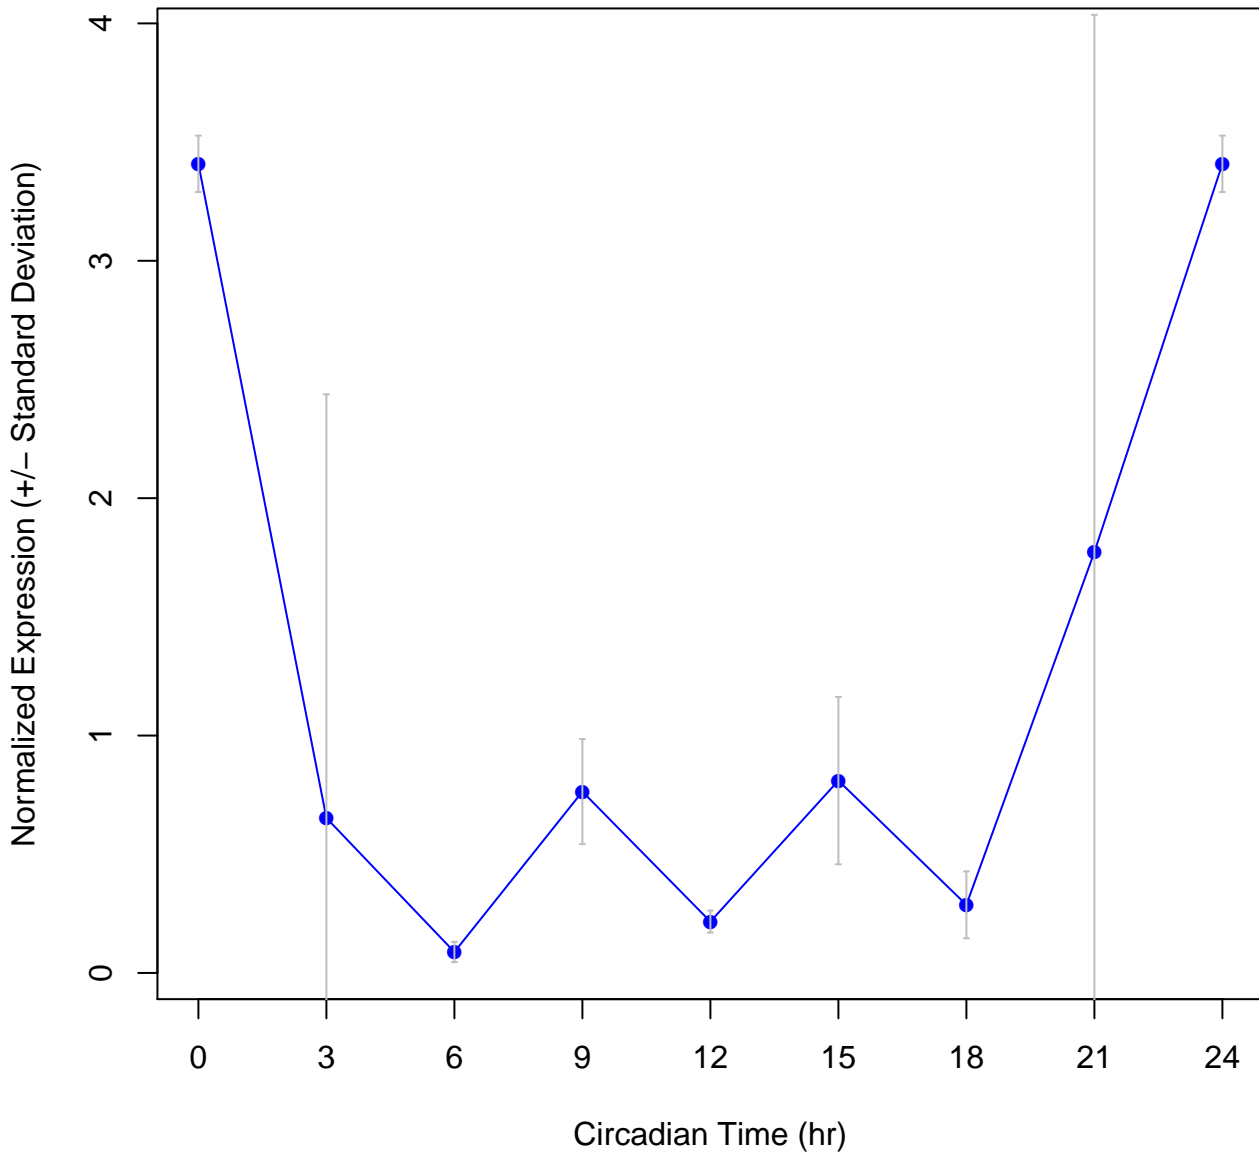

**Supplement Figure 5 enox1**

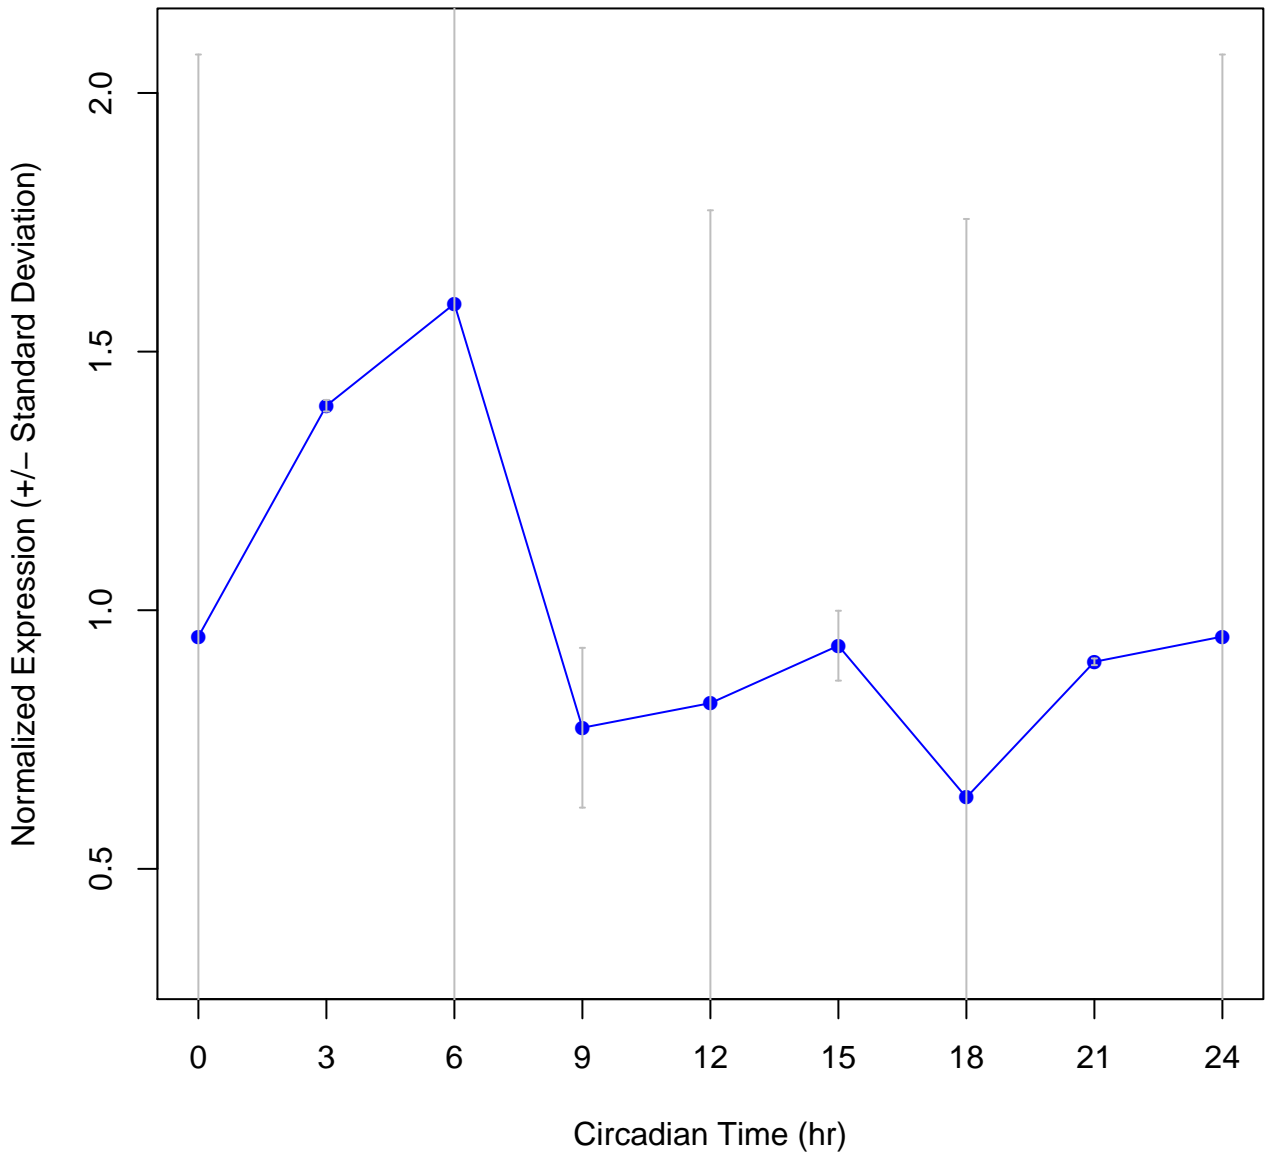

**Supplement Figure 5 enox2**

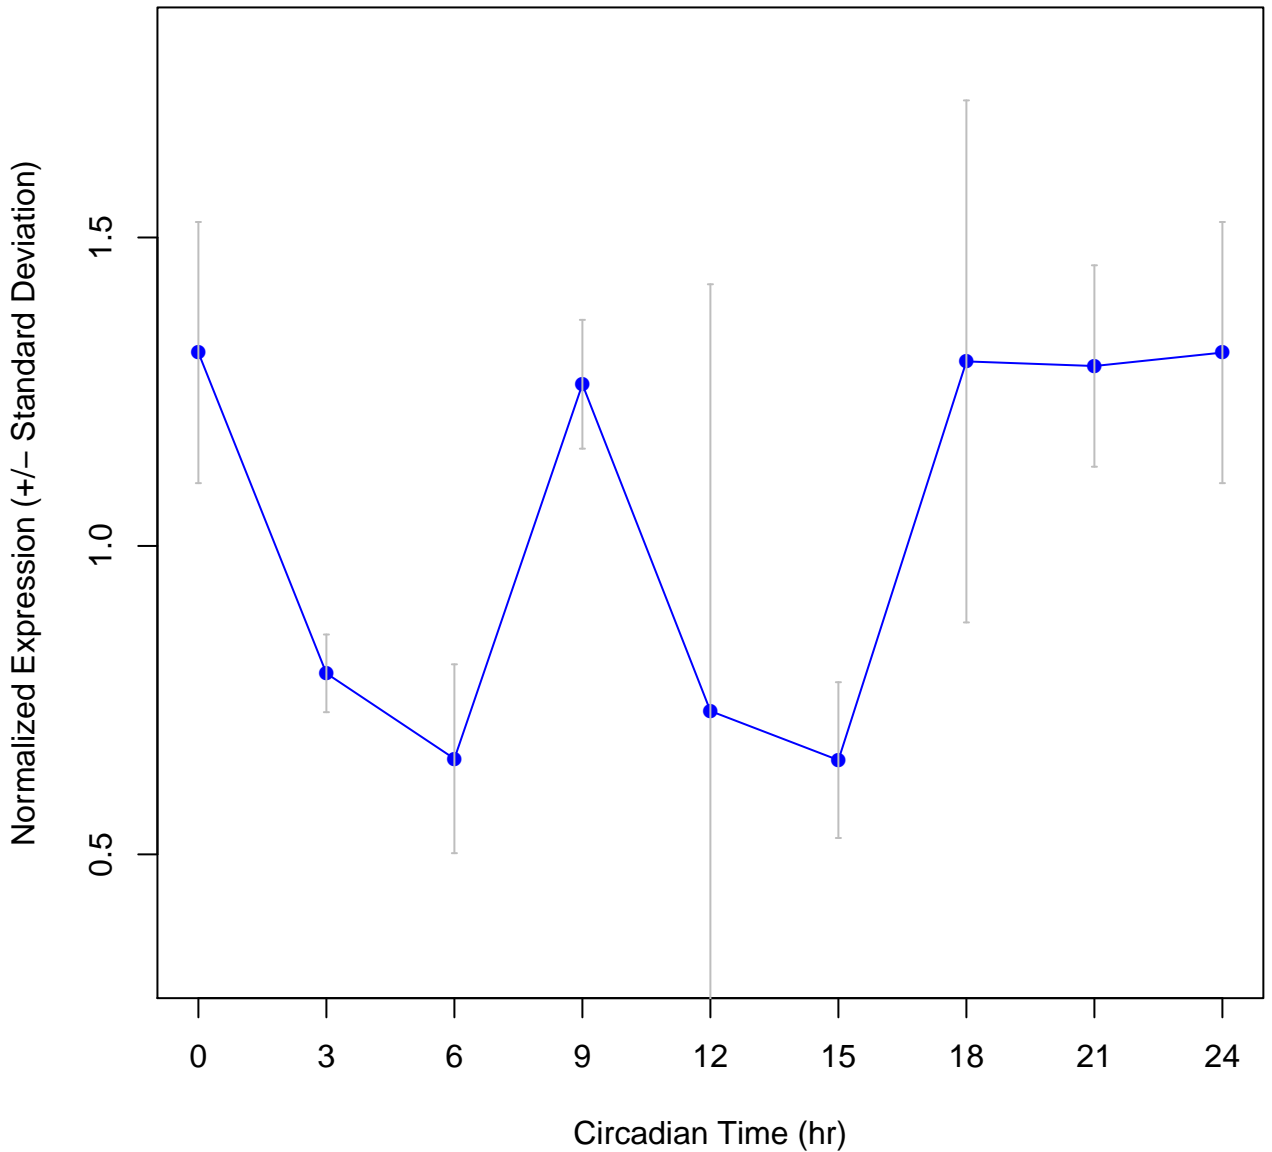

Supplement Figure 5 ensxmag00000013922

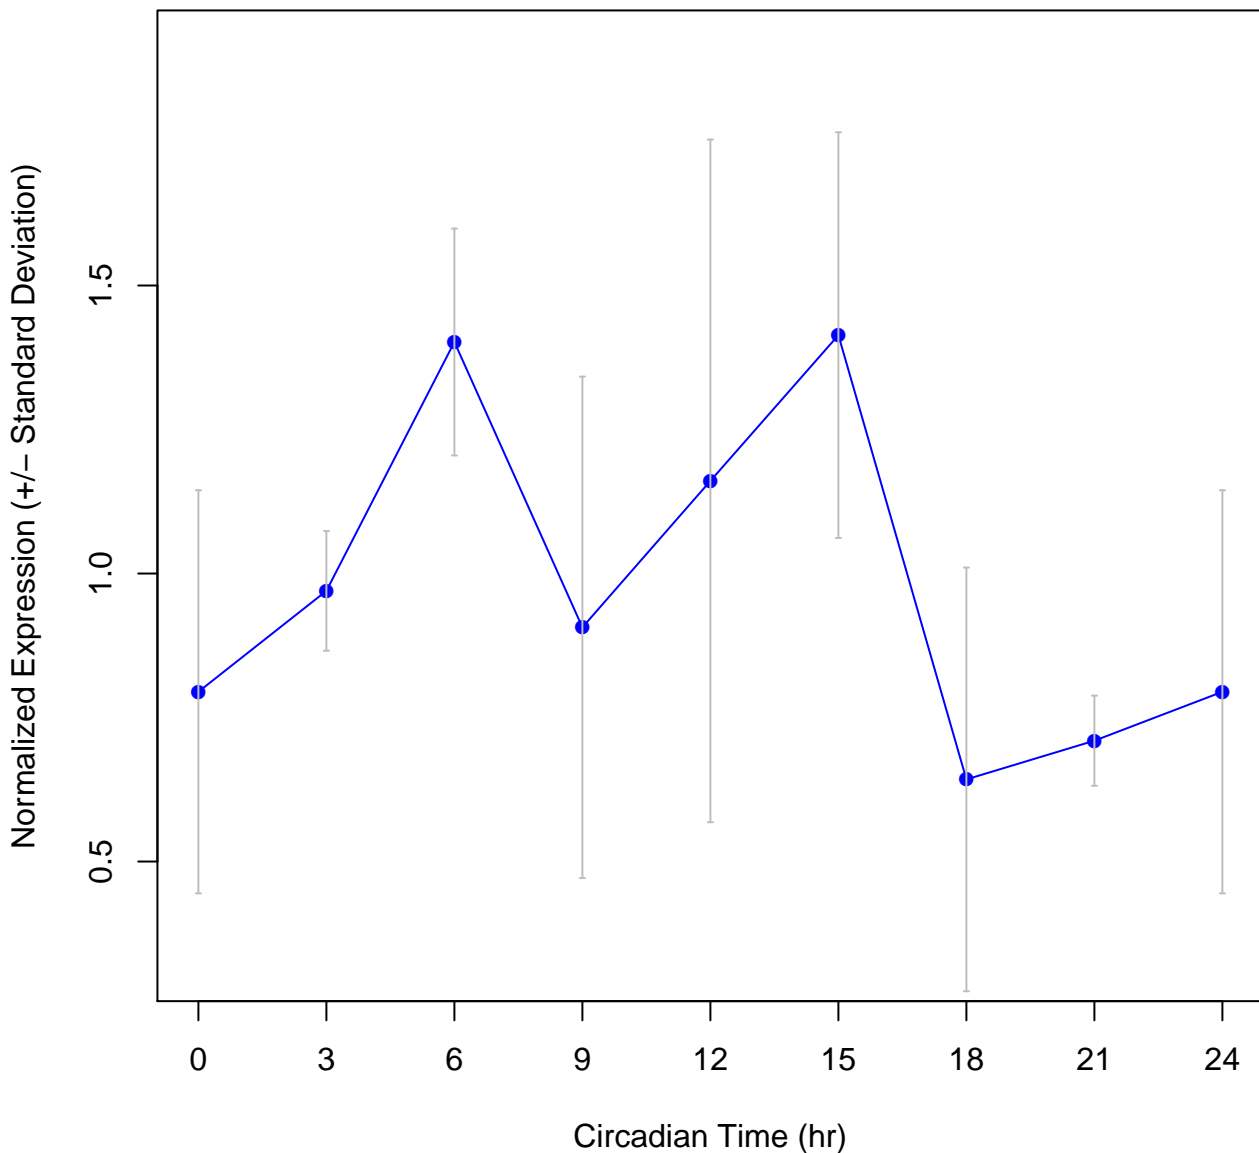

**Supplement Figure 5 ensxmag00000017815**

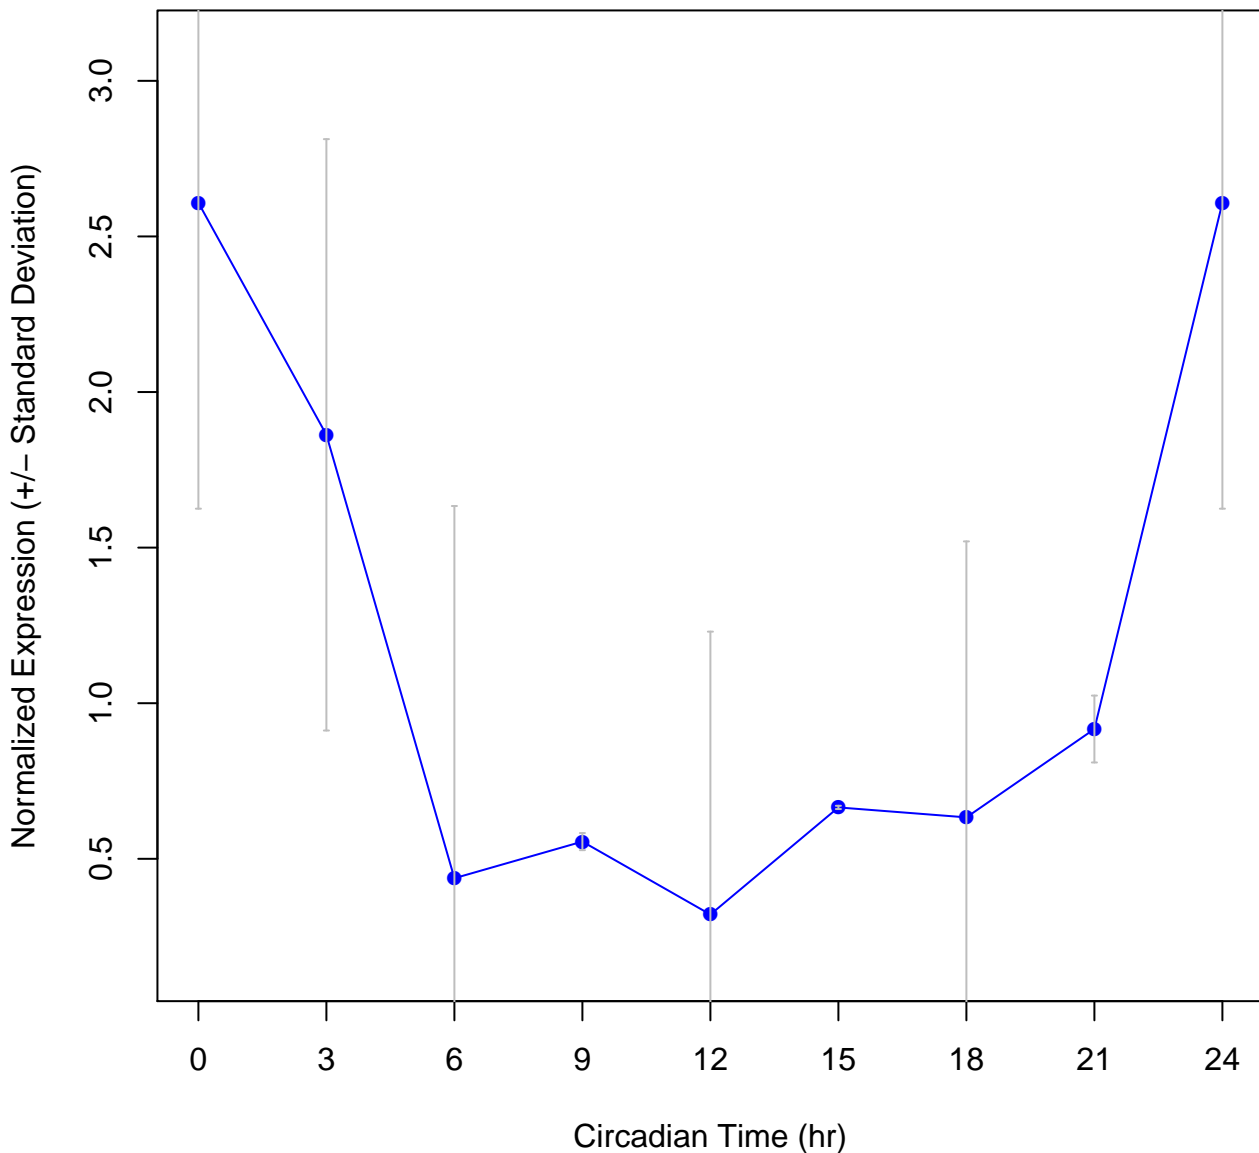

## Supplement Figure 5 ercc3

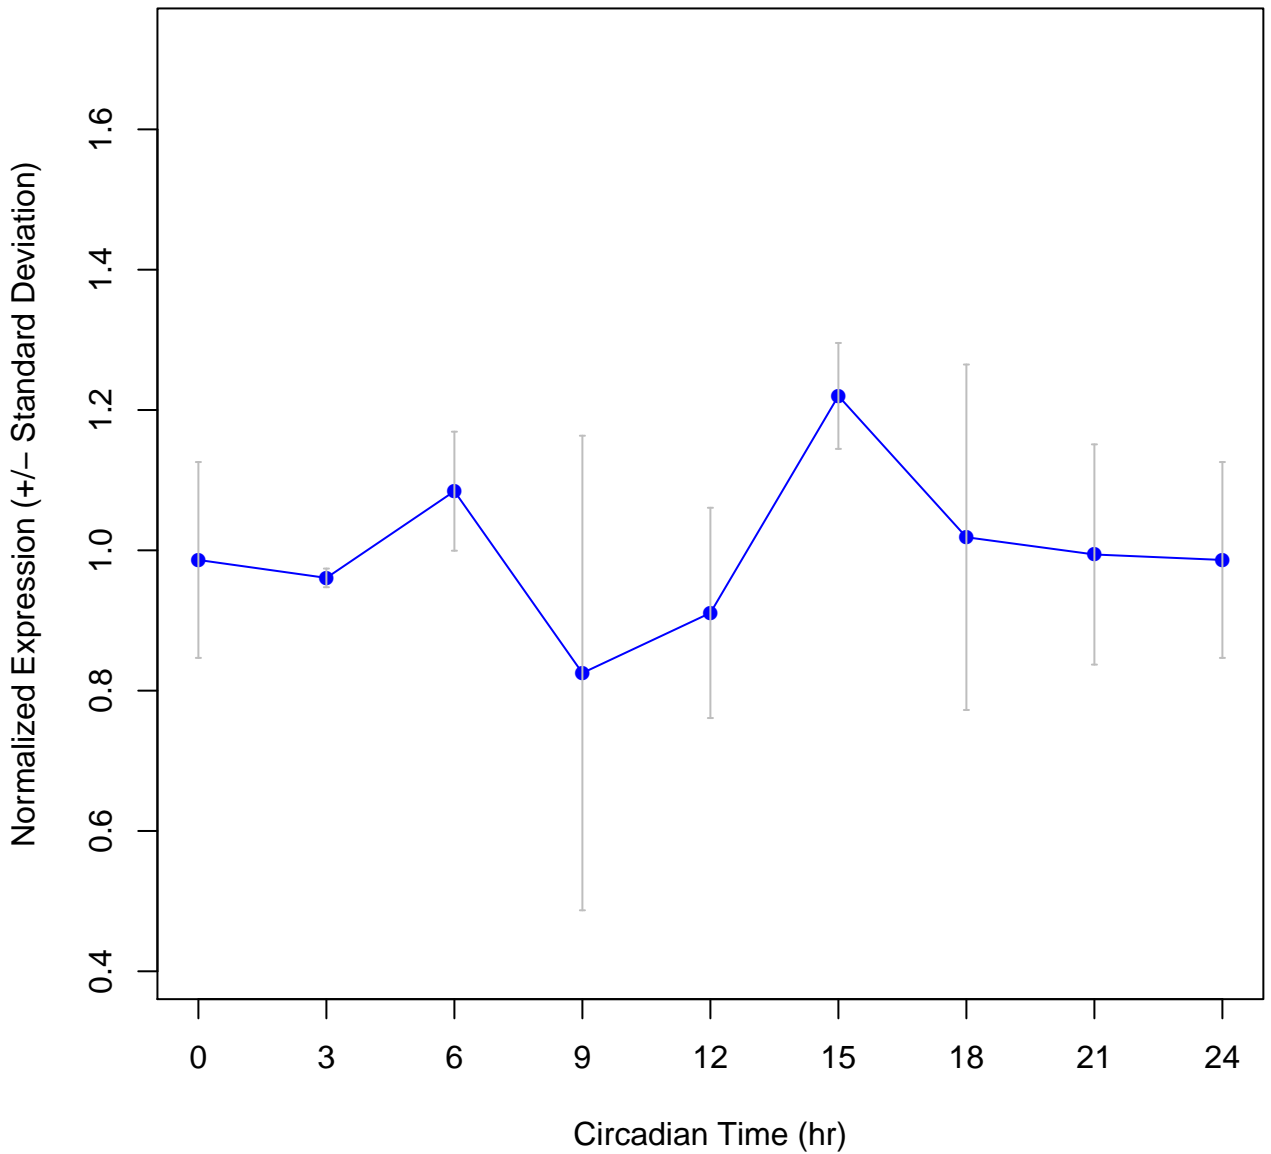

## Supplement Figure 5 esp11

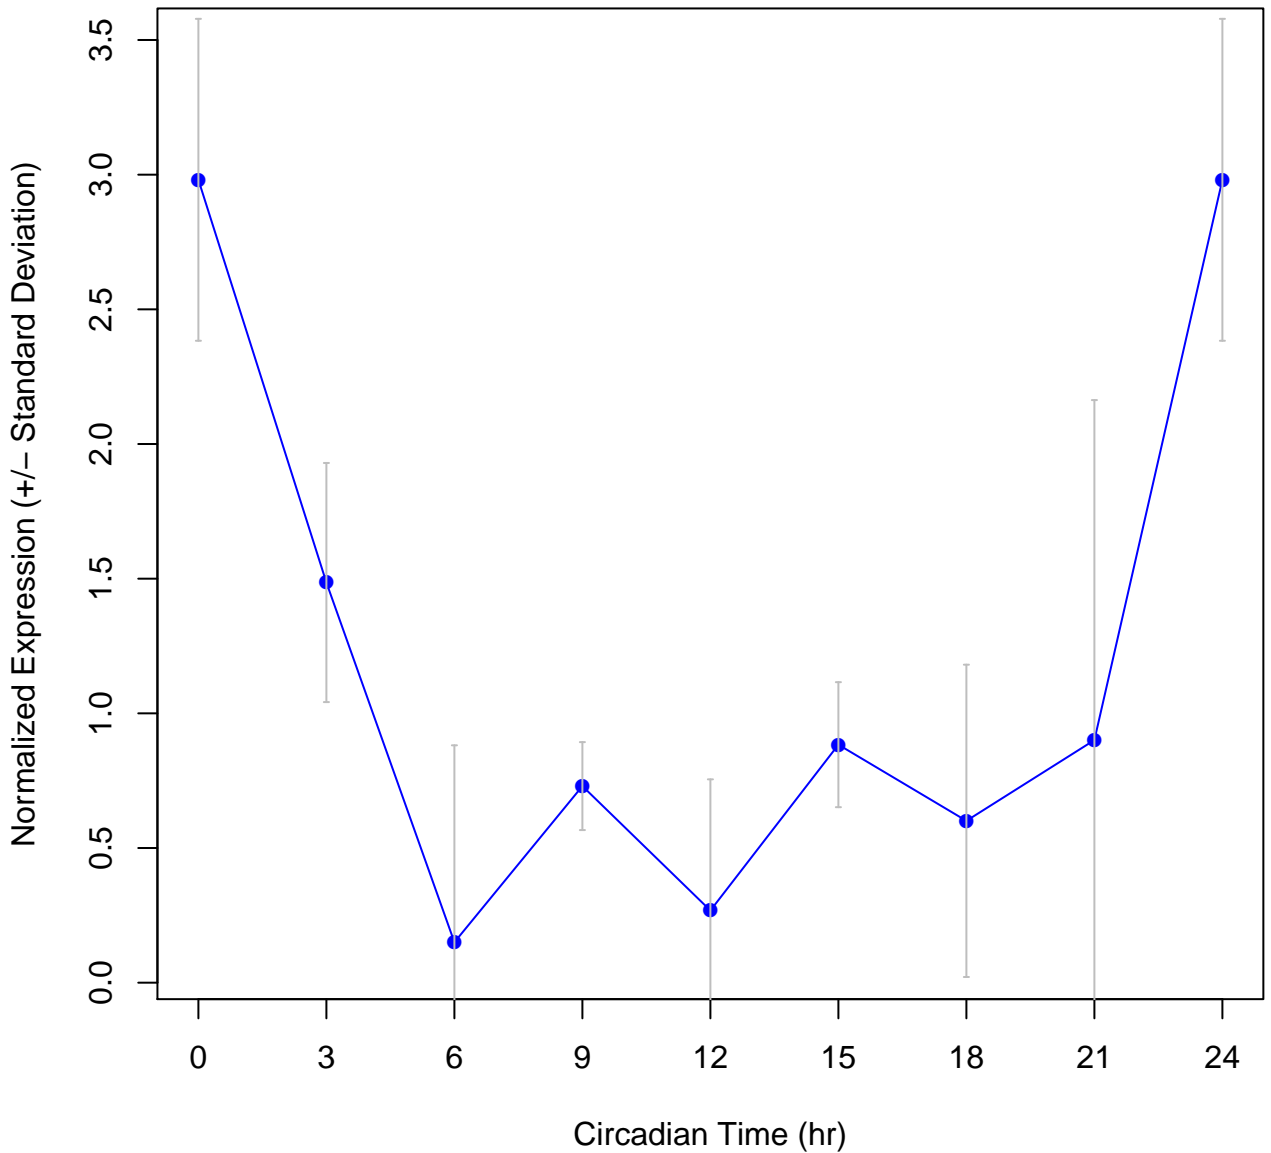



Supplement Figure 5 e2r

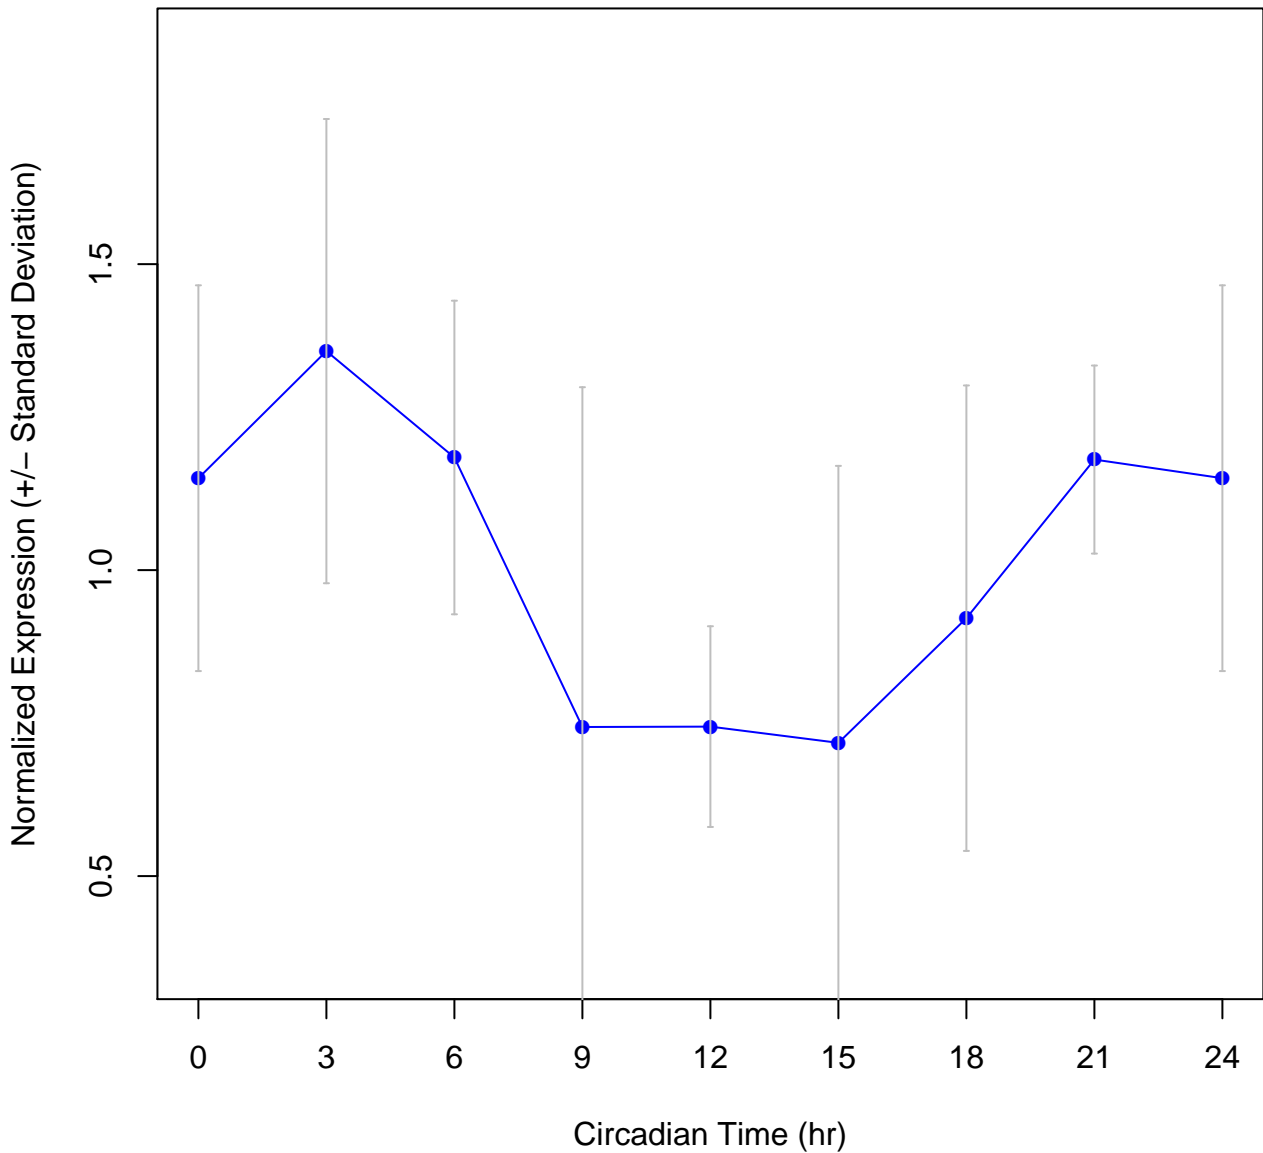

Supplement Figure 5 fam102b

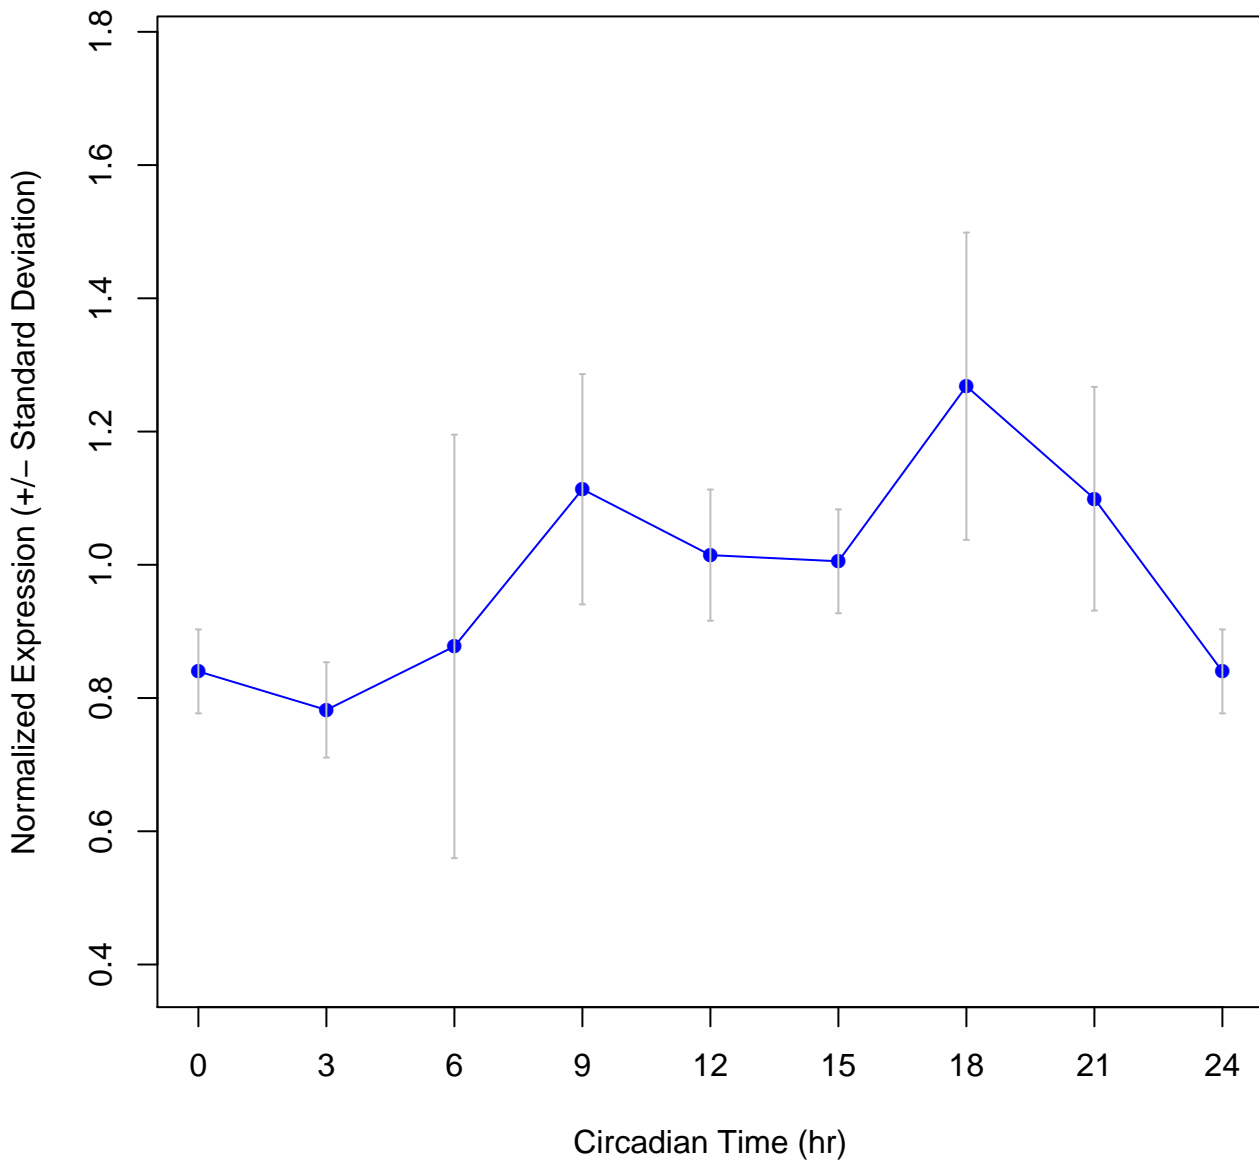

**Supplement Figure 5 fasn**

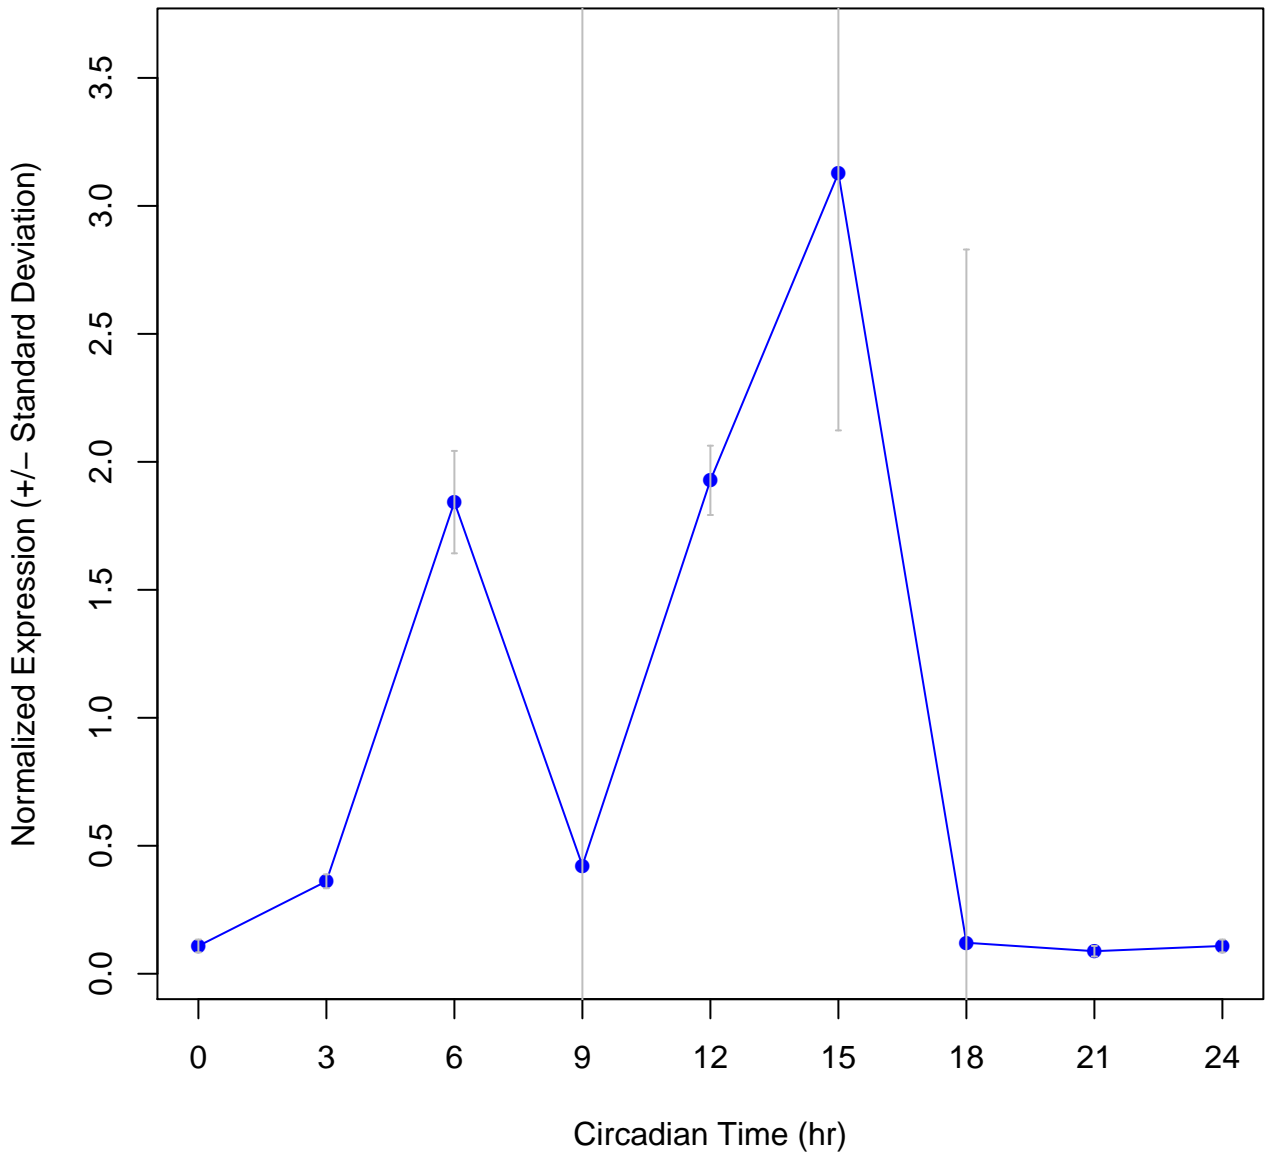

Supplement Figure 5 fbxw11

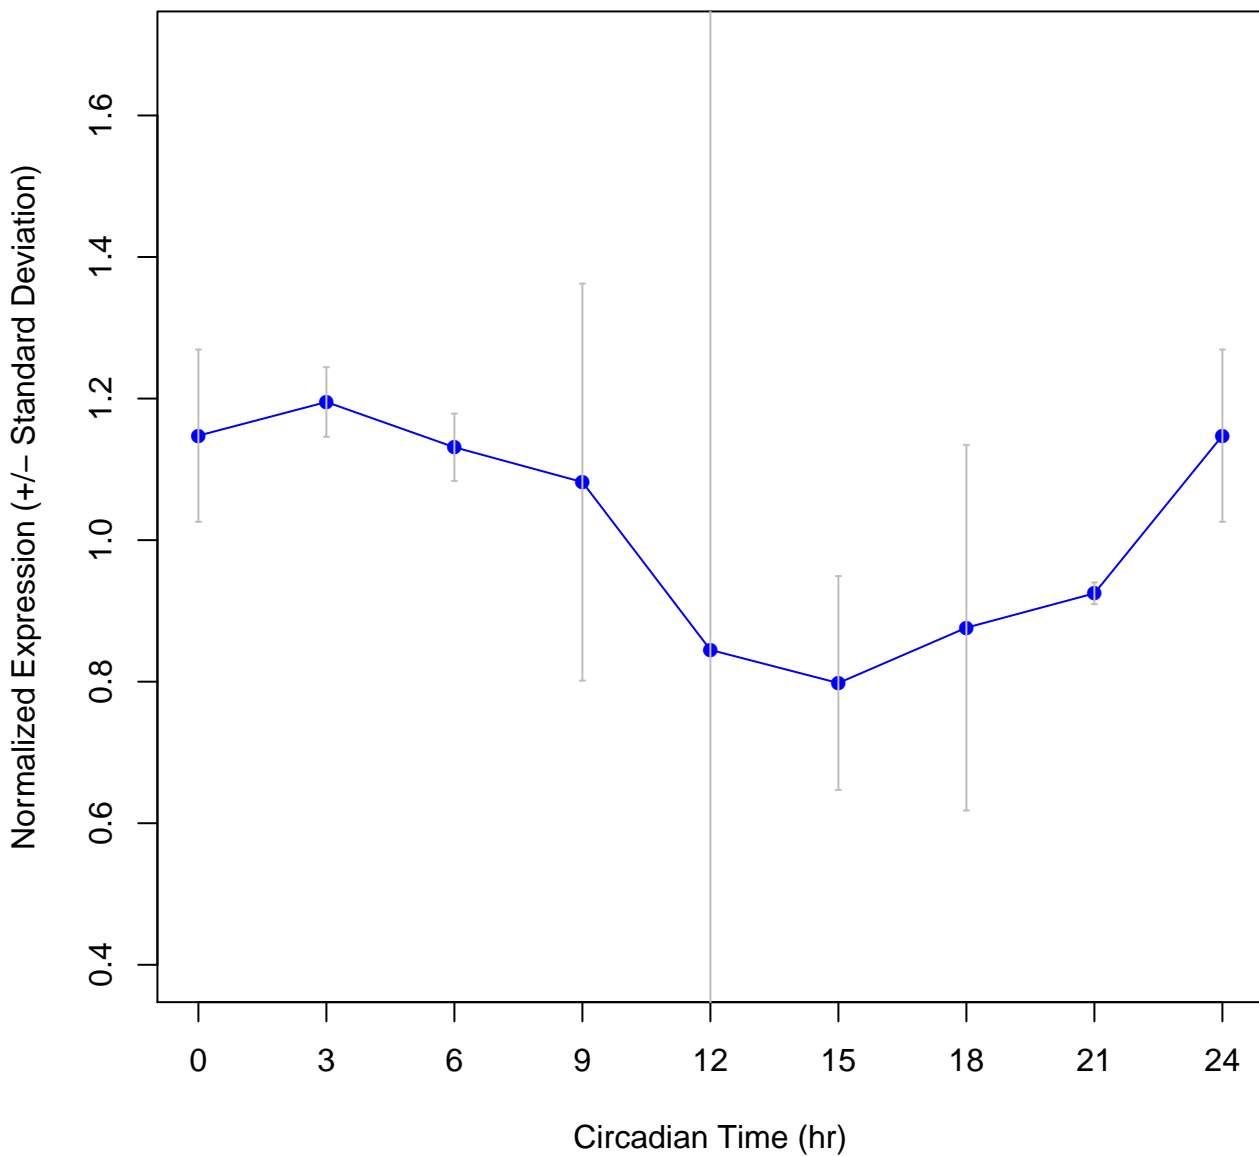

Supplement Figure 5 fggy

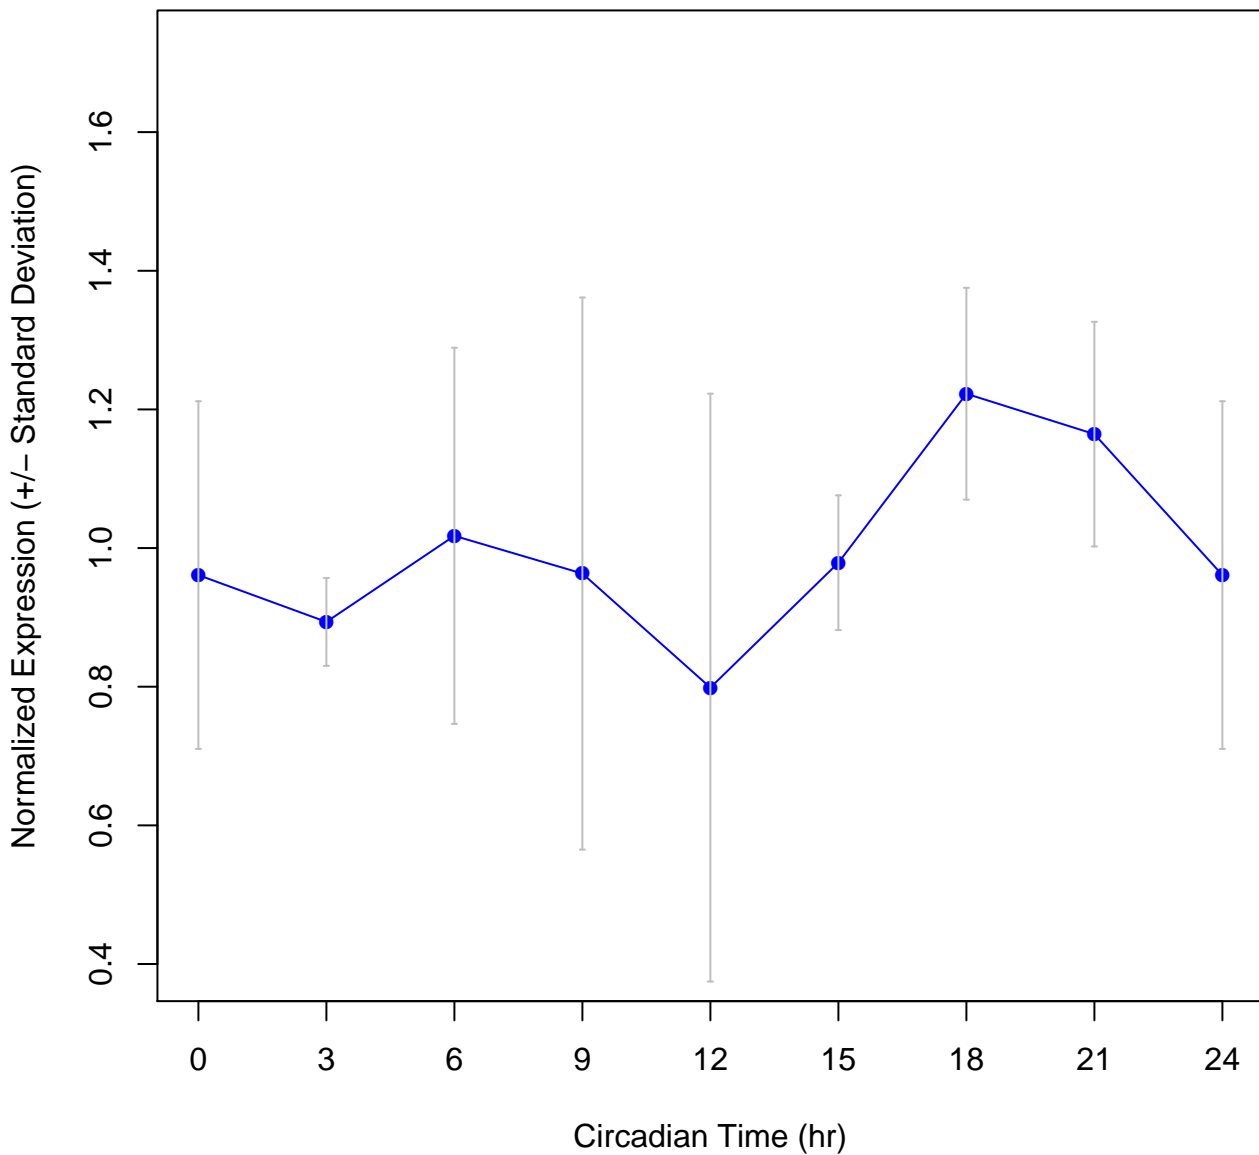

Supplement Figure 5 flt4

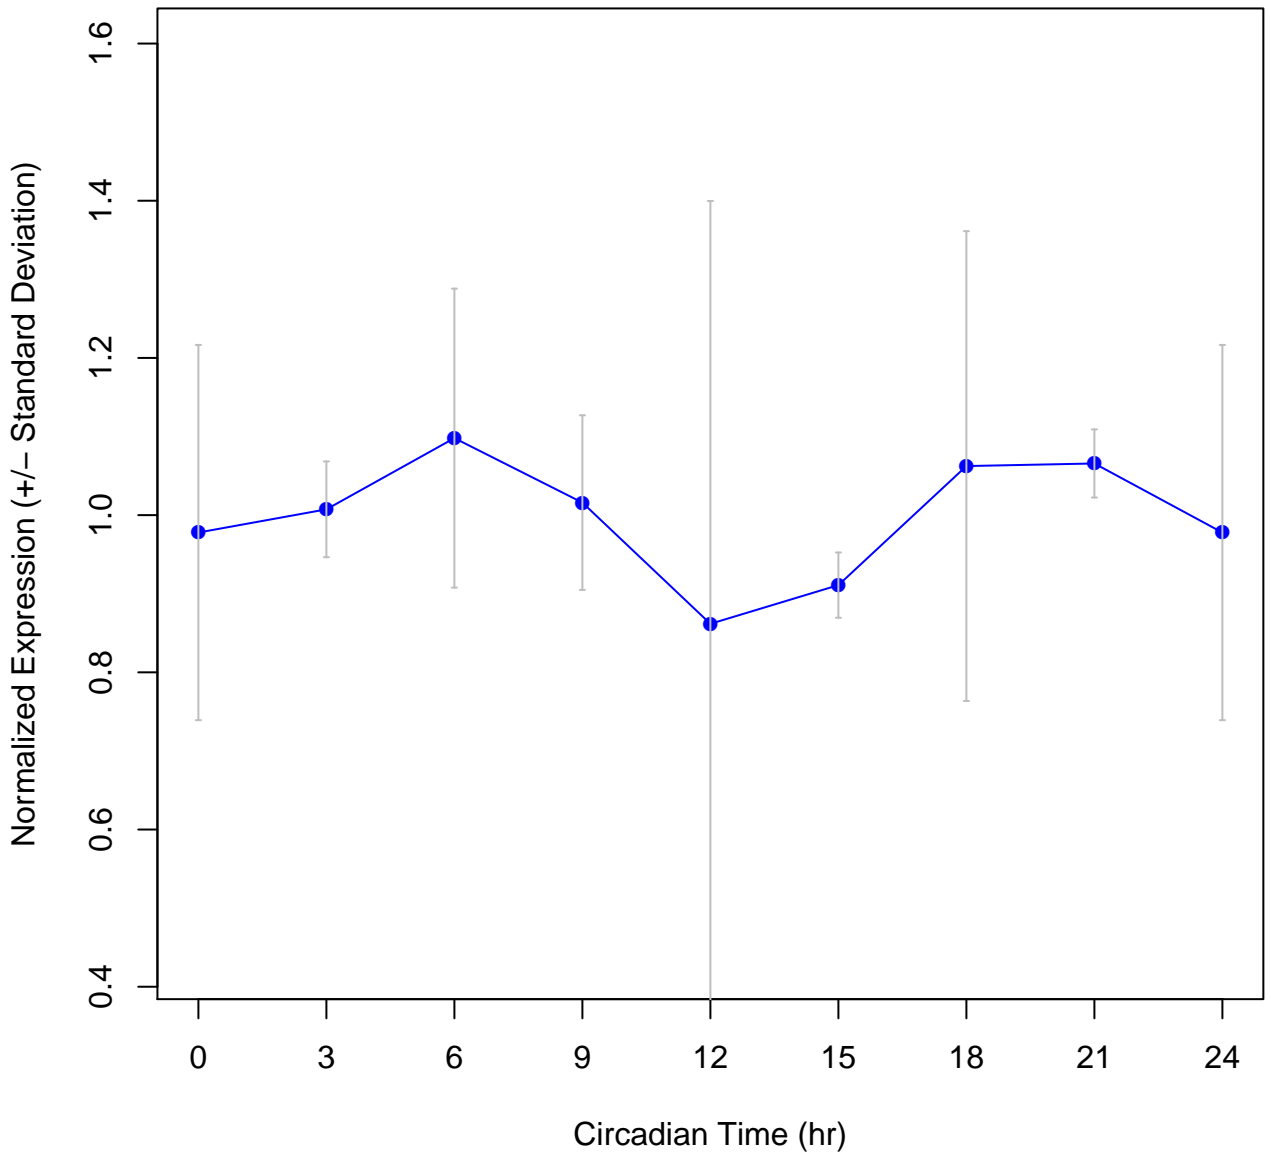

Supplement Figure 5 foxn1

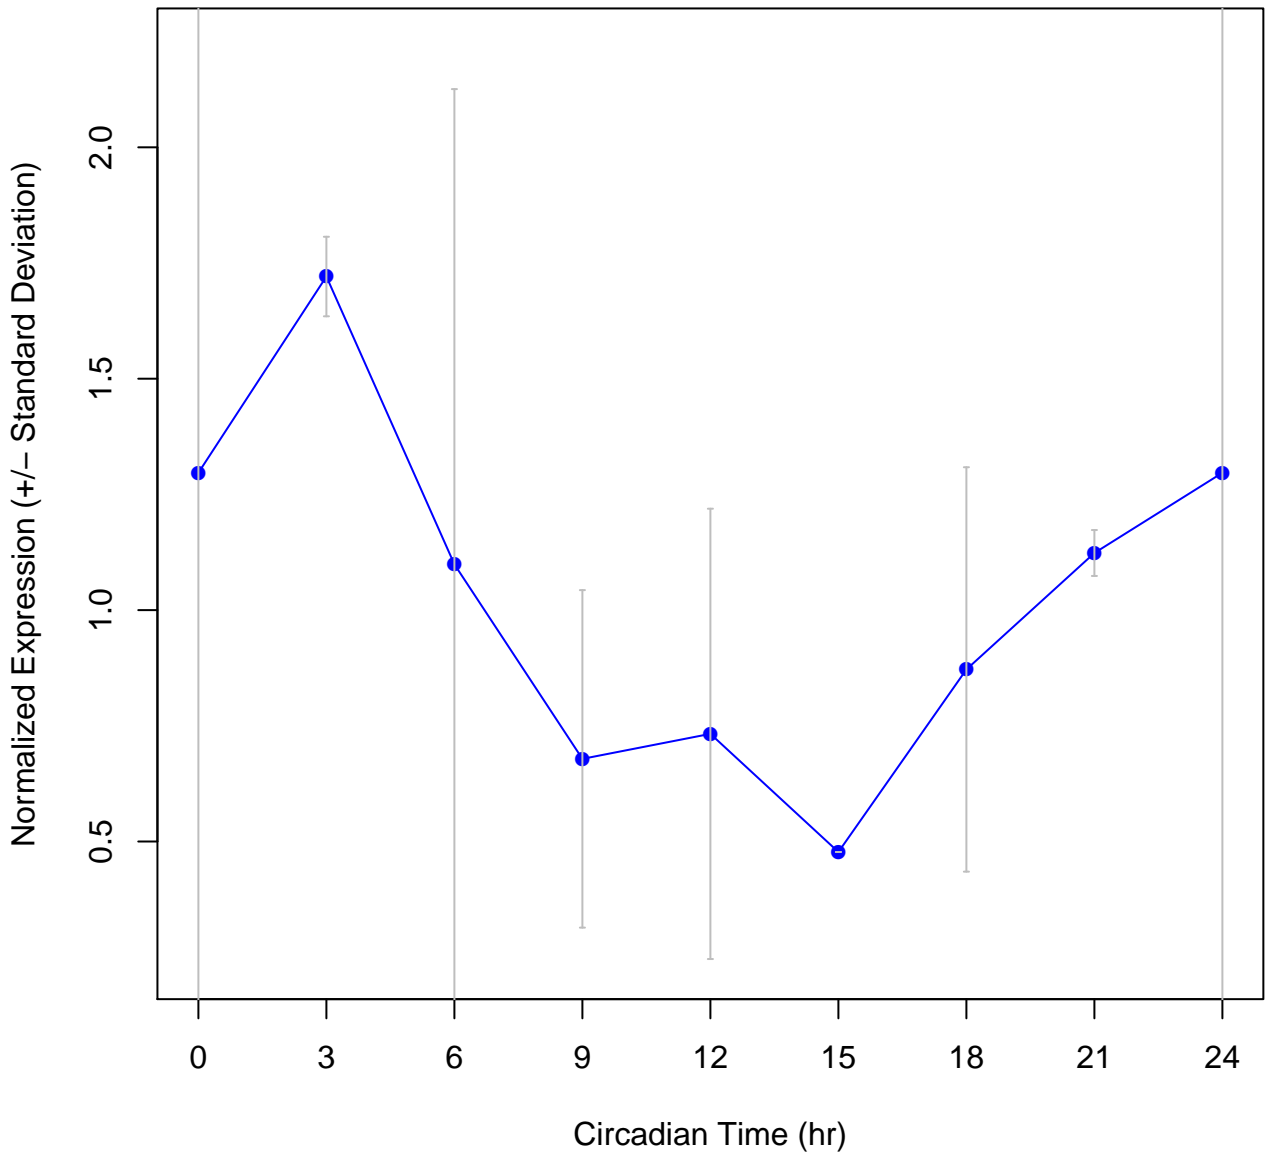

Supplement Figure 5 foxo4

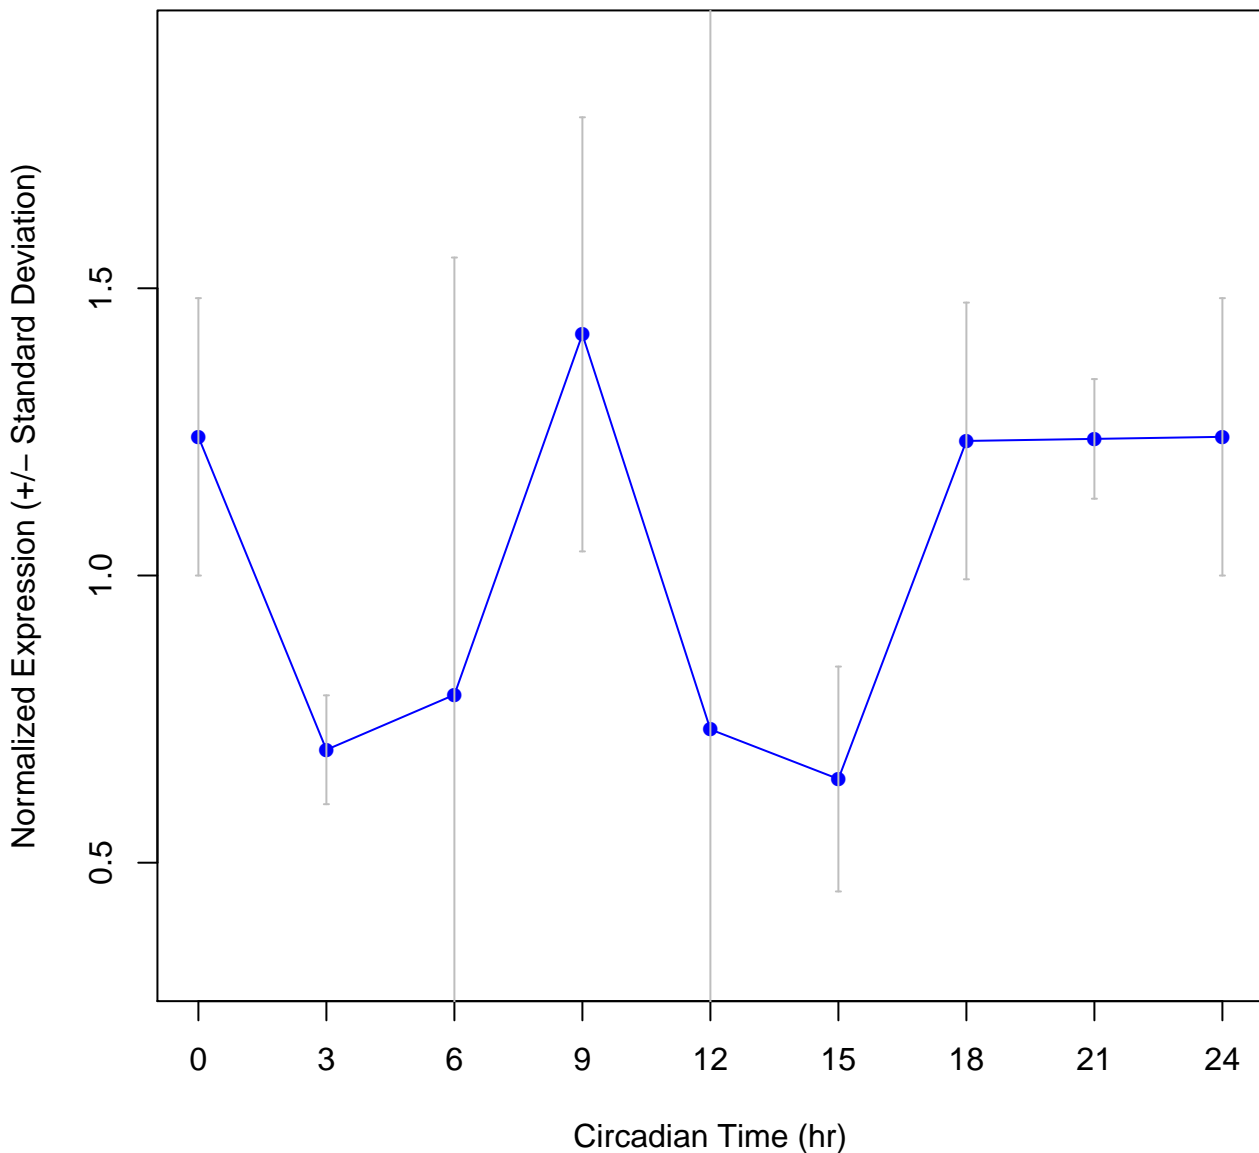



Supplement Figure 5 g2e3

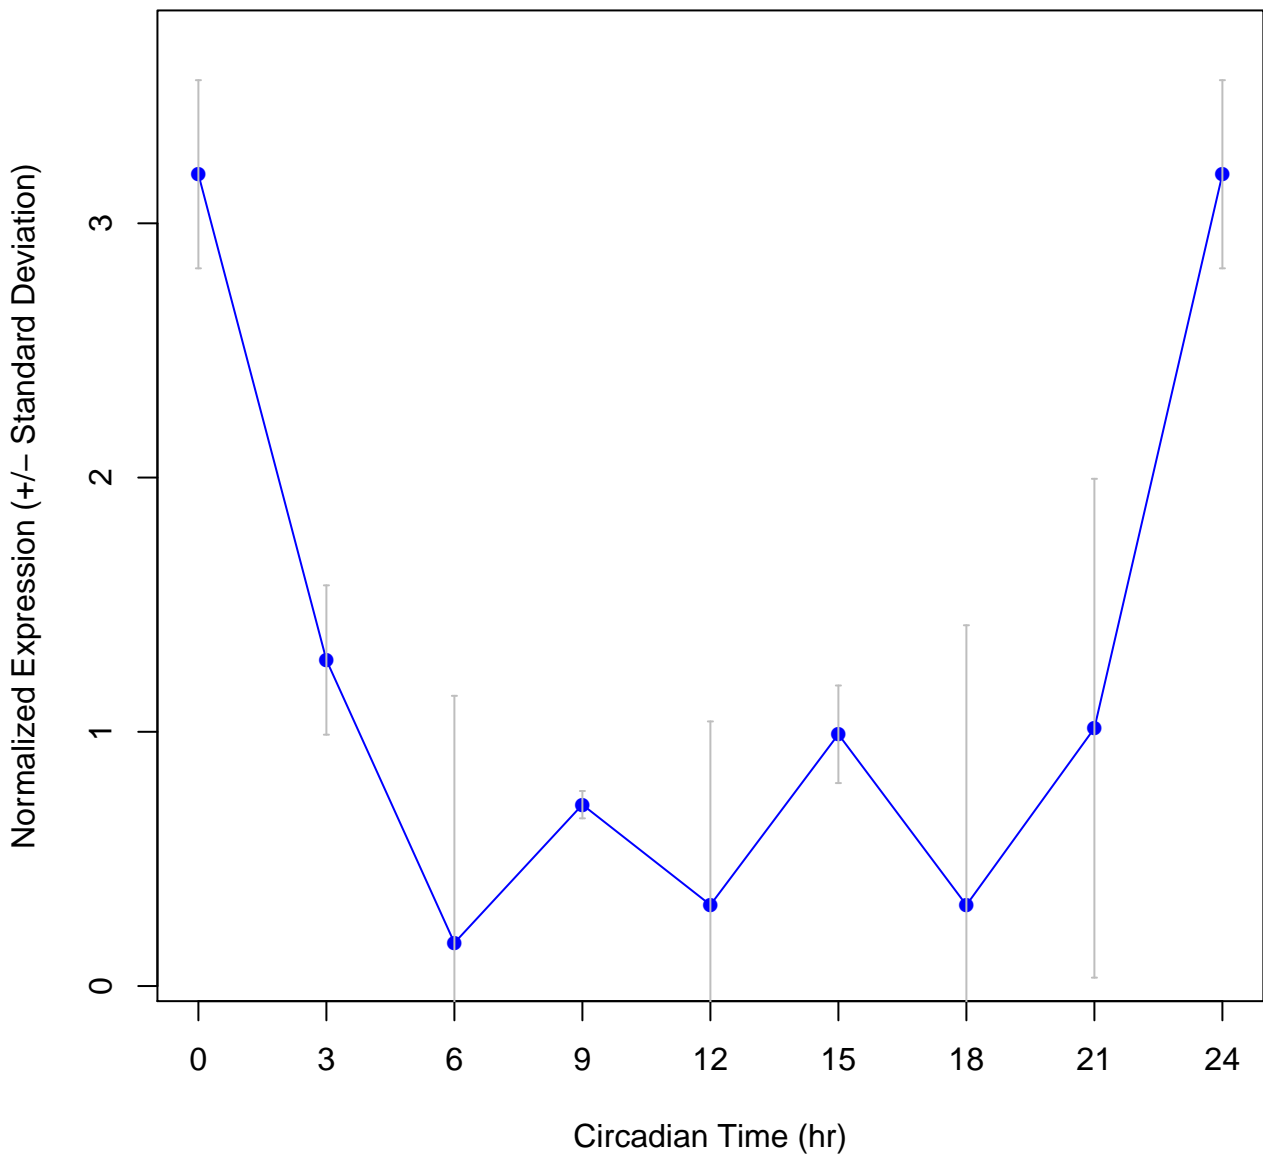

Supplement Figure 5 gadd45aa

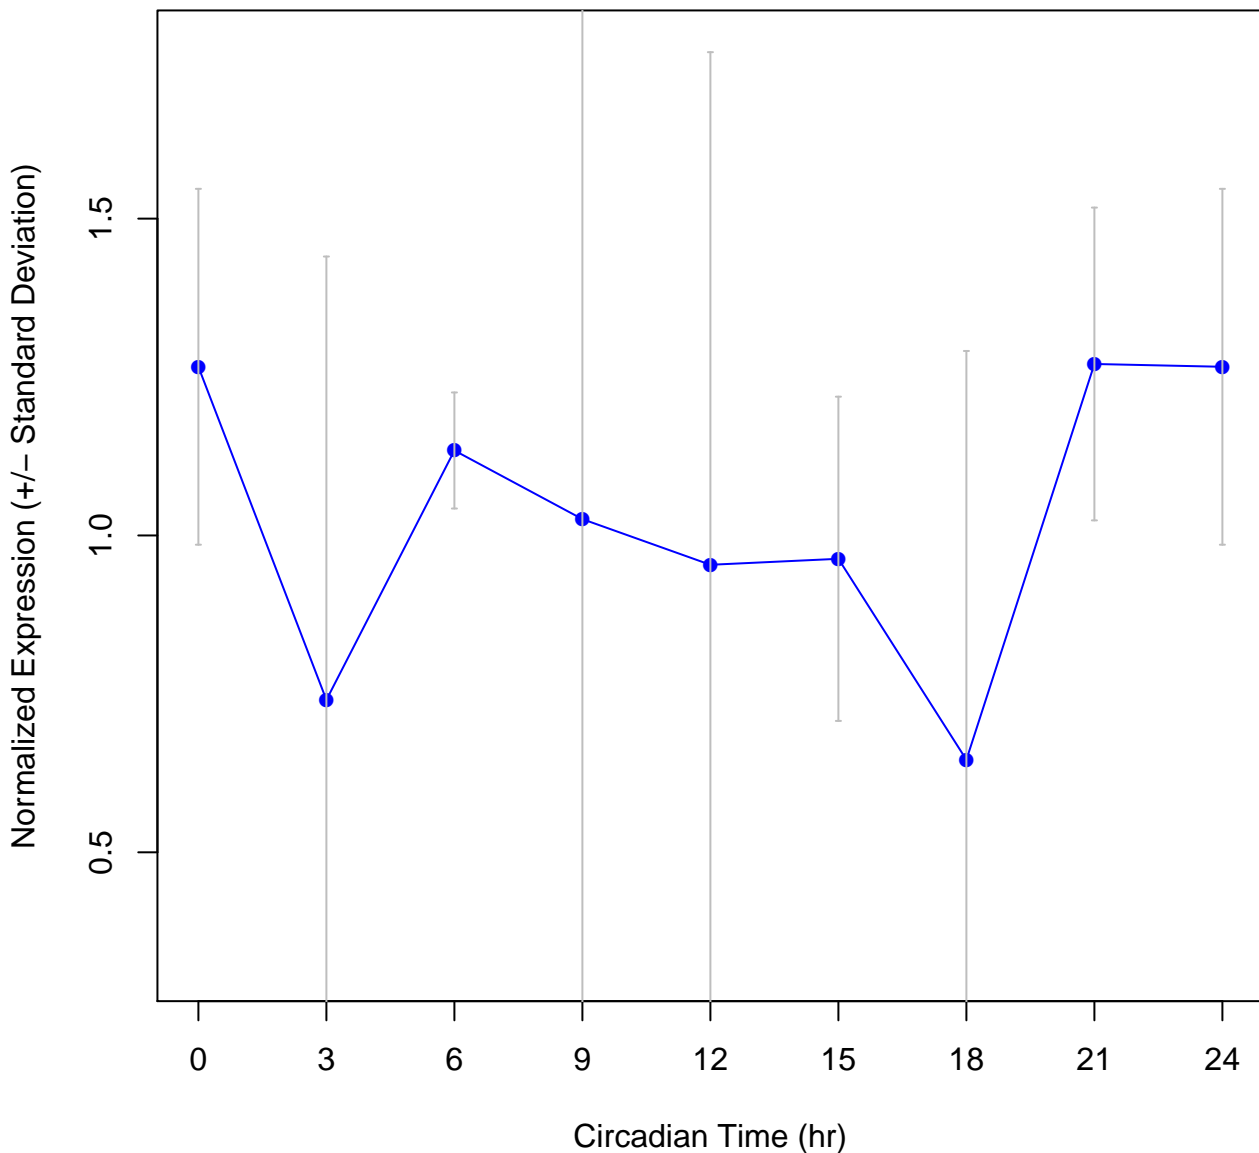

Supplement Figure 5 gadd45ab

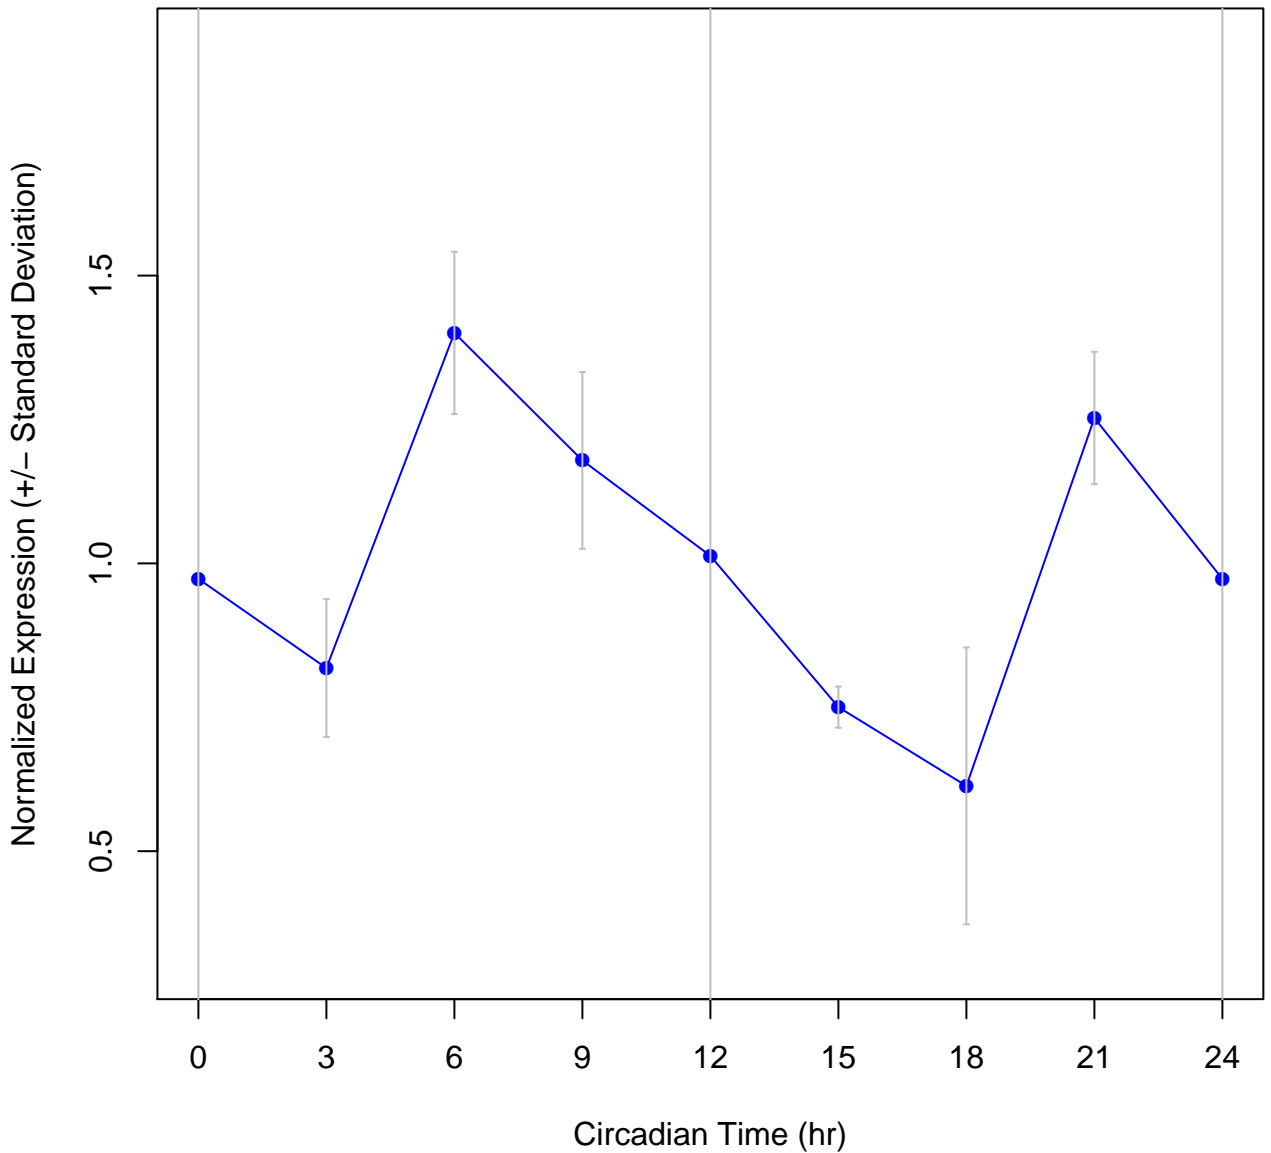

Supplement Figure 5 *gadd45b*

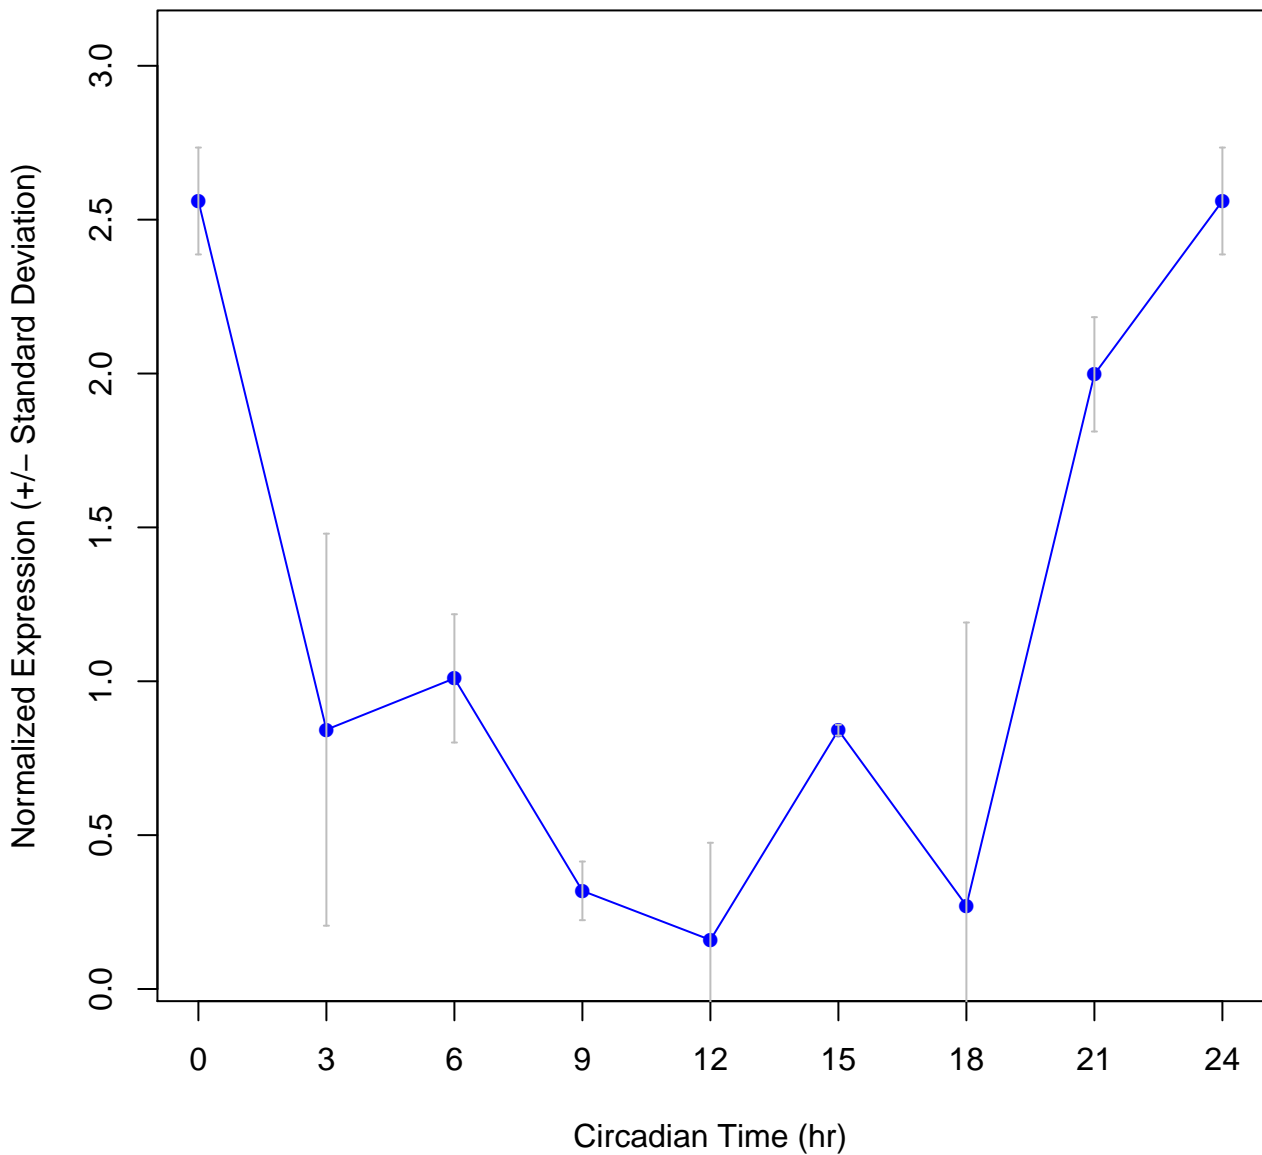

Supplement Figure 5 gna15

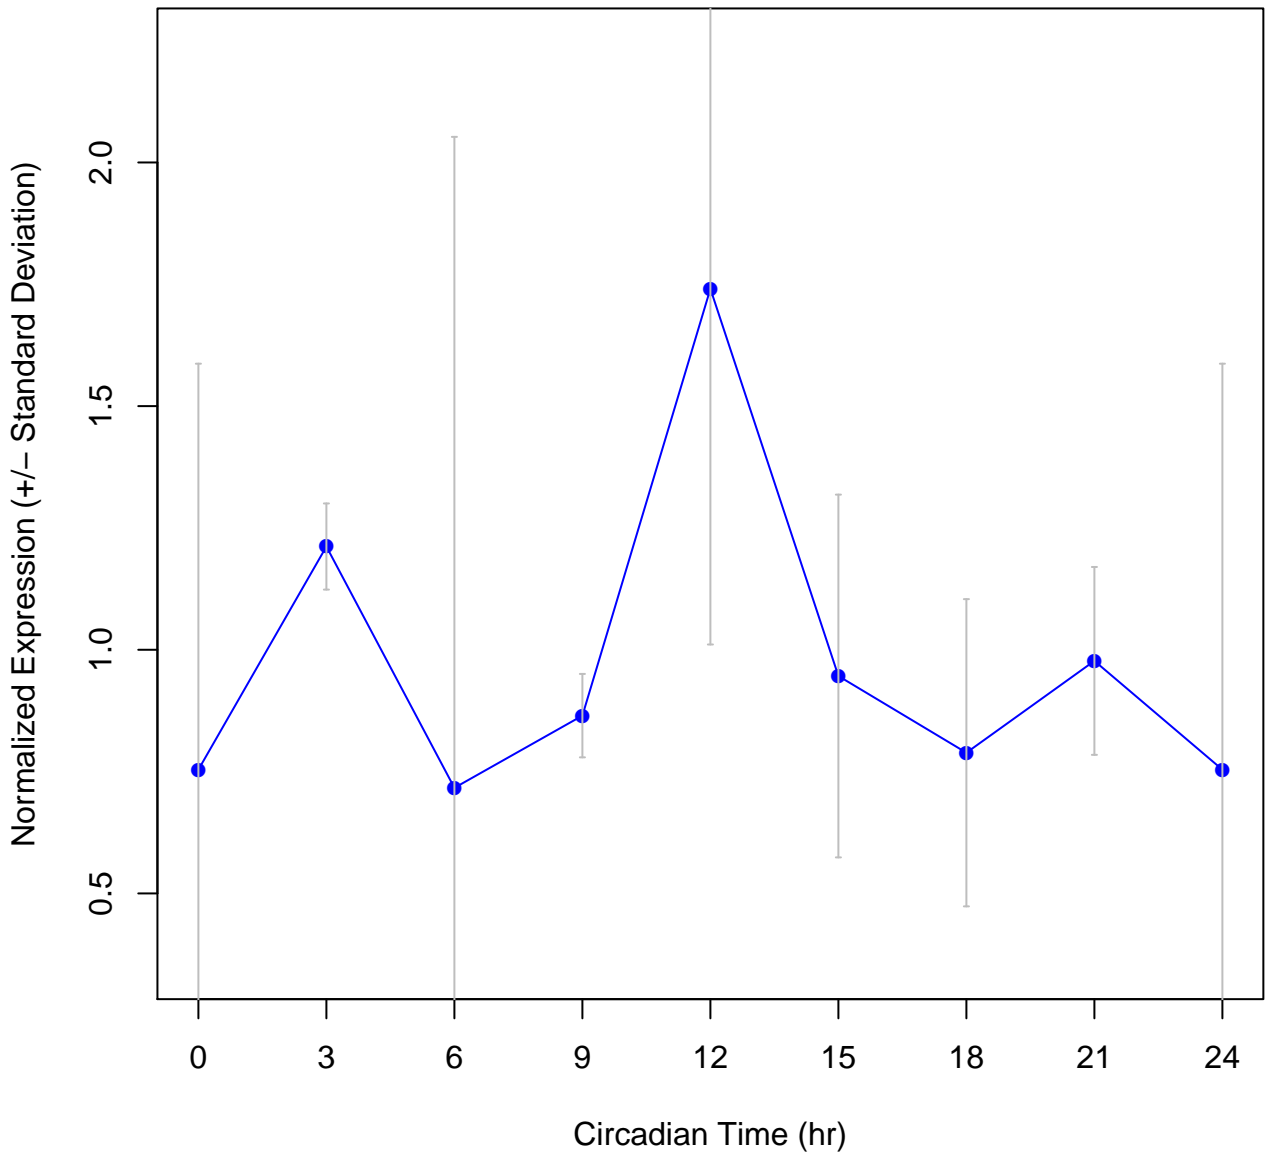

## Supplement Figure 5 grin1

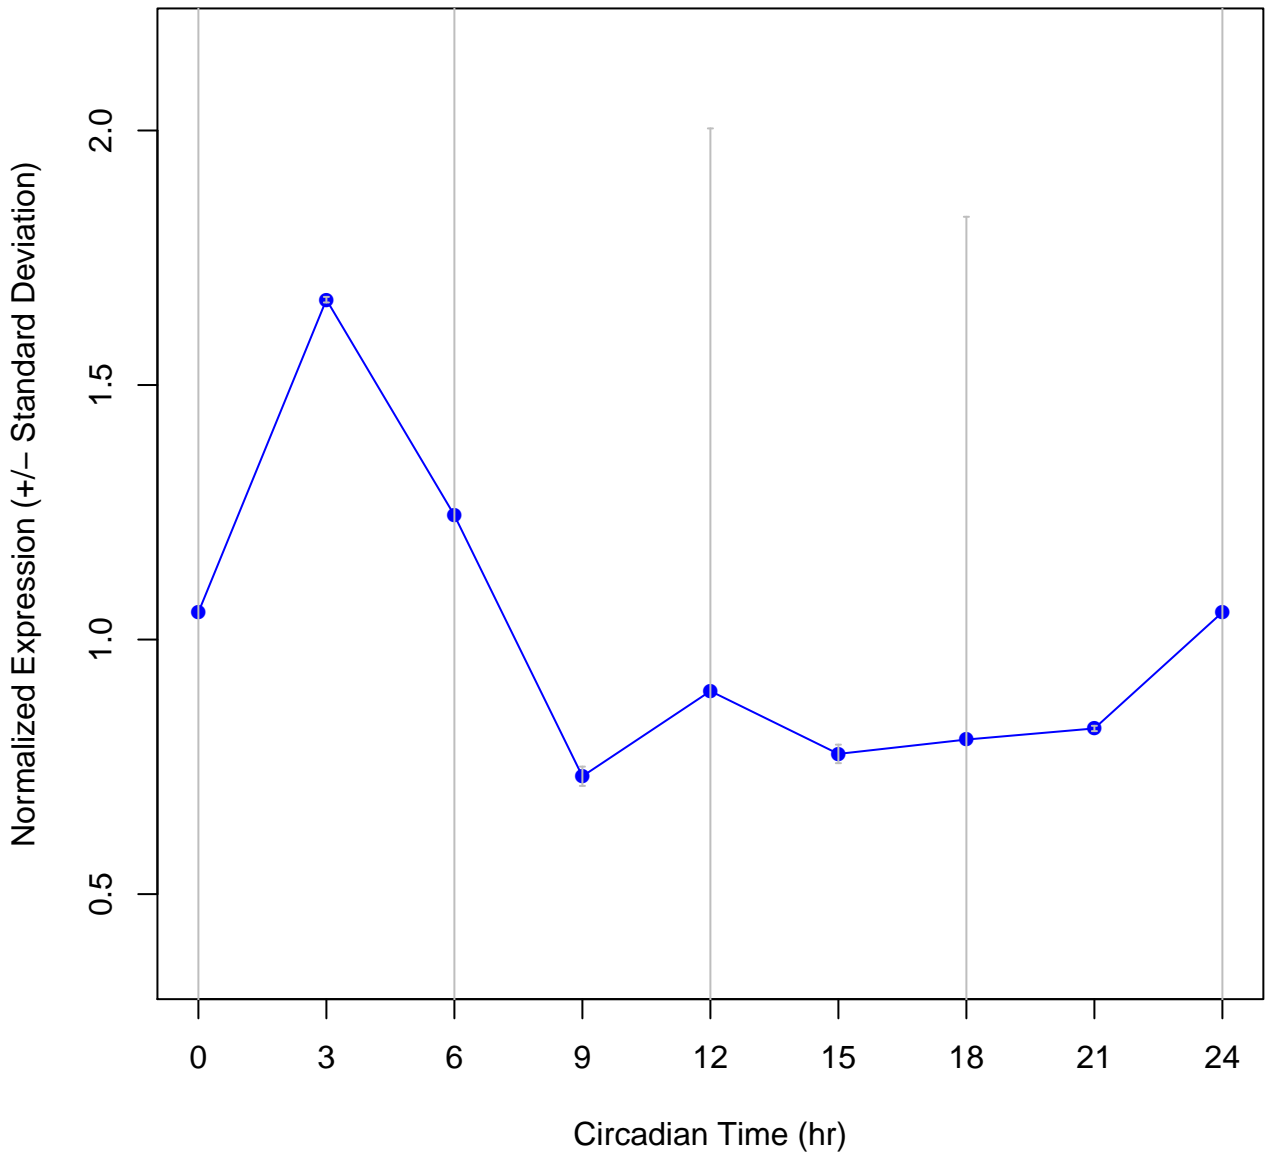

Supplement Figure 5 grin2a

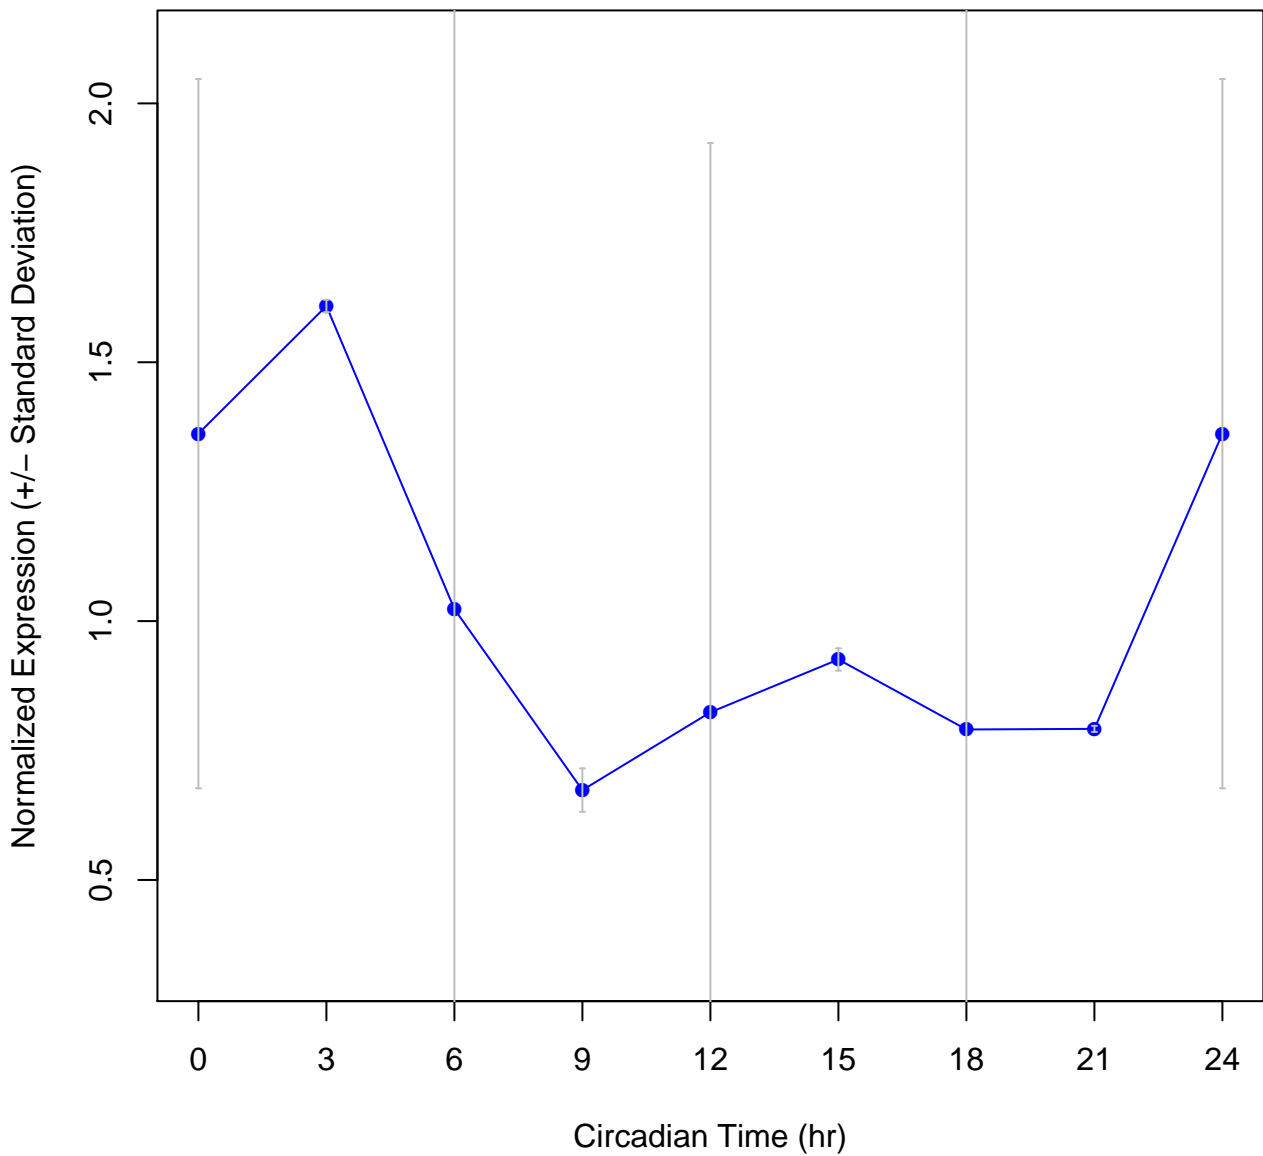

**Supplement Figure 5 hdac3**

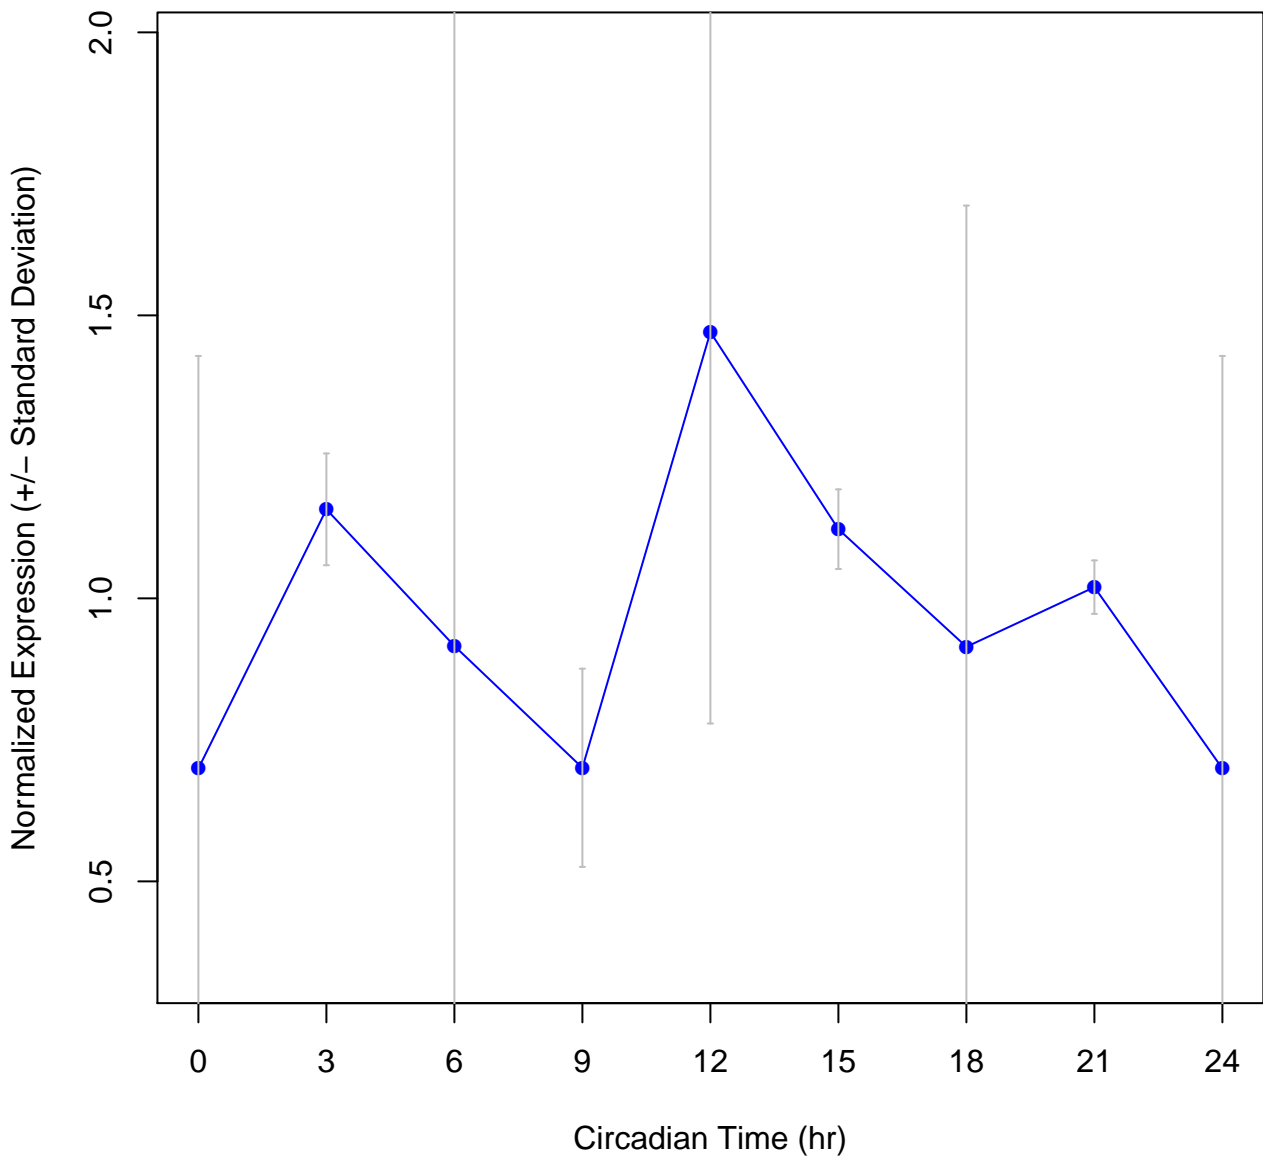



Supplement Figure 5 hmox1

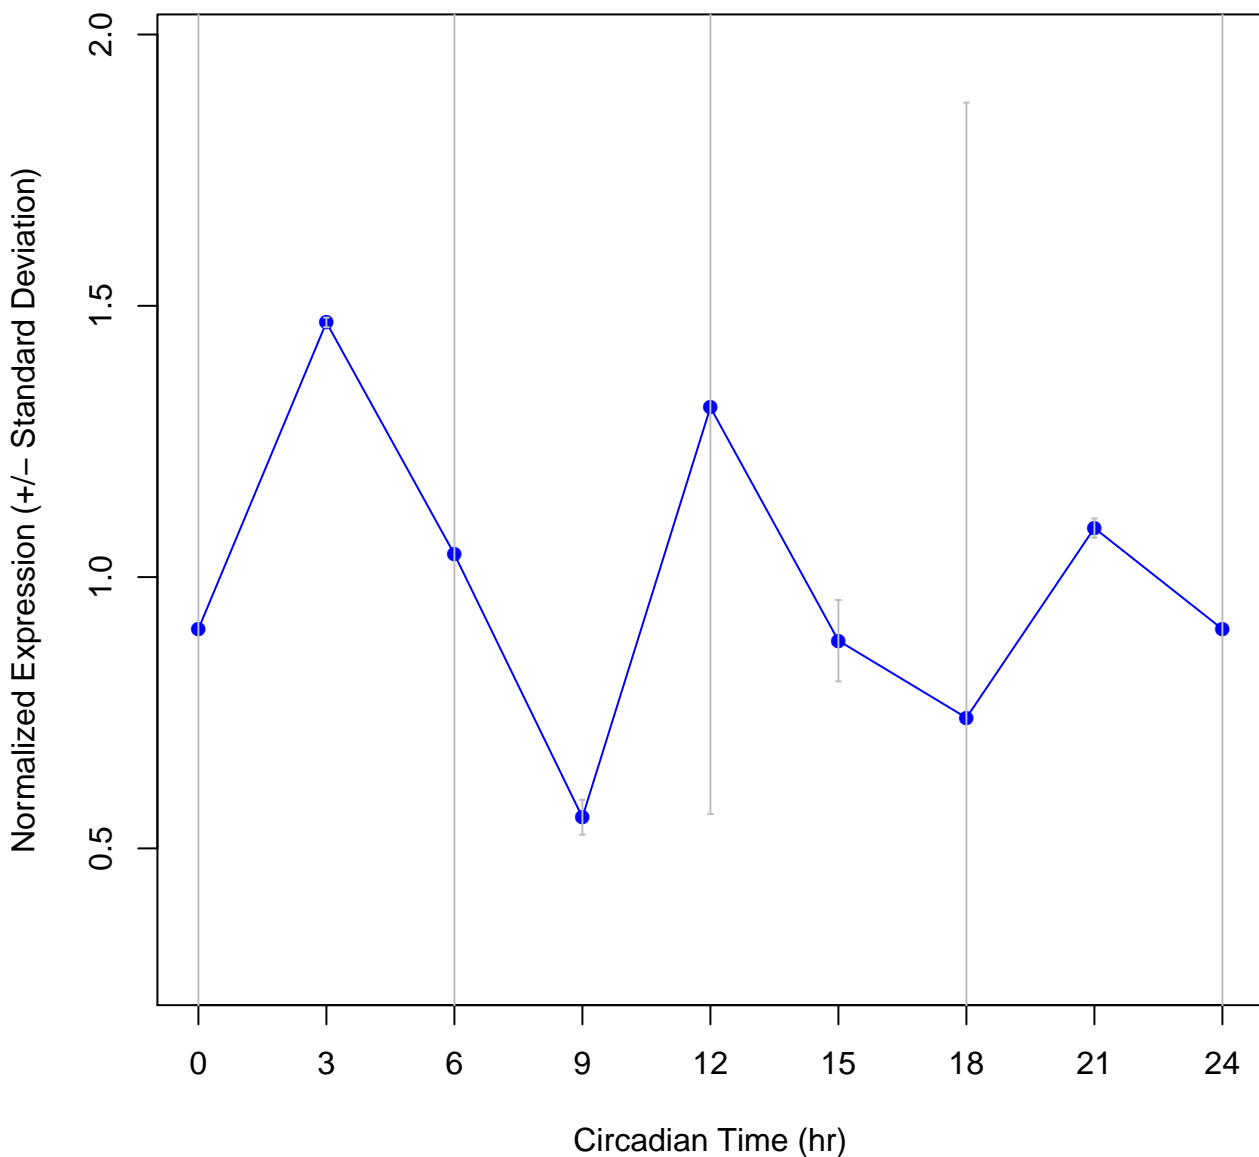

## Supplement Figure 5 hp

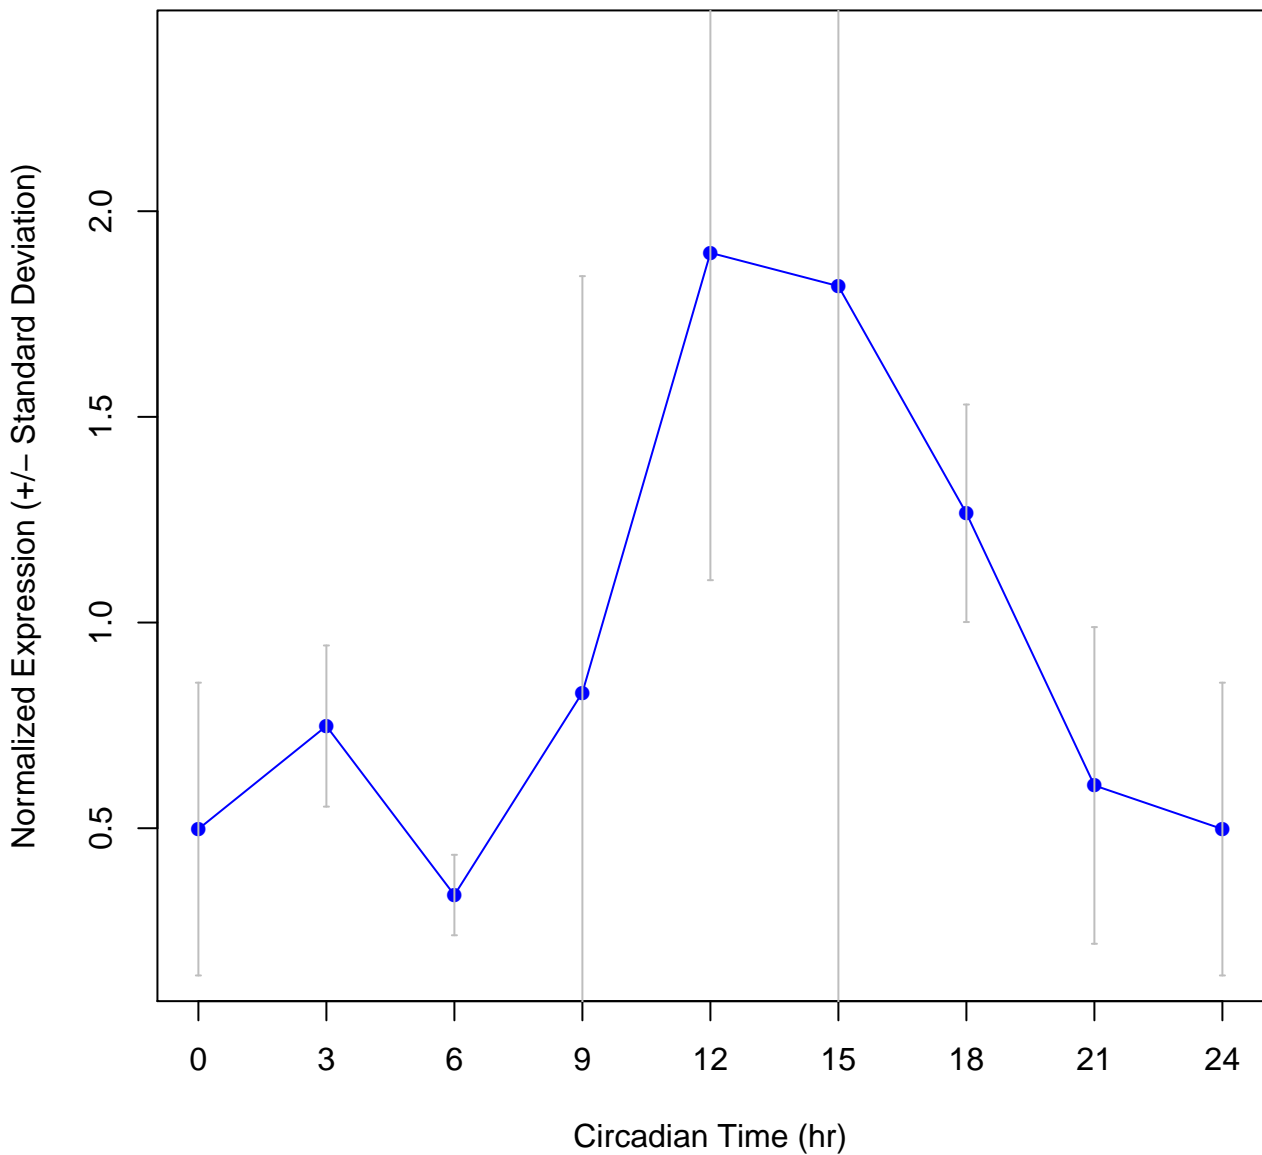

**Supplement Figure 5 hsp90aa1**

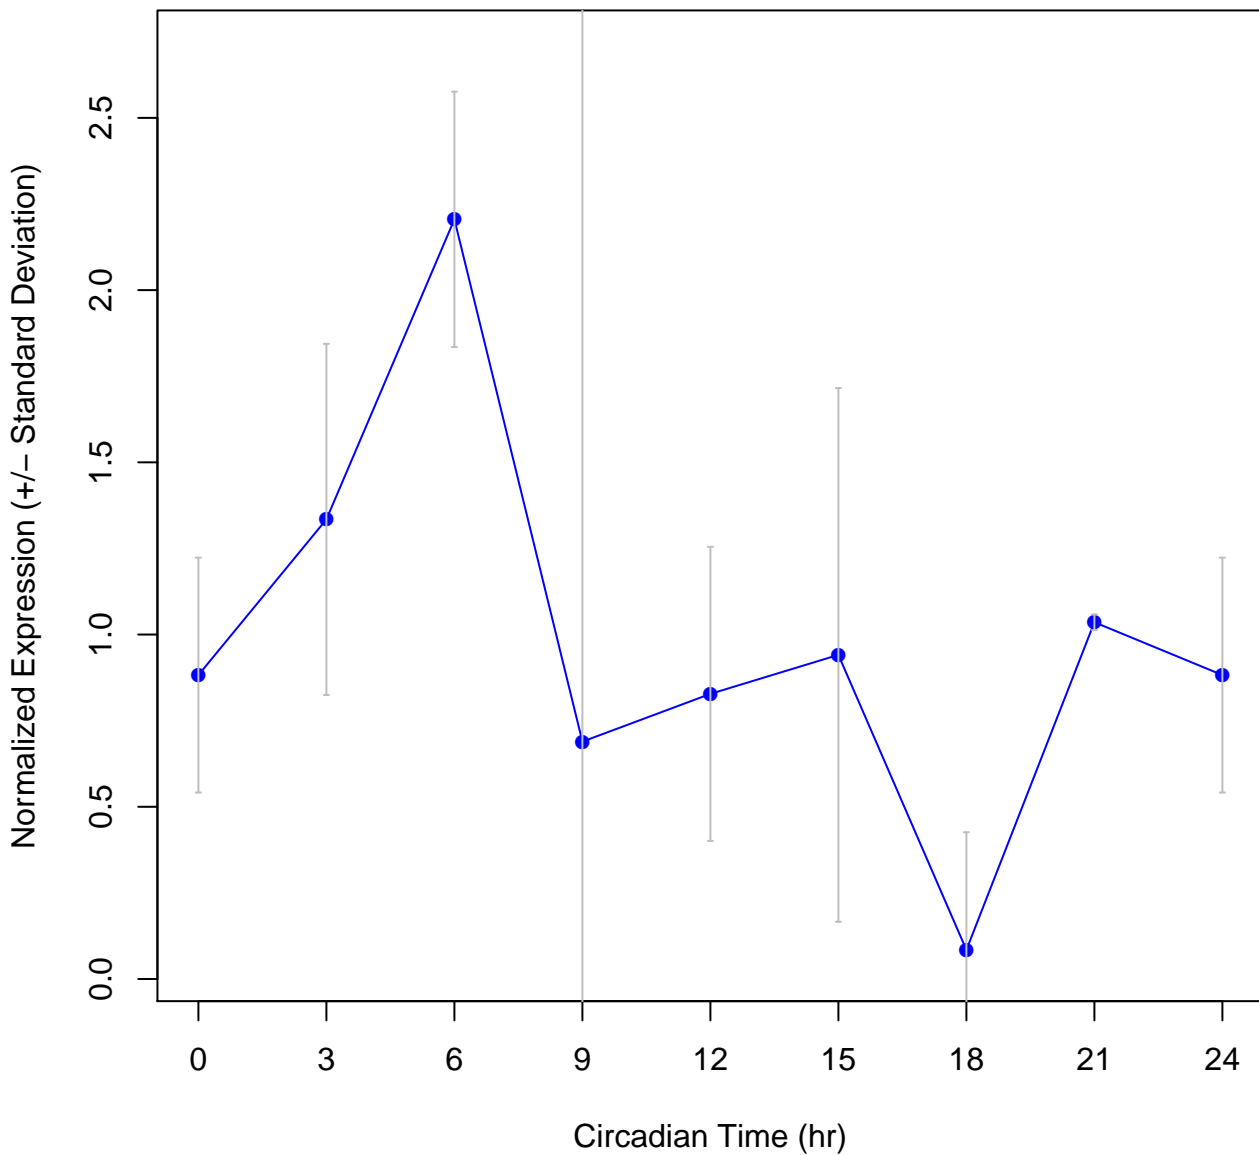

**Supplement Figure 5 hspa4**

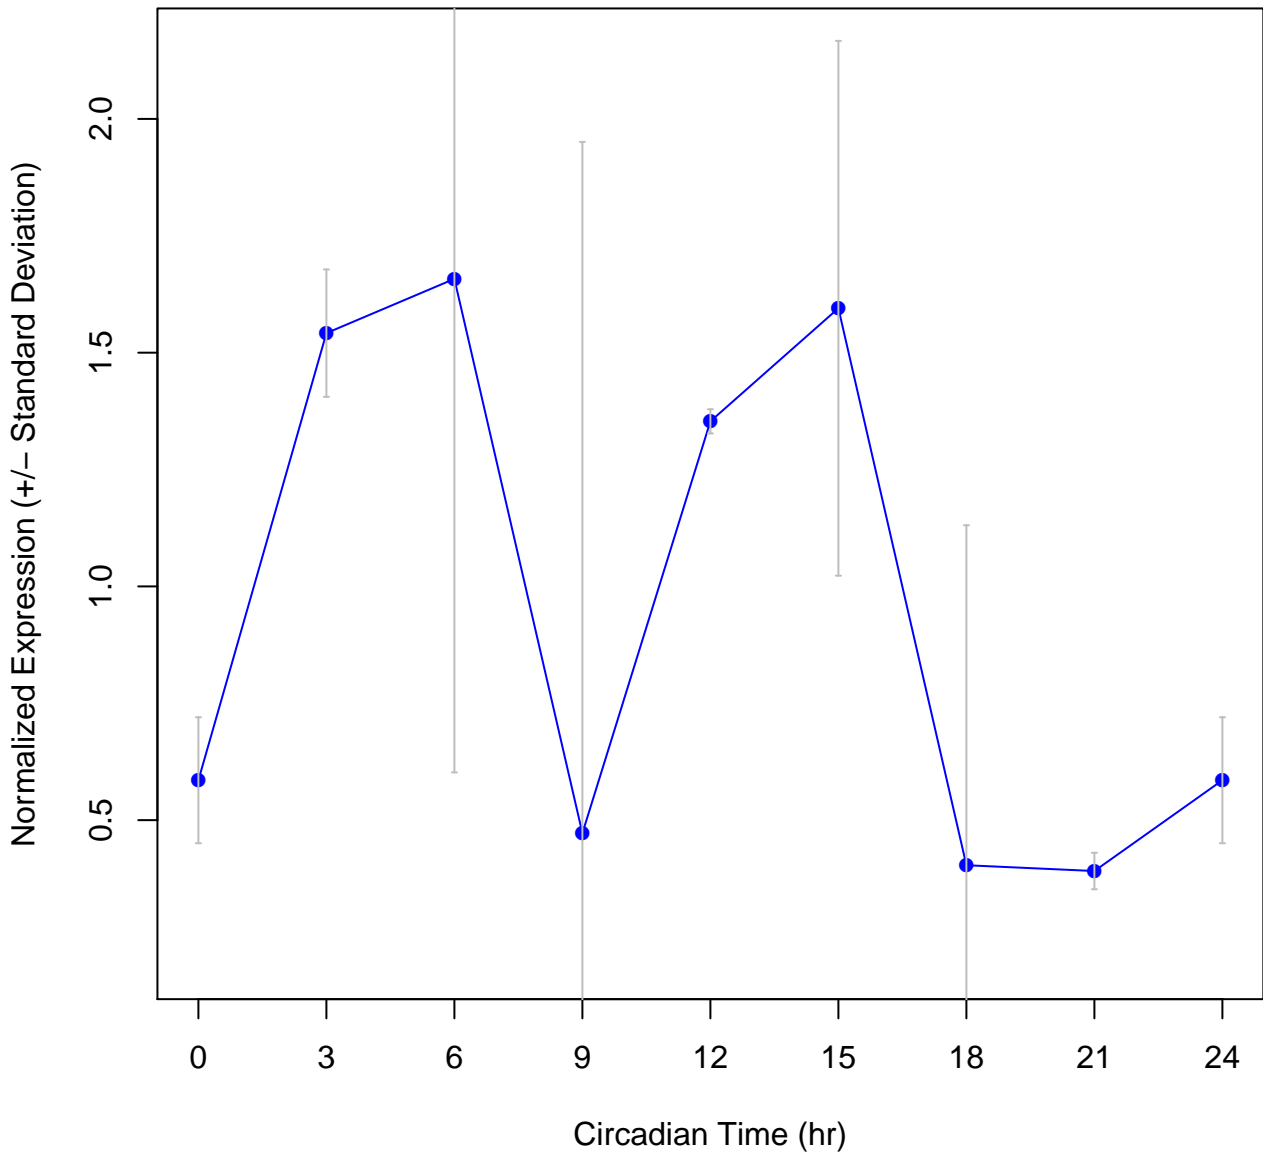

# Supplement Figure 5 hunk

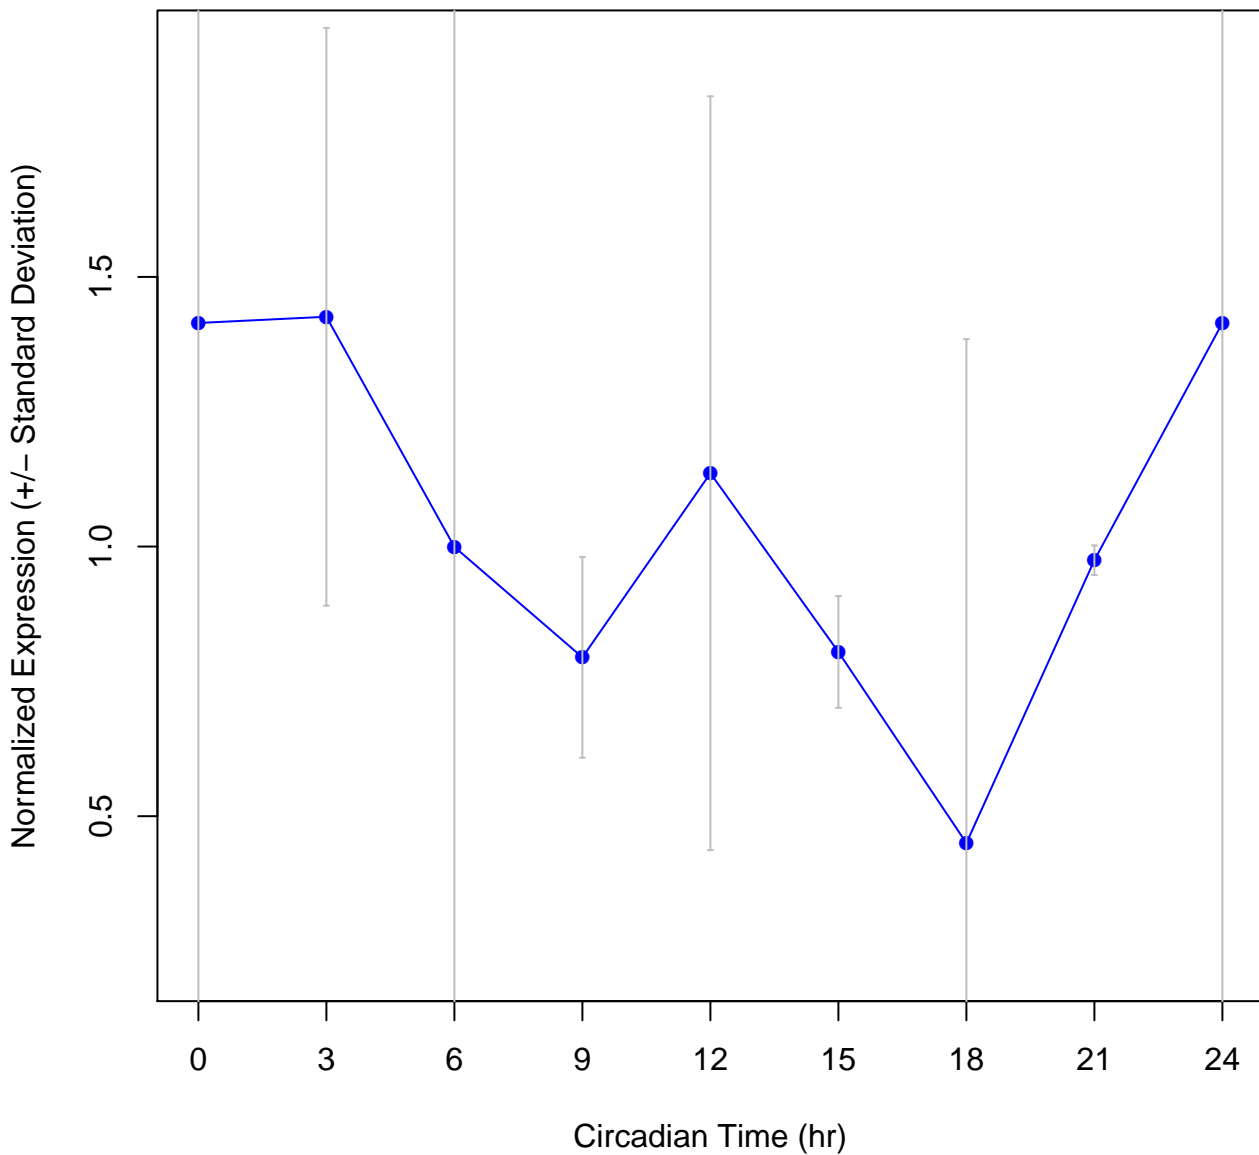

Supplement Figure 5 igf1

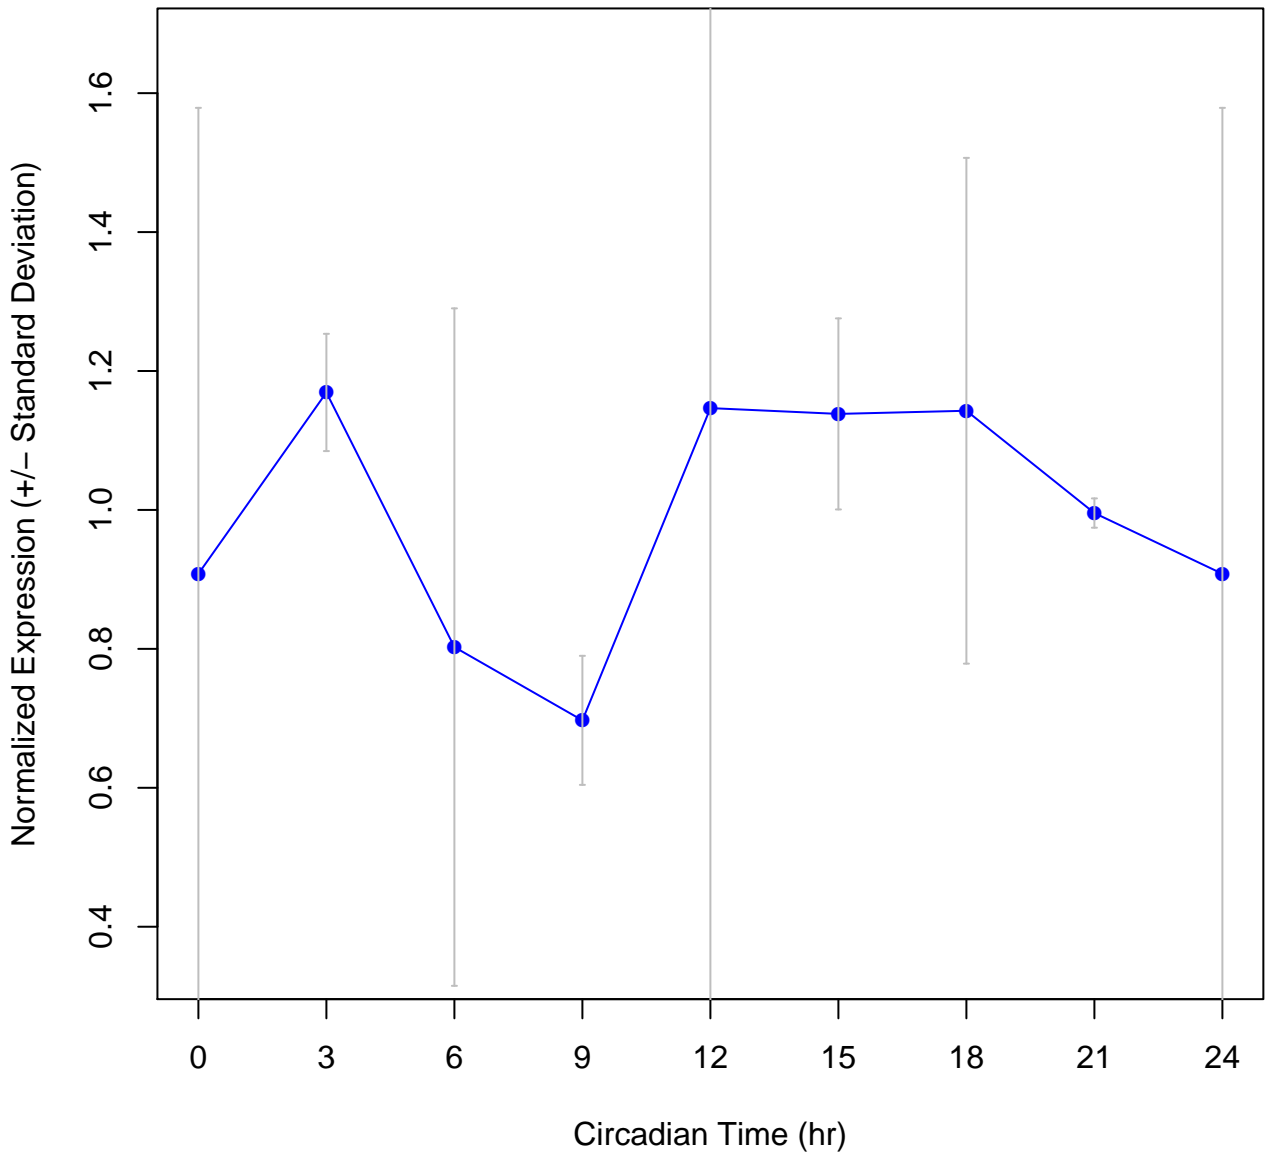

### Supplement Figure 5 ints9

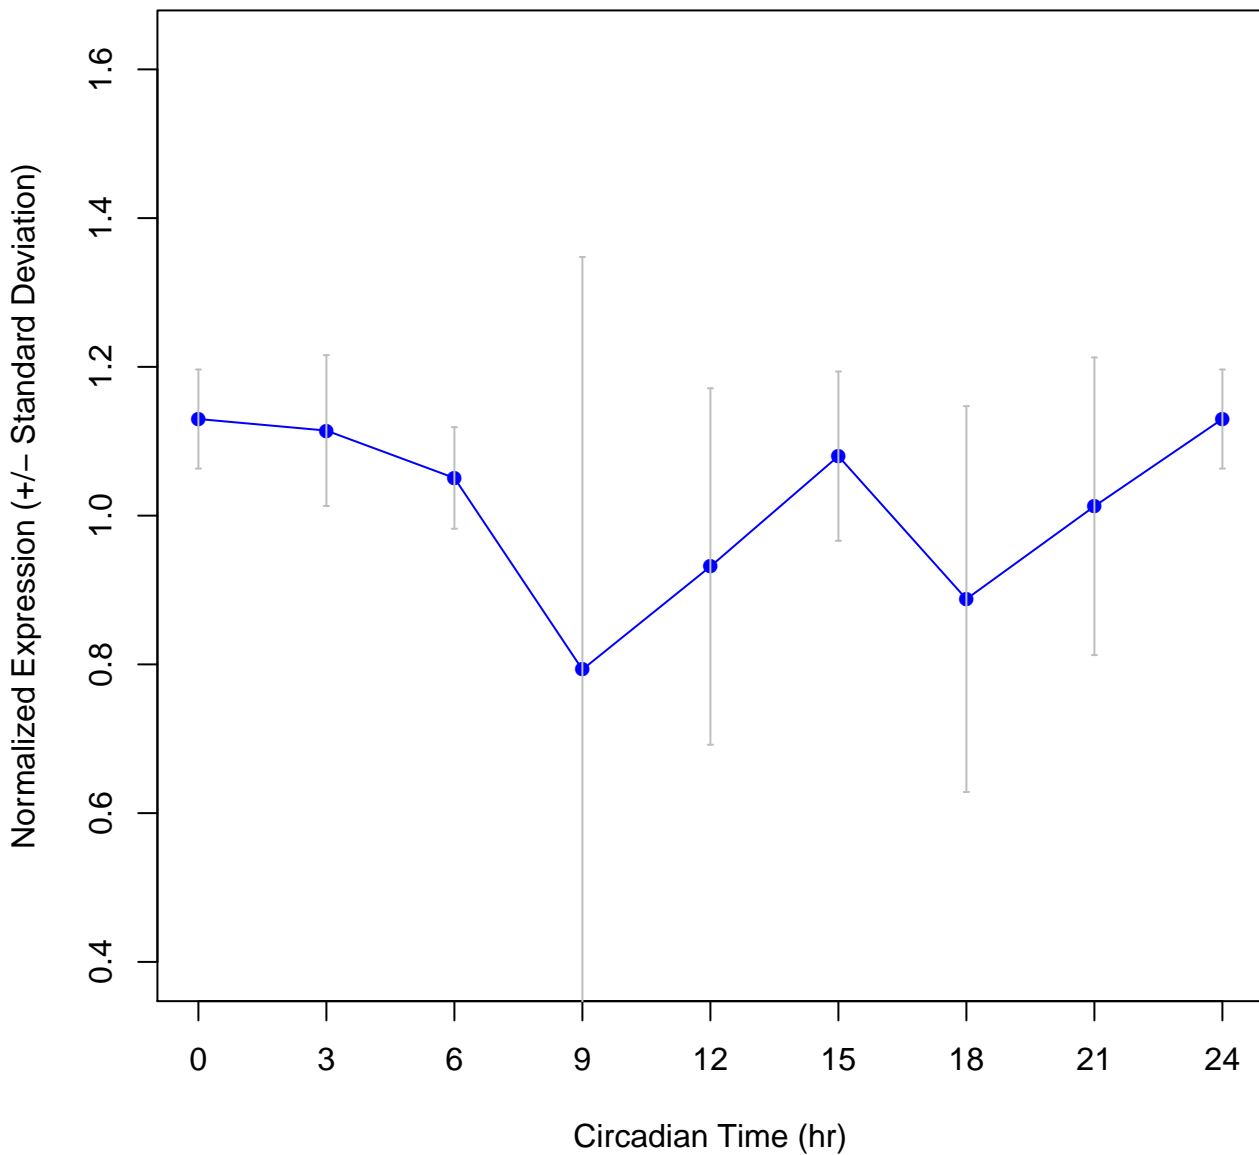

Supplement Figure 5 *irs1*

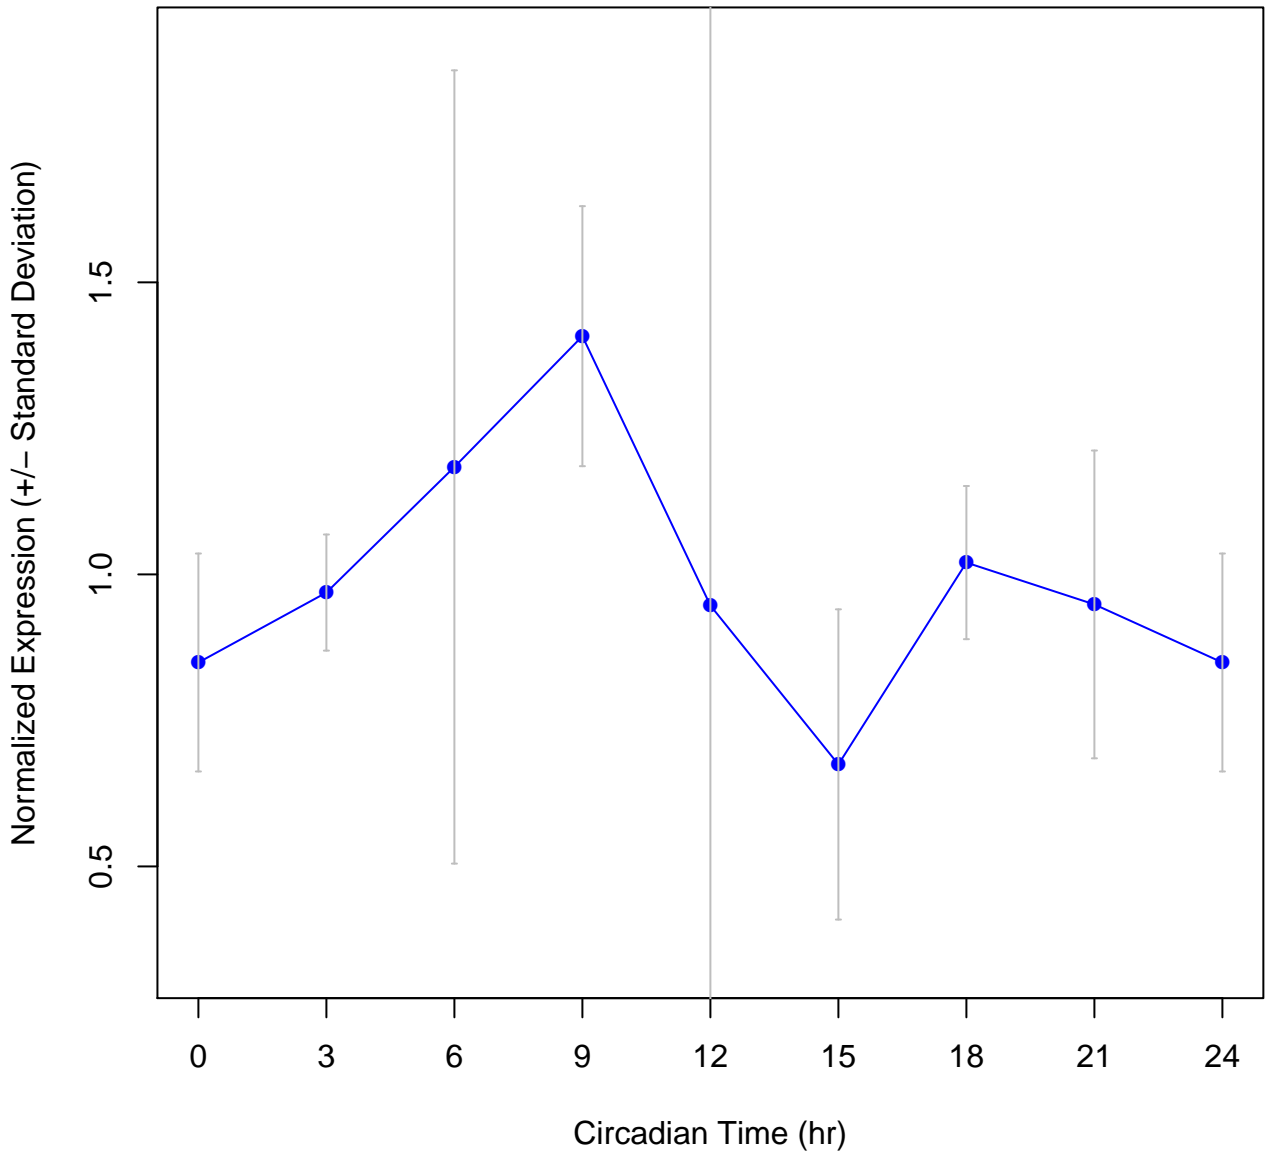



Supplement Figure 5 *irs2*

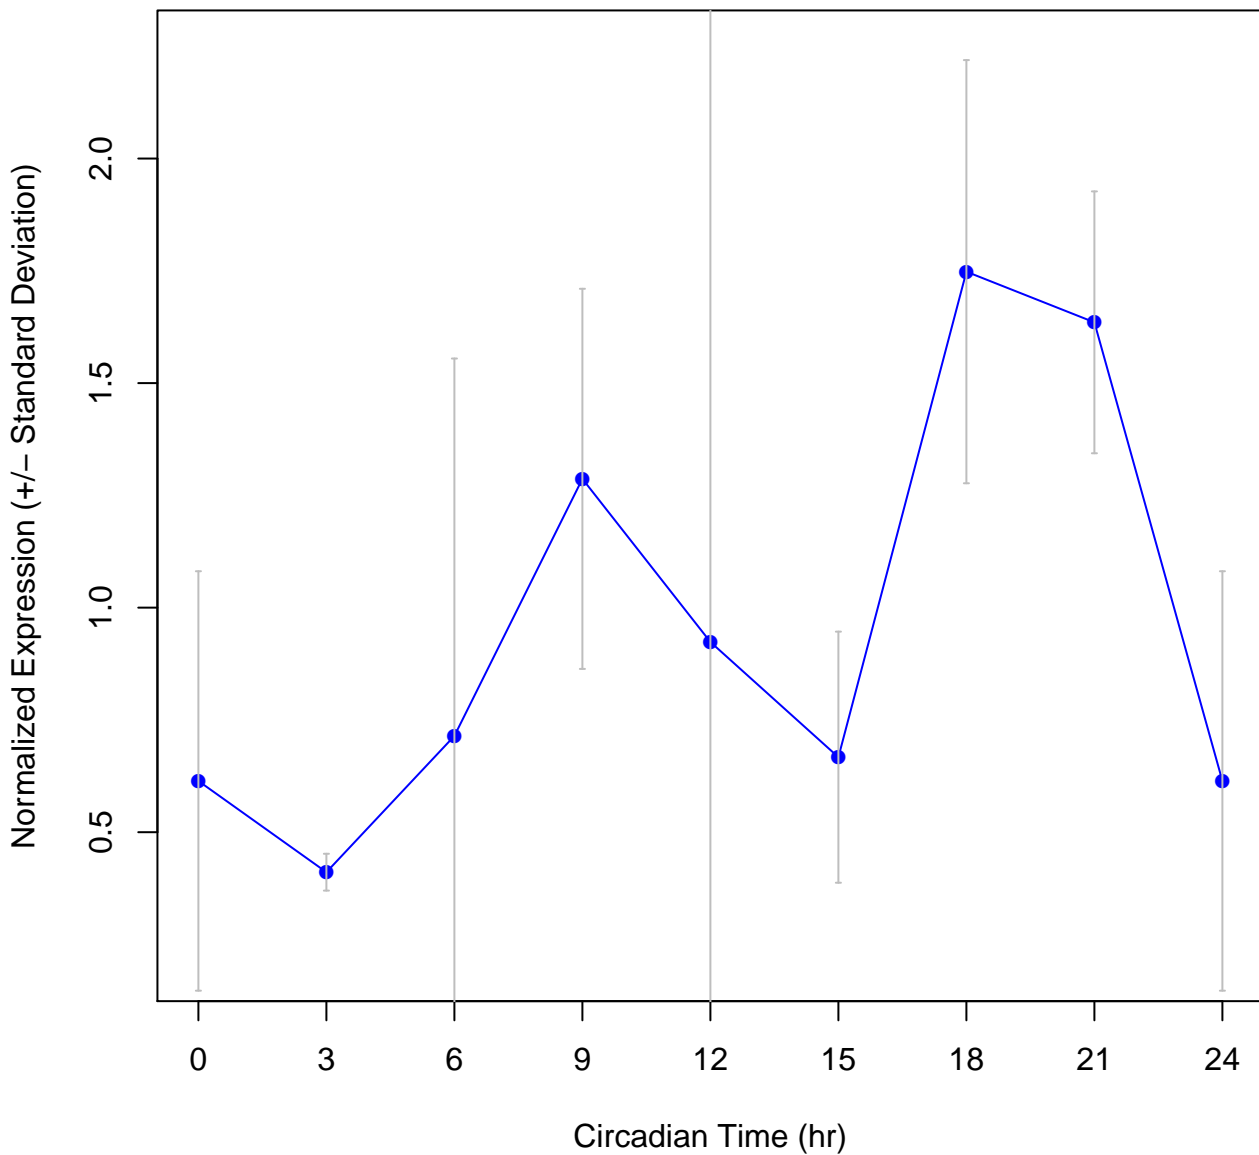

Supplement Figure 5 itpr1

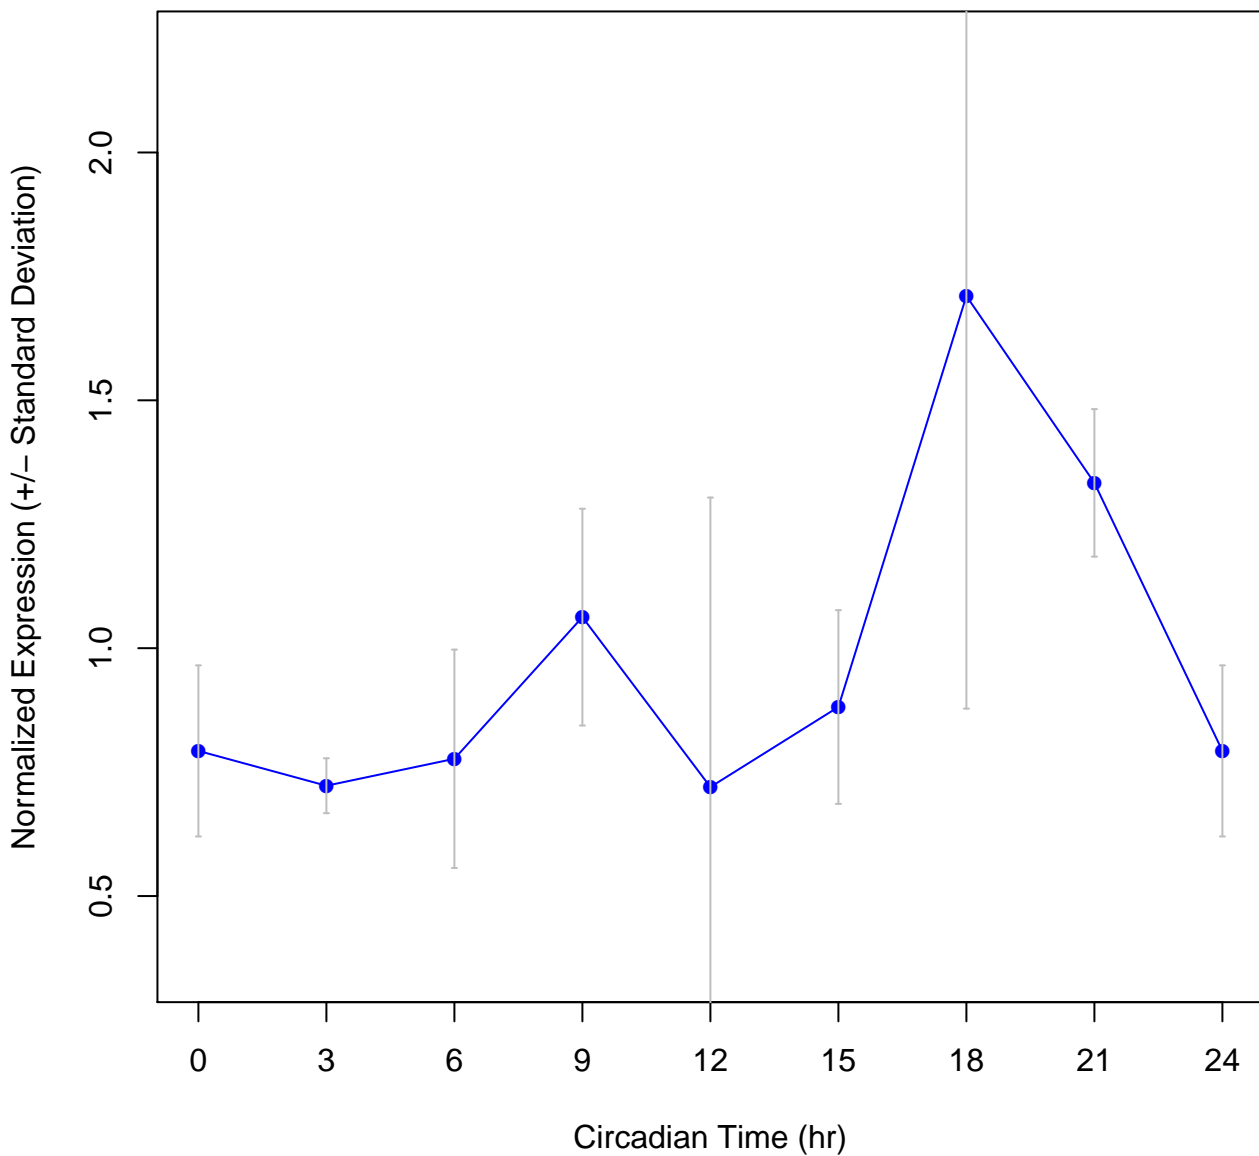

**Supplement Figure 5 itpr3**

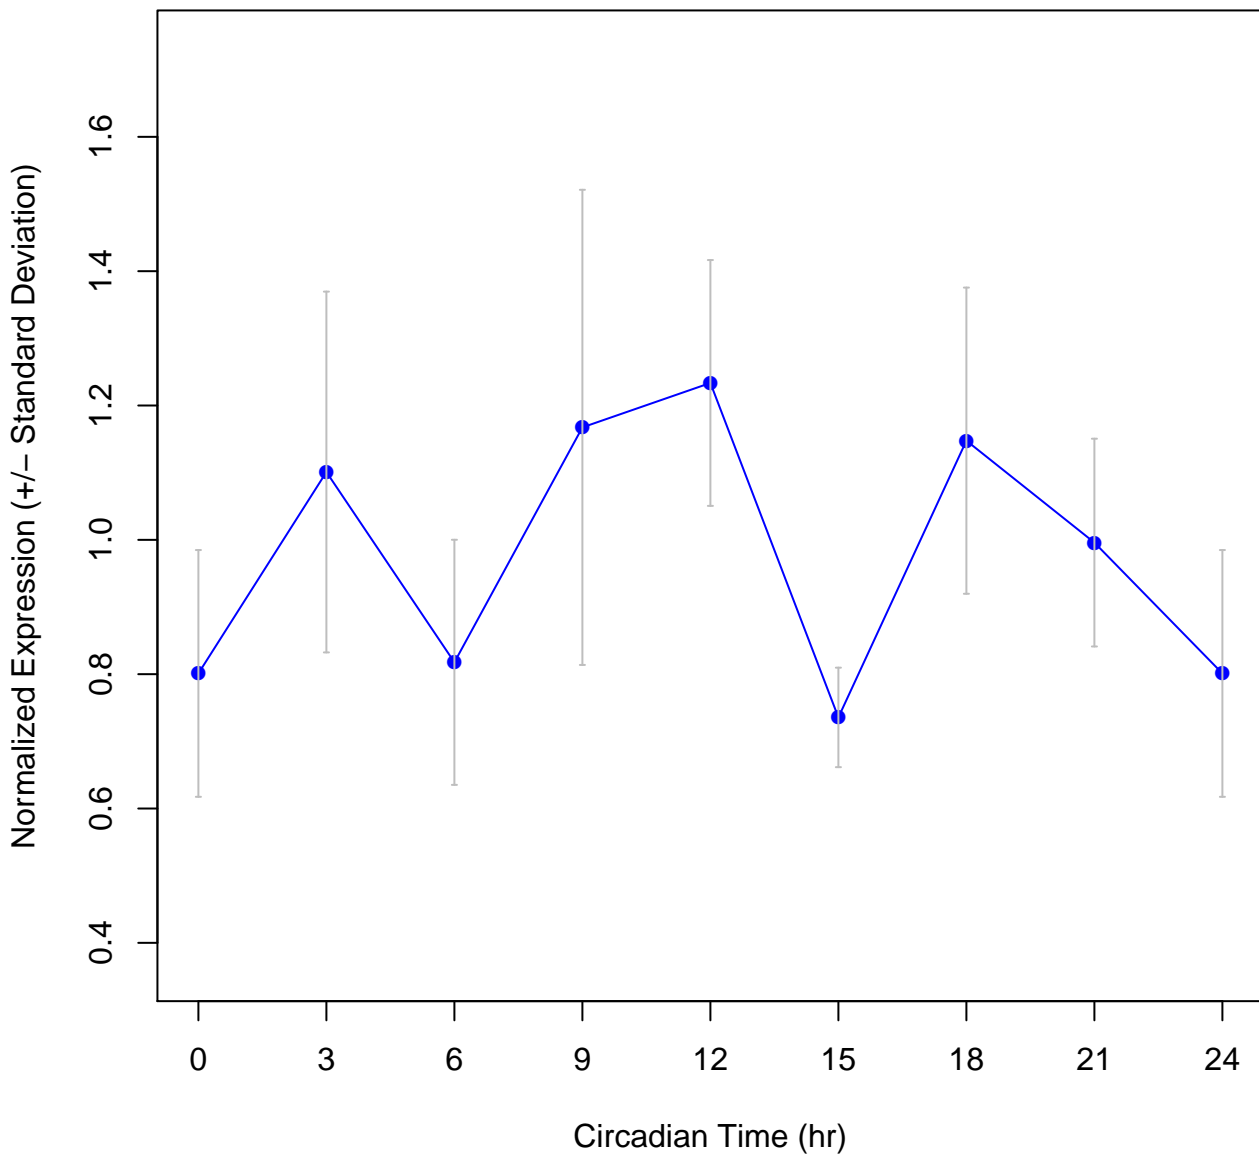

Supplement Figure 5 jun\_1

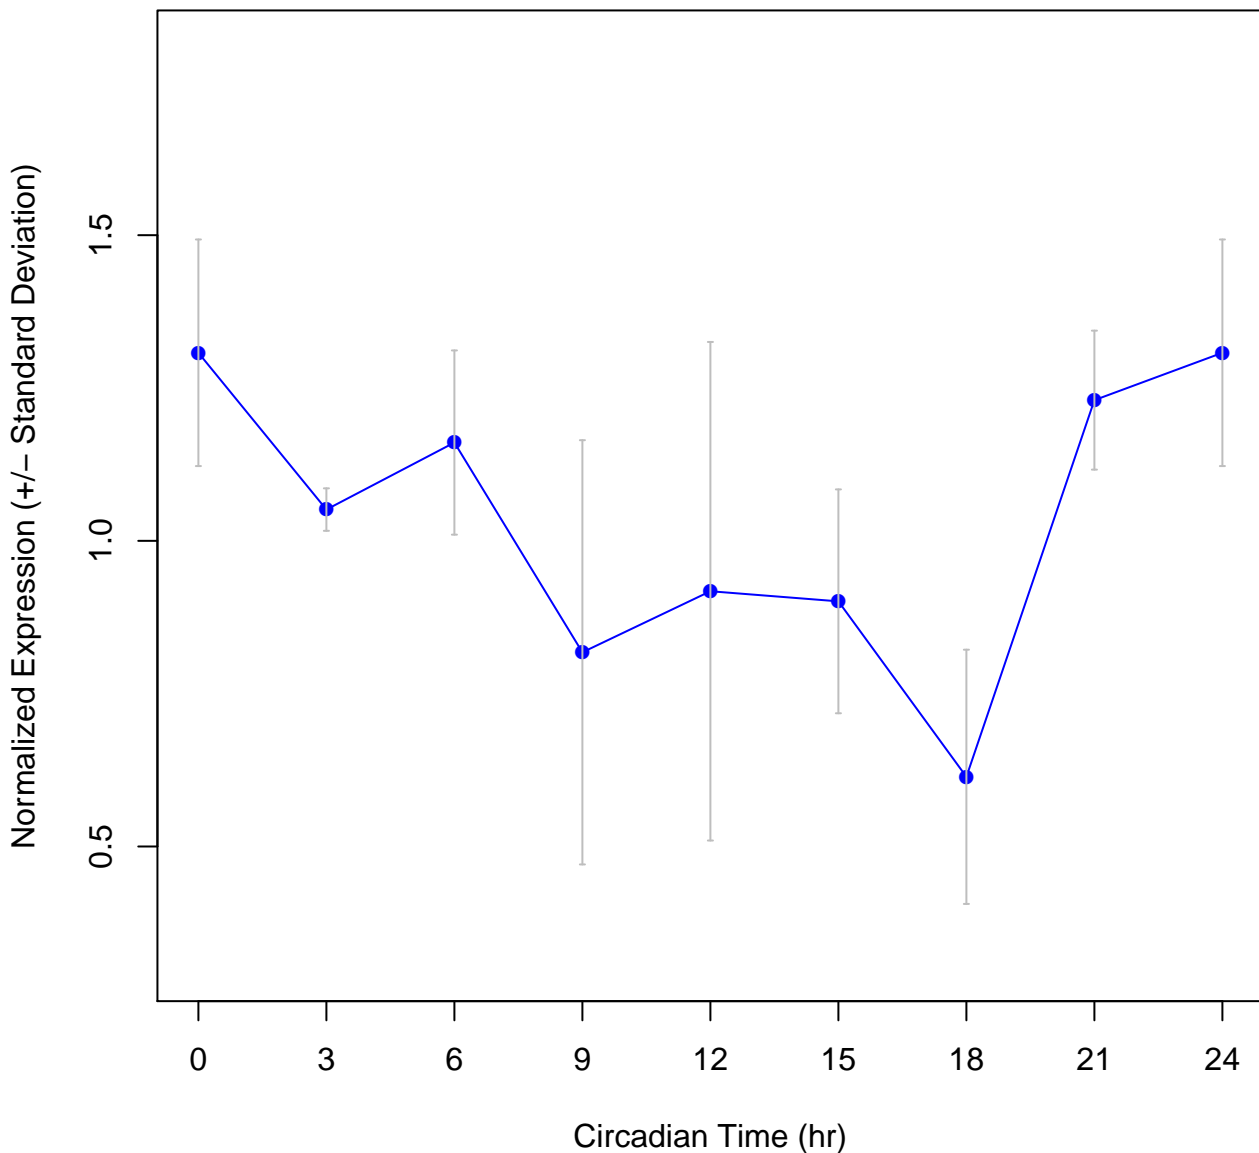

Supplement Figure 5 jun\_2

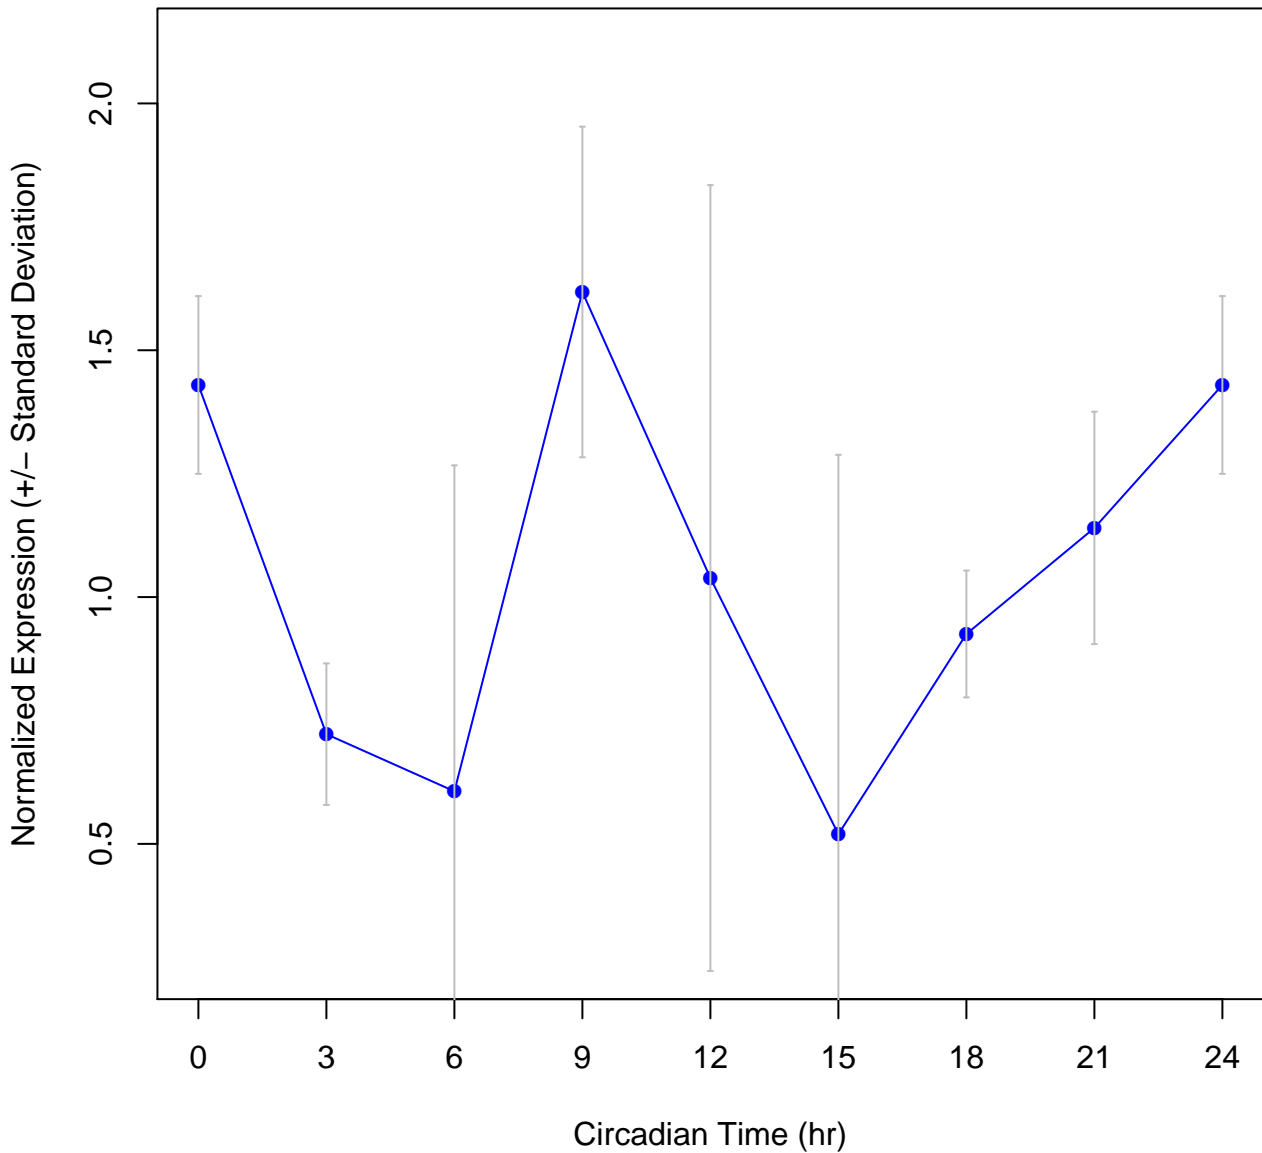

**Supplement Figure 5 kat2b**

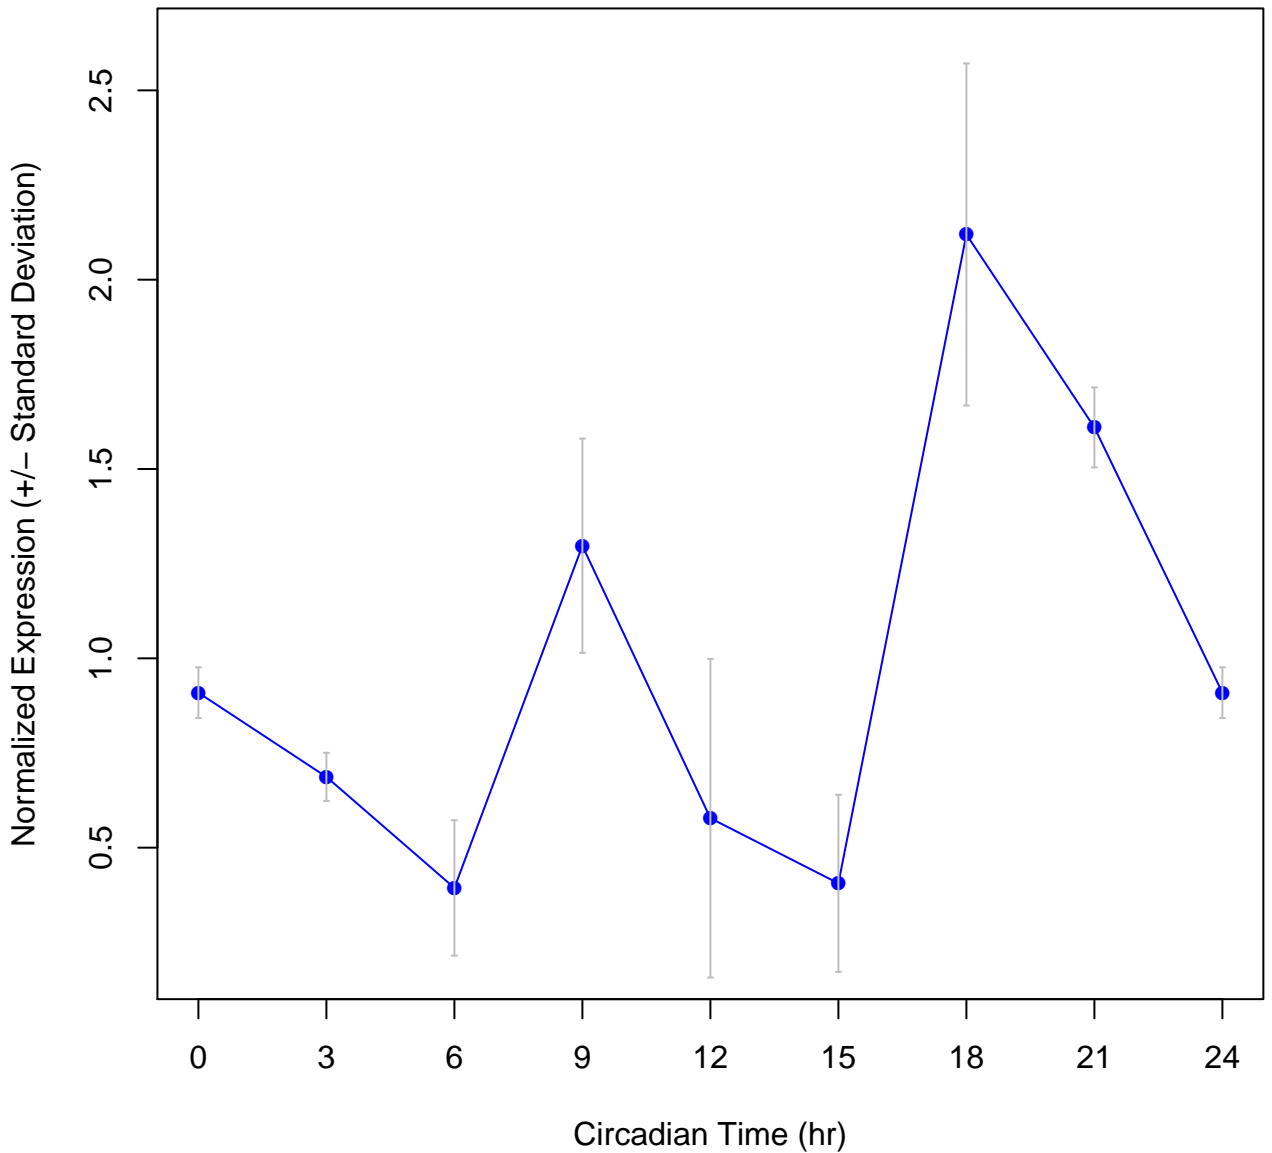

## Supplement Figure 5 kifc1

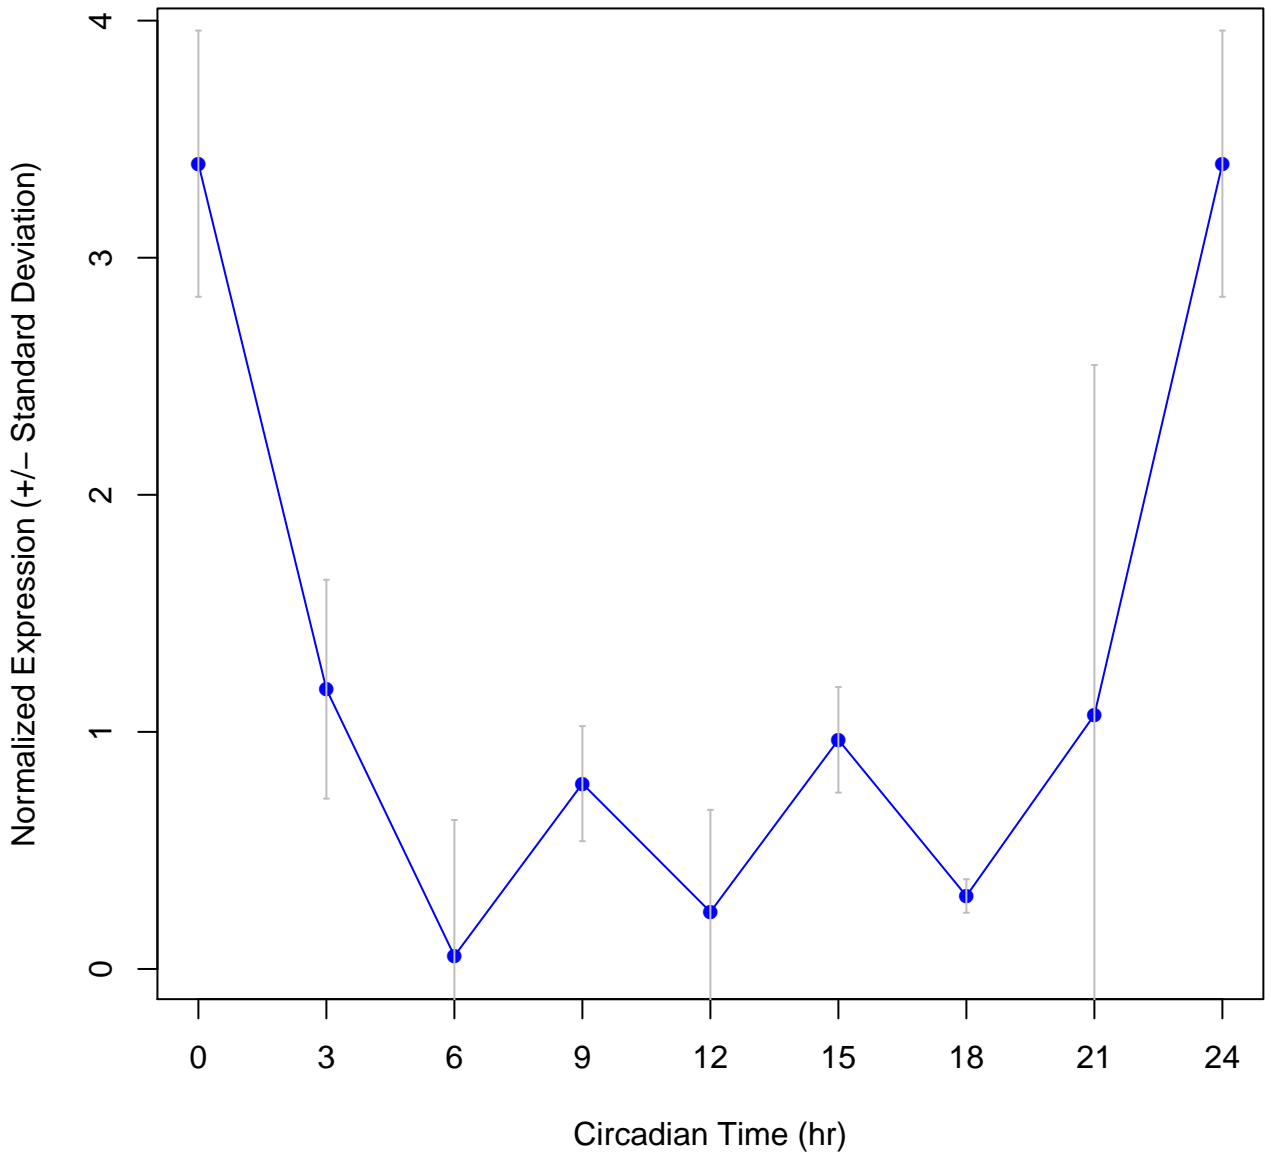

## Supplement Figure 5 kit

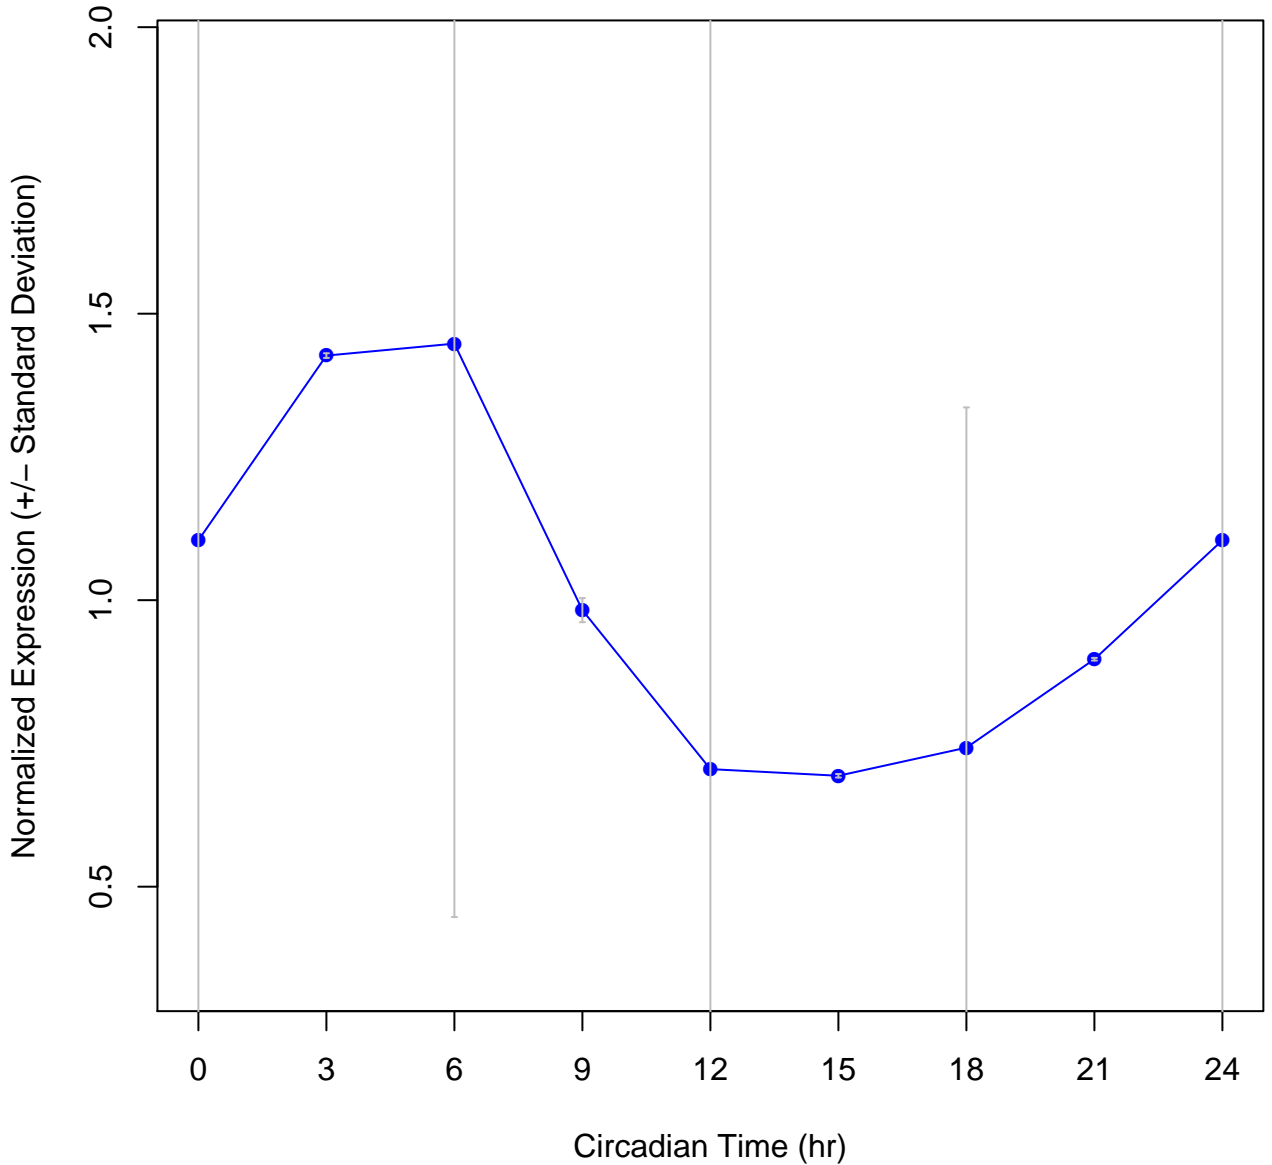



## Supplement Figure 5 klf10

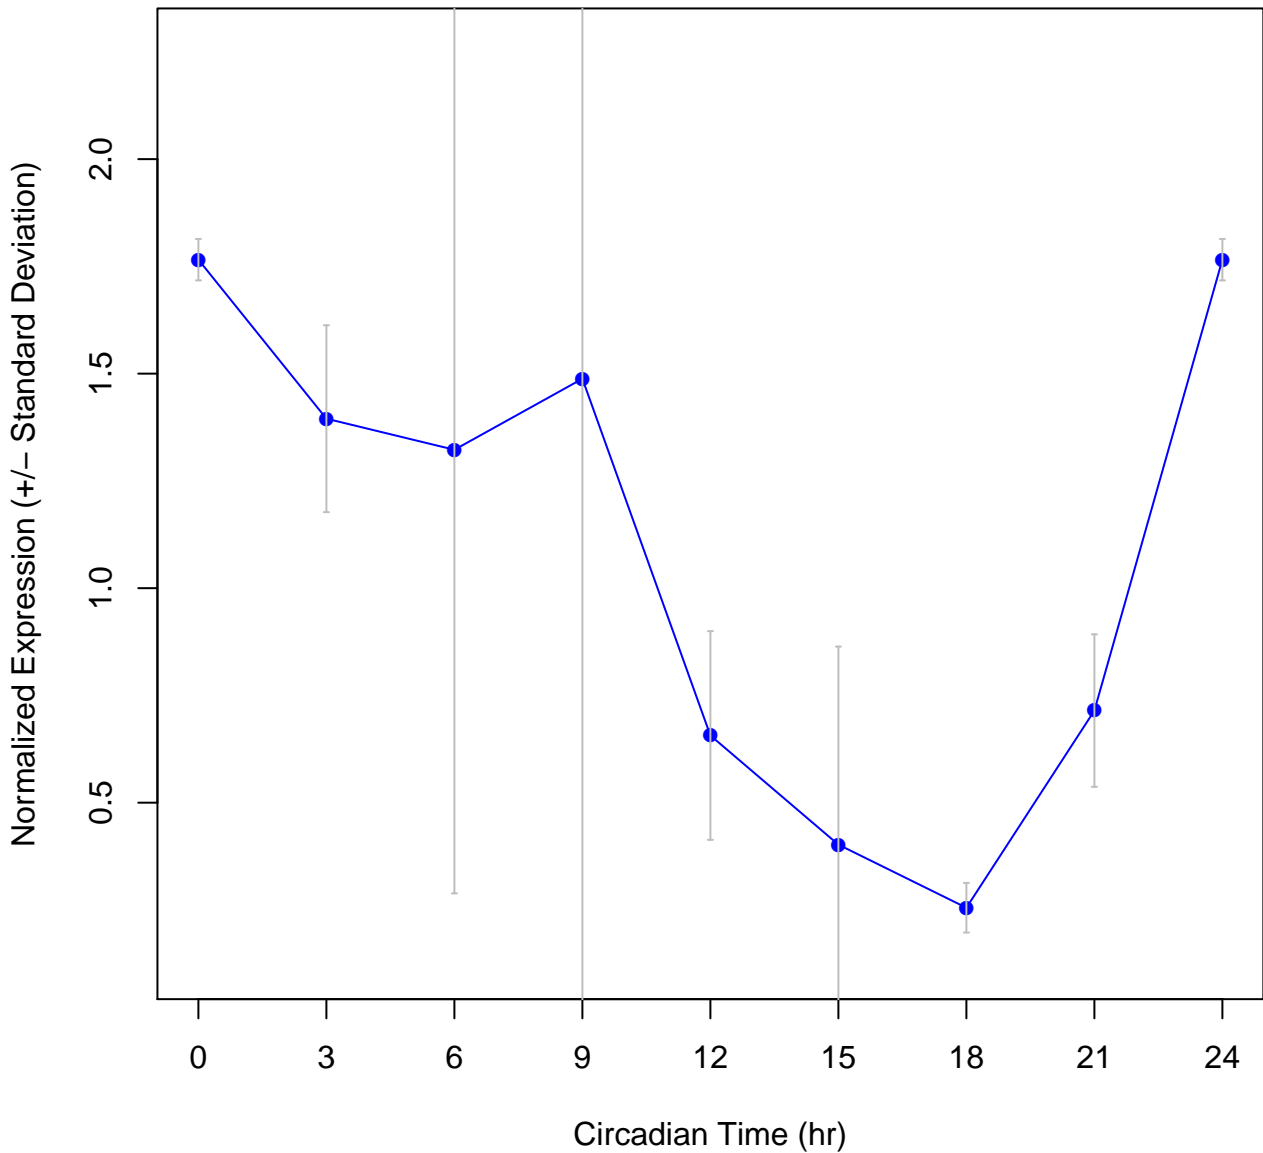

**Supplement Figure 5 klh138**

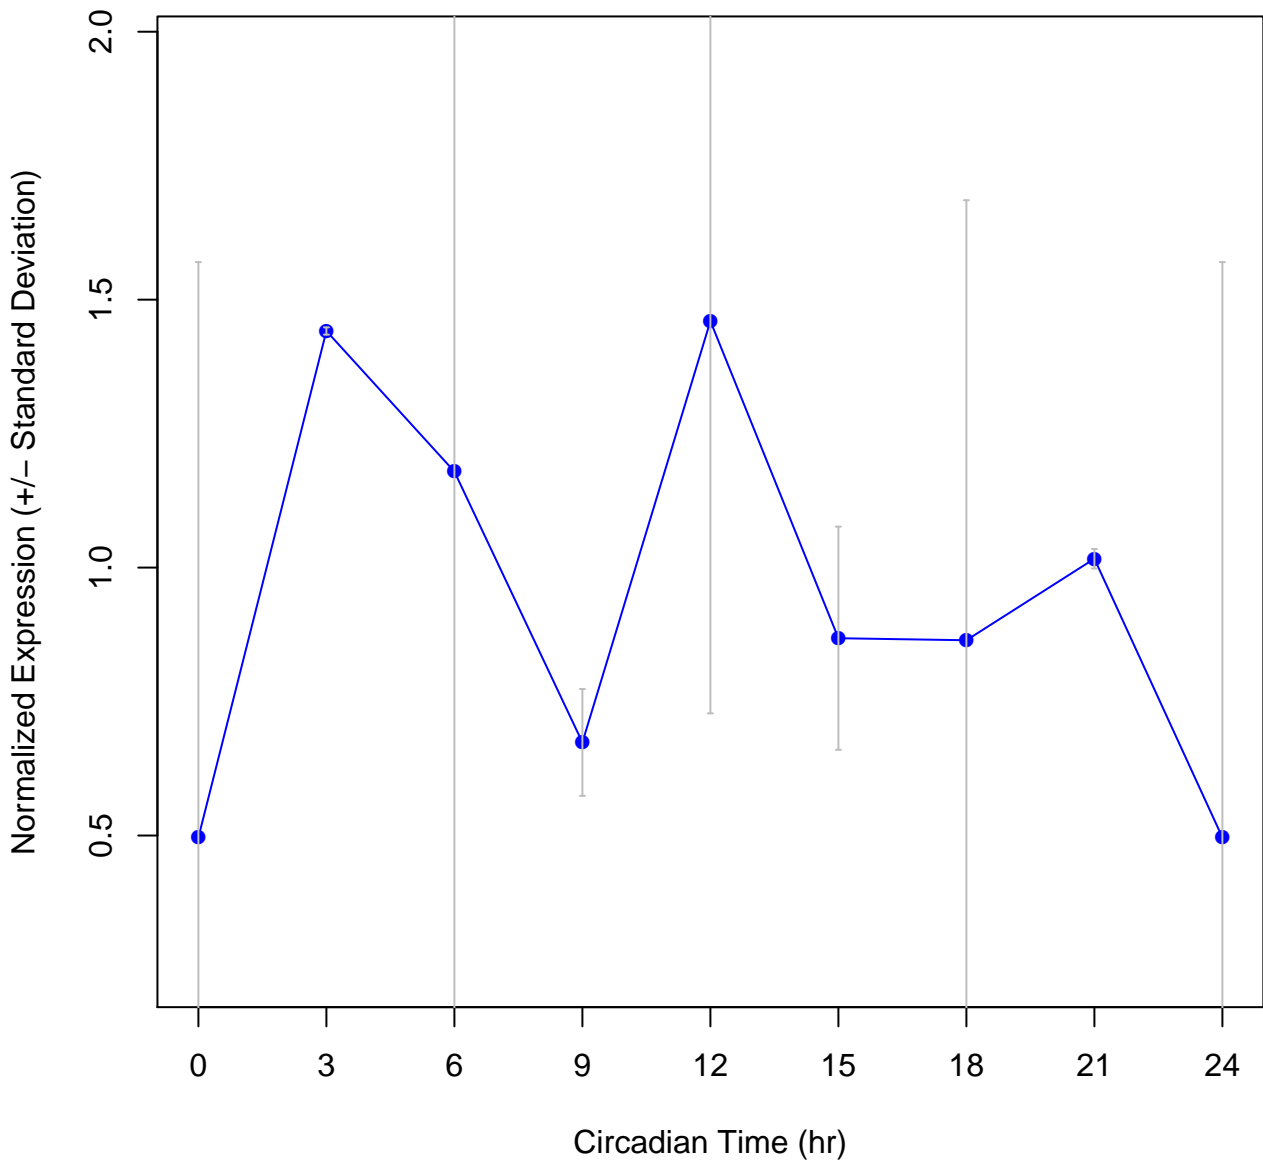

Supplement Figure 5 kmt2a

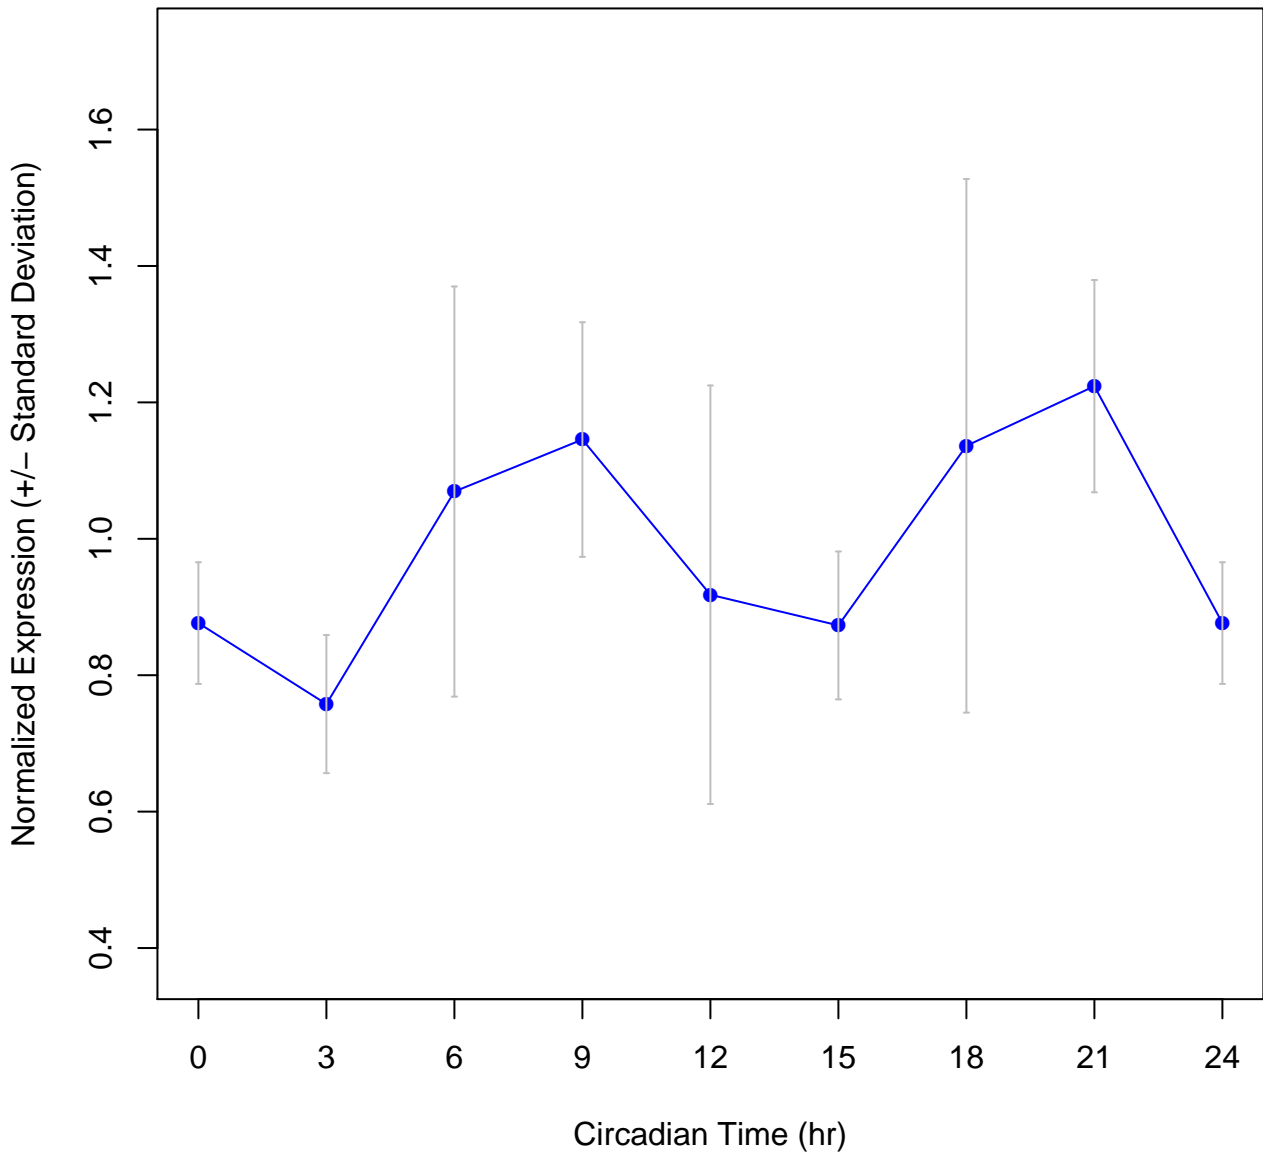

Supplement Figure 5 kpna2

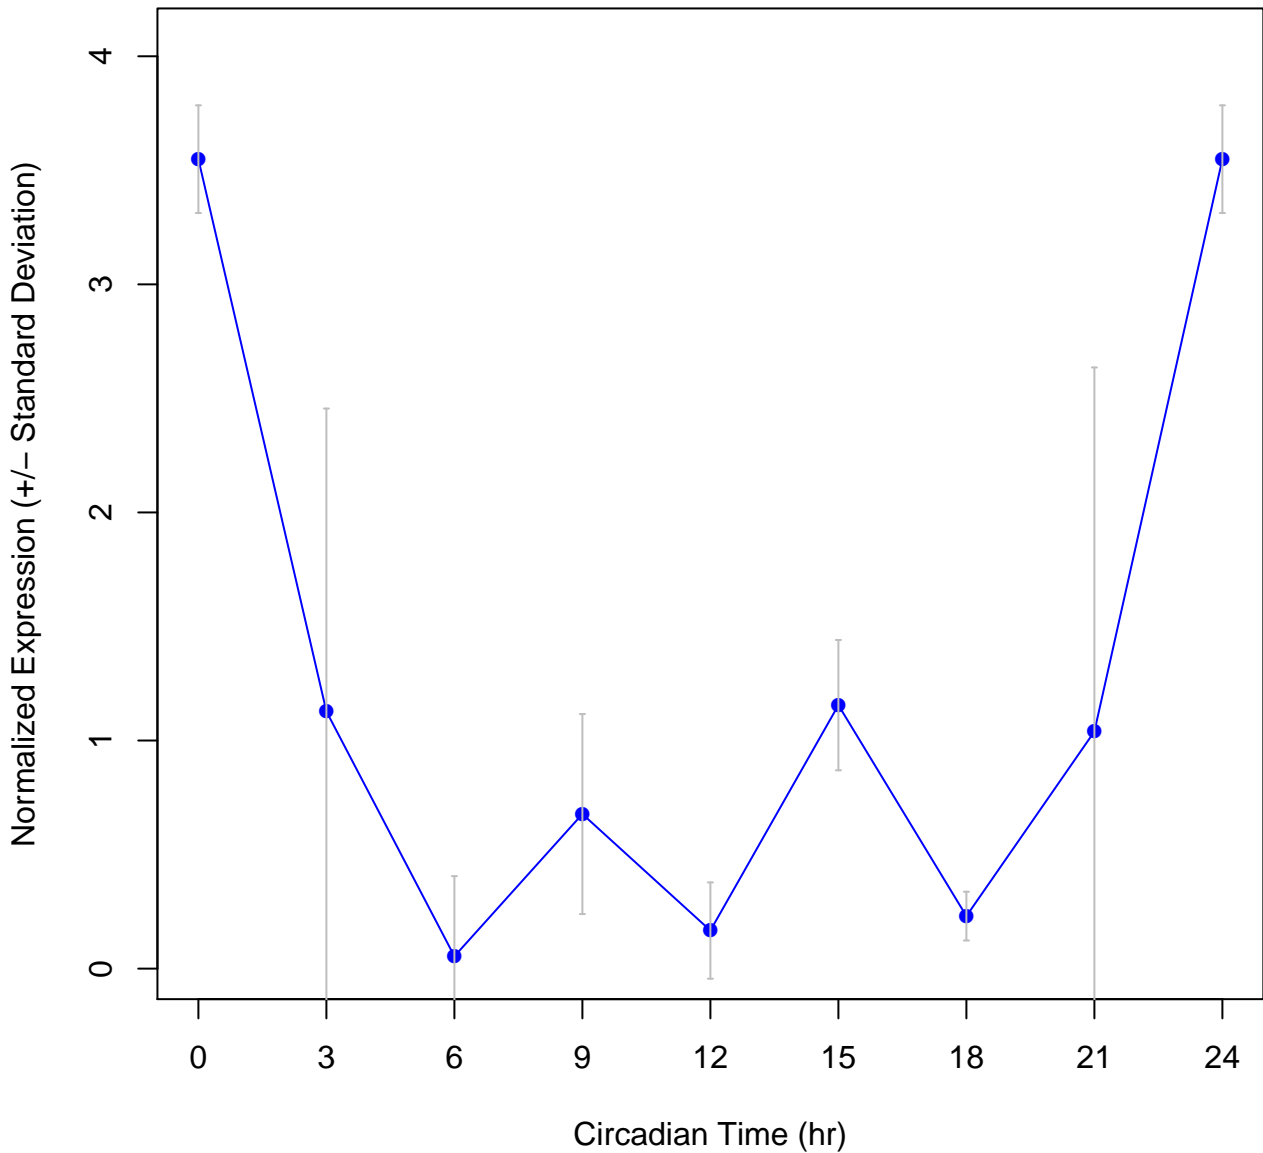

**Supplement Figure 5 lcp2**

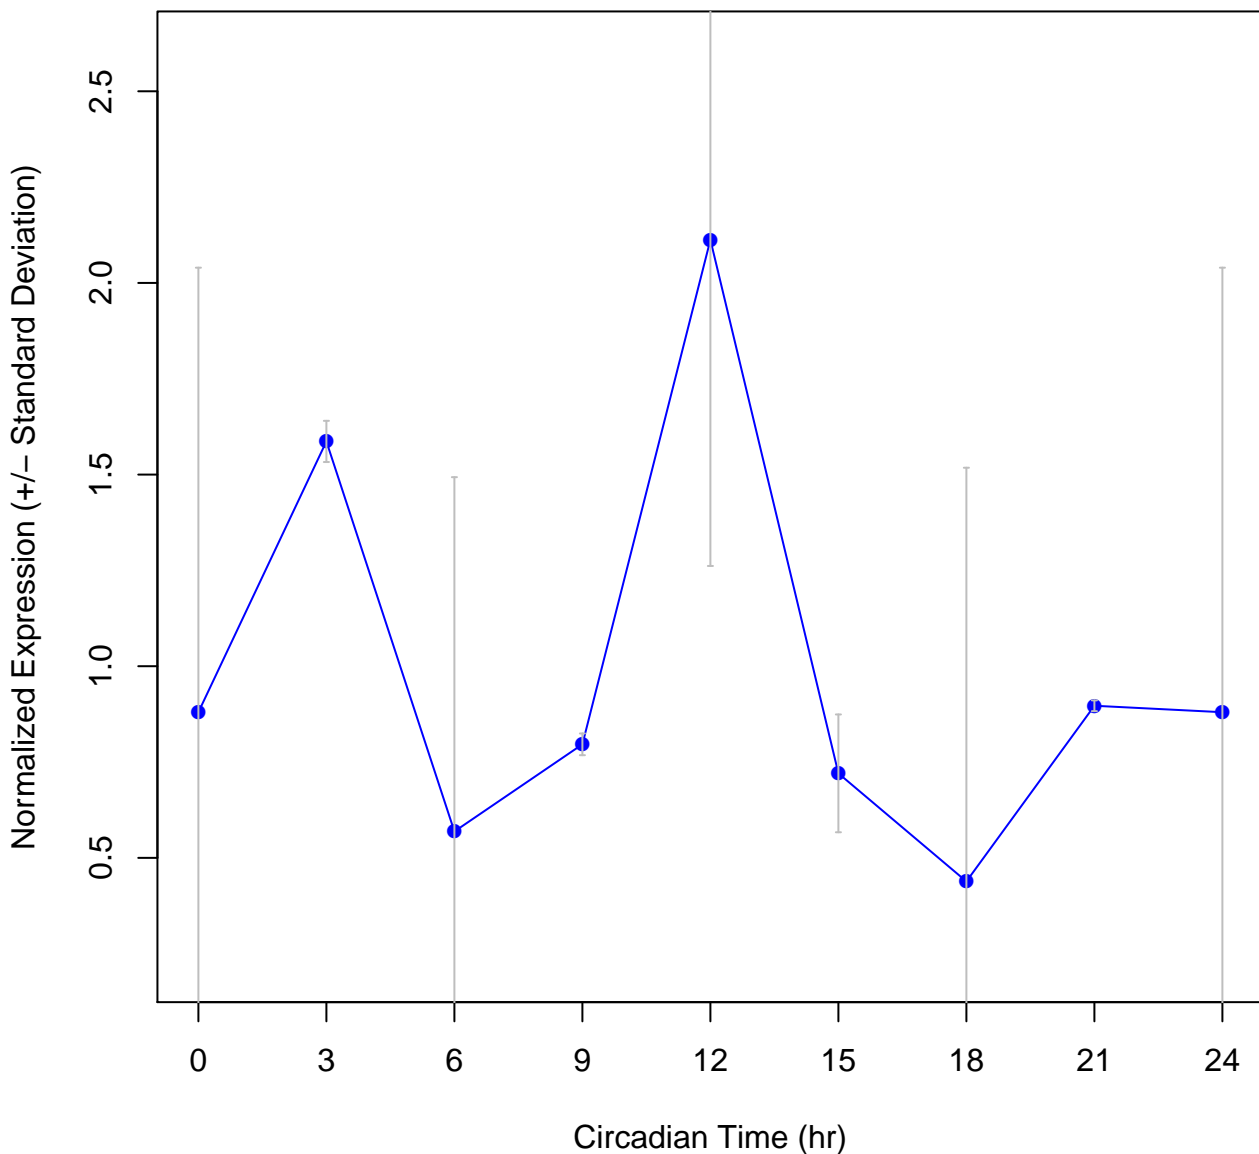

Supplement Figure 5 Ikb1

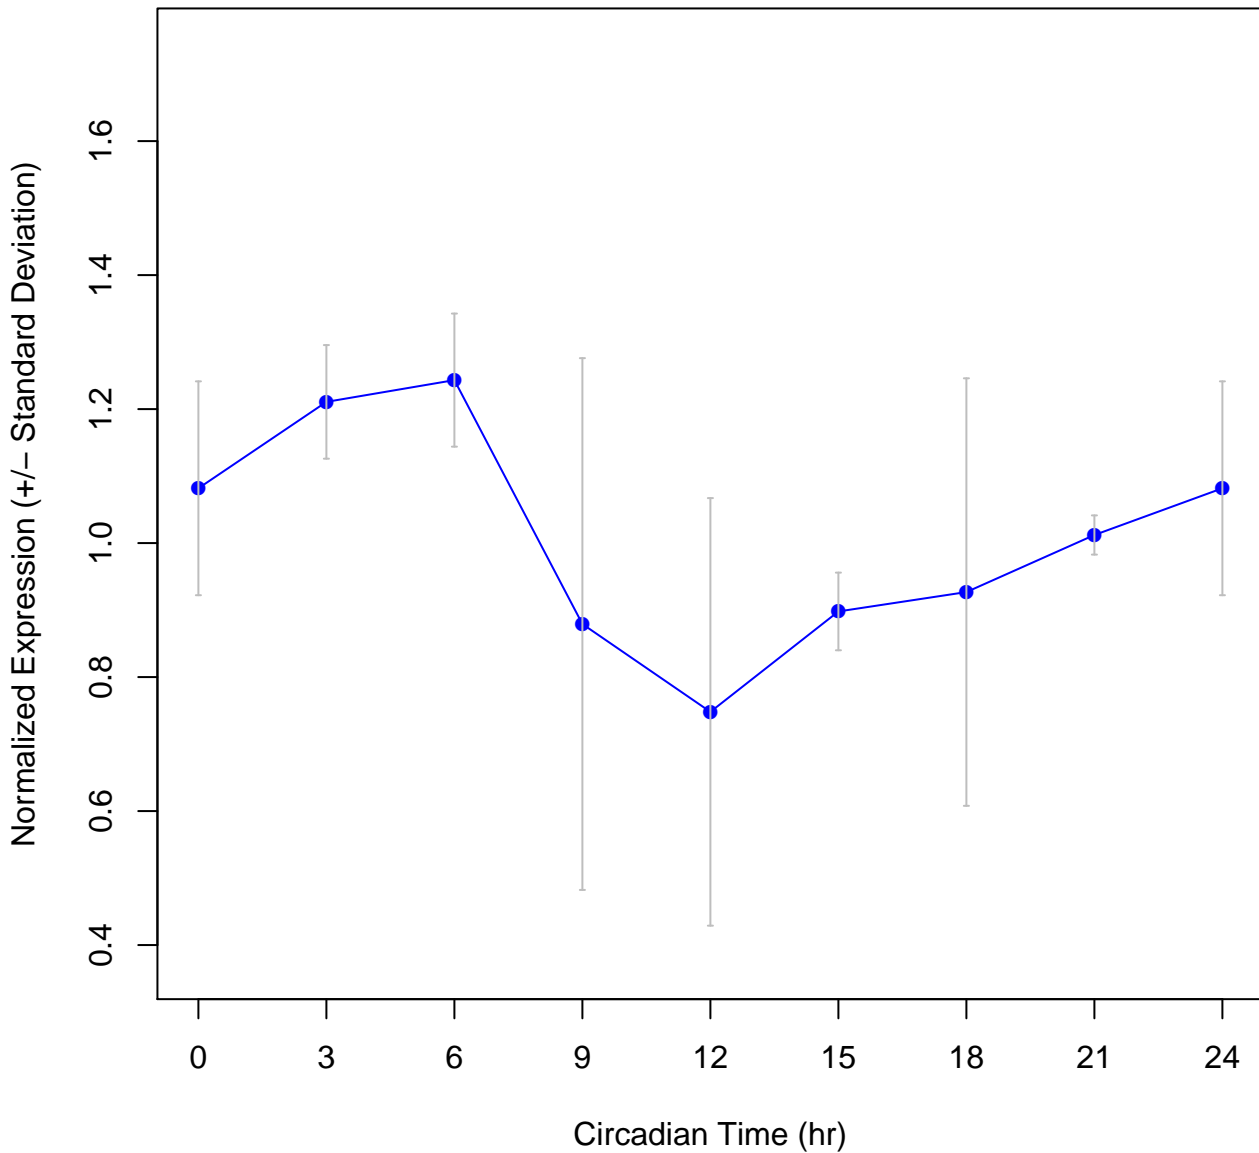

**Supplement Figure 5 Ipin1**

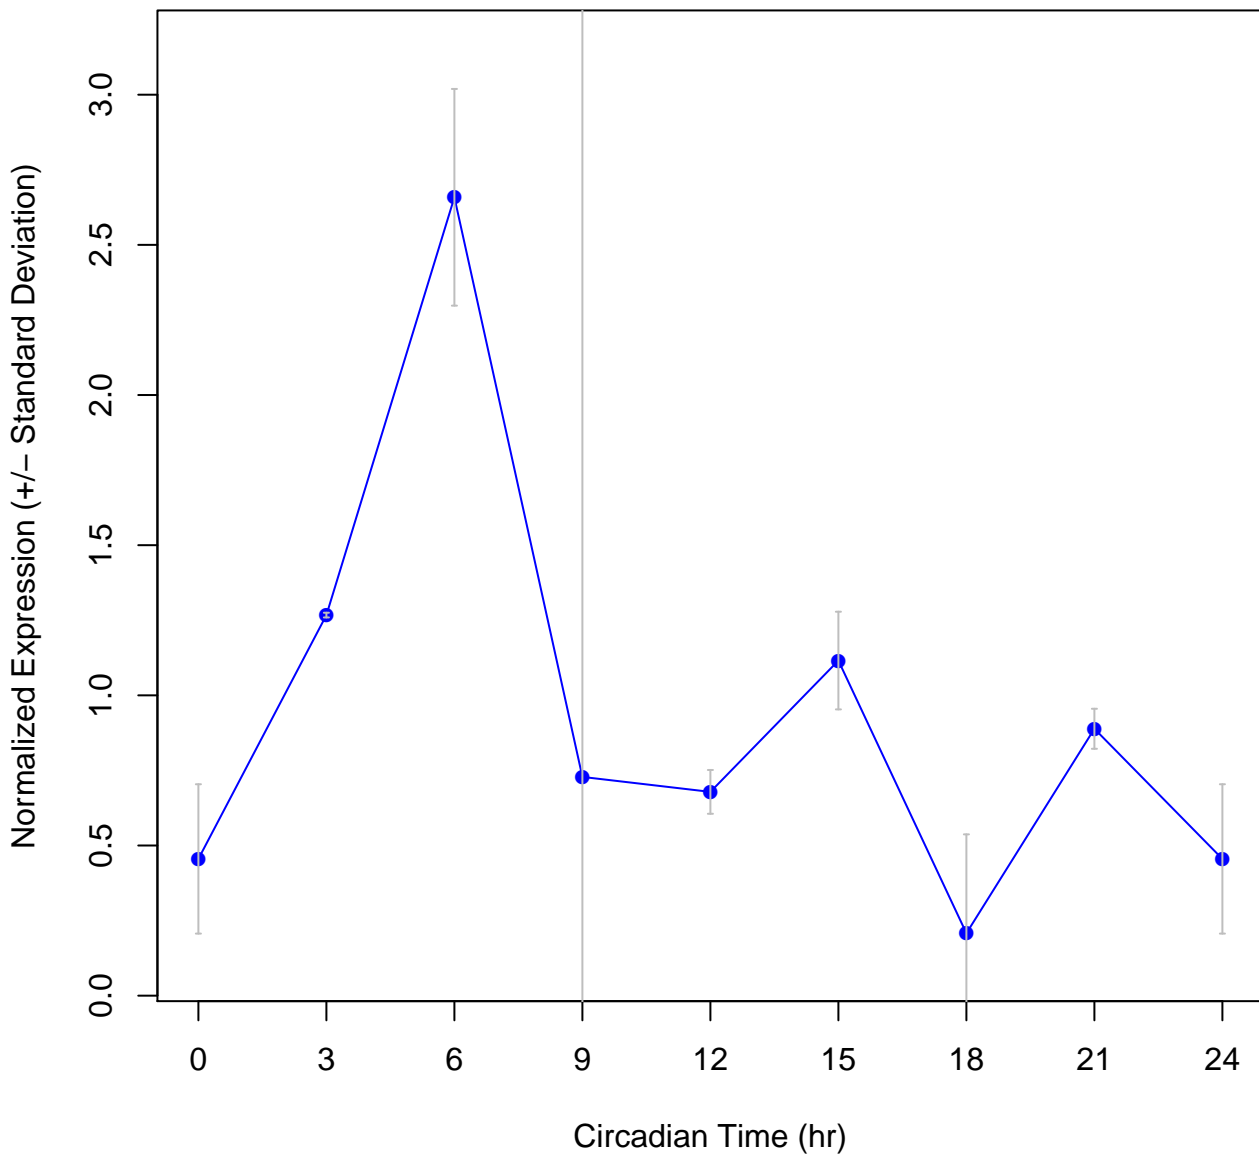

Supplement Figure 5 mad211

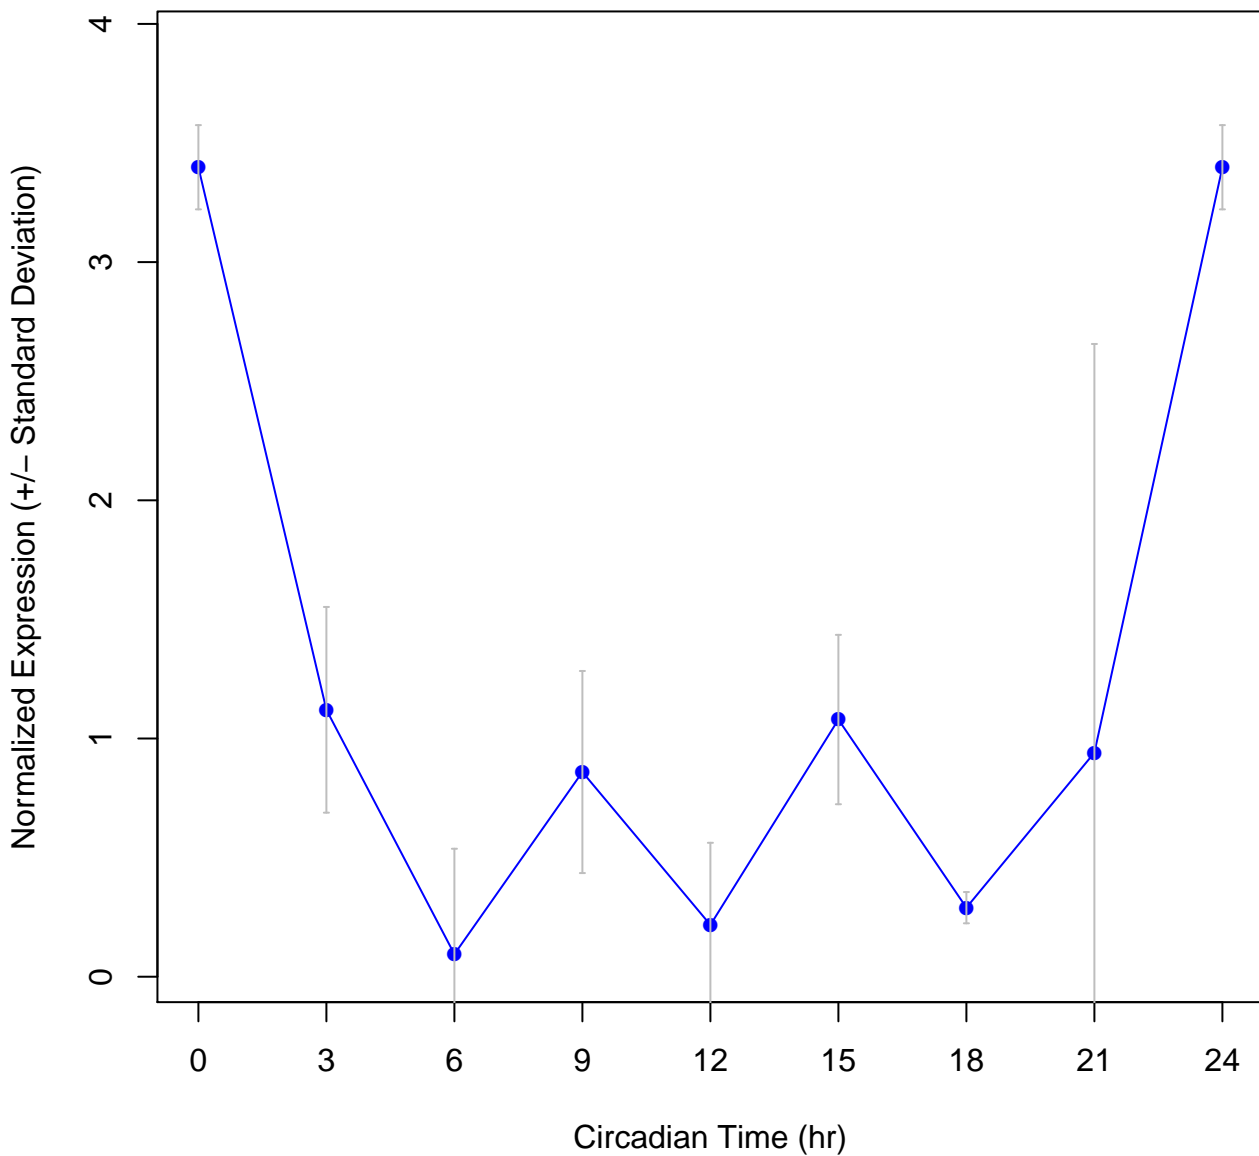



Supplement Figure 5 map2k1

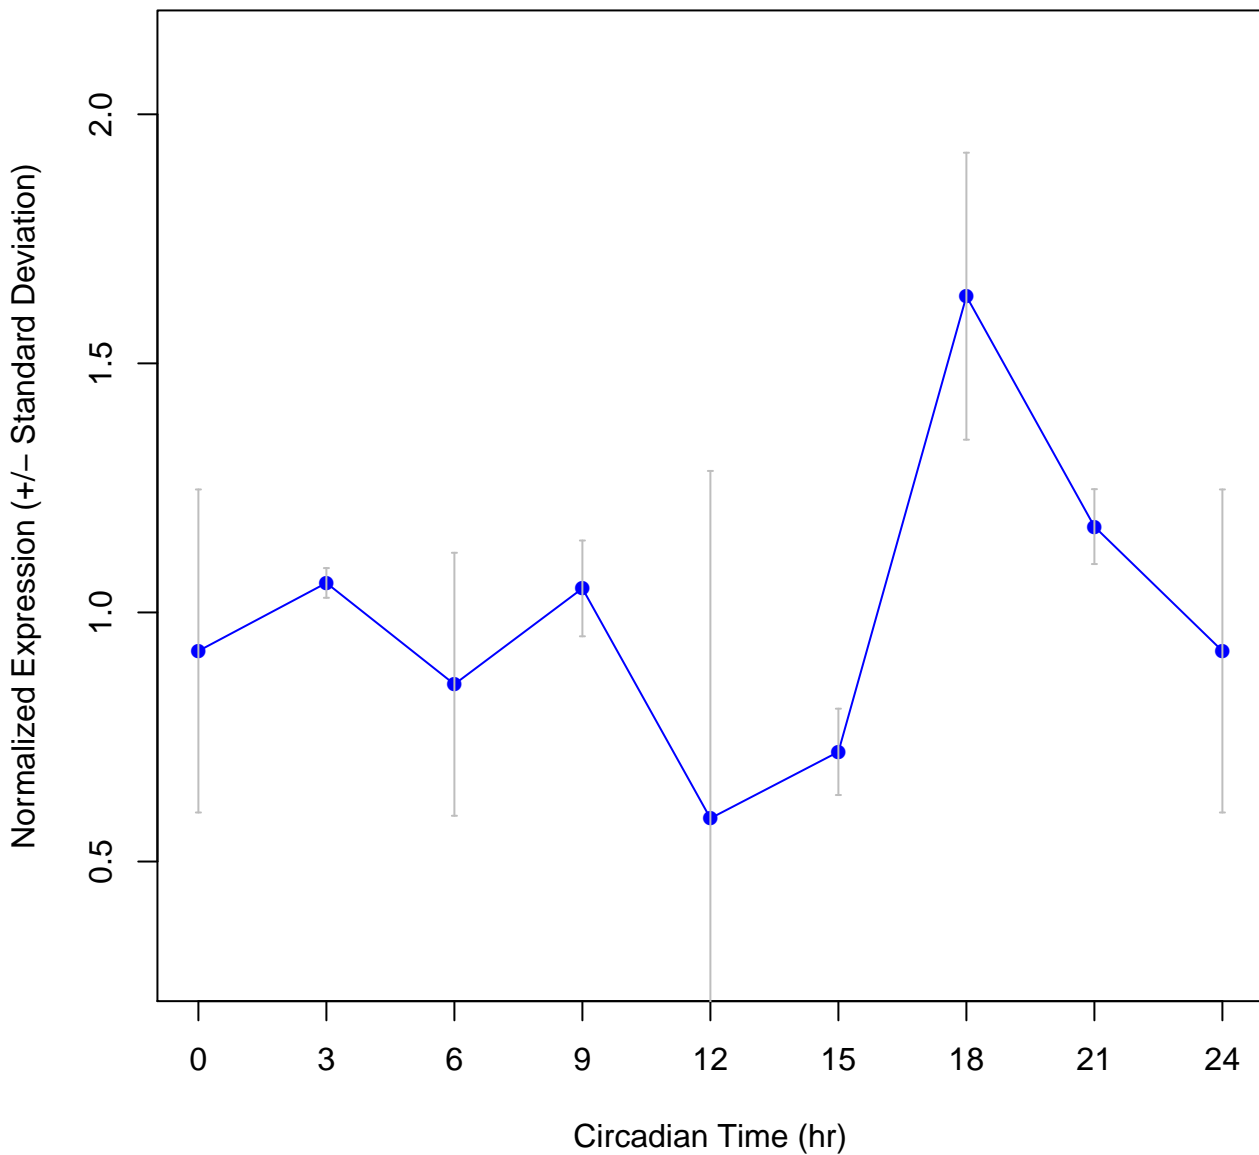

Supplement Figure 5 map2k6

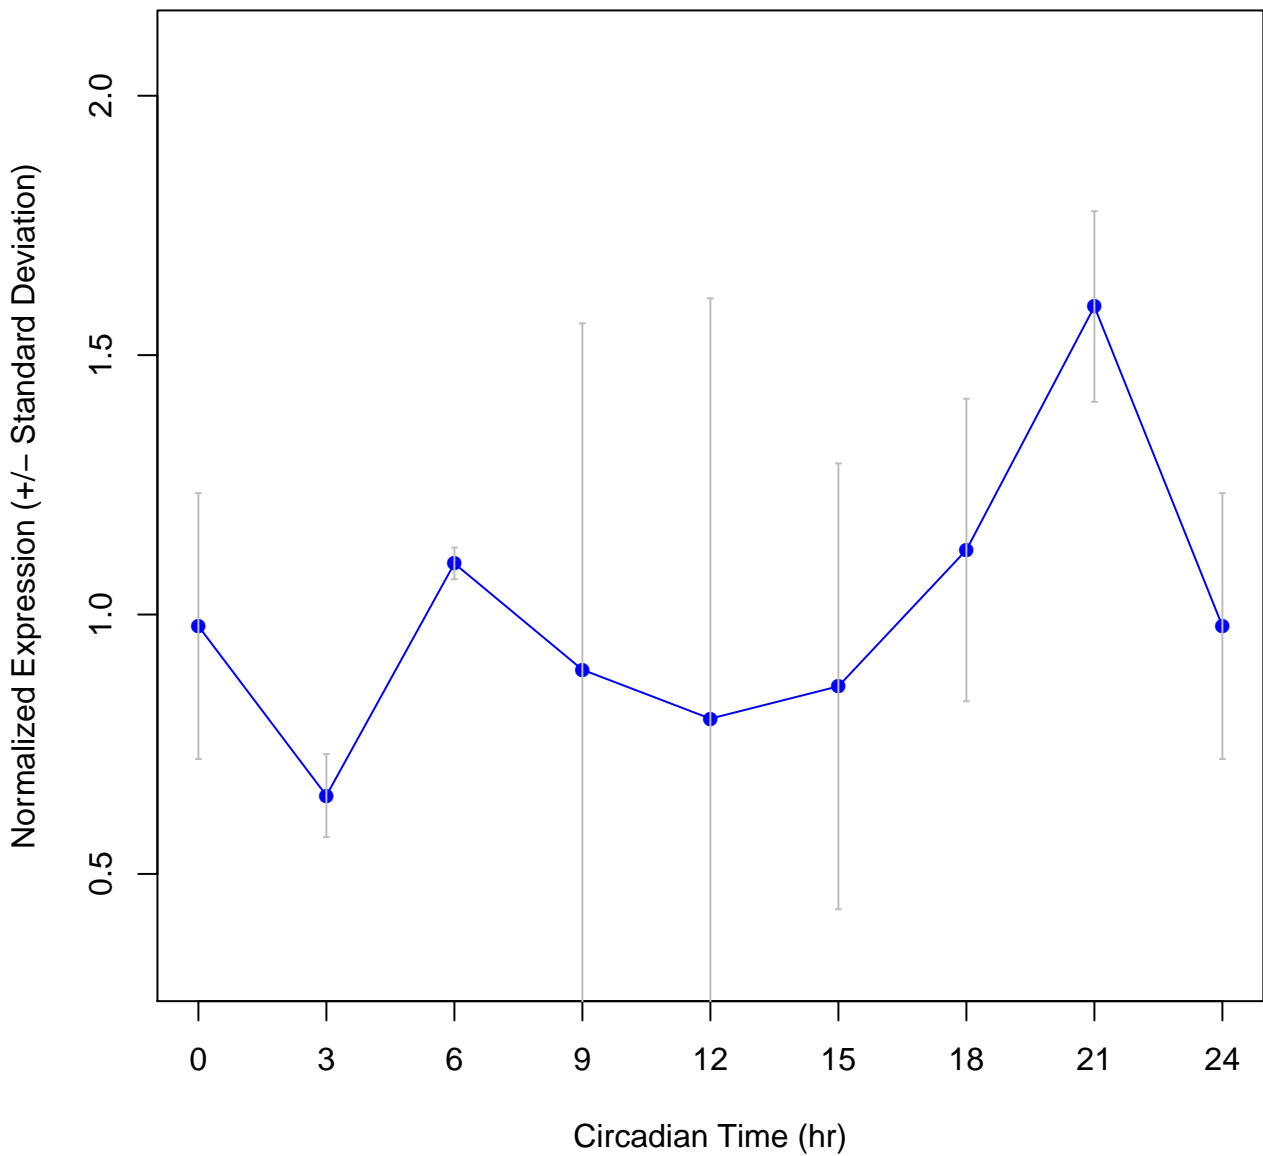

## Supplement Figure 5 mcl1

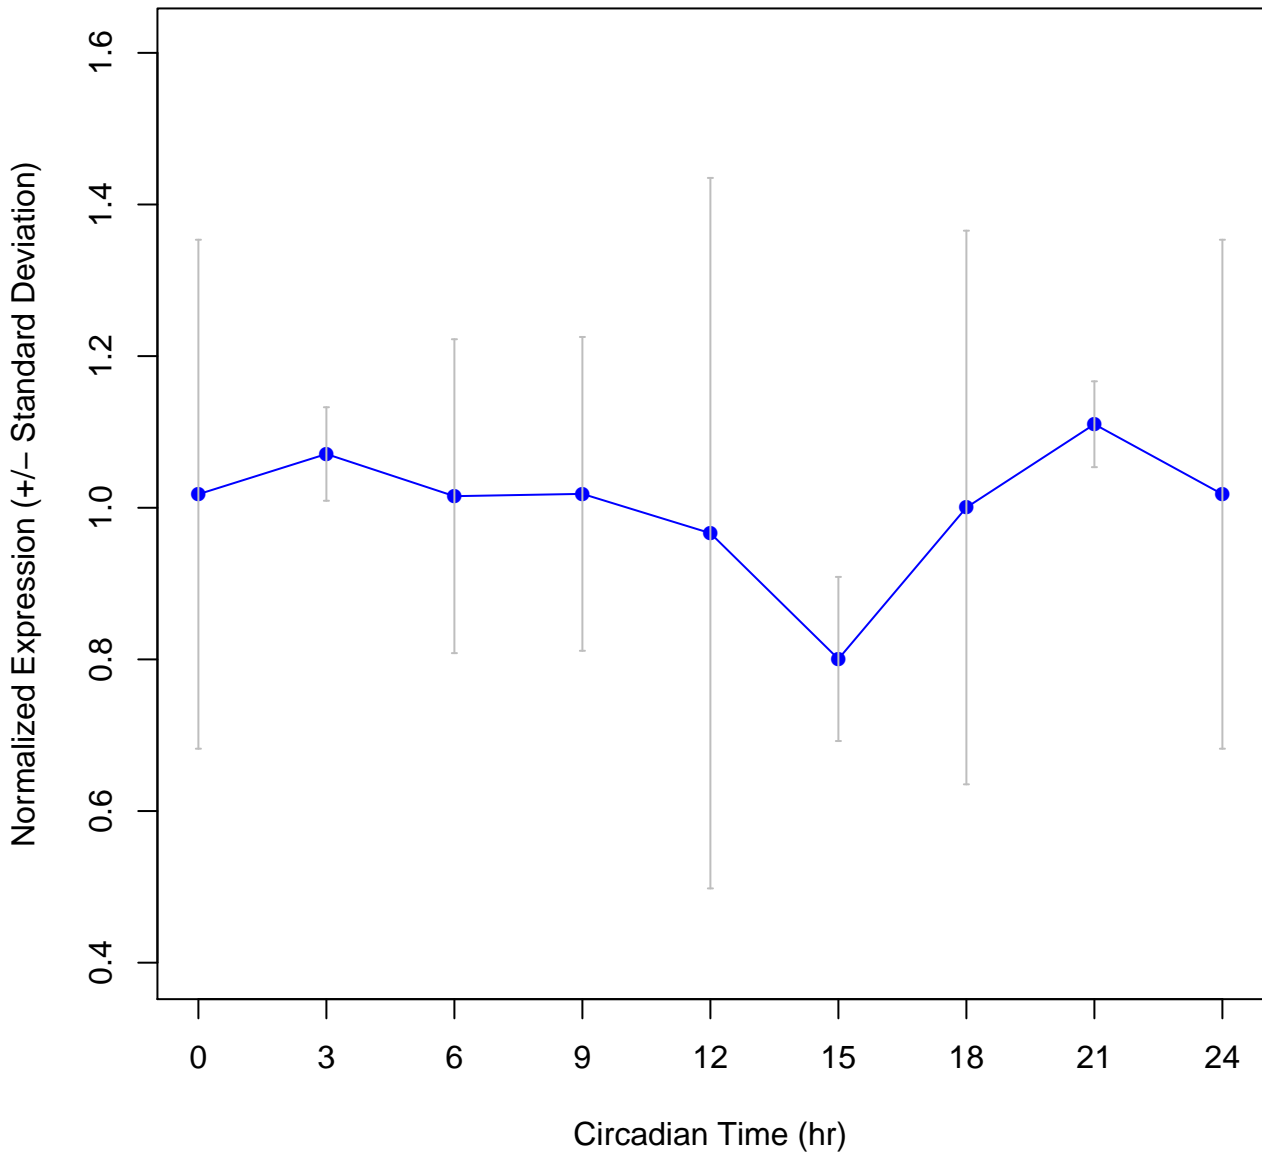

Supplement Figure 5 me1

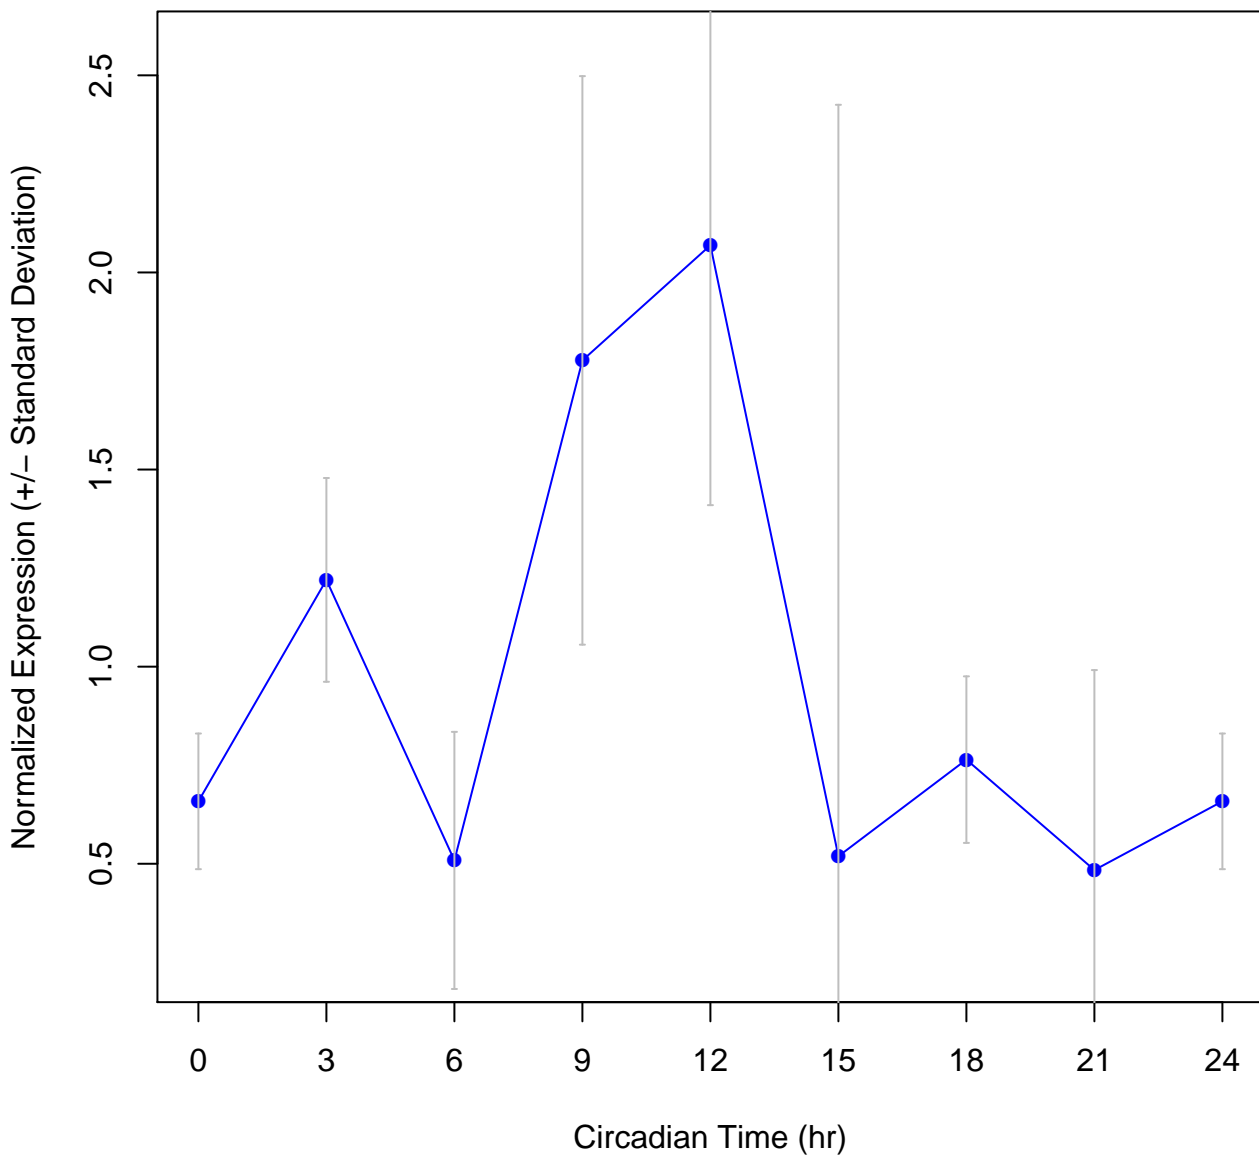

Supplement Figure 5 mgst1

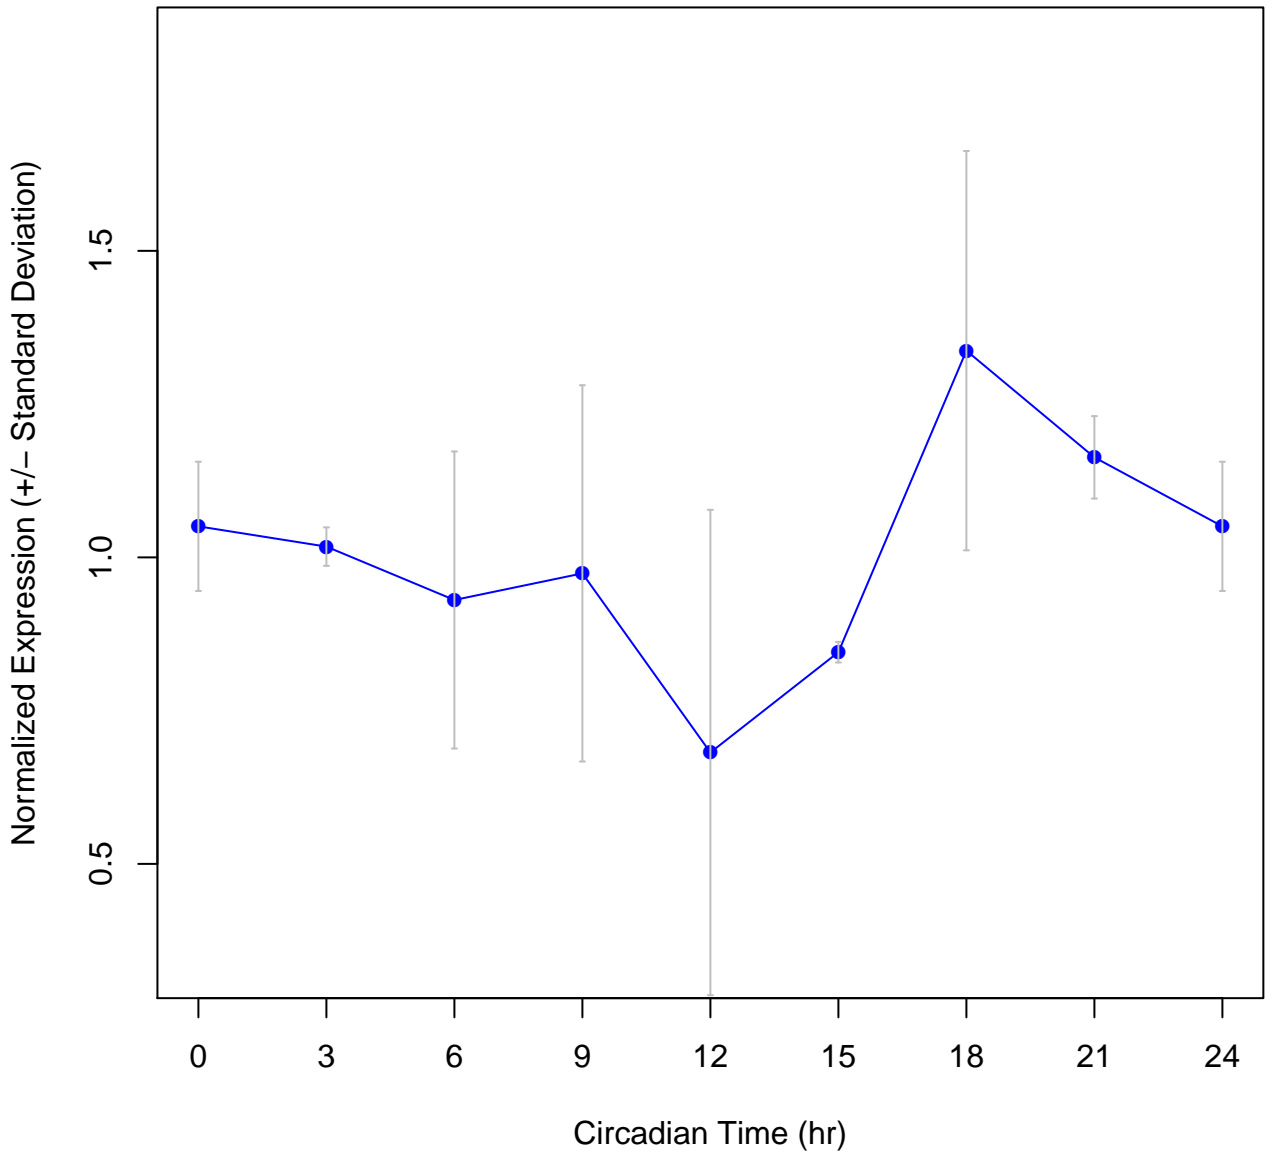

Supplement Figure 5 mitf

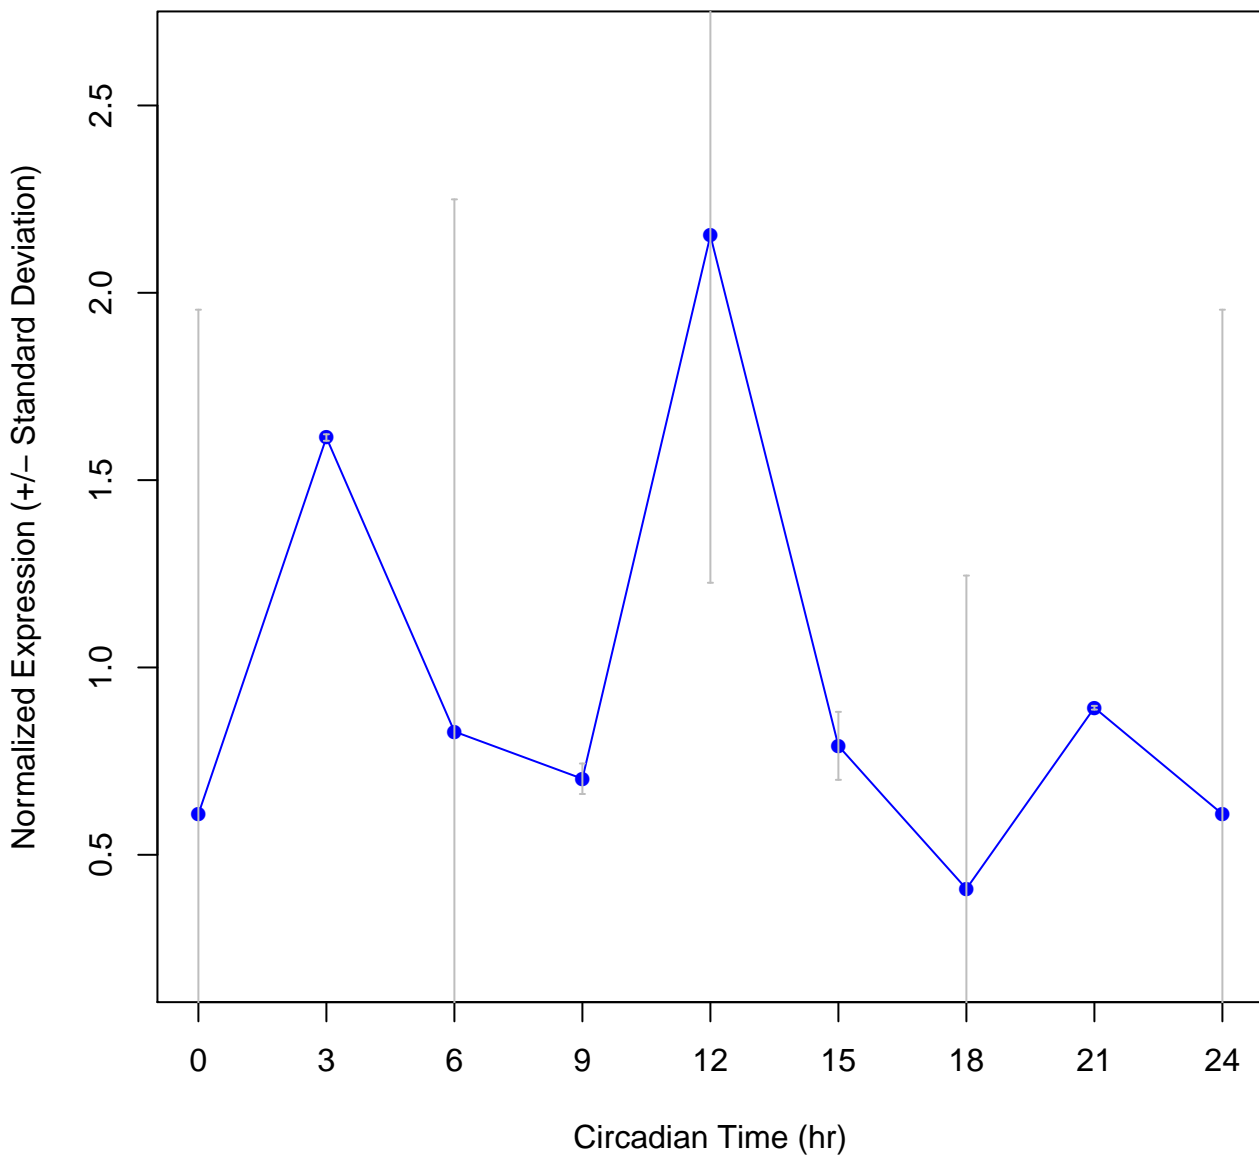

**Supplement Figure 5 mtcl**

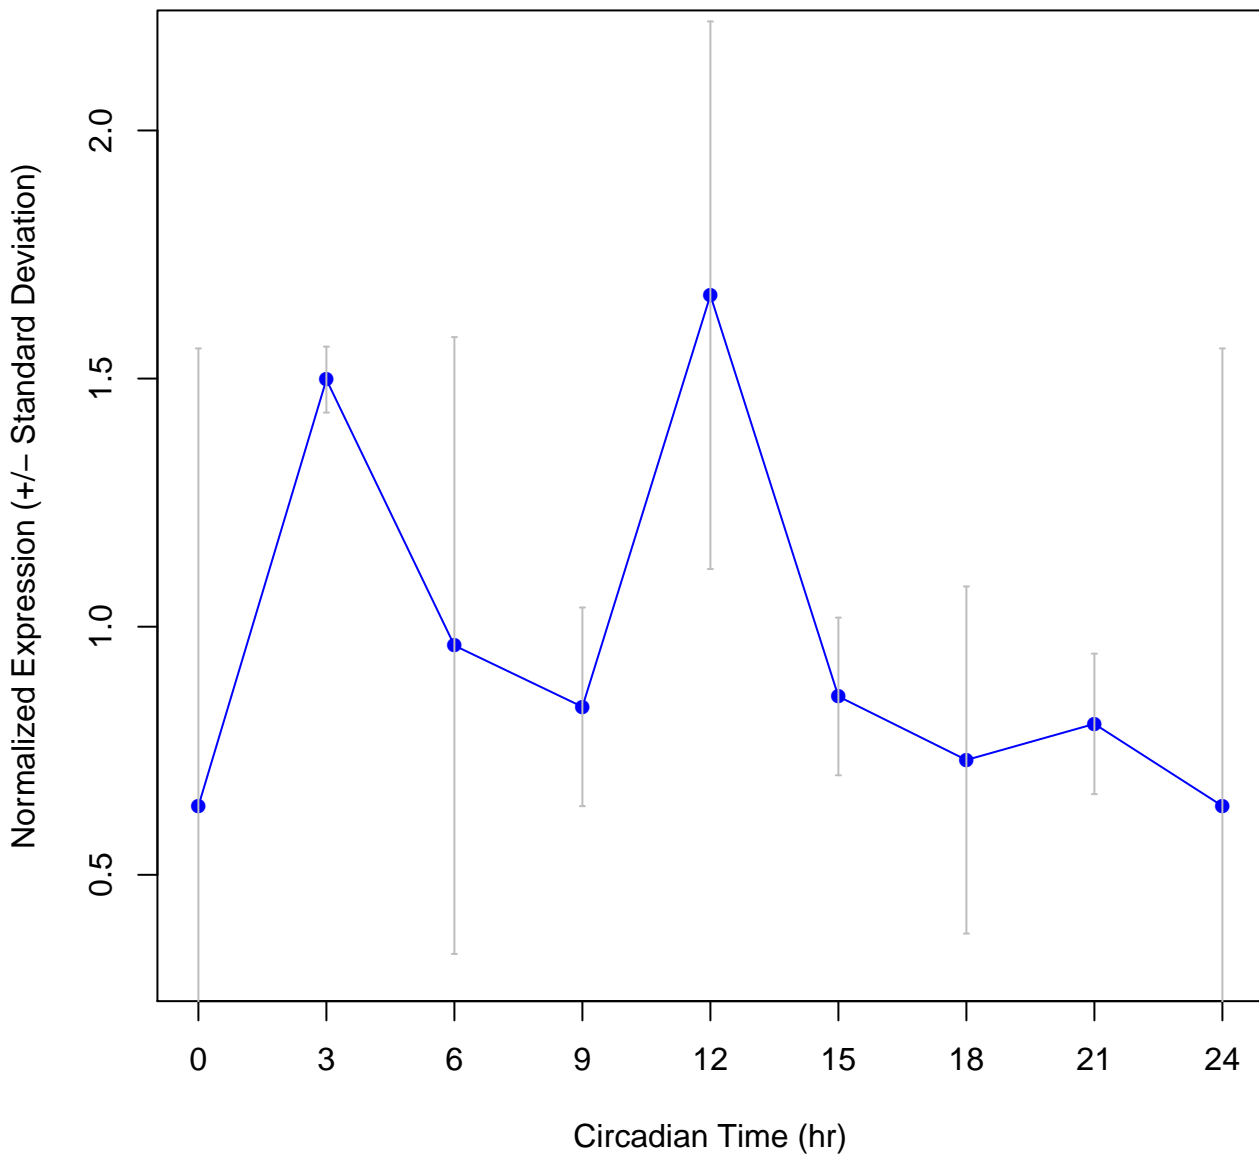

## Supplement Figure 5 mtor

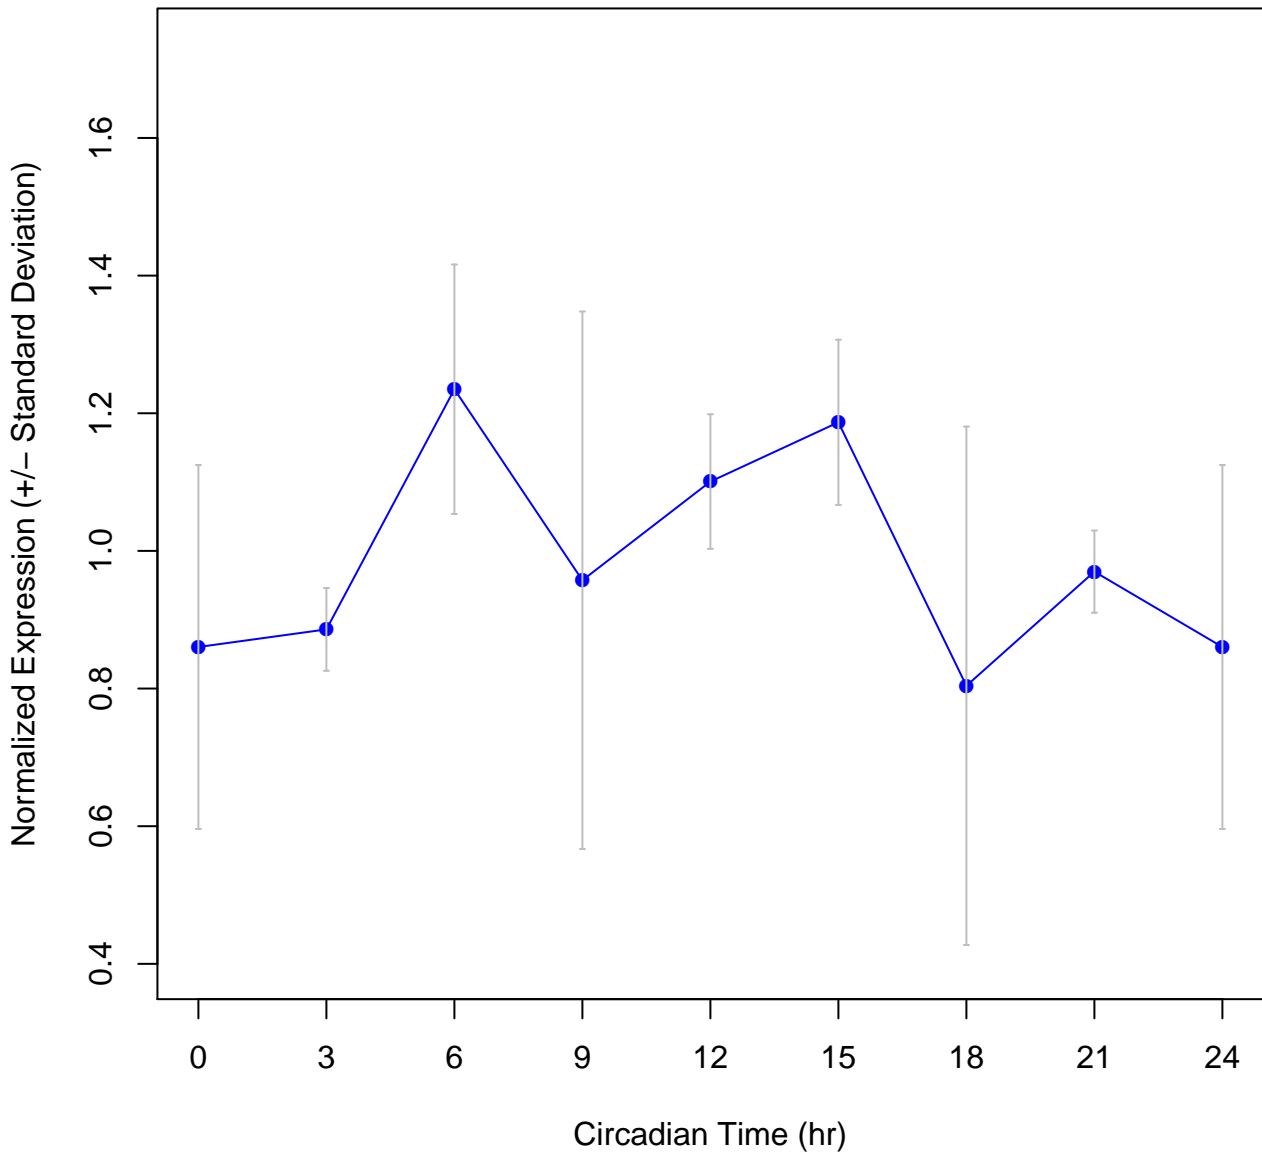



## Supplement Figure 5 myh14

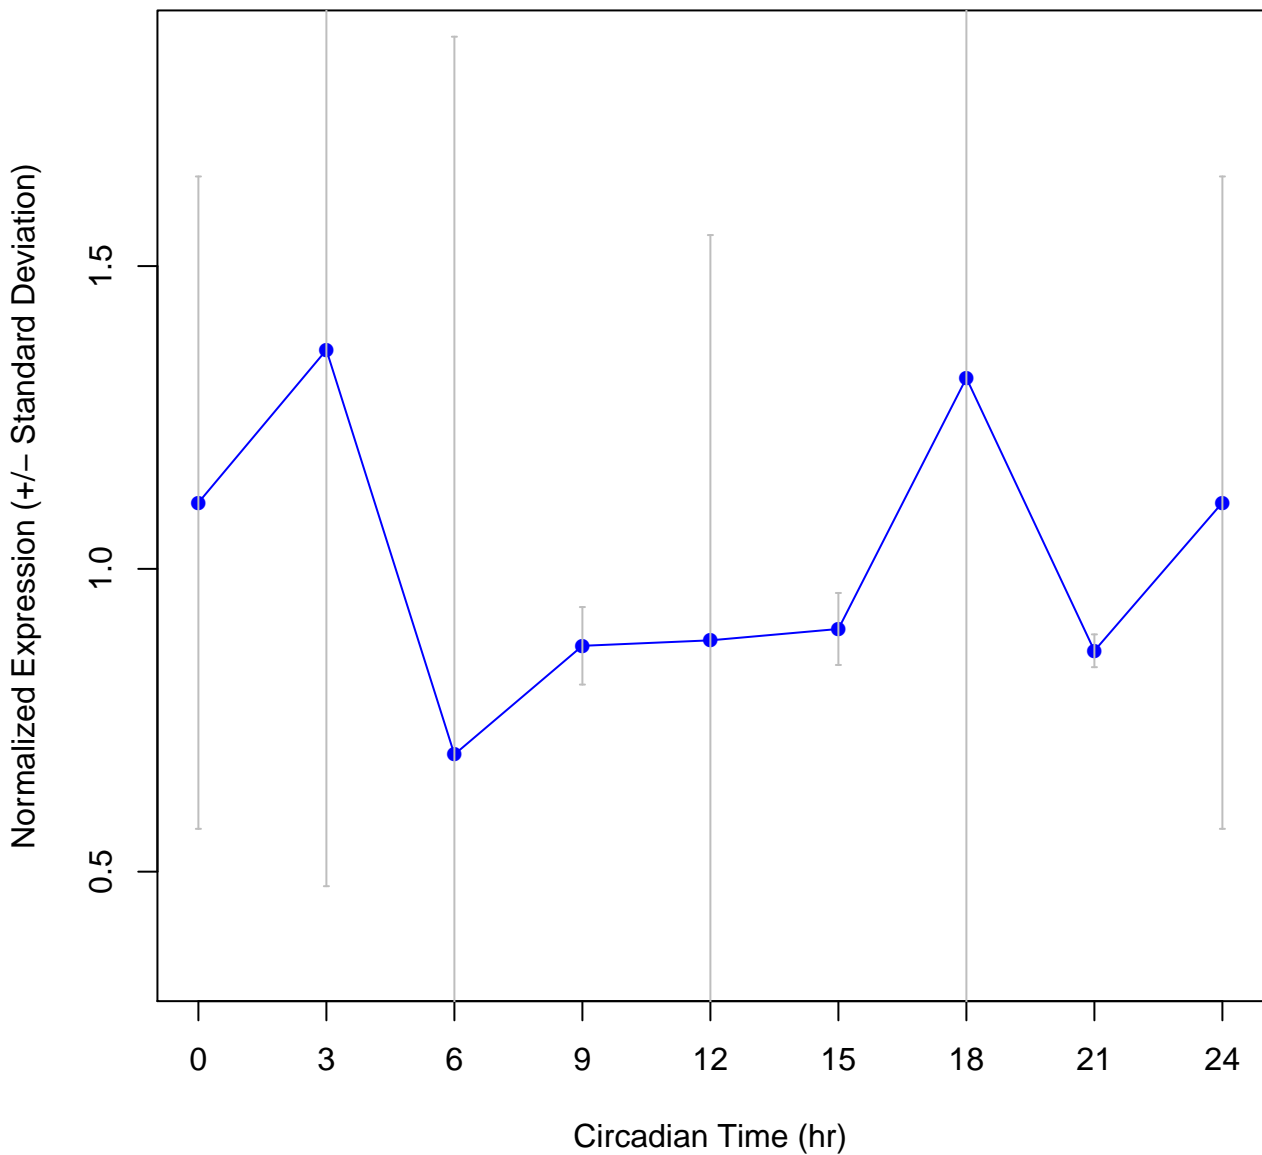

Supplement Figure 5 myl2b

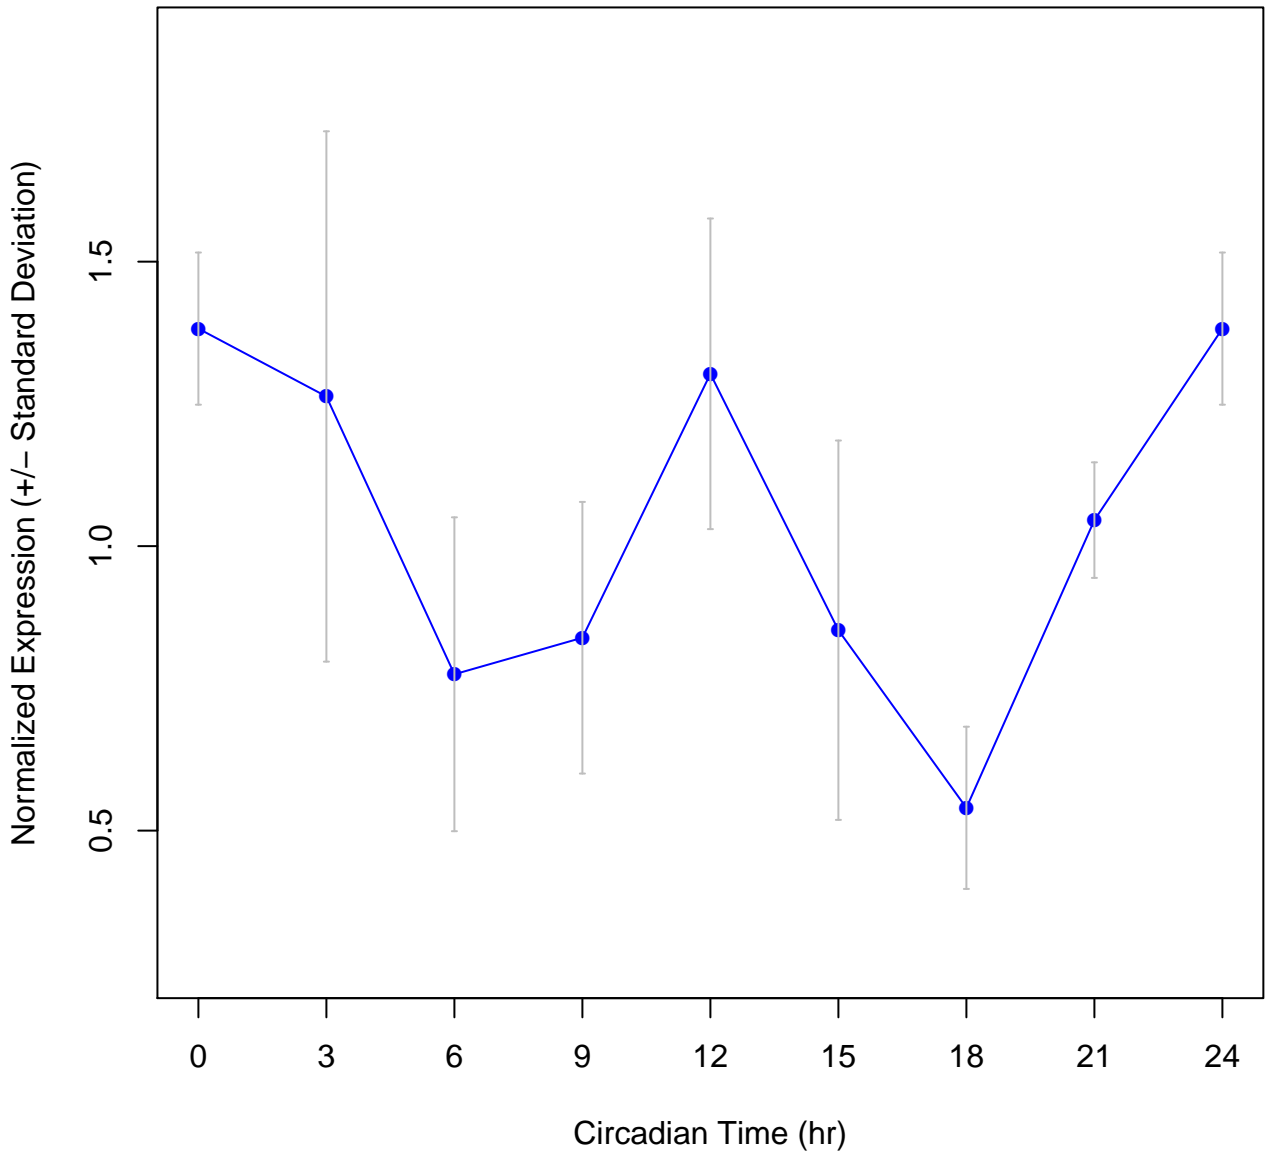

**Supplement Figure 5 nadsyn1**

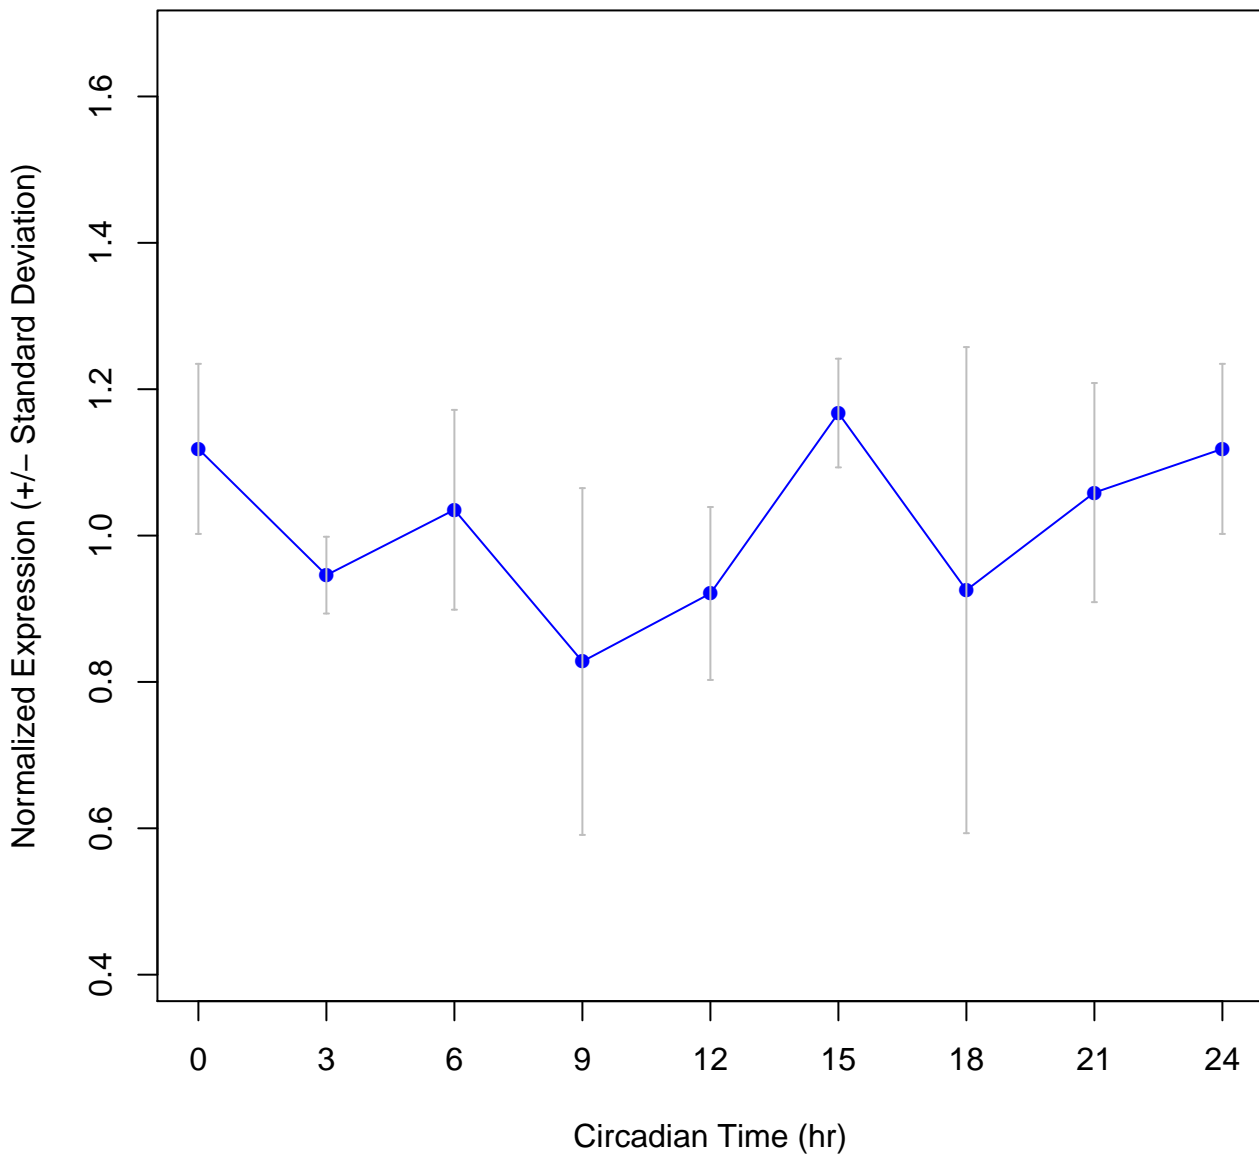

**Supplement Figure 5 ncor1**

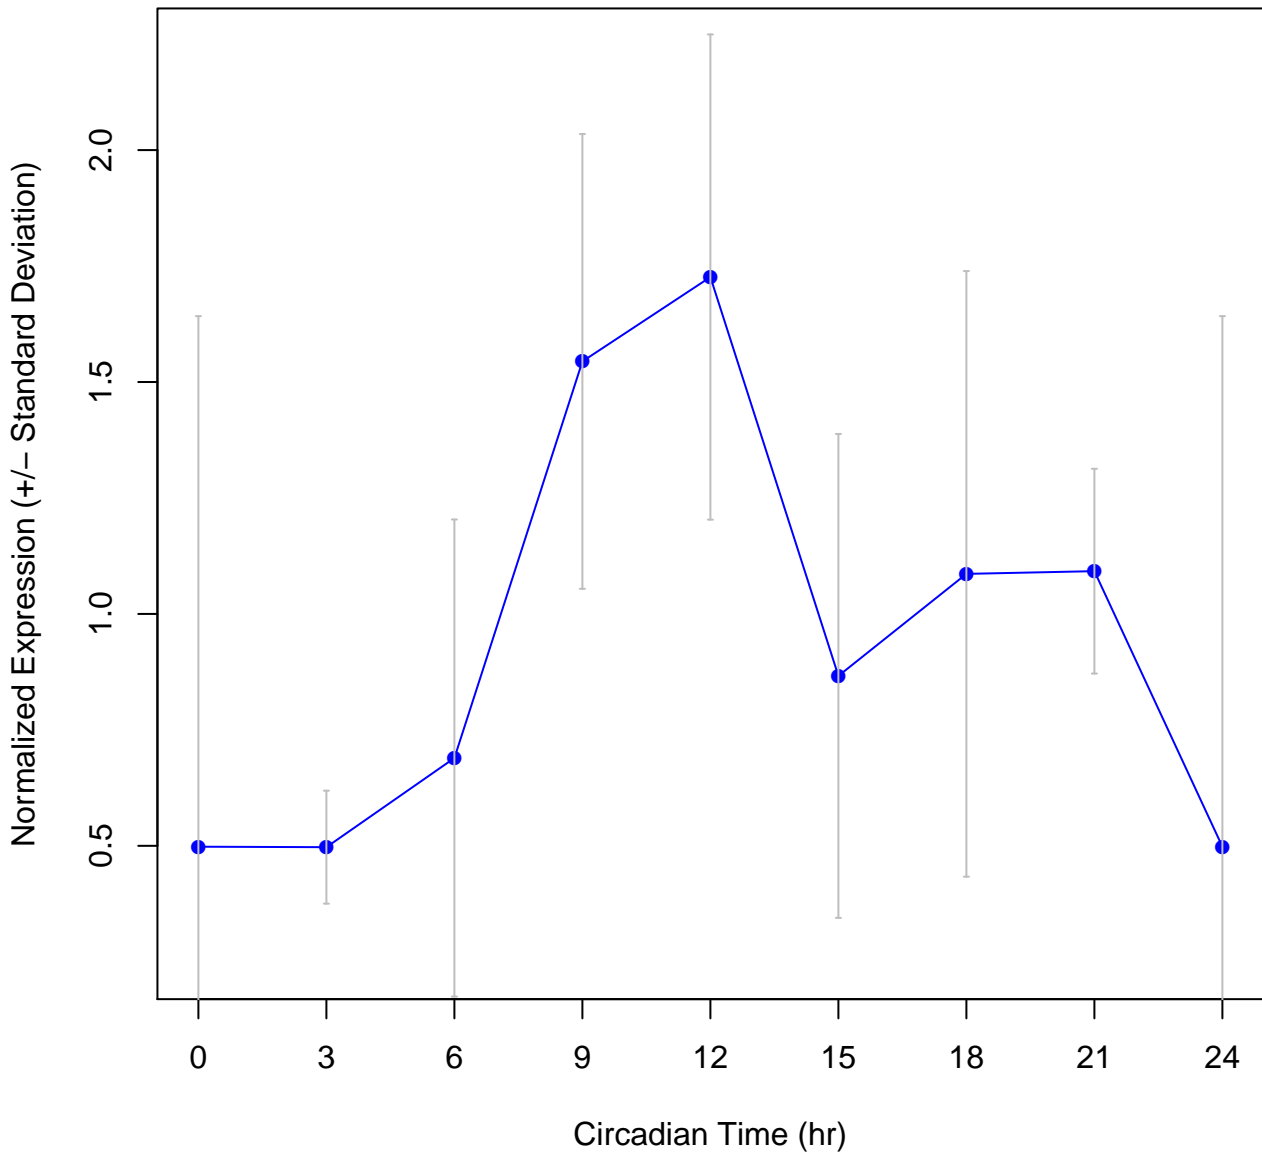

Supplement Figure 5 ncor2

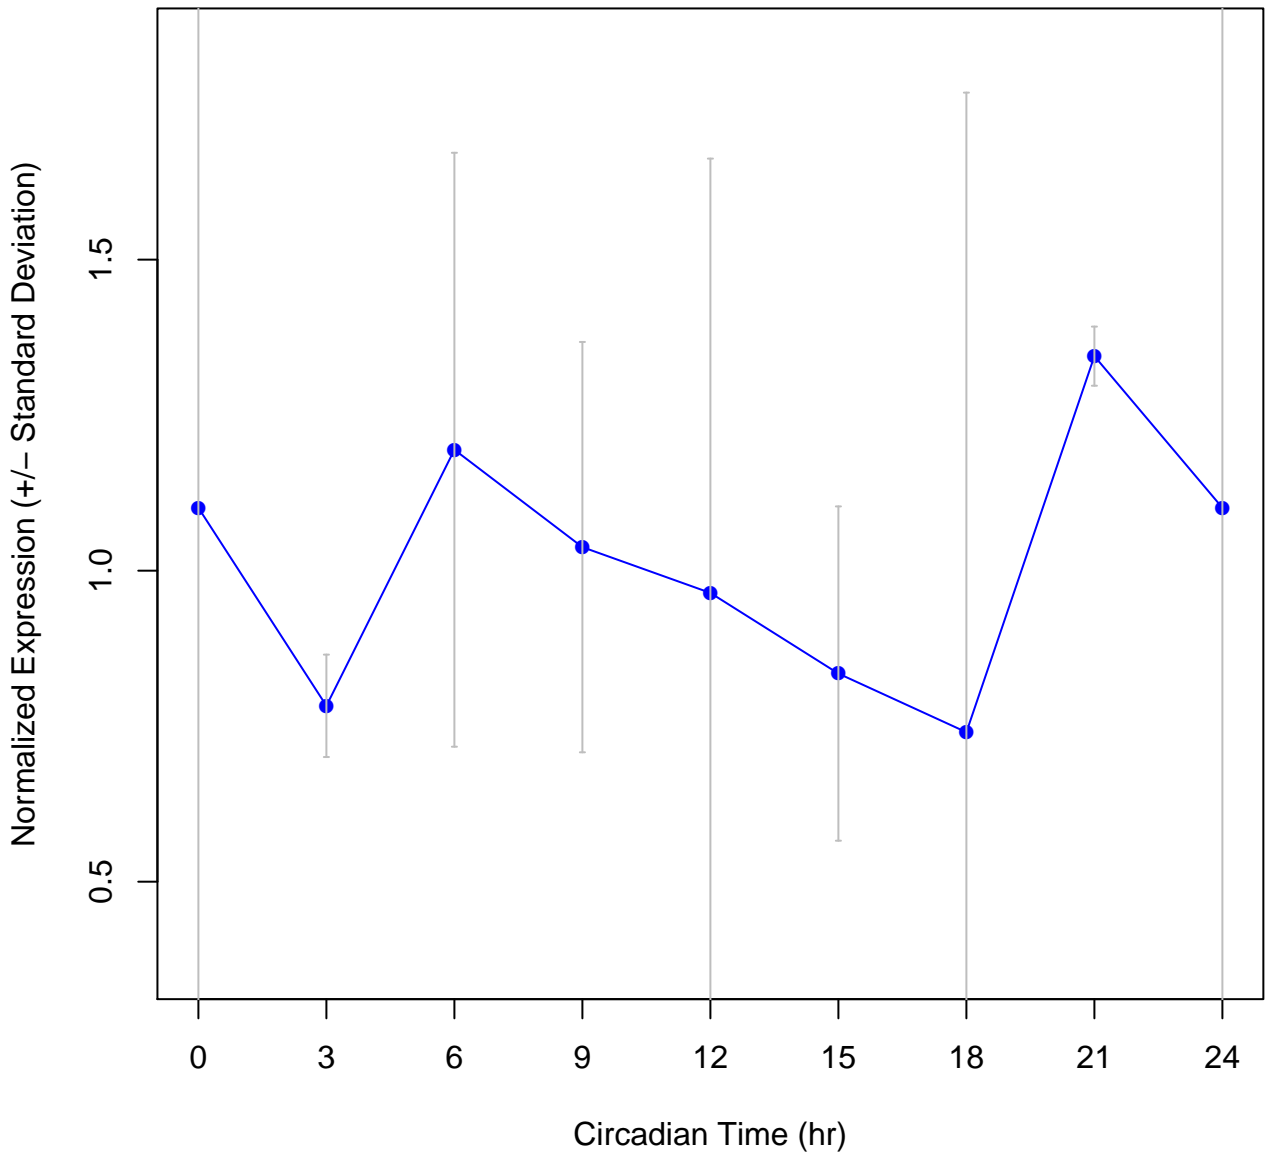

## Supplement Figure 5 nos2

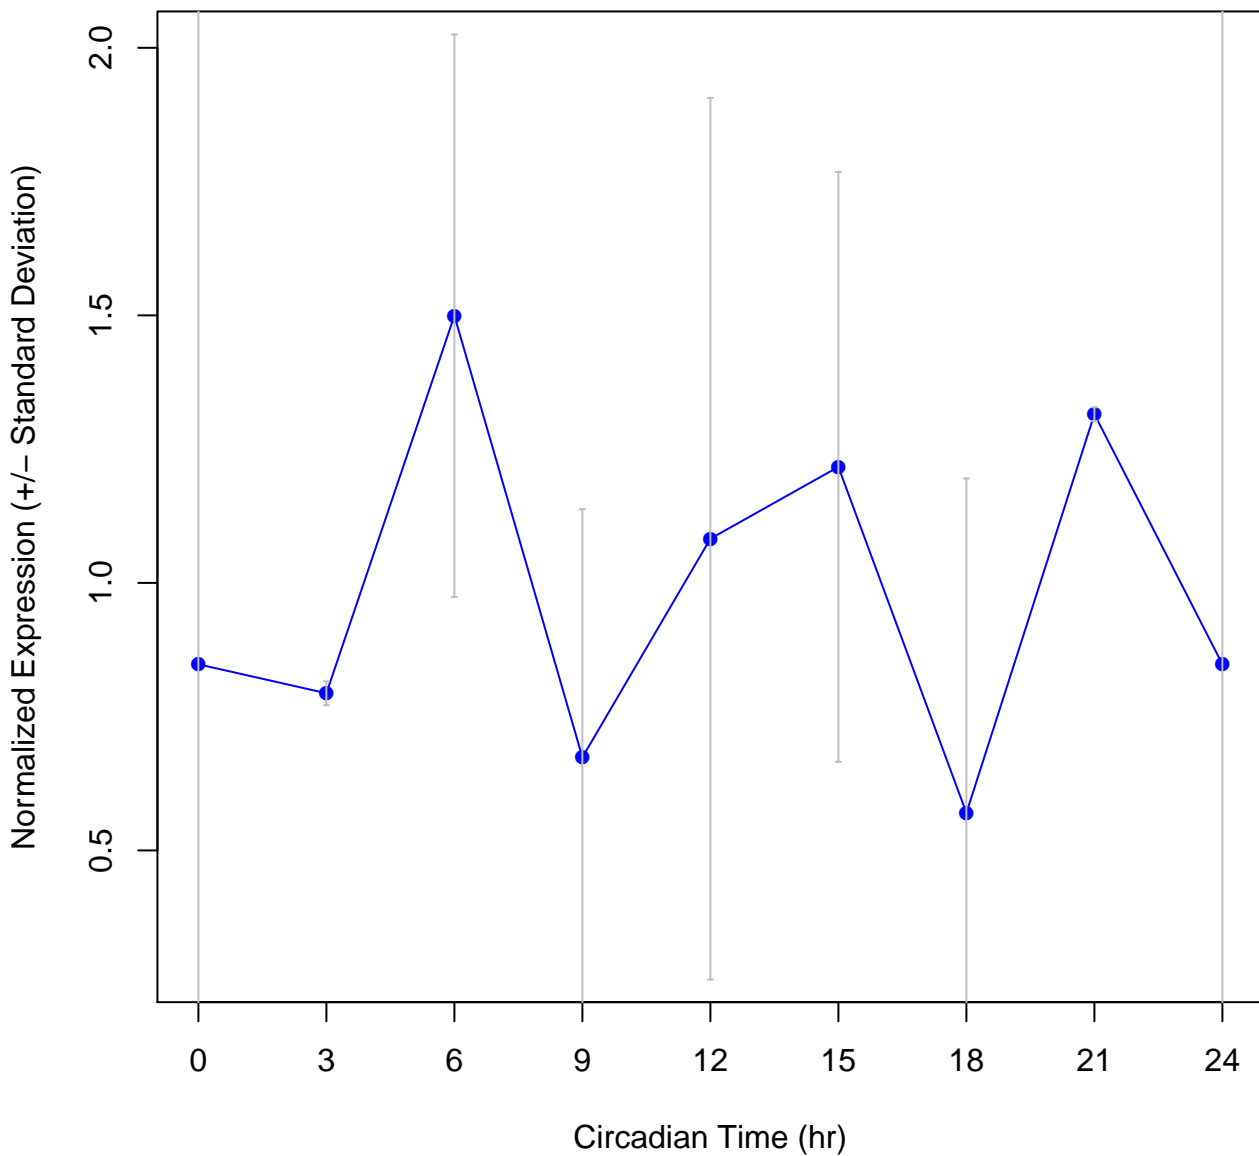

Supplement Figure 5 nr1d1

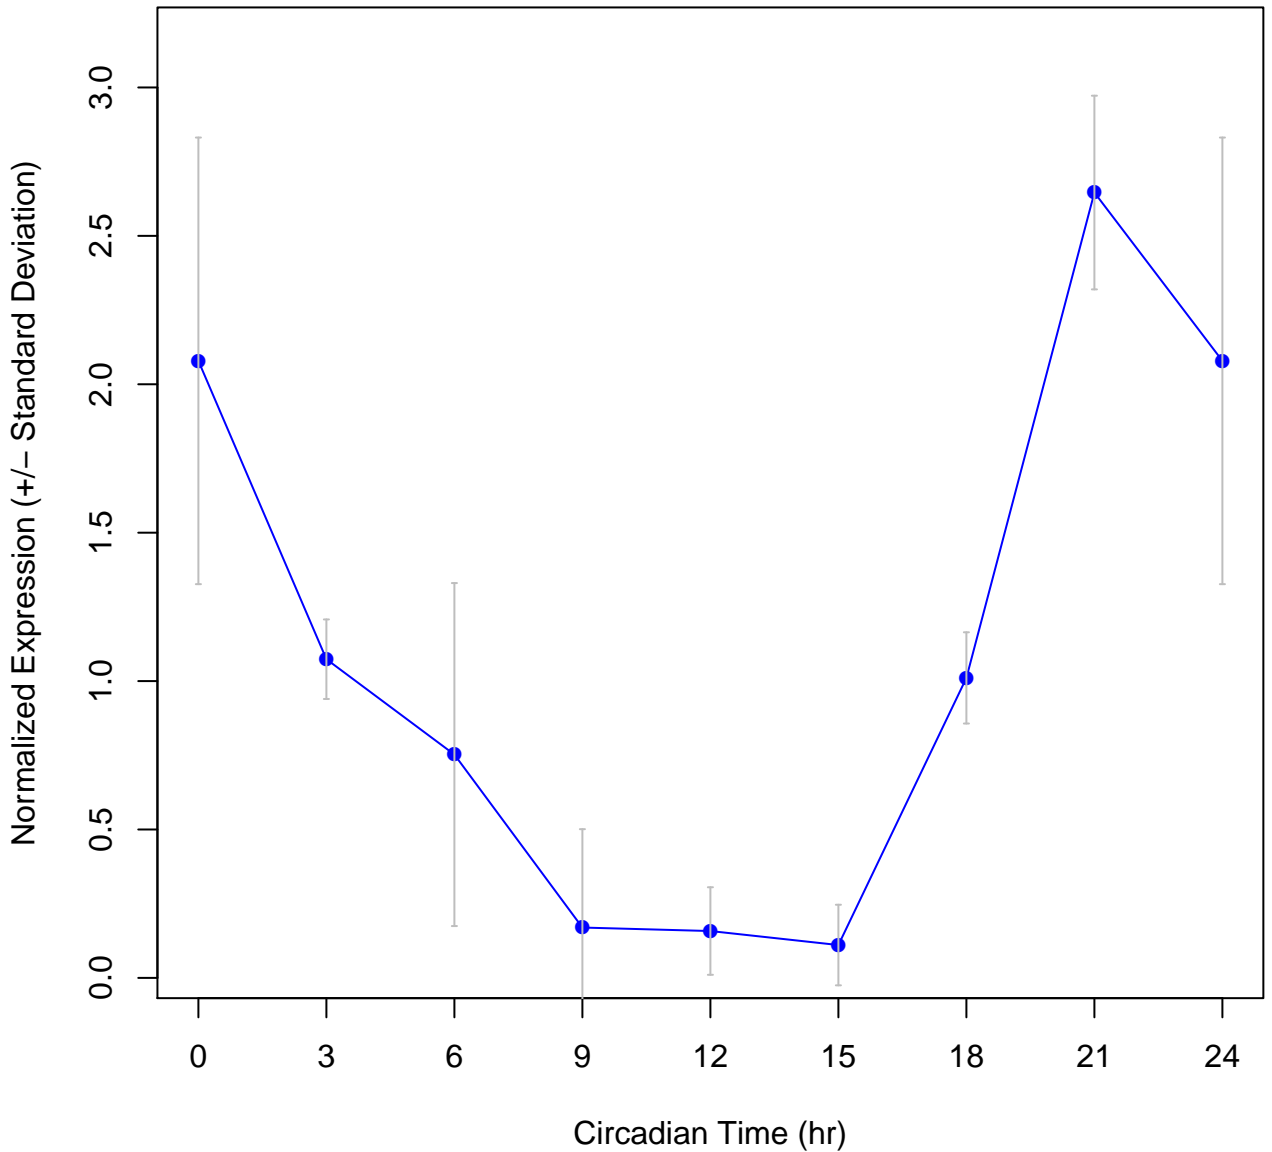

Supplement Figure 5 nr1d2

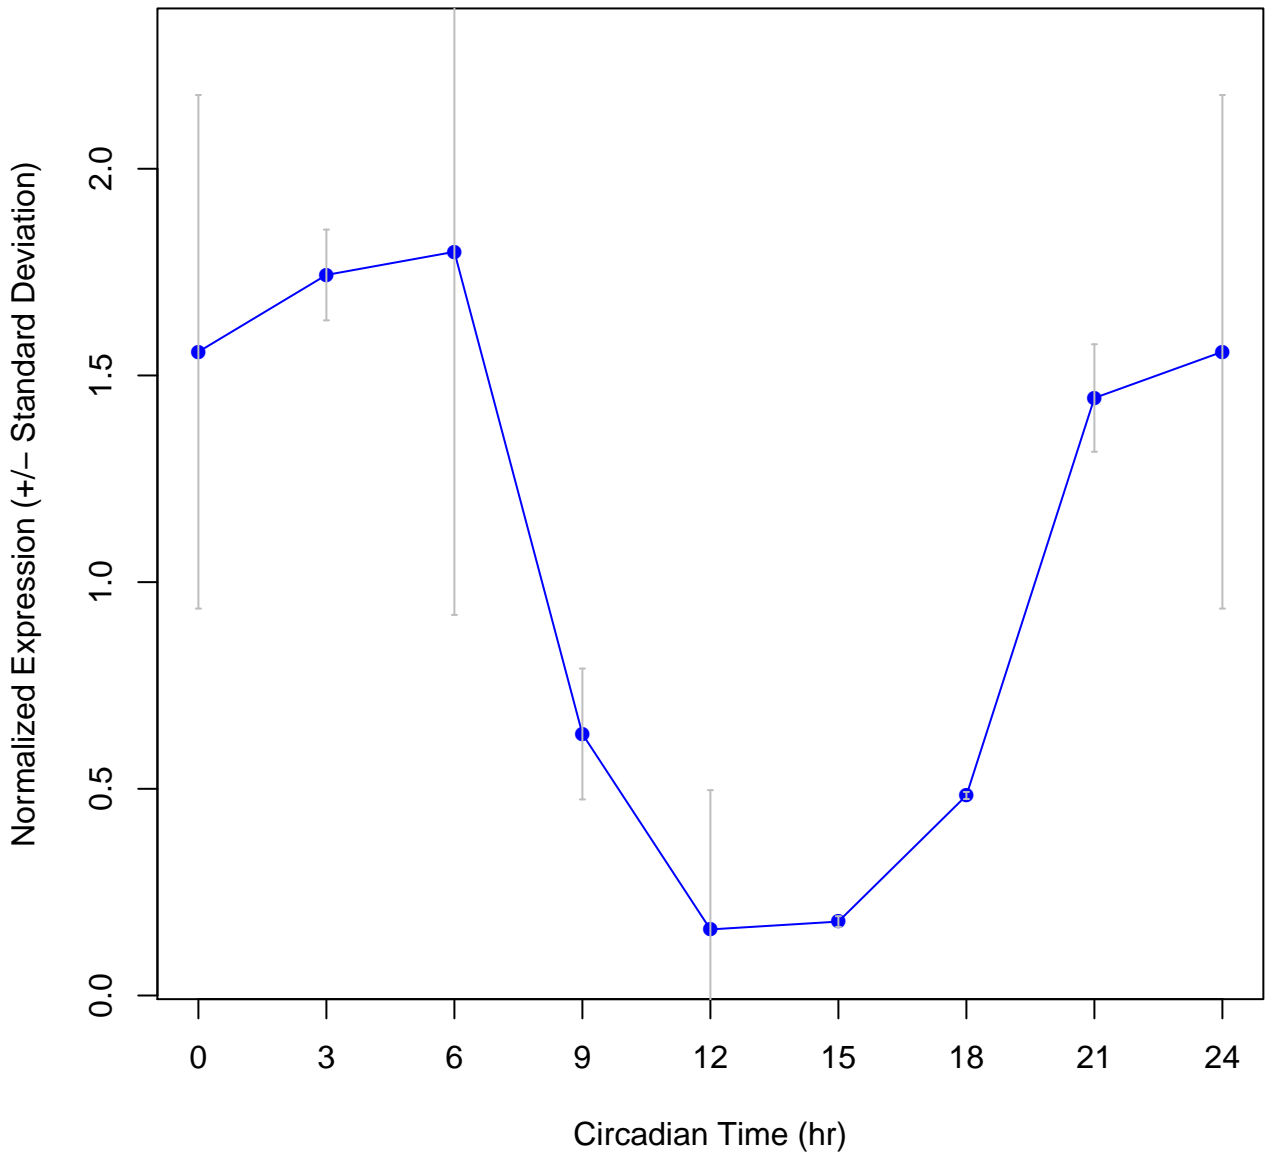



Supplement Figure 5 nr1d4

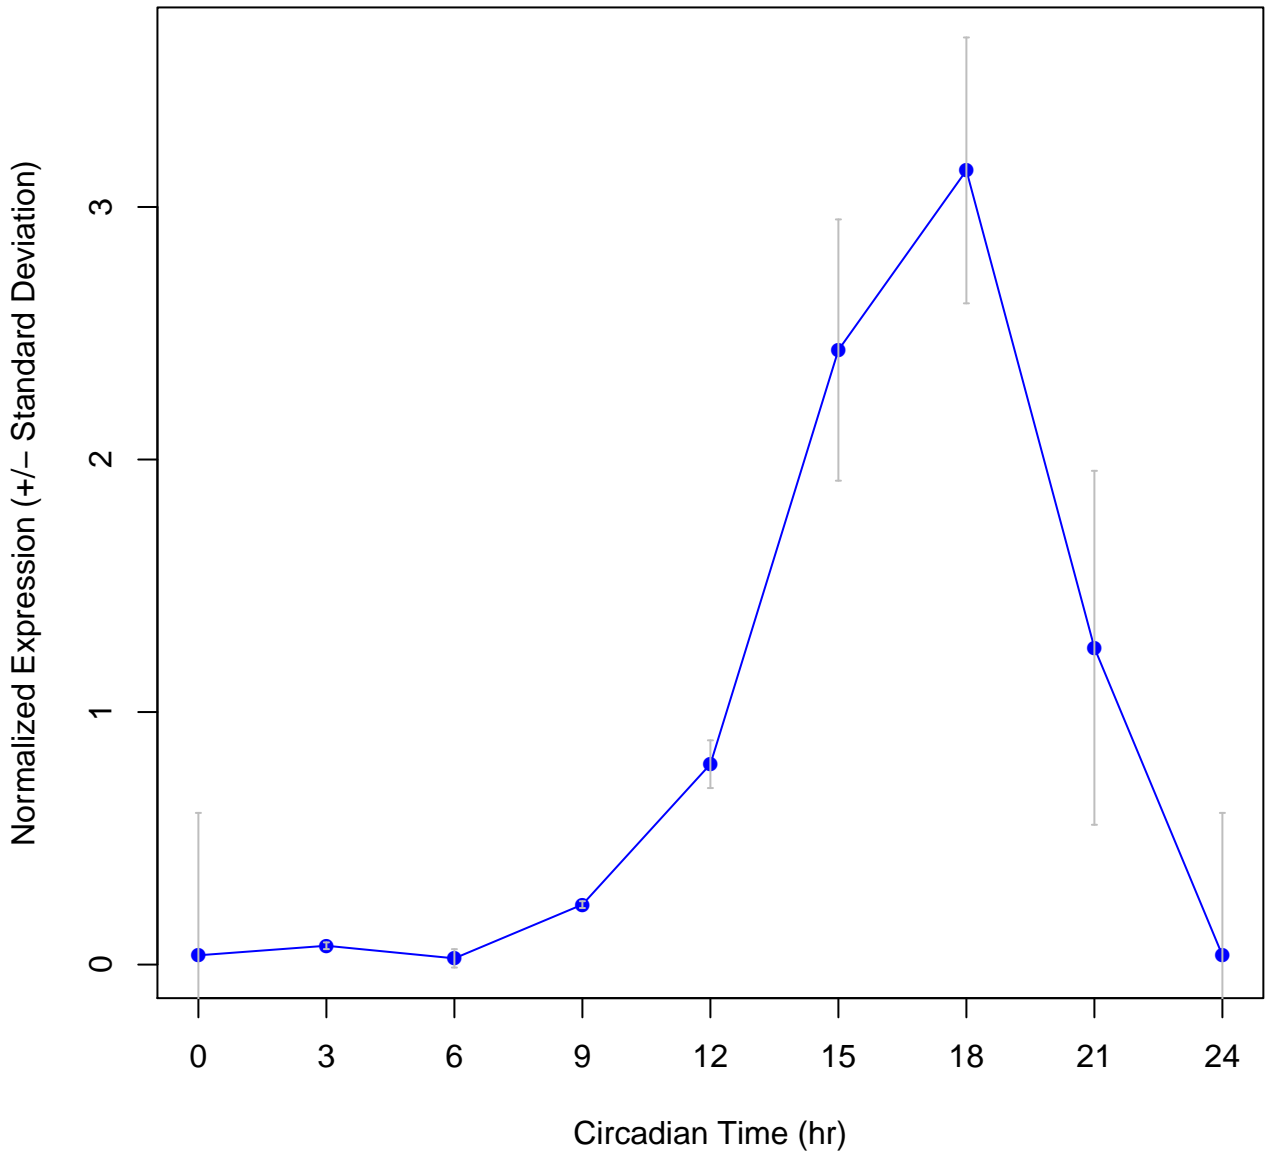

Supplement Figure 5 numa1

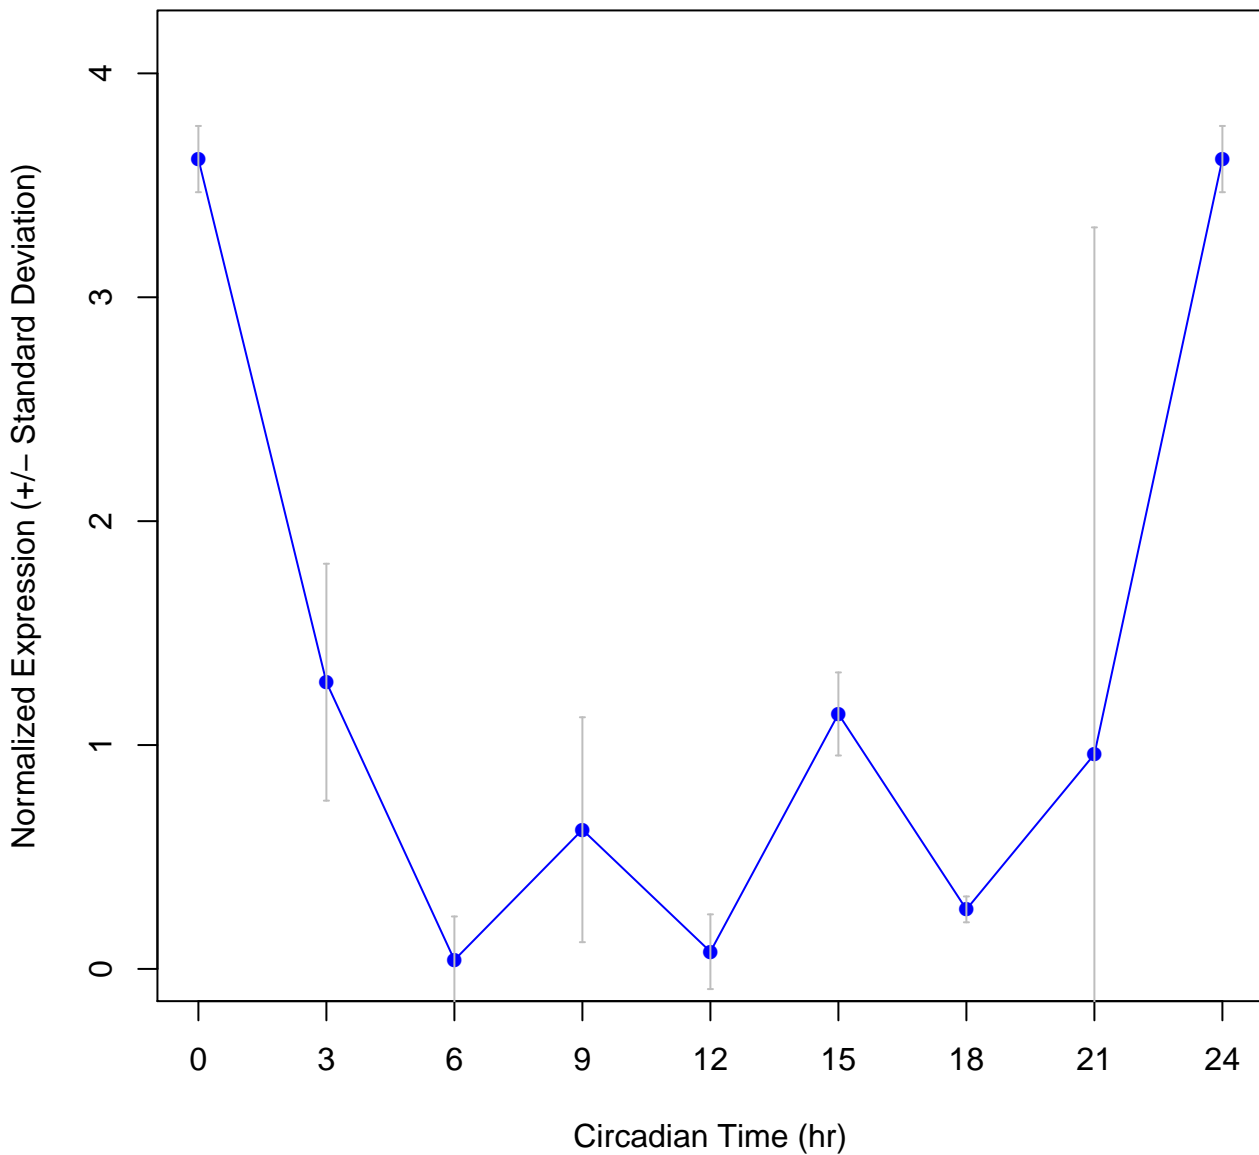

Supplement Figure 5 opn1sw

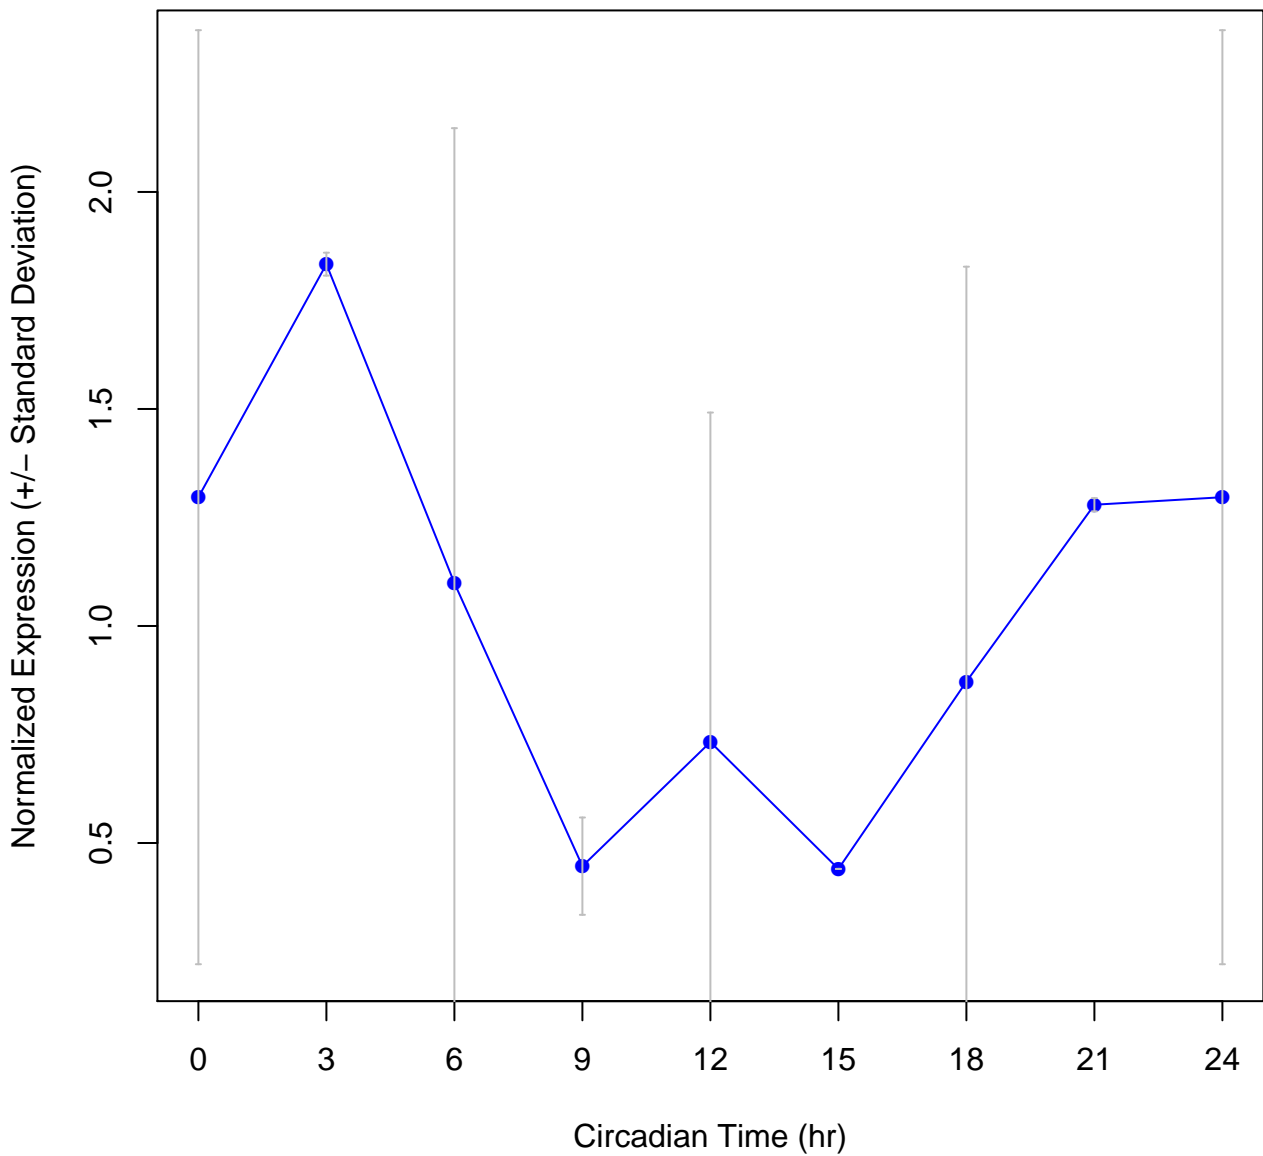

**Supplement Figure 5 pacap**

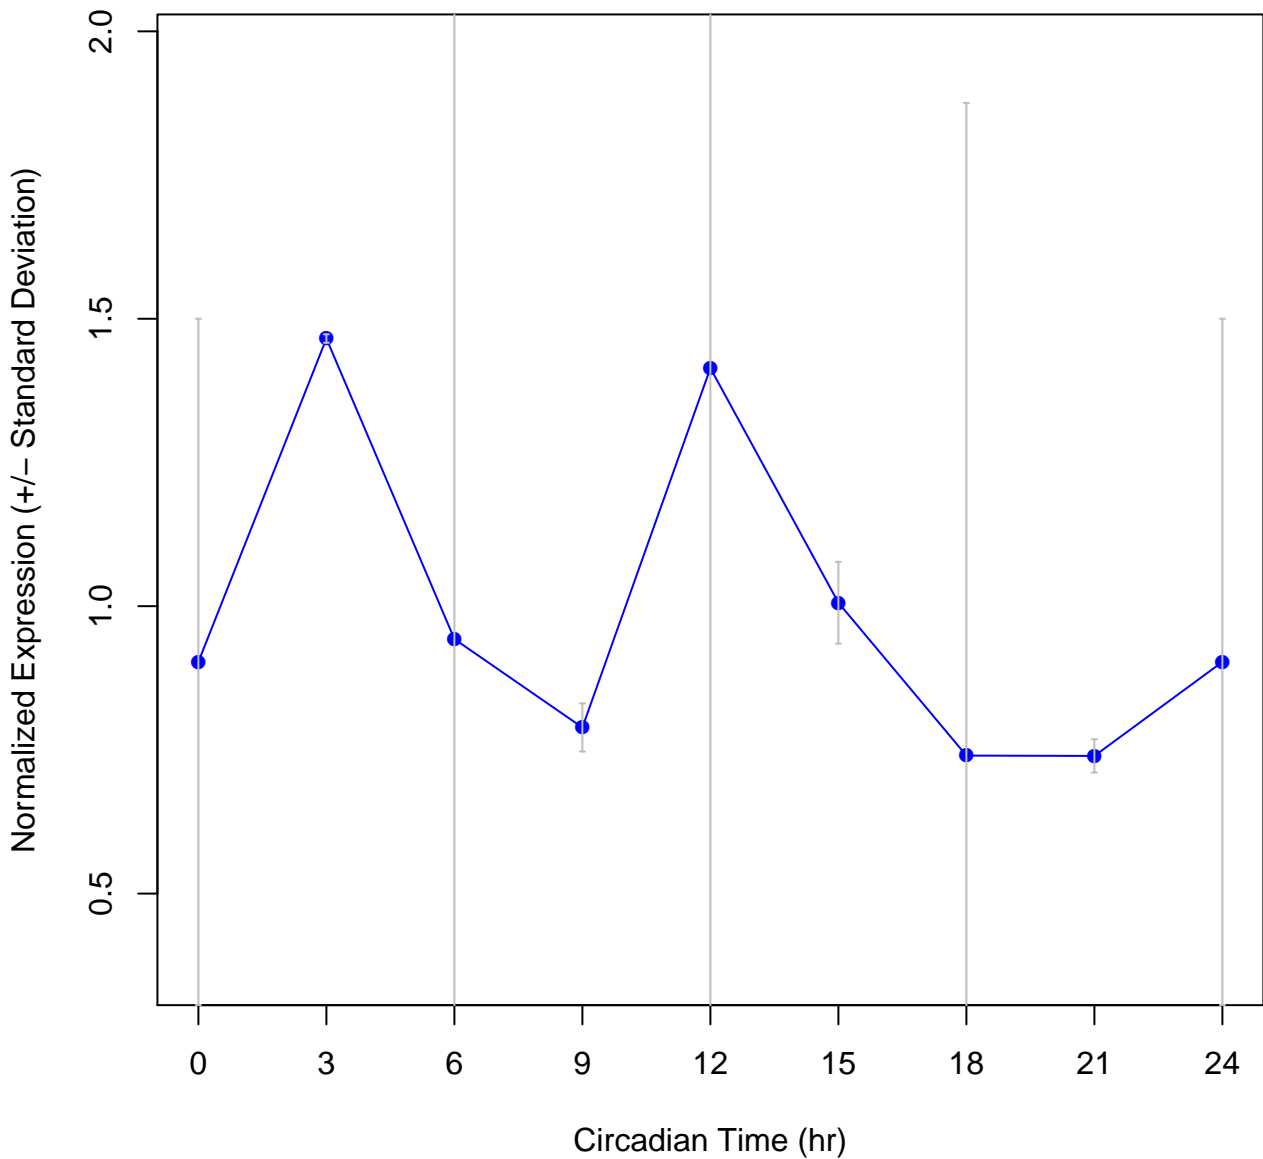

Supplement Figure 5 parpbp

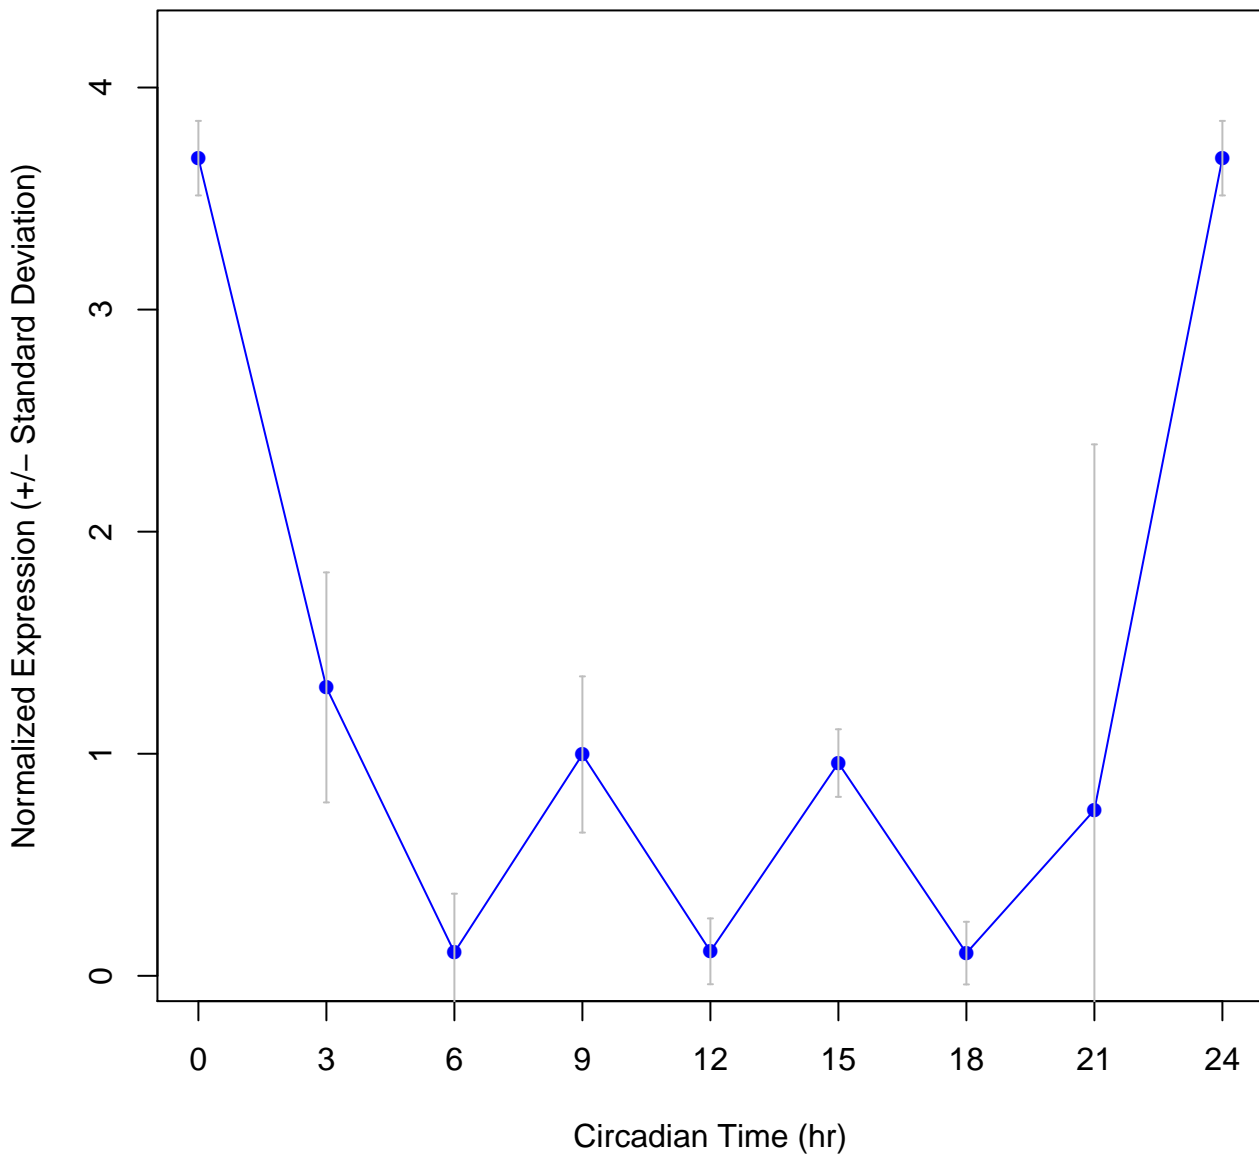

Supplement Figure 5 pcna

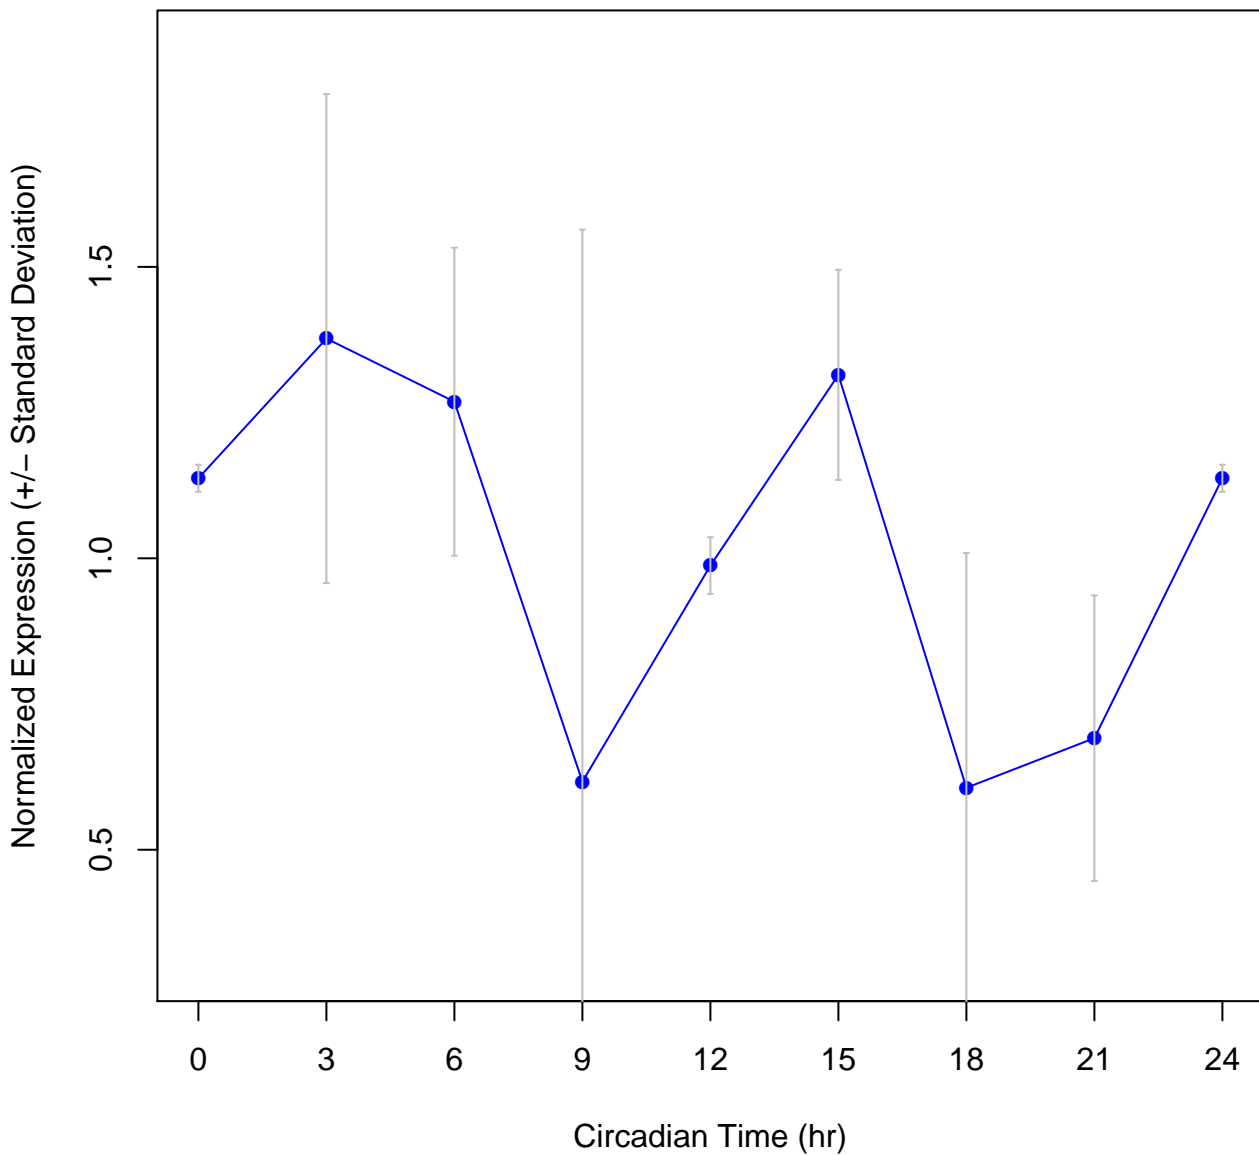

Supplement Figure 5 pcp4

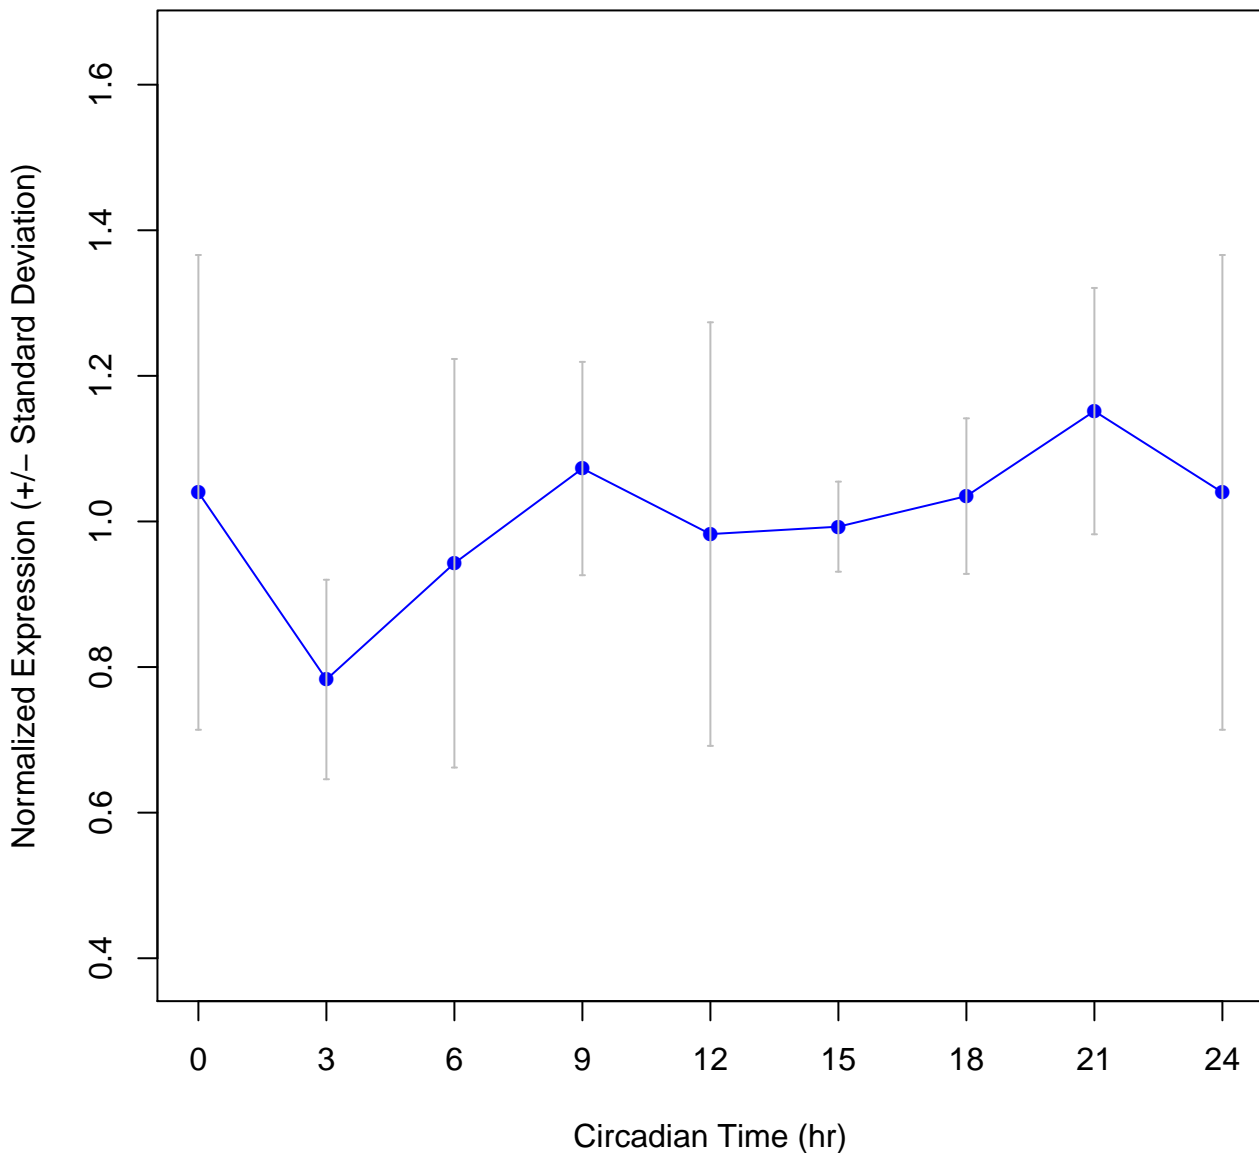

Supplement Figure 5 pdgfc

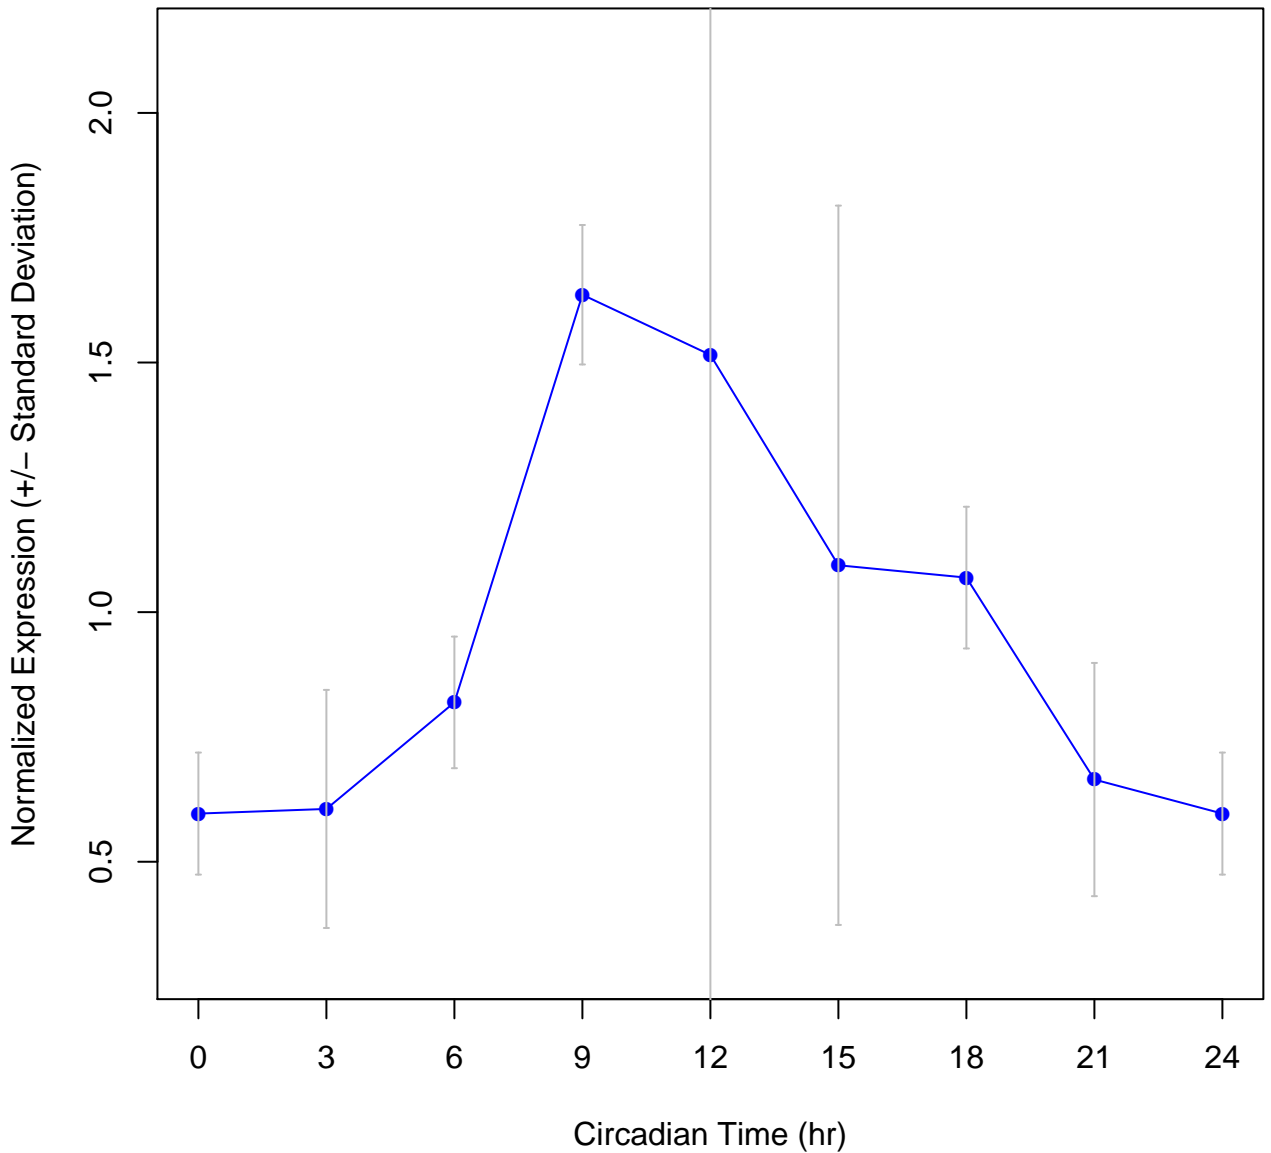



Supplement Figure 5 per1

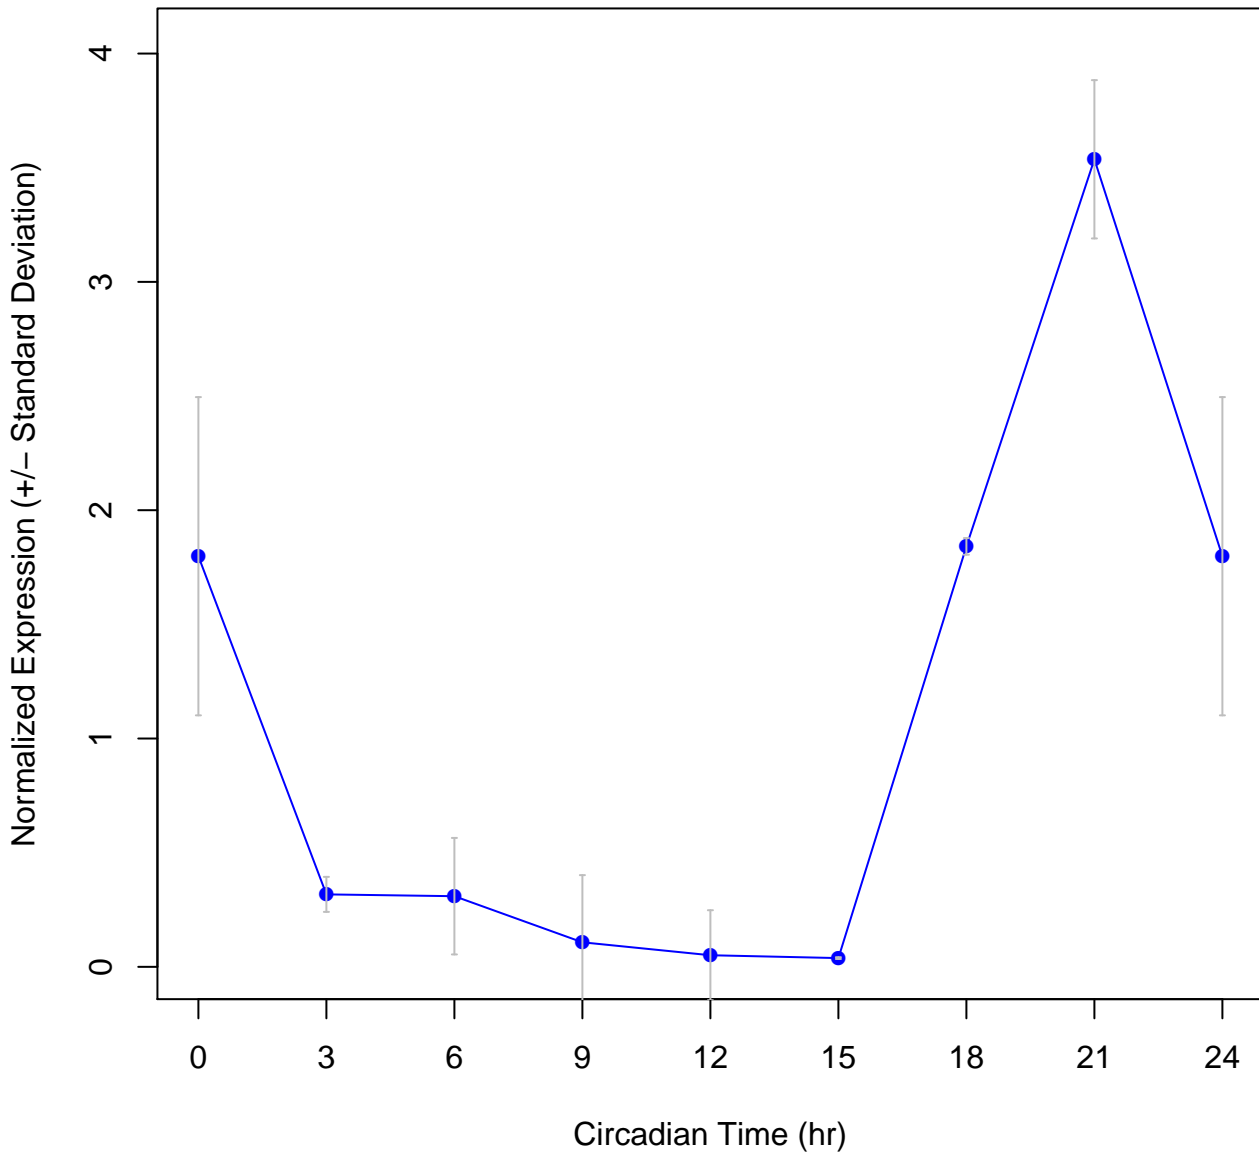

Supplement Figure 5 per2

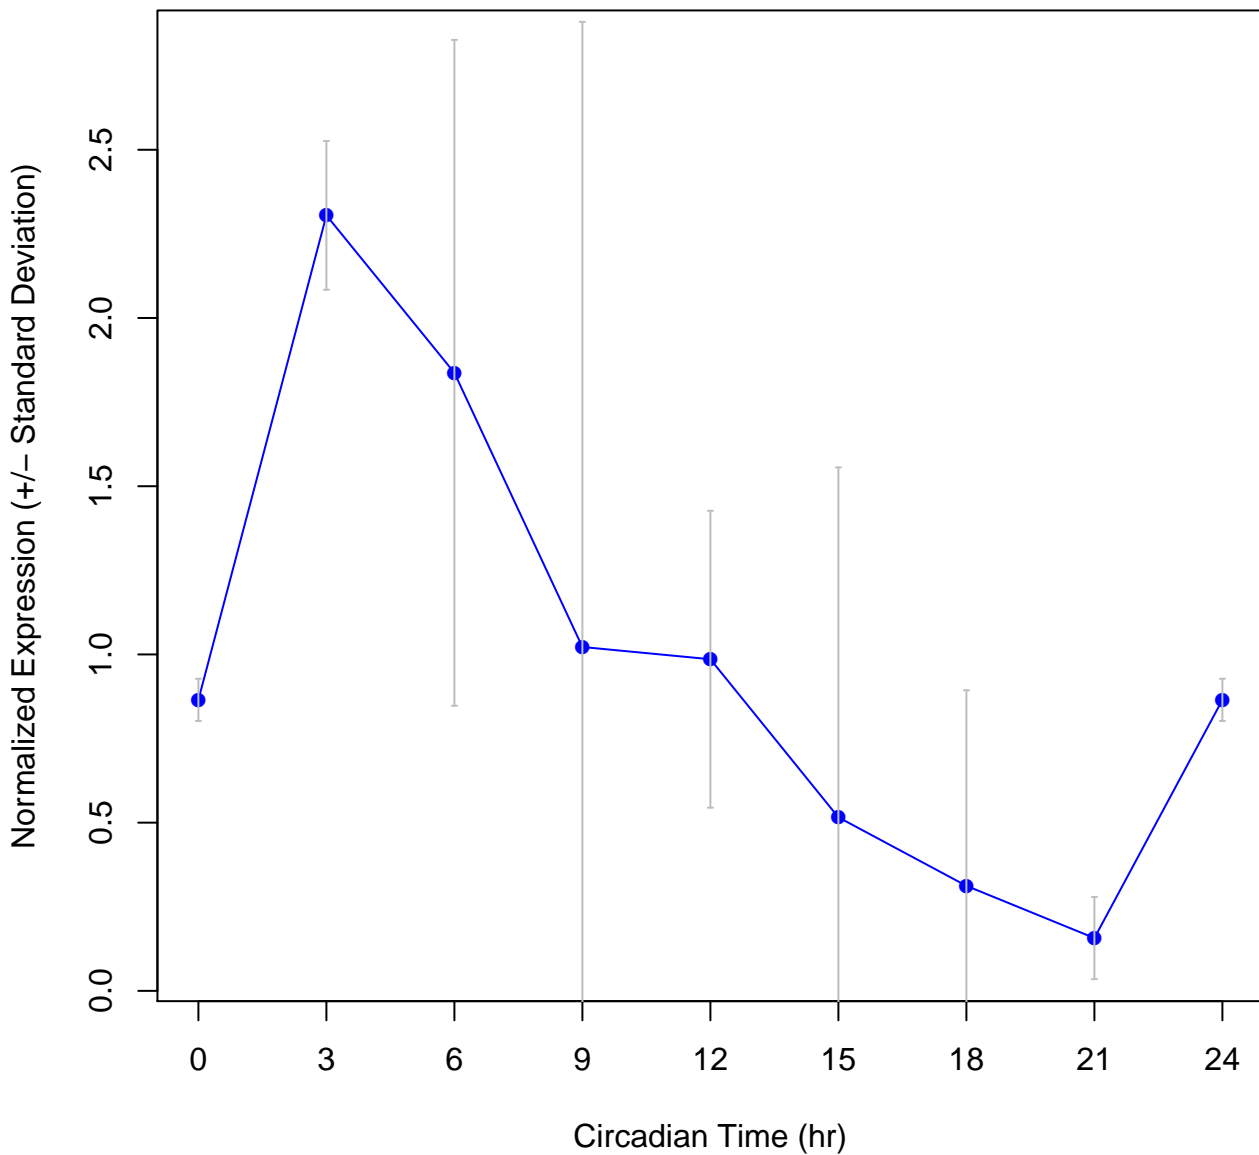

Supplement Figure 5 pfkfb1

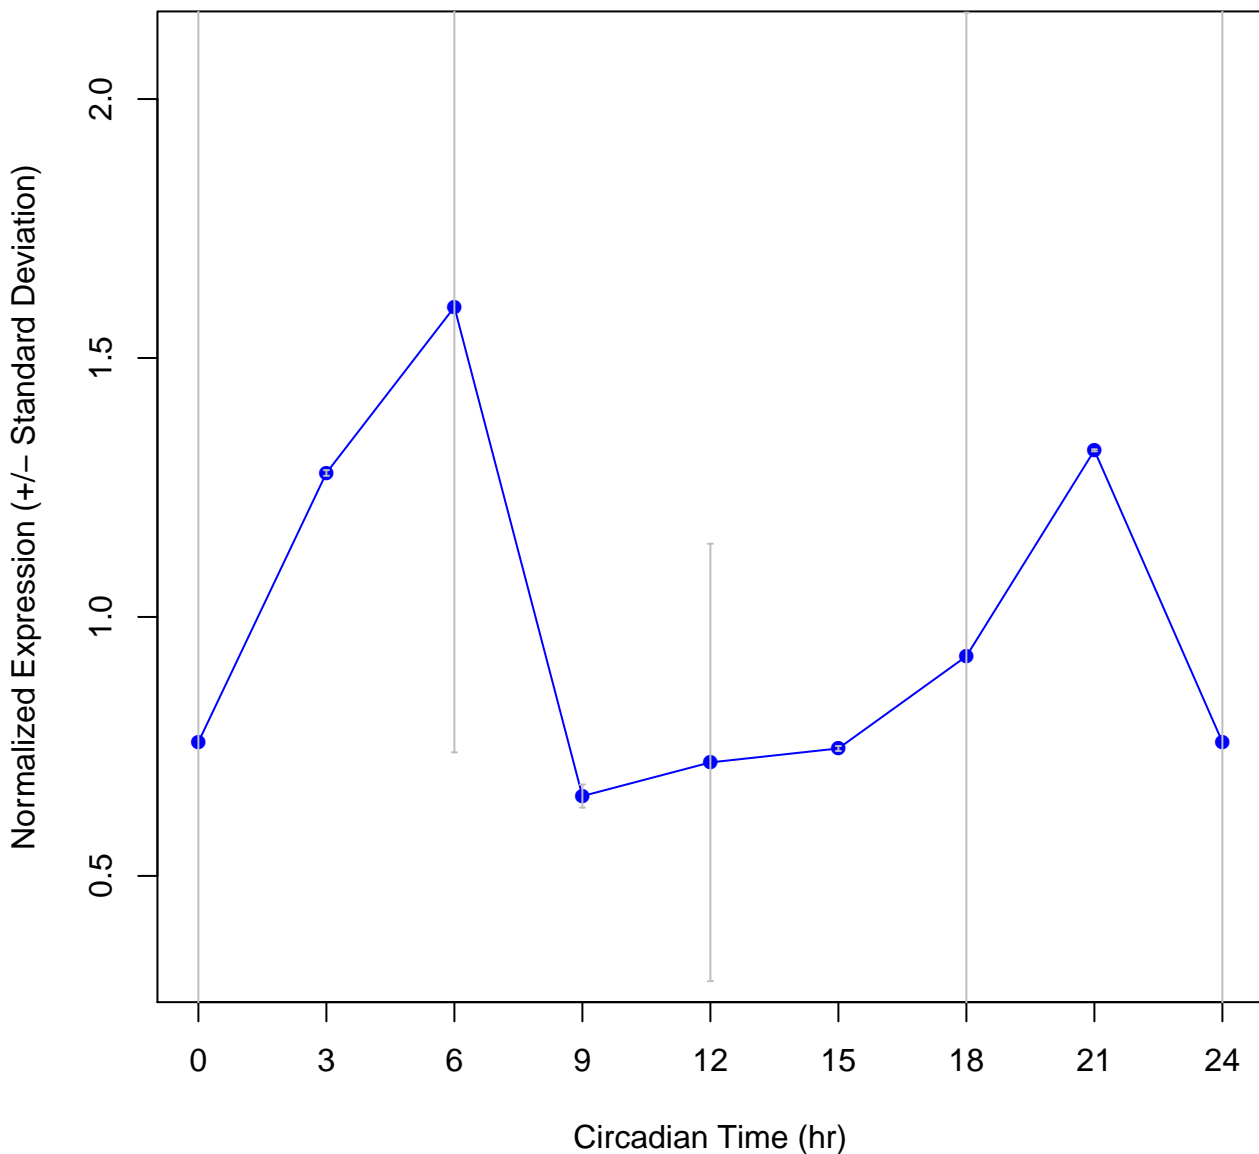

Supplement Figure 5 pif1

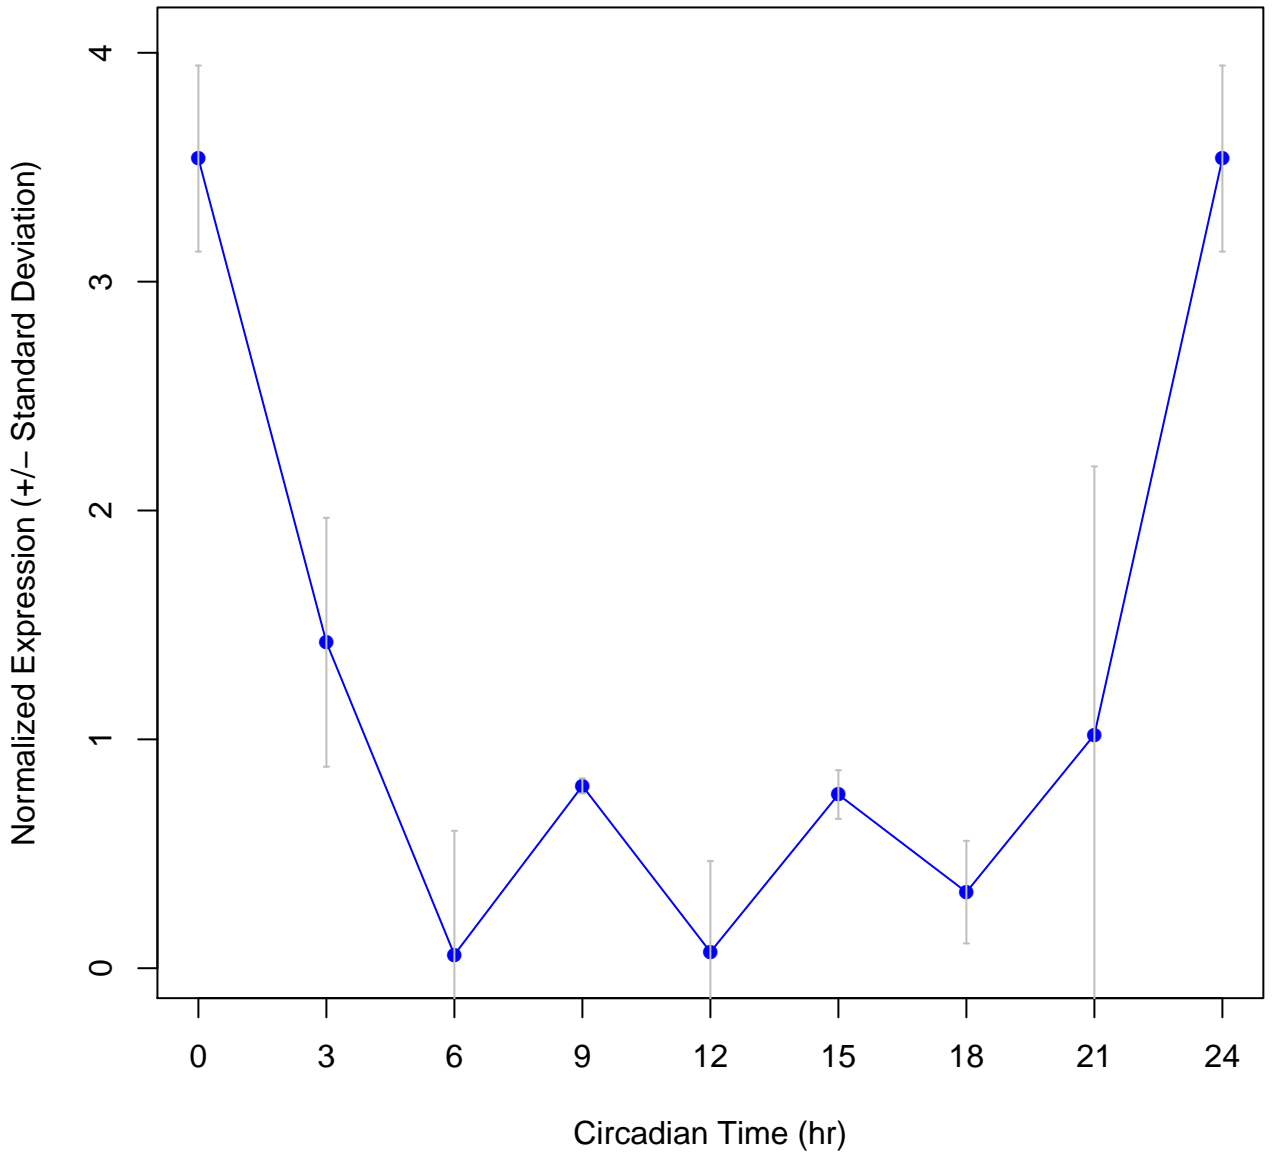

Supplement Figure 5 pik3c2b

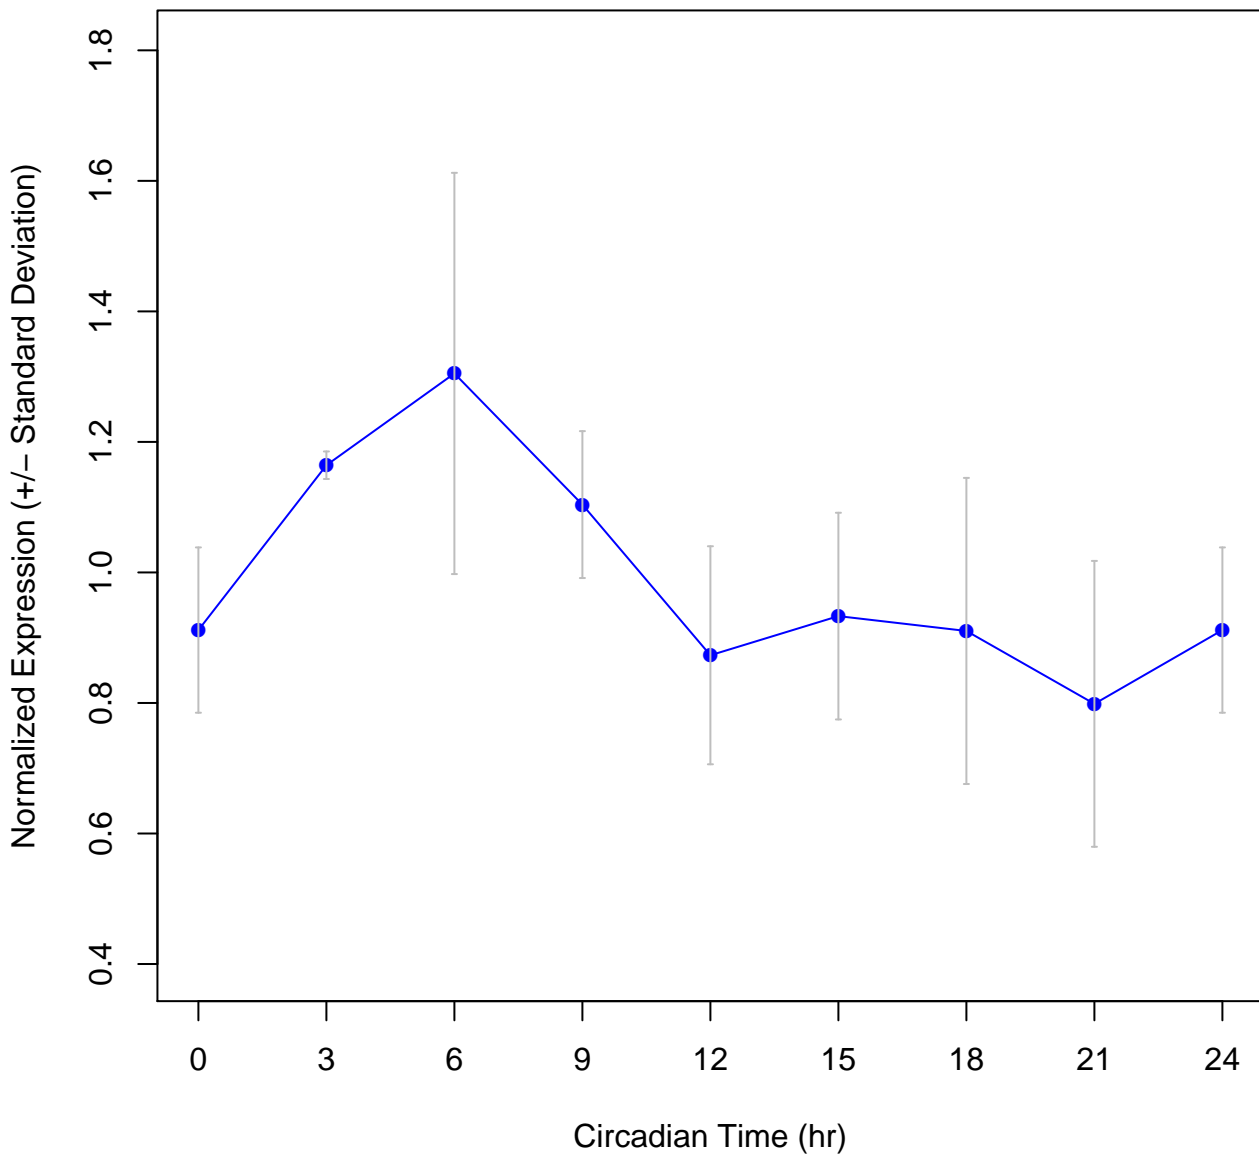

Supplement Figure 5 pkmyt1

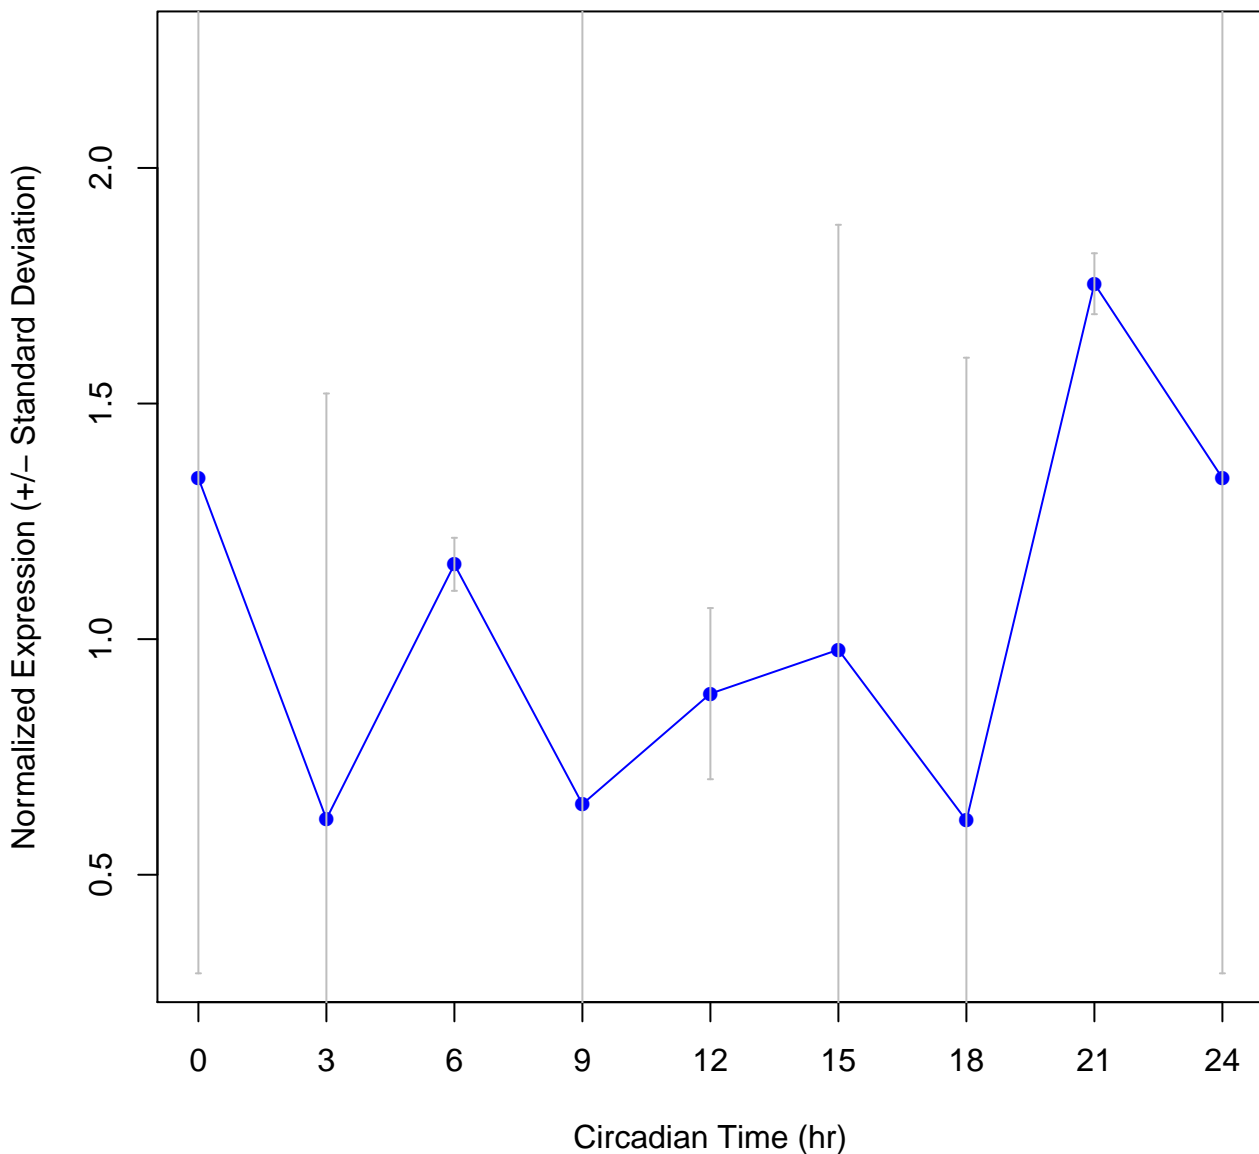

Supplement Figure 5 plcb1

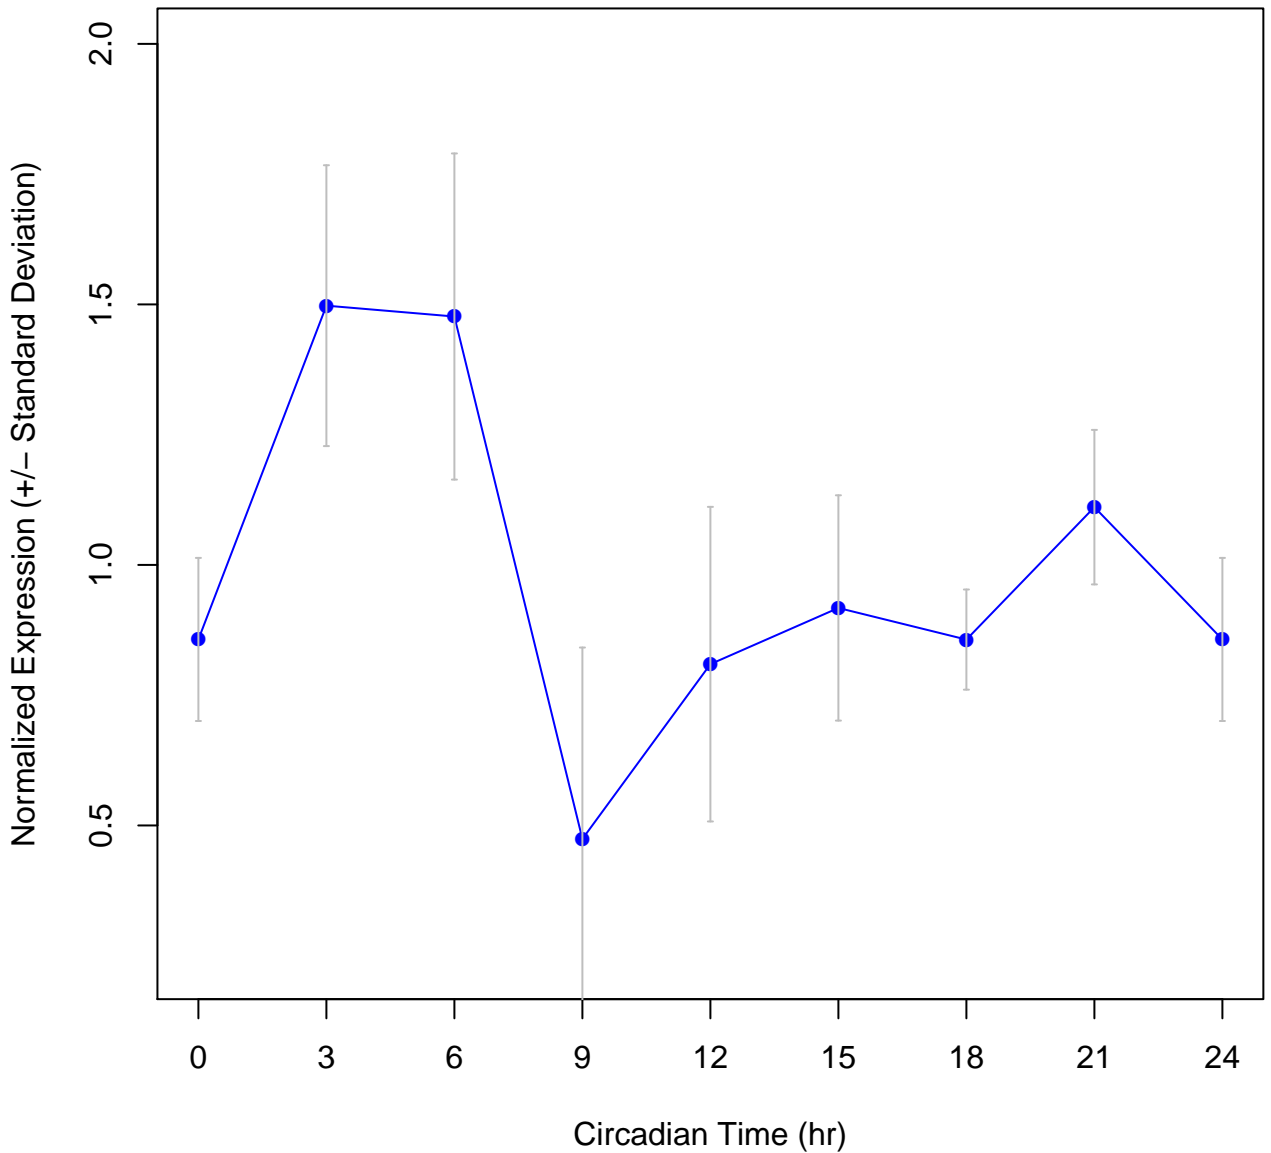

# Supplement Figure 5 *plcd1*

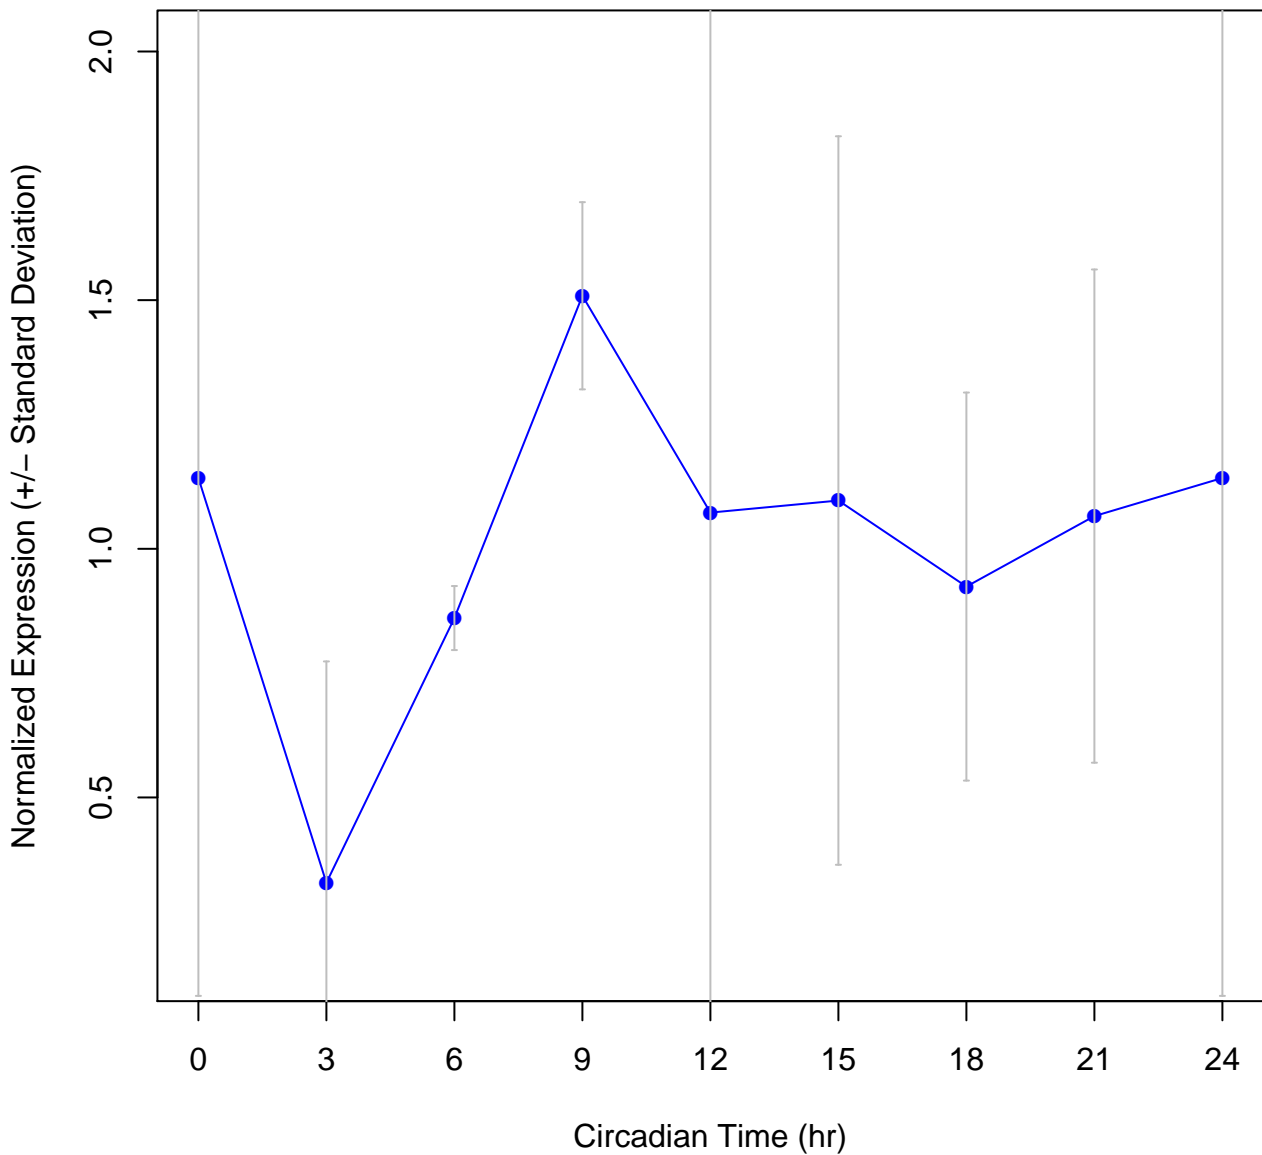



Supplement Figure 5 plch2

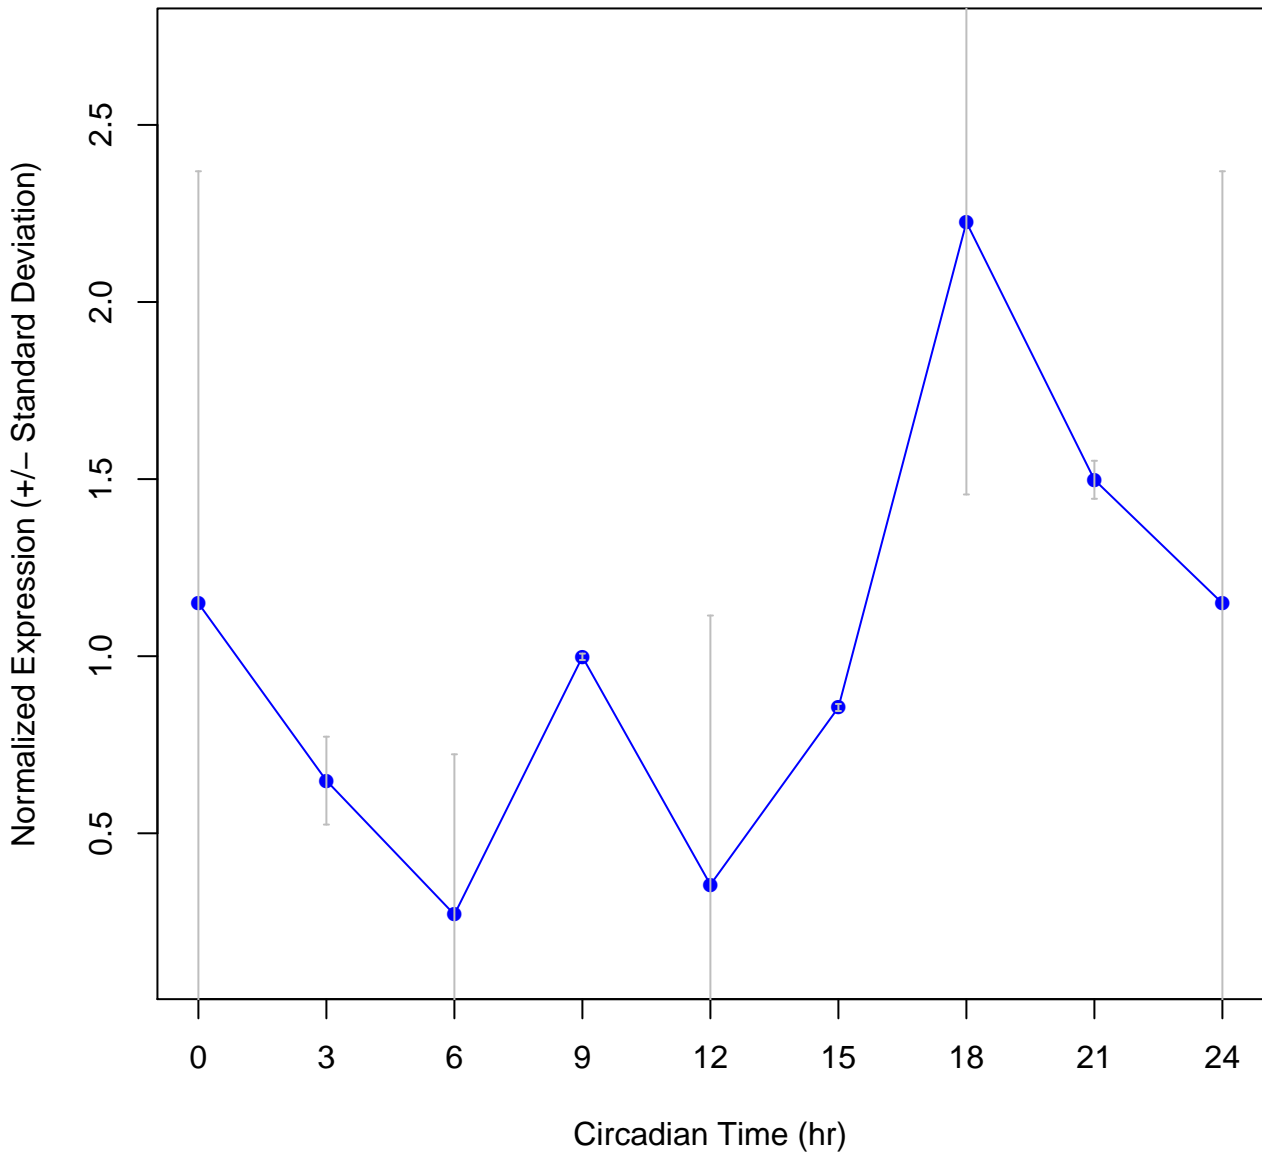

Supplement Figure 5 plk1

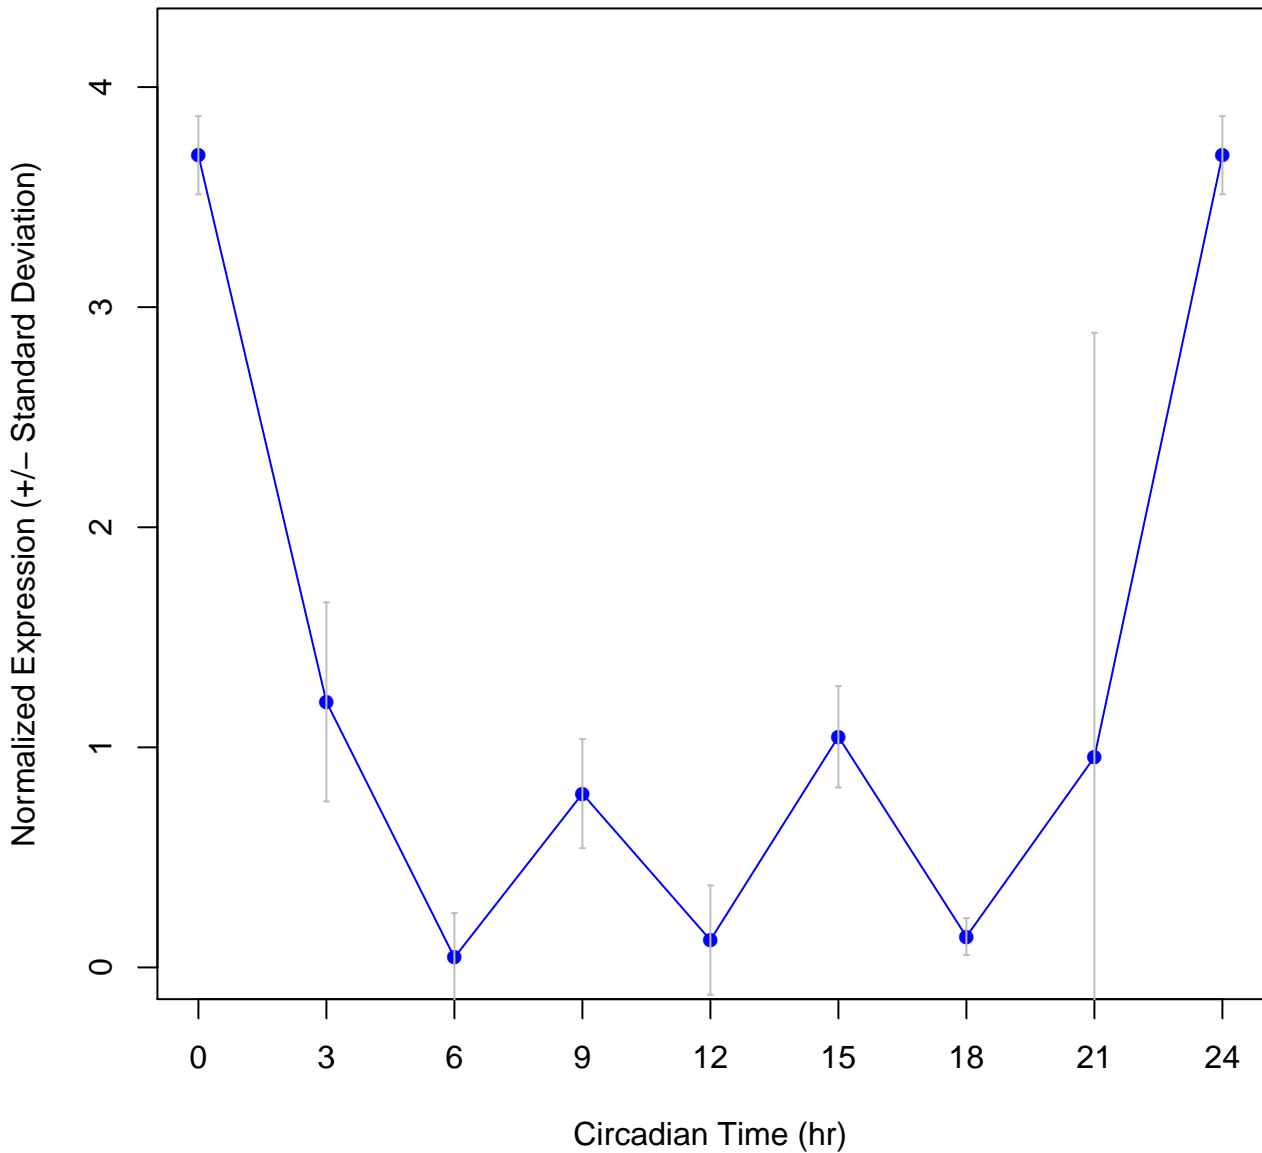

Supplement Figure 5 polr2a

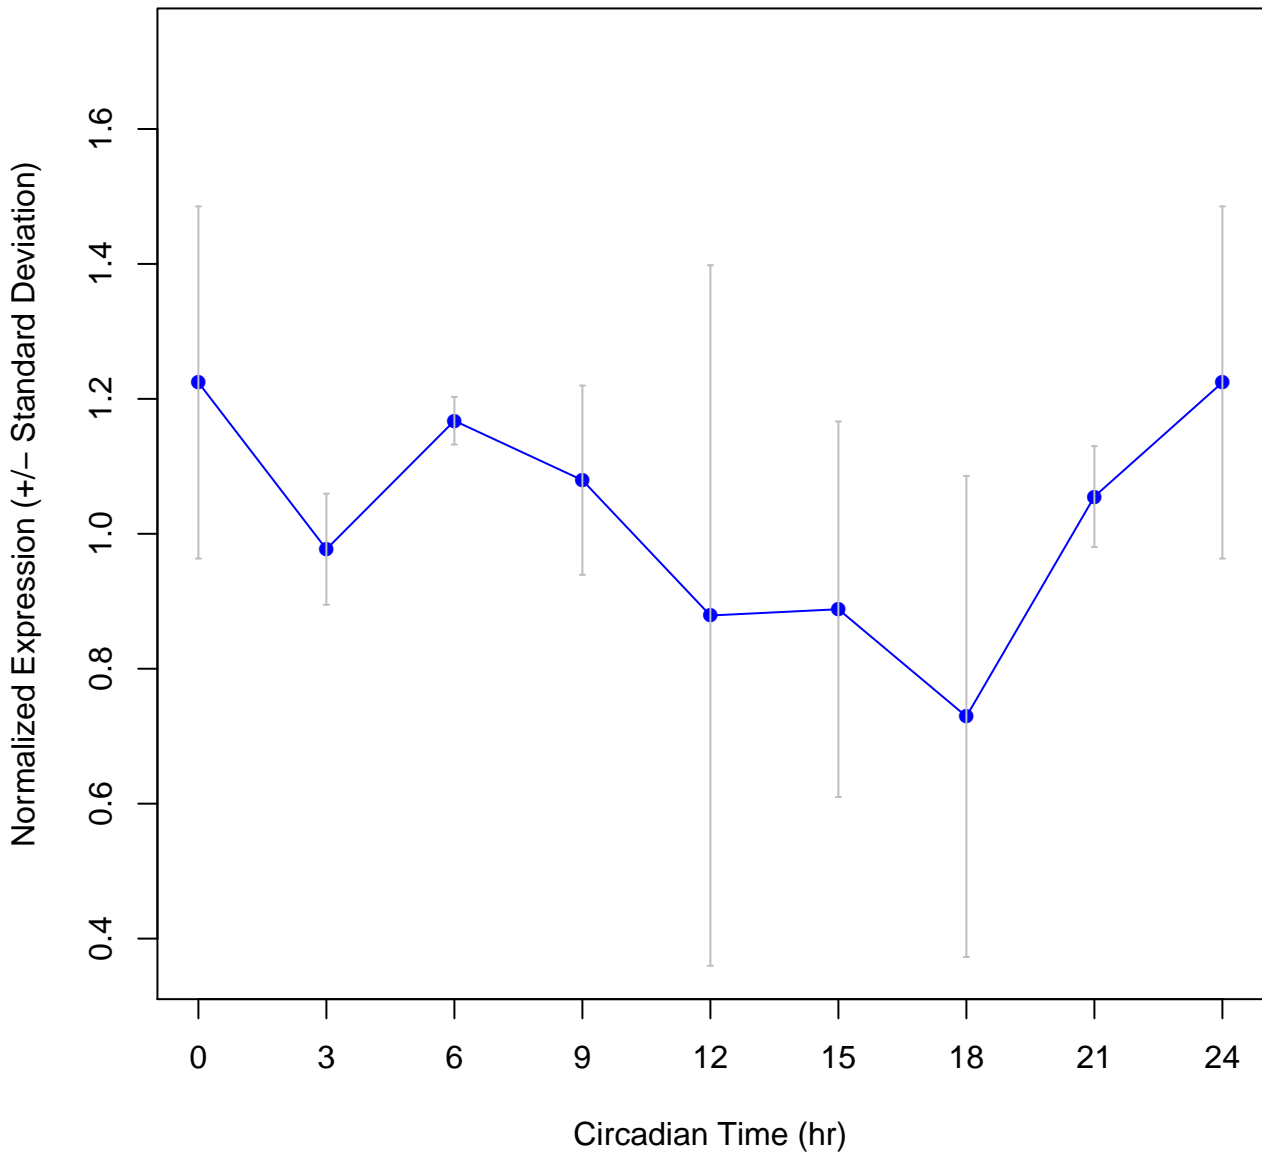

Supplement Figure 5 pomc

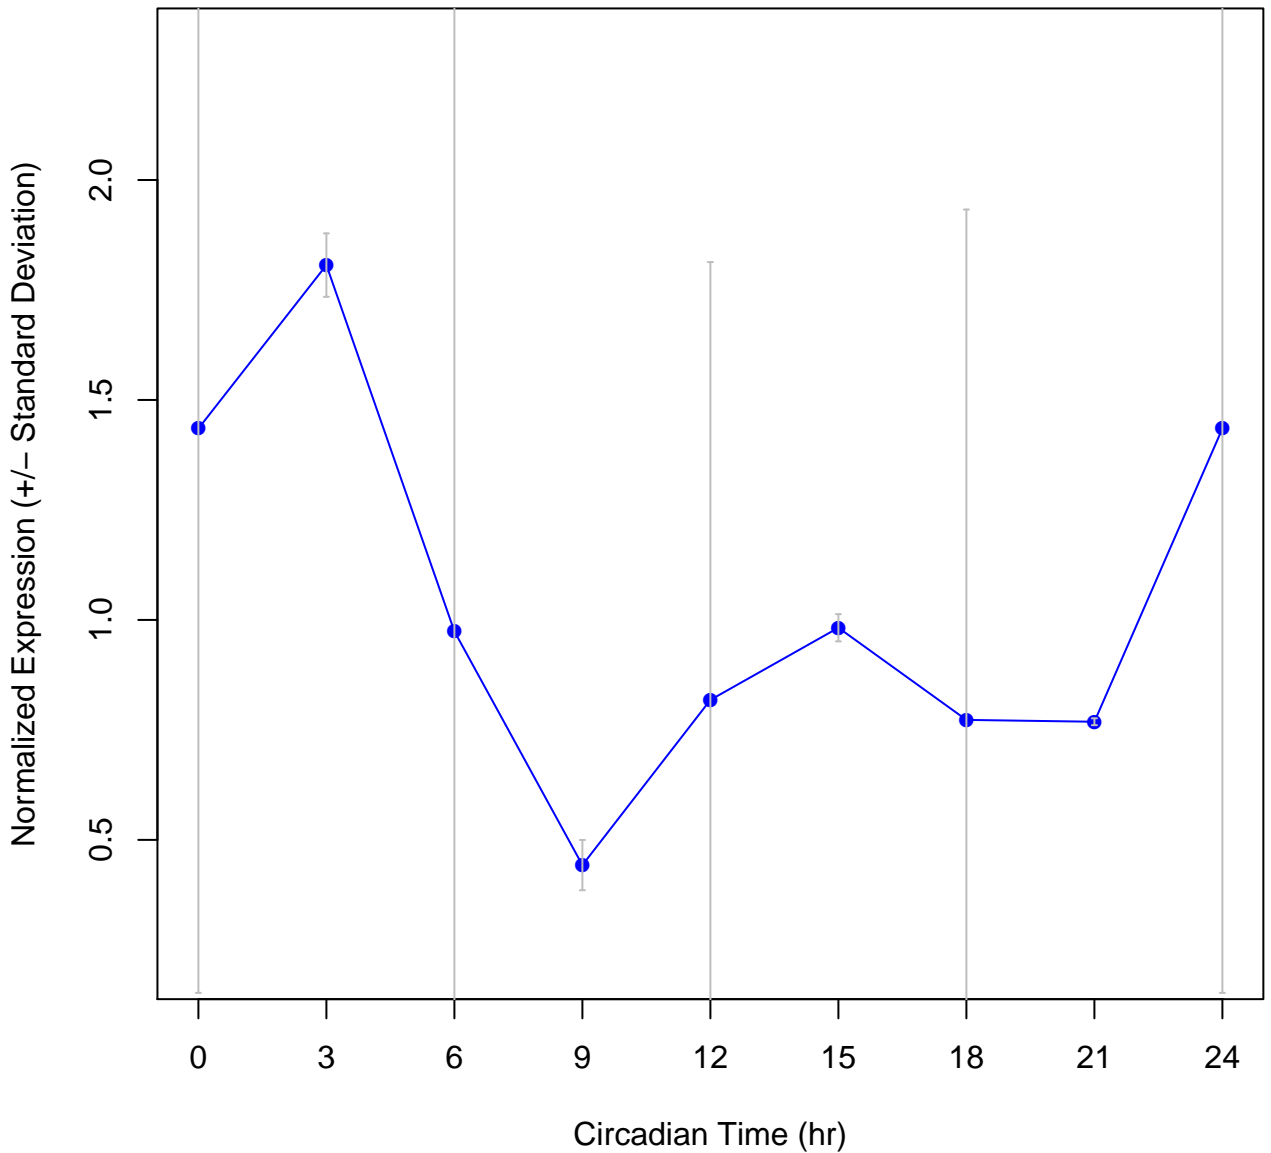

## Supplement Figure 5 pparaa

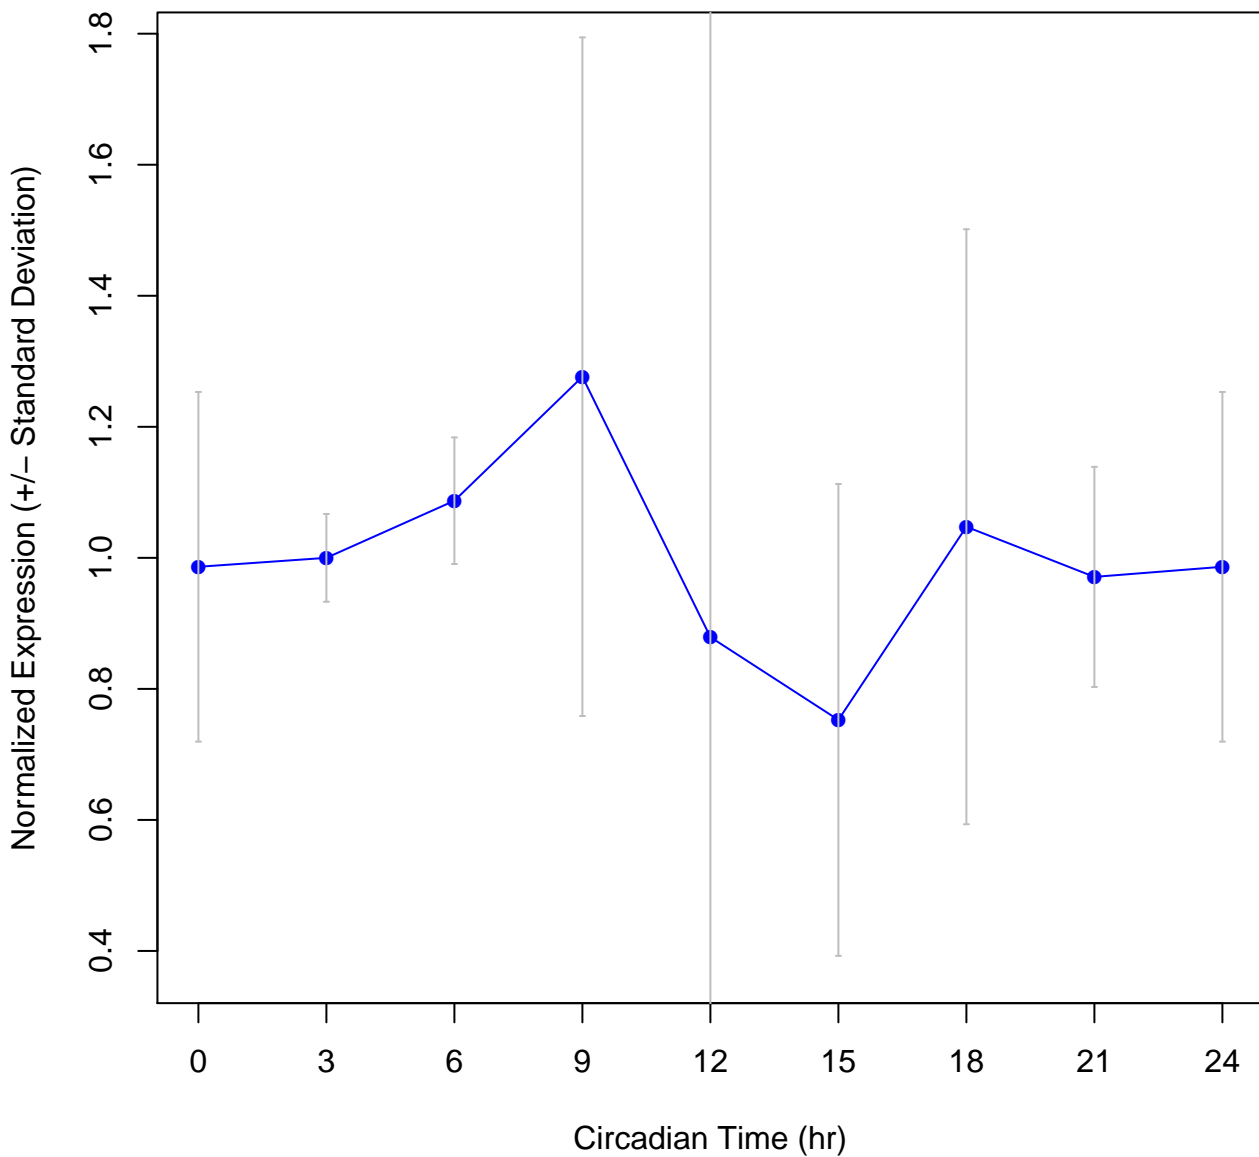

Supplement Figure 5 pparab

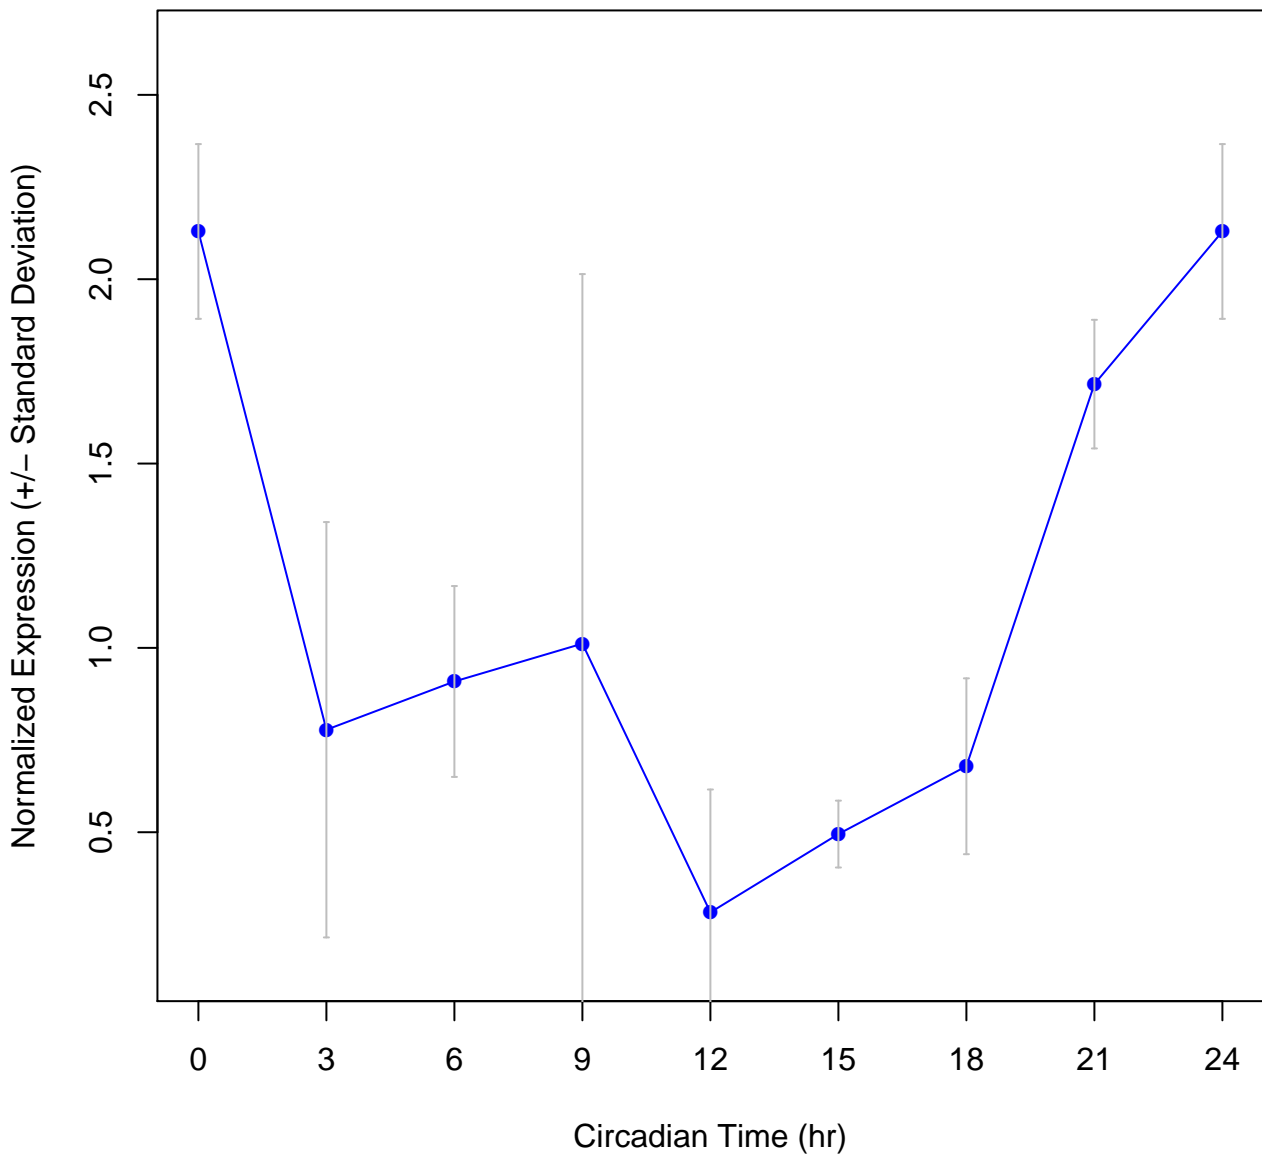

Supplement Figure 5 ppargc1a

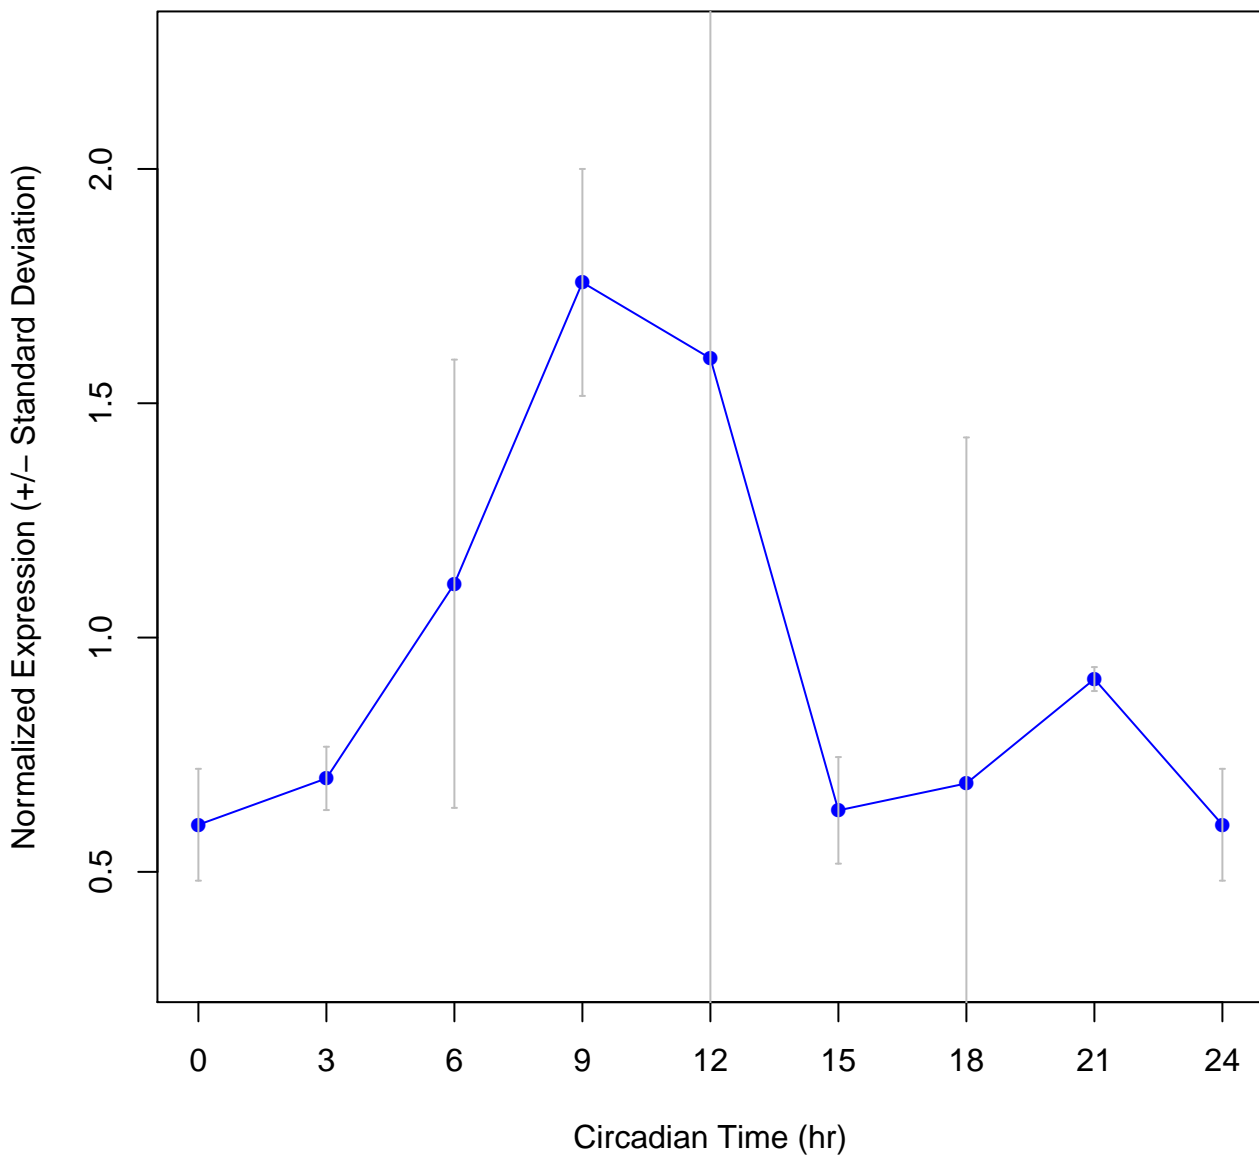

Supplement Figure 5 ppp1r27

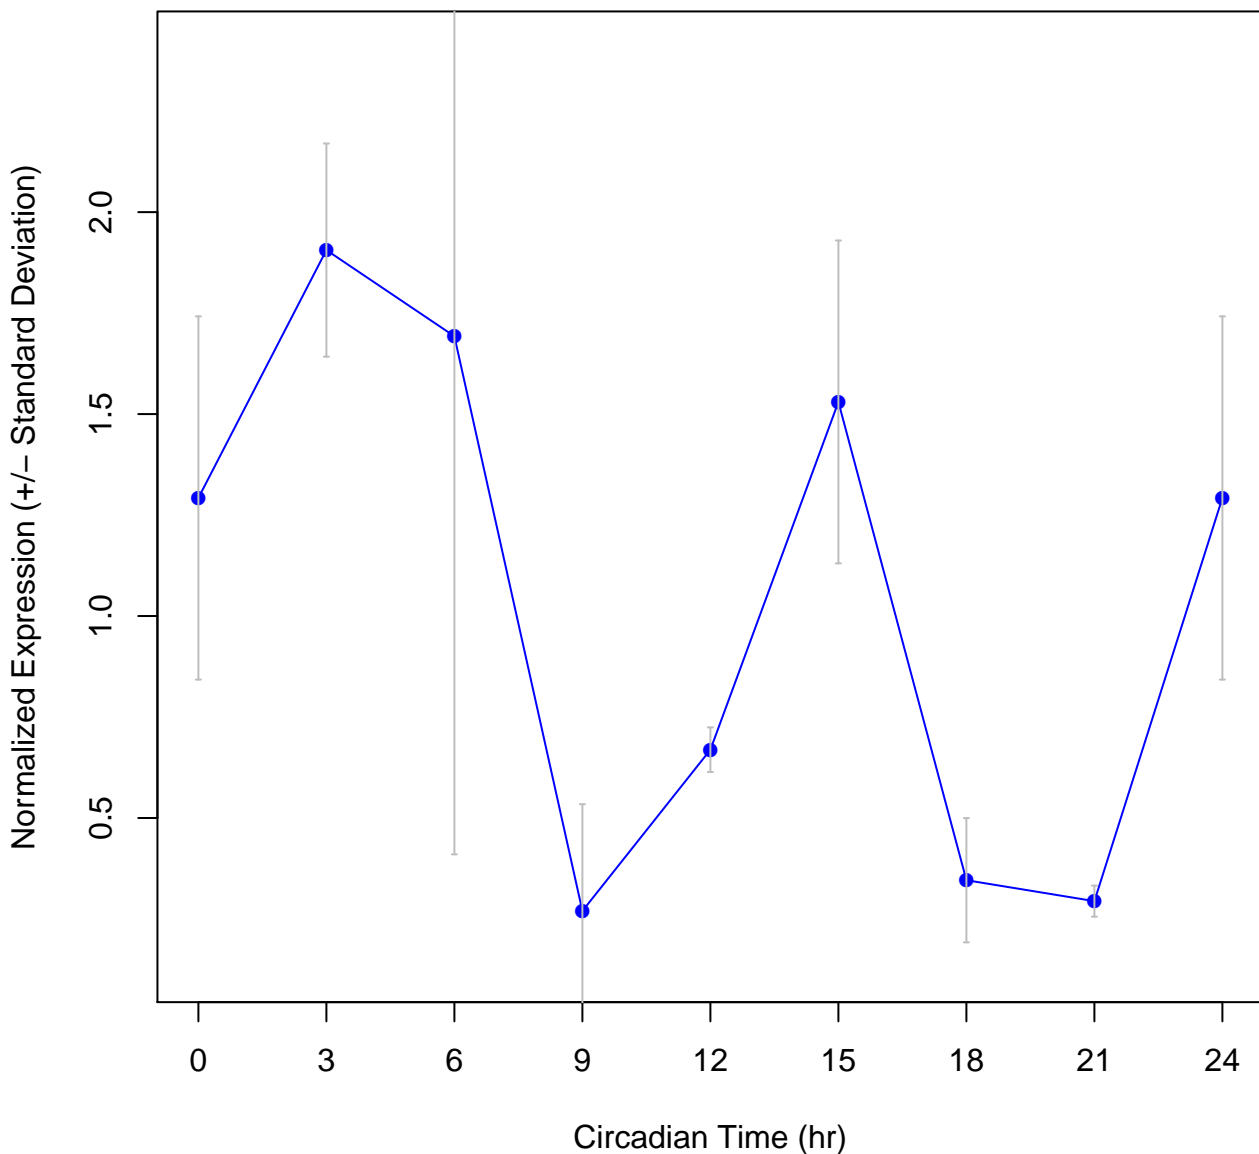



Supplement Figure 5 prc1

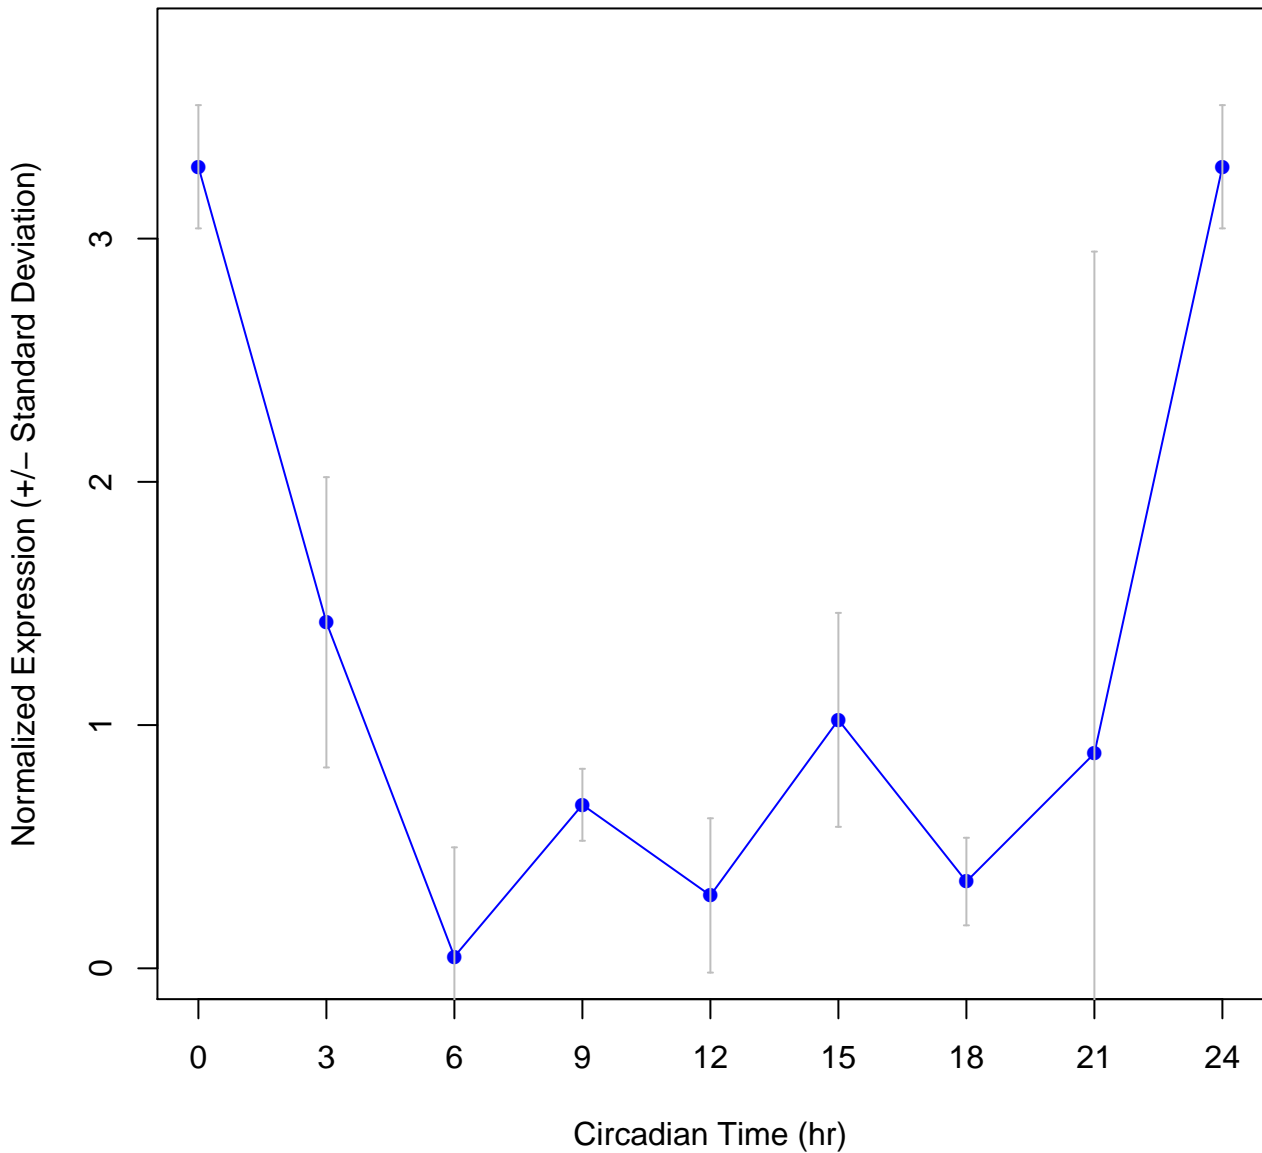

Supplement Figure 5 prkaa2

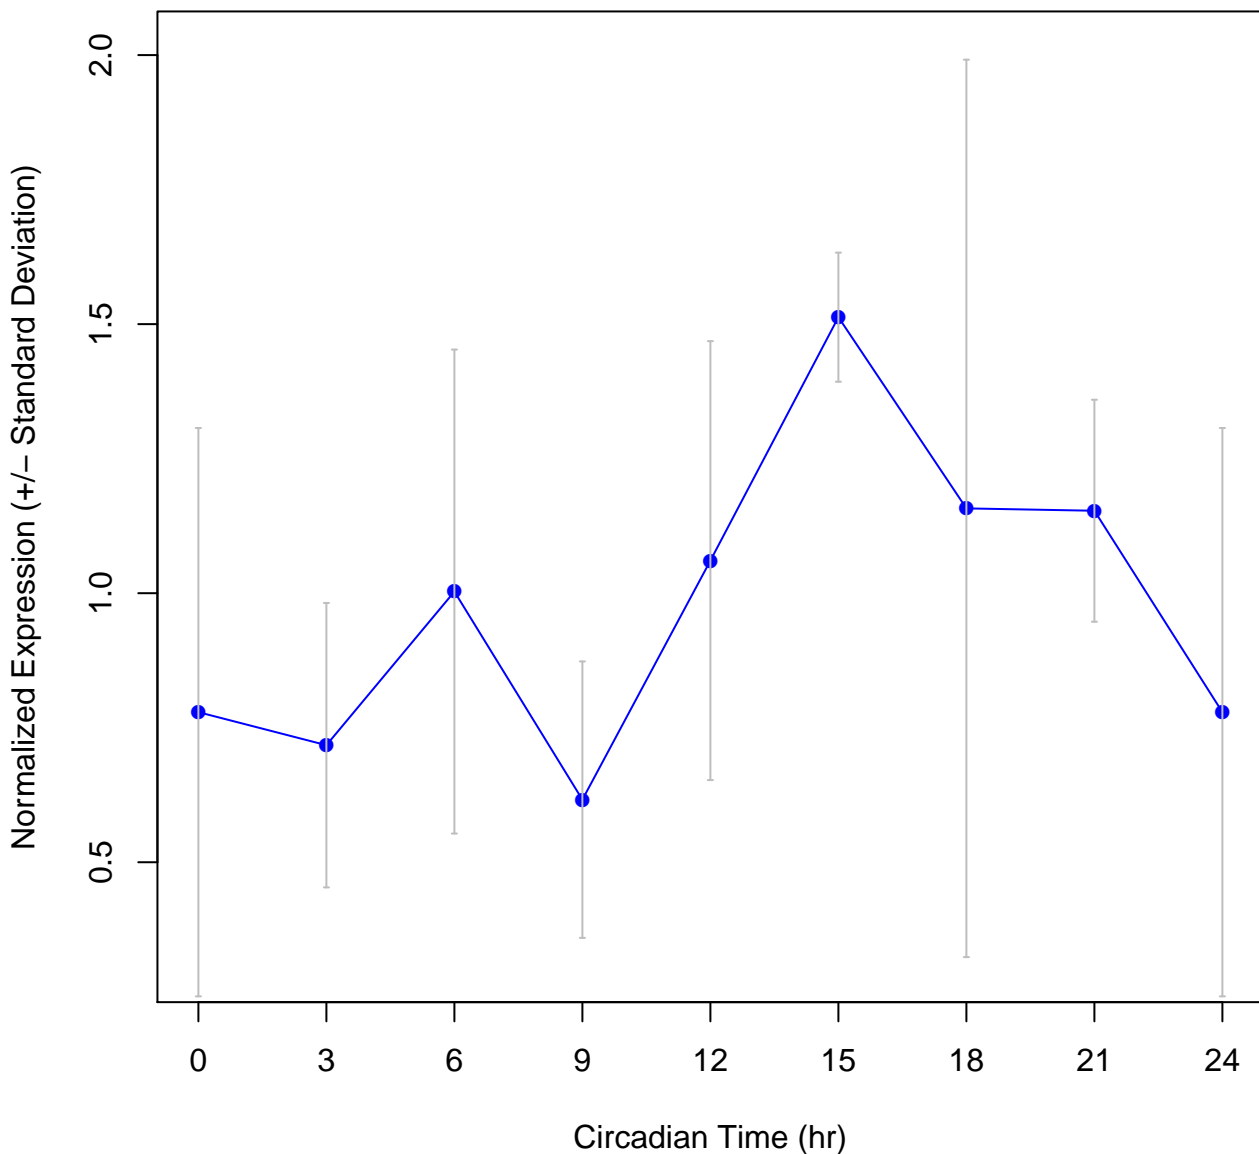

Supplement Figure 5 prkar2a

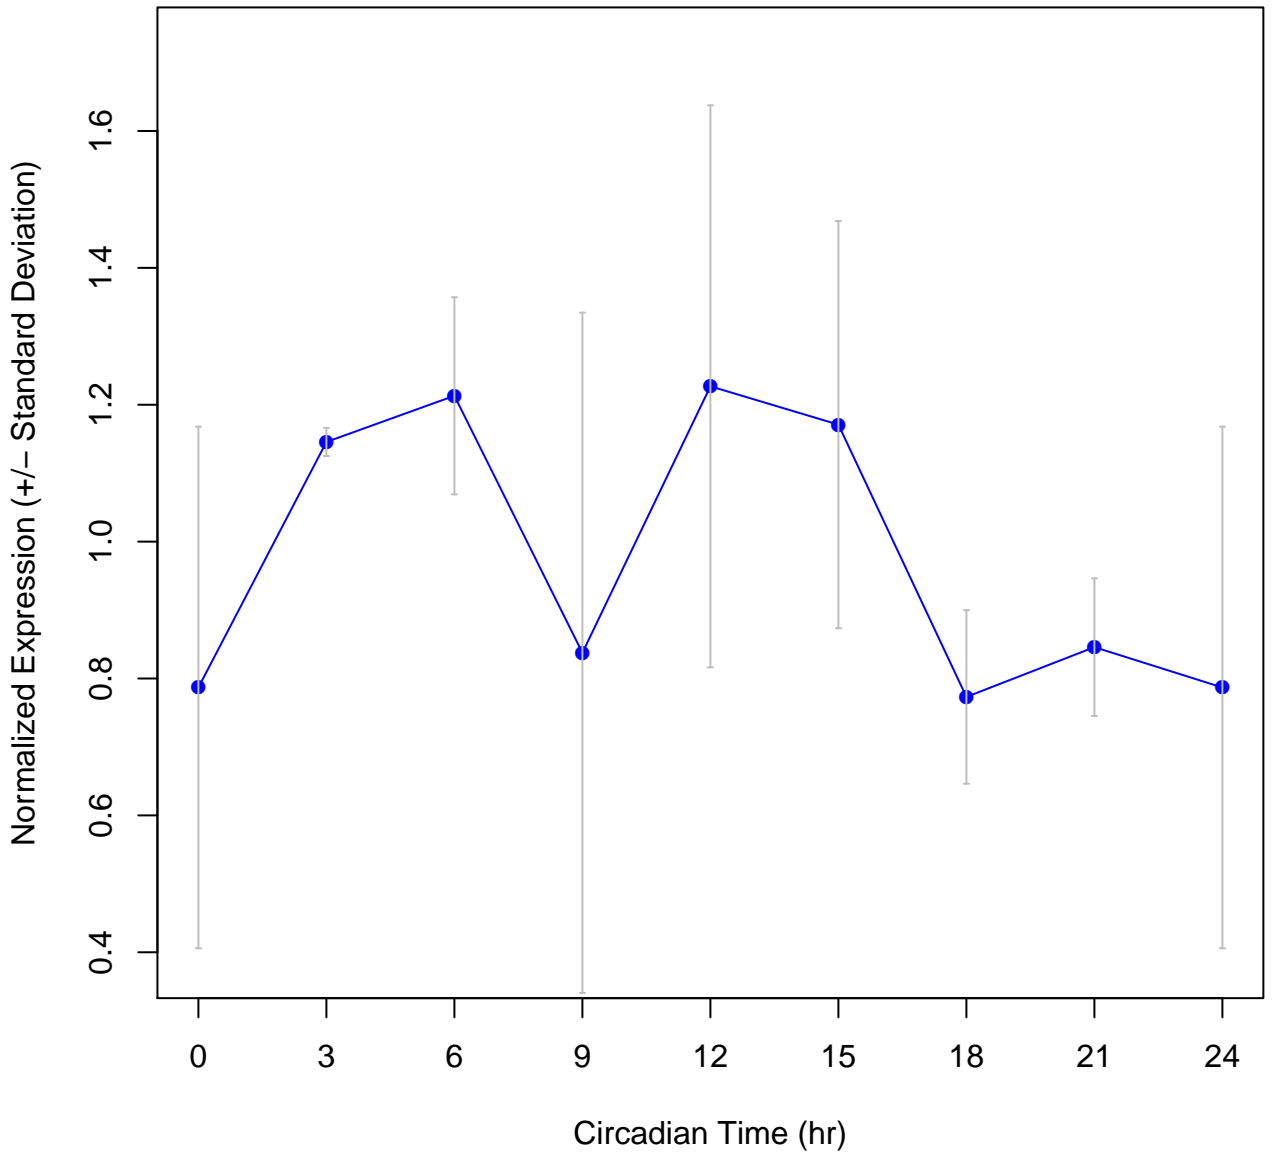

Supplement Figure 5 prkca\_1

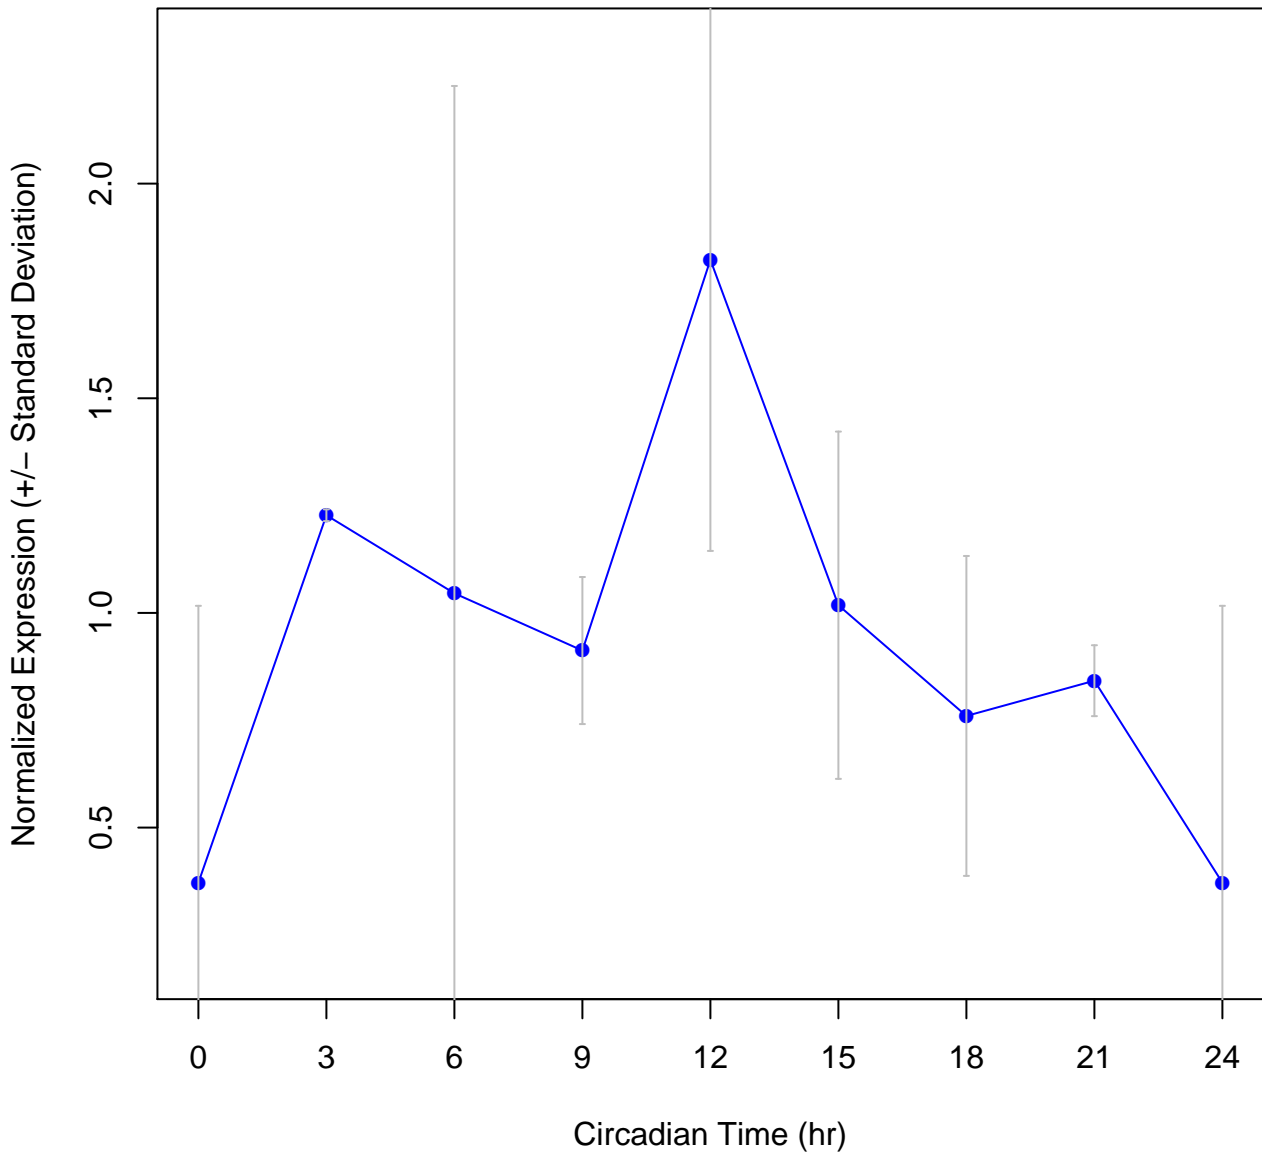

Supplement Figure 5 prkca\_2

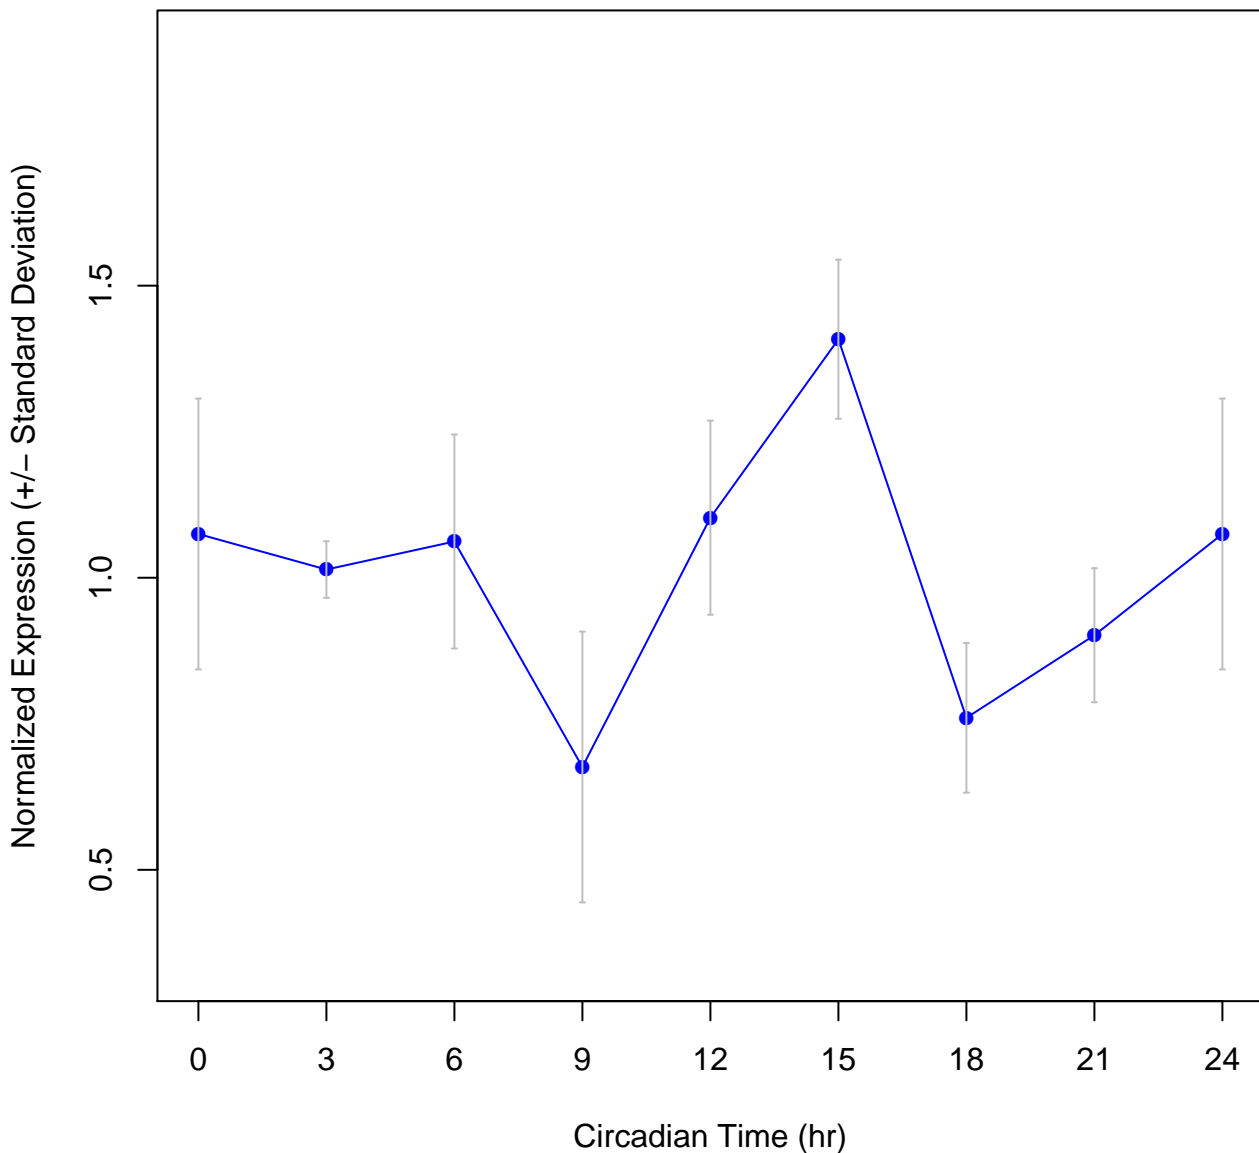

Supplement Figure 5 prkcb

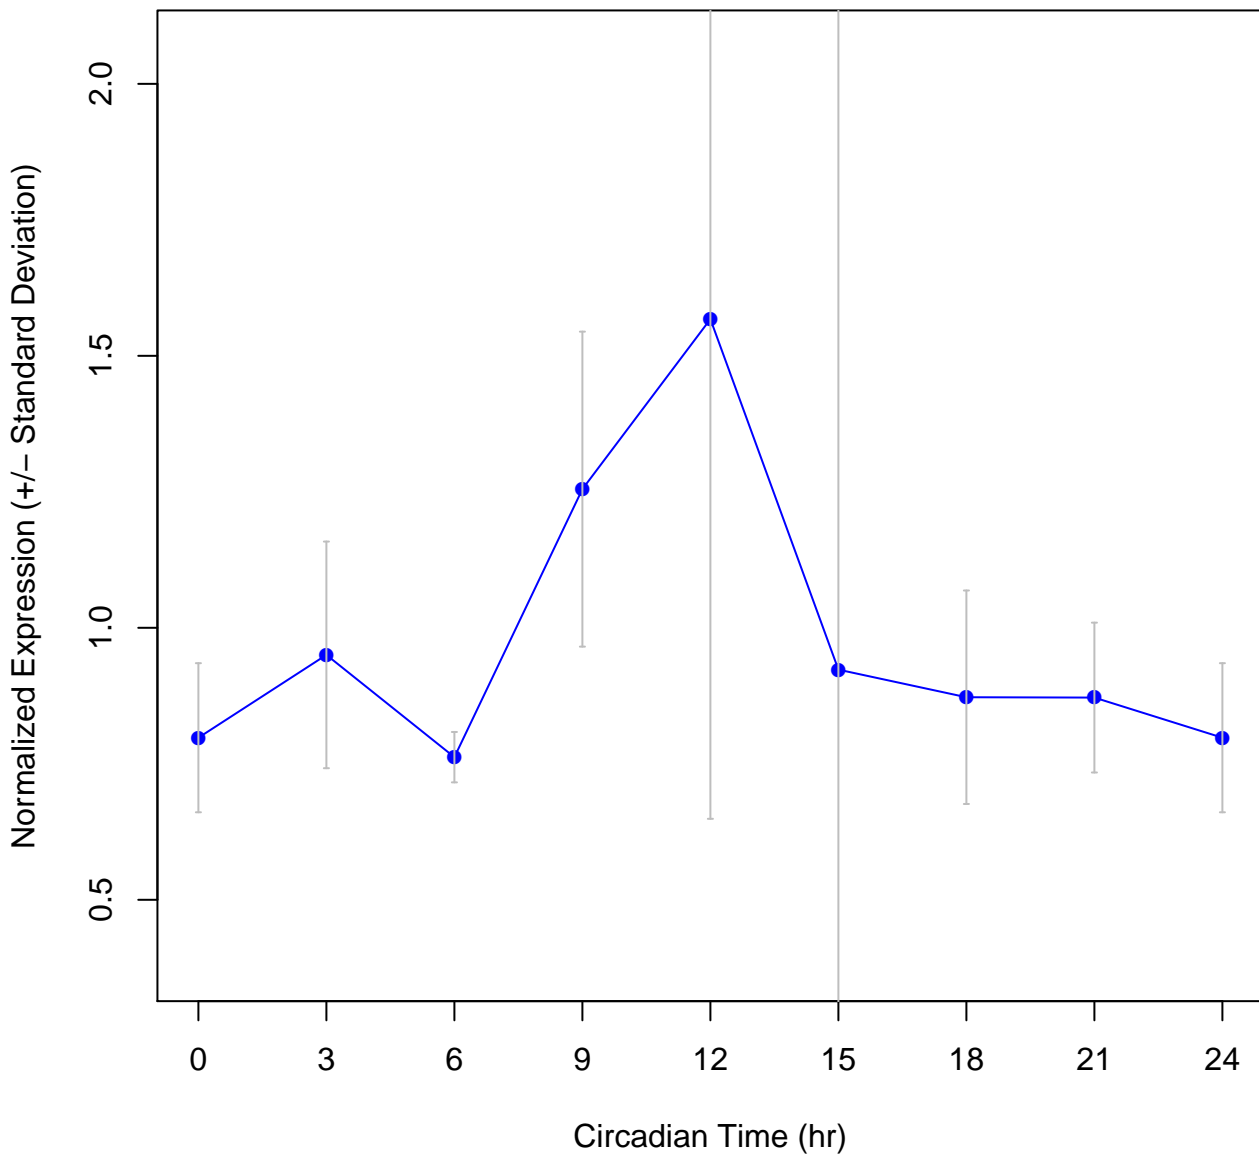

Supplement Figure 5 prkdc

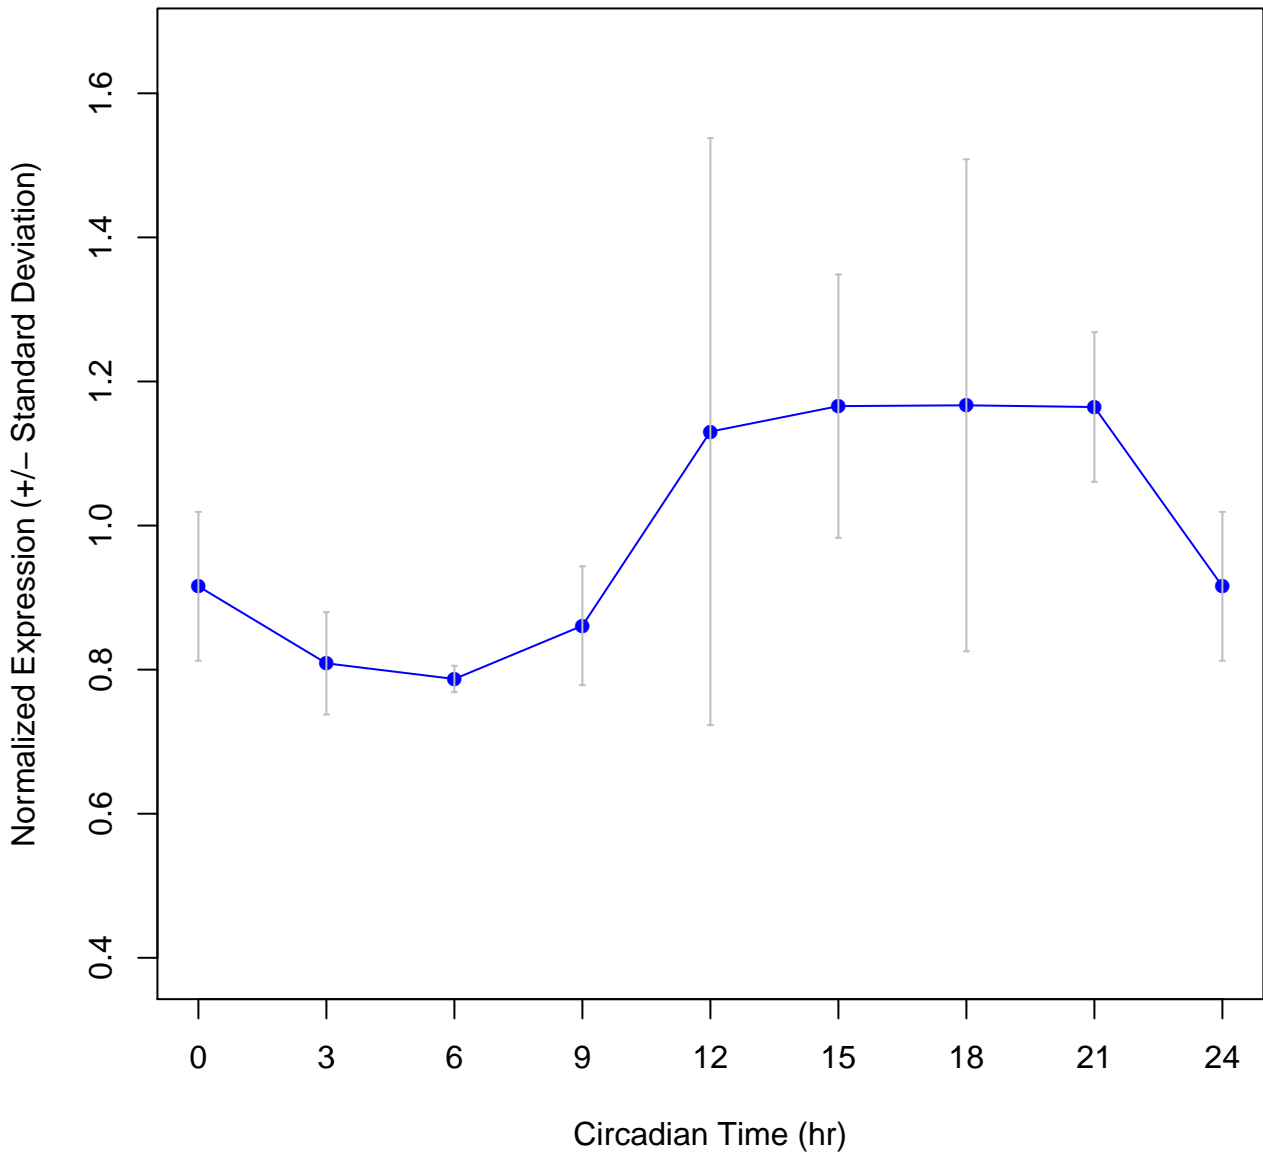

**Supplement Figure 5 rab3b**

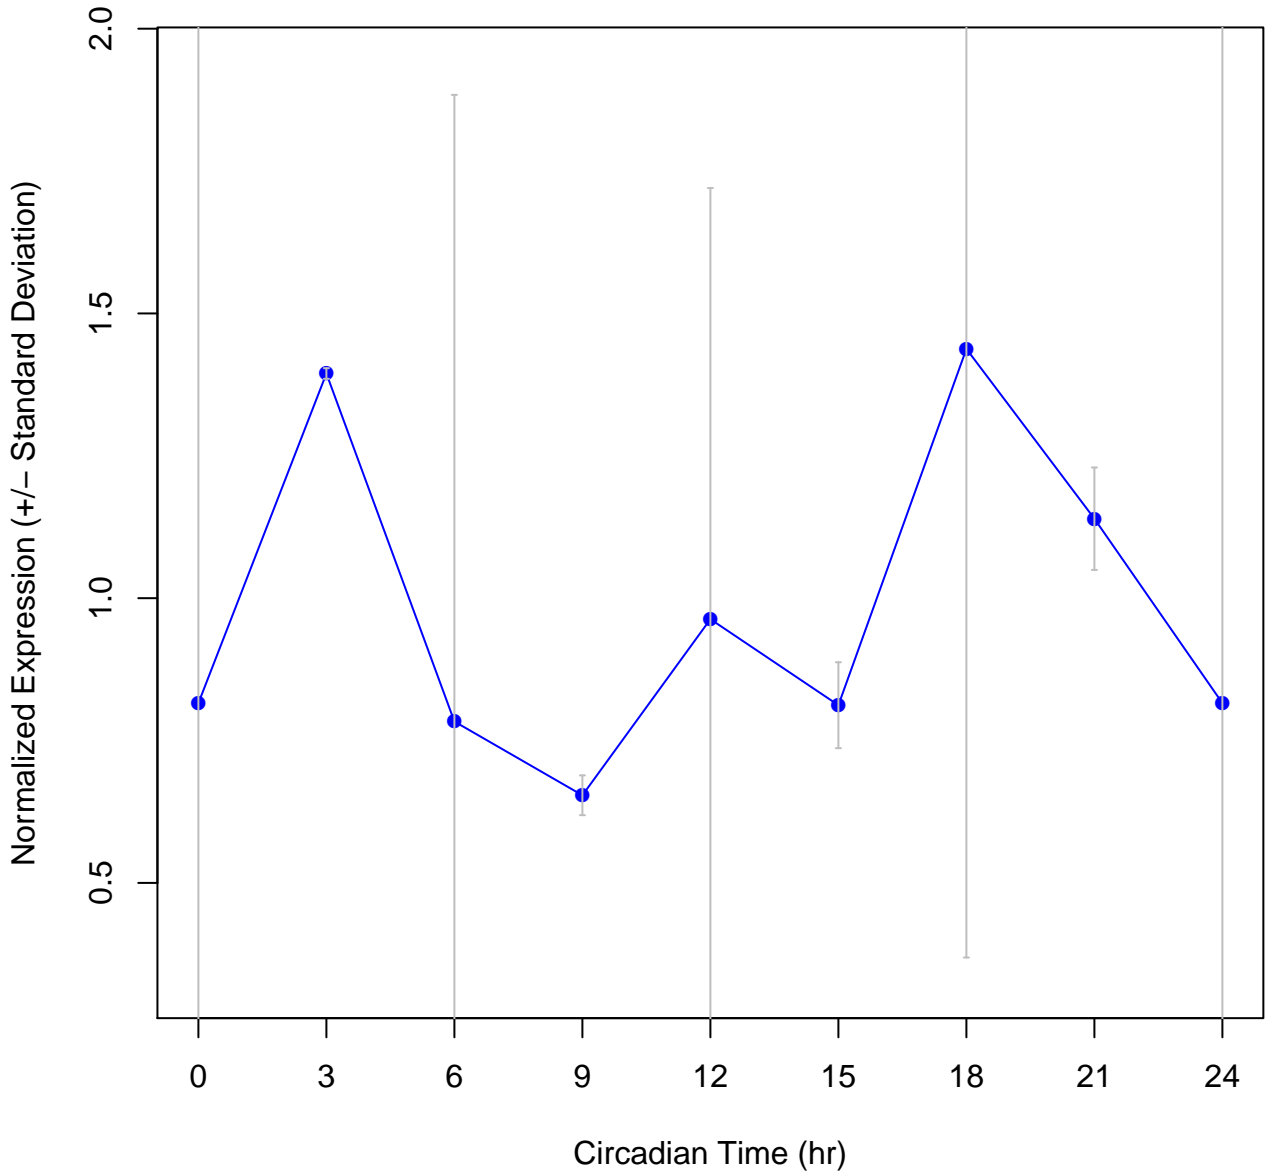



Supplement Figure 5 rara

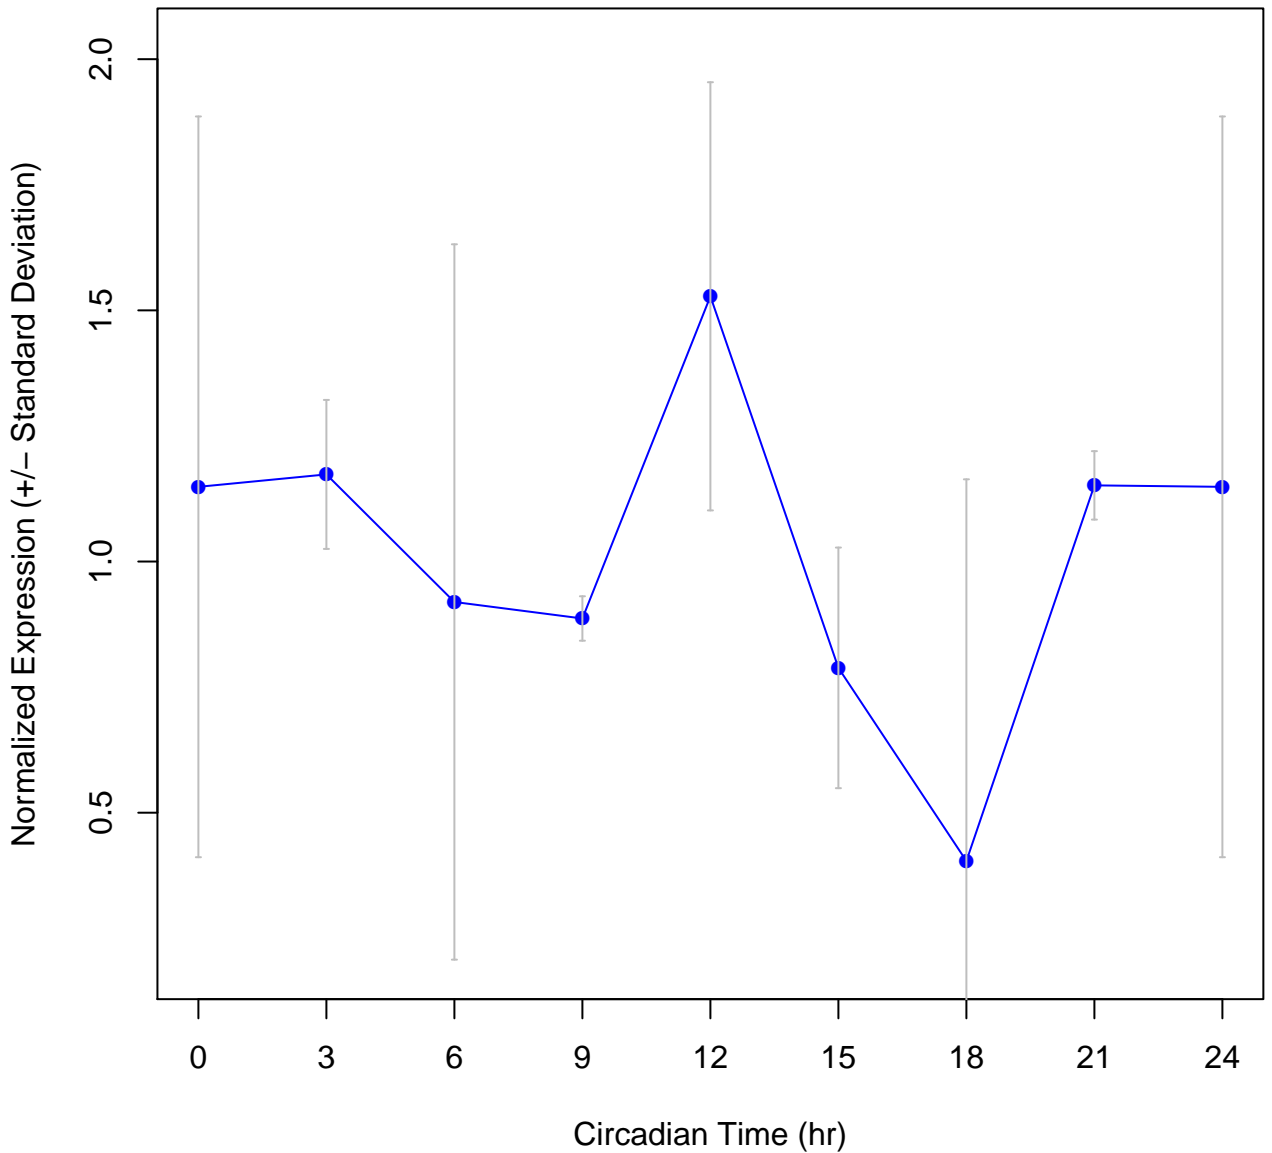

Supplement Figure 5 rarb

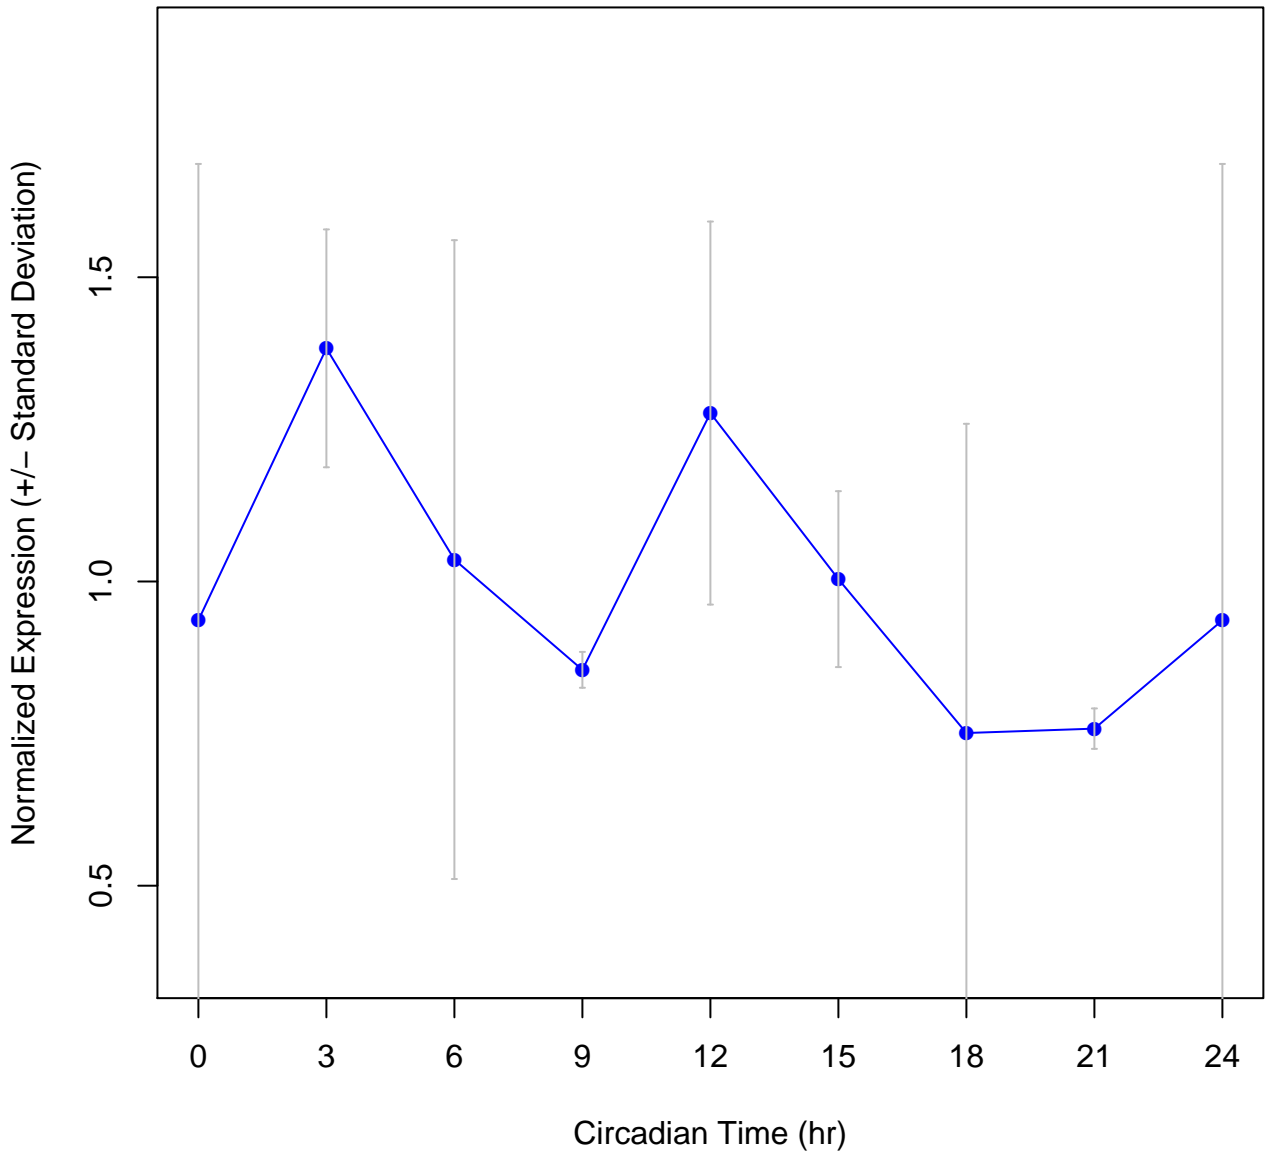

Supplement Figure 5 raver1

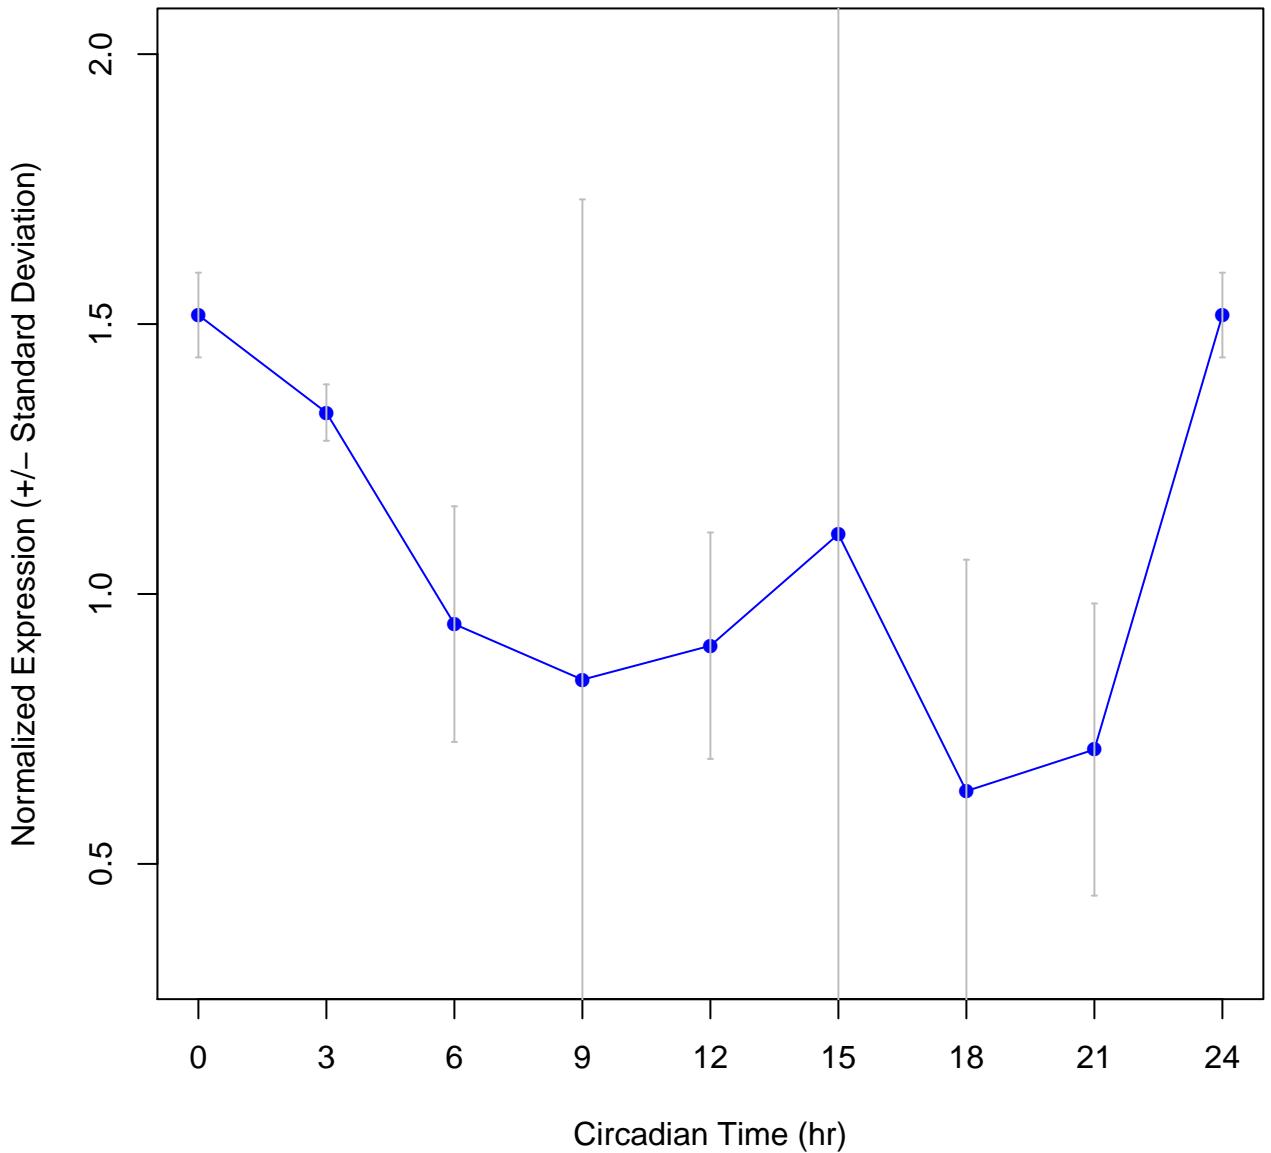

**Supplement Figure 5 rbbp5**

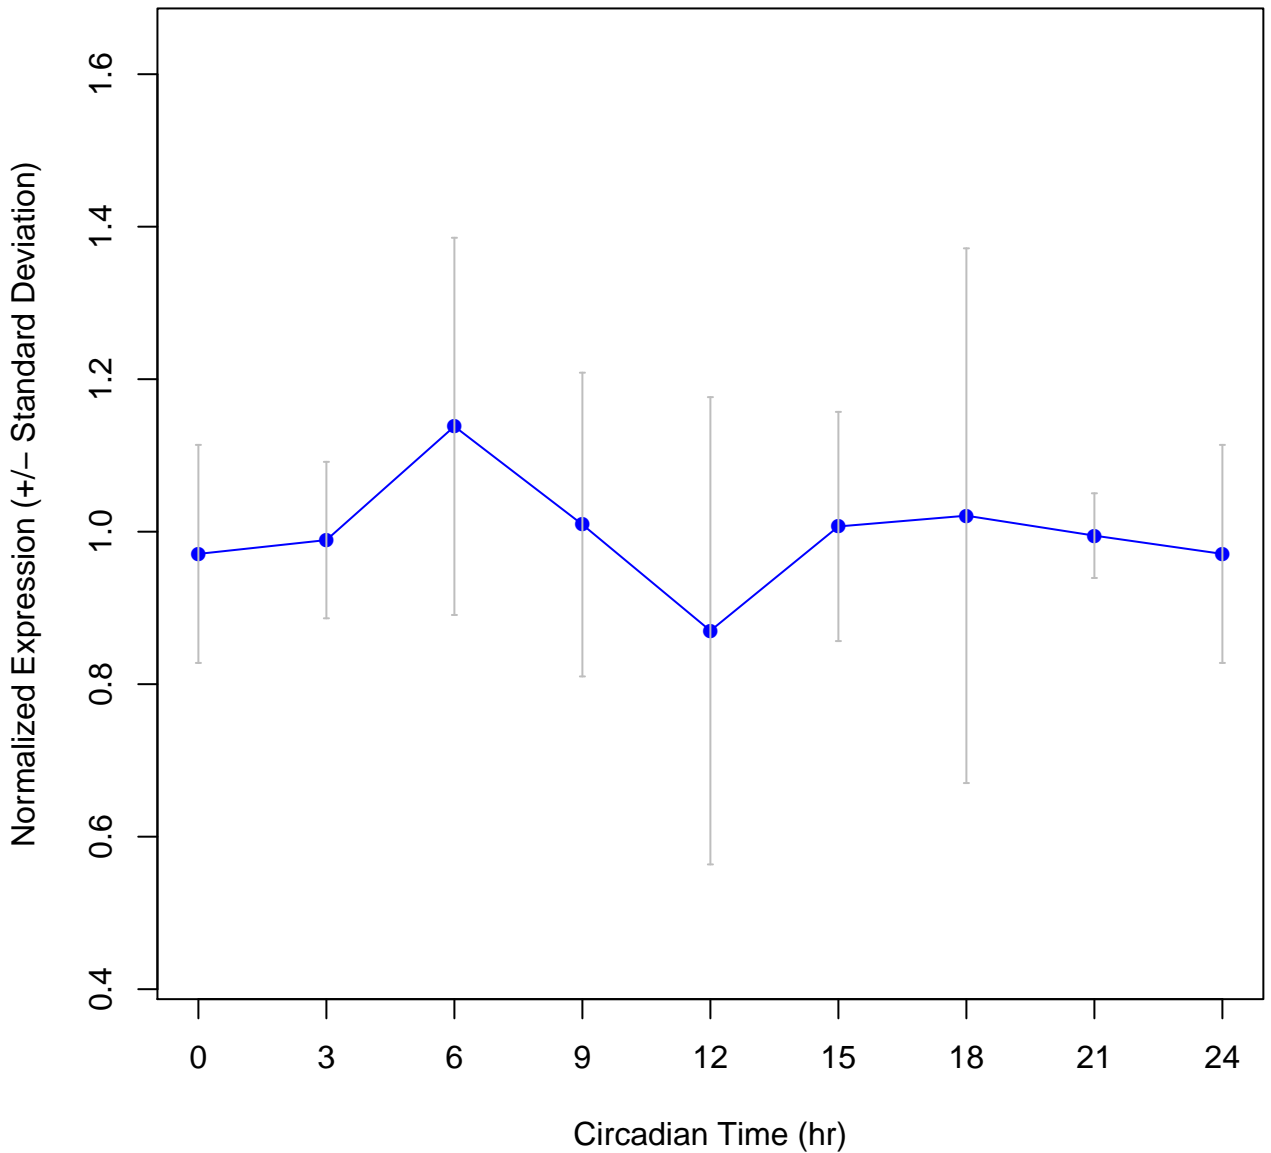

Supplement Figure 5 rora

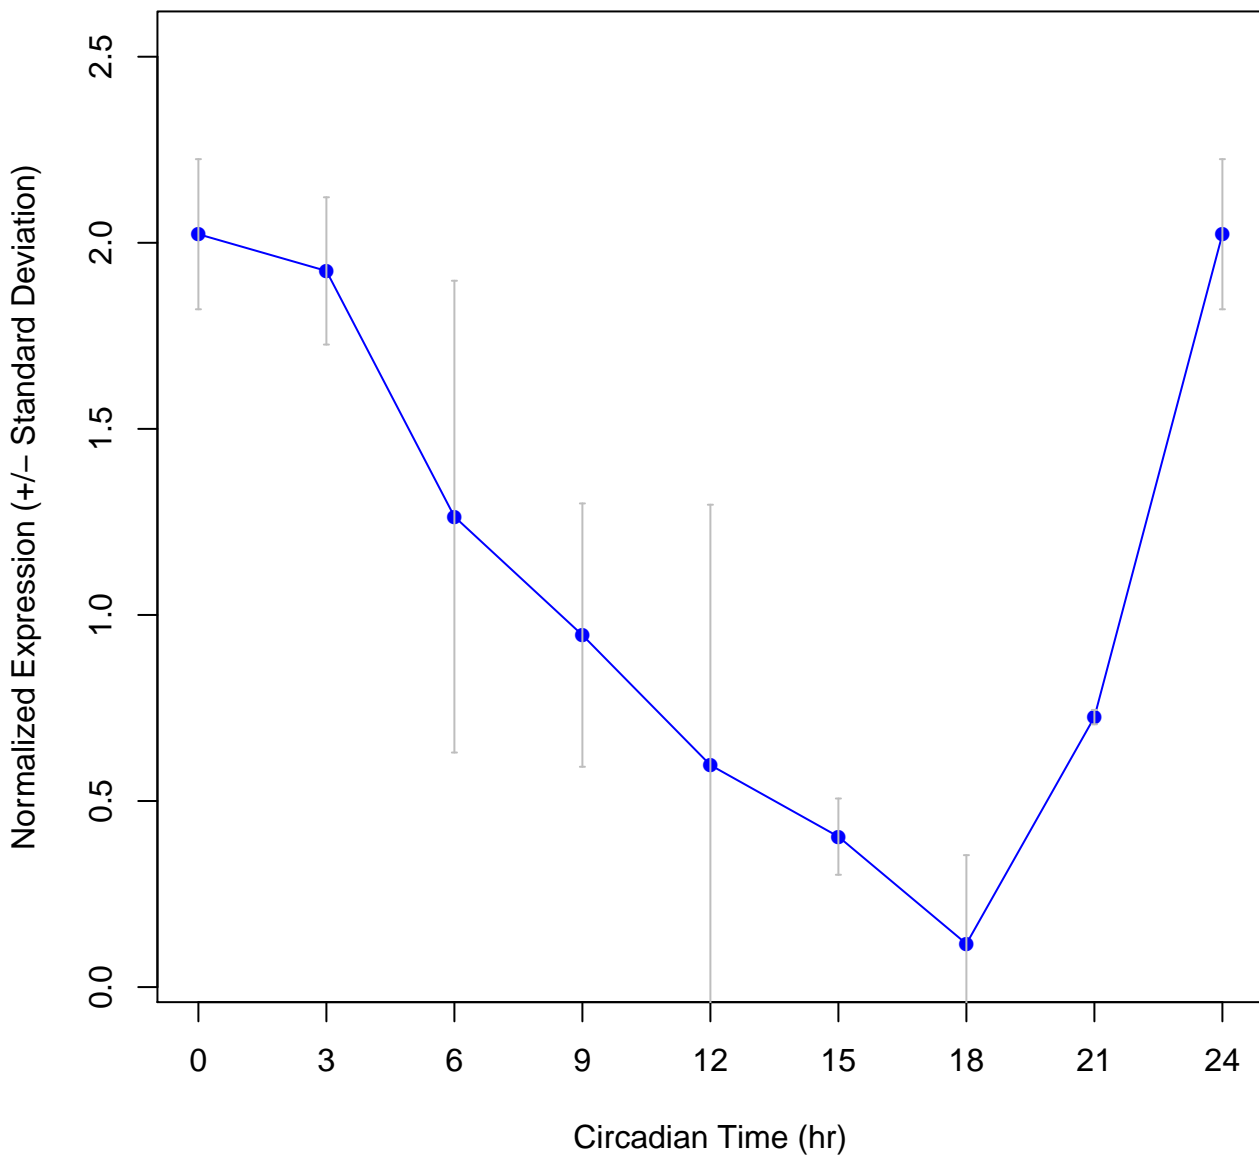

Supplement Figure 5 rps6ka2

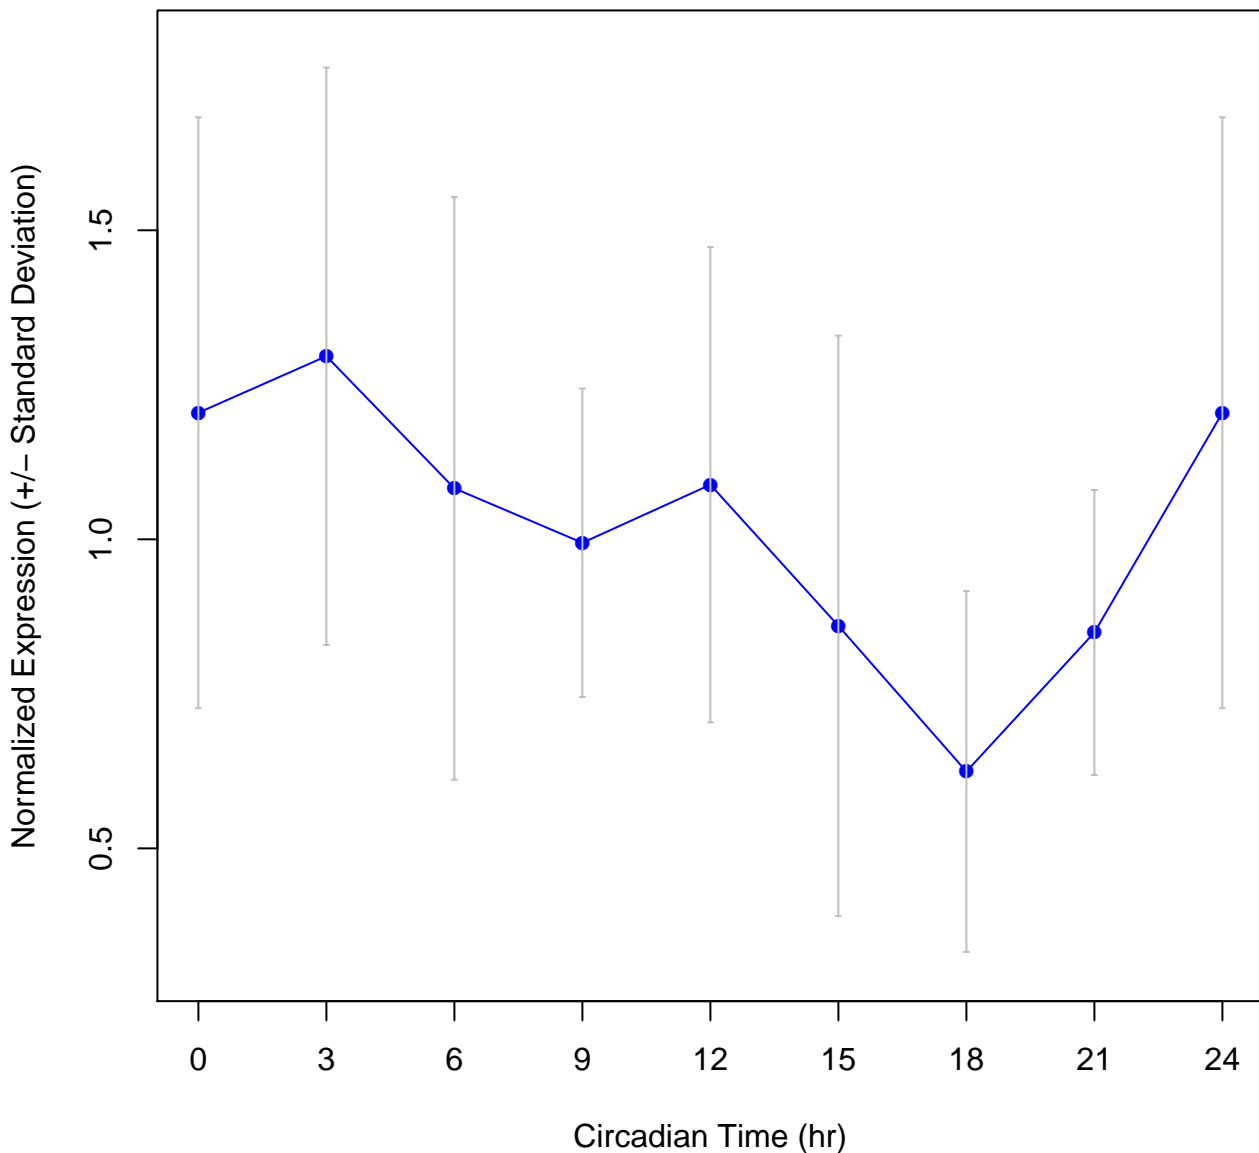

**Supplement Figure 5 rps6kb1**

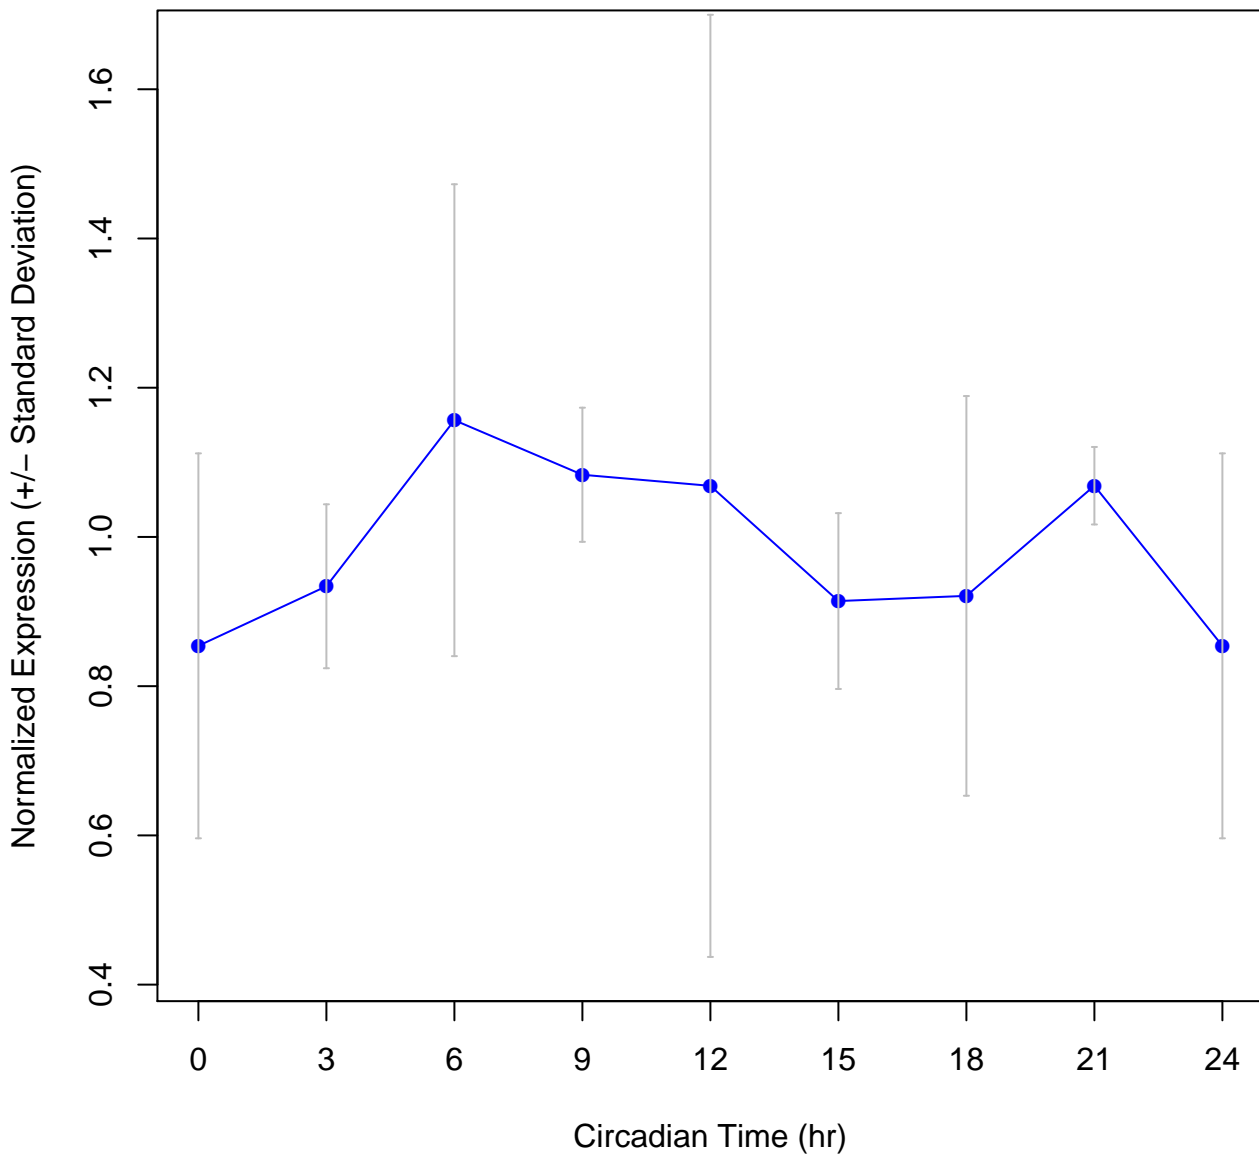

Supplement Figure 5 si\_ch211-114i13.12

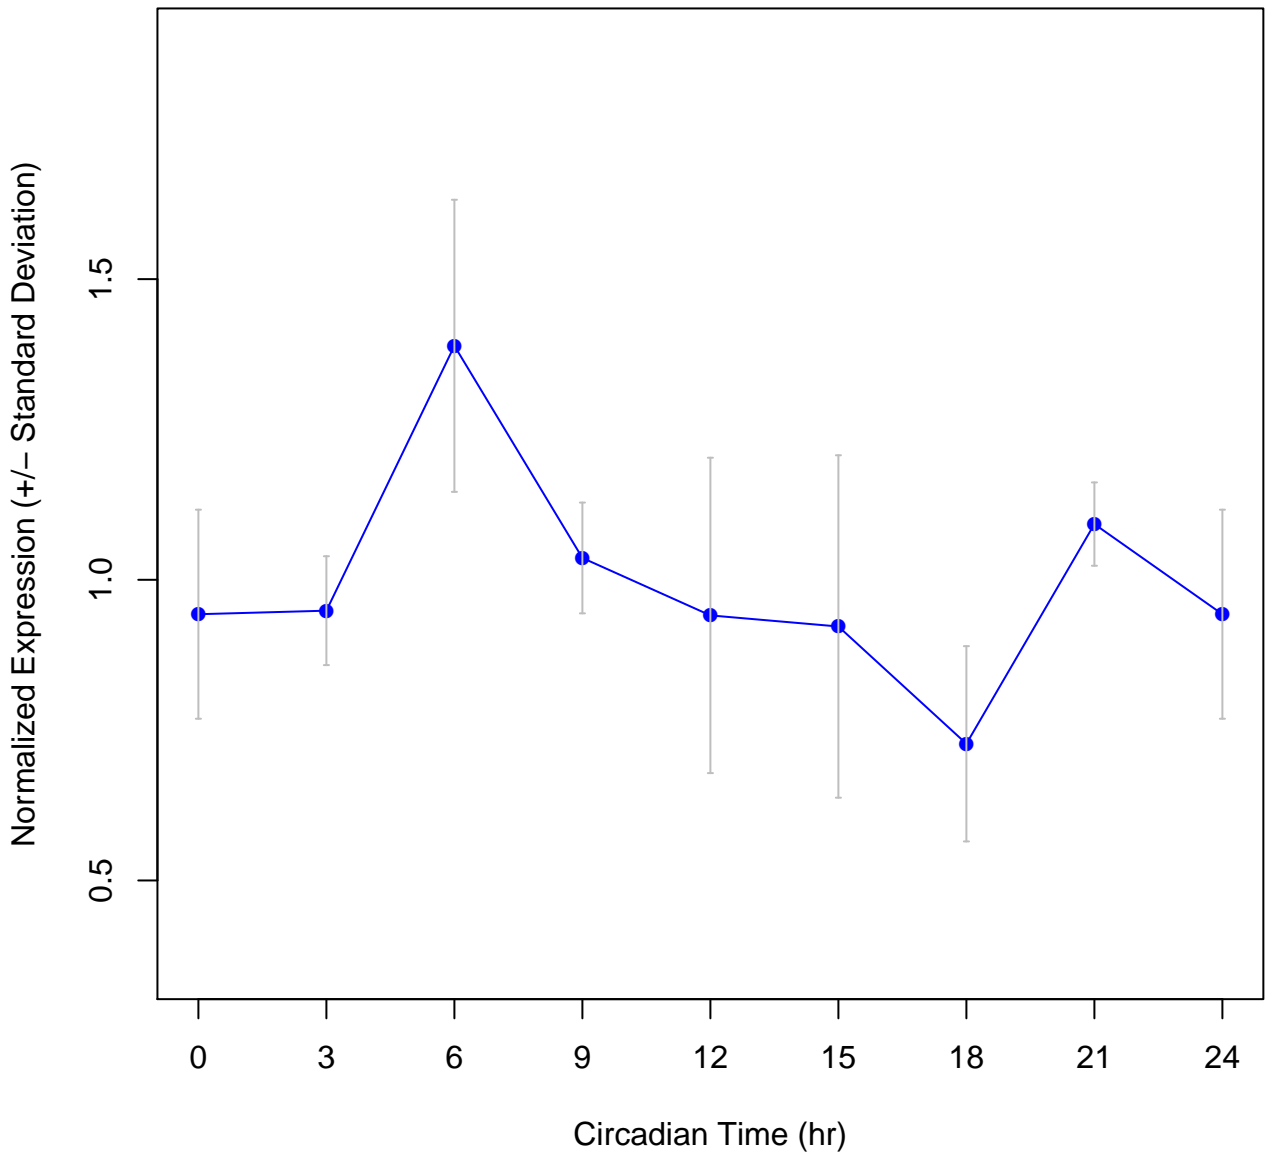



Supplement Figure 5 si\_ch211-199o1.2

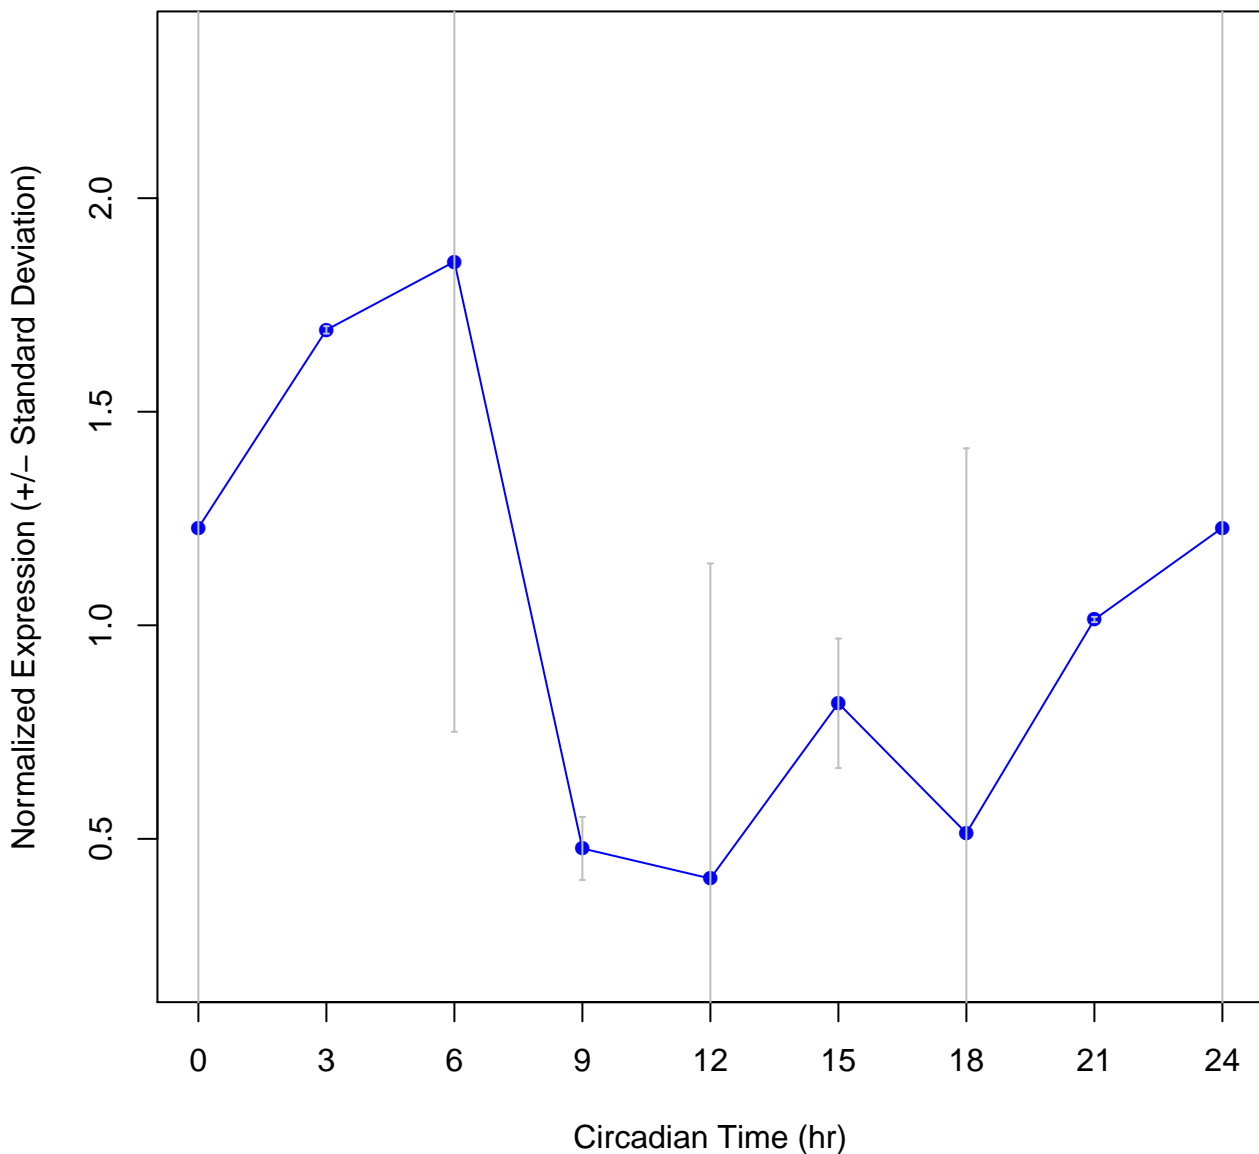

## Supplement Figure 5 sigirr

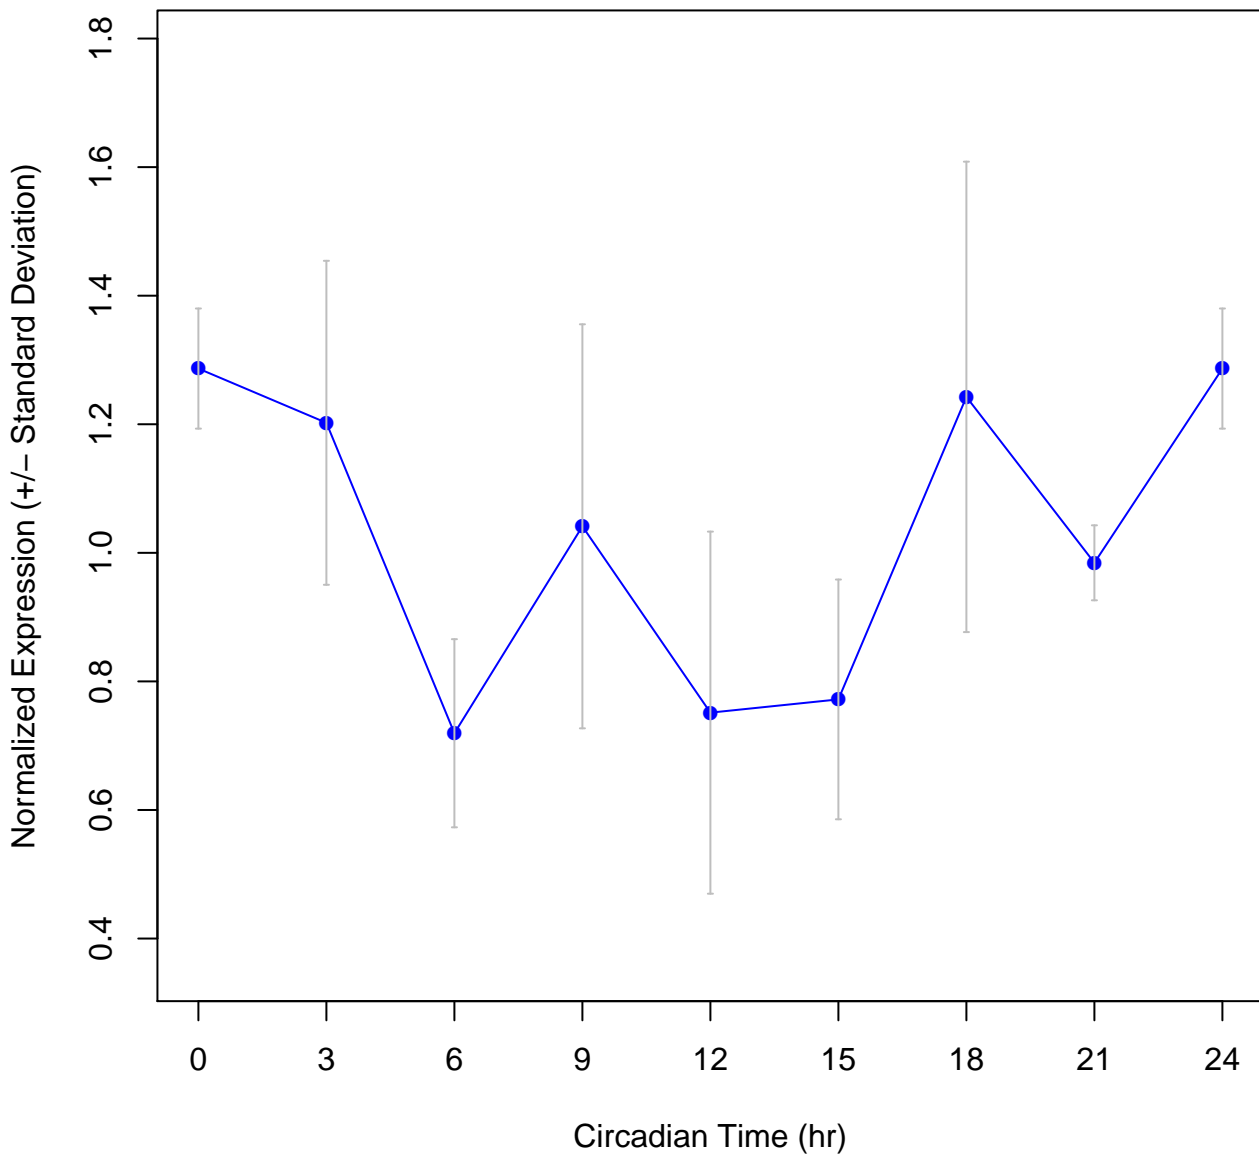

**Supplement Figure 5 sirt1**

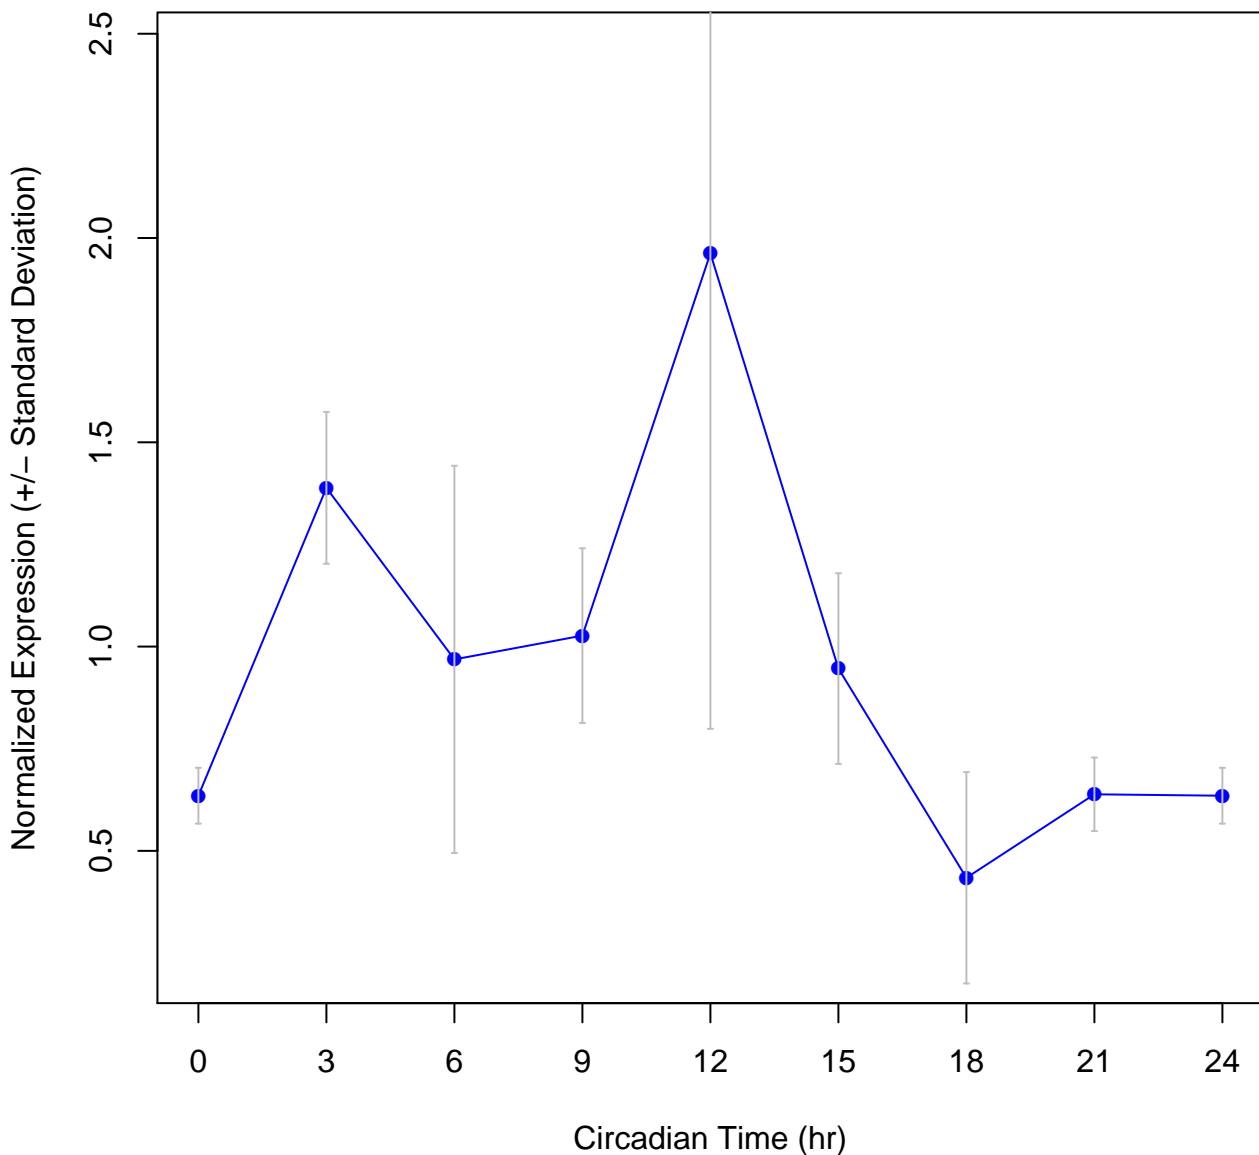

**Supplement Figure 5 six3**

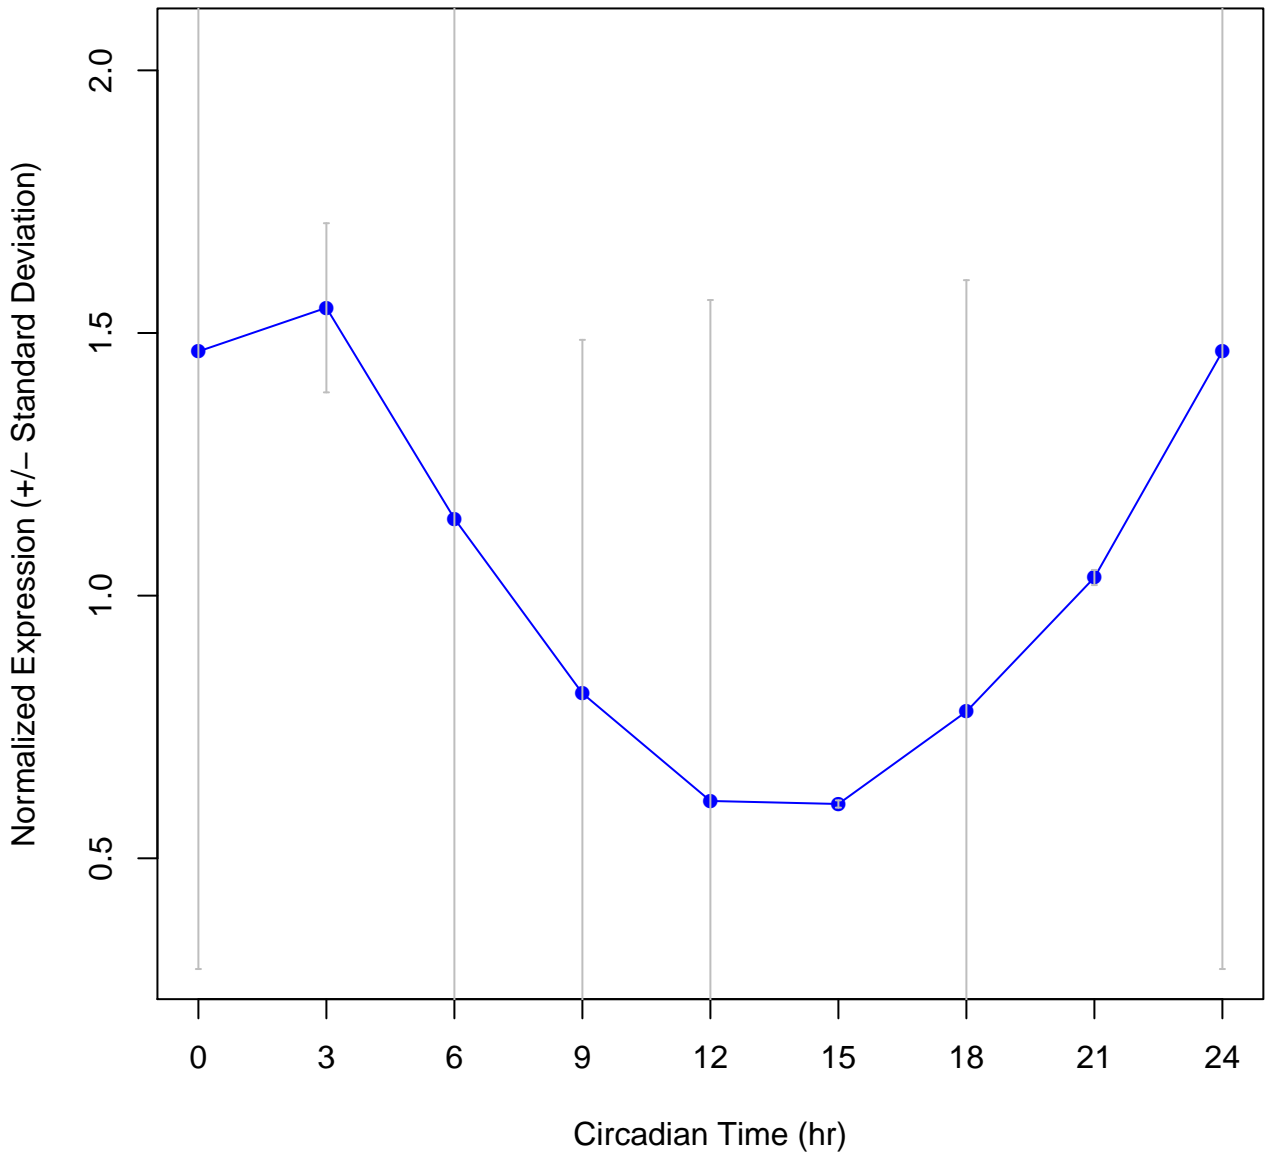

**Supplement Figure 5 skp1**

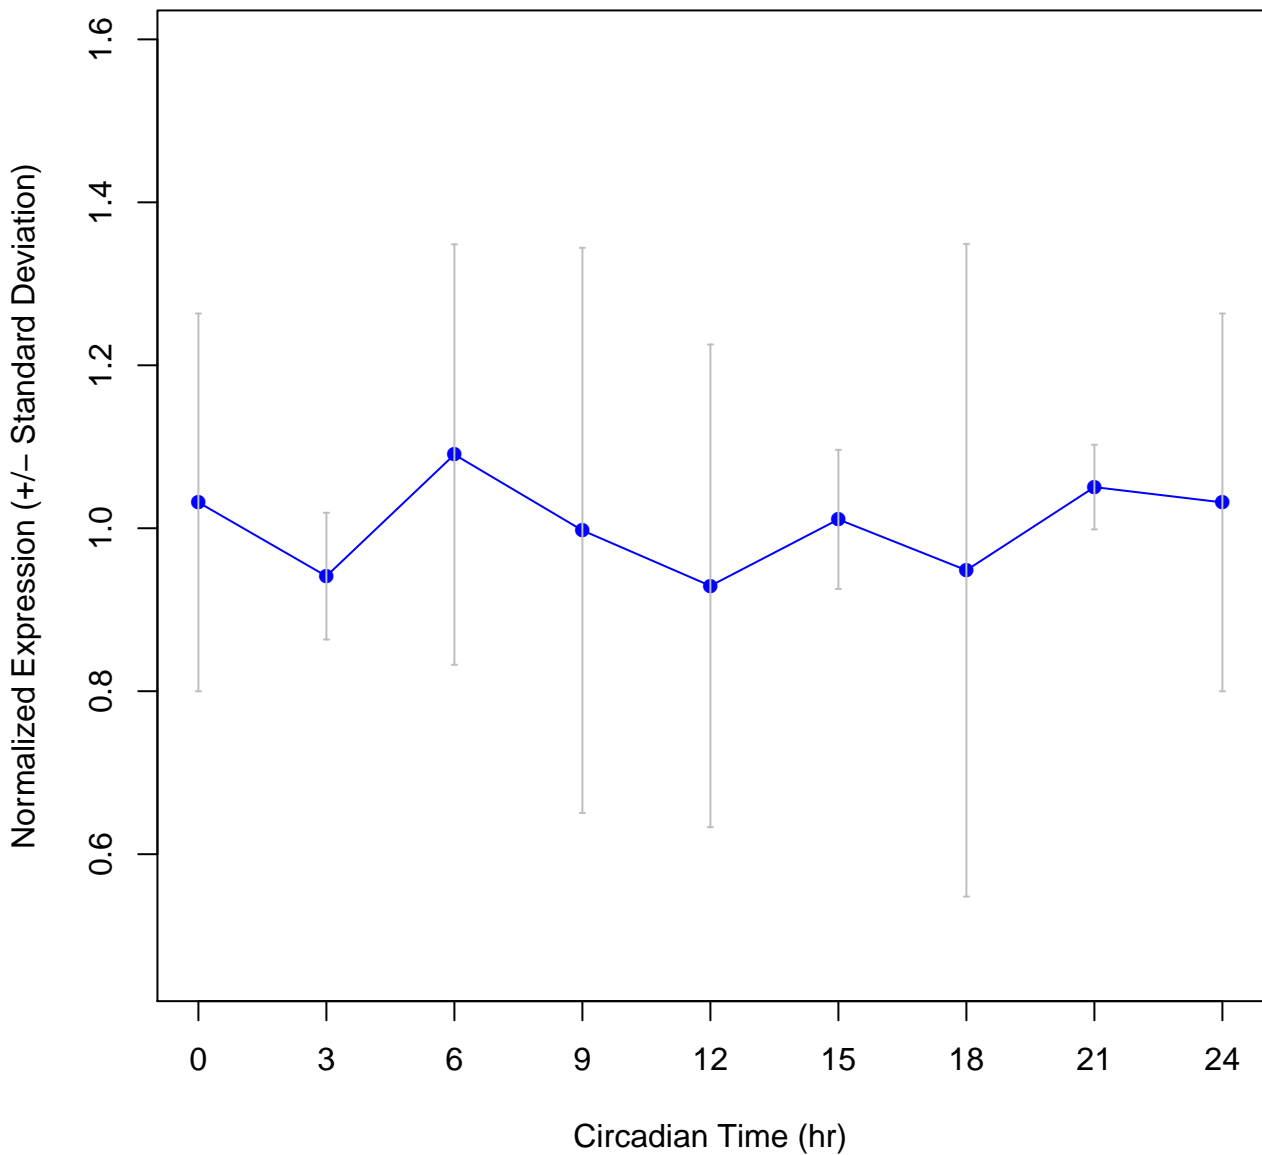

# Supplement Figure 5 slc2a4

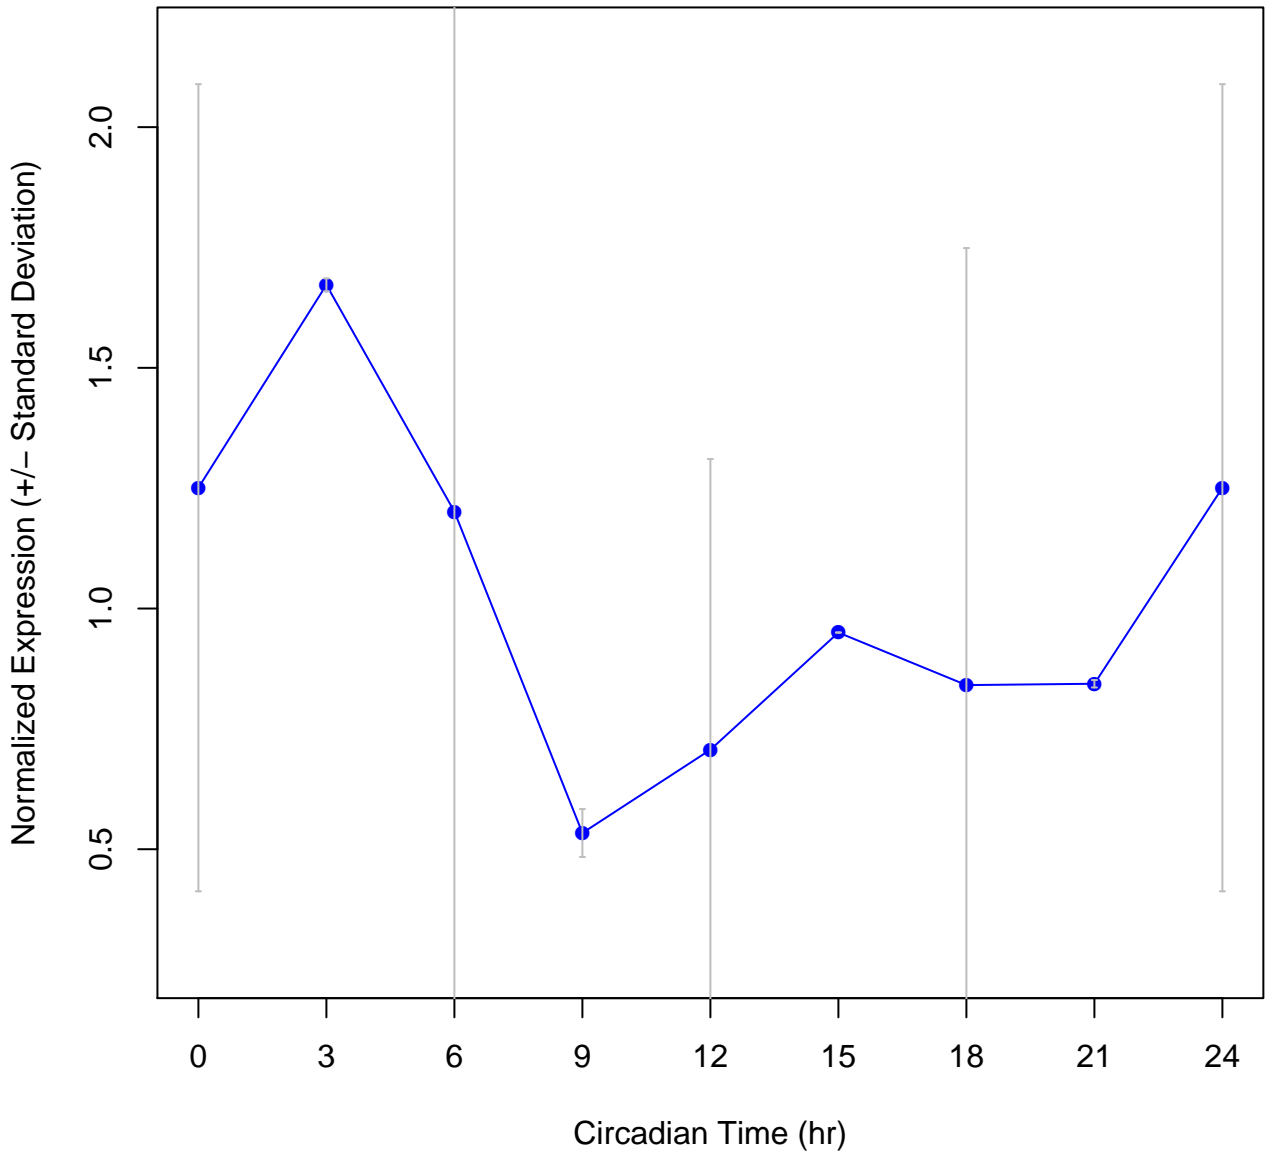

**Supplement Figure 5 slc2a4rg**

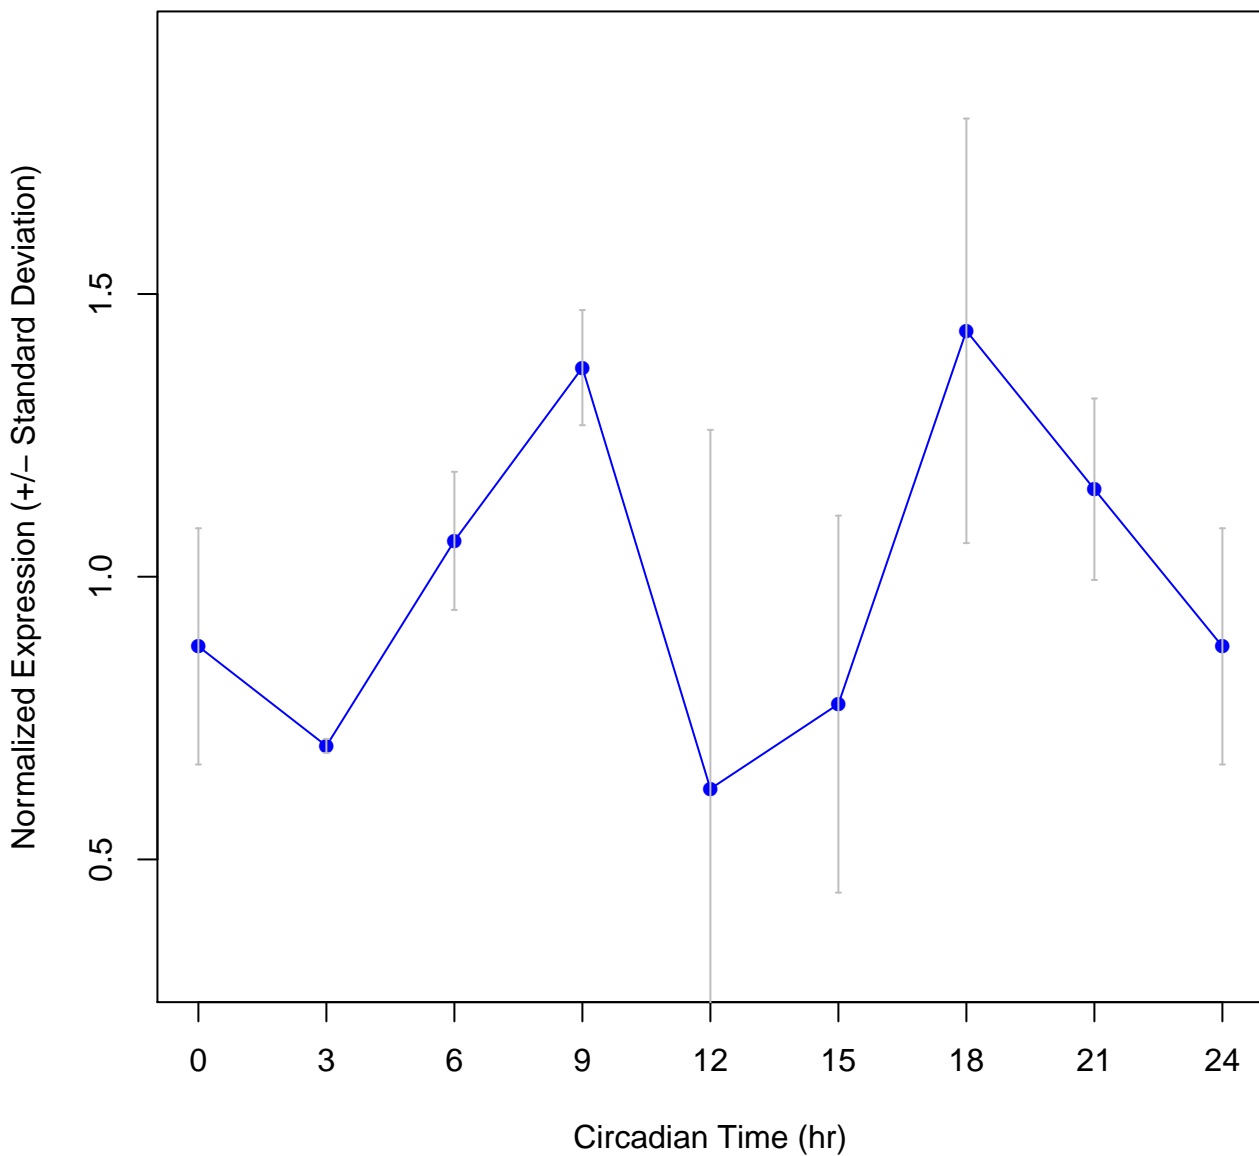

Supplement Figure 5 snca

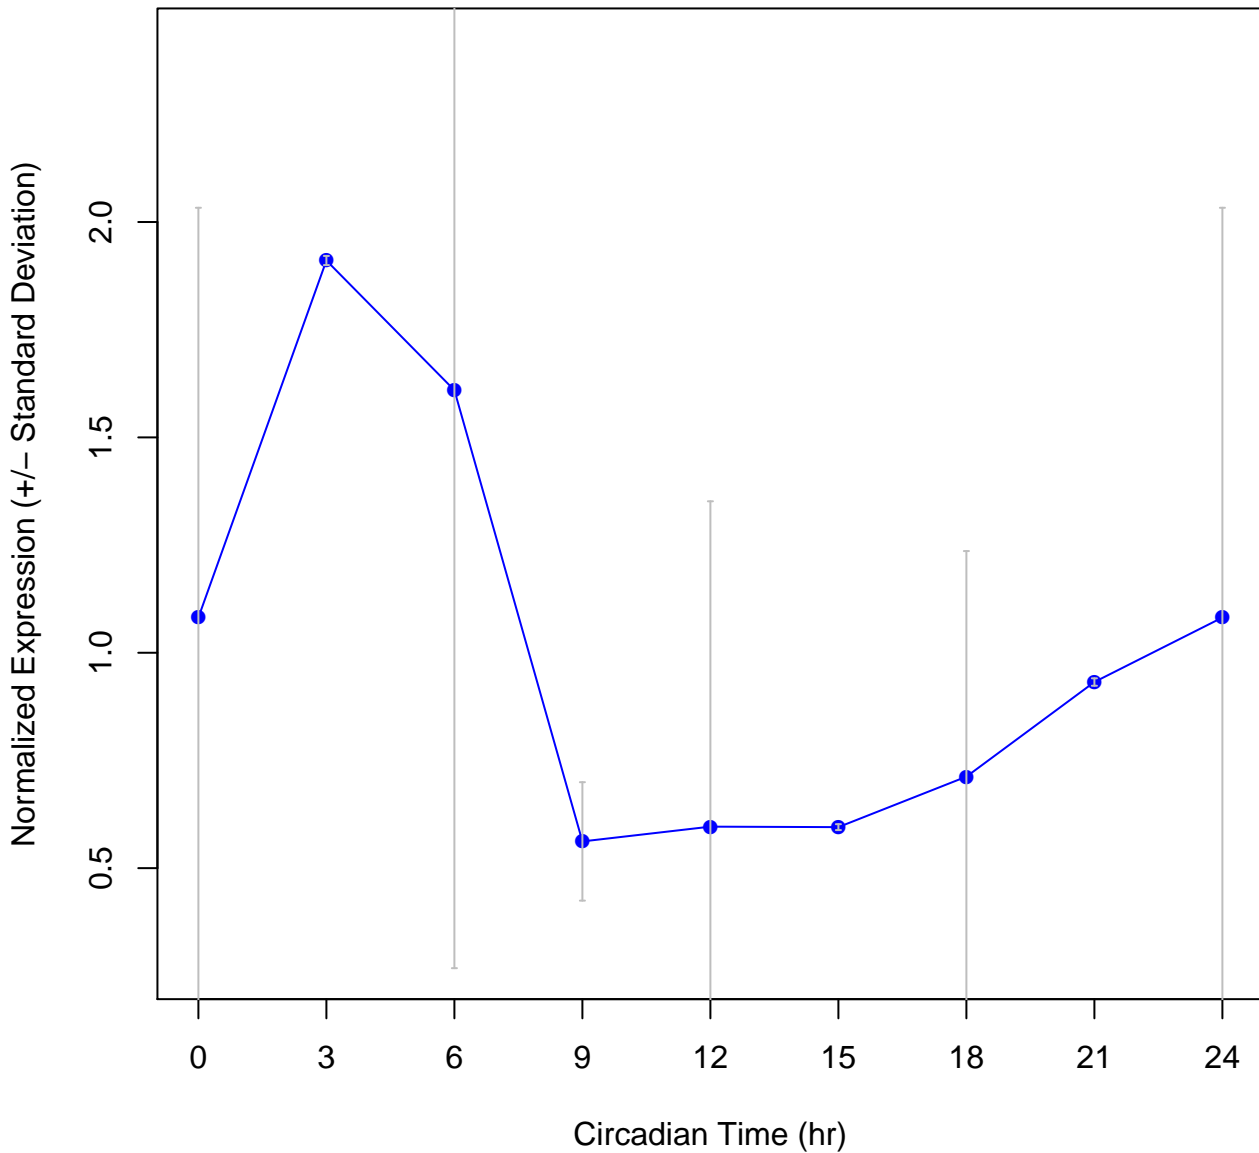



# Supplement Figure 5 sort1

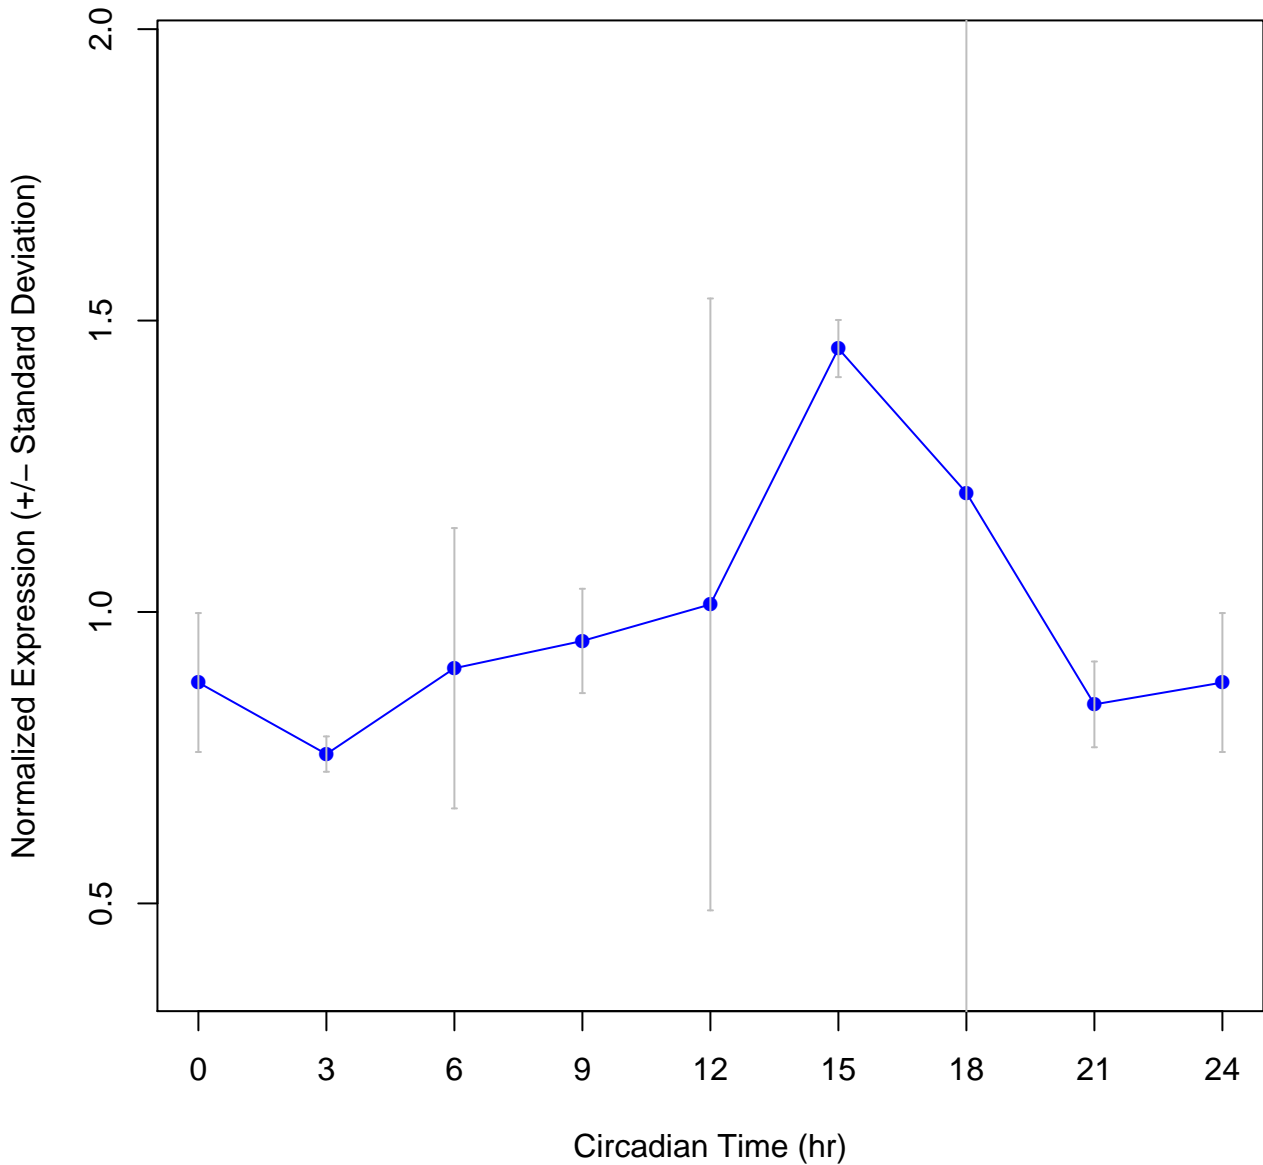

**Supplement Figure 5 sox10**

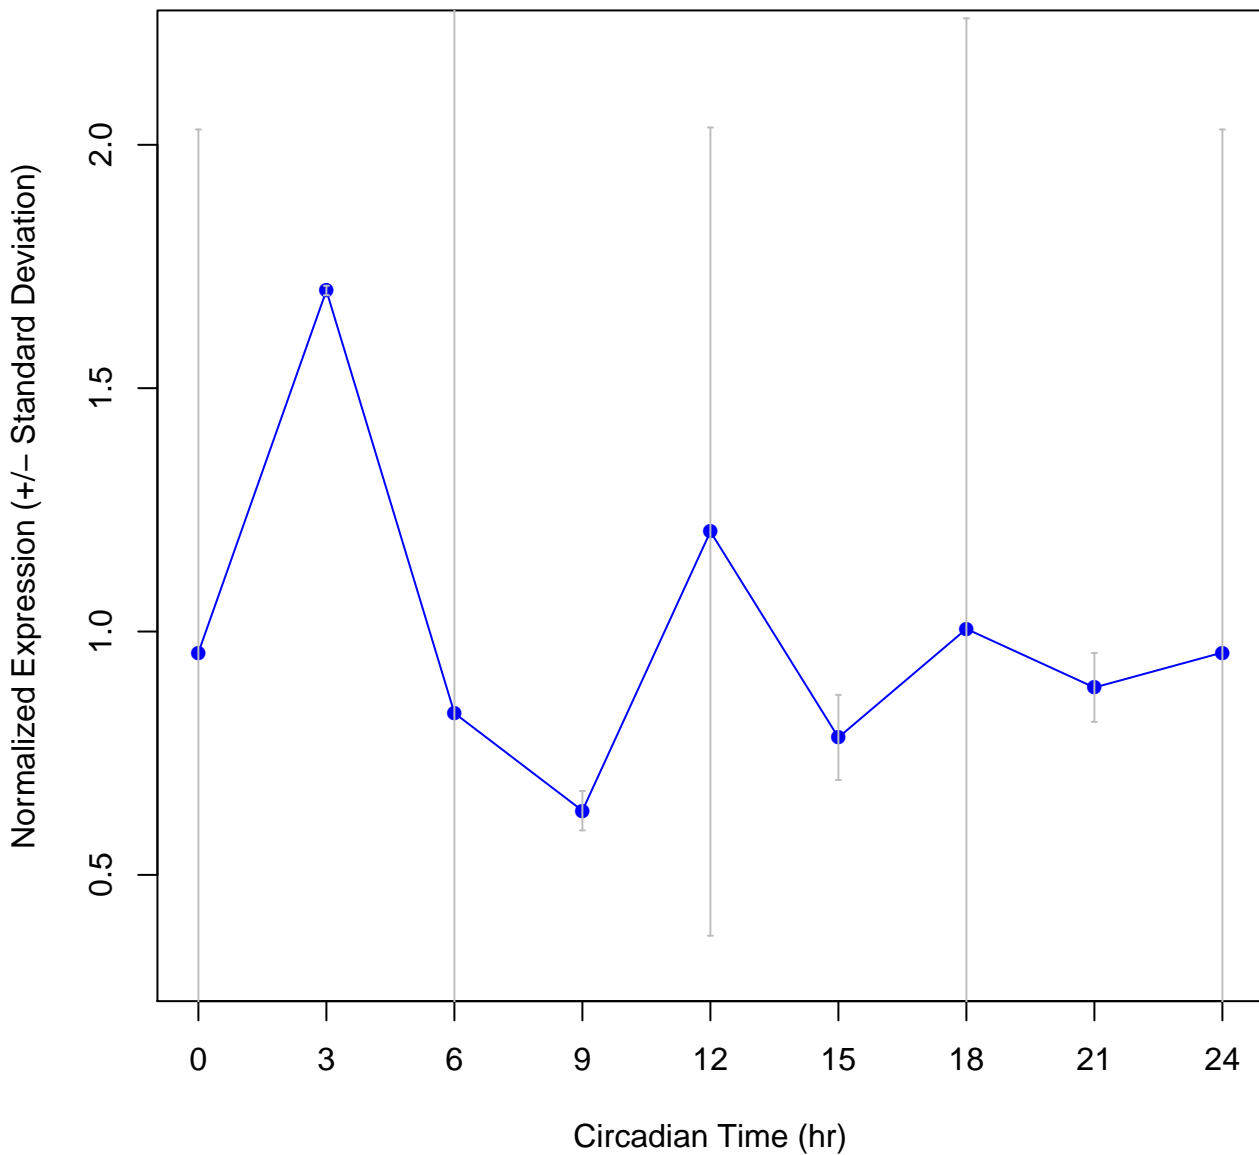

**Supplement Figure 5 sox8**

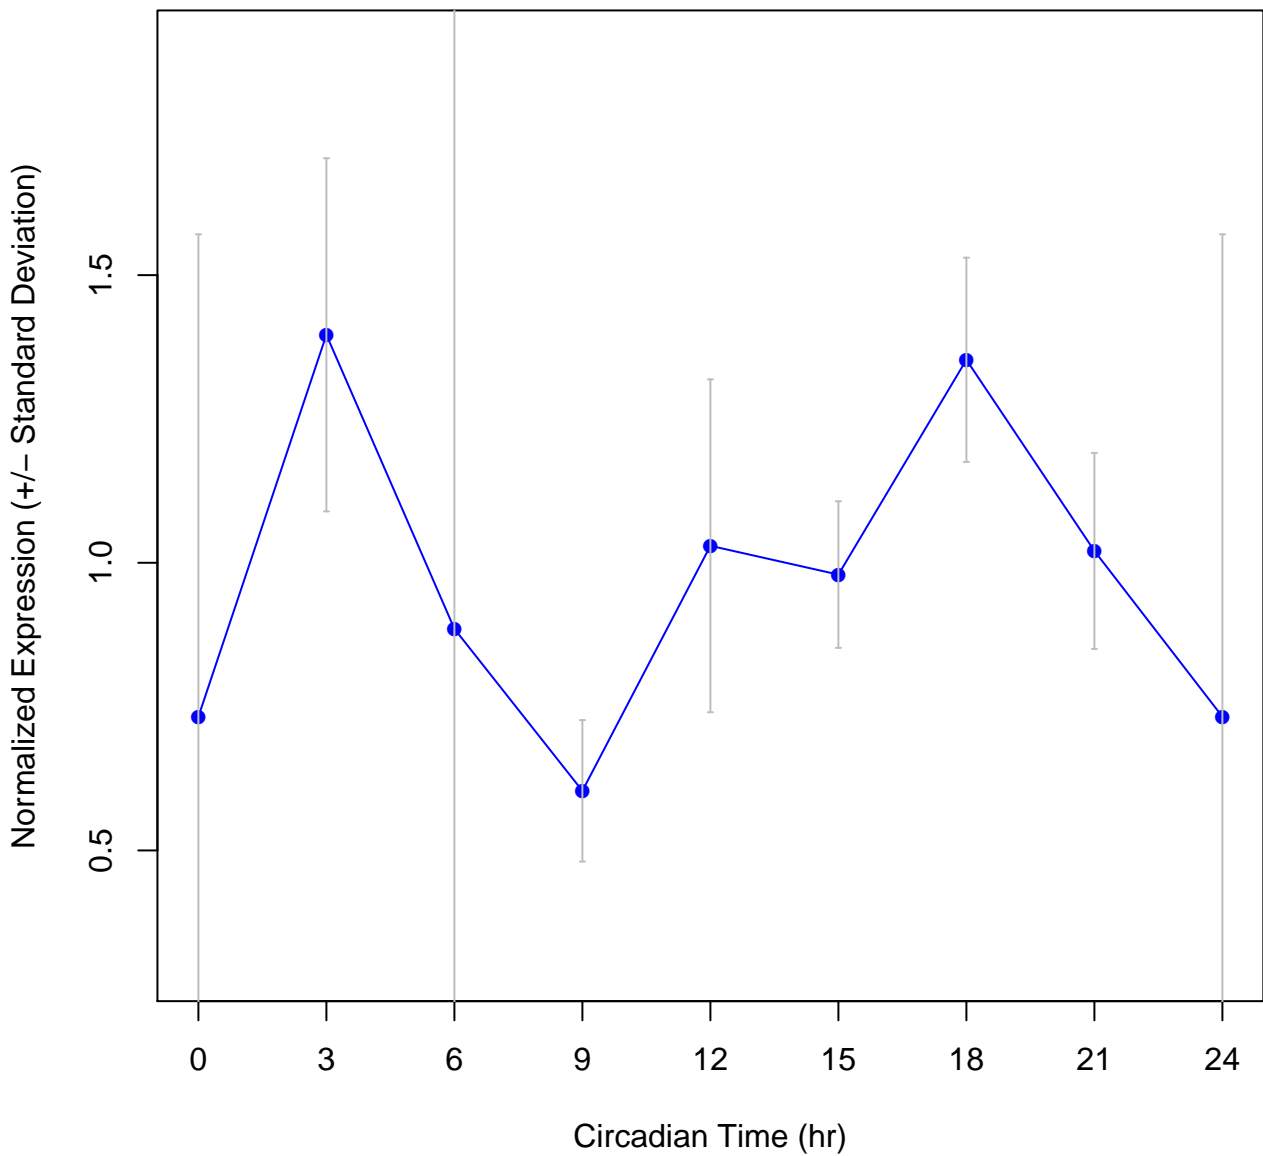

Supplement Figure 5 spc25

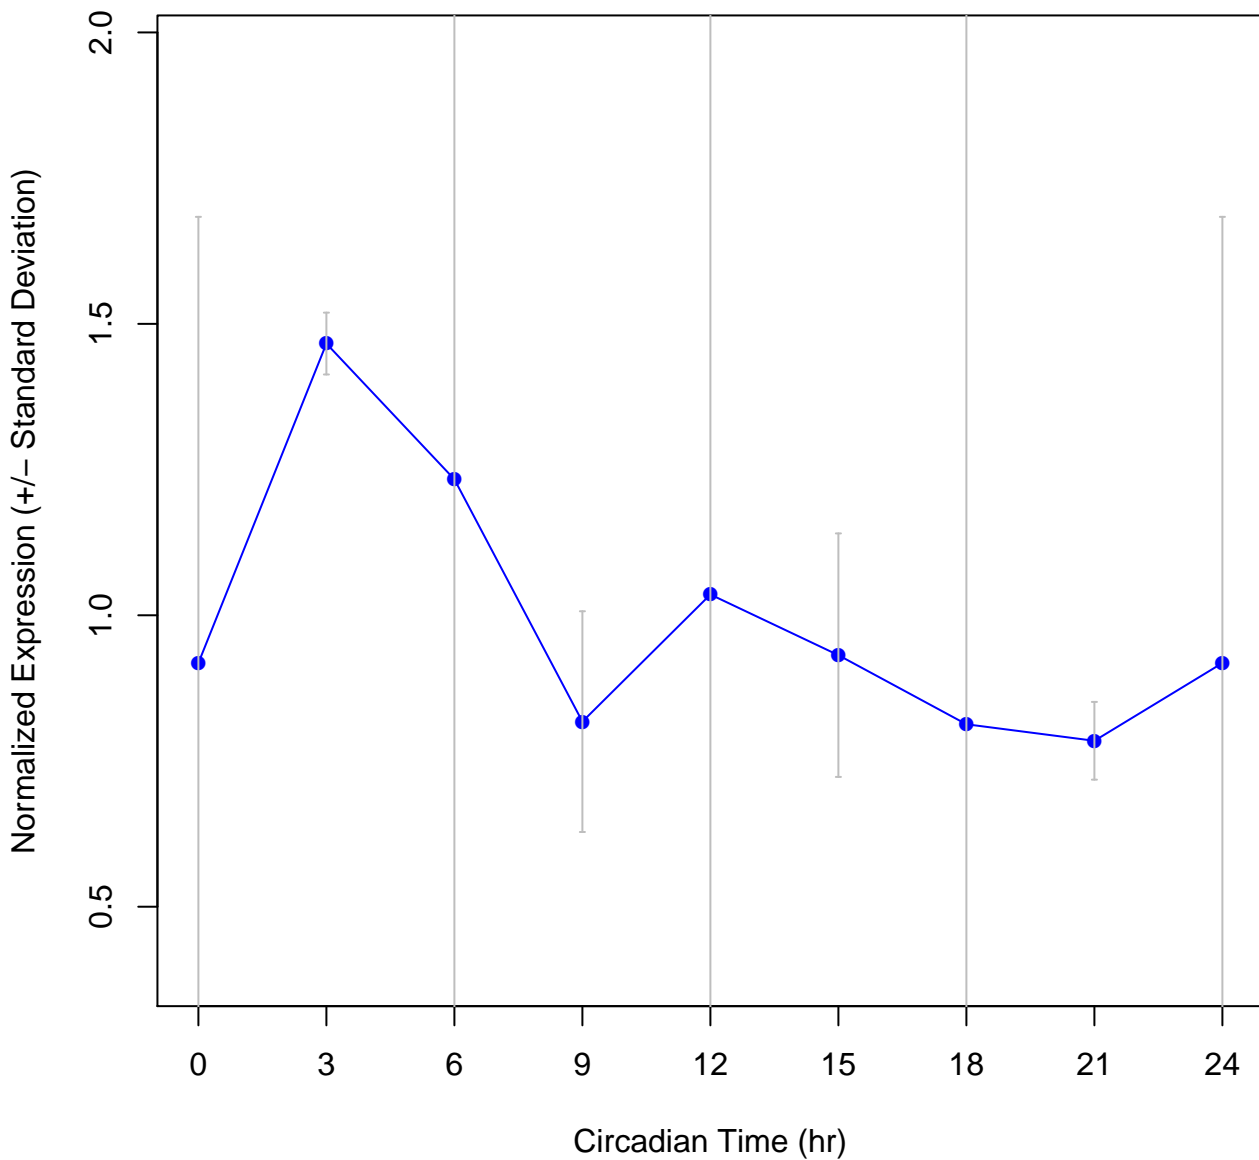

**Supplement Figure 5 srebf1**

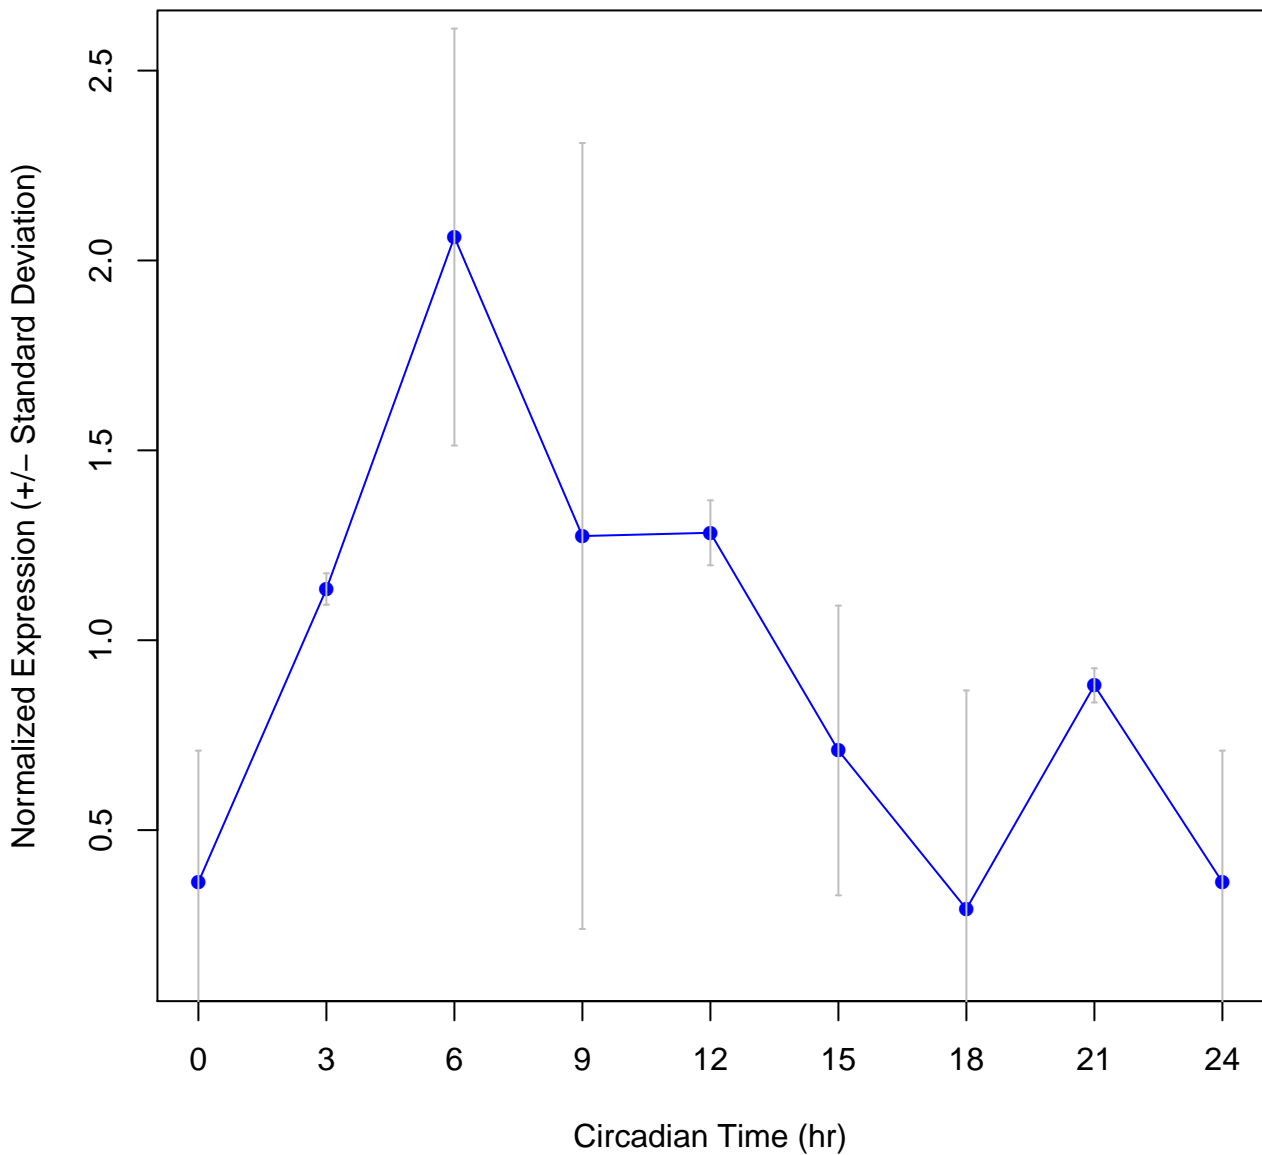

Supplement Figure 5 sybu

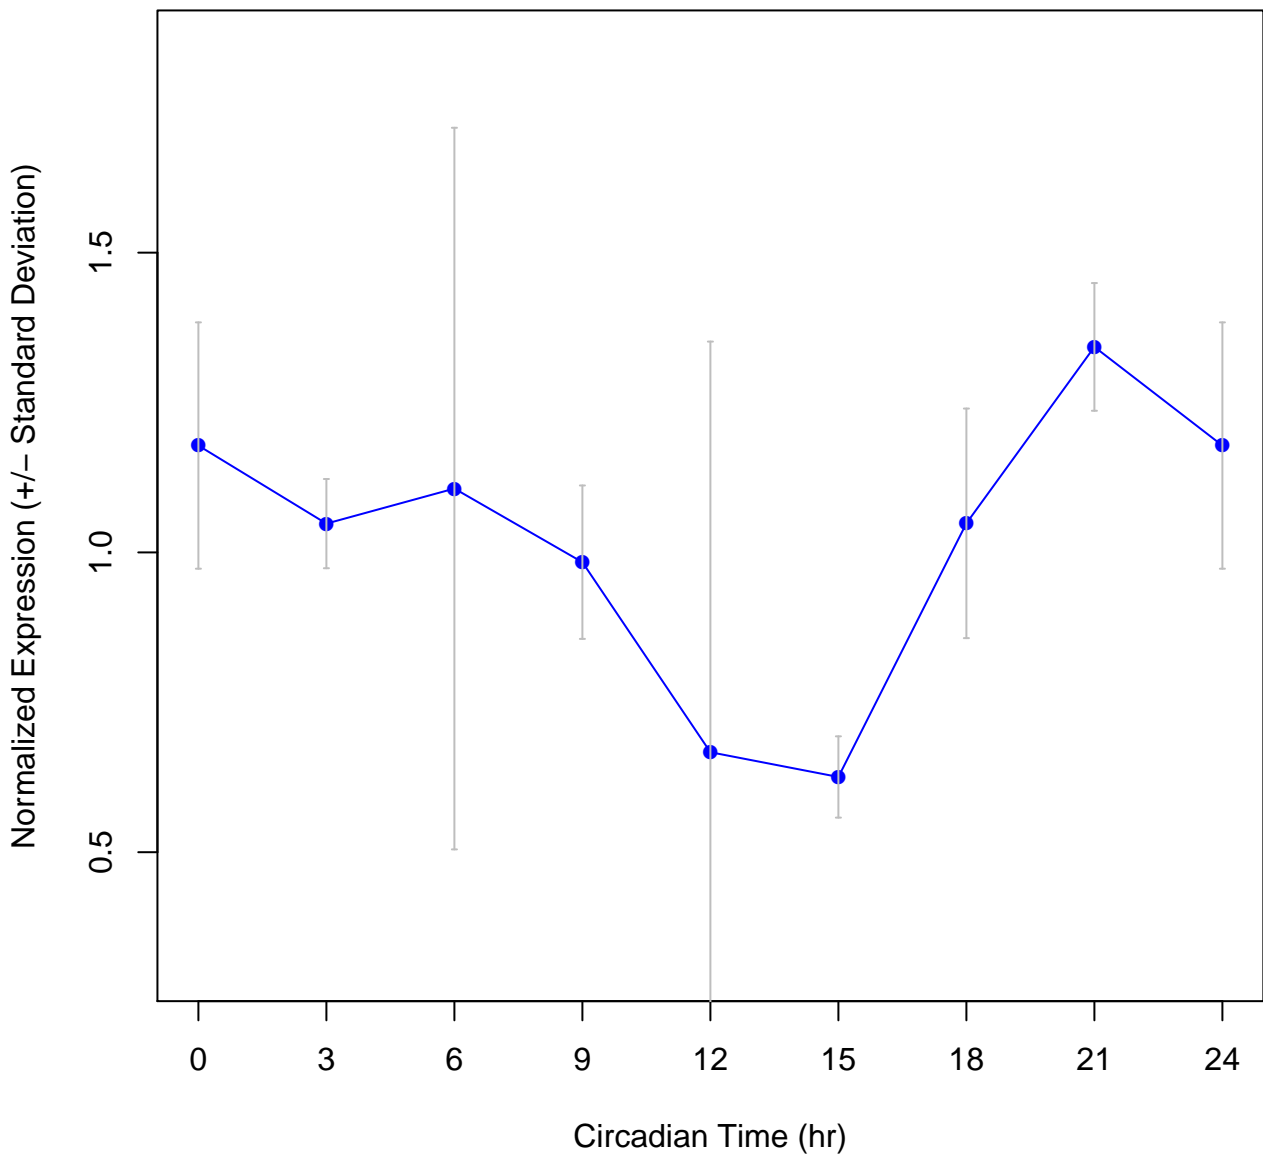

Supplement Figure 5 tgm8

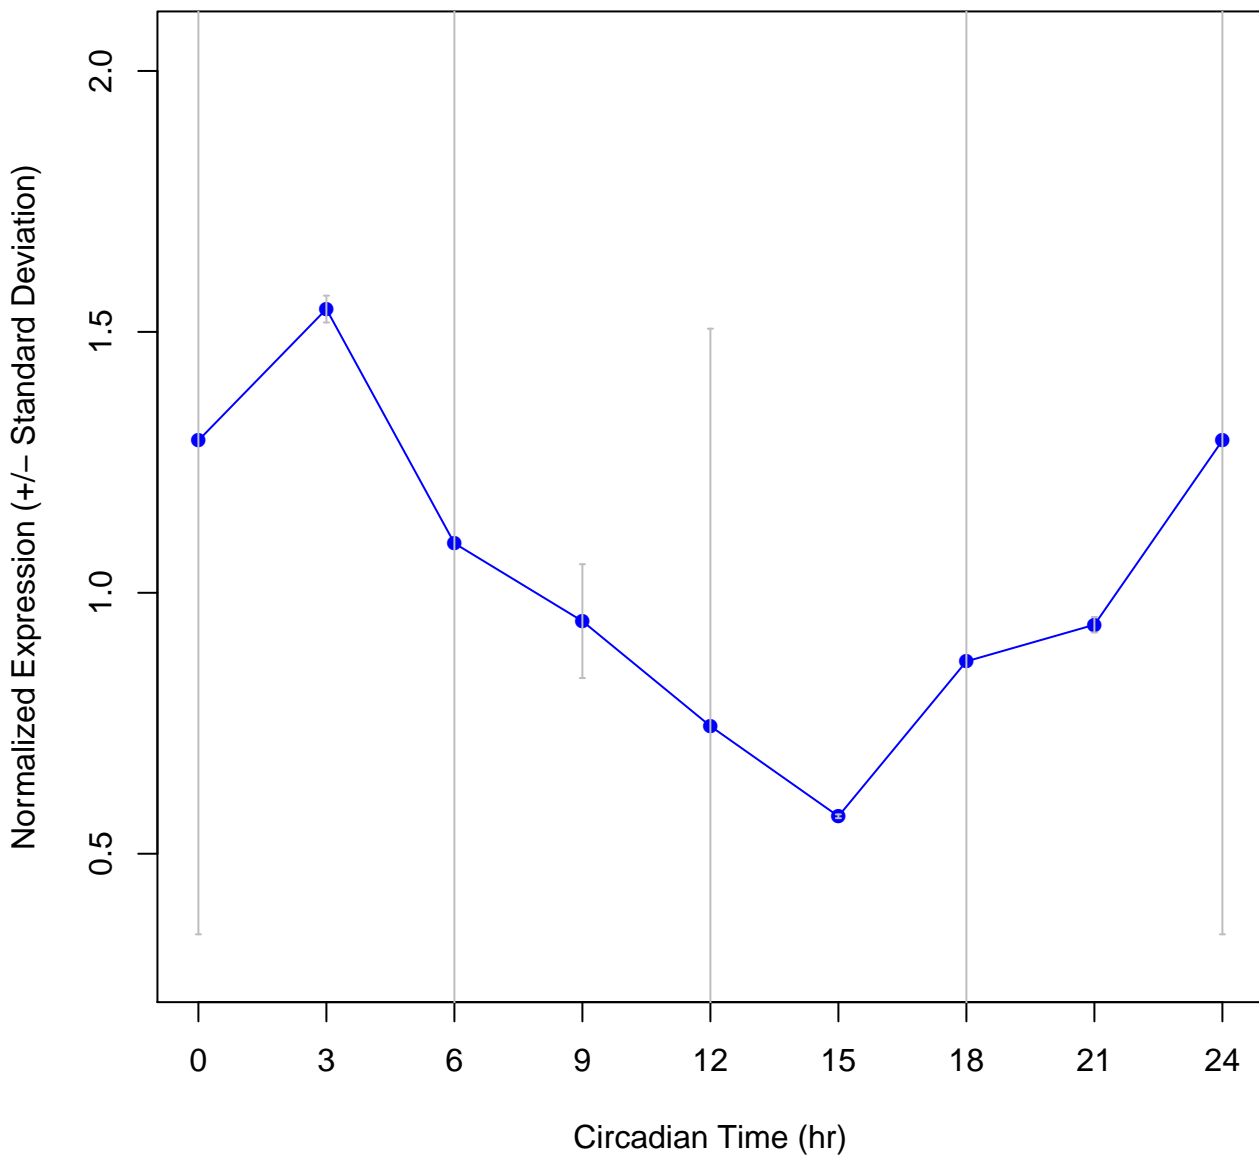

Supplement Figure 5 thbs1

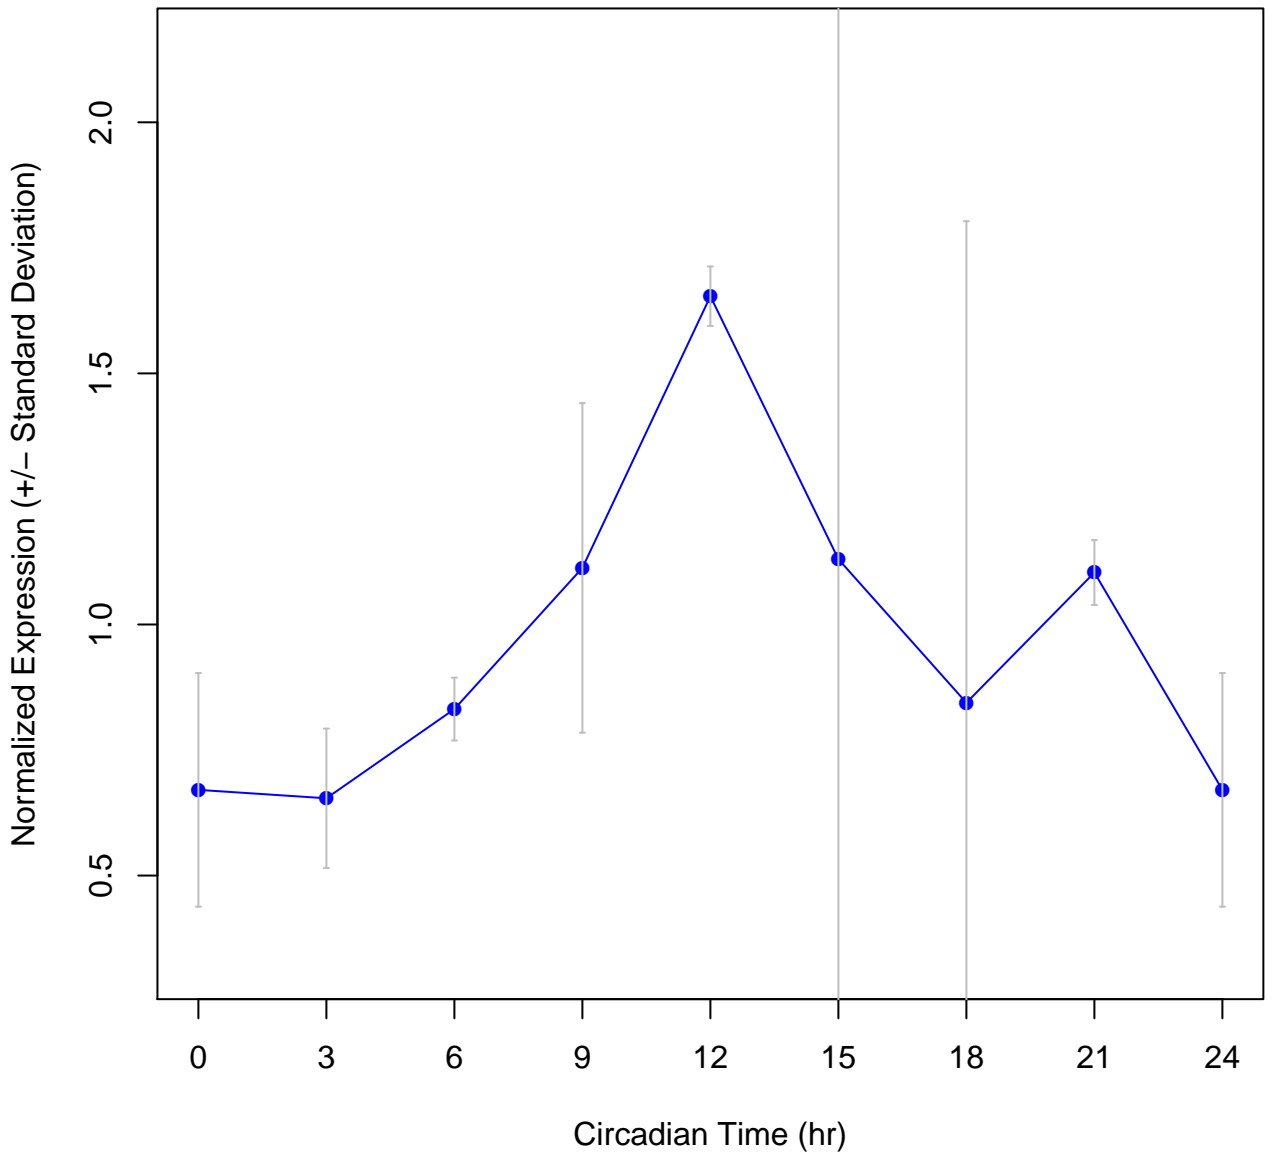



Supplement Figure 5 tim1

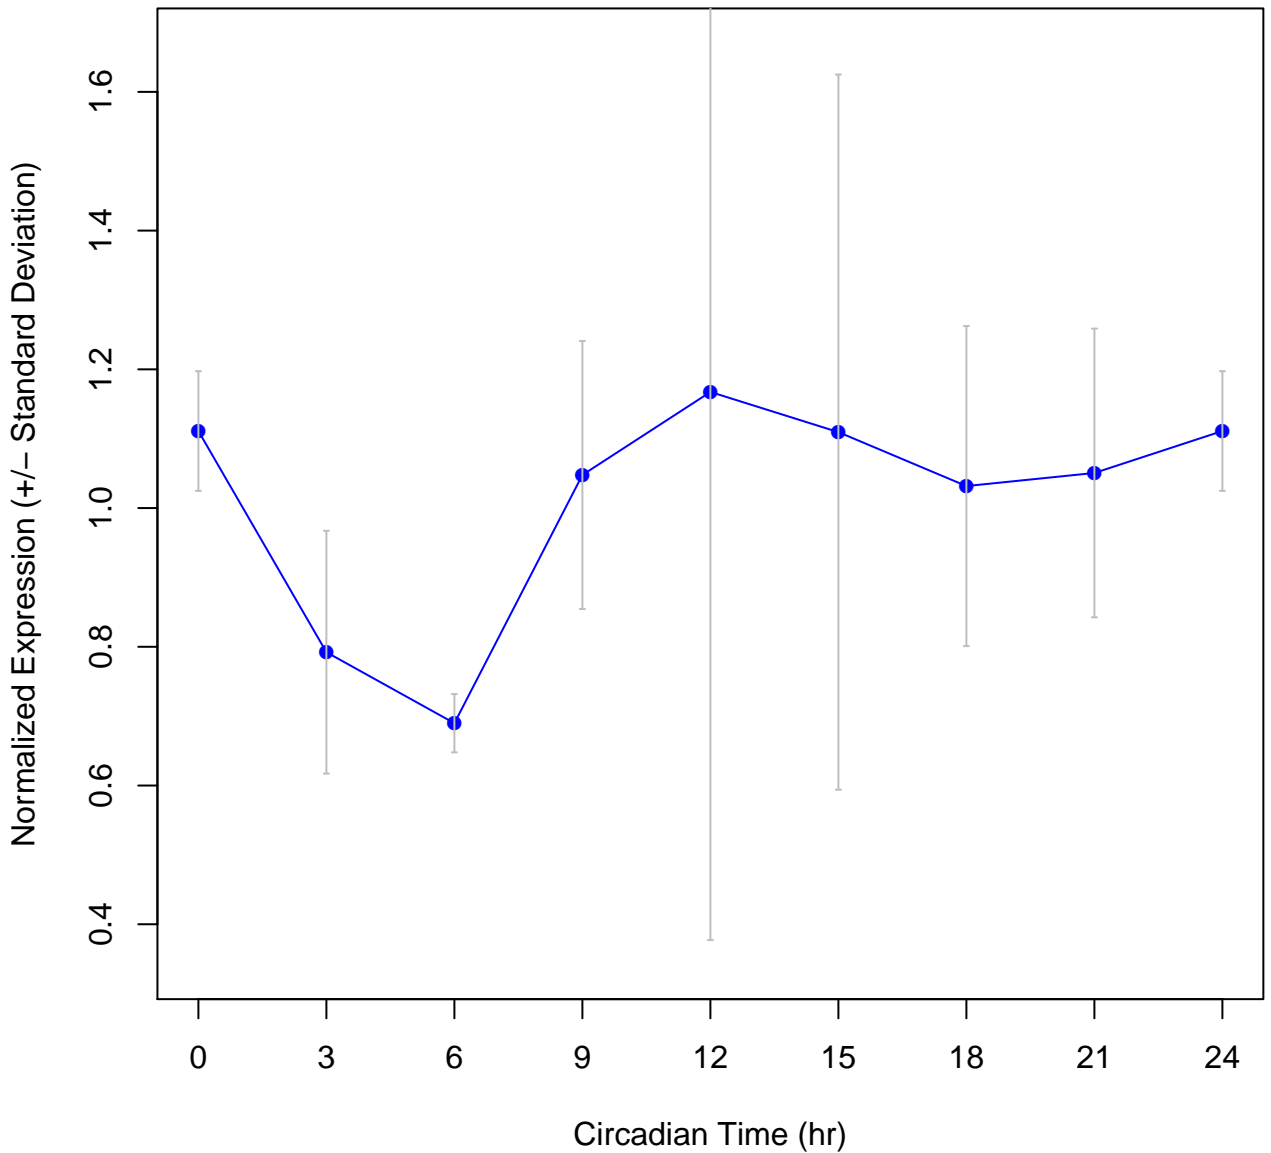

Supplement Figure 5 tmem204

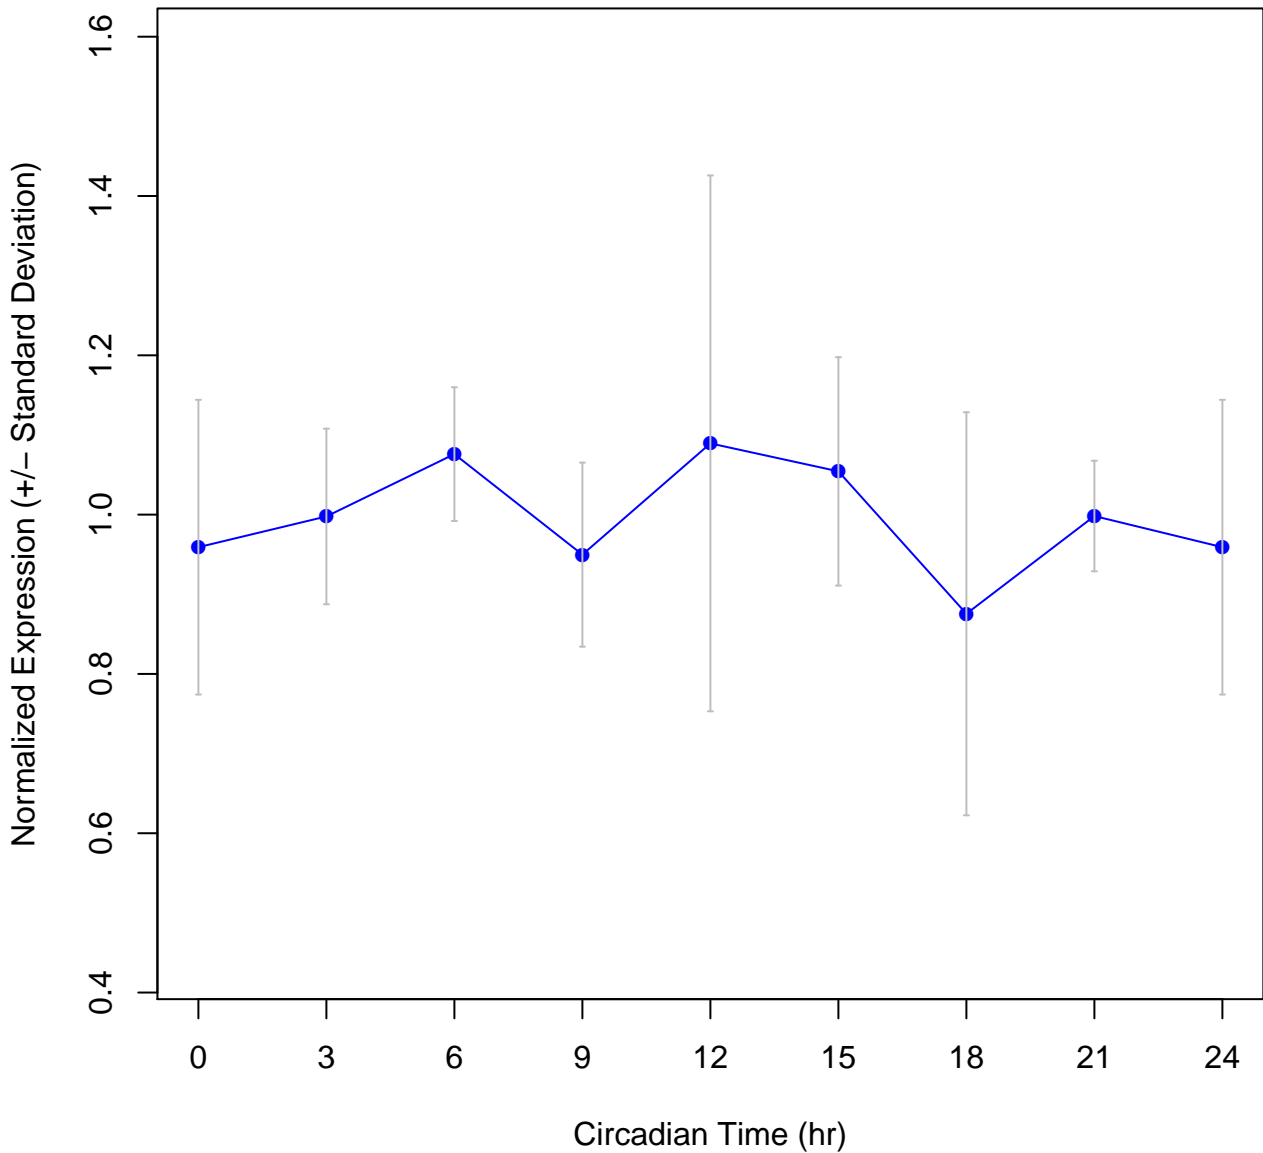

Supplement Figure 5 top2a

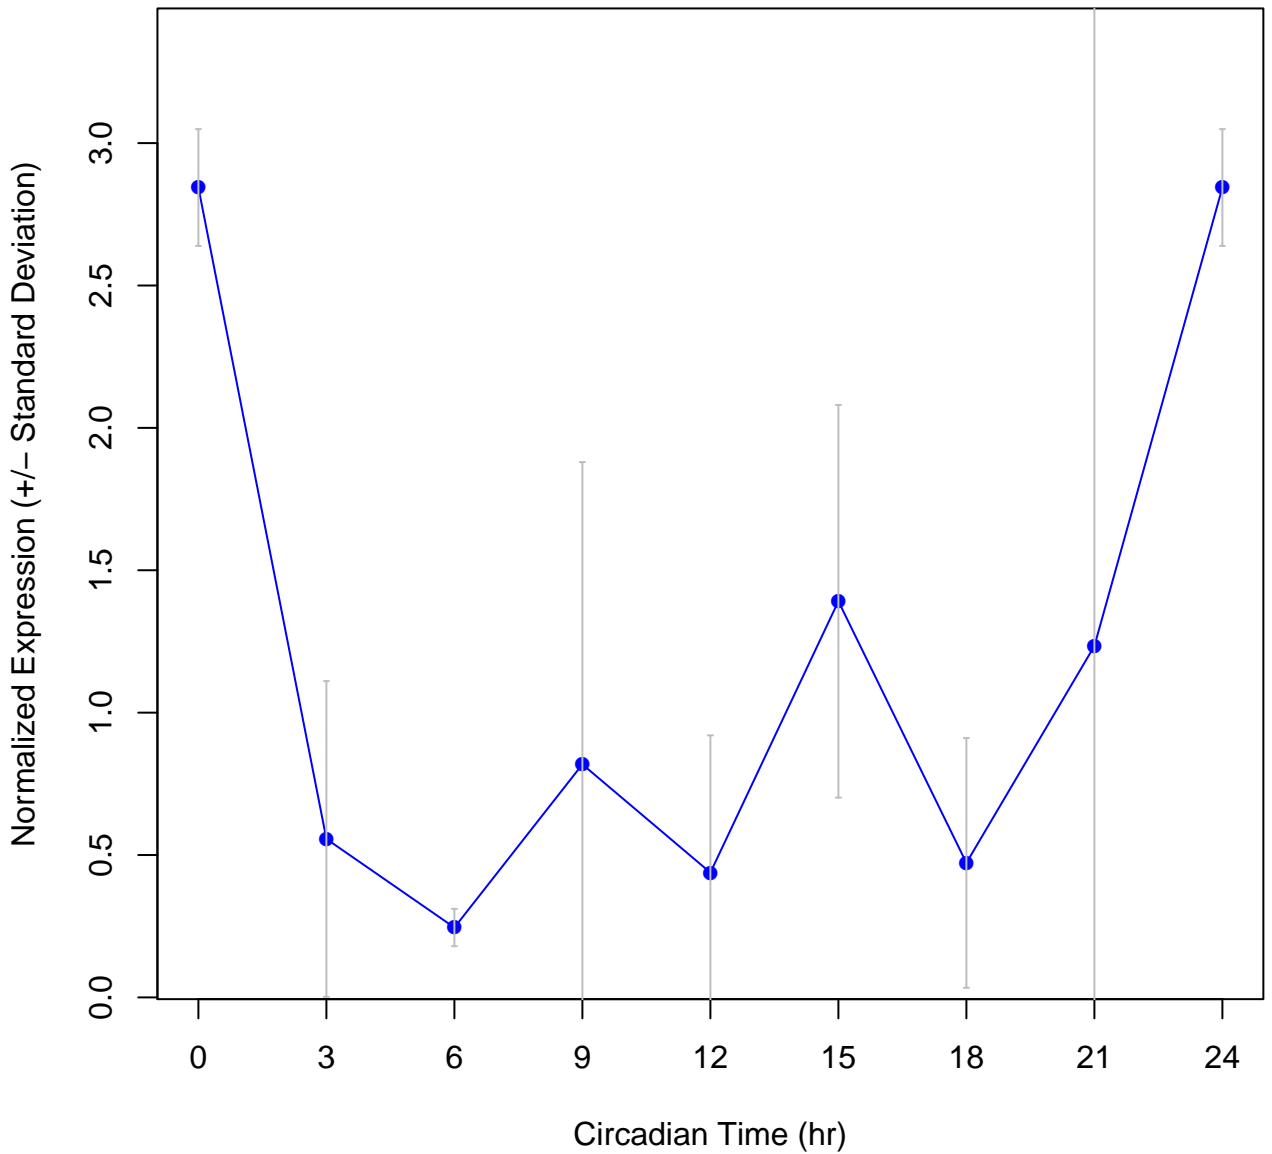

Supplement Figure 5 tpm4

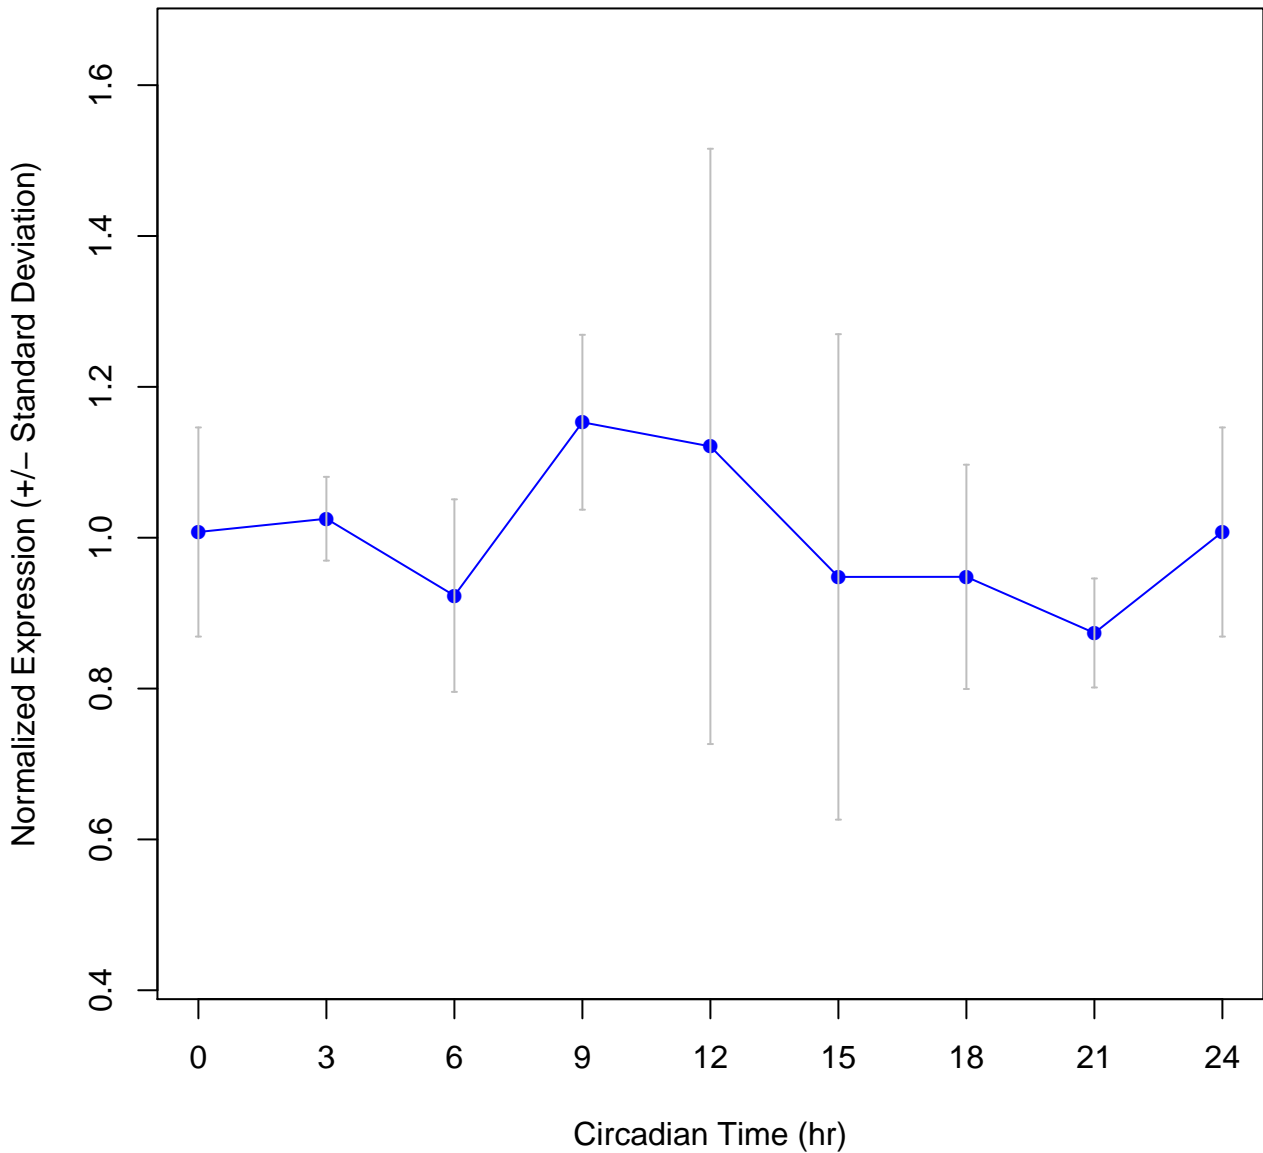

## Supplement Figure 5 tyr

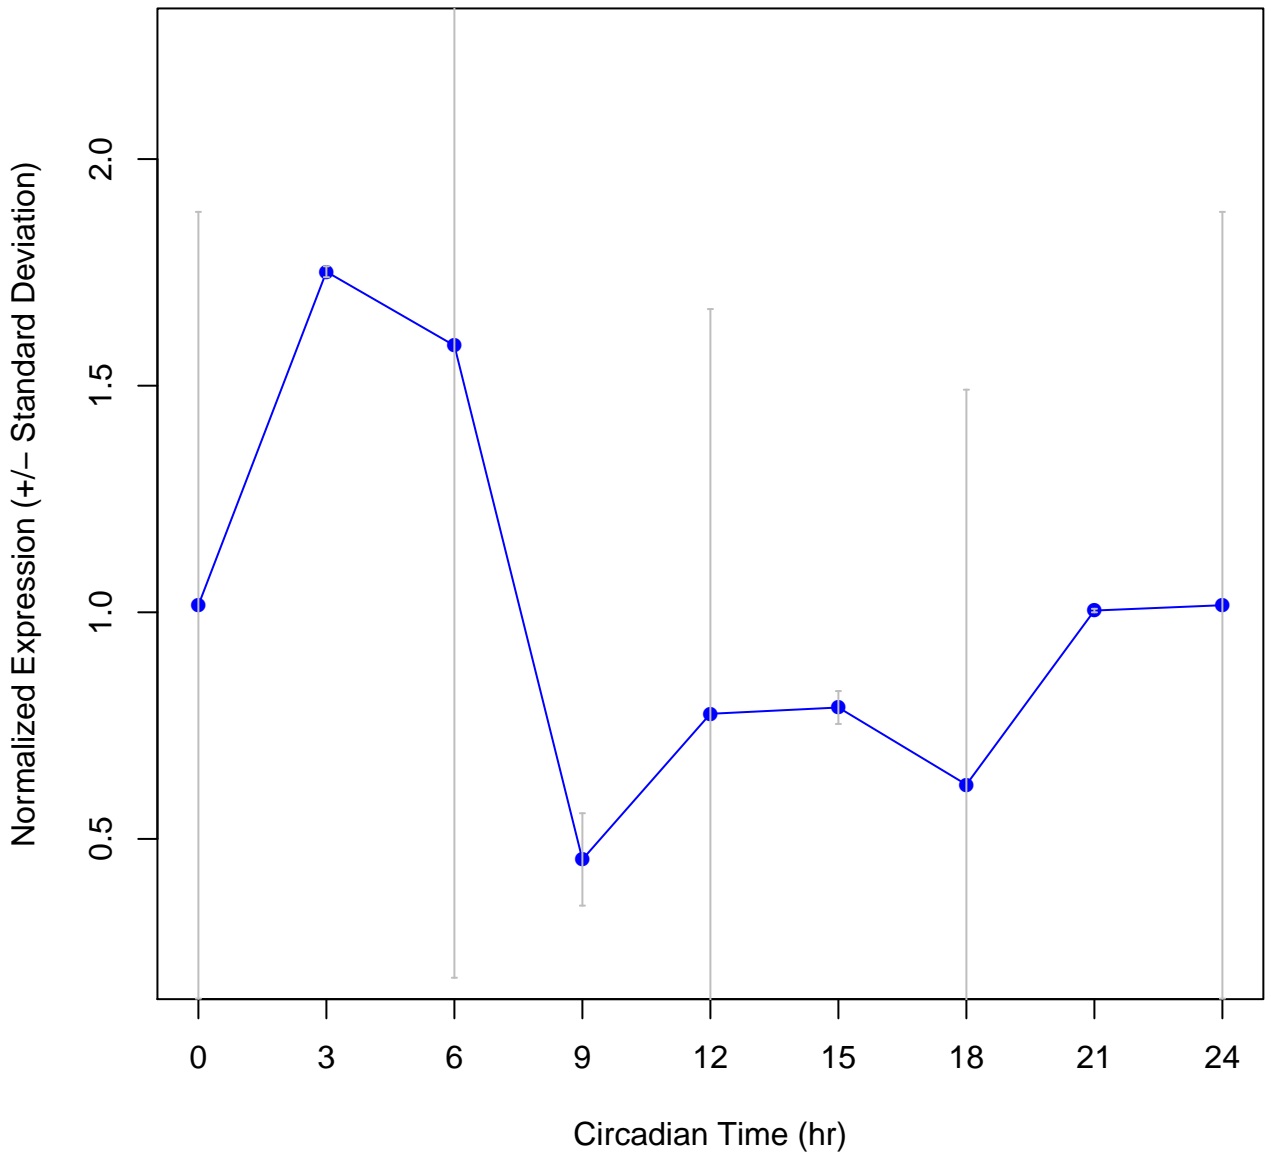

# Supplement Figure 5 tyrp1

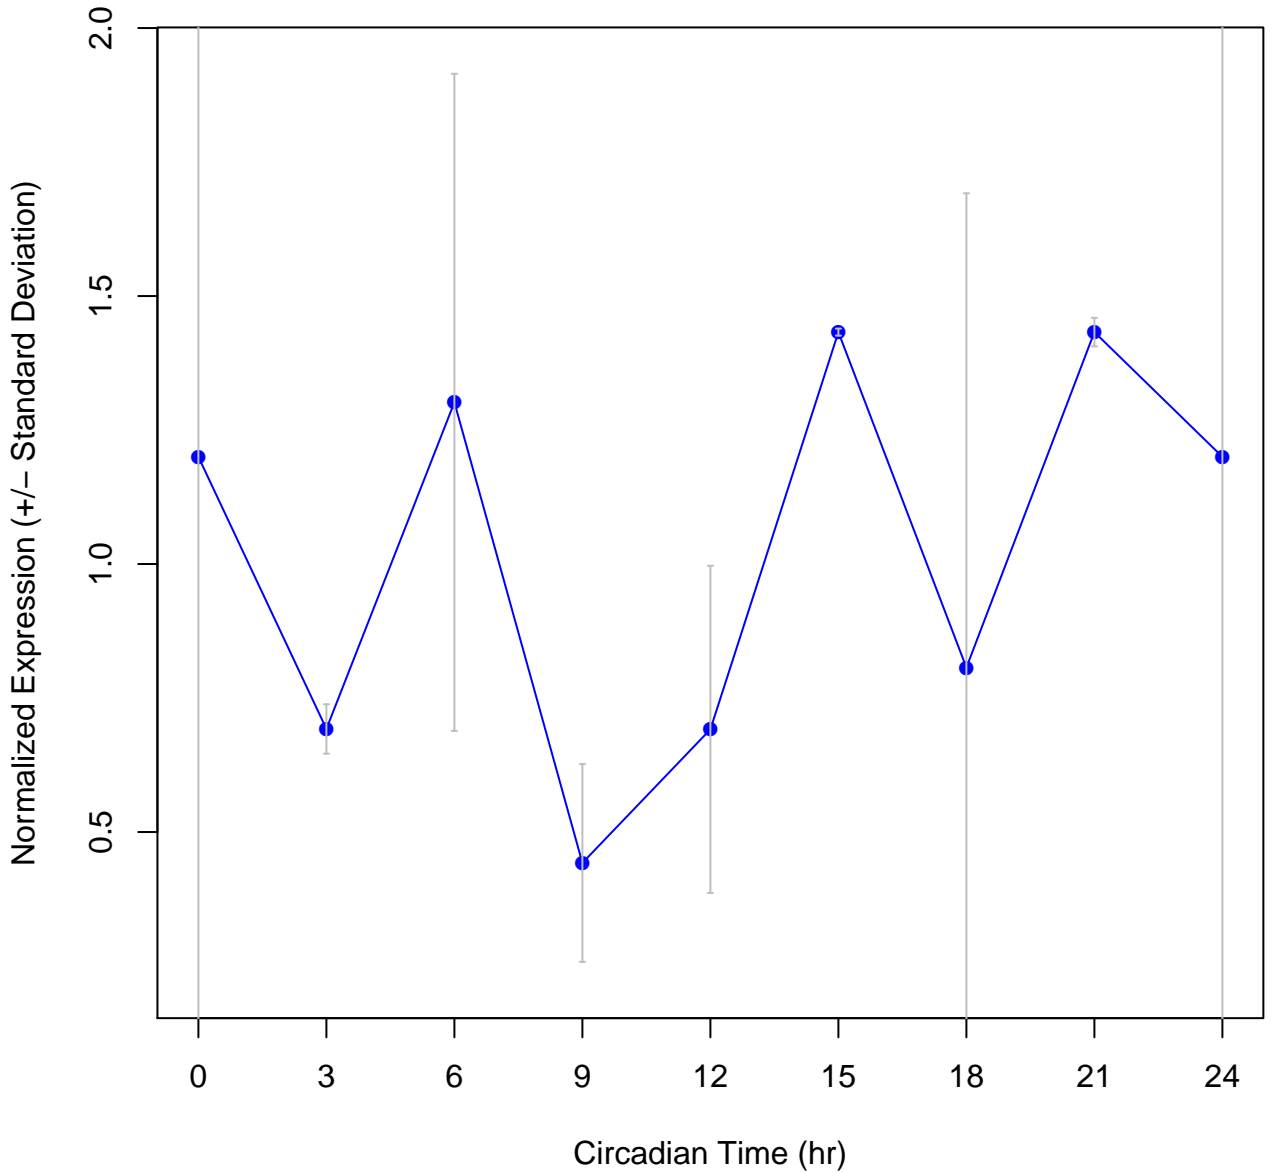

## Supplement Figure 5 *vipr1*

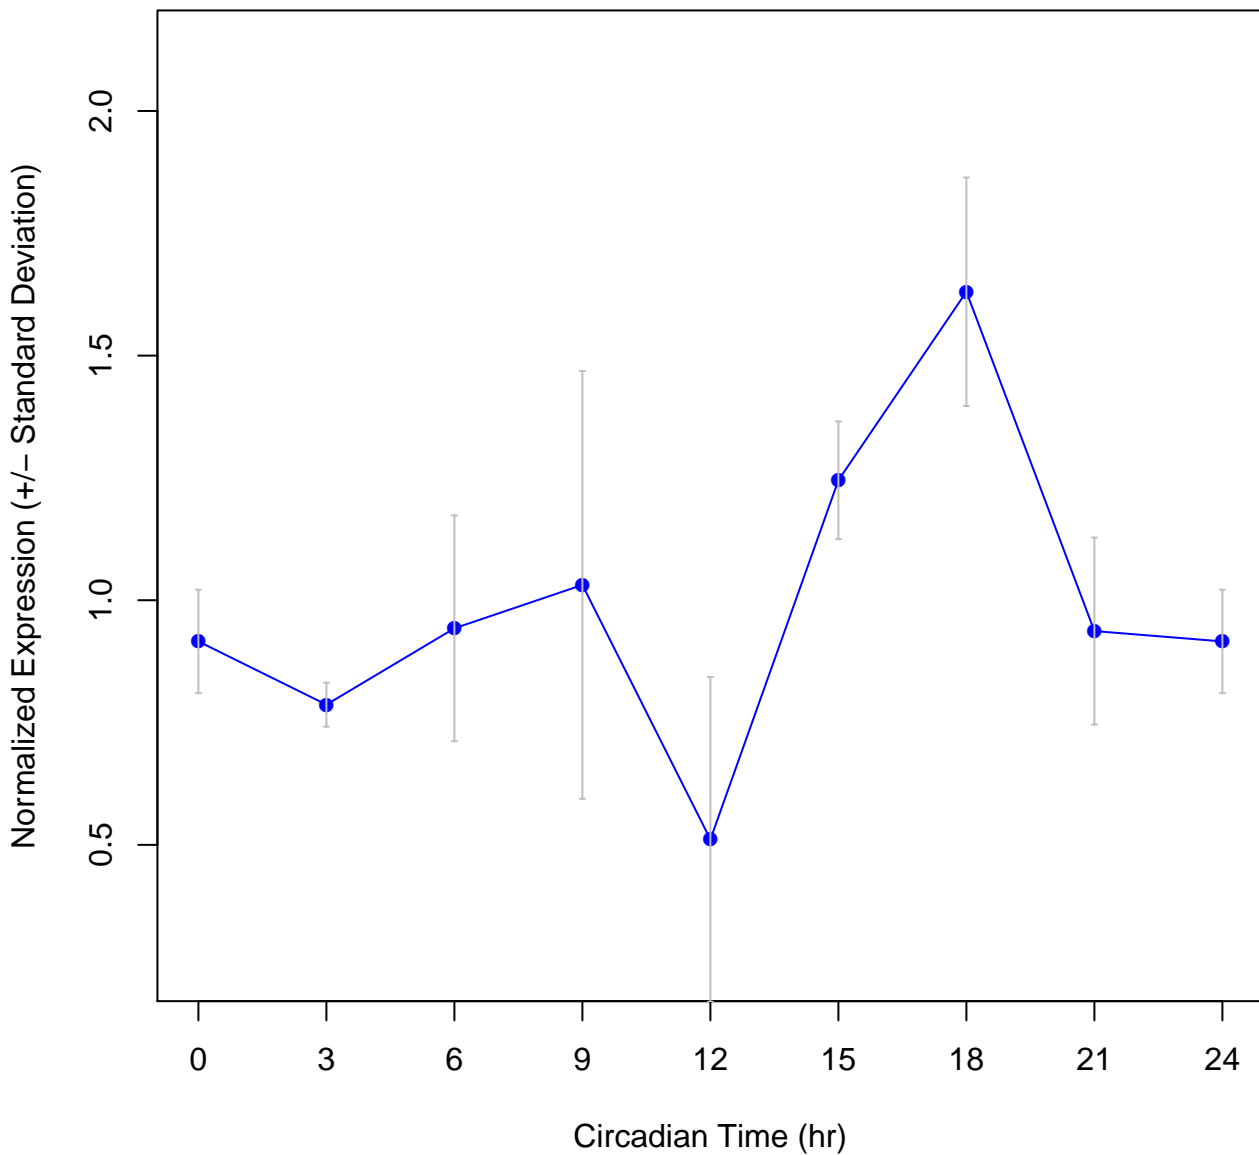

**Supplement Figure 5 wdr37**

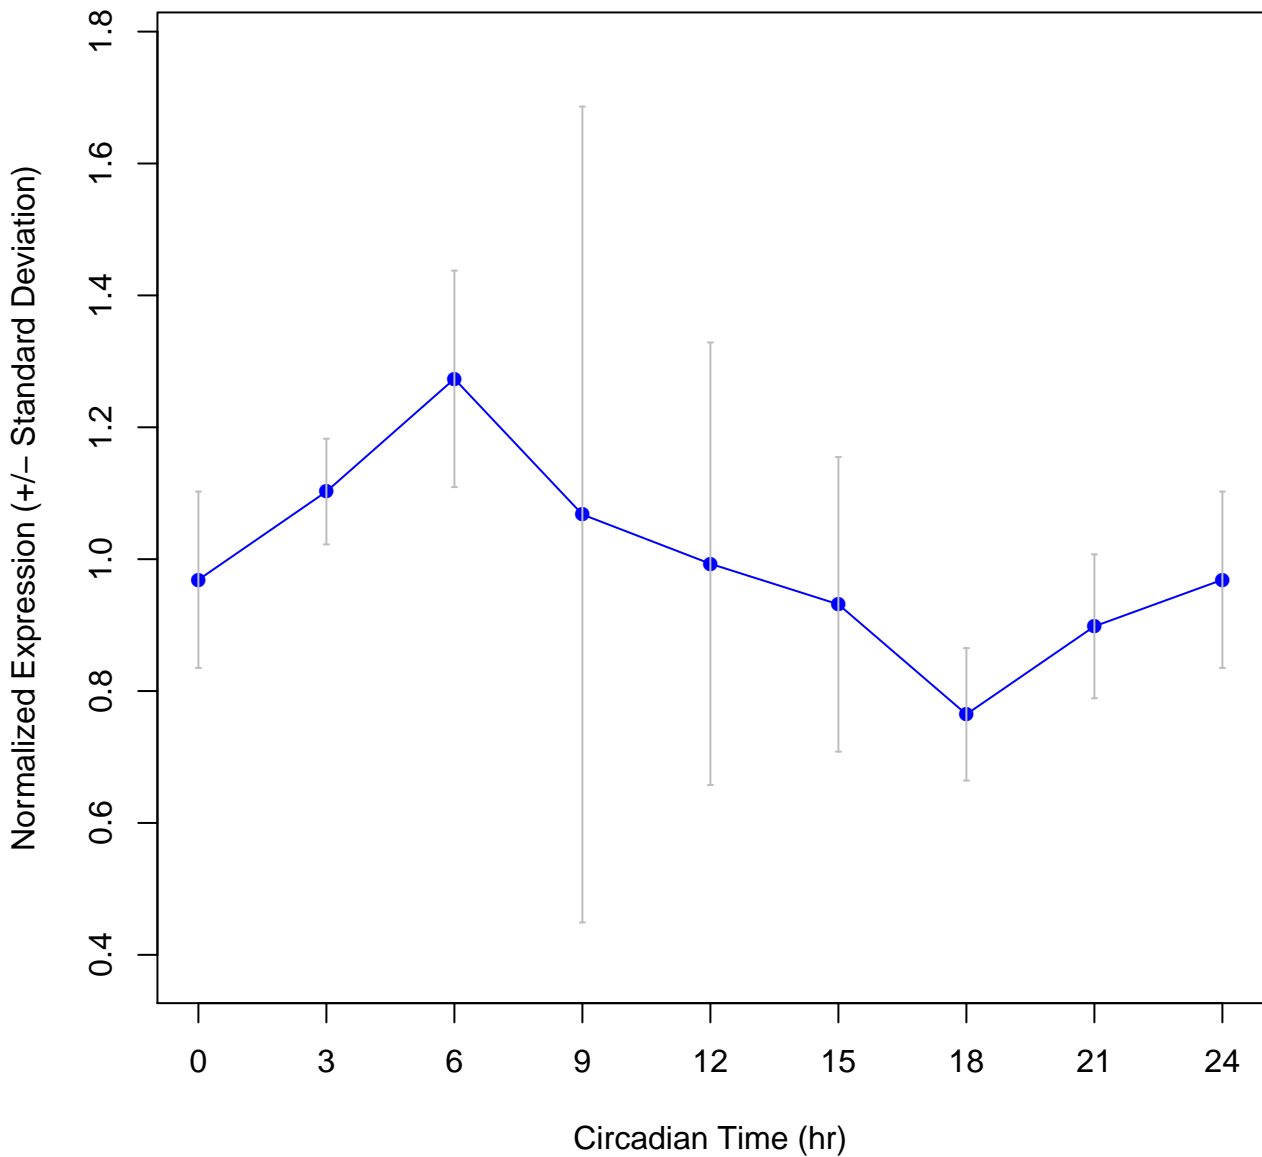



**Supplement Figure 5 wdr76**

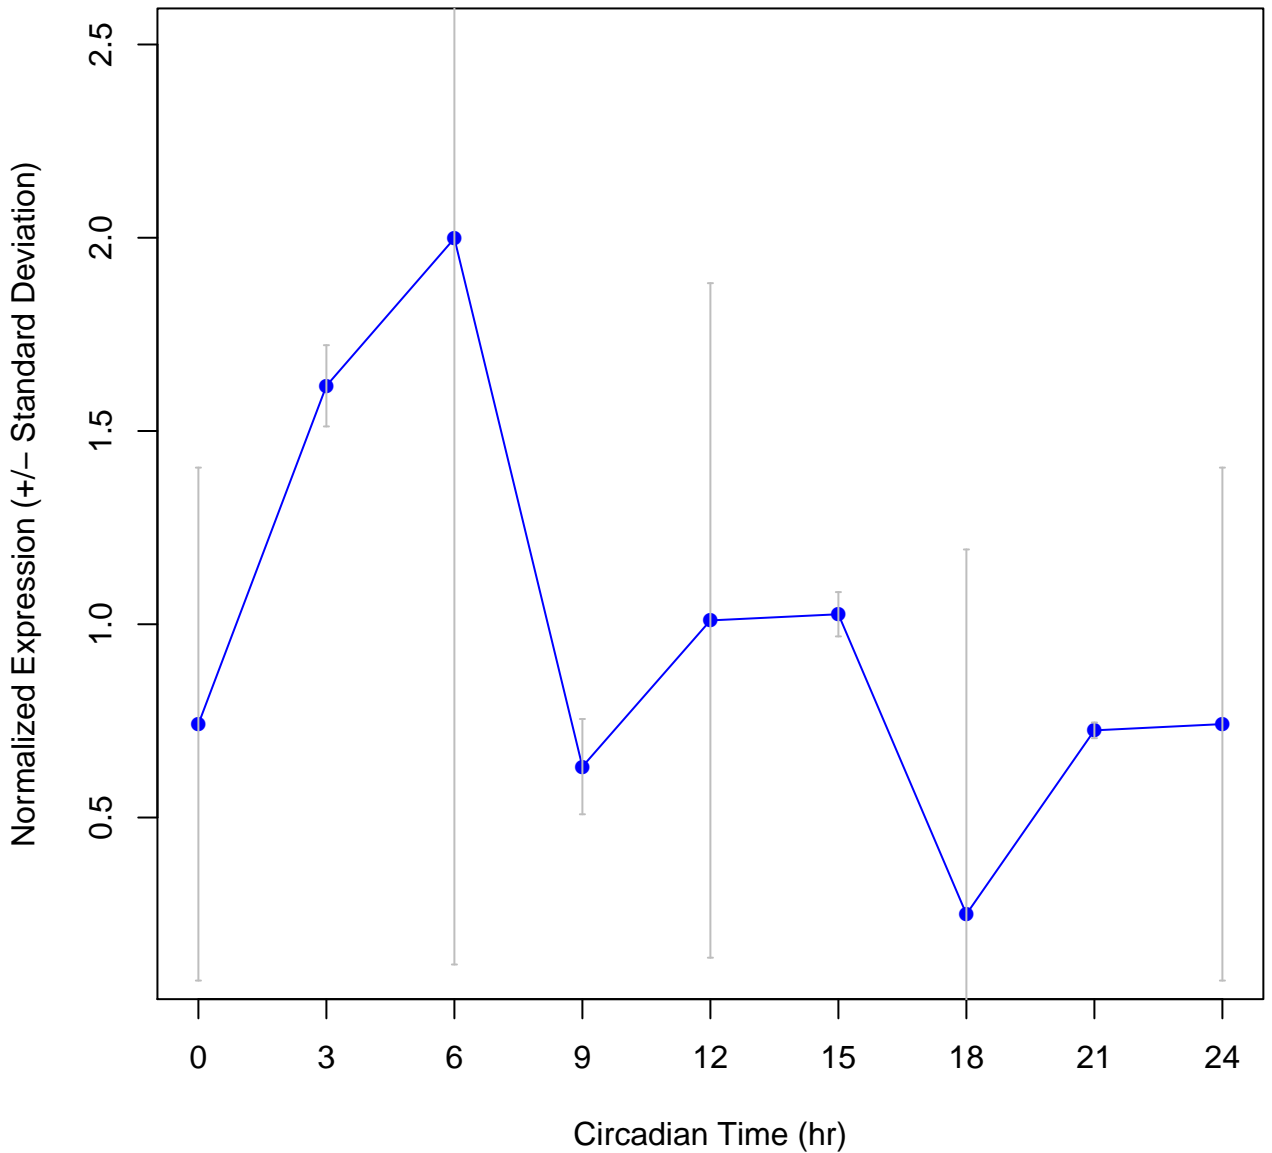

Supplement Figure 5 *wnt10b*

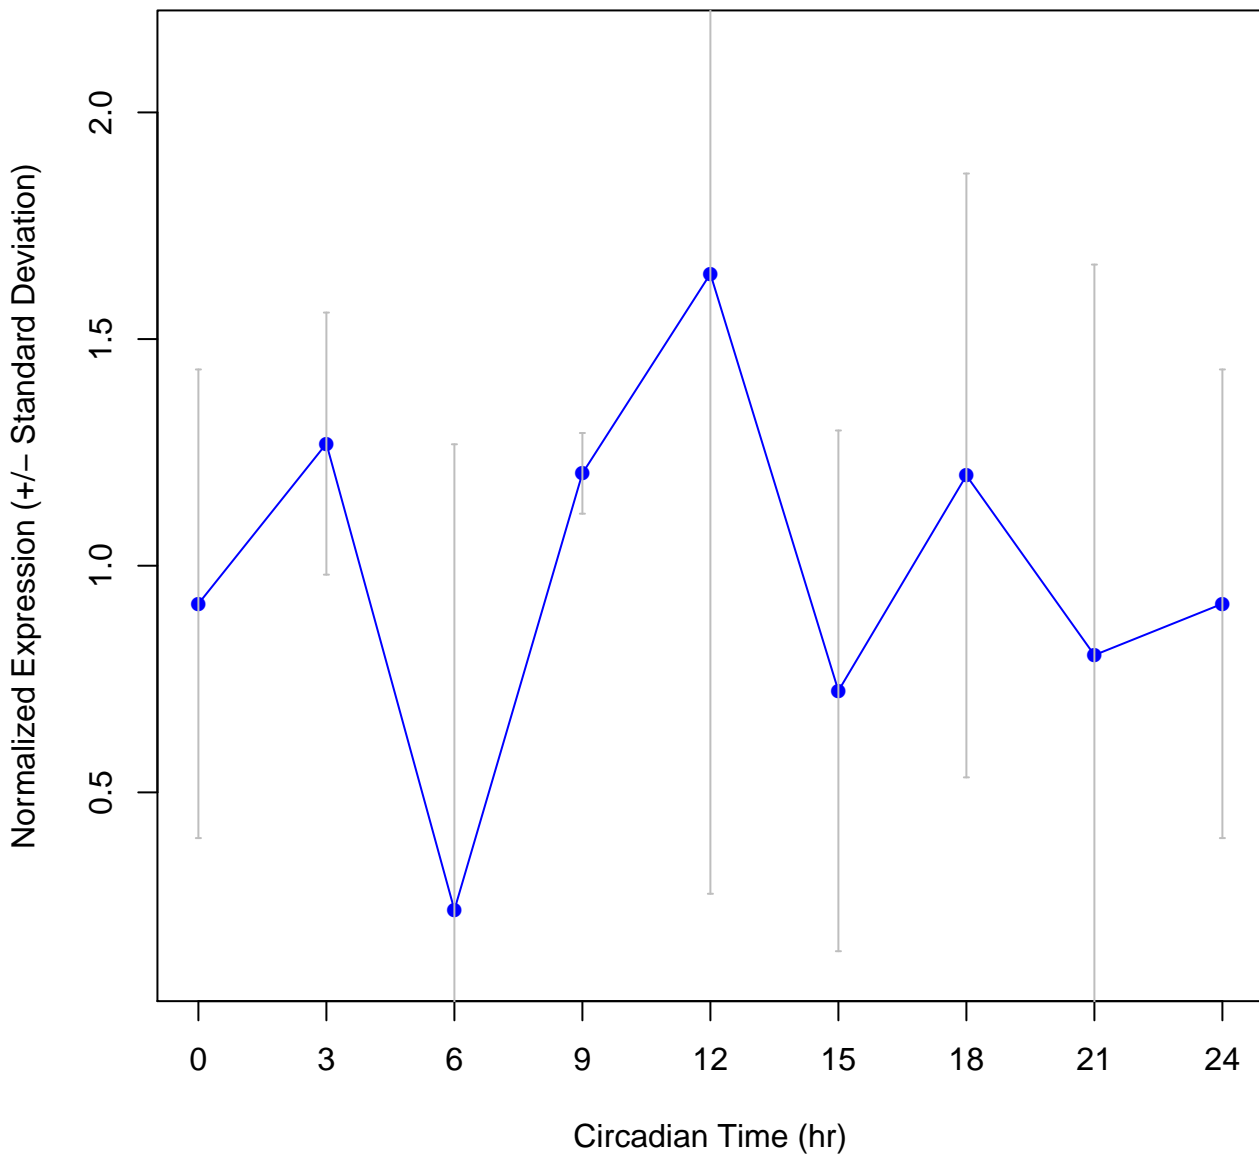

**Supplement Figure 5 wnt2b**

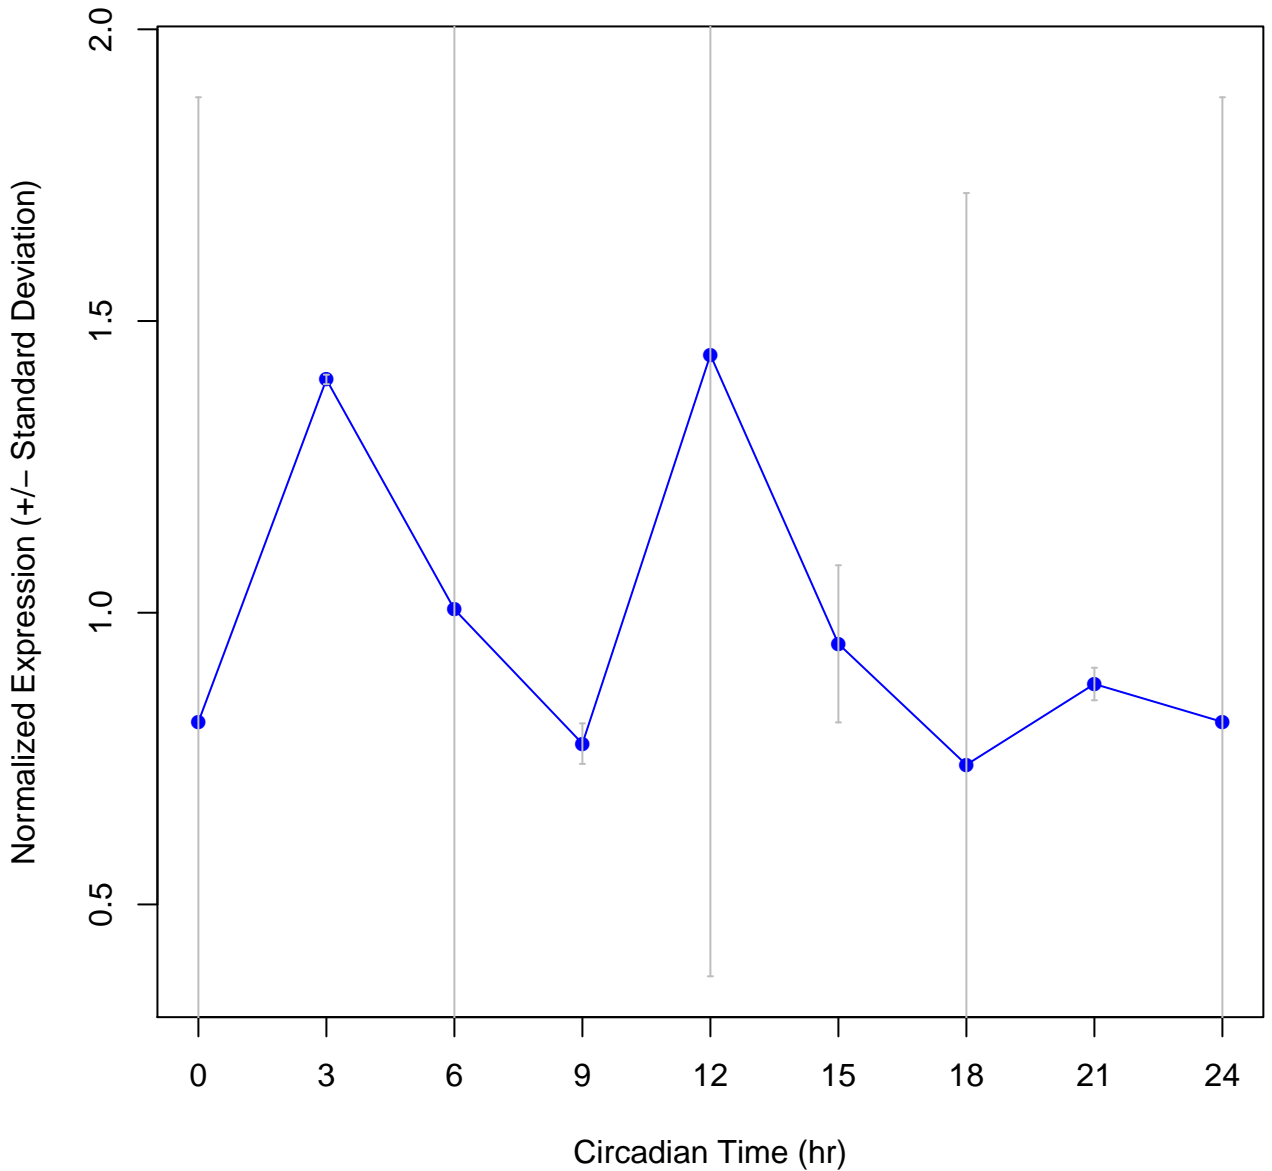

**Supplement Figure 5 wnt5a**

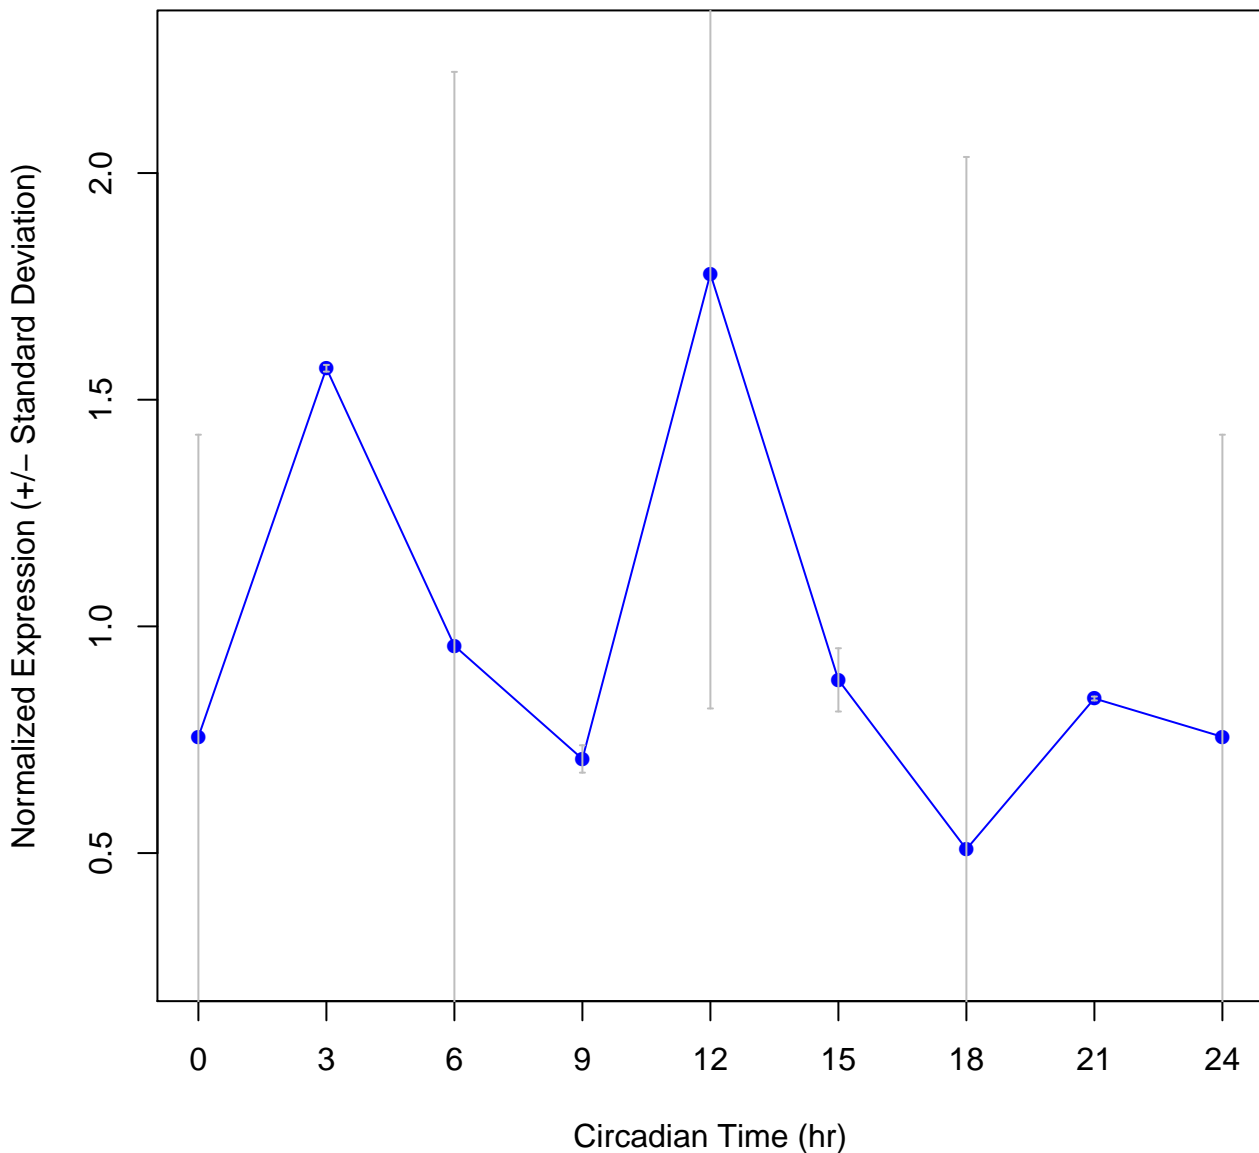

Supplement Figure 5 wt1

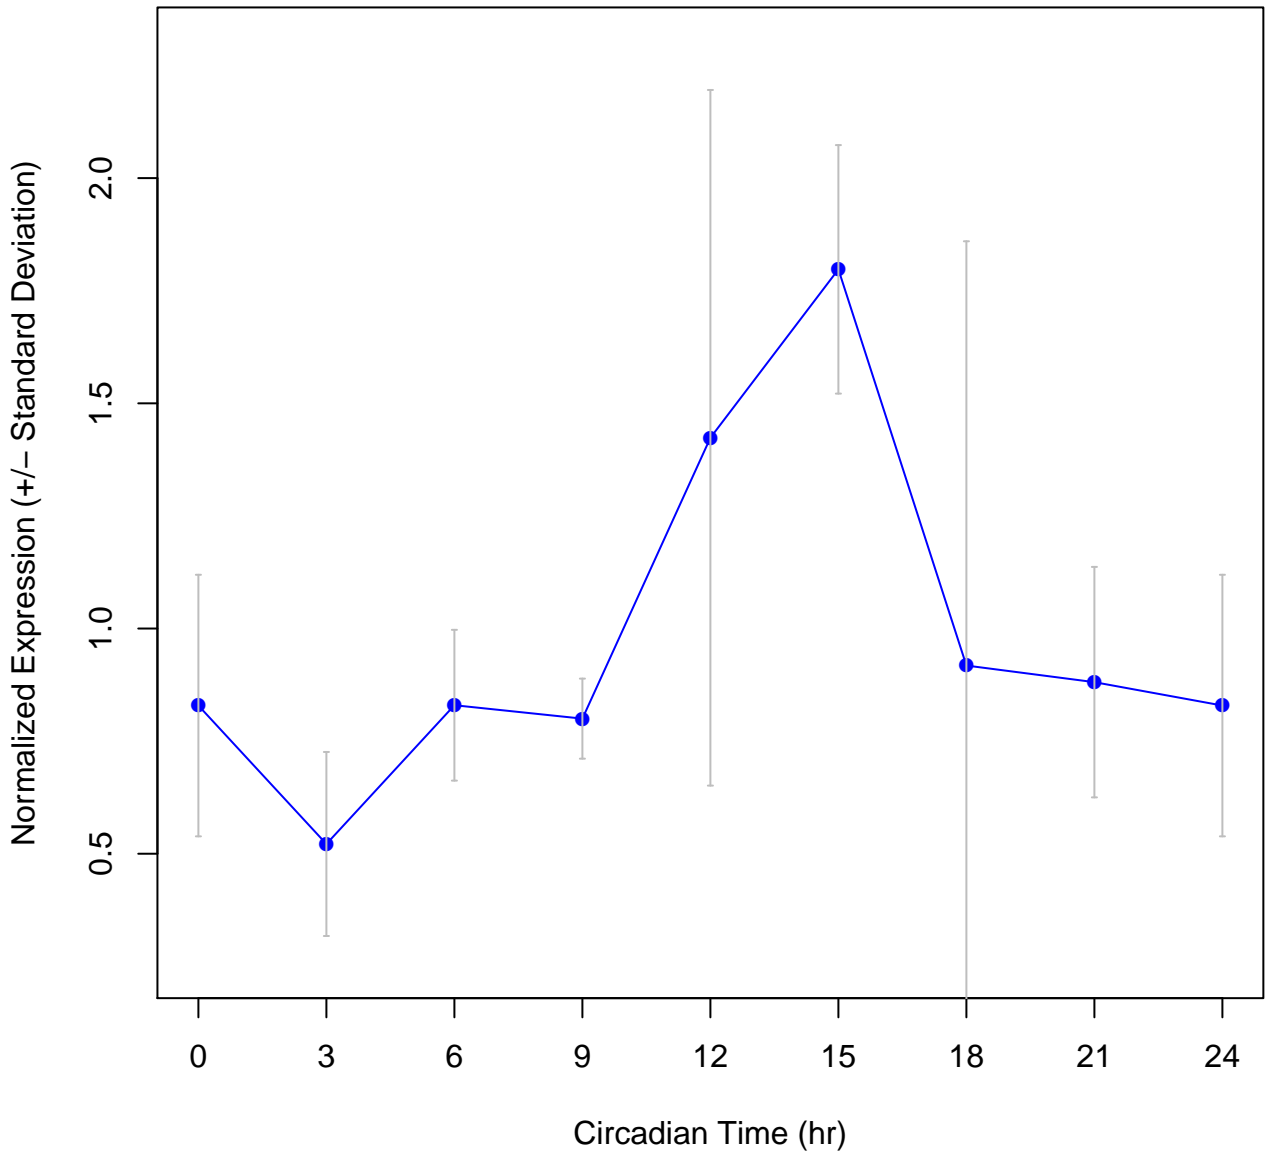

Supplement Figure 5 xpc

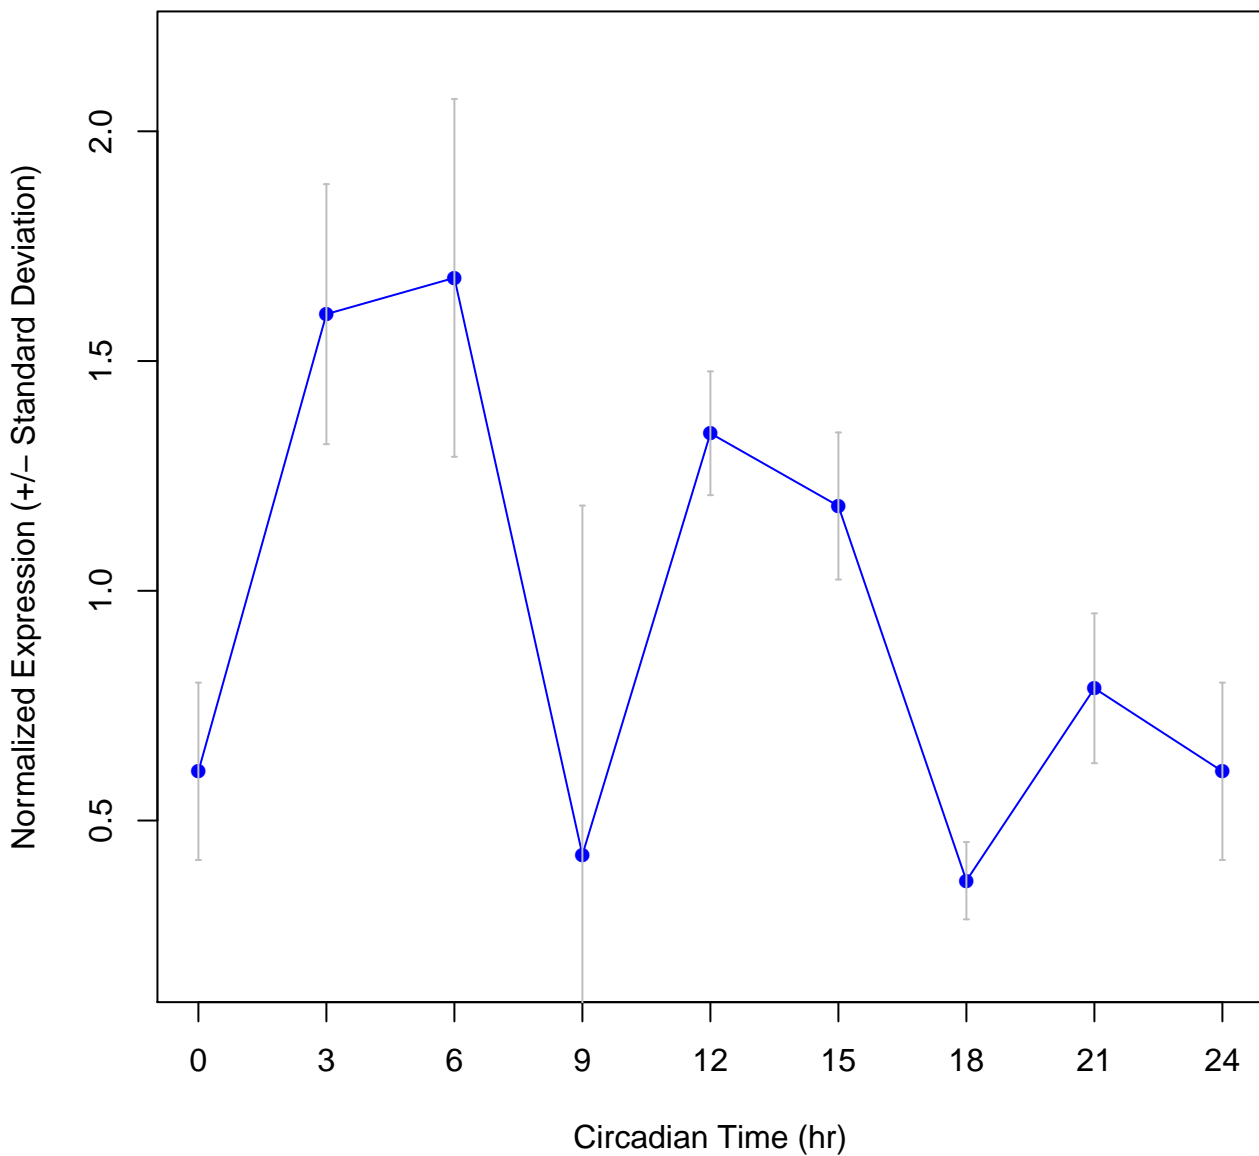

Supplement Figure 5 xrcc1

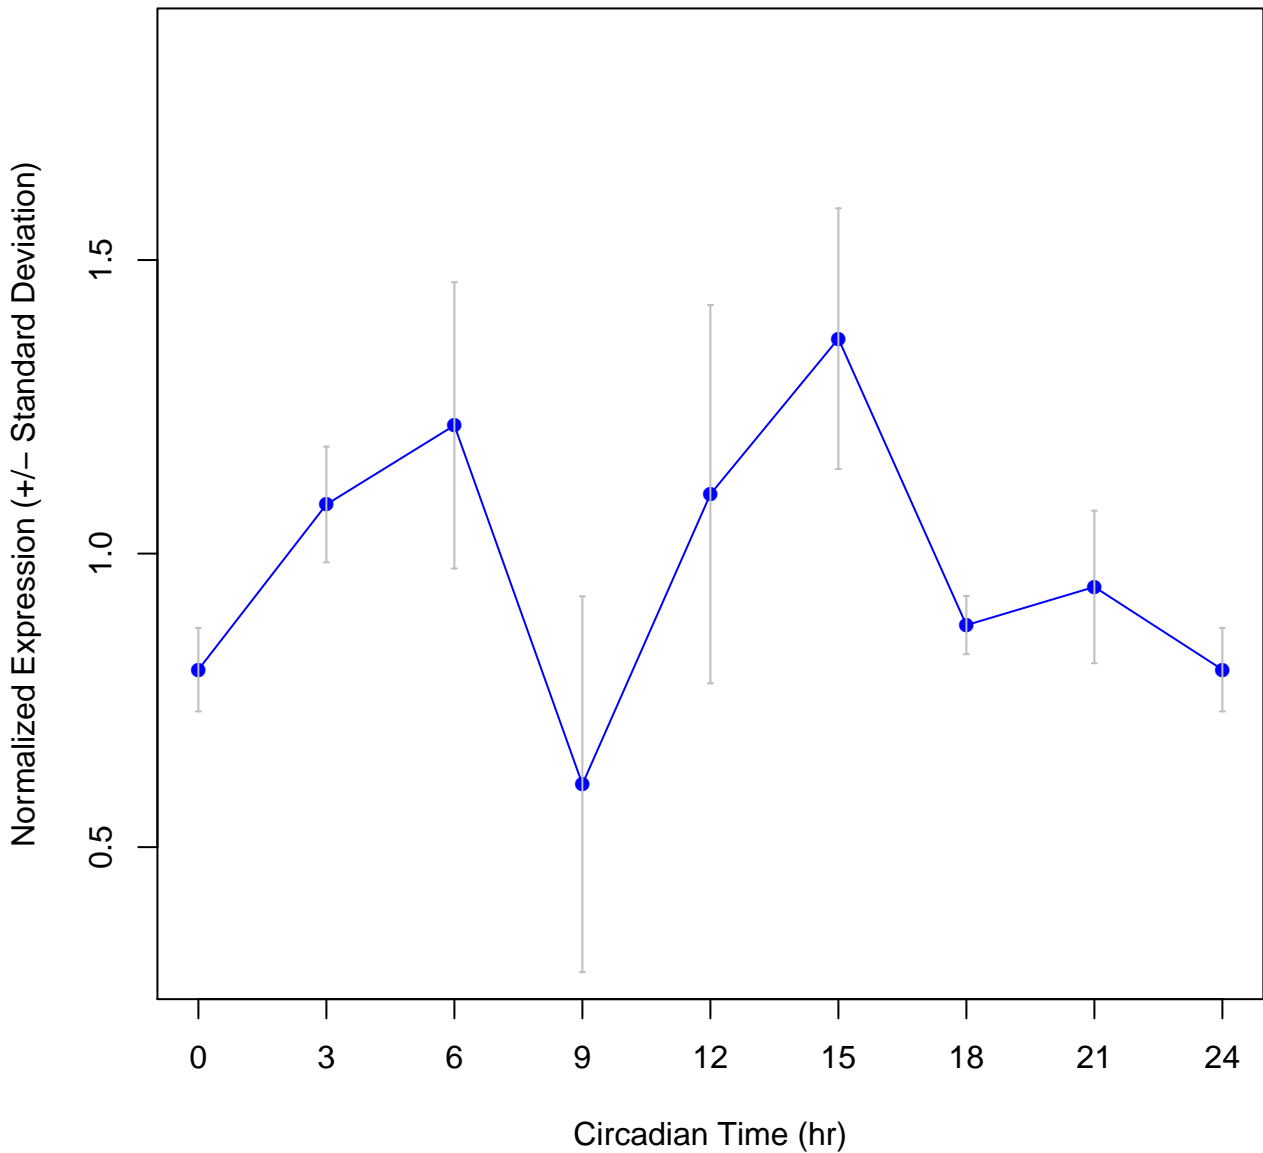

**Supplement Figure 5 ybx2**

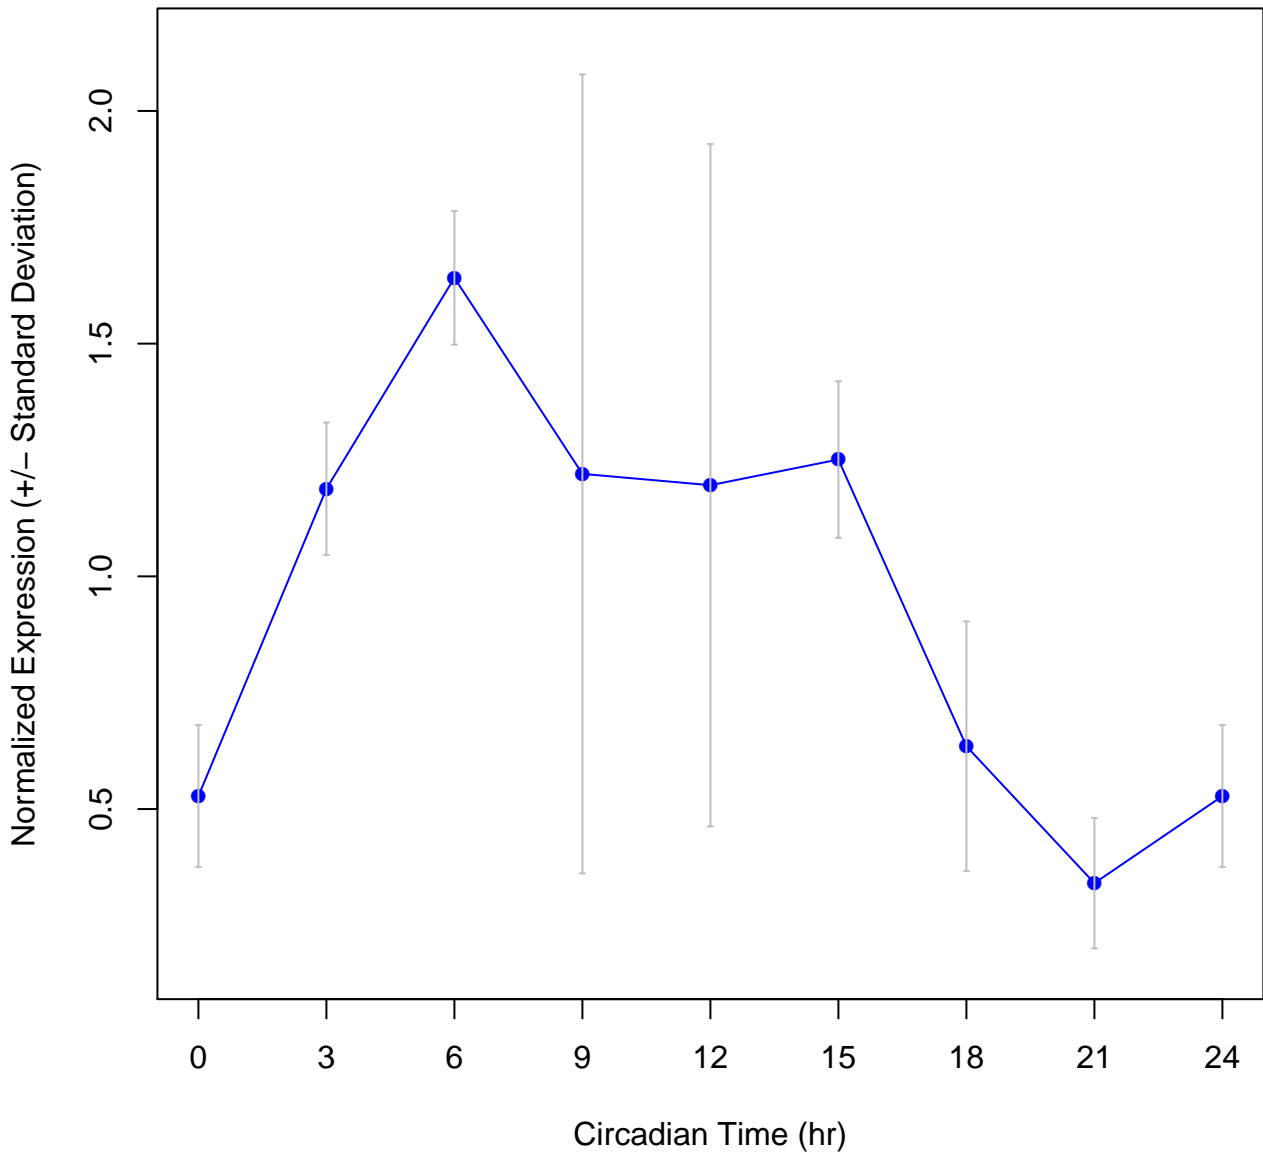



Supplement Figure 5 yme1

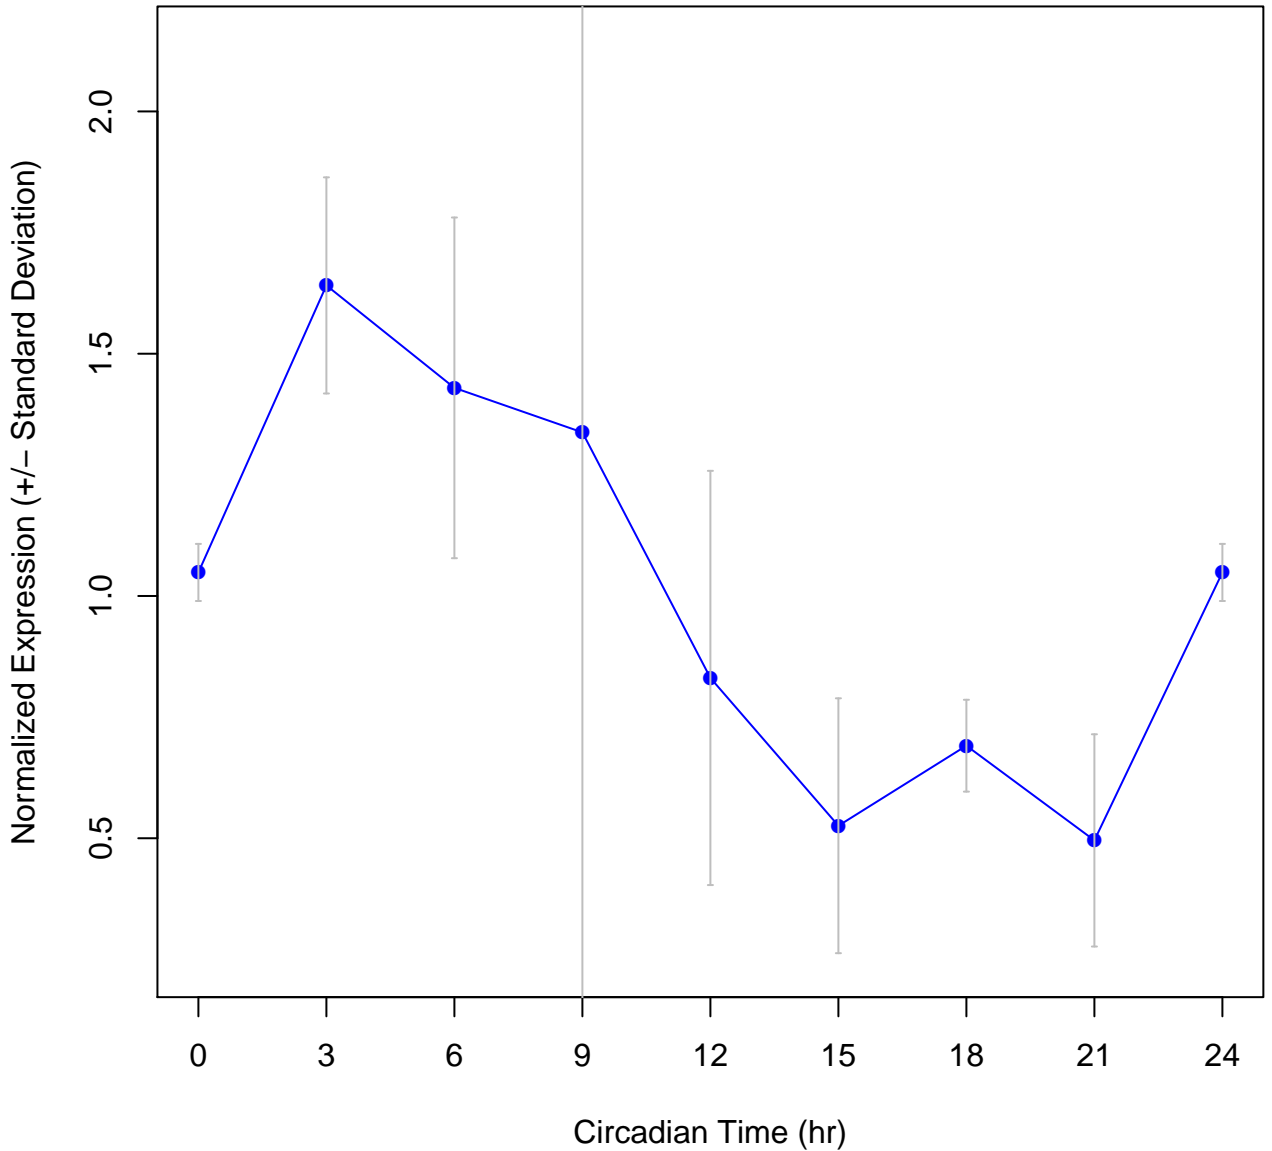

Supplement Figure 5 ywhaQ

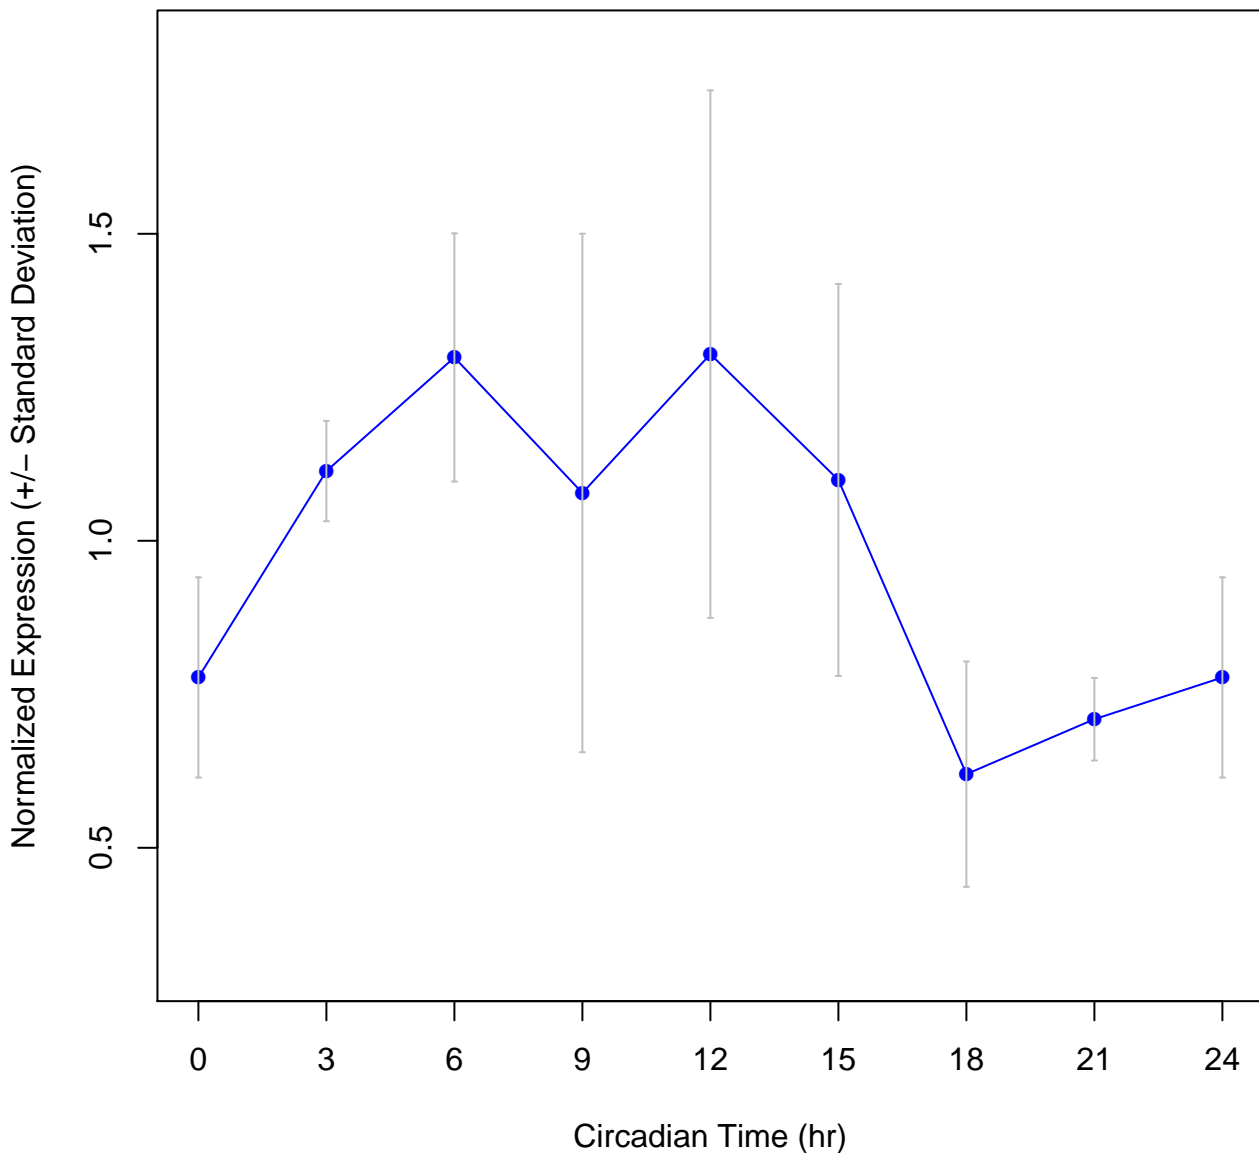

Supplement: NIHMS929820-supplement.pdf [file NIHMS929820-supplement.pdf]
